# Supplementary material for: Global cellular response to chemical perturbation of PLK4 activity and abnormal centrosome number
Source: eLife journal article supplement (doi:10.7554/elife.73944), 2022-06-10
Supplement: data2 [file elife-73944-data2-v1.zip]

1A

FLAG, INPUT

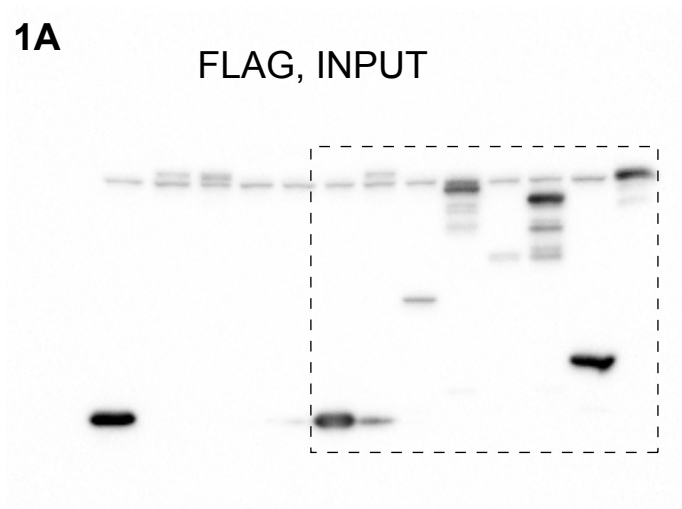

PLK4, INPUT

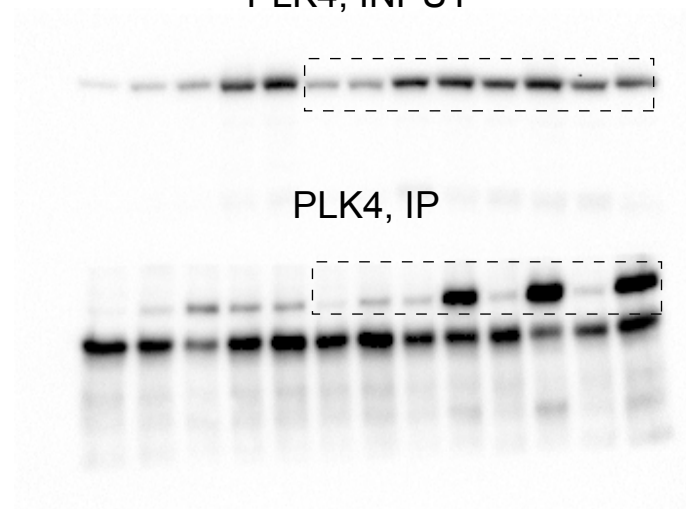

PLK4, IP

FLAG, IP

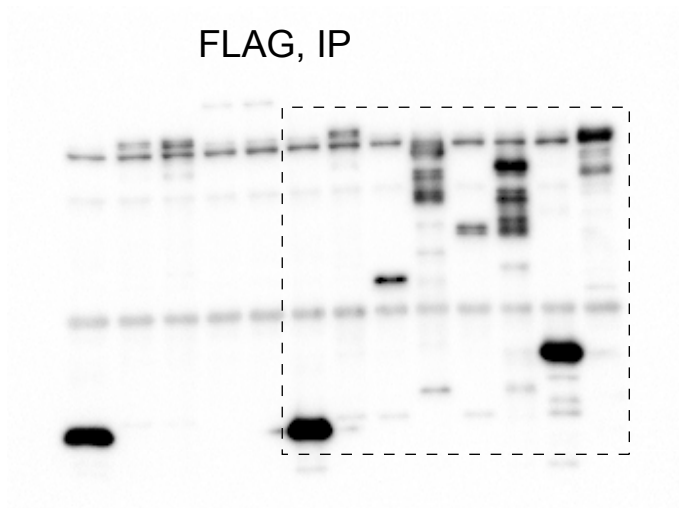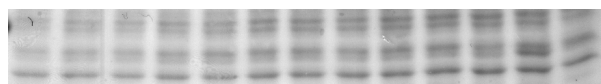

Figure 7 - figure supplement 1 Western blots

1F

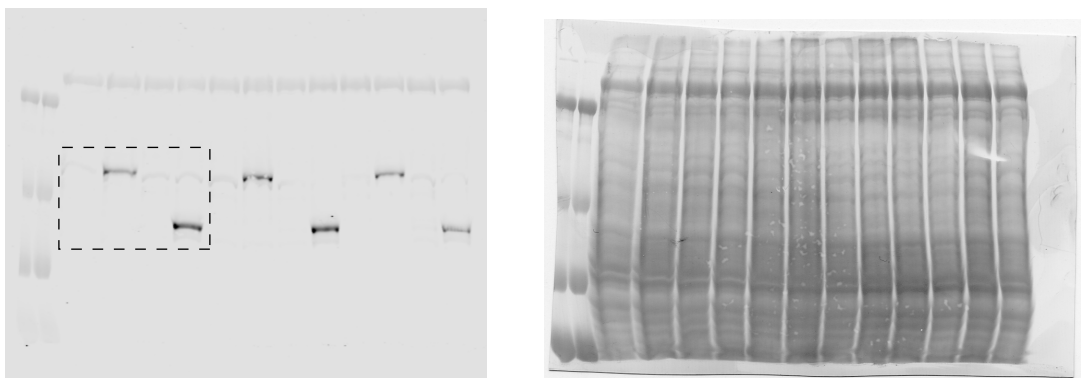

Figure 7 - figure supplement 1 Western blots
