# Supplementary material for: Global cellular response to chemical perturbation of PLK4 activity and abnormal centrosome number
Source: eLife journal article supplement (doi:10.7554/elife.73944), 2022-06-10
Supplement: data2 [file elife-73944-data2-v1.zip]

1A

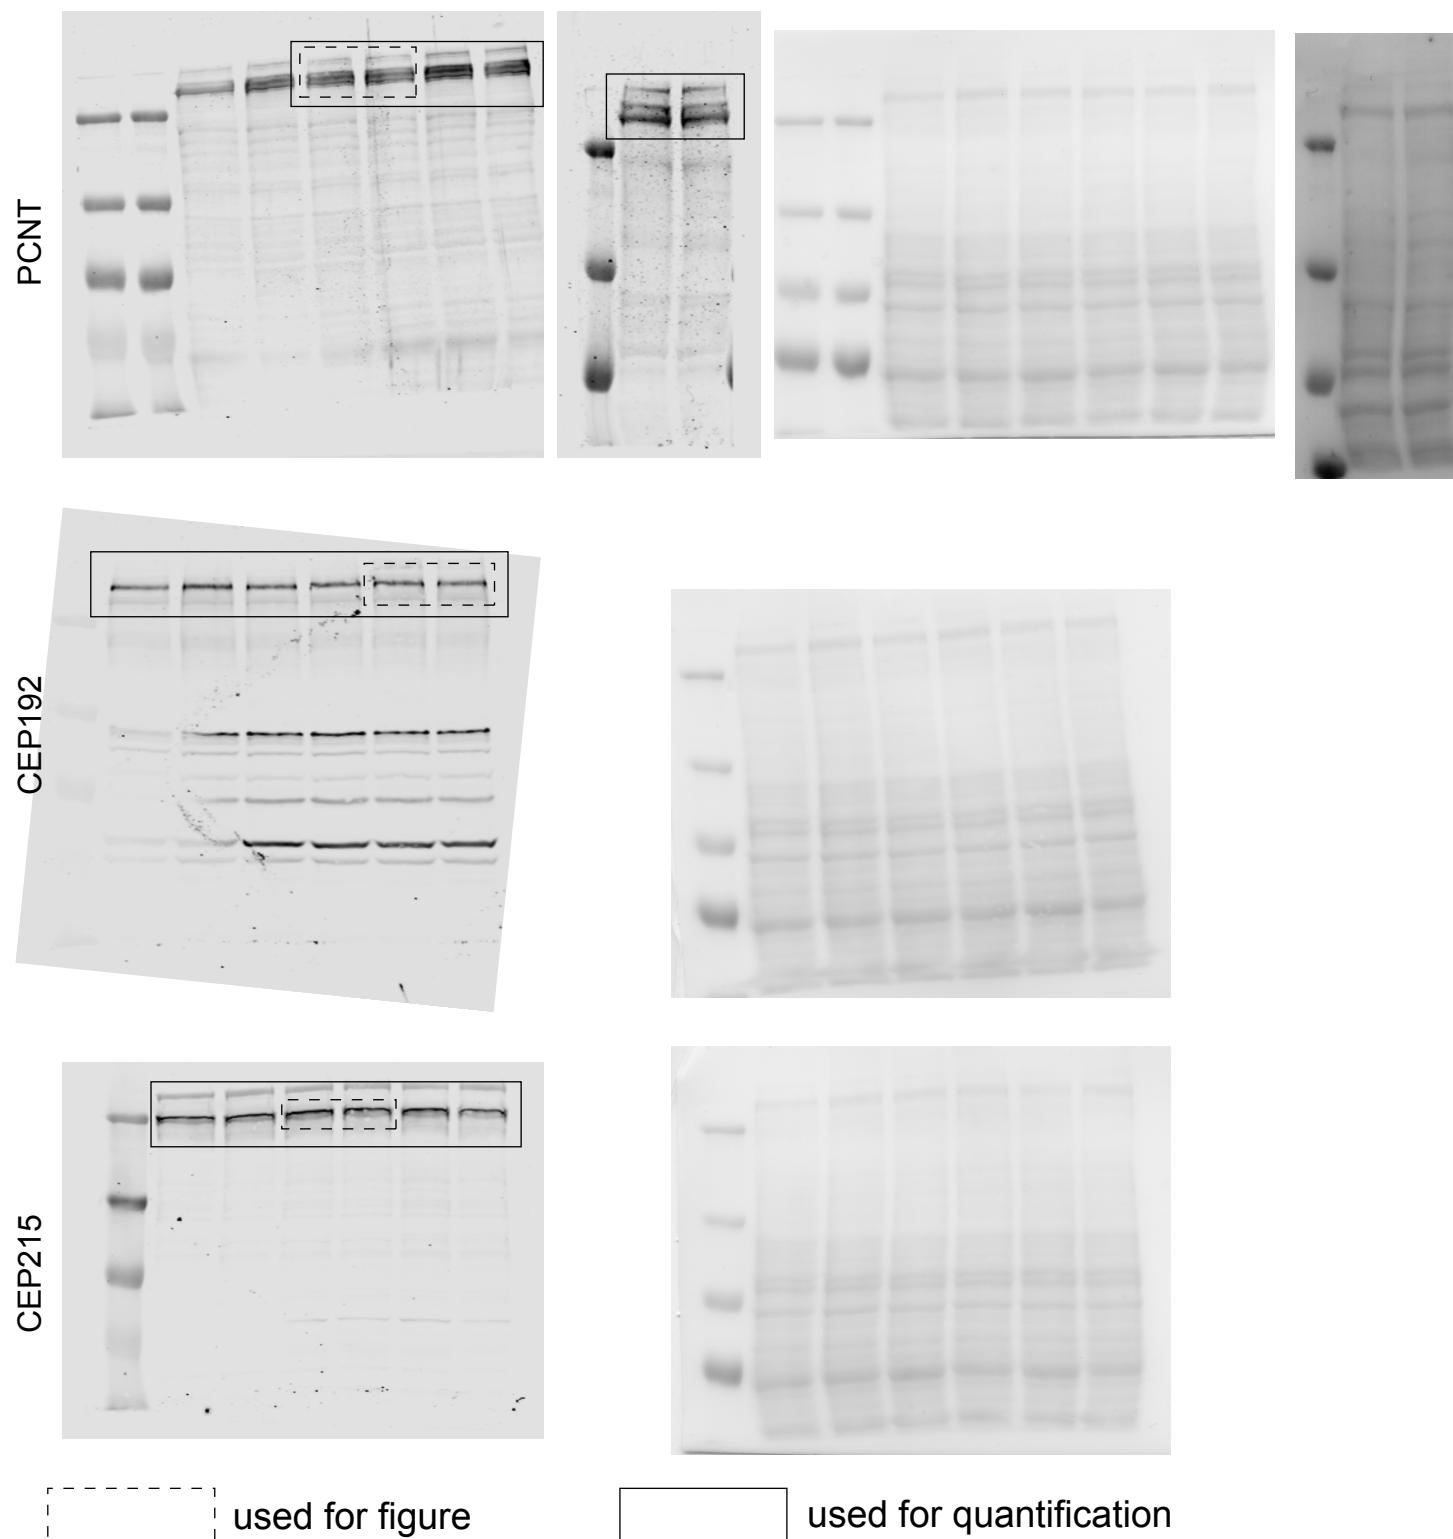

Figure 6 - figure supplement 1 Western blots

1A

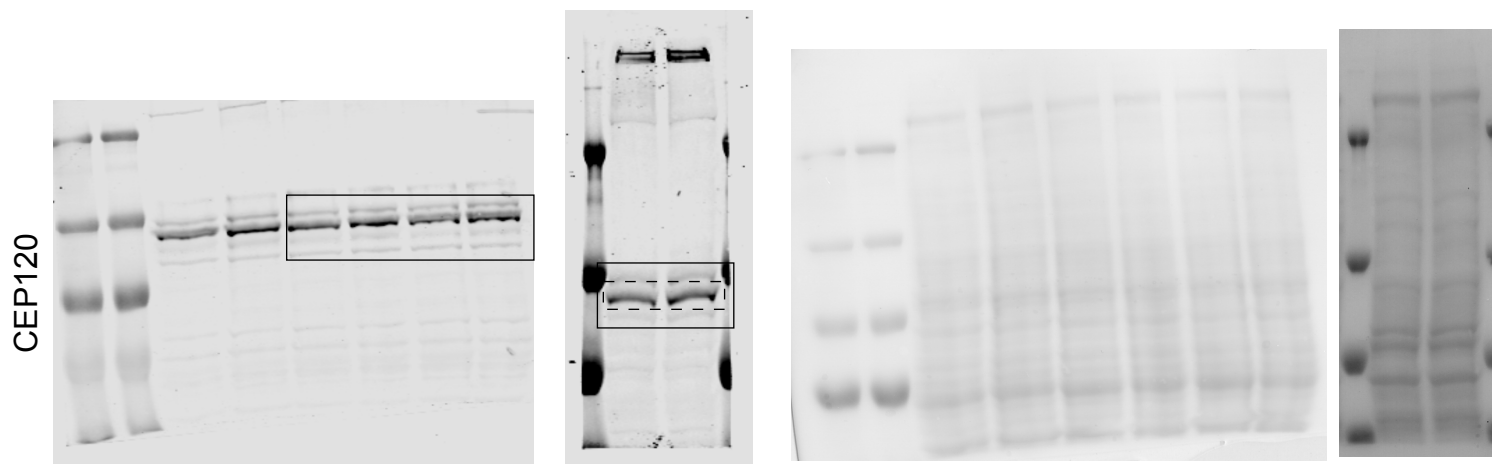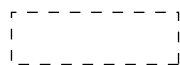

used for figure

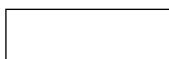

used for quantification

Figure 6 - figure supplement 1 Western blots

1B

CEP192

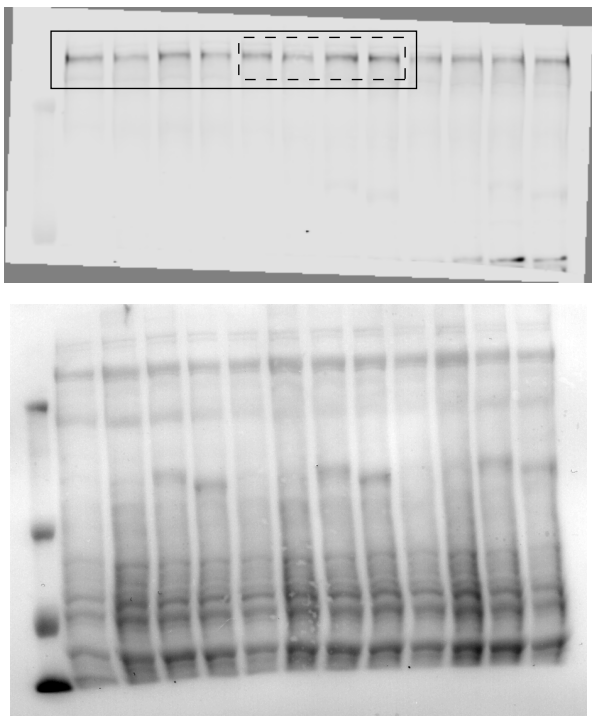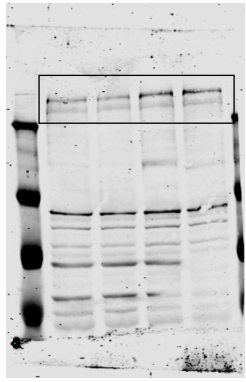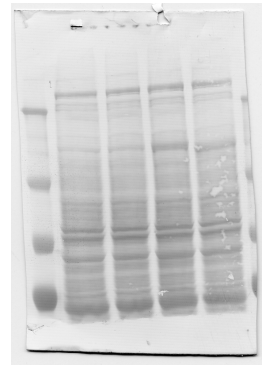

CEP215

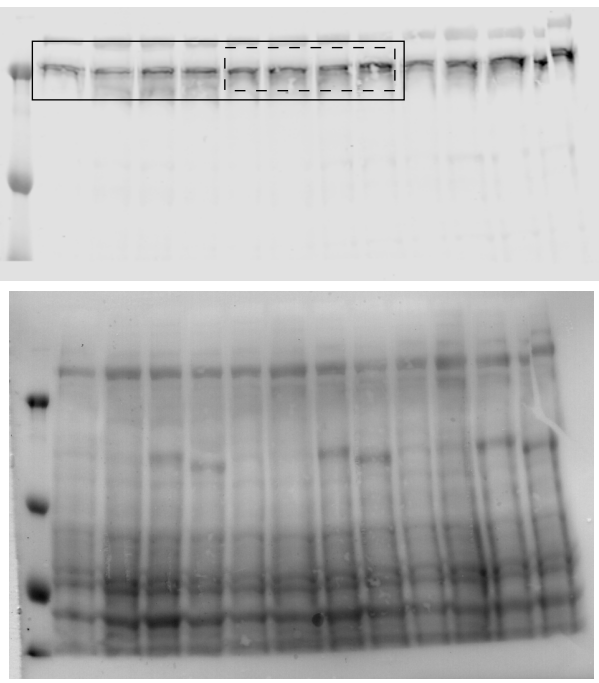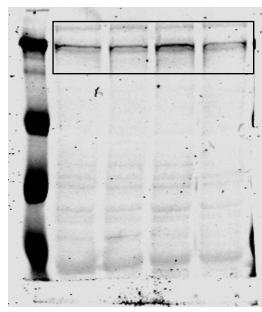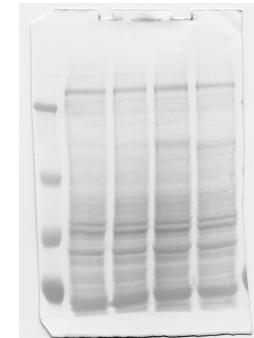

 used for figure  used for quantification

Figure 6 - figure supplement 1 Western blots

1B

PCNT

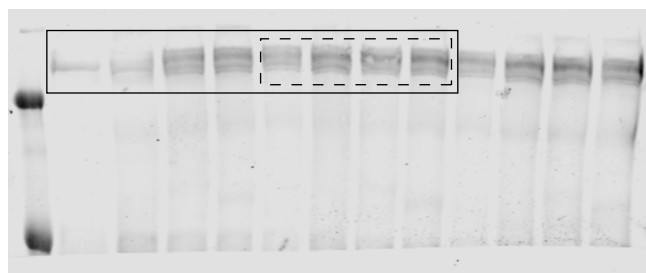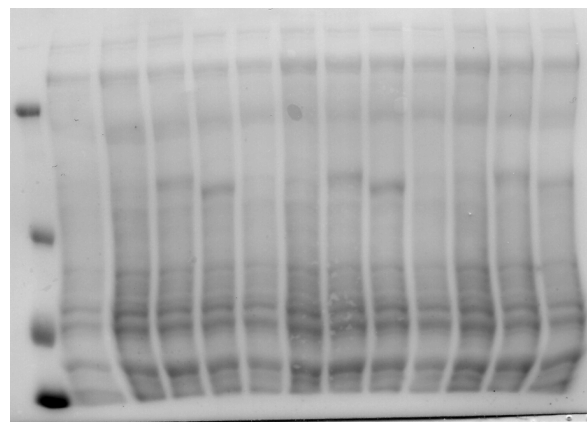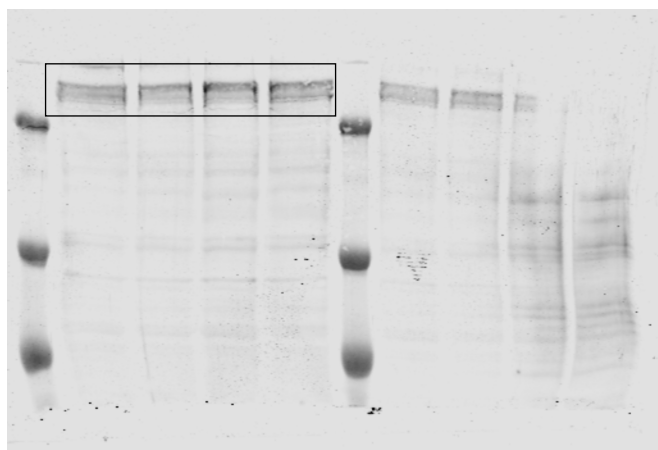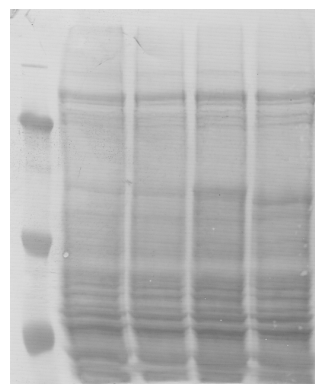

FLAG

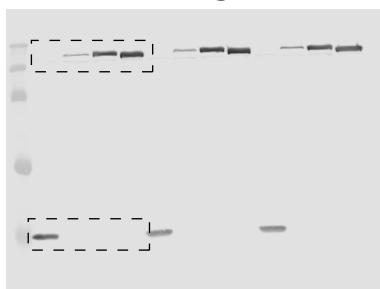

TRIM37

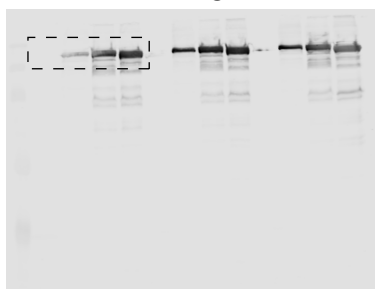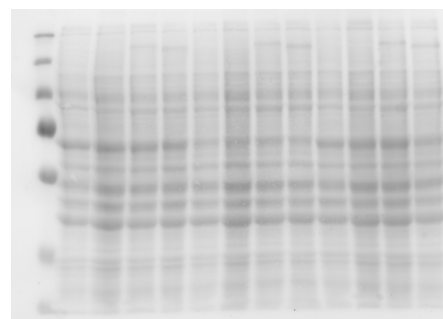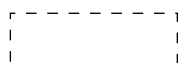

used for figure

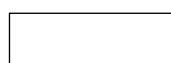

used for quantification

Figure 6 - figure supplement 1 Western blots
