# Supplementary material for: Global cellular response to chemical perturbation of PLK4 activity and abnormal centrosome number
Source: eLife journal article supplement (doi:10.7554/elife.73944), 2022-06-10
Supplement: data2 [file elife-73944-data2-v1.zip]

1A

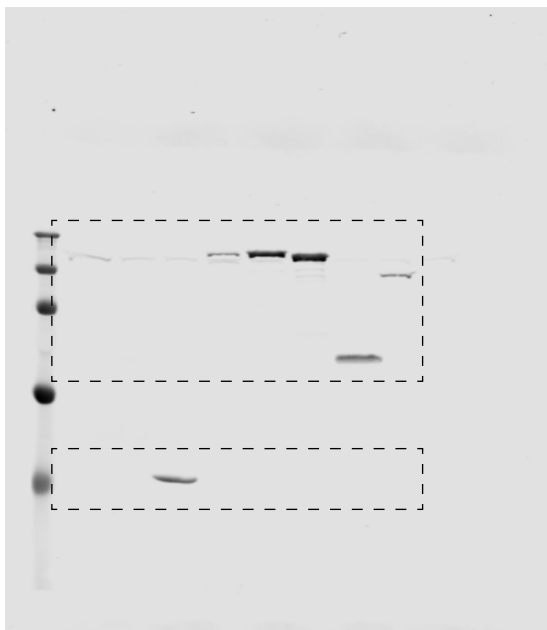

1B

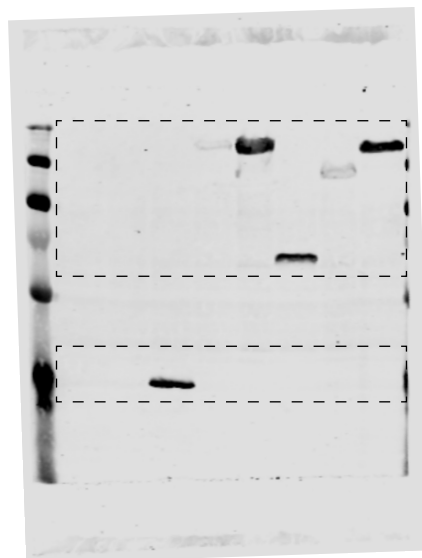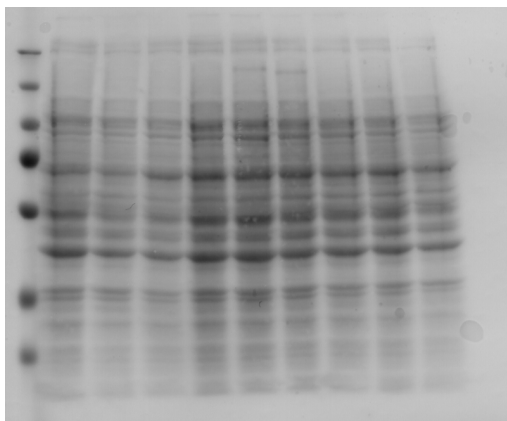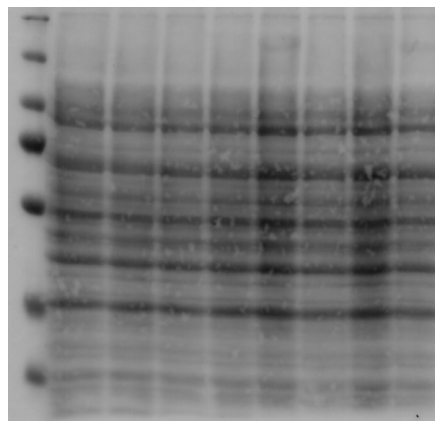

Figure 4 - figure supplement 1 Western blots

1D

RPE-1

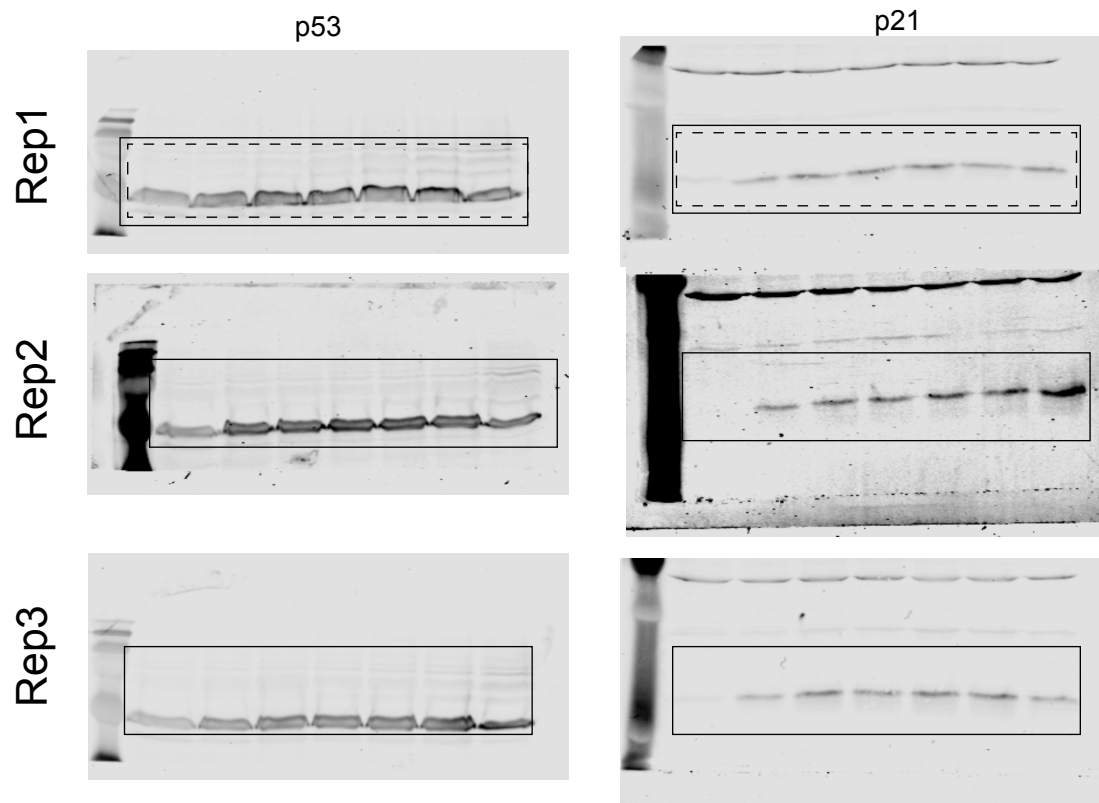

Rep1

Rep2

Rep3

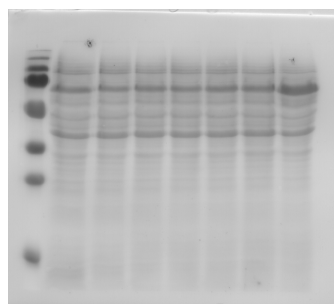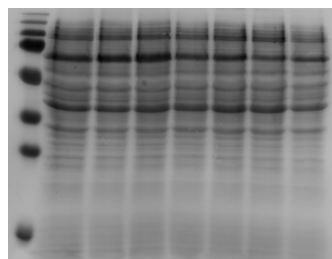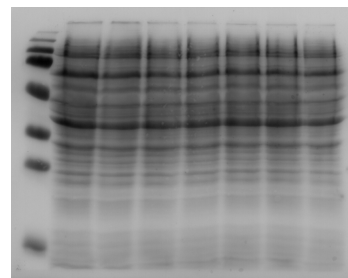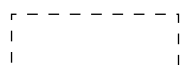

used for figure

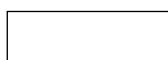

used for quantification

Figure 4 - figure supplement 1 Western blots

1D

RPE-1 *TRIM37*<sup>-/-</sup>

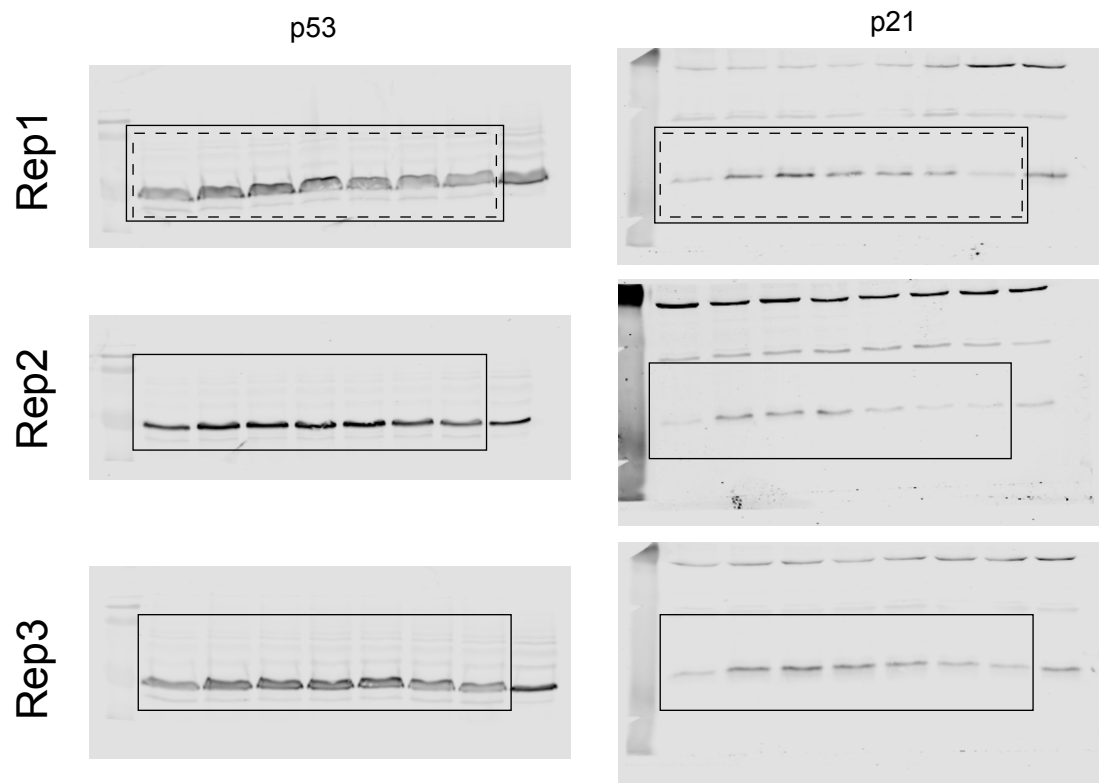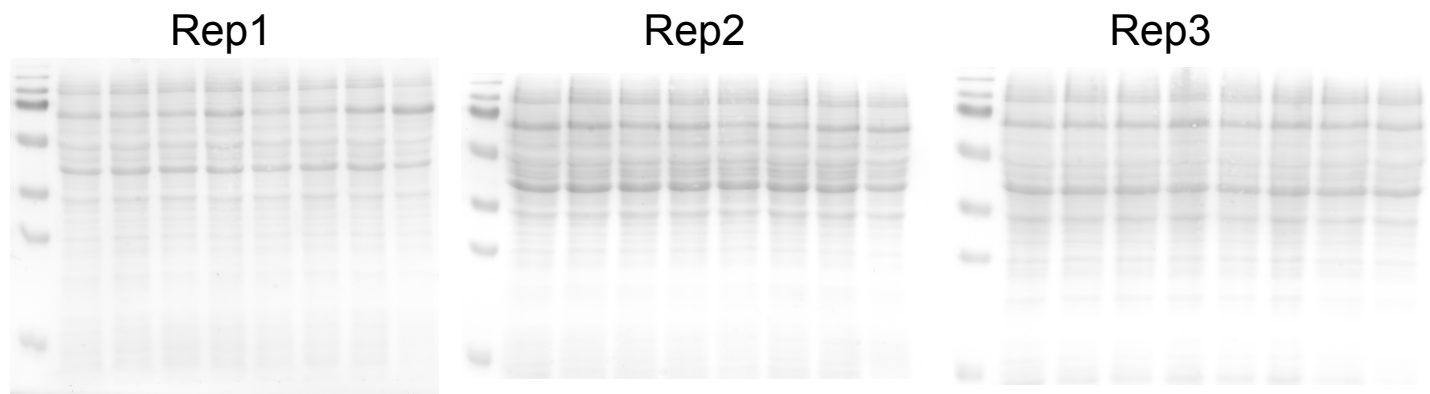

 used for figure  used for quantification

Figure 4 - figure supplement 1 Western blots

2A

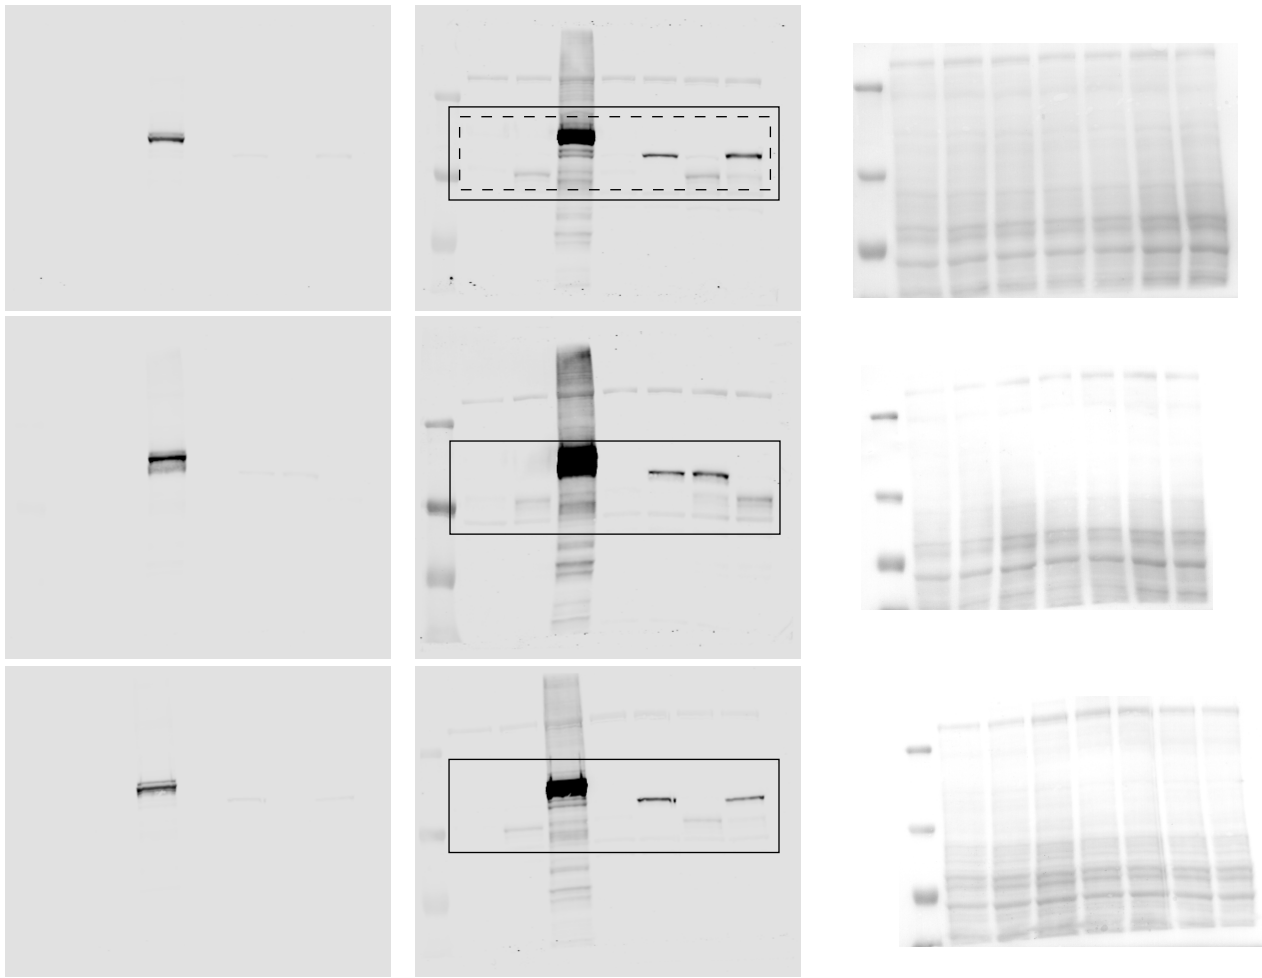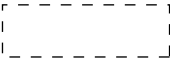

used for figure

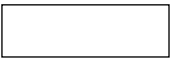

used for quantification

Figure 4 - figure supplement 2 Western blots



2D

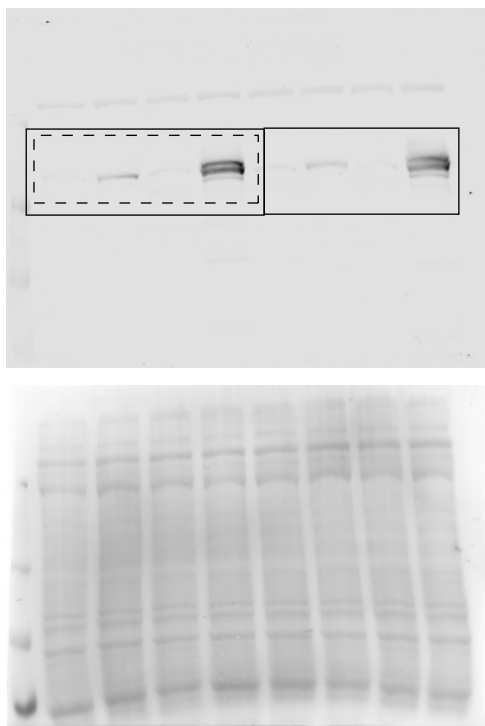

3A

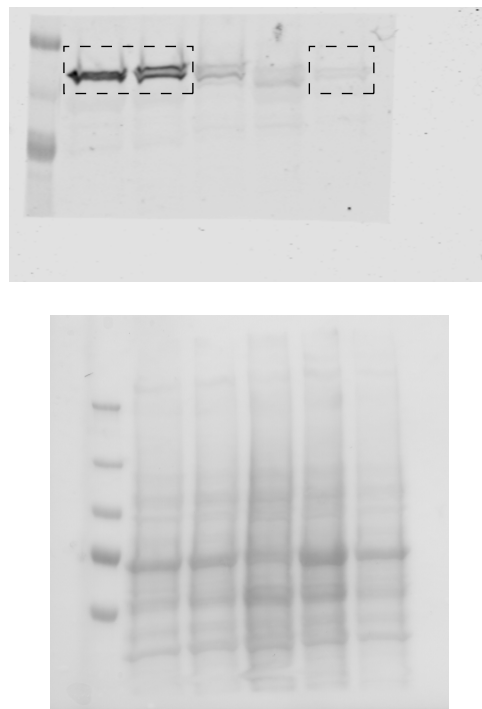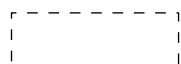

used for figure

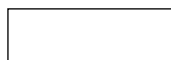

used for quantification

Figure 4 - figure supplement 2 and 3 Western blots

3C

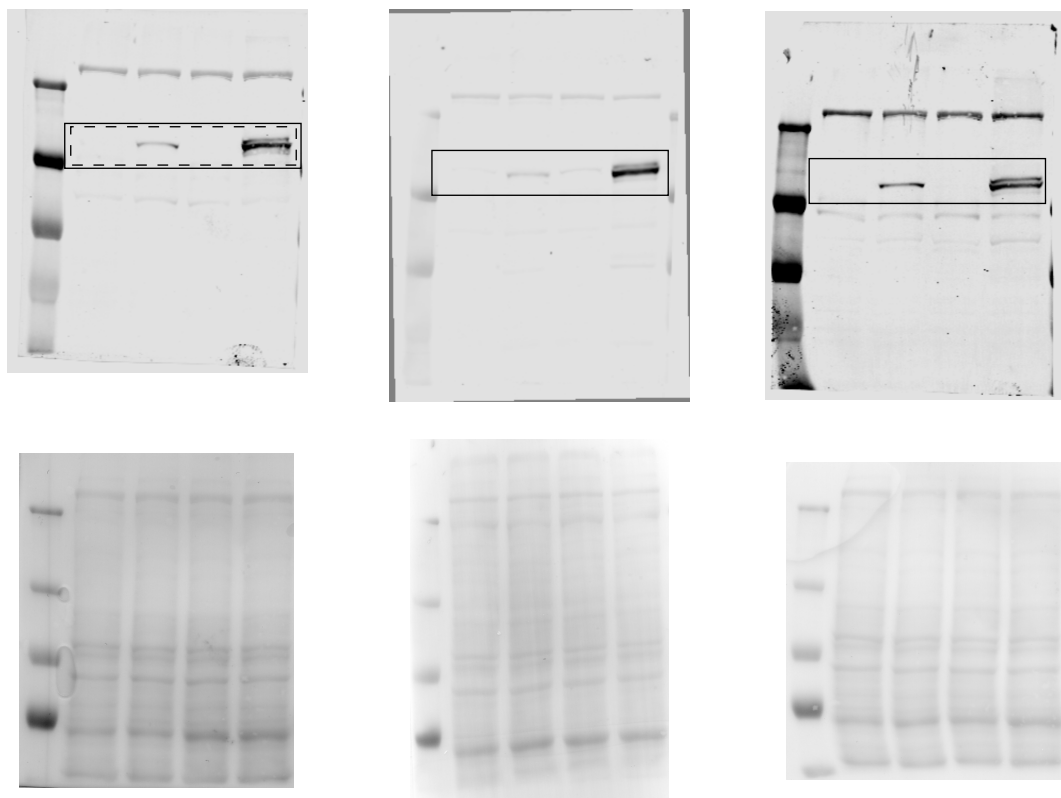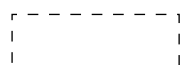

used for figure

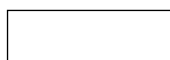

used for quantification

Figure 4 - figure supplement 3 Western blots
