# Supplementary material for: Global cellular response to chemical perturbation of PLK4 activity and abnormal centrosome number
Source: eLife. 2022 Jun 27;11:e73944. doi: 10.7554/eLife.73944 (PMC9236612; doi:10.7554/eLife.73944)
Supplement: Figure 1—figure supplement 1—source data 1. [file elife-73944-fig1-figsupp1-data1.xlsx]

## Sheet: SuppFigure1_1A
Replicate	Condition	Total cells	p21 positive
1	DMSO	463	52
1	200 nM	292	211
1	500 nM	172	166
2	DMSO	560	71
2	200 nM	344	197
2	500 nM	329	240

## Sheet: SuppFigure1_1B
Replicate	Condition	Total cells	p53 positive	Total cells	No CEP135
1	DMSO	574	5	661	3
1	200 nM	678	199	435	78
1	500 nM	544	286	362	195
2	DMSO	317	3	317	1
2	200 nM	315	220	315	20
2	500 nM	410	218	410	179
** different images were scored for p53 and CEP135 for replicate 1

## Sheet: SuppFigure1_1D
Replicate	CEP135 foci	DMSO	200 nM	500 nM
1	0	1	8	59
1	1	8	7	43
1	2	75	20	1
1	3	3	23	0
1	4+	4	51	0
2	0	2	0	78
2	1	23	6	45
2	2	126	23	0
2	3	1	22	0
2	4+	4	34	0
