# Supplementary material for: Global cellular response to chemical perturbation of PLK4 activity and abnormal centrosome number
Source: eLife. 2022 Jun 27;11:e73944. doi: 10.7554/eLife.73944 (PMC9236612; doi:10.7554/eLife.73944)
Supplement: Figure 1—source data 1. [file elife-73944-fig1-data1.xlsx]

## Sheet: Figure1A
Replicate	Technical replicate	Condition	Cell count	Average cell count	Percent Growth
1	1	DMSO	500
1	2	DMSO	510	505	100
1	1	200 nM	15
1	2	200 nM	10	12.5	2.47525
1	1	500 nM	5
1	2	500 nM	20	12.5	2.47525
2	1	DMSO	280
2	2	DMSO	300	290	100
2	1	200 nM	5
2	2	200 nM	0	2.5	0.862069
2	1	500 nM	5
2	2	500 nM	0	2.5	0.862069
3	1	DMSO	890
3	2	DMSO	755	822.5	100
3	1	200 nM	62.5
3	2	200 nM	42.5	52.5	6.38298
3	1	500 nM	17.5
3	2	500 nM	10	13.75	1.67173
