# Supplementary material for: Global cellular response to chemical perturbation of PLK4 activity and abnormal centrosome number
Source: eLife. 2022 Jun 27;11:e73944. doi: 10.7554/eLife.73944 (PMC9236612; doi:10.7554/eLife.73944)
Supplement: Figure 3—figure supplement 1—source data 1. [file elife-73944-fig3-figsupp1-data1.xlsx]

## Sheet: SuppFigure3_1F
Interphase					Mitotic
Replicate	Image	Line	Total TRIM37 intensity		Replicate	Line	Total TRIM37 intensity
1	1	dTRIM37	1.18085		1	WT	52548.1
1	1	dTRIM37	3.02138		1	WT	67833.5
1	1	dTRIM37	8.72435		1	WT	38526.5
1	1	dTRIM37	2.87503		1	WT	50700.2
1	1	dTRIM37	5.49532		1	WT	23969.8
1	1	dTRIM37	4.38068		1	WT	26653.4
1	1	dTRIM37	6.05863		1	WT	24995.2
1	1	dTRIM37	6.83238		1	WT	28362.2
1	1	dTRIM37	2.80798		1	WT	45892.9
1	1	dTRIM37	4.7762		1	WT	50092.3
1	1	dTRIM37	3.03822		1	WT	11882.8
1	2	dTRIM37	2.23064		1	WT	47380.7
1	2	dTRIM37	0.727276		1	WT	10475.1
1	2	dTRIM37	0.498878		1	WT	32833.1
1	2	dTRIM37	0.405432		1	WT	15366.6
1	2	dTRIM37	1.04125		1	dTRIM37	17472.4
1	2	dTRIM37	0.181567		1	dTRIM37	21761.8
1	2	dTRIM37	1.0707		1	dTRIM37	13101.8
1	2	dTRIM37	2.98175		1	dTRIM37	8833.68
1	2	dTRIM37	2.35993		1	dTRIM37	33630.4
1	3	dTRIM37	0.161837		1	dTRIM37	24475.1
1	3	dTRIM37	1.1173		1	dTRIM37	11459
1	3	dTRIM37	0.078996		1	dTRIM37	15650.8
1	3	dTRIM37	4.13478		1	dTRIM37	6316.34
1	3	dTRIM37	2.5538		1	dTRIM37	8559.42
1	3	dTRIM37	2.36327		1	dTRIM37	24139.8
1	3	dTRIM37	0.841856		1	dTRIM37	11106.5
1	3	dTRIM37	3.01682		1	dTRIM37	17653.4
1	3	dTRIM37	1.08823		1	dTRIM37	27812.6
1	3	dTRIM37	2.93452		1	dTRIM37	19051.4
1	3	dTRIM37	1.1344		3	WT	31246.5
1	3	dTRIM37	0.825971		3	WT	26632.2
1	4	dTRIM37	0.306477		3	WT	25705.9
1	4	dTRIM37	2.16489		3	WT	29799.6
1	4	dTRIM37	2.57565		3	WT	32197.4
1	4	dTRIM37	0.933059		3	WT	42593.2
1	4	dTRIM37	4.33529		3	WT	22818.4
1	4	dTRIM37	4.26281		3	WT	28048.6
1	4	dTRIM37	3.71521		3	WT	21627.8
1	4	dTRIM37	2.85687		3	WT	24743.9
1	4	dTRIM37	2.95796		3	WT	32565.1
1	4	dTRIM37	3.80662		3	WT	28231.8
1	4	dTRIM37	0.829801		3	WT	23265
1	5	dTRIM37	1.90632		3	WT	20710.2
1	5	dTRIM37	1.65743		3	WT	26970.9
1	5	dTRIM37	1.96075		3	dTRIM37	25199.7
1	5	dTRIM37	1.06894		3	dTRIM37	16135.7
1	5	dTRIM37	1.15758		3	dTRIM37	21432.7
1	5	dTRIM37	1.55229		3	dTRIM37	12907.8
1	5	dTRIM37	1.53385		3	dTRIM37	19632
1	5	dTRIM37	1.22342		3	dTRIM37	10095.4
1	6	dTRIM37	1.63995		3	dTRIM37	9350.59
1	6	dTRIM37	0.978149		3	dTRIM37	31383.5
1	6	dTRIM37	1.77221		3	dTRIM37	15968.3
1	6	dTRIM37	1.57064		3	dTRIM37	17517.8
1	6	dTRIM37	1.49873		3	dTRIM37	14215.6
1	6	dTRIM37	1.13993		3	dTRIM37	14793.9
1	6	dTRIM37	0.666041		3	dTRIM37	17719.9
1	6	dTRIM37	1.63505		3	dTRIM37	31678
1	6	dTRIM37	0.698329		3	dTRIM37	19564.1
1	6	dTRIM37	1.34031		2	dTRIM37	51260.8
1	7	dTRIM37	1.92251		2	dTRIM37	36705.6
1	7	dTRIM37	1.54385		2	dTRIM37	32731.5
1	7	dTRIM37	3.87309		2	dTRIM37	38693
1	7	dTRIM37	1.26027		2	dTRIM37	31288.8
1	7	dTRIM37	1.37861		2	dTRIM37	13461
1	7	dTRIM37	1.49342		2	dTRIM37	38023.2
1	7	dTRIM37	1.04833		2	dTRIM37	20549.4
1	7	dTRIM37	1.13568		2	dTRIM37	12704.6
1	7	dTRIM37	0.533257		2	dTRIM37	38328.2
1	8	dTRIM37	10.2679		2	dTRIM37	17751.8
1	8	dTRIM37	6.34501		2	dTRIM37	10070.4
1	8	dTRIM37	3.9599		2	dTRIM37	40016.7
1	8	dTRIM37	3.92499		2	dTRIM37	31788.6
1	8	dTRIM37	3.73918		2	dTRIM37	38563.7
1	8	dTRIM37	0.859174		2	WT	36241.8
1	8	dTRIM37	1.64404		2	WT	35995.5
1	8	dTRIM37	2.04135		2	WT	20461.4
1	8	dTRIM37	3.37063		2	WT	42983.3
1	9	dTRIM37	5.54394		2	WT	31586
1	9	dTRIM37	1.50271		2	WT	53032.3
1	9	dTRIM37	1.00732		2	WT	13286.2
1	9	dTRIM37	2.13835		2	WT	48215.1
1	9	dTRIM37	1.99361		2	WT	49180.3
1	9	dTRIM37	1.94934		2	WT	34940.9
1	9	dTRIM37	4.4573		2	WT	44477.6
1	9	dTRIM37	2.72816		2	WT	43391.5
1	9	dTRIM37	6.04071		2	WT	40142
1	9	dTRIM37	1.64498		2	WT	40032.4
1	9	dTRIM37	0.76965		2	WT	49465.5
1	10	dTRIM37	4.46801
1	10	dTRIM37	0.639353
1	10	dTRIM37	1.4677
1	10	dTRIM37	1.20876
1	10	dTRIM37	2.00903
1	10	dTRIM37	0.651438
1	10	dTRIM37	0.56762
1	10	dTRIM37	1.14733
1	10	dTRIM37	1.2824
1	11	dTRIM37	1.85159
1	11	dTRIM37	2.21932
1	11	dTRIM37	8.21532
1	11	dTRIM37	1.97343
1	11	dTRIM37	1.22751
1	11	dTRIM37	0.841733
1	11	dTRIM37	2.13483
1	11	dTRIM37	0.322835
1	11	dTRIM37	0.590082
1	11	dTRIM37	2.90031
1	11	dTRIM37	2.50384
1	11	dTRIM37	1.00073
1	12	dTRIM37	3.6334
1	12	dTRIM37	5.62947
1	12	dTRIM37	2.57652
1	12	dTRIM37	1.48763
1	12	dTRIM37	2.61061
1	12	dTRIM37	2.31595
1	12	dTRIM37	5.96603
1	12	dTRIM37	2.07402
1	12	dTRIM37	3.66755
1	12	dTRIM37	10.0241
1	13	dTRIM37	0.359152
1	13	dTRIM37	5.432
1	13	dTRIM37	6.50733
1	13	dTRIM37	3.74525
1	13	dTRIM37	3.85545
1	13	dTRIM37	3.4481
1	13	dTRIM37	2.68421
1	13	dTRIM37	3.67024
1	14	dTRIM37	0.935805
1	14	dTRIM37	2.28727
1	14	dTRIM37	0.849683
1	14	dTRIM37	1.73071
1	14	dTRIM37	1.41468
1	14	dTRIM37	1.06879
1	14	dTRIM37	1.83029
1	14	dTRIM37	0.943191
1	14	dTRIM37	0.650568
1	14	dTRIM37	2.27329
1	14	dTRIM37	0.914565
1	15	dTRIM37	0.317815
1	15	dTRIM37	0.176211
1	15	dTRIM37	1.7216
1	15	dTRIM37	1.58367
1	15	dTRIM37	0.203189
1	15	dTRIM37	3.1073
1	15	dTRIM37	4.6764
1	15	dTRIM37	2.61579
1	15	dTRIM37	0.532753
1	15	dTRIM37	0.466209
1	15	dTRIM37	1.1937
1	15	dTRIM37	1.33399
1	15	dTRIM37	2.13985
1	15	dTRIM37	0.749477
1	16	dTRIM37	1.22713
1	16	dTRIM37	1.32547
1	16	dTRIM37	1.24205
1	16	dTRIM37	2.96574
1	16	dTRIM37	2.36565
1	16	dTRIM37	3.13643
1	16	dTRIM37	1.59054
1	16	dTRIM37	1.76248
1	16	dTRIM37	1.76983
1	16	dTRIM37	4.36295
1	16	dTRIM37	1.09393
1	17	dTRIM37	1.08324
1	17	dTRIM37	0.056672
1	17	dTRIM37	1.45167
1	17	dTRIM37	0.527504
1	17	dTRIM37	0.257862
1	17	dTRIM37	1.19579
1	17	dTRIM37	1.16796
1	17	dTRIM37	1.11308
1	17	dTRIM37	0.413367
1	17	dTRIM37	1.26836
1	17	dTRIM37	0.758755
1	17	dTRIM37	0.965133
1	17	dTRIM37	0.688212
1	17	dTRIM37	2.46372
1	17	dTRIM37	1.3713
1	18	dTRIM37	2.24343
1	18	dTRIM37	0.939803
1	18	dTRIM37	2.8497
1	18	dTRIM37	7.54543
1	18	dTRIM37	4.62623
1	18	dTRIM37	1.07681
1	18	dTRIM37	2.77826
1	18	dTRIM37	0.11313
1	18	dTRIM37	5.108
1	18	dTRIM37	2.05374
1	19	dTRIM37	8.10874
1	19	dTRIM37	3.09783
1	19	dTRIM37	1.64602
1	19	dTRIM37	1.12309
1	19	dTRIM37	0.878126
1	19	dTRIM37	3.24115
1	19	dTRIM37	3.48714
1	20	dTRIM37	6.23531
1	20	dTRIM37	2.40085
1	20	dTRIM37	1.77201
1	20	dTRIM37	3.84097
1	20	dTRIM37	3.07005
1	20	dTRIM37	0.465904
1	20	dTRIM37	2.56469
1	20	dTRIM37	2.36326
1	20	dTRIM37	0.220371
1	20	dTRIM37	1.77327
1	20	dTRIM37	2.38015
1	20	dTRIM37	2.72306
1	21	WT	2.53222
1	21	WT	6.07762
1	21	WT	12.1878
1	21	WT	6.26227
1	21	WT	13.7315
1	21	WT	9.91522
1	21	WT	5.99922
1	21	WT	8.64643
1	21	WT	9.11324
1	22	WT	2.95975
1	22	WT	1.7314
1	22	WT	3.46307
1	22	WT	2.95242
1	22	WT	3.56365
1	22	WT	1.32335
1	22	WT	0.303441
1	22	WT	4.23676
1	22	WT	2.25394
1	23	WT	2.77627
1	23	WT	2.70835
1	23	WT	2.82097
1	23	WT	1.90428
1	23	WT	3.61846
1	23	WT	4.73178
1	23	WT	3.84492
1	23	WT	2.79074
1	23	WT	2.31395
1	23	WT	3.52255
1	23	WT	2.23941
1	23	WT	0.816297
1	23	WT	2.29734
1	23	WT	1.58909
1	23	WT	2.37755
1	23	WT	5.56997
1	24	WT	3.29525
1	24	WT	0.133318
1	24	WT	2.95831
1	24	WT	1.2365
1	24	WT	2.22762
1	24	WT	1.93564
1	24	WT	2.38303
1	24	WT	1.56432
1	24	WT	3.56902
1	24	WT	2.26067
1	24	WT	2.55781
1	24	WT	0.282841
1	24	WT	0.973632
1	24	WT	1.80742
1	25	WT	8.53915
1	25	WT	12.718
1	25	WT	7.66139
1	25	WT	8.59052
1	25	WT	8.87259
1	25	WT	9.22406
1	25	WT	6.95726
1	25	WT	6.2592
1	25	WT	11.0176
1	25	WT	4.6695
1	25	WT	4.30802
1	25	WT	5.3252
1	26	WT	10.2457
1	26	WT	9.06763
1	26	WT	5.50048
1	26	WT	10.3388
1	26	WT	5.44318
1	26	WT	11.5587
1	26	WT	9.25118
1	26	WT	8.09253
1	26	WT	6.00172
1	26	WT	4.14253
1	26	WT	9.8949
1	26	WT	3.84804
1	26	WT	3.50056
1	27	WT	8.68341
1	27	WT	4.78231
1	27	WT	8.70405
1	27	WT	4.08434
1	27	WT	10.504
1	27	WT	7.58767
1	27	WT	12.8976
1	27	WT	2.04228
1	27	WT	4.41123
1	27	WT	9.1256
1	28	WT	3.6136
1	28	WT	3.2257
1	28	WT	3.32189
1	28	WT	4.36207
1	28	WT	2.94388
1	28	WT	2.98799
1	28	WT	3.55122
1	28	WT	5.9619
1	28	WT	1.06371
1	28	WT	5.41537
1	28	WT	2.00372
1	28	WT	0.919982
1	28	WT	2.30495
1	29	WT	11.5868
1	29	WT	5.12537
1	29	WT	9.01236
1	29	WT	5.9859
1	29	WT	4.61958
1	29	WT	4.42669
1	29	WT	12.0566
1	29	WT	2.7769
1	29	WT	6.04637
1	29	WT	6.4565
1	29	WT	7.35171
1	29	WT	4.32482
1	30	WT	5.69735
1	30	WT	5.52441
1	30	WT	5.6531
1	30	WT	3.54151
1	30	WT	1.59449
1	30	WT	5.34708
1	30	WT	1.34008
1	30	WT	3.74636
1	30	WT	2.74728
1	30	WT	5.6397
1	30	WT	3.92117
1	30	WT	3.30201
1	30	WT	4.30491
1	31	WT	10.0502
1	31	WT	10.522
1	31	WT	7.85661
1	31	WT	8.58167
1	31	WT	8.00926
1	31	WT	6.80063
1	31	WT	9.54199
1	31	WT	4.39297
1	32	WT	6.89406
1	32	WT	7.34316
1	32	WT	3.58282
1	32	WT	6.45899
1	32	WT	8.00902
1	32	WT	6.30101
1	32	WT	8.7843
1	32	WT	4.84326
1	32	WT	4.16483
1	32	WT	4.0036
1	33	WT	8.06392
1	33	WT	7.31252
1	33	WT	11.6475
1	33	WT	7.01903
1	33	WT	5.67251
1	33	WT	10.8454
1	33	WT	7.27683
1	33	WT	10.1106
1	33	WT	10.2483
1	33	WT	5.47317
1	33	WT	6.21527
1	33	WT	9.02867
1	34	WT	5.02029
1	34	WT	6.6968
1	34	WT	4.90253
1	34	WT	1.44433
1	34	WT	0.755566
1	34	WT	1.93036
1	34	WT	4.01395
1	34	WT	3.83734
1	34	WT	4.80368
1	35	WT	7.2819
1	35	WT	7.39817
1	35	WT	0.408377
1	35	WT	5.53083
1	35	WT	7.98126
1	35	WT	4.47964
1	35	WT	6.51257
1	35	WT	8.01572
1	35	WT	9.40423
1	35	WT	12.0588
1	36	WT	3.89865
1	36	WT	4.1826
1	36	WT	3.82284
1	36	WT	3.13512
1	36	WT	4.05023
1	36	WT	1.65562
1	36	WT	4.49538
1	36	WT	2.04675
1	36	WT	0.234501
1	36	WT	4.44532
1	36	WT	4.97368
1	36	WT	3.37575
1	37	WT	8.64024
1	37	WT	0.284901
1	37	WT	11.7023
1	37	WT	3.19582
1	37	WT	3.83784
1	37	WT	7.90887
1	37	WT	7.16538
1	37	WT	10.2055
1	37	WT	6.55637
1	37	WT	3.9075
1	38	WT	10.1791
1	38	WT	7.68356
1	38	WT	10.402
1	38	WT	13.8304
1	38	WT	9.08545
1	38	WT	4.99152
1	38	WT	5.47131
1	38	WT	7.03343
1	38	WT	13.3762
1	39	WT	11.0394
1	39	WT	9.40472
1	39	WT	2.90471
1	39	WT	9.74437
1	39	WT	8.71441
1	39	WT	6.65534
1	39	WT	8.38294
1	39	WT	7.49349
1	39	WT	5.066
1	39	WT	10.1805
1	39	WT	15.8676
1	39	WT	4.2992
1	39	WT	7.45219
1	40	WT	8.15772
1	40	WT	10.455
1	40	WT	7.11846
1	40	WT	11.4255
1	40	WT	4.29781
1	40	WT	8.78433
1	40	WT	7.50761
1	40	WT	6.02106
1	40	WT	9.62222
1	40	WT	3.91667
1	40	WT	10.0658
1	40	WT	12.179
1	40	WT	6.75024
1	40	WT	9.34066
2	1	dTRIM37	2.92091
2	1	dTRIM37	1.59832
2	1	dTRIM37	6.09165
2	1	dTRIM37	2.53407
2	1	dTRIM37	2.04112
2	1	dTRIM37	2.1709
2	1	dTRIM37	0.353719
2	1	dTRIM37	0.139208
2	1	dTRIM37	2.38419
2	1	dTRIM37	1.49139
2	1	dTRIM37	2.10913
2	1	dTRIM37	1.46604
2	1	dTRIM37	0.228092
2	1	dTRIM37	3.39985
2	1	dTRIM37	0.0729839
2	2	dTRIM37	0.357305
2	2	dTRIM37	0.231205
2	2	dTRIM37	5.28229
2	2	dTRIM37	5.49351
2	2	dTRIM37	2.45661
2	2	dTRIM37	3.39393
2	2	dTRIM37	0.197024
2	2	dTRIM37	2.68736
2	2	dTRIM37	3.17594
2	2	dTRIM37	0.552621
2	2	dTRIM37	3.85432
2	2	dTRIM37	4.56942
2	2	dTRIM37	2.59083
2	2	dTRIM37	1.91148
2	2	dTRIM37	0.419989
2	2	dTRIM37	0.572198
2	3	dTRIM37	13.3342
2	3	dTRIM37	10.7474
2	3	dTRIM37	3.55434
2	3	dTRIM37	11.4642
2	3	dTRIM37	7.81677
2	3	dTRIM37	0.316838
2	3	dTRIM37	1.01569
2	3	dTRIM37	9.24591
2	3	dTRIM37	6.89004
2	3	dTRIM37	7.43705
2	4	dTRIM37	4.73083
2	4	dTRIM37	5.24425
2	4	dTRIM37	5.2976
2	4	dTRIM37	6.56739
2	4	dTRIM37	12.6528
2	4	dTRIM37	8.03998
2	4	dTRIM37	0.983185
2	4	dTRIM37	9.2833
2	4	dTRIM37	8.18042
2	4	dTRIM37	0.576715
2	4	dTRIM37	9.12886
2	4	dTRIM37	1.09448
2	4	dTRIM37	14.3082
2	4	dTRIM37	0.951232
2	4	dTRIM37	1.75433
2	4	dTRIM37	5.79547
2	5	dTRIM37	7.38218
2	5	dTRIM37	8.00371
2	5	dTRIM37	2.72193
2	5	dTRIM37	7.37363
2	5	dTRIM37	8.66671
2	5	dTRIM37	7.72314
2	5	dTRIM37	7.62802
2	5	dTRIM37	3.56823
2	5	dTRIM37	13.0056
2	5	dTRIM37	14.0576
2	5	dTRIM37	0.54873
2	5	dTRIM37	1.10559
2	5	dTRIM37	4.05293
2	5	dTRIM37	3.30394
2	6	dTRIM37	4.70536
2	6	dTRIM37	5.74014
2	6	dTRIM37	1.00793
2	6	dTRIM37	0.807568
2	6	dTRIM37	0.888655
2	6	dTRIM37	4.65353
2	6	dTRIM37	8.47544
2	6	dTRIM37	7.94218
2	6	dTRIM37	2.44231
2	6	dTRIM37	10.8875
2	6	dTRIM37	0.480369
2	6	dTRIM37	2.0501
2	6	dTRIM37	4.75169
2	6	dTRIM37	3.8209
2	6	dTRIM37	4.71395
2	6	dTRIM37	1.99757
2	6	dTRIM37	1.63667
2	6	dTRIM37	4.2979
2	6	dTRIM37	15.112
2	6	dTRIM37	8.78759
2	6	dTRIM37	1.73901
2	6	dTRIM37	4.22309
2	6	dTRIM37	1.12222
2	6	dTRIM37	0.225895
2	6	dTRIM37	5.49458
2	7	dTRIM37	0.0394904
2	7	dTRIM37	12.5368
2	7	dTRIM37	0.0741741
2	7	dTRIM37	0.842939
2	7	dTRIM37	2.41151
2	7	dTRIM37	2.71818
2	7	dTRIM37	3.72065
2	7	dTRIM37	0.767575
2	7	dTRIM37	3.22725
2	7	dTRIM37	3.42875
2	7	dTRIM37	0.279103
2	7	dTRIM37	0.0868849
2	7	dTRIM37	0.137926
2	7	dTRIM37	3.16228
2	7	dTRIM37	2.99509
2	7	dTRIM37	4.19161
2	7	dTRIM37	0.0343328
2	8	dTRIM37	4.22916
2	8	dTRIM37	7.79214
2	8	dTRIM37	7.15937
2	8	dTRIM37	2.52016
2	8	dTRIM37	7.47922
2	8	dTRIM37	0.37174
2	8	dTRIM37	14.4506
2	8	dTRIM37	5.5033
2	8	dTRIM37	3.33736
2	8	dTRIM37	7.59481
2	8	dTRIM37	4.41738
2	8	dTRIM37	6.70169
2	9	dTRIM37	6.61794
2	9	dTRIM37	0.252552
2	9	dTRIM37	8.29558
2	9	dTRIM37	0.680186
2	9	dTRIM37	4.47785
2	9	dTRIM37	0.104158
2	9	dTRIM37	7.78582
2	9	dTRIM37	2.53092
2	9	dTRIM37	9.2883
2	9	dTRIM37	2.60322
2	9	dTRIM37	0.147097
2	9	dTRIM37	0.397681
2	10	dTRIM37	0.240146
2	10	dTRIM37	4.0067
2	10	dTRIM37	3.9095
2	10	dTRIM37	0.908583
2	10	dTRIM37	2.14299
2	10	dTRIM37	5.10355
2	10	dTRIM37	2.4466
2	10	dTRIM37	1.9339
2	10	dTRIM37	3.06098
2	10	dTRIM37	4.50254
2	10	dTRIM37	2.75789
2	10	dTRIM37	2.11331
2	11	dTRIM37	0.5552
2	11	dTRIM37	2.65612
2	11	dTRIM37	2.53141
2	11	dTRIM37	0.700206
2	11	dTRIM37	0.758724
2	11	dTRIM37	4.29735
2	11	dTRIM37	2.38123
2	11	dTRIM37	1.7969
2	11	dTRIM37	2.07802
2	11	dTRIM37	2.9599
2	11	dTRIM37	1.82254
2	11	dTRIM37	14.9284
2	11	dTRIM37	3.29586
2	11	dTRIM37	2.5698
2	11	dTRIM37	3.31456
2	11	dTRIM37	0.565621
2	11	dTRIM37	1.56934
2	11	dTRIM37	2.65245
2	12	dTRIM37	3.27742
2	12	dTRIM37	9.90872
2	12	dTRIM37	5.07845
2	12	dTRIM37	7.57743
2	12	dTRIM37	2.10451
2	12	dTRIM37	7.28482
2	12	dTRIM37	2.56397
2	12	dTRIM37	4.24779
2	12	dTRIM37	4.70631
2	12	dTRIM37	11.155
2	12	dTRIM37	7.53079
2	12	dTRIM37	2.40368
2	12	dTRIM37	9.09215
2	12	dTRIM37	2.18779
2	13	dTRIM37	2.6732
2	13	dTRIM37	0.795819
2	13	dTRIM37	1.4883
2	14	dTRIM37	1.21073
2	14	dTRIM37	0.154467
2	14	dTRIM37	0.617624
2	14	dTRIM37	0.433524
2	14	dTRIM37	6.54395
2	14	dTRIM37	5.54391
2	14	dTRIM37	3.81845
2	14	dTRIM37	0.19649
2	14	dTRIM37	12.0539
2	14	dTRIM37	2.11142
2	14	dTRIM37	2.61765
2	14	dTRIM37	2.47465
2	14	dTRIM37	0.307378
2	14	dTRIM37	0.2009
2	14	dTRIM37	11.3712
2	14	dTRIM37	1.46207
2	14	dTRIM37	4.73918
2	14	dTRIM37	1.4663
2	15	dTRIM37	0.261646
2	15	dTRIM37	0.295033
2	15	dTRIM37	21.1577
2	15	dTRIM37	11.1406
2	15	dTRIM37	0.181888
2	15	dTRIM37	9.69543
2	15	dTRIM37	4.83056
2	15	dTRIM37	1.07875
2	15	dTRIM37	6.88888
2	15	dTRIM37	7.1622
2	15	dTRIM37	0.102434
2	15	dTRIM37	7.34513
2	15	dTRIM37	5.28998
2	16	dTRIM37	8.27242
2	16	dTRIM37	0.843824
2	16	dTRIM37	0.59704
2	16	dTRIM37	6.06979
2	16	dTRIM37	11.5494
2	16	dTRIM37	10.845
2	16	dTRIM37	5.98808
2	16	dTRIM37	6.08536
2	16	dTRIM37	0.638972
2	16	dTRIM37	0.858671
2	16	dTRIM37	0.58735
2	16	dTRIM37	4.29265
2	16	dTRIM37	1.93965
2	16	dTRIM37	2.80182
2	16	dTRIM37	7.48052
2	16	dTRIM37	8.94414
2	16	dTRIM37	6.29767
2	16	dTRIM37	0.485481
2	16	dTRIM37	3.46532
2	17	dTRIM37	7.9393
2	17	dTRIM37	6.15427
2	17	dTRIM37	1.407
2	17	dTRIM37	10.0339
2	17	dTRIM37	8.83874
2	17	dTRIM37	14.8204
2	17	dTRIM37	0.434806
2	17	dTRIM37	7.96727
2	17	dTRIM37	8.24694
2	17	dTRIM37	10.1292
2	17	dTRIM37	15.5283
2	17	dTRIM37	2.30126
2	17	dTRIM37	15.4033
2	17	dTRIM37	4.8609
2	17	dTRIM37	2.73541
2	18	dTRIM37	1.65095
2	18	dTRIM37	0.753857
2	18	dTRIM37	8.09311
2	18	dTRIM37	0.0697795
2	18	dTRIM37	0.226032
2	18	dTRIM37	2.13007
2	18	dTRIM37	0.473533
2	18	dTRIM37	8.55857
2	18	dTRIM37	0.231464
2	18	dTRIM37	7.61639
2	18	dTRIM37	5.17516
2	18	dTRIM37	0.411612
2	18	dTRIM37	9.74382
2	18	dTRIM37	0.717815
2	18	dTRIM37	9.91894
2	18	dTRIM37	0.59675
2	18	dTRIM37	5.7565
2	19	dTRIM37	6.3178
2	19	dTRIM37	1.12369
2	19	dTRIM37	0.588739
2	19	dTRIM37	0.399008
2	19	dTRIM37	1.60278
2	19	dTRIM37	7.1588
2	19	dTRIM37	7.63247
2	19	dTRIM37	1.59316
2	19	dTRIM37	2.15964
2	19	dTRIM37	4.90198
2	19	dTRIM37	1.50292
2	19	dTRIM37	3.90985
2	19	dTRIM37	5.1069
2	20	dTRIM37	9.5539
2	20	dTRIM37	14.4891
2	20	dTRIM37	0.831327
2	20	dTRIM37	6.52367
2	20	dTRIM37	4.76577
2	20	dTRIM37	7.81978
2	20	dTRIM37	0.875669
2	20	dTRIM37	0.347921
2	20	dTRIM37	0.656092
2	20	dTRIM37	7.05554
2	20	dTRIM37	0.912856
2	20	dTRIM37	1.80327
2	20	dTRIM37	6.88093
2	20	dTRIM37	13.6316
2	20	dTRIM37	0.580682
2	20	dTRIM37	0.63975
2	21	dTRIM37	7.11678
2	21	dTRIM37	8.08038
2	21	dTRIM37	0.684947
2	21	dTRIM37	5.80215
2	21	dTRIM37	5.26119
2	21	dTRIM37	0.540627
2	21	dTRIM37	12.3644
2	21	dTRIM37	0.654917
2	21	dTRIM37	0.432044
2	21	dTRIM37	0.699458
2	21	dTRIM37	11.0129
2	21	dTRIM37	6.54797
2	21	dTRIM37	0.537804
2	21	dTRIM37	7.11766
2	21	dTRIM37	4.71716
2	22	dTRIM37	0.83032
2	22	dTRIM37	4.7028
2	22	dTRIM37	2.83005
2	22	dTRIM37	3.02679
2	22	dTRIM37	4.53271
2	22	dTRIM37	3.38105
2	22	dTRIM37	3.08688
2	22	dTRIM37	11.8863
2	22	dTRIM37	5.58335
2	22	dTRIM37	0.933074
2	22	dTRIM37	2.86436
2	22	dTRIM37	2.87727
2	22	dTRIM37	2.54562
2	22	dTRIM37	3.28899
2	23	dTRIM37	1.06731
2	23	dTRIM37	2.18073
2	23	dTRIM37	6.1695
2	23	dTRIM37	4.42202
2	23	dTRIM37	3.45867
2	23	dTRIM37	3.41355
2	23	dTRIM37	6.24721
2	23	dTRIM37	2.03326
2	23	dTRIM37	3.73196
2	23	dTRIM37	0.227893
2	23	dTRIM37	0.450523
2	23	dTRIM37	3.39698
2	24	dTRIM37	1.2096
2	24	dTRIM37	1.09633
2	24	dTRIM37	1.95557
2	24	dTRIM37	1.38918
2	24	dTRIM37	0.82475
2	24	dTRIM37	1.89416
2	24	dTRIM37	1.42538
2	24	dTRIM37	1.00143
2	24	dTRIM37	2.17699
2	24	dTRIM37	0.934691
2	25	dTRIM37	8.0453
2	25	dTRIM37	0.462699
2	25	dTRIM37	7.96753
2	25	dTRIM37	0.582742
2	25	dTRIM37	0.345144
2	25	dTRIM37	1.0135
2	25	dTRIM37	0.105333
2	25	dTRIM37	0.596536
2	25	dTRIM37	0.542672
2	25	dTRIM37	6.00414
2	25	dTRIM37	5.68605
2	25	dTRIM37	18.8342
2	25	dTRIM37	7.40867
2	25	dTRIM37	0.494118
2	25	dTRIM37	6.94736
2	26	dTRIM37	0.284901
2	26	dTRIM37	2.50066
2	26	dTRIM37	3.71017
2	26	dTRIM37	9.73278
2	26	dTRIM37	2.95534
2	26	dTRIM37	0.267582
2	26	dTRIM37	3.31891
2	26	dTRIM37	3.91635
2	26	dTRIM37	0.115999
2	26	dTRIM37	4.44866
2	26	dTRIM37	4.16252
2	26	dTRIM37	1.63838
2	27	dTRIM37	1.86703
2	27	dTRIM37	0.113878
2	27	dTRIM37	5.22106
2	27	dTRIM37	0.194446
2	27	dTRIM37	4.4632
2	27	dTRIM37	0.149462
2	27	dTRIM37	2.94615
2	27	dTRIM37	2.05284
2	27	dTRIM37	1.35056
2	27	dTRIM37	0.48484
2	27	dTRIM37	3.09761
2	27	dTRIM37	3.21308
2	27	dTRIM37	3.23348
2	27	dTRIM37	2.44907
2	27	dTRIM37	11.8252
2	28	dTRIM37	1.1584
2	28	dTRIM37	0.207187
2	28	dTRIM37	8.90382
2	28	dTRIM37	0.959609
2	28	dTRIM37	4.8388
2	28	dTRIM37	5.96555
2	28	dTRIM37	0.166491
2	28	dTRIM37	3.16342
2	28	dTRIM37	7.94797
2	28	dTRIM37	10.159
2	28	dTRIM37	0.948226
2	28	dTRIM37	0.124193
2	28	dTRIM37	13.1412
2	28	dTRIM37	11.1732
2	28	dTRIM37	11.4263
2	28	dTRIM37	1.41985
2	29	dTRIM37	0.182559
2	29	dTRIM37	0.129671
2	29	dTRIM37	2.92029
2	29	dTRIM37	2.69322
2	29	dTRIM37	3.41895
2	29	dTRIM37	0.177569
2	29	dTRIM37	0.350439
2	29	dTRIM37	1.5776
2	29	dTRIM37	5.02779
2	29	dTRIM37	4.03664
2	29	dTRIM37	3.48342
2	29	dTRIM37	1.63737
2	29	dTRIM37	0.760479
2	29	dTRIM37	6.43397
2	29	dTRIM37	2.61125
2	29	dTRIM37	7.37366
2	29	dTRIM37	0.593652
2	29	dTRIM37	6.81527
2	30	dTRIM37	0.0843977
2	30	dTRIM37	3.63238
2	30	dTRIM37	0.204211
2	30	dTRIM37	1.05589
2	30	dTRIM37	2.01643
2	30	dTRIM37	0.0164492
2	30	dTRIM37	1.8249
2	30	dTRIM37	5.12119
2	30	dTRIM37	3.76535
2	30	dTRIM37	1.92743
2	30	dTRIM37	2.79396
2	30	dTRIM37	2.04826
2	30	dTRIM37	0.165698
2	30	dTRIM37	8.11974
2	31	WT	8.66871
2	31	WT	0.307286
2	31	WT	9.69259
2	31	WT	8.19051
2	31	WT	9.77111
2	31	WT	13.4962
2	31	WT	10.6002
2	31	WT	10.5777
2	31	WT	9.92125
2	31	WT	9.94702
2	31	WT	10.032
2	31	WT	5.54067
2	32	WT	0.62002
2	32	WT	1.10208
2	32	WT	10.5648
2	32	WT	3.28875
2	32	WT	14.518
2	32	WT	0.865522
2	32	WT	7.40212
2	32	WT	7.33797
2	32	WT	14.3633
2	32	WT	15.2468
2	32	WT	11.1225
2	32	WT	10.3967
2	32	WT	8.51885
2	32	WT	10.5496
2	32	WT	6.89606
2	32	WT	9.97858
2	33	WT	12.575
2	33	WT	22.4356
2	33	WT	2.86079
2	33	WT	12.5722
2	33	WT	11.2133
2	33	WT	1.26947
2	33	WT	9.32616
2	33	WT	2.9117
2	33	WT	10.1086
2	33	WT	14.5363
2	33	WT	11.9803
2	33	WT	13.9996
2	33	WT	14.2075
2	33	WT	0.229328
2	33	WT	11.359
2	33	WT	12.4837
2	33	WT	4.77496
2	33	WT	10.5574
2	34	WT	9.88943
2	34	WT	0.346868
2	34	WT	12.6047
2	34	WT	9.73112
2	34	WT	1.89908
2	34	WT	12.3588
2	34	WT	10.347
2	34	WT	10.4232
2	34	WT	0.529168
2	34	WT	0.38471
2	34	WT	4.2735
2	35	WT	0.168978
2	35	WT	12.8881
2	35	WT	14.7223
2	35	WT	14.3281
2	35	WT	2.12801
2	35	WT	1.66184
2	35	WT	2.25423
2	35	WT	1.68331
2	35	WT	6.98279
2	35	WT	9.97949
2	35	WT	0.13431
2	35	WT	8.50953
2	35	WT	19.0334
2	35	WT	8.79306
2	35	WT	8.41082
2	35	WT	3.25028
2	35	WT	4.22327
2	36	WT	6.29181
2	36	WT	7.63416
2	36	WT	0.0644999
2	36	WT	4.1776
2	36	WT	4.34127
2	36	WT	5.22623
2	36	WT	4.99214
2	36	WT	7.66789
2	36	WT	0.0757916
2	36	WT	7.71064
2	36	WT	8.14905
2	37	WT	16.6755
2	37	WT	0.631922
2	37	WT	3.85292
2	37	WT	15.5593
2	37	WT	22.1915
2	37	WT	14.9955
2	37	WT	14.582
2	37	WT	9.97261
2	37	WT	8.37362
2	37	WT	8.89738
2	38	WT	0.705089
2	38	WT	11.1545
2	38	WT	0.79118
2	38	WT	0.192432
2	38	WT	14.8494
2	38	WT	10.8753
2	38	WT	4.04987
2	38	WT	10.8599
2	38	WT	0.446723
2	38	WT	0.44509
2	38	WT	15.5138
2	38	WT	2.41566
2	38	WT	2.1899
2	38	WT	0.132097
2	38	WT	1.02846
2	38	WT	14.0313
2	38	WT	0.61854
2	38	WT	10.3821
2	38	WT	12.3549
2	38	WT	3.45605
2	38	WT	7.76149
2	38	WT	10.3414
2	38	WT	2.08109
2	39	WT	13.9507
2	39	WT	1.08679
2	39	WT	0.365393
2	39	WT	16.0781
2	39	WT	16.2052
2	39	WT	13.7236
2	39	WT	1.37287
2	39	WT	11.802
2	39	WT	1.95315
2	39	WT	12.1832
2	39	WT	8.74336
2	39	WT	12.1136
2	39	WT	18.4087
2	40	WT	0.191394
2	40	WT	0.847745
2	40	WT	0.595499
2	40	WT	14.1042
2	40	WT	9.94331
2	40	WT	9.85008
2	40	WT	11.7033
2	40	WT	19.1266
2	40	WT	14.6292
2	40	WT	1.34382
2	40	WT	18.8873
2	40	WT	0.321828
2	40	WT	14.1287
2	40	WT	17.1048
2	40	WT	8.58482
2	41	WT	11.6528
2	41	WT	10.3535
2	41	WT	14.9704
2	41	WT	1.2728
2	41	WT	14.9529
2	41	WT	0.370092
2	41	WT	16.4103
2	41	WT	20.3739
2	41	WT	0.60061
2	42	WT	11.4369
2	42	WT	13.7582
2	42	WT	12.3456
2	42	WT	17.074
2	42	WT	1.29143
2	42	WT	9.4414
2	42	WT	12.6664
2	42	WT	16.5187
2	42	WT	13.5344
2	42	WT	14.8486
2	42	WT	9.52696
2	42	WT	14.8745
2	43	WT	4.91336
2	43	WT	15.969
2	43	WT	19.7026
2	43	WT	15.9093
2	43	WT	16.1005
2	43	WT	0.430976
2	43	WT	13.451
2	43	WT	2.7762
2	43	WT	12.4177
2	43	WT	14.2907
2	44	WT	9.05547
2	44	WT	12.7167
2	44	WT	0.426291
2	44	WT	0.245823
2	44	WT	10.8871
2	44	WT	0.415427
2	44	WT	14.5248
2	44	WT	10.0104
2	44	WT	13.3993
2	44	WT	9.4295
2	44	WT	0.199756
2	44	WT	9.01946
2	44	WT	9.1286
2	44	WT	13.4117
2	44	WT	9.99736
2	45	WT	17.3471
2	45	WT	10.6065
2	45	WT	1.36008
2	45	WT	0.510475
2	45	WT	2.65696
2	45	WT	3.22713
2	45	WT	13.089
2	45	WT	0.268101
2	45	WT	10.5071
2	45	WT	10.1182
2	45	WT	12.4391
2	45	WT	15.5039
2	46	WT	9.89587
2	46	WT	0.206287
2	46	WT	15.9252
2	46	WT	0.517906
2	46	WT	2.09857
2	46	WT	4.21967
2	46	WT	2.82789
2	46	WT	13.8107
2	46	WT	5.454
2	46	WT	1.69957
2	46	WT	4.82638
2	46	WT	0.825864
2	46	WT	1.32892
2	46	WT	1.08467
2	46	WT	12.0944
2	46	WT	0.295811
2	46	WT	14.5878
2	46	WT	13.1125
2	46	WT	0.615503
2	46	WT	13.5926
2	46	WT	2.45553
2	46	WT	15.4343
2	46	WT	6.92357
2	47	WT	11.6645
2	47	WT	12.1119
2	47	WT	11.0895
2	47	WT	11.0678
2	47	WT	6.9044
2	47	WT	10.7903
2	47	WT	8.95172
2	47	WT	12.8536
2	47	WT	17.5554
2	47	WT	9.33725
2	47	WT	0.761746
2	48	WT	0.742443
2	48	WT	10.3946
2	48	WT	3.20732
2	48	WT	0.505623
2	48	WT	24.1829
2	48	WT	12.2383
2	48	WT	16.1009
2	48	WT	16.0153
2	48	WT	0.278737
2	48	WT	11.1686
2	48	WT	0.364935
2	48	WT	1.30068
2	48	WT	0.30808
2	48	WT	11.3772
2	48	WT	0.581537
2	49	WT	8.77382
2	49	WT	6.67596
2	49	WT	12.7957
2	49	WT	10.7608
2	49	WT	13.1716
2	49	WT	10.9402
2	49	WT	10.0188
2	49	WT	24.1628
2	49	WT	0.386404
2	49	WT	11.6385
2	49	WT	14.6572
2	49	WT	16.5581
2	49	WT	14.2593
2	49	WT	5.78915
2	50	WT	14.3655
2	50	WT	1.1174
2	50	WT	13.9578
2	50	WT	0.486427
2	50	WT	14.8089
2	50	WT	9.8228
2	50	WT	0.417227
2	50	WT	10.7553
2	50	WT	20.7153
2	50	WT	10.8741
2	50	WT	11.5708
2	50	WT	4.34064
2	50	WT	0.510124
2	50	WT	0.762097
2	50	WT	0.633631
2	50	WT	11.1933
2	50	WT	10.1897
2	51	WT	6.43087
2	51	WT	14.1212
2	51	WT	6.15923
2	51	WT	17.1589
2	51	WT	13.5573
2	51	WT	17.4371
2	51	WT	15.6355
2	51	WT	28.9126
2	51	WT	9.09645
2	51	WT	15.484
2	51	WT	2.34104
2	51	WT	14.5732
2	51	WT	0.516274
2	51	WT	11.4003
2	51	WT	13.8334
2	52	WT	16.9549
2	52	WT	0.146349
2	52	WT	11.8806
2	52	WT	13.2573
2	52	WT	3.78489
2	52	WT	11.4554
2	52	WT	12.3206
2	52	WT	14.9297
2	52	WT	16.3393
2	52	WT	16.4699
2	52	WT	13.6028
2	53	WT	12.3386
2	53	WT	10.9531
2	53	WT	4.22918
2	53	WT	22.4992
2	53	WT	10.9716
2	53	WT	15.2488
2	53	WT	14.8583
2	53	WT	7.4461
2	53	WT	0.850874
2	53	WT	13.2092
2	53	WT	15.1536
2	53	WT	2.64276
2	53	WT	0.327916
2	54	WT	10.24
2	54	WT	17.0215
2	54	WT	12.3779
2	54	WT	2.00148
2	54	WT	17.8736
2	54	WT	9.81375
2	54	WT	11.0123
2	54	WT	6.60046
2	54	WT	4.76612
2	54	WT	12.603
2	54	WT	9.8728
2	54	WT	11.8515
2	54	WT	11.1863
2	54	WT	0.665614
2	54	WT	10.1295
2	54	WT	4.85689
2	55	WT	9.29895
2	55	WT	11.7063
2	55	WT	3.48508
2	55	WT	0.640162
2	55	WT	15.3764
2	55	WT	0.359716
2	55	WT	0.176135
2	55	WT	0.474296
2	55	WT	9.47808
2	55	WT	0.301503
2	55	WT	13.4417
2	55	WT	4.09238
2	55	WT	12.0045
2	55	WT	11.4179
2	55	WT	7.85684
2	55	WT	0.9823
2	55	WT	3.77942
2	55	WT	8.13718
2	56	WT	3.64326
2	56	WT	4.34087
2	56	WT	2.33429
2	56	WT	0.29192
2	56	WT	0.295277
2	56	WT	3.40241
2	56	WT	2.19446
2	56	WT	0.519997
2	56	WT	3.99646
2	56	WT	0.428489
2	56	WT	2.80507
2	56	WT	0.136385
2	56	WT	2.71304
2	56	WT	0.458808
2	56	WT	3.52586
2	56	WT	0.366842
2	57	WT	1.20296
2	57	WT	6.00595
2	57	WT	14.1761
2	57	WT	7.66987
2	57	WT	6.03564
2	57	WT	10.2166
2	57	WT	10.8859
2	57	WT	14.4243
2	57	WT	13.3384
2	57	WT	7.91727
2	57	WT	11.2591
2	57	WT	7.96529
2	57	WT	0.462776
2	57	WT	7.87405
2	57	WT	0.903609
2	58	WT	4.51145
2	58	WT	0.290898
2	58	WT	6.36226
2	58	WT	0.113878
2	58	WT	6.15882
2	58	WT	0.41503
2	58	WT	7.54641
2	58	WT	0.162997
2	58	WT	0.239612
2	58	WT	0.36318
2	58	WT	3.85847
2	58	WT	5.48301
2	58	WT	0.860472
2	58	WT	0.421073
2	58	WT	0.383673
2	58	WT	0.306325
2	58	WT	0.0509957
2	58	WT	0.257328
2	58	WT	4.76541
2	58	WT	0.339895
2	58	WT	6.10385
2	58	WT	0.484123
2	58	WT	5.33878
2	58	WT	0.100023
2	59	WT	6.68646
2	59	WT	7.25684
2	59	WT	4.48193
2	59	WT	4.12084
2	59	WT	5.35595
2	59	WT	6.71527
2	59	WT	7.79918
2	59	WT	4.38225
2	59	WT	7.21921
2	59	WT	5.20433
2	59	WT	5.91089
2	59	WT	7.33075
2	59	WT	3.87057
2	60	WT	19.5131
2	60	WT	10.4077
2	60	WT	0.248341
2	60	WT	17.1079
2	60	WT	12.6895
2	60	WT	17.3533
2	60	WT	0.339742
2	60	WT	8.35328
2	60	WT	14.1833
2	60	WT	1.14464
2	60	WT	0.439216
2	60	WT	0.299046
2	60	WT	4.88769
2	60	WT	7.1481
2	61	WT	13.4179
2	61	WT	11.0418
2	61	WT	7.24067
2	61	WT	17.3542
2	61	WT	9.53684
2	61	WT	8.50706
2	61	WT	3.66505
2	61	WT	1.88505
2	61	WT	3.80955
2	61	WT	6.38534
2	61	WT	0.101427
2	61	WT	10.5197
2	61	WT	10.3567
2	61	WT	10.7565
2	61	WT	11.4349
3	1	dTRIM37	6.24536
3	1	dTRIM37	2.43108
3	1	dTRIM37	6.00806
3	1	dTRIM37	1.08818
3	1	dTRIM37	6.08746
3	1	dTRIM37	5.4987
3	1	dTRIM37	2.39094
3	1	dTRIM37	4.07634
3	1	dTRIM37	3.43833
3	1	dTRIM37	2.63651
3	1	dTRIM37	13.3195
3	2	dTRIM37	3.39496
3	2	dTRIM37	3.09483
3	2	dTRIM37	3.45646
3	2	dTRIM37	1.28432
3	2	dTRIM37	8.53983
3	2	dTRIM37	2.57966
3	2	dTRIM37	4.2052
3	2	dTRIM37	2.80729
3	2	dTRIM37	5.07816
3	2	dTRIM37	2.19422
3	2	dTRIM37	1.30173
3	2	dTRIM37	2.96599
3	2	dTRIM37	4.20667
3	3	dTRIM37	5.61537
3	3	dTRIM37	4.39037
3	3	dTRIM37	2.98227
3	3	dTRIM37	2.87524
3	3	dTRIM37	4.09581
3	3	dTRIM37	3.30617
3	3	dTRIM37	2.14936
3	3	dTRIM37	0.0568246
3	3	dTRIM37	6.78737
3	3	dTRIM37	4.36924
3	4	dTRIM37	4.15021
3	4	dTRIM37	6.12059
3	4	dTRIM37	7.73945
3	4	dTRIM37	4.26331
3	4	dTRIM37	4.11719
3	4	dTRIM37	2.74791
3	4	dTRIM37	4.6358
3	4	dTRIM37	3.31594
3	4	dTRIM37	3.03523
3	4	dTRIM37	2.4784
3	5	dTRIM37	3.21012
3	5	dTRIM37	4.00162
3	5	dTRIM37	6.24323
3	5	dTRIM37	2.87735
3	5	dTRIM37	3.36147
3	5	dTRIM37	3.05327
3	5	dTRIM37	3.31562
3	5	dTRIM37	3.45397
3	5	dTRIM37	4.24781
3	6	dTRIM37	2.67337
3	6	dTRIM37	3.38529
3	6	dTRIM37	5.35294
3	6	dTRIM37	2.55174
3	6	dTRIM37	3.95625
3	6	dTRIM37	5.59135
3	6	dTRIM37	2.18558
3	6	dTRIM37	3.09862
3	6	dTRIM37	7.73048
3	6	dTRIM37	3.67254
3	6	dTRIM37	4.73848
3	6	dTRIM37	3.46146
3	7	dTRIM37	4.14414
3	7	dTRIM37	7.55009
3	7	dTRIM37	5.41135
3	7	dTRIM37	3.24807
3	7	dTRIM37	1.65399
3	7	dTRIM37	3.65956
3	7	dTRIM37	3.20903
3	7	dTRIM37	2.12065
3	7	dTRIM37	6.21582
3	8	dTRIM37	5.54777
3	8	dTRIM37	7.88905
3	8	dTRIM37	2.02139
3	8	dTRIM37	3.14107
3	8	dTRIM37	2.18791
3	8	dTRIM37	1.54829
3	8	dTRIM37	5.95593
3	8	dTRIM37	1.70996
3	8	dTRIM37	3.49313
3	8	dTRIM37	7.58775
3	8	dTRIM37	2.53278
3	8	dTRIM37	7.40703
3	9	dTRIM37	4.63621
3	9	dTRIM37	4.78521
3	9	dTRIM37	3.6569
3	9	dTRIM37	4.69377
3	9	dTRIM37	3.73953
3	9	dTRIM37	4.08403
3	9	dTRIM37	4.31666
3	9	dTRIM37	4.42358
3	9	dTRIM37	4.95506
3	9	dTRIM37	4.98975
3	10	dTRIM37	5.06554
3	10	dTRIM37	5.60293
3	10	dTRIM37	5.0164
3	10	dTRIM37	0.499489
3	10	dTRIM37	2.48251
3	10	dTRIM37	3.65402
3	10	dTRIM37	2.77459
3	10	dTRIM37	2.33671
3	10	dTRIM37	2.15824
3	10	dTRIM37	4.62606
3	10	dTRIM37	2.11467
3	10	dTRIM37	2.16161
3	10	dTRIM37	3.48763
3	10	dTRIM37	2.71675
3	10	dTRIM37	3.90838
3	11	dTRIM37	3.78129
3	11	dTRIM37	7.31937
3	11	dTRIM37	2.95236
3	11	dTRIM37	4.27366
3	11	dTRIM37	2.38729
3	11	dTRIM37	4.19428
3	11	dTRIM37	6.13149
3	11	dTRIM37	2.32963
3	11	dTRIM37	3.53889
3	11	dTRIM37	2.60774
3	12	dTRIM37	3.50372
3	12	dTRIM37	0.166949
3	12	dTRIM37	2.39805
3	12	dTRIM37	7.15143
3	12	dTRIM37	3.54443
3	12	dTRIM37	5.64918
3	12	dTRIM37	2.71142
3	12	dTRIM37	4.02229
3	12	dTRIM37	2.56419
3	12	dTRIM37	2.61405
3	13	dTRIM37	6.17247
3	13	dTRIM37	2.16188
3	13	dTRIM37	2.99307
3	13	dTRIM37	2.95236
3	13	dTRIM37	3.16649
3	13	dTRIM37	1.29642
3	13	dTRIM37	8.34061
3	13	dTRIM37	2.42393
3	13	dTRIM37	3.43528
3	13	dTRIM37	0.979248
3	14	dTRIM37	3.82396
3	14	dTRIM37	2.96329
3	14	dTRIM37	1.56504
3	14	dTRIM37	2.39249
3	14	dTRIM37	5.31559
3	14	dTRIM37	2.2181
3	14	dTRIM37	1.77209
3	14	dTRIM37	1.32892
3	14	dTRIM37	3.17386
3	15	dTRIM37	5.51058
3	15	dTRIM37	3.20182
3	15	dTRIM37	3.81845
3	15	dTRIM37	3.11139
3	15	dTRIM37	0.778454
3	15	dTRIM37	4.13973
3	15	dTRIM37	5.31736
3	15	dTRIM37	7.02116
3	15	dTRIM37	4.08272
3	15	dTRIM37	1.04271
3	15	dTRIM37	0.507347
3	15	dTRIM37	3.1131
3	15	dTRIM37	2.40771
3	15	dTRIM37	0.502129
3	15	dTRIM37	2.9416
3	16	dTRIM37	2.82245
3	16	dTRIM37	14.9457
3	16	dTRIM37	4.11804
3	16	dTRIM37	2.83642
3	16	dTRIM37	2.04591
3	16	dTRIM37	0.0442054
3	16	dTRIM37	1.09348
3	16	dTRIM37	5.64405
3	16	dTRIM37	3.51789
3	17	dTRIM37	1.42103
3	17	dTRIM37	3.6752
3	17	dTRIM37	3.22063
3	17	dTRIM37	5.02072
3	17	dTRIM37	0.52668
3	17	dTRIM37	2.32351
3	17	dTRIM37	2.81518
3	17	dTRIM37	2.53945
3	17	dTRIM37	2.7095
3	17	dTRIM37	2.55531
3	17	dTRIM37	8.44076
3	17	dTRIM37	3.56814
3	17	dTRIM37	1.9603
3	17	dTRIM37	3.22565
3	17	dTRIM37	2.68615
3	18	dTRIM37	2.02168
3	18	dTRIM37	3.73355
3	18	dTRIM37	1.01466
3	18	dTRIM37	5.09757
3	18	dTRIM37	3.58444
3	18	dTRIM37	2.45307
3	18	dTRIM37	4.05972
3	18	dTRIM37	2.59292
3	18	dTRIM37	2.91319
3	18	dTRIM37	7.68132
3	19	dTRIM37	1.85566
3	19	dTRIM37	3.84555
3	19	dTRIM37	1.52696
3	19	dTRIM37	4.86455
3	19	dTRIM37	1.95344
3	19	dTRIM37	0.713893
3	19	dTRIM37	3.40455
3	19	dTRIM37	2.5189
3	19	dTRIM37	0.324041
3	19	dTRIM37	1.70369
3	20	dTRIM37	7.00305
3	20	dTRIM37	2.64266
3	20	dTRIM37	3.89807
3	20	dTRIM37	0.319127
3	20	dTRIM37	2.49244
3	20	dTRIM37	0.90164
3	20	dTRIM37	12.9818
3	20	dTRIM37	4.49302
3	20	dTRIM37	6.39773
3	20	dTRIM37	4.20487
3	20	dTRIM37	2.91667
3	20	dTRIM37	1.23572
3	21	dTRIM37	0.831968
3	21	dTRIM37	5.77139
3	21	dTRIM37	6.16635
3	21	dTRIM37	7.295
3	21	dTRIM37	5.35732
3	21	dTRIM37	5.4257
3	21	dTRIM37	2.00768
3	21	dTRIM37	2.03157
3	21	dTRIM37	3.23165
3	21	dTRIM37	2.9174
3	21	dTRIM37	3.56464
3	21	dTRIM37	2.03558
3	22	dTRIM37	4.50513
3	22	dTRIM37	5.57983
3	22	dTRIM37	3.97697
3	22	dTRIM37	5.87465
3	22	dTRIM37	5.07497
3	22	dTRIM37	7.36822
3	22	dTRIM37	3.26062
3	22	dTRIM37	2.6298
3	22	dTRIM37	2.56776
3	23	dTRIM37	3.29722
3	23	dTRIM37	3.43914
3	23	dTRIM37	0.556344
3	23	dTRIM37	0.369024
3	23	dTRIM37	4.32491
3	23	dTRIM37	3.07939
3	23	dTRIM37	1.73098
3	23	dTRIM37	4.11228
3	23	dTRIM37	2.75711
3	23	dTRIM37	0.274144
3	23	dTRIM37	4.15486
3	23	dTRIM37	2.7469
3	23	dTRIM37	3.42454
3	23	dTRIM37	7.73213
3	23	dTRIM37	0.181979
3	23	dTRIM37	4.30324
3	23	dTRIM37	9.68624
3	24	dTRIM37	4.44469
3	24	dTRIM37	9.90674
3	24	dTRIM37	1.55505
3	24	dTRIM37	6.78984
3	24	dTRIM37	3.2007
3	24	dTRIM37	4.69038
3	24	dTRIM37	2.82867
3	24	dTRIM37	3.31539
3	24	dTRIM37	2.51086
3	24	dTRIM37	4.81155
3	24	dTRIM37	3.56695
3	24	dTRIM37	2.85321
3	25	dTRIM37	0.156161
3	25	dTRIM37	8.69915
3	25	dTRIM37	5.2717
3	25	dTRIM37	3.99954
3	25	dTRIM37	2.83493
3	25	dTRIM37	3.39028
3	25	dTRIM37	2.3912
3	25	dTRIM37	2.84263
3	25	dTRIM37	3.12761
3	25	dTRIM37	2.13764
3	25	dTRIM37	2.15569
3	25	dTRIM37	3.55087
3	25	dTRIM37	1.96239
3	26	dTRIM37	4.50852
3	26	dTRIM37	4.03735
3	26	dTRIM37	4.31037
3	26	dTRIM37	4.35245
3	26	dTRIM37	0.770871
3	26	dTRIM37	2.85098
3	26	dTRIM37	6.58149
3	26	dTRIM37	1.00127
3	26	dTRIM37	0.626642
3	26	dTRIM37	4.32729
3	26	dTRIM37	3.56052
3	27	dTRIM37	8.26101
3	27	dTRIM37	5.34437
3	27	dTRIM37	4.36643
3	27	dTRIM37	2.54061
3	27	dTRIM37	1.89668
3	27	dTRIM37	5.47677
3	27	dTRIM37	4.48042
3	27	dTRIM37	6.81852
3	27	dTRIM37	2.43322
3	27	dTRIM37	0.309316
3	27	dTRIM37	3.38708
3	28	dTRIM37	5.61959
3	28	dTRIM37	4.66975
3	28	dTRIM37	5.22177
3	28	dTRIM37	3.10043
3	28	dTRIM37	6.80058
3	28	dTRIM37	3.61663
3	28	dTRIM37	3.51041
3	28	dTRIM37	3.127
3	28	dTRIM37	12.9097
3	28	dTRIM37	3.65126
3	28	dTRIM37	2.66015
3	28	dTRIM37	2.58375
3	28	dTRIM37	2.18068
3	28	dTRIM37	3.22167
3	29	dTRIM37	6.12607
3	29	dTRIM37	2.83824
3	29	dTRIM37	4.3998
3	29	dTRIM37	3.74307
3	29	dTRIM37	4.18016
3	29	dTRIM37	2.28972
3	29	dTRIM37	4.72212
3	29	dTRIM37	2.2683
3	29	dTRIM37	5.04018
3	29	dTRIM37	3.00247
3	29	dTRIM37	2.27671
3	29	dTRIM37	4.26123
3	29	dTRIM37	2.60105
3	29	dTRIM37	0.348913
3	29	dTRIM37	4.71269
3	29	dTRIM37	8.46842
3	29	dTRIM37	6.06009
3	30	dTRIM37	8.58991
3	30	dTRIM37	1.71534
3	30	dTRIM37	1.45486
3	30	dTRIM37	4.02756
3	30	dTRIM37	1.10622
3	30	dTRIM37	1.69963
3	30	dTRIM37	5.41689
3	30	dTRIM37	6.29787
3	30	dTRIM37	5.08632
3	30	dTRIM37	1.02995
3	30	dTRIM37	2.92314
3	30	dTRIM37	2.94249
3	30	dTRIM37	0.164446
3	30	dTRIM37	3.88051
3	30	dTRIM37	3.22441
3	31	WT	3.95711
3	31	WT	14.4855
3	31	WT	8.03532
3	31	WT	13.7602
3	31	WT	7.2359
3	31	WT	10.7609
3	31	WT	7.06287
3	31	WT	5.50498
3	31	WT	5.41161
3	31	WT	9.03386
3	31	WT	11.6232
3	31	WT	4.56873
3	32	WT	10.1417
3	32	WT	7.38695
3	32	WT	10.4087
3	32	WT	6.89226
3	32	WT	5.74237
3	32	WT	6.90608
3	32	WT	10.8092
3	32	WT	7.49772
3	32	WT	9.34716
3	32	WT	1.3151
3	32	WT	9.1563
3	32	WT	3.63528
3	32	WT	6.50732
3	32	WT	12.926
3	33	WT	4.25332
3	33	WT	1.3779
3	33	WT	6.53535
3	33	WT	5.61456
3	33	WT	13.1123
3	33	WT	6.59213
3	33	WT	13.0069
3	33	WT	8.32715
3	33	WT	12.3902
3	33	WT	20.0792
3	34	WT	12.1588
3	34	WT	9.68899
3	34	WT	16.5459
3	34	WT	10.3875
3	34	WT	12.1642
3	34	WT	8.28675
3	34	WT	4.66986
3	34	WT	9.80366
3	34	WT	10.6632
3	35	WT	2.48681
3	35	WT	10.7693
3	35	WT	3.41202
3	35	WT	6.97221
3	35	WT	8.20304
3	35	WT	16.3774
3	35	WT	6.85356
3	35	WT	12.946
3	35	WT	7.3586
3	36	WT	12.4052
3	36	WT	2.02652
3	36	WT	4.71864
3	36	WT	0.108019
3	36	WT	6.1964
3	36	WT	8.897
3	36	WT	9.85093
3	36	WT	5.50503
3	36	WT	11.9638
3	36	WT	10.9714
3	36	WT	8.76854
3	36	WT	0.500816
3	36	WT	7.02081
3	36	WT	12.8643
3	37	WT	1.97797
3	37	WT	2.22054
3	37	WT	0.0987411
3	37	WT	2.92906
3	37	WT	2.51067
3	37	WT	2.85609
3	37	WT	3.27208
3	37	WT	0.293797
3	37	WT	1.94429
3	37	WT	3.08167
3	37	WT	2.49335
3	37	WT	2.68495
3	37	WT	2.63102
3	37	WT	1.26297
3	38	WT	6.00104
3	38	WT	6.5767
3	38	WT	11.2093
3	38	WT	12.6999
3	38	WT	6.02562
3	38	WT	10.6629
3	38	WT	16.4829
3	38	WT	6.60653
3	38	WT	11.1829
3	38	WT	12.9031
3	38	WT	21.2475
3	39	WT	6.20221
3	39	WT	10.1207
3	39	WT	9.29656
3	39	WT	2.76077
3	39	WT	6.25809
3	39	WT	13.7786
3	39	WT	4.75909
3	39	WT	5.0836
3	39	WT	8.21337
3	39	WT	7.17604
3	39	WT	9.98695
3	39	WT	0.526558
3	40	WT	7.62411
3	40	WT	6.70744
3	40	WT	7.20763
3	40	WT	10.0088
3	40	WT	1.03531
3	40	WT	11.9949
3	40	WT	9.63882
3	40	WT	12.2675
3	40	WT	8.28161
3	40	WT	9.6206
3	40	WT	6.30292
3	40	WT	12.392
3	40	WT	8.9042
3	41	WT	0.751537
3	41	WT	12.3423
3	41	WT	5.67866
3	41	WT	16.2858
3	41	WT	11.7737
3	41	WT	16.0042
3	41	WT	10.1907
3	41	WT	10.8801
3	41	WT	9.15009
3	41	WT	5.80705
3	41	WT	1.57691
3	41	WT	8.31414
3	41	WT	6.28571
3	41	WT	5.13271
3	41	WT	7.38441
3	42	WT	11.0288
3	42	WT	8.58895
3	42	WT	7.28856
3	42	WT	5.49982
3	42	WT	7.77258
3	42	WT	8.01413
3	42	WT	8.51276
3	42	WT	6.38605
3	43	WT	8.65373
3	43	WT	7.55792
3	43	WT	3.98173
3	43	WT	11.4381
3	43	WT	0.0332647
3	43	WT	8.78895
3	43	WT	0.17116
3	43	WT	8.41036
3	43	WT	11.9506
3	43	WT	7.00009
3	43	WT	10.9505
3	43	WT	7.56568
3	44	WT	10.0343
3	44	WT	11.6831
3	44	WT	11.5805
3	44	WT	10.7287
3	44	WT	9.99455
3	44	WT	6.11498
3	44	WT	11.8074
3	44	WT	8.66107
3	44	WT	7.10507
3	44	WT	0.310002
3	45	WT	17.7979
3	45	WT	11.2356
3	45	WT	13.829
3	45	WT	7.67697
3	45	WT	4.74398
3	45	WT	11.2903
3	45	WT	9.5676
3	45	WT	5.99358
3	45	WT	3.66087
3	45	WT	5.08946
3	46	WT	8.7391
3	46	WT	9.55335
3	46	WT	7.8173
3	46	WT	13.7417
3	46	WT	12.2107
3	46	WT	8.91693
3	46	WT	11.9883
3	46	WT	11.822
3	46	WT	0.0476844
3	46	WT	4.95866
3	47	WT	1.67692
3	47	WT	8.51215
3	47	WT	10.2586
3	47	WT	9.56519
3	47	WT	6.79617
3	47	WT	13.6191
3	47	WT	10.1967
3	47	WT	0.237934
3	47	WT	11.6391
3	47	WT	7.98006
3	48	WT	7.54223
3	48	WT	15.2845
3	48	WT	8.52828
3	48	WT	8.82889
3	48	WT	12.275
3	48	WT	10.6194
3	48	WT	7.79619
3	48	WT	4.5942
3	49	WT	7.41231
3	49	WT	8.32239
3	49	WT	10.9081
3	49	WT	10.224
3	49	WT	8.40453
3	49	WT	11.6143
3	49	WT	9.14
3	49	WT	6.44205
3	49	WT	7.64392
3	49	WT	9.97191
3	50	WT	19.0329
3	50	WT	12.882
3	50	WT	7.78535
3	50	WT	7.48057
3	50	WT	15.1287
3	50	WT	6.51441
3	50	WT	10.7193
3	50	WT	9.40562
3	51	WT	12.0881
3	51	WT	13.3078
3	51	WT	0.102037
3	51	WT	2.0495
3	51	WT	9.40963
3	51	WT	7.95149
3	51	WT	7.71757
3	51	WT	4.53515
3	51	WT	11.4555
3	51	WT	7.55654
3	51	WT	4.69993
3	51	WT	12.8175
3	52	WT	11.4129
3	52	WT	13.4577
3	52	WT	9.54151
3	52	WT	10.3567
3	52	WT	13.164
3	52	WT	14.5549
3	52	WT	10.4085
3	52	WT	5.64965
3	52	WT	7.0782
3	52	WT	7.66256
3	52	WT	12.1039
3	52	WT	7.6782
3	52	WT	9.996
3	53	WT	7.7507
3	53	WT	6.25408
3	53	WT	10.7575
3	53	WT	8.07362
3	53	WT	12.7729
3	53	WT	6.24398
3	53	WT	6.76275
3	53	WT	6.1328
3	53	WT	7.9042
3	53	WT	5.17122
3	53	WT	4.61302
3	53	WT	9.05068
3	54	WT	10.2354
3	54	WT	11.6837
3	54	WT	9.36844
3	54	WT	10.517
3	54	WT	10.0858
3	54	WT	6.03632
3	54	WT	6.59918
3	54	WT	6.55109
3	54	WT	4.43638
3	54	WT	6.18065
3	54	WT	6.48922
3	55	WT	8.13198
3	55	WT	18.2226
3	55	WT	11.0654
3	55	WT	12.3189
3	55	WT	6.02347
3	55	WT	9.31638
3	55	WT	9.13809
3	55	WT	8.36173
3	55	WT	9.36706
3	55	WT	7.01585
3	56	WT	11.9306
3	56	WT	5.84482
3	56	WT	5.39461
3	56	WT	11.0695
3	56	WT	8.25321
3	56	WT	4.47645
3	56	WT	0.775296
3	56	WT	9.64302
3	56	WT	10.1441
3	56	WT	7.5593
3	56	WT	4.51547
3	57	WT	5.93805
3	57	WT	3.92193
3	57	WT	10.4452
3	57	WT	3.80336
3	57	WT	4.2719
3	57	WT	3.89519
3	57	WT	1.50773
3	57	WT	7.17974
3	57	WT	4.03528
3	57	WT	2.20566
3	57	WT	5.50161
3	58	WT	16.0511
3	58	WT	9.09371
3	58	WT	11.6013
3	58	WT	7.4109
3	58	WT	12.3473
3	58	WT	7.86403
3	58	WT	9.4056
3	58	WT	8.1955
3	58	WT	4.5864
3	58	WT	4.23709
3	58	WT	6.15315
3	58	WT	8.45892
3	58	WT	8.29453
3	59	WT	26.5457
3	59	WT	5.33881
3	59	WT	7.56733
3	59	WT	1.18466
3	59	WT	13.4686
3	59	WT	11.3259
3	59	WT	7.54218
[truncated: 14 more rows]

## Sheet: SuppFigure3_1G
Interphase						Mitotic
Replicate	Image	Line	siRNA	Total TRIM37 intensity		Replicate	Line	siRNA	Total TRIM37 intensity
1	1	dTRIM37	CON	5.38778		1	dTRIM37	CON	16645.4
1	1	dTRIM37	CON	3.21204		1	dTRIM37	CON	14668.3
1	1	dTRIM37	CON	4.76477		1	dTRIM37	CON	17149.3
1	1	dTRIM37	CON	2.25522		1	dTRIM37	CON	20499.4
1	1	dTRIM37	CON	4.26018		1	dTRIM37	CON	24911.9
1	1	dTRIM37	CON	7.94328		1	dTRIM37	CON	8383.92
1	1	dTRIM37	CON	2.14711		1	dTRIM37	CON	36164.3
1	1	dTRIM37	CON	0.244388		1	dTRIM37	CON	14666.3
1	1	dTRIM37	CON	3.35384		1	dTRIM37	CON	14901
1	1	dTRIM37	CON	3.32021		1	dTRIM37	CON	10396.9
1	1	dTRIM37	CON	1.35019		1	dTRIM37	CON	17989.9
1	1	dTRIM37	CON	2.19251		1	dTRIM37	CON	20292.1
1	1	dTRIM37	CON	3.61392		1	dTRIM37	CON	14247
1	1	dTRIM37	CON	3.0643		1	dTRIM37	CON	29265.9
1	1	dTRIM37	CON	2.12985		1	dTRIM37	CON	19178
1	2	dTRIM37	CON	3.71878		1	dTRIM37	CON	19272.9
1	2	dTRIM37	CON	4.95131		1	dTRIM37	CON	12864.9
1	2	dTRIM37	CON	6.3095		1	dTRIM37	CON	19202.3
1	2	dTRIM37	CON	8.17144		1	dTRIM37	CON	15938.2
1	2	dTRIM37	CON	0.533608		1	dTRIM37	CON	8855.69
1	2	dTRIM37	CON	8.52442		1	dTRIM37	TRIM37	16682.8
1	2	dTRIM37	CON	5.11534		1	dTRIM37	TRIM37	15611.4
1	2	dTRIM37	CON	3.08244		1	dTRIM37	TRIM37	14121.2
1	2	dTRIM37	CON	3.04047		1	dTRIM37	TRIM37	10055.1
1	2	dTRIM37	CON	4.03647		1	dTRIM37	TRIM37	14659.8
1	2	dTRIM37	CON	4.13696		1	dTRIM37	TRIM37	20225.9
1	2	dTRIM37	CON	2.76045		1	dTRIM37	TRIM37	16691.6
1	2	dTRIM37	CON	2.74792		1	dTRIM37	TRIM37	21286.4
1	3	dTRIM37	CON	2.22867		1	dTRIM37	TRIM37	16904.6
1	3	dTRIM37	CON	1.2898		1	dTRIM37	TRIM37	15028.6
1	3	dTRIM37	CON	3.48345		1	dTRIM37	TRIM37	25873.4
1	3	dTRIM37	CON	7.11717		1	dTRIM37	TRIM37	14161.1
1	3	dTRIM37	CON	2.96249		1	dTRIM37	TRIM37	20900.2
1	3	dTRIM37	CON	2.36683		1	dTRIM37	TRIM37	28936.9
1	3	dTRIM37	CON	4.6219		1	dTRIM37	TRIM37	16978.3
1	3	dTRIM37	CON	6.69258		1	dTRIM37	TRIM37	11925.2
1	3	dTRIM37	CON	1.9146		1	dTRIM37	TRIM37	15004.3
1	3	dTRIM37	CON	3.45092		1	dTRIM37	TRIM37	5221.55
1	3	dTRIM37	CON	2.35071		1	dTRIM37	TRIM37	18883.5
1	4	dTRIM37	CON	0.4907		1	dTRIM37	TRIM37	17443.1
1	4	dTRIM37	CON	6.08772		1	WT	CON	33434.2
1	4	dTRIM37	CON	5.79913		1	WT	CON	45961.5
1	4	dTRIM37	CON	1.50163		1	WT	CON	26761
1	4	dTRIM37	CON	4.30527		1	WT	CON	39268.9
1	4	dTRIM37	CON	1.73616		1	WT	CON	42596.1
1	4	dTRIM37	CON	2.4045		1	WT	CON	41669.7
1	4	dTRIM37	CON	2.20005		1	WT	CON	15528.1
1	4	dTRIM37	CON	1.87196		1	WT	CON	31484.4
1	4	dTRIM37	CON	2.46198		1	WT	CON	42115.6
1	4	dTRIM37	CON	2.53349		1	WT	CON	28795.1
1	4	dTRIM37	CON	0.685389		1	WT	CON	33577.5
1	4	dTRIM37	CON	0.721492		1	WT	CON	28991.6
1	4	dTRIM37	CON	0.700771		1	WT	CON	22070.5
1	4	dTRIM37	CON	2.03734		1	WT	CON	31017.6
1	4	dTRIM37	CON	2.21569		1	WT	CON	22278.4
1	4	dTRIM37	CON	0.97052		1	WT	CON	29875.2
1	4	dTRIM37	CON	2.30289		1	WT	CON	28714.3
1	5	dTRIM37	CON	1.87523		1	WT	CON	29749.4
1	5	dTRIM37	CON	6.47269		1	WT	CON	32024.1
1	5	dTRIM37	CON	3.53225		1	WT	CON	28118.5
1	5	dTRIM37	CON	1.89755		1	WT	TRIM37	17012.5
1	5	dTRIM37	CON	3.02713		1	WT	TRIM37	16518
1	5	dTRIM37	CON	3.2977		1	WT	TRIM37	11988.8
1	5	dTRIM37	CON	4.54595		1	WT	TRIM37	23442.4
1	5	dTRIM37	CON	3.37154		1	WT	TRIM37	25544
1	5	dTRIM37	CON	2.63754		1	WT	TRIM37	13949.4
1	5	dTRIM37	CON	5.82785		1	WT	TRIM37	15631
1	5	dTRIM37	CON	3.08988		1	WT	TRIM37	5180.42
1	5	dTRIM37	CON	2.48046		1	WT	TRIM37	14930.2
1	6	dTRIM37	CON	1.51179		1	WT	TRIM37	27676.8
1	6	dTRIM37	CON	6.76828		1	WT	TRIM37	18516.2
1	6	dTRIM37	CON	4.33281		1	WT	TRIM37	29538.1
1	6	dTRIM37	CON	0.560525		1	WT	TRIM37	19686.9
1	6	dTRIM37	CON	2.80801		1	WT	TRIM37	17599.3
1	6	dTRIM37	CON	3.46567		1	WT	TRIM37	22505.5
1	6	dTRIM37	CON	1.29462		1	WT	TRIM37	26863.1
1	6	dTRIM37	CON	3.14229		1	WT	TRIM37	16649.7
1	6	dTRIM37	CON	2.4932		1	WT	TRIM37	11931.3
1	6	dTRIM37	CON	3.11211		1	WT	TRIM37	14724.7
1	6	dTRIM37	CON	1.09837		1	WT	TRIM37	21140.1
1	6	dTRIM37	CON	7.55708		2	dTRIM37	CON	14786.7
1	6	dTRIM37	CON	3.28344		2	dTRIM37	CON	12795
1	6	dTRIM37	CON	1.82539		2	dTRIM37	CON	13388.5
1	6	dTRIM37	CON	2.67684		2	dTRIM37	CON	11580.4
1	7	dTRIM37	CON	5.63586		2	dTRIM37	CON	17211.7
1	7	dTRIM37	CON	3.94073		2	dTRIM37	CON	39587.8
1	7	dTRIM37	CON	1.05032		2	dTRIM37	CON	18794.8
1	7	dTRIM37	CON	6.64134		2	dTRIM37	CON	19231.7
1	7	dTRIM37	CON	1.69068		2	dTRIM37	CON	32379.1
1	7	dTRIM37	CON	2.96939		2	dTRIM37	CON	10663.6
1	7	dTRIM37	CON	7.82242		2	dTRIM37	CON	17768.3
1	7	dTRIM37	CON	1.8248		2	dTRIM37	CON	15014.5
1	7	dTRIM37	CON	2.24414		2	dTRIM37	CON	32843.6
1	7	dTRIM37	CON	3.52392		2	dTRIM37	CON	12508.2
1	7	dTRIM37	CON	1.43922		2	dTRIM37	CON	15482.7
1	8	dTRIM37	CON	3.78444		2	dTRIM37	TRIM37	9629.62
1	8	dTRIM37	CON	1.15721		2	dTRIM37	TRIM37	15718.1
1	8	dTRIM37	CON	0.311025		2	dTRIM37	TRIM37	18831.9
1	8	dTRIM37	CON	1.22597		2	dTRIM37	TRIM37	23513.2
1	8	dTRIM37	CON	0.374075		2	dTRIM37	TRIM37	20618.2
1	8	dTRIM37	CON	1.0716		2	dTRIM37	TRIM37	13138.3
1	8	dTRIM37	CON	1.10965		2	dTRIM37	TRIM37	13871.2
1	8	dTRIM37	CON	0.63003		2	dTRIM37	TRIM37	23145.7
1	8	dTRIM37	CON	1.67727		2	dTRIM37	TRIM37	22736.1
1	8	dTRIM37	CON	1.1912		2	dTRIM37	TRIM37	24171.4
1	8	dTRIM37	CON	1.49937		2	dTRIM37	TRIM37	15994.3
1	8	dTRIM37	CON	0.860883		2	dTRIM37	TRIM37	17261.2
1	8	dTRIM37	CON	2.86514		2	dTRIM37	TRIM37	7071.55
1	8	dTRIM37	CON	0.472572		2	dTRIM37	TRIM37	10198
1	8	dTRIM37	CON	2.05206		2	dTRIM37	TRIM37	20997.9
1	9	dTRIM37	CON	1.72622		2	WT	CON	19239.1
1	9	dTRIM37	CON	3.31183		2	WT	CON	44039.6
1	9	dTRIM37	CON	2.02194		2	WT	CON	16798.7
1	9	dTRIM37	CON	3.48017		2	WT	CON	40375.9
1	9	dTRIM37	CON	3.08051		2	WT	CON	19128.2
1	9	dTRIM37	CON	0.967208		2	WT	CON	23364.7
1	9	dTRIM37	CON	4.75419		2	WT	CON	25116.4
1	9	dTRIM37	CON	2.88937		2	WT	CON	23057.3
1	9	dTRIM37	CON	2.67893		2	WT	CON	22966.4
1	9	dTRIM37	CON	2.90741		2	WT	CON	19126.8
1	9	dTRIM37	CON	1.48368		2	WT	CON	29522.8
1	9	dTRIM37	CON	2.37452		2	WT	CON	30429.9
1	9	dTRIM37	CON	1.02274		2	WT	CON	23081.4
1	10	dTRIM37	CON	3.39617		2	WT	CON	15147.9
1	10	dTRIM37	CON	4.09374		2	WT	CON	25876.8
1	10	dTRIM37	CON	7.15163		2	WT	TRIM37	11374.2
1	10	dTRIM37	CON	6.41541		2	WT	TRIM37	17937.5
1	10	dTRIM37	CON	2.55586		2	WT	TRIM37	25110.2
1	10	dTRIM37	CON	1.88904		2	WT	TRIM37	17208.8
1	10	dTRIM37	CON	3.97862		2	WT	TRIM37	16715.4
1	10	dTRIM37	CON	1.90414		2	WT	TRIM37	21242.9
1	10	dTRIM37	CON	1.5366		2	WT	TRIM37	23022.7
1	10	dTRIM37	CON	2.02803		2	WT	TRIM37	25430.5
1	10	dTRIM37	CON	2.9035		2	WT	TRIM37	17703.8
1	10	dTRIM37	CON	0.547921		2	WT	TRIM37	9807.34
1	10	dTRIM37	CON	2.58582		2	WT	TRIM37	10589.2
1	10	dTRIM37	CON	1.76524		2	WT	TRIM37	14885.8
1	10	dTRIM37	CON	5.88275		2	WT	TRIM37	25959.5
1	10	dTRIM37	CON	2.30697		2	WT	TRIM37	31670.1
1	10	dTRIM37	CON	1.64131		2	WT	TRIM37	12203.3
1	10	dTRIM37	CON	0.938582		3	dTRIM37	CON	18678.4
1	10	dTRIM37	CON	2.2074		3	dTRIM37	CON	23193.5
1	11	dTRIM37	CON	1.86767		3	dTRIM37	CON	15035.6
1	11	dTRIM37	CON	2.21976		3	dTRIM37	CON	14771.2
1	11	dTRIM37	CON	1.82872		3	dTRIM37	CON	24726.3
1	11	dTRIM37	CON	3.4703		3	dTRIM37	CON	17985.8
1	11	dTRIM37	CON	4.47105		3	dTRIM37	CON	25377.7
1	11	dTRIM37	CON	3.0533		3	dTRIM37	CON	28146.3
1	11	dTRIM37	CON	4.00009		3	dTRIM37	CON	33651.9
1	11	dTRIM37	CON	2.9415		3	dTRIM37	CON	14080.4
1	11	dTRIM37	CON	4.70532		3	dTRIM37	CON	11987.2
1	11	dTRIM37	CON	8.10893		3	dTRIM37	CON	34583.1
1	11	dTRIM37	CON	3.93236		3	dTRIM37	CON	12692.1
1	11	dTRIM37	CON	1.68217		3	dTRIM37	CON	33452.9
1	11	dTRIM37	CON	2.70481		3	dTRIM37	CON	15898.9
1	11	dTRIM37	CON	2.98033		3	dTRIM37	TRIM37	9960.73
1	11	dTRIM37	CON	1.56075		3	dTRIM37	TRIM37	22437.5
1	12	dTRIM37	CON	1.4695		3	dTRIM37	TRIM37	14682.5
1	12	dTRIM37	CON	2.20305		3	dTRIM37	TRIM37	20872.7
1	12	dTRIM37	CON	8.18668		3	dTRIM37	TRIM37	25828.6
1	12	dTRIM37	CON	7.44585		3	dTRIM37	TRIM37	19744.9
1	12	dTRIM37	CON	2.71661		3	dTRIM37	TRIM37	18352.8
1	12	dTRIM37	CON	3.10799		3	dTRIM37	TRIM37	9875.85
1	12	dTRIM37	CON	3.27842		3	dTRIM37	TRIM37	20747.8
1	12	dTRIM37	CON	1.36806		3	dTRIM37	TRIM37	16523.8
1	12	dTRIM37	CON	2.16866		3	dTRIM37	TRIM37	28485
1	12	dTRIM37	CON	2.54565		3	dTRIM37	TRIM37	16782.8
1	12	dTRIM37	CON	3.52879		3	dTRIM37	TRIM37	17689.3
1	12	dTRIM37	CON	1.07547		3	dTRIM37	TRIM37	26766.9
1	12	dTRIM37	CON	2.94321		3	dTRIM37	TRIM37	18128.5
1	12	dTRIM37	CON	1.14879		3	WT	CON	21137.5
1	13	dTRIM37	CON	2.18231		3	WT	CON	16737.1
1	13	dTRIM37	CON	4.43264		3	WT	CON	19560.9
1	13	dTRIM37	CON	2.66715		3	WT	CON	30995.6
1	13	dTRIM37	CON	2.57357		3	WT	CON	20169.5
1	13	dTRIM37	CON	3.16664		3	WT	CON	20450.6
1	13	dTRIM37	CON	2.60053		3	WT	CON	21535.2
1	13	dTRIM37	CON	2.68472		3	WT	CON	31816.5
1	14	dTRIM37	CON	8.09607		3	WT	CON	20017.9
1	14	dTRIM37	CON	6.23426		3	WT	CON	39918.2
1	14	dTRIM37	CON	3.22969		3	WT	CON	17055.8
1	14	dTRIM37	CON	4.13155		3	WT	CON	27109.5
1	14	dTRIM37	CON	2.97098		3	WT	CON	34907.9
1	14	dTRIM37	CON	2.91905		3	WT	CON	31746.1
1	14	dTRIM37	CON	3.02144		3	WT	CON	24839.3
1	14	dTRIM37	CON	3.17401		3	WT	TRIM37	15963.3
1	14	dTRIM37	CON	2.96527		3	WT	TRIM37	8797.52
1	14	dTRIM37	CON	2.89706		3	WT	TRIM37	18129.7
1	14	dTRIM37	CON	3.26261		3	WT	TRIM37	24734.7
1	14	dTRIM37	CON	6.71701		3	WT	TRIM37	18369.7
1	14	dTRIM37	CON	1.5044		3	WT	TRIM37	11350.1
1	14	dTRIM37	CON	0.76524		3	WT	TRIM37	12452
1	14	dTRIM37	CON	1.22014		3	WT	TRIM37	25799.8
1	15	dTRIM37	CON	1.10881		3	WT	TRIM37	21658.2
1	15	dTRIM37	CON	1.29754		3	WT	TRIM37	9937.87
1	15	dTRIM37	CON	0.0727855		3	WT	TRIM37	22245.6
1	15	dTRIM37	CON	1.26723		3	WT	TRIM37	11950.9
1	15	dTRIM37	CON	1.58047		3	WT	TRIM37	24290.1
1	15	dTRIM37	CON	1.87372		3	WT	TRIM37	12094.2
1	15	dTRIM37	CON	1.87317		3	WT	TRIM37	6042.88
1	15	dTRIM37	CON	1.25246
1	15	dTRIM37	CON	1.37226
1	15	dTRIM37	CON	0.953536
1	15	dTRIM37	CON	0.255619
1	15	dTRIM37	CON	0.492378
1	15	dTRIM37	CON	2.08902
1	16	dTRIM37	CON	1.84202
1	16	dTRIM37	CON	3.33356
1	16	dTRIM37	CON	7.11362
1	16	dTRIM37	CON	3.19448
1	16	dTRIM37	CON	2.01692
1	16	dTRIM37	CON	4.22707
1	16	dTRIM37	CON	3.65425
1	16	dTRIM37	CON	1.77214
1	16	dTRIM37	CON	1.17484
1	16	dTRIM37	CON	1.56246
1	16	dTRIM37	CON	0.758022
1	16	dTRIM37	CON	1.90016
1	16	dTRIM37	CON	2.55061
1	16	dTRIM37	CON	5.34009
1	16	dTRIM37	CON	1.95589
1	16	dTRIM37	CON	1.15879
1	16	dTRIM37	CON	0.985046
1	17	dTRIM37	CON	1.21051
1	17	dTRIM37	CON	1.42977
1	17	dTRIM37	CON	1.52224
1	17	dTRIM37	CON	1.33765
1	17	dTRIM37	CON	1.97827
1	17	dTRIM37	CON	2.49656
1	17	dTRIM37	CON	2.26046
1	17	dTRIM37	CON	2.78694
1	17	dTRIM37	CON	2.91846
1	17	dTRIM37	CON	4.70758
1	17	dTRIM37	CON	0.209339
1	17	dTRIM37	CON	0.986053
1	17	dTRIM37	CON	1.85536
1	17	dTRIM37	CON	1.4553
1	18	dTRIM37	CON	6.20198
1	18	dTRIM37	CON	2.07843
1	18	dTRIM37	CON	3.14147
1	18	dTRIM37	CON	2.96773
1	18	dTRIM37	CON	3.84445
1	18	dTRIM37	CON	2.44677
1	18	dTRIM37	CON	1.86766
1	18	dTRIM37	CON	2.75549
1	18	dTRIM37	CON	1.89805
1	18	dTRIM37	CON	1.2444
1	18	dTRIM37	CON	0.785641
1	18	dTRIM37	CON	1.27228
1	19	dTRIM37	CON	0.901305
1	19	dTRIM37	CON	1.89058
1	19	dTRIM37	CON	1.18201
1	19	dTRIM37	CON	1.79194
1	19	dTRIM37	CON	2.36852
1	19	dTRIM37	CON	2.29384
1	19	dTRIM37	CON	1.56046
1	19	dTRIM37	CON	2.32111
1	19	dTRIM37	CON	3.70196
1	20	dTRIM37	CON	1.4723
1	20	dTRIM37	CON	3.6323
1	20	dTRIM37	CON	3.07088
1	20	dTRIM37	CON	1.1772
1	20	dTRIM37	CON	1.29233
1	20	dTRIM37	CON	1.55251
1	20	dTRIM37	CON	2.90945
1	20	dTRIM37	CON	2.53129
1	20	dTRIM37	CON	1.47965
1	20	dTRIM37	CON	1.29409
1	20	dTRIM37	CON	3.27961
1	21	dTRIM37	CON	3.69157
1	21	dTRIM37	CON	1.51125
1	21	dTRIM37	CON	3.45263
1	21	dTRIM37	CON	1.65985
1	21	dTRIM37	CON	2.71398
1	21	dTRIM37	CON	0.730205
1	21	dTRIM37	CON	1.24453
1	21	dTRIM37	CON	2.19409
1	21	dTRIM37	CON	1.97653
1	21	dTRIM37	CON	4.21096
1	22	dTRIM37	CON	2.78668
1	22	dTRIM37	CON	1.15698
1	22	dTRIM37	CON	0.656001
1	22	dTRIM37	CON	3.52996
1	22	dTRIM37	CON	3.39007
1	22	dTRIM37	CON	2.11733
1	22	dTRIM37	CON	1.98125
1	22	dTRIM37	CON	4.89813
1	22	dTRIM37	CON	1.58914
1	22	dTRIM37	CON	1.41755
1	22	dTRIM37	CON	3.65533
1	22	dTRIM37	CON	0.293996
1	23	dTRIM37	CON	2.91962
1	23	dTRIM37	CON	2.64872
1	23	dTRIM37	CON	2.32963
1	23	dTRIM37	CON	3.45724
1	23	dTRIM37	CON	3.6506
1	23	dTRIM37	CON	1.84329
1	23	dTRIM37	CON	1.5602
1	23	dTRIM37	CON	3.42071
1	23	dTRIM37	CON	1.68904
1	23	dTRIM37	CON	1.41363
1	23	dTRIM37	CON	3.68762
1	23	dTRIM37	CON	3.19374
1	23	dTRIM37	CON	3.6676
1	23	dTRIM37	CON	5.1219
1	24	dTRIM37	CON	7.70906
1	24	dTRIM37	CON	1.06354
1	24	dTRIM37	CON	0.373663
1	24	dTRIM37	CON	2.84144
1	24	dTRIM37	CON	4.59481
1	24	dTRIM37	CON	2.61102
1	24	dTRIM37	CON	1.04085
1	24	dTRIM37	CON	2.23668
1	24	dTRIM37	CON	3.4768
1	24	dTRIM37	CON	1.63709
1	24	dTRIM37	CON	1.37185
1	25	dTRIM37	CON	4.91107
1	25	dTRIM37	CON	1.01918
1	25	dTRIM37	CON	1.30901
1	25	dTRIM37	CON	2.63587
1	25	dTRIM37	CON	1.54012
1	25	dTRIM37	CON	3.44016
1	25	dTRIM37	CON	2.71447
1	25	dTRIM37	CON	2.08597
1	25	dTRIM37	CON	1.123
1	25	dTRIM37	CON	2.31698
1	25	dTRIM37	CON	3.20012
1	25	dTRIM37	CON	5.26874
1	25	dTRIM37	CON	0.572793
1	25	dTRIM37	CON	0.447013
1	25	dTRIM37	CON	1.58032
1	25	dTRIM37	CON	1.01788
1	25	dTRIM37	CON	0.46833
1	26	dTRIM37	CON	1.88098
1	26	dTRIM37	CON	1.69934
1	26	dTRIM37	CON	1.17095
1	26	dTRIM37	CON	2.84442
1	26	dTRIM37	CON	8.49749
1	26	dTRIM37	CON	2.63026
1	26	dTRIM37	CON	4.65869
1	26	dTRIM37	CON	2.01875
1	26	dTRIM37	CON	3.48139
1	27	dTRIM37	CON	1.73585
1	27	dTRIM37	CON	4.43058
1	27	dTRIM37	CON	4.07211
1	27	dTRIM37	CON	1.46601
1	27	dTRIM37	CON	2.97192
1	27	dTRIM37	CON	1.06966
1	27	dTRIM37	CON	2.32549
1	27	dTRIM37	CON	0.46067
1	27	dTRIM37	CON	3.55854
1	27	dTRIM37	CON	3.07561
1	27	dTRIM37	CON	1.4434
1	27	dTRIM37	CON	2.17809
1	28	dTRIM37	CON	1.19323
1	28	dTRIM37	CON	2.78338
1	28	dTRIM37	CON	3.99762
1	28	dTRIM37	CON	2.76127
1	28	dTRIM37	CON	5.95799
1	28	dTRIM37	CON	3.09404
1	28	dTRIM37	CON	2.53362
1	28	dTRIM37	CON	5.6793
1	28	dTRIM37	CON	1.46954
1	28	dTRIM37	CON	3.93938
1	28	dTRIM37	CON	2.69696
1	28	dTRIM37	CON	6.74653
1	28	dTRIM37	CON	0.356161
1	28	dTRIM37	CON	1.81897
1	28	dTRIM37	CON	0.9411
1	28	dTRIM37	CON	3.06497
1	28	dTRIM37	CON	1.2853
1	28	dTRIM37	CON	2.28554
1	28	dTRIM37	CON	3.06207
1	28	dTRIM37	CON	1.1088
1	28	dTRIM37	CON	3.7043
1	28	dTRIM37	CON	1.67056
1	29	dTRIM37	CON	4.63548
1	29	dTRIM37	CON	2.83804
1	29	dTRIM37	CON	3.07562
1	29	dTRIM37	CON	0.718807
1	29	dTRIM37	CON	6.74379
1	29	dTRIM37	CON	7.5113
1	29	dTRIM37	CON	6.3472
1	29	dTRIM37	CON	2.1042
1	29	dTRIM37	CON	3.91876
1	29	dTRIM37	CON	3.93117
1	29	dTRIM37	CON	3.0256
1	30	dTRIM37	CON	6.87587
1	30	dTRIM37	CON	4.11875
1	30	dTRIM37	CON	4.47071
1	30	dTRIM37	CON	6.55962
1	30	dTRIM37	CON	0.350088
1	30	dTRIM37	CON	3.17432
1	30	dTRIM37	CON	3.95998
1	30	dTRIM37	CON	2.85653
1	30	dTRIM37	CON	1.99301
1	30	dTRIM37	CON	7.61109
1	30	dTRIM37	CON	1.45336
1	31	dTRIM37	TRIM37	3.05042
1	31	dTRIM37	TRIM37	0.842695
1	31	dTRIM37	TRIM37	1.04131
1	31	dTRIM37	TRIM37	0.986511
1	31	dTRIM37	TRIM37	1.16179
1	31	dTRIM37	TRIM37	2.98297
1	31	dTRIM37	TRIM37	13.5799
1	31	dTRIM37	TRIM37	5.31276
1	31	dTRIM37	TRIM37	1.29361
1	31	dTRIM37	TRIM37	1.95218
1	31	dTRIM37	TRIM37	1.8537
1	31	dTRIM37	TRIM37	3.76989
1	31	dTRIM37	TRIM37	8.70929
1	31	dTRIM37	TRIM37	3.05249
1	31	dTRIM37	TRIM37	1.00259
1	32	dTRIM37	TRIM37	2.97465
1	32	dTRIM37	TRIM37	2.20737
1	32	dTRIM37	TRIM37	0.0603037
1	32	dTRIM37	TRIM37	3.06665
1	32	dTRIM37	TRIM37	3.04396
1	32	dTRIM37	TRIM37	1.65943
1	32	dTRIM37	TRIM37	3.09471
1	32	dTRIM37	TRIM37	2.85008
1	32	dTRIM37	TRIM37	1.38015
1	32	dTRIM37	TRIM37	3.18303
1	32	dTRIM37	TRIM37	1.25515
1	32	dTRIM37	TRIM37	4.31069
1	32	dTRIM37	TRIM37	2.92847
1	32	dTRIM37	TRIM37	1.58145
1	33	dTRIM37	TRIM37	1.56161
1	33	dTRIM37	TRIM37	5.52609
1	33	dTRIM37	TRIM37	3.91955
1	33	dTRIM37	TRIM37	4.92137
1	33	dTRIM37	TRIM37	0.925139
1	33	dTRIM37	TRIM37	3.42153
1	33	dTRIM37	TRIM37	1.17873
1	33	dTRIM37	TRIM37	1.91969
1	33	dTRIM37	TRIM37	2.39936
1	33	dTRIM37	TRIM37	0.733852
1	33	dTRIM37	TRIM37	0.557366
1	33	dTRIM37	TRIM37	1.51821
1	33	dTRIM37	TRIM37	1.66932
1	33	dTRIM37	TRIM37	2.07424
1	34	dTRIM37	TRIM37	1.90752
1	34	dTRIM37	TRIM37	4.89395
1	34	dTRIM37	TRIM37	1.15436
1	34	dTRIM37	TRIM37	1.73347
1	34	dTRIM37	TRIM37	0.314748
1	34	dTRIM37	TRIM37	2.95851
1	34	dTRIM37	TRIM37	0.226993
1	34	dTRIM37	TRIM37	2.52625
1	34	dTRIM37	TRIM37	3.48803
1	34	dTRIM37	TRIM37	5.13855
1	34	dTRIM37	TRIM37	6.30954
1	35	dTRIM37	TRIM37	5.39524
1	35	dTRIM37	TRIM37	3.95761
1	35	dTRIM37	TRIM37	2.02278
1	35	dTRIM37	TRIM37	3.90968
1	35	dTRIM37	TRIM37	5.63732
1	35	dTRIM37	TRIM37	2.2264
1	35	dTRIM37	TRIM37	1.54353
1	35	dTRIM37	TRIM37	1.37613
1	35	dTRIM37	TRIM37	2.39821
1	35	dTRIM37	TRIM37	2.20623
1	35	dTRIM37	TRIM37	3.31348
1	35	dTRIM37	TRIM37	2.50036
1	35	dTRIM37	TRIM37	2.45365
1	35	dTRIM37	TRIM37	1.78543
1	36	dTRIM37	TRIM37	5.16089
1	36	dTRIM37	TRIM37	0.245884
1	36	dTRIM37	TRIM37	1.13167
1	36	dTRIM37	TRIM37	5.50024
1	36	dTRIM37	TRIM37	7.8121
1	36	dTRIM37	TRIM37	2.2931
1	36	dTRIM37	TRIM37	4.72169
1	36	dTRIM37	TRIM37	4.32242
1	36	dTRIM37	TRIM37	6.22924
1	36	dTRIM37	TRIM37	2.27842
1	36	dTRIM37	TRIM37	2.37746
1	36	dTRIM37	TRIM37	4.38358
1	36	dTRIM37	TRIM37	2.838
1	36	dTRIM37	TRIM37	3.37269
1	36	dTRIM37	TRIM37	2.5057
1	37	dTRIM37	TRIM37	3.37075
1	37	dTRIM37	TRIM37	2.49578
1	37	dTRIM37	TRIM37	2.80125
1	37	dTRIM37	TRIM37	3.31666
1	37	dTRIM37	TRIM37	1.62809
1	37	dTRIM37	TRIM37	4.84445
1	37	dTRIM37	TRIM37	3.08908
1	37	dTRIM37	TRIM37	3.63012
1	37	dTRIM37	TRIM37	2.19068
1	37	dTRIM37	TRIM37	4.81817
1	37	dTRIM37	TRIM37	0.370932
1	37	dTRIM37	TRIM37	3.38705
1	37	dTRIM37	TRIM37	5.68687
1	37	dTRIM37	TRIM37	8.00336
1	37	dTRIM37	TRIM37	3.10782
1	38	dTRIM37	TRIM37	2.34893
1	38	dTRIM37	TRIM37	4.21859
1	38	dTRIM37	TRIM37	3.11107
1	38	dTRIM37	TRIM37	2.26493
1	38	dTRIM37	TRIM37	1.40034
1	38	dTRIM37	TRIM37	5.07485
1	38	dTRIM37	TRIM37	2.82362
1	38	dTRIM37	TRIM37	2.55019
1	38	dTRIM37	TRIM37	2.30152
1	38	dTRIM37	TRIM37	1.68392
1	38	dTRIM37	TRIM37	3.2372
1	38	dTRIM37	TRIM37	2.42211
1	38	dTRIM37	TRIM37	1.96251
1	39	dTRIM37	TRIM37	3.82849
1	39	dTRIM37	TRIM37	3.11711
1	39	dTRIM37	TRIM37	1.77983
1	39	dTRIM37	TRIM37	3.23153
1	39	dTRIM37	TRIM37	3.13954
1	39	dTRIM37	TRIM37	1.49287
1	39	dTRIM37	TRIM37	5.06059
1	39	dTRIM37	TRIM37	5.69461
1	39	dTRIM37	TRIM37	2.73986
1	39	dTRIM37	TRIM37	2.48743
1	39	dTRIM37	TRIM37	2.40069
1	39	dTRIM37	TRIM37	2.86238
1	39	dTRIM37	TRIM37	3.31478
1	40	dTRIM37	TRIM37	2.19193
1	40	dTRIM37	TRIM37	1.63178
1	40	dTRIM37	TRIM37	3.86314
1	40	dTRIM37	TRIM37	6.6013
1	40	dTRIM37	TRIM37	0.468376
1	40	dTRIM37	TRIM37	0.723064
1	40	dTRIM37	TRIM37	2.93039
1	40	dTRIM37	TRIM37	3.56117
1	40	dTRIM37	TRIM37	3.11604
1	40	dTRIM37	TRIM37	2.58112
1	40	dTRIM37	TRIM37	0.533501
1	40	dTRIM37	TRIM37	2.32967
1	41	dTRIM37	TRIM37	1.42242
1	41	dTRIM37	TRIM37	1.52232
1	41	dTRIM37	TRIM37	1.523
1	41	dTRIM37	TRIM37	2.65687
1	41	dTRIM37	TRIM37	1.7238
1	41	dTRIM37	TRIM37	2.31336
1	41	dTRIM37	TRIM37	1.69834
1	41	dTRIM37	TRIM37	4.19626
1	42	dTRIM37	TRIM37	2.89346
1	42	dTRIM37	TRIM37	1.79336
1	42	dTRIM37	TRIM37	1.9275
1	42	dTRIM37	TRIM37	0.711025
1	42	dTRIM37	TRIM37	2.41895
1	42	dTRIM37	TRIM37	2.47468
1	42	dTRIM37	TRIM37	3.366
1	42	dTRIM37	TRIM37	1.73577
1	42	dTRIM37	TRIM37	0.361547
1	42	dTRIM37	TRIM37	12.8825
1	42	dTRIM37	TRIM37	2.78331
1	43	dTRIM37	TRIM37	3.85284
1	43	dTRIM37	TRIM37	1.9438
1	43	dTRIM37	TRIM37	1.02316
1	43	dTRIM37	TRIM37	2.34307
1	43	dTRIM37	TRIM37	3.6215
1	43	dTRIM37	TRIM37	4.4352
1	43	dTRIM37	TRIM37	3.45312
1	43	dTRIM37	TRIM37	7.42342
1	43	dTRIM37	TRIM37	0.405814
1	43	dTRIM37	TRIM37	1.53849
1	43	dTRIM37	TRIM37	1.60645
1	43	dTRIM37	TRIM37	1.83948
1	43	dTRIM37	TRIM37	3.51862
1	43	dTRIM37	TRIM37	4.54043
1	43	dTRIM37	TRIM37	1.80124
1	43	dTRIM37	TRIM37	0.617517
1	43	dTRIM37	TRIM37	1.19446
1	43	dTRIM37	TRIM37	3.49323
1	43	dTRIM37	TRIM37	4.23975
1	44	dTRIM37	TRIM37	0.563531
1	44	dTRIM37	TRIM37	1.56905
1	44	dTRIM37	TRIM37	1.92842
1	44	dTRIM37	TRIM37	0.853346
1	44	dTRIM37	TRIM37	0.953597
1	44	dTRIM37	TRIM37	1.13194
1	44	dTRIM37	TRIM37	0.535866
1	44	dTRIM37	TRIM37	1.56922
1	44	dTRIM37	TRIM37	0.625513
1	44	dTRIM37	TRIM37	0.364202
1	44	dTRIM37	TRIM37	0.738216
1	45	dTRIM37	TRIM37	2.16997
1	45	dTRIM37	TRIM37	3.67665
1	45	dTRIM37	TRIM37	6.97957
1	45	dTRIM37	TRIM37	2.26099
1	45	dTRIM37	TRIM37	3.04967
1	45	dTRIM37	TRIM37	2.74662
1	45	dTRIM37	TRIM37	2.21126
1	45	dTRIM37	TRIM37	1.16407
1	45	dTRIM37	TRIM37	3.70256
1	45	dTRIM37	TRIM37	2.2855
1	46	dTRIM37	TRIM37	3.0679
1	46	dTRIM37	TRIM37	6.23682
1	46	dTRIM37	TRIM37	3.24154
1	46	dTRIM37	TRIM37	2.83673
1	46	dTRIM37	TRIM37	3.75953
1	46	dTRIM37	TRIM37	5.31763
1	46	dTRIM37	TRIM37	1.26703
1	46	dTRIM37	TRIM37	2.5658
1	46	dTRIM37	TRIM37	2.57482
1	46	dTRIM37	TRIM37	8.26911
1	46	dTRIM37	TRIM37	2.26804
1	46	dTRIM37	TRIM37	2.18082
1	46	dTRIM37	TRIM37	2.13175
1	46	dTRIM37	TRIM37	2.14324
1	46	dTRIM37	TRIM37	1.39222
1	46	dTRIM37	TRIM37	3.13375
1	46	dTRIM37	TRIM37	0.677424
1	46	dTRIM37	TRIM37	2.26607
1	47	dTRIM37	TRIM37	3.25589
1	47	dTRIM37	TRIM37	1.61613
1	47	dTRIM37	TRIM37	3.16727
1	47	dTRIM37	TRIM37	2.01091
1	47	dTRIM37	TRIM37	0.908705
1	47	dTRIM37	TRIM37	2.02776
1	47	dTRIM37	TRIM37	1.96379
1	47	dTRIM37	TRIM37	0.29897
1	47	dTRIM37	TRIM37	0.31133
1	47	dTRIM37	TRIM37	1.24852
1	47	dTRIM37	TRIM37	2.78668
1	47	dTRIM37	TRIM37	1.13661
1	47	dTRIM37	TRIM37	1.03662
1	47	dTRIM37	TRIM37	1.44463
1	47	dTRIM37	TRIM37	1.80781
1	48	dTRIM37	TRIM37	3.54632
1	48	dTRIM37	TRIM37	4.95645
1	48	dTRIM37	TRIM37	2.1077
1	48	dTRIM37	TRIM37	2.20008
1	48	dTRIM37	TRIM37	5.43821
1	48	dTRIM37	TRIM37	6.89654
1	48	dTRIM37	TRIM37	2.79109
1	48	dTRIM37	TRIM37	3.81421
1	48	dTRIM37	TRIM37	2.32764
1	48	dTRIM37	TRIM37	3.59825
1	48	dTRIM37	TRIM37	1.81816
1	48	dTRIM37	TRIM37	2.72522
1	48	dTRIM37	TRIM37	3.78752
1	49	dTRIM37	TRIM37	5.64463
1	49	dTRIM37	TRIM37	1.69364
1	49	dTRIM37	TRIM37	3.56233
1	49	dTRIM37	TRIM37	2.47639
1	49	dTRIM37	TRIM37	2.43432
1	49	dTRIM37	TRIM37	2.98819
1	49	dTRIM37	TRIM37	0.106447
1	49	dTRIM37	TRIM37	3.52924
1	49	dTRIM37	TRIM37	0.711635
1	50	dTRIM37	TRIM37	1.94234
1	50	dTRIM37	TRIM37	2.52461
1	50	dTRIM37	TRIM37	2.92596
1	50	dTRIM37	TRIM37	1.12744
1	50	dTRIM37	TRIM37	0.844282
1	50	dTRIM37	TRIM37	2.28228
1	50	dTRIM37	TRIM37	3.94684
1	50	dTRIM37	TRIM37	3.18526
1	50	dTRIM37	TRIM37	3.97472
1	50	dTRIM37	TRIM37	3.57786
1	50	dTRIM37	TRIM37	1.93436
1	50	dTRIM37	TRIM37	4.7839
1	50	dTRIM37	TRIM37	1.54818
1	50	dTRIM37	TRIM37	1.42744
1	50	dTRIM37	TRIM37	1.8844
1	51	dTRIM37	TRIM37	1.96165
1	51	dTRIM37	TRIM37	2.85362
1	51	dTRIM37	TRIM37	2.51366
1	51	dTRIM37	TRIM37	2.58972
1	51	dTRIM37	TRIM37	3.04616
1	51	dTRIM37	TRIM37	2.94664
1	51	dTRIM37	TRIM37	2.53637
1	51	dTRIM37	TRIM37	2.61761
1	51	dTRIM37	TRIM37	3.96216
1	51	dTRIM37	TRIM37	2.54228
1	51	dTRIM37	TRIM37	3.69303
1	51	dTRIM37	TRIM37	2.08763
1	52	dTRIM37	TRIM37	5.23368
1	52	dTRIM37	TRIM37	1.38636
1	52	dTRIM37	TRIM37	3.4242
1	52	dTRIM37	TRIM37	2.93695
1	52	dTRIM37	TRIM37	2.8069
1	52	dTRIM37	TRIM37	3.90105
1	52	dTRIM37	TRIM37	3.25039
1	52	dTRIM37	TRIM37	2.84607
1	52	dTRIM37	TRIM37	0.823148
1	52	dTRIM37	TRIM37	5.62283
1	52	dTRIM37	TRIM37	0.559258
1	52	dTRIM37	TRIM37	0.720882
1	52	dTRIM37	TRIM37	0.450385
1	52	dTRIM37	TRIM37	1.19554
1	52	dTRIM37	TRIM37	3.07097
1	52	dTRIM37	TRIM37	1.68437
1	52	dTRIM37	TRIM37	1.54324
1	53	dTRIM37	TRIM37	3.22254
1	53	dTRIM37	TRIM37	2.17462
1	53	dTRIM37	TRIM37	1.02548
1	53	dTRIM37	TRIM37	1.70965
1	53	dTRIM37	TRIM37	3.28473
1	53	dTRIM37	TRIM37	2.8399
1	53	dTRIM37	TRIM37	8.26355
1	53	dTRIM37	TRIM37	2.19535
1	53	dTRIM37	TRIM37	1.92885
1	53	dTRIM37	TRIM37	4.1267
1	53	dTRIM37	TRIM37	2.66552
1	53	dTRIM37	TRIM37	1.57458
1	53	dTRIM37	TRIM37	1.95018
1	53	dTRIM37	TRIM37	1.78679
1	53	dTRIM37	TRIM37	0.958892
1	53	dTRIM37	TRIM37	3.84016
1	53	dTRIM37	TRIM37	1.74867
1	53	dTRIM37	TRIM37	1.54806
1	53	dTRIM37	TRIM37	2.74948
1	54	dTRIM37	TRIM37	4.06906
1	54	dTRIM37	TRIM37	3.94615
1	54	dTRIM37	TRIM37	2.3378
1	54	dTRIM37	TRIM37	3.00041
1	54	dTRIM37	TRIM37	3.14
1	54	dTRIM37	TRIM37	3.96678
1	54	dTRIM37	TRIM37	1.66722
1	54	dTRIM37	TRIM37	5.38169
1	54	dTRIM37	TRIM37	4.60998
1	54	dTRIM37	TRIM37	7.26117
1	54	dTRIM37	TRIM37	1.38682
1	54	dTRIM37	TRIM37	2.1879
1	54	dTRIM37	TRIM37	3.93654
1	54	dTRIM37	TRIM37	2.80439
1	54	dTRIM37	TRIM37	3.74874
1	54	dTRIM37	TRIM37	1.39219
1	54	dTRIM37	TRIM37	2.06859
1	54	dTRIM37	TRIM37	1.21065
1	54	dTRIM37	TRIM37	3.41149
1	54	dTRIM37	TRIM37	0.843122
1	55	dTRIM37	TRIM37	2.50546
1	55	dTRIM37	TRIM37	2.99083
1	55	dTRIM37	TRIM37	5.76594
1	55	dTRIM37	TRIM37	2.89271
1	55	dTRIM37	TRIM37	2.88582
1	55	dTRIM37	TRIM37	0.769894
1	55	dTRIM37	TRIM37	7.55668
1	55	dTRIM37	TRIM37	3.18729
1	55	dTRIM37	TRIM37	5.74734
1	55	dTRIM37	TRIM37	11.4161
1	55	dTRIM37	TRIM37	4.31664
1	55	dTRIM37	TRIM37	4.19651
1	55	dTRIM37	TRIM37	2.31052
1	55	dTRIM37	TRIM37	2.20365
1	56	dTRIM37	TRIM37	4.59548
1	56	dTRIM37	TRIM37	2.60079
1	56	dTRIM37	TRIM37	2.25374
1	56	dTRIM37	TRIM37	3.12436
1	56	dTRIM37	TRIM37	5.37076
1	56	dTRIM37	TRIM37	9.41215
1	56	dTRIM37	TRIM37	6.5532
1	56	dTRIM37	TRIM37	2.54739
1	56	dTRIM37	TRIM37	5.55697
1	56	dTRIM37	TRIM37	1.35848
1	56	dTRIM37	TRIM37	5.02815
1	56	dTRIM37	TRIM37	2.66673
1	56	dTRIM37	TRIM37	1.09587
1	56	dTRIM37	TRIM37	1.88008
1	57	dTRIM37	TRIM37	2.63641
1	57	dTRIM37	TRIM37	2.54755
1	57	dTRIM37	TRIM37	2.33468
1	57	dTRIM37	TRIM37	2.46468
1	57	dTRIM37	TRIM37	3.96085
1	57	dTRIM37	TRIM37	2.48399
1	57	dTRIM37	TRIM37	4.54751
1	57	dTRIM37	TRIM37	4.61949
1	57	dTRIM37	TRIM37	1.30831
1	57	dTRIM37	TRIM37	4.11031
1	57	dTRIM37	TRIM37	3.78537
1	57	dTRIM37	TRIM37	2.15859
1	57	dTRIM37	TRIM37	0.623514
1	57	dTRIM37	TRIM37	2.03337
1	57	dTRIM37	TRIM37	7.89656
1	57	dTRIM37	TRIM37	1.72526
1	57	dTRIM37	TRIM37	1.34702
1	58	dTRIM37	TRIM37	2.74652
1	58	dTRIM37	TRIM37	3.87596
1	58	dTRIM37	TRIM37	0.650401
1	58	dTRIM37	TRIM37	3.56384
1	58	dTRIM37	TRIM37	2.51679
1	58	dTRIM37	TRIM37	4.57404
1	58	dTRIM37	TRIM37	4.53845
1	58	dTRIM37	TRIM37	7.49276
1	58	dTRIM37	TRIM37	2.79576
1	58	dTRIM37	TRIM37	4.43526
1	58	dTRIM37	TRIM37	0.273777
1	58	dTRIM37	TRIM37	4.26015
1	58	dTRIM37	TRIM37	1.95044
1	58	dTRIM37	TRIM37	1.86793
1	58	dTRIM37	TRIM37	2.25728
1	59	dTRIM37	TRIM37	3.50893
1	59	dTRIM37	TRIM37	2.13175
1	59	dTRIM37	TRIM37	6.08779
1	59	dTRIM37	TRIM37	0.0628824
1	59	dTRIM37	TRIM37	2.9467
1	59	dTRIM37	TRIM37	4.34987
1	59	dTRIM37	TRIM37	1.21096
1	59	dTRIM37	TRIM37	5.72178
1	59	dTRIM37	TRIM37	2.25954
1	59	dTRIM37	TRIM37	1.81846
1	59	dTRIM37	TRIM37	2.39495
1	59	dTRIM37	TRIM37	2.17217
1	59	dTRIM37	TRIM37	4.89212
1	59	dTRIM37	TRIM37	0.106752
1	60	dTRIM37	TRIM37	3.07965
1	60	dTRIM37	TRIM37	3.5337
1	60	dTRIM37	TRIM37	1.23253
1	60	dTRIM37	TRIM37	2.19536
1	60	dTRIM37	TRIM37	1.0443
1	60	dTRIM37	TRIM37	2.8773
1	60	dTRIM37	TRIM37	2.73748
1	60	dTRIM37	TRIM37	3.66918
1	60	dTRIM37	TRIM37	2.22101
1	60	dTRIM37	TRIM37	1.99559
1	60	dTRIM37	TRIM37	1.99899
1	60	dTRIM37	TRIM37	0.435767
1	60	dTRIM37	TRIM37	4.63224
1	60	dTRIM37	TRIM37	5.72076
1	60	dTRIM37	TRIM37	2.3425
1	60	dTRIM37	TRIM37	1.27375
1	60	dTRIM37	TRIM37	0.872374
1	61	WT	CON	0.227771
1	61	WT	CON	5.82342
1	61	WT	CON	16.0432
1	61	WT	CON	11.6683
1	61	WT	CON	5.82716
1	62	WT	CON	0.321675
1	62	WT	CON	7.53332
1	62	WT	CON	7.38581
1	62	WT	CON	14.8042
1	62	WT	CON	5.69145
1	62	WT	CON	7.14916
1	62	WT	CON	6.52062
1	63	WT	CON	9.45759
1	63	WT	CON	7.21099
1	63	WT	CON	13.7615
1	63	WT	CON	1.6995
1	63	WT	CON	4.00018
1	63	WT	CON	7.73097
1	63	WT	CON	7.76524
1	63	WT	CON	0.253407
1	63	WT	CON	9.38041
1	64	WT	CON	8.77919
1	64	WT	CON	11.4441
1	64	WT	CON	5.53271
1	64	WT	CON	5.97931
1	64	WT	CON	7.90994
1	64	WT	CON	8.8817
1	64	WT	CON	6.59429
1	64	WT	CON	2.17812
1	64	WT	CON	4.72682
1	64	WT	CON	1.93887
1	65	WT	CON	7.03227
1	65	WT	CON	8.4562
1	65	WT	CON	12.2609
1	65	WT	CON	16.4497
1	65	WT	CON	9.59448
1	65	WT	CON	4.32345
1	65	WT	CON	3.56909
1	66	WT	CON	5.93173
1	66	WT	CON	2.15161
1	66	WT	CON	7.01605
1	66	WT	CON	10.9096
1	66	WT	CON	10.805
1	66	WT	CON	7.33184
1	67	WT	CON	5.8571
1	67	WT	CON	7.31516
1	67	WT	CON	12.5486
1	67	WT	CON	8.44347
1	67	WT	CON	0.557656
1	67	WT	CON	7.00217
1	68	WT	CON	0.265476
1	68	WT	CON	0.306127
1	68	WT	CON	8.87219
1	68	WT	CON	5.76756
1	68	WT	CON	0.866651
1	68	WT	CON	0.0689708
1	68	WT	CON	2.88901
1	68	WT	CON	9.25718
1	68	WT	CON	6.88353
1	68	WT	CON	0.107393
1	68	WT	CON	0.735805
1	68	WT	CON	0.334752
1	69	WT	CON	0.147692
1	69	WT	CON	8.28937
1	69	WT	CON	6.17426
1	69	WT	CON	8.94643
1	69	WT	CON	0.36846
1	69	WT	CON	8.47027
1	69	WT	CON	0.20882
1	70	WT	CON	0.0906538
1	70	WT	CON	12.3839
1	70	WT	CON	9.17971
1	70	WT	CON	7.22618
1	70	WT	CON	0.380163
1	70	WT	CON	9.79055
1	70	WT	CON	0.901656
1	70	WT	CON	9.58532
1	70	WT	CON	4.82509
1	71	WT	CON	6.79075
1	71	WT	CON	9.33533
1	71	WT	CON	5.04689
1	71	WT	CON	7.71128
1	72	WT	CON	3.73582
1	72	WT	CON	4.43919
1	72	WT	CON	4.91626
1	72	WT	CON	3.43088
1	72	WT	CON	4.29471
1	72	WT	CON	5.10896
1	72	WT	CON	2.81976
1	73	WT	CON	9.9014
1	73	WT	CON	10.8451
1	73	WT	CON	11.2544
1	73	WT	CON	3.8322
1	73	WT	CON	5.88086
1	73	WT	CON	4.45716
1	73	WT	CON	4.52006
1	73	WT	CON	5.62597
1	74	WT	CON	6.67706
1	74	WT	CON	6.43957
1	74	WT	CON	0.648753
1	74	WT	CON	7.97211
1	74	WT	CON	5.8246
1	74	WT	CON	10.6767
1	74	WT	CON	4.44483
1	74	WT	CON	0.0960708
1	74	WT	CON	0.182818
1	75	WT	CON	0.838956
1	75	WT	CON	0.207935
1	75	WT	CON	0.0706645
1	75	WT	CON	2.1254
1	75	WT	CON	0.972229
1	75	WT	CON	0.073228
1	75	WT	CON	1.61749
1	75	WT	CON	1.00706
1	75	WT	CON	0.923354
1	75	WT	CON	0.408881
1	75	WT	CON	1.47523
1	75	WT	CON	1.58848
1	75	WT	CON	0.947829
1	76	WT	CON	8.78907
1	76	WT	CON	5.25466
1	76	WT	CON	11.7453
1	76	WT	CON	10.5859
1	76	WT	CON	8.48185
1	76	WT	CON	3.41276
1	77	WT	CON	15.4128
1	77	WT	CON	5.59289
1	77	WT	CON	8.74841
1	77	WT	CON	1.11017
1	77	WT	CON	8.73857
1	77	WT	CON	6.0737
1	77	WT	CON	7.66769
1	77	WT	CON	0.232273
1	78	WT	CON	5.22052
1	78	WT	CON	8.82736
1	78	WT	CON	7.06596
1	78	WT	CON	8.0141
1	78	WT	CON	9.75344
1	78	WT	CON	5.45505
1	78	WT	CON	7.81529
1	78	WT	CON	3.30936
1	78	WT	CON	6.62712
1	79	WT	CON	0.0384985
1	79	WT	CON	9.84306
1	79	WT	CON	15.4097
1	79	WT	CON	11.9988
1	79	WT	CON	8.7386
1	79	WT	CON	5.75001
1	79	WT	CON	10.116
1	80	WT	CON	0.230732
1	80	WT	CON	12.7258
1	80	WT	CON	0.0634775
1	80	WT	CON	0.342382
1	80	WT	CON	9.81698
1	80	WT	CON	6.26349
1	80	WT	CON	7.51049
1	80	WT	CON	9.60034
1	80	WT	CON	5.65293
1	80	WT	CON	0.294926
1	80	WT	CON	5.49996
1	81	WT	CON	7.22647
1	81	WT	CON	9.45873
1	81	WT	CON	7.28925
1	81	WT	CON	8.89073
1	81	WT	CON	5.17041
1	81	WT	CON	8.38013
1	82	WT	CON	6.45872
1	82	WT	CON	1.71432
1	82	WT	CON	0.246967
1	82	WT	CON	0.556451
1	82	WT	CON	11.0597
1	82	WT	CON	0.0405432
1	82	WT	CON	6.81714
1	82	WT	CON	8.70459
1	82	WT	CON	9.16724
1	82	WT	CON	4.15886
1	83	WT	CON	5.37331
1	83	WT	CON	7.10983
1	83	WT	CON	6.6493
1	83	WT	CON	9.67253
1	83	WT	CON	0.26154
1	83	WT	CON	8.17603
1	83	WT	CON	6.85336
1	83	WT	CON	0.536187
1	84	WT	CON	8.17765
1	84	WT	CON	1.43325
1	84	WT	CON	3.83842
1	84	WT	CON	8.56637
1	84	WT	CON	7.1498
1	84	WT	CON	3.59924
1	84	WT	CON	8.52329
1	84	WT	CON	0.661875
1	85	WT	CON	7.81782
1	85	WT	CON	17.8245
1	85	WT	CON	6.83322
1	85	WT	CON	0.739681
1	85	WT	CON	5.44172
1	86	WT	CON	0.0432898
1	86	WT	CON	0.0501412
1	86	WT	CON	7.07054
1	86	WT	CON	5.67277
1	86	WT	CON	2.63557
1	86	WT	CON	5.4569
1	86	WT	CON	0.271687
1	86	WT	CON	4.92993
1	86	WT	CON	0.135714
1	86	WT	CON	7.36162
1	86	WT	CON	5.79158
1	87	WT	CON	4.75836
1	87	WT	CON	8.97696
1	87	WT	CON	9.29497
1	87	WT	CON	6.42824
1	87	WT	CON	4.87358
1	87	WT	CON	4.54562
1	88	WT	CON	1.50399
1	88	WT	CON	6.26584
1	88	WT	CON	11.2515
1	88	WT	CON	10.9575
1	88	WT	CON	7.62202
1	88	WT	CON	7.57987
1	88	WT	CON	2.81798
1	88	WT	CON	5.73442
1	89	WT	CON	20.193
1	89	WT	CON	13.3757
1	89	WT	CON	12.1287
1	89	WT	CON	5.47172
1	89	WT	CON	4.14087
1	89	WT	CON	5.76155
1	89	WT	CON	4.50666
1	89	WT	CON	4.94035
1	89	WT	CON	0.597208
1	89	WT	CON	4.26754
1	89	WT	CON	1.3744
1	89	WT	CON	5.48023
1	89	WT	CON	0.0580148
1	89	WT	CON	5.14357
1	90	WT	CON	8.09091
1	90	WT	CON	9.38946
1	90	WT	CON	0.268696
1	90	WT	CON	7.62707
1	90	WT	CON	5.68339
1	90	WT	CON	6.16576
1	90	WT	CON	0.578164
1	91	WT	TRIM37	6.07704
1	91	WT	TRIM37	0.606867
1	91	WT	TRIM37	2.63532
1	91	WT	TRIM37	1.42286
1	91	WT	TRIM37	3.45509
1	91	WT	TRIM37	5.07585
1	91	WT	TRIM37	1.35174
1	91	WT	TRIM37	2.74617
1	91	WT	TRIM37	1.01321
1	92	WT	TRIM37	0.952544
1	92	WT	TRIM37	5.28402
1	92	WT	TRIM37	6.7285
1	92	WT	TRIM37	7.41649
1	92	WT	TRIM37	4.26989
1	92	WT	TRIM37	6.9249
1	92	WT	TRIM37	5.9183
1	92	WT	TRIM37	2.75506
1	92	WT	TRIM37	3.7149
1	92	WT	TRIM37	2.47147
1	92	WT	TRIM37	1.67095
1	92	WT	TRIM37	1.18729
1	93	WT	TRIM37	6.18276
1	93	WT	TRIM37	7.97127
1	93	WT	TRIM37	3.45708
1	93	WT	TRIM37	3.05821
1	93	WT	TRIM37	2.51725
1	93	WT	TRIM37	4.25653
1	93	WT	TRIM37	5.6685
1	93	WT	TRIM37	0.567605
1	93	WT	TRIM37	3.69075
1	94	WT	TRIM37	1.61736
1	94	WT	TRIM37	1.90448
1	94	WT	TRIM37	2.59678
1	94	WT	TRIM37	3.03177
1	94	WT	TRIM37	1.46552
1	94	WT	TRIM37	3.78318
1	94	WT	TRIM37	3.60026
1	94	WT	TRIM37	2.10568
1	94	WT	TRIM37	1.5742
1	94	WT	TRIM37	2.05747
1	94	WT	TRIM37	2.71449
1	95	WT	TRIM37	2.70983
1	95	WT	TRIM37	7.34221
1	95	WT	TRIM37	2.32793
1	95	WT	TRIM37	3.31574
1	95	WT	TRIM37	2.31705
1	95	WT	TRIM37	5.79678
1	95	WT	TRIM37	2.18204
1	95	WT	TRIM37	1.85217
1	95	WT	TRIM37	4.62794
1	96	WT	TRIM37	7.25531
1	96	WT	TRIM37	4.48225
1	96	WT	TRIM37	5.32859
1	96	WT	TRIM37	3.59435
1	96	WT	TRIM37	4.17652
1	96	WT	TRIM37	2.81871
1	96	WT	TRIM37	5.3895
1	96	WT	TRIM37	3.03793
1	97	WT	TRIM37	7.48652
1	97	WT	TRIM37	2.69744
1	97	WT	TRIM37	0.232807
1	97	WT	TRIM37	0.157504
1	97	WT	TRIM37	7.89488
1	97	WT	TRIM37	0.913344
1	97	WT	TRIM37	1.07971
1	97	WT	TRIM37	0.0229191
1	97	WT	TRIM37	0.461448
1	97	WT	TRIM37	1.76294
1	97	WT	TRIM37	1.8088
1	97	WT	TRIM37	1.48437
1	98	WT	TRIM37	3.62985
1	98	WT	TRIM37	2.30753
1	98	WT	TRIM37	2.28103
1	98	WT	TRIM37	2.64611
1	98	WT	TRIM37	2.53597
1	98	WT	TRIM37	2.29474
1	98	WT	TRIM37	2.26642
1	98	WT	TRIM37	0.72958
1	98	WT	TRIM37	1.1574
1	98	WT	TRIM37	3.05287
1	98	WT	TRIM37	10.4266
1	99	WT	TRIM37	3.537
1	99	WT	TRIM37	6.63952
1	99	WT	TRIM37	5.29671
1	99	WT	TRIM37	2.10991
1	99	WT	TRIM37	5.56439
1	99	WT	TRIM37	2.20586
1	99	WT	TRIM37	1.95563
1	99	WT	TRIM37	2.37369
1	99	WT	TRIM37	3.84668
1	100	WT	TRIM37	6.16771
1	100	WT	TRIM37	6.87877
1	100	WT	TRIM37	3.58544
1	100	WT	TRIM37	2.93291
1	100	WT	TRIM37	2.44057
1	100	WT	TRIM37	3.99324
1	100	WT	TRIM37	2.34559
1	100	WT	TRIM37	3.04257
1	101	WT	TRIM37	4.30558
1	101	WT	TRIM37	6.6215
1	101	WT	TRIM37	5.17786
1	101	WT	TRIM37	2.37559
1	101	WT	TRIM37	2.64132
1	101	WT	TRIM37	0.909133
1	101	WT	TRIM37	0.863996
1	101	WT	TRIM37	0.662058
1	101	WT	TRIM37	3.48223
1	101	WT	TRIM37	1.82856
1	101	WT	TRIM37	3.95851
1	102	WT	TRIM37	4.09979
1	102	WT	TRIM37	3.68669
1	102	WT	TRIM37	4.15167
1	102	WT	TRIM37	3.31328
1	102	WT	TRIM37	0.994263
1	102	WT	TRIM37	2.97395
1	102	WT	TRIM37	2.57867
1	102	WT	TRIM37	3.192
1	102	WT	TRIM37	3.04784
1	103	WT	TRIM37	1.26584
1	103	WT	TRIM37	1.33371
1	103	WT	TRIM37	2.93202
1	103	WT	TRIM37	1.79844
1	103	WT	TRIM37	1.8011
1	103	WT	TRIM37	1.66508
1	103	WT	TRIM37	1.98256
1	103	WT	TRIM37	1.16851
1	103	WT	TRIM37	1.6978
1	103	WT	TRIM37	1.53912
1	103	WT	TRIM37	1.56266
1	103	WT	TRIM37	1.84489
1	103	WT	TRIM37	1.11115
1	103	WT	TRIM37	1.3984
1	103	WT	TRIM37	2.8596
1	104	WT	TRIM37	0.771298
1	104	WT	TRIM37	7.87677
1	104	WT	TRIM37	1.23519
1	104	WT	TRIM37	3.03371
1	104	WT	TRIM37	3.65126
1	104	WT	TRIM37	4.04109
1	104	WT	TRIM37	2.99286
1	104	WT	TRIM37	0.864836
1	105	WT	TRIM37	5.6954
1	105	WT	TRIM37	3.64173
1	105	WT	TRIM37	4.19078
1	105	WT	TRIM37	7.04642
1	105	WT	TRIM37	7.11804
1	105	WT	TRIM37	3.39089
1	105	WT	TRIM37	3.81317
1	105	WT	TRIM37	2.7189
1	105	WT	TRIM37	2.10242
1	105	WT	TRIM37	2.46033
1	105	WT	TRIM37	5.17568
1	106	WT	TRIM37	1.6406
1	106	WT	TRIM37	1.20604
1	106	WT	TRIM37	2.75206
1	106	WT	TRIM37	5.48812
1	106	WT	TRIM37	5.98659
1	106	WT	TRIM37	3.50106
1	106	WT	TRIM37	4.38224
1	106	WT	TRIM37	3.33471
1	106	WT	TRIM37	0.531426
1	106	WT	TRIM37	1.90161
1	106	WT	TRIM37	1.82051
1	106	WT	TRIM37	3.70375
1	106	WT	TRIM37	3.16181
1	107	WT	TRIM37	18.456
1	107	WT	TRIM37	2.65608
1	107	WT	TRIM37	3.95802
1	107	WT	TRIM37	4.3832
1	107	WT	TRIM37	5.66082
1	107	WT	TRIM37	9.04375
1	107	WT	TRIM37	3.14569
1	107	WT	TRIM37	4.50678
1	107	WT	TRIM37	5.12369
1	108	WT	TRIM37	0.147997
1	108	WT	TRIM37	0.113344
1	108	WT	TRIM37	2.16033
1	108	WT	TRIM37	8.69248
1	108	WT	TRIM37	2.58834
1	108	WT	TRIM37	0.801984
1	108	WT	TRIM37	3.87591
1	108	WT	TRIM37	4.49799
1	108	WT	TRIM37	3.43641
1	108	WT	TRIM37	5.24674
1	108	WT	TRIM37	3.385
1	108	WT	TRIM37	1.35444
1	108	WT	TRIM37	3.123
1	108	WT	TRIM37	0.215778
1	109	WT	TRIM37	2.7765
1	109	WT	TRIM37	0.705516
1	109	WT	TRIM37	2.71653
1	109	WT	TRIM37	12.8141
1	109	WT	TRIM37	0.990326
1	109	WT	TRIM37	4.82501
1	109	WT	TRIM37	0.957885
1	109	WT	TRIM37	0.489143
1	109	WT	TRIM37	0.0348516
1	109	WT	TRIM37	1.56507
1	109	WT	TRIM37	2.69046
1	110	WT	TRIM37	4.22554
1	110	WT	TRIM37	1.2293
1	110	WT	TRIM37	0.973678
1	110	WT	TRIM37	9.89377
1	110	WT	TRIM37	2.26215
1	110	WT	TRIM37	5.28772
1	110	WT	TRIM37	0.230228
1	110	WT	TRIM37	1.13605
1	110	WT	TRIM37	2.92189
1	110	WT	TRIM37	1.69169
1	110	WT	TRIM37	1.77488
1	110	WT	TRIM37	2.79214
1	110	WT	TRIM37	1.10092
1	110	WT	TRIM37	1.27604
1	110	WT	TRIM37	6.50442
1	111	WT	TRIM37	2.09049
1	111	WT	TRIM37	0.310643
1	111	WT	TRIM37	0.533761
1	111	WT	TRIM37	0.68455
1	111	WT	TRIM37	3.52854
1	111	WT	TRIM37	3.03287
1	111	WT	TRIM37	2.00383
1	111	WT	TRIM37	3.34595
1	111	WT	TRIM37	2.87285
1	111	WT	TRIM37	6.11647
1	111	WT	TRIM37	1.77394
1	111	WT	TRIM37	0.790005
1	111	WT	TRIM37	11.1502
1	112	WT	TRIM37	3.02411
1	112	WT	TRIM37	0.0870527
1	112	WT	TRIM37	0.140536
1	112	WT	TRIM37	5.61022
1	112	WT	TRIM37	1.67181
1	112	WT	TRIM37	2.74929
1	112	WT	TRIM37	1.02309
1	112	WT	TRIM37	1.75463
1	112	WT	TRIM37	0.825849
1	112	WT	TRIM37	5.0186
1	112	WT	TRIM37	3.59083
1	112	WT	TRIM37	0.682826
1	112	WT	TRIM37	0.893355
1	112	WT	TRIM37	1.53545
1	112	WT	TRIM37	2.08023
1	113	WT	TRIM37	9.72802
1	113	WT	TRIM37	4.21939
1	113	WT	TRIM37	2.96466
1	113	WT	TRIM37	5.12523
1	113	WT	TRIM37	0.715221
1	113	WT	TRIM37	0.781277
1	113	WT	TRIM37	2.34221
1	113	WT	TRIM37	1.76521
1	113	WT	TRIM37	2.96184
1	113	WT	TRIM37	4.506
1	113	WT	TRIM37	3.62332
1	113	WT	TRIM37	5.9865
1	113	WT	TRIM37	1.60977
1	113	WT	TRIM37	0.426047
1	113	WT	TRIM37	2.65132
1	114	WT	TRIM37	3.33693
1	114	WT	TRIM37	6.69517
1	114	WT	TRIM37	4.30025
1	114	WT	TRIM37	1.84863
1	114	WT	TRIM37	3.51261
1	114	WT	TRIM37	8.83355
1	114	WT	TRIM37	0.177996
1	114	WT	TRIM37	2.03973
1	114	WT	TRIM37	3.37954
1	115	WT	TRIM37	0.22002
1	115	WT	TRIM37	2.66752
1	115	WT	TRIM37	3.65901
1	115	WT	TRIM37	3.11463
1	115	WT	TRIM37	2.37417
1	115	WT	TRIM37	3.07672
1	115	WT	TRIM37	3.77324
1	115	WT	TRIM37	3.18654
1	115	WT	TRIM37	3.67878
1	115	WT	TRIM37	4.5603
1	115	WT	TRIM37	0.208957
1	115	WT	TRIM37	0.942916
1	115	WT	TRIM37	4.63848
1	116	WT	TRIM37	1.82774
1	116	WT	TRIM37	6.14441
1	116	WT	TRIM37	2.49708
1	116	WT	TRIM37	3.42704
1	116	WT	TRIM37	0.0785077
1	116	WT	TRIM37	3.25715
1	116	WT	TRIM37	5.52404
1	117	WT	TRIM37	1.63221
1	117	WT	TRIM37	2.77246
1	117	WT	TRIM37	2.65162
1	117	WT	TRIM37	2.77617
1	117	WT	TRIM37	4.35941
1	117	WT	TRIM37	1.8699
1	117	WT	TRIM37	1.14342
1	117	WT	TRIM37	4.19112
1	117	WT	TRIM37	8.22469
1	117	WT	TRIM37	11.0986
1	117	WT	TRIM37	3.30773
1	117	WT	TRIM37	0.422461
1	117	WT	TRIM37	0.346685
1	117	WT	TRIM37	5.73519
1	117	WT	TRIM37	1.48458
1	117	WT	TRIM37	5.43836
1	117	WT	TRIM37	0.292119
1	117	WT	TRIM37	4.54107
1	118	WT	TRIM37	3.10863
1	118	WT	TRIM37	3.90149
1	118	WT	TRIM37	8.13599
1	118	WT	TRIM37	5.13271
1	118	WT	TRIM37	3.20998
1	118	WT	TRIM37	3.50237
1	118	WT	TRIM37	3.9655
1	118	WT	TRIM37	2.2114
1	118	WT	TRIM37	3.62013
1	118	WT	TRIM37	2.86447
1	119	WT	TRIM37	1.21315
1	119	WT	TRIM37	0.283619
1	119	WT	TRIM37	3.96782
1	119	WT	TRIM37	3.70033
1	119	WT	TRIM37	0.217807
1	119	WT	TRIM37	4.2978
1	119	WT	TRIM37	1.34812
1	119	WT	TRIM37	3.09297
1	119	WT	TRIM37	1.69851
1	119	WT	TRIM37	2.66658
1	119	WT	TRIM37	0.0784009
1	119	WT	TRIM37	2.52508
1	119	WT	TRIM37	2.13249
1	120	WT	TRIM37	5.68521
1	120	WT	TRIM37	3.47414
1	120	WT	TRIM37	2.75584
1	120	WT	TRIM37	1.93614
1	120	WT	TRIM37	1.98367
1	120	WT	TRIM37	1.70951
1	120	WT	TRIM37	3.11736
1	120	WT	TRIM37	1.9783
1	120	WT	TRIM37	1.31633
2	1	dTRIM37	CON	2.6011
2	1	dTRIM37	CON	5.38555
2	1	dTRIM37	CON	4.31492
2	1	dTRIM37	CON	2.01865
2	1	dTRIM37	CON	2.37212
2	1	dTRIM37	CON	1.98273
2	1	dTRIM37	CON	5.36703
2	1	dTRIM37	CON	3.87149
2	1	dTRIM37	CON	4.0269
2	1	dTRIM37	CON	4.27347
2	2	dTRIM37	CON	5.38372
2	2	dTRIM37	CON	3.61259
2	2	dTRIM37	CON	4.91594
2	2	dTRIM37	CON	3.29464
2	2	dTRIM37	CON	5.16942
2	2	dTRIM37	CON	0.141741
2	3	dTRIM37	CON	11.5154
2	3	dTRIM37	CON	8.59136
2	3	dTRIM37	CON	5.03207
2	3	dTRIM37	CON	5.94313
2	3	dTRIM37	CON	6.70393
2	3	dTRIM37	CON	10.0466
2	3	dTRIM37	CON	3.7268
2	3	dTRIM37	CON	3.27341
2	3	dTRIM37	CON	1.0221
2	4	dTRIM37	CON	6.20079
2	4	dTRIM37	CON	5.4918
2	4	dTRIM37	CON	0.0459907
2	4	dTRIM37	CON	3.1013
2	4	dTRIM37	CON	2.06221
2	4	dTRIM37	CON	5.20659
2	4	dTRIM37	CON	3.84289
2	4	dTRIM37	CON	2.04591
2	5	dTRIM37	CON	2.50562
2	5	dTRIM37	CON	4.95579
2	5	dTRIM37	CON	2.42296
2	5	dTRIM37	CON	2.9478
2	5	dTRIM37	CON	1.11359
2	5	dTRIM37	CON	0.428275
2	5	dTRIM37	CON	1.81213
2	5	dTRIM37	CON	3.09906
2	5	dTRIM37	CON	2.62238
2	5	dTRIM37	CON	3.71965
2	6	dTRIM37	CON	3.44144
2	6	dTRIM37	CON	9.20182
2	6	dTRIM37	CON	5.04898
2	6	dTRIM37	CON	2.77044
2	6	dTRIM37	CON	4.08768
2	6	dTRIM37	CON	4.32125
2	6	dTRIM37	CON	2.98524
2	7	dTRIM37	CON	6.26076
2	7	dTRIM37	CON	1.56945
2	7	dTRIM37	CON	4.70759
2	7	dTRIM37	CON	5.32125
2	7	dTRIM37	CON	4.57444
2	7	dTRIM37	CON	2.72486
2	7	dTRIM37	CON	3.45084
2	7	dTRIM37	CON	2.01341
2	8	dTRIM37	CON	5.20145
2	8	dTRIM37	CON	8.20795
2	8	dTRIM37	CON	4.89056
2	8	dTRIM37	CON	4.29017
2	8	dTRIM37	CON	0.877378
2	8	dTRIM37	CON	0.029572
2	8	dTRIM37	CON	3.23745
2	8	dTRIM37	CON	5.08965
2	8	dTRIM37	CON	3.32125
2	8	dTRIM37	CON	2.49186
2	8	dTRIM37	CON	4.63322
2	9	dTRIM37	CON	0.219501
2	9	dTRIM37	CON	0.405127
2	9	dTRIM37	CON	2.79222
2	9	dTRIM37	CON	3.9837
2	9	dTRIM37	CON	4.81065
2	9	dTRIM37	CON	1.01277
2	9	dTRIM37	CON	4.62319
2	9	dTRIM37	CON	0.511681
2	9	dTRIM37	CON	4.38097
2	9	dTRIM37	CON	4.43835
2	9	dTRIM37	CON	2.98181
2	9	dTRIM37	CON	4.75804
2	9	dTRIM37	CON	3.12787
2	9	dTRIM37	CON	3.79614
2	9	dTRIM37	CON	4.21707
2	10	dTRIM37	CON	6.7711
2	10	dTRIM37	CON	3.46365
2	10	dTRIM37	CON	4.11975
2	10	dTRIM37	CON	3.03479
2	10	dTRIM37	CON	6.18685
2	10	dTRIM37	CON	1.91983
2	10	dTRIM37	CON	2.24703
2	10	dTRIM37	CON	0.188373
2	10	dTRIM37	CON	6.89303
2	11	dTRIM37	CON	6.04871
2	11	dTRIM37	CON	2.58265
2	11	dTRIM37	CON	4.2714
2	11	dTRIM37	CON	3.84239
2	11	dTRIM37	CON	4.59422
2	11	dTRIM37	CON	2.9218
2	12	dTRIM37	CON	0.267384
2	12	dTRIM37	CON	4.13506
2	12	dTRIM37	CON	5.50887
2	12	dTRIM37	CON	6.4921
2	12	dTRIM37	CON	2.0515
2	12	dTRIM37	CON	2.34661
2	12	dTRIM37	CON	5.07715
2	13	dTRIM37	CON	7.95822
2	13	dTRIM37	CON	11.8549
2	13	dTRIM37	CON	5.10219
2	13	dTRIM37	CON	11.0016
2	13	dTRIM37	CON	3.05994
2	13	dTRIM37	CON	9.269
2	13	dTRIM37	CON	6.67927
2	13	dTRIM37	CON	8.46703
2	13	dTRIM37	CON	9.08099
2	13	dTRIM37	CON	6.05835
2	13	dTRIM37	CON	6.74643
2	14	dTRIM37	CON	3.85672
2	14	dTRIM37	CON	1.79586
2	14	dTRIM37	CON	13.868
2	14	dTRIM37	CON	3.18105
2	14	dTRIM37	CON	5.05341
2	14	dTRIM37	CON	7.86304
2	14	dTRIM37	CON	0.595773
2	14	dTRIM37	CON	3.90643
2	14	dTRIM37	CON	0.146456
2	14	dTRIM37	CON	5.43786
2	14	dTRIM37	CON	3.21265
2	14	dTRIM37	CON	2.29368
2	14	dTRIM37	CON	3.41129
2	14	dTRIM37	CON	2.35218
2	15	dTRIM37	CON	2.65344
2	15	dTRIM37	CON	6.63601
2	15	dTRIM37	CON	4.82977
2	15	dTRIM37	CON	3.12345
2	15	dTRIM37	CON	6.4103
2	15	dTRIM37	CON	1.79507
2	15	dTRIM37	CON	1.60739
2	15	dTRIM37	CON	7.66578
2	15	dTRIM37	CON	1.84683
2	15	dTRIM37	CON	5.34099
2	15	dTRIM37	CON	2.84627
2	15	dTRIM37	CON	0.534463
2	16	dTRIM37	CON	6.73082
2	16	dTRIM37	CON	0.881727
2	16	dTRIM37	CON	4.62683
2	16	dTRIM37	CON	14.1877
2	16	dTRIM37	CON	12.5487
2	16	dTRIM37	CON	7.0573
2	16	dTRIM37	CON	6.70028
2	17	dTRIM37	CON	18.7417
2	17	dTRIM37	CON	8.49625
2	17	dTRIM37	CON	5.84804
2	17	dTRIM37	CON	6.53529
2	17	dTRIM37	CON	6.55227
2	17	dTRIM37	CON	8.82889
2	17	dTRIM37	CON	6.9169
2	17	dTRIM37	CON	9.87356
2	17	dTRIM37	CON	8.44572
2	17	dTRIM37	CON	4.34137
2	17	dTRIM37	CON	11.2872
2	18	dTRIM37	CON	9.04683
2	18	dTRIM37	CON	9.53208
2	18	dTRIM37	CON	4.41318
2	18	dTRIM37	CON	5.84266
2	18	dTRIM37	CON	4.09042
2	18	dTRIM37	CON	2.32258
2	18	dTRIM37	CON	3.25924
2	18	dTRIM37	CON	4.38907
2	18	dTRIM37	CON	4.0623
2	20	dTRIM37	CON	0.658747
2	20	dTRIM37	CON	0.409384
2	20	dTRIM37	CON	3.16675
2	20	dTRIM37	CON	4.97694
2	20	dTRIM37	CON	3.25241
2	20	dTRIM37	CON	0.47837
2	20	dTRIM37	CON	6.05553
2	20	dTRIM37	CON	5.54983
2	20	dTRIM37	CON	4.28148
2	21	dTRIM37	TRIM37	0.180209
2	21	dTRIM37	TRIM37	5.65318
2	21	dTRIM37	TRIM37	12.3942
2	21	dTRIM37	TRIM37	3.49728
2	21	dTRIM37	TRIM37	5.37699
2	21	dTRIM37	TRIM37	0.207446
2	21	dTRIM37	TRIM37	7.29021
2	21	dTRIM37	TRIM37	4.92235
2	21	dTRIM37	TRIM37	9.3274
2	21	dTRIM37	TRIM37	16.0321
2	21	dTRIM37	TRIM37	10.1763
2	21	dTRIM37	TRIM37	5.84001
2	21	dTRIM37	TRIM37	5.41608
2	21	dTRIM37	TRIM37	7.52432
2	21	dTRIM37	TRIM37	12.4085
2	21	dTRIM37	TRIM37	5.29853
2	21	dTRIM37	TRIM37	9.75164
2	21	dTRIM37	TRIM37	9.60565
2	22	dTRIM37	TRIM37	3.01247
2	22	dTRIM37	TRIM37	4.72926
2	22	dTRIM37	TRIM37	4.85949
2	22	dTRIM37	TRIM37	4.40583
2	22	dTRIM37	TRIM37	8.09227
2	22	dTRIM37	TRIM37	1.07726
2	22	dTRIM37	TRIM37	0.286137
2	22	dTRIM37	TRIM37	1.64561
2	22	dTRIM37	TRIM37	2.64088
2	22	dTRIM37	TRIM37	5.53826
2	22	dTRIM37	TRIM37	0.361807
2	22	dTRIM37	TRIM37	0.33164
2	22	dTRIM37	TRIM37	2.48615
2	22	dTRIM37	TRIM37	4.41982
2	22	dTRIM37	TRIM37	5.32993
2	22	dTRIM37	TRIM37	1.98492
2	23	dTRIM37	TRIM37	2.77003
2	23	dTRIM37	TRIM37	1.89715
2	23	dTRIM37	TRIM37	1.93057
2	23	dTRIM37	TRIM37	1.75898
2	23	dTRIM37	TRIM37	3.60169
2	23	dTRIM37	TRIM37	3.4164
2	23	dTRIM37	TRIM37	4.26326
2	23	dTRIM37	TRIM37	2.95018
2	23	dTRIM37	TRIM37	5.98518
2	23	dTRIM37	TRIM37	2.21321
2	23	dTRIM37	TRIM37	1.93066
2	23	dTRIM37	TRIM37	4.38711
2	23	dTRIM37	TRIM37	2.92827
2	23	dTRIM37	TRIM37	2.61415
2	23	dTRIM37	TRIM37	3.36797
2	23	dTRIM37	TRIM37	0.965011
2	24	dTRIM37	TRIM37	2.8058
2	24	dTRIM37	TRIM37	5.46395
2	24	dTRIM37	TRIM37	5.27034
2	24	dTRIM37	TRIM37	2.87517
2	24	dTRIM37	TRIM37	3.27291
2	24	dTRIM37	TRIM37	4.28725
2	24	dTRIM37	TRIM37	3.50924
2	24	dTRIM37	TRIM37	4.00795
2	24	dTRIM37	TRIM37	1.26999
2	24	dTRIM37	TRIM37	2.37871
2	24	dTRIM37	TRIM37	2.37058
2	24	dTRIM37	TRIM37	2.65383
2	24	dTRIM37	TRIM37	3.60243
2	25	dTRIM37	TRIM37	1.21978
2	25	dTRIM37	TRIM37	1.81555
2	25	dTRIM37	TRIM37	2.4625
2	25	dTRIM37	TRIM37	8.45161
2	25	dTRIM37	TRIM37	0.275578
2	25	dTRIM37	TRIM37	2.50748
2	25	dTRIM37	TRIM37	3.30941
2	25	dTRIM37	TRIM37	2.03839
2	25	dTRIM37	TRIM37	2.55836
2	25	dTRIM37	TRIM37	2.69004
2	25	dTRIM37	TRIM37	0.219959
2	25	dTRIM37	TRIM37	4.73184
2	25	dTRIM37	TRIM37	0.567178
2	25	dTRIM37	TRIM37	4.17856
2	25	dTRIM37	TRIM37	1.60386
2	25	dTRIM37	TRIM37	0.663554
2	25	dTRIM37	TRIM37	3.43211
2	26	dTRIM37	TRIM37	2.90185
2	26	dTRIM37	TRIM37	0.836362
2	26	dTRIM37	TRIM37	5.71981
2	26	dTRIM37	TRIM37	3.1275
2	26	dTRIM37	TRIM37	0.066453
2	26	dTRIM37	TRIM37	1.31597
2	26	dTRIM37	TRIM37	1.8528
2	26	dTRIM37	TRIM37	2.49662
2	26	dTRIM37	TRIM37	2.9228
2	26	dTRIM37	TRIM37	4.31814
2	26	dTRIM37	TRIM37	9.98451
2	26	dTRIM37	TRIM37	5.40732
2	26	dTRIM37	TRIM37	4.01784
2	26	dTRIM37	TRIM37	11.3022
2	26	dTRIM37	TRIM37	3.35222
2	26	dTRIM37	TRIM37	2.27634
2	26	dTRIM37	TRIM37	2.79701
2	26	dTRIM37	TRIM37	4.24425
2	27	dTRIM37	TRIM37	10.6647
2	27	dTRIM37	TRIM37	7.76719
2	27	dTRIM37	TRIM37	4.47361
2	27	dTRIM37	TRIM37	7.59536
2	27	dTRIM37	TRIM37	1.75167
2	27	dTRIM37	TRIM37	5.39777
2	27	dTRIM37	TRIM37	4.61868
2	27	dTRIM37	TRIM37	4.98033
2	27	dTRIM37	TRIM37	2.6276
2	27	dTRIM37	TRIM37	0.0610208
2	27	dTRIM37	TRIM37	3.68849
2	27	dTRIM37	TRIM37	4.11524
2	27	dTRIM37	TRIM37	3.7624
2	27	dTRIM37	TRIM37	3.98482
2	27	dTRIM37	TRIM37	4.85383
2	27	dTRIM37	TRIM37	6.82654
2	27	dTRIM37	TRIM37	3.65975
2	28	dTRIM37	TRIM37	3.90317
2	28	dTRIM37	TRIM37	0.677485
2	28	dTRIM37	TRIM37	5.04804
2	28	dTRIM37	TRIM37	4.55546
2	28	dTRIM37	TRIM37	1.77812
2	28	dTRIM37	TRIM37	2.91563
2	28	dTRIM37	TRIM37	9.98071
2	28	dTRIM37	TRIM37	2.05649
2	28	dTRIM37	TRIM37	2.1893
2	28	dTRIM37	TRIM37	3.555
2	28	dTRIM37	TRIM37	2.39936
2	28	dTRIM37	TRIM37	9.63044
2	28	dTRIM37	TRIM37	3.53883
2	28	dTRIM37	TRIM37	1.84096
2	28	dTRIM37	TRIM37	2.47536
2	28	dTRIM37	TRIM37	1.8562
2	28	dTRIM37	TRIM37	2.09987
2	28	dTRIM37	TRIM37	6.10683
2	28	dTRIM37	TRIM37	1.81291
2	28	dTRIM37	TRIM37	2.99358
2	28	dTRIM37	TRIM37	1.83264
2	28	dTRIM37	TRIM37	2.15273
2	28	dTRIM37	TRIM37	2.88791
2	28	dTRIM37	TRIM37	1.8235
2	28	dTRIM37	TRIM37	0.795773
2	28	dTRIM37	TRIM37	1.48879
2	28	dTRIM37	TRIM37	5.78025
2	28	dTRIM37	TRIM37	2.66523
2	28	dTRIM37	TRIM37	0.092668
2	29	dTRIM37	TRIM37	1.64184
2	29	dTRIM37	TRIM37	6.28539
2	29	dTRIM37	TRIM37	1.32622
2	29	dTRIM37	TRIM37	0.292943
2	29	dTRIM37	TRIM37	1.55683
2	29	dTRIM37	TRIM37	1.31392
2	29	dTRIM37	TRIM37	2.39307
2	29	dTRIM37	TRIM37	3.32233
2	29	dTRIM37	TRIM37	3.16751
2	29	dTRIM37	TRIM37	0.786069
2	29	dTRIM37	TRIM37	2.62786
2	29	dTRIM37	TRIM37	2.69963
2	29	dTRIM37	TRIM37	11.5651
2	29	dTRIM37	TRIM37	3.70771
2	29	dTRIM37	TRIM37	1.37362
2	29	dTRIM37	TRIM37	0.085832
2	29	dTRIM37	TRIM37	2.46622
2	29	dTRIM37	TRIM37	3.2221
2	29	dTRIM37	TRIM37	2.72018
2	29	dTRIM37	TRIM37	1.34667
2	29	dTRIM37	TRIM37	1.62608
2	29	dTRIM37	TRIM37	0.174197
2	29	dTRIM37	TRIM37	3.00621
2	29	dTRIM37	TRIM37	1.88217
2	29	dTRIM37	TRIM37	2.68756
2	29	dTRIM37	TRIM37	1.93939
2	29	dTRIM37	TRIM37	1.88278
2	30	dTRIM37	TRIM37	6.02412
2	30	dTRIM37	TRIM37	3.7169
2	30	dTRIM37	TRIM37	2.06847
2	30	dTRIM37	TRIM37	1.17523
2	30	dTRIM37	TRIM37	1.41176
2	30	dTRIM37	TRIM37	8.24997
2	30	dTRIM37	TRIM37	4.43363
2	30	dTRIM37	TRIM37	4.30243
2	30	dTRIM37	TRIM37	1.76469
2	30	dTRIM37	TRIM37	2.48356
2	30	dTRIM37	TRIM37	2.84988
2	30	dTRIM37	TRIM37	4.74409
2	30	dTRIM37	TRIM37	1.90361
2	30	dTRIM37	TRIM37	5.2242
2	30	dTRIM37	TRIM37	3.25483
2	30	dTRIM37	TRIM37	2.75225
2	30	dTRIM37	TRIM37	2.21939
2	30	dTRIM37	TRIM37	1.46209
2	30	dTRIM37	TRIM37	1.66523
2	30	dTRIM37	TRIM37	2.67416
2	30	dTRIM37	TRIM37	1.06126
2	31	dTRIM37	TRIM37	6.37429
2	31	dTRIM37	TRIM37	8.29674
2	31	dTRIM37	TRIM37	3.50355
2	31	dTRIM37	TRIM37	4.64941
2	31	dTRIM37	TRIM37	14.2748
2	31	dTRIM37	TRIM37	3.52407
2	31	dTRIM37	TRIM37	8.69758
2	31	dTRIM37	TRIM37	7.84363
2	31	dTRIM37	TRIM37	6.53758
2	31	dTRIM37	TRIM37	4.57699
2	31	dTRIM37	TRIM37	1.85595
2	31	dTRIM37	TRIM37	5.15908
2	31	dTRIM37	TRIM37	5.55071
2	31	dTRIM37	TRIM37	2.11298
2	31	dTRIM37	TRIM37	4.51006
2	31	dTRIM37	TRIM37	2.70762
2	31	dTRIM37	TRIM37	5.07758
2	31	dTRIM37	TRIM37	8.20243
2	32	dTRIM37	TRIM37	1.33893
2	32	dTRIM37	TRIM37	0.757321
2	32	dTRIM37	TRIM37	1.58758
2	32	dTRIM37	TRIM37	0.739452
2	32	dTRIM37	TRIM37	1.26874
2	32	dTRIM37	TRIM37	1.34887
2	32	dTRIM37	TRIM37	1.49963
2	32	dTRIM37	TRIM37	1.97839
2	32	dTRIM37	TRIM37	2.79443
2	32	dTRIM37	TRIM37	0.806516
2	32	dTRIM37	TRIM37	2.45966
2	32	dTRIM37	TRIM37	1.96161
2	32	dTRIM37	TRIM37	0.786191
2	32	dTRIM37	TRIM37	0.864668
2	32	dTRIM37	TRIM37	1.17501
2	32	dTRIM37	TRIM37	1.01463
2	32	dTRIM37	TRIM37	1.36071
2	32	dTRIM37	TRIM37	2.91205
2	33	dTRIM37	TRIM37	2.82649
2	33	dTRIM37	TRIM37	14.3284
2	33	dTRIM37	TRIM37	7.62606
2	33	dTRIM37	TRIM37	3.91901
2	33	dTRIM37	TRIM37	10.2305
2	33	dTRIM37	TRIM37	9.34252
2	33	dTRIM37	TRIM37	3.88351
2	33	dTRIM37	TRIM37	1.86009
2	33	dTRIM37	TRIM37	7.65892
2	33	dTRIM37	TRIM37	5.7364
2	33	dTRIM37	TRIM37	4.10141
2	33	dTRIM37	TRIM37	3.31141
2	33	dTRIM37	TRIM37	4.93188
2	33	dTRIM37	TRIM37	4.03795
2	33	dTRIM37	TRIM37	1.61422
2	34	dTRIM37	TRIM37	2.99005
2	34	dTRIM37	TRIM37	2.2336
2	34	dTRIM37	TRIM37	3.11226
2	34	dTRIM37	TRIM37	4.00349
2	34	dTRIM37	TRIM37	5.05774
2	34	dTRIM37	TRIM37	1.49107
2	34	dTRIM37	TRIM37	2.20272
2	34	dTRIM37	TRIM37	3.86346
2	34	dTRIM37	TRIM37	1.73385
2	34	dTRIM37	TRIM37	1.91482
2	34	dTRIM37	TRIM37	5.91975
2	34	dTRIM37	TRIM37	4.68641
2	34	dTRIM37	TRIM37	3.22252
2	34	dTRIM37	TRIM37	3.14998
2	34	dTRIM37	TRIM37	3.23084
2	34	dTRIM37	TRIM37	3.10442
2	35	dTRIM37	TRIM37	2.09383
2	35	dTRIM37	TRIM37	3.50811
2	35	dTRIM37	TRIM37	4.63545
2	35	dTRIM37	TRIM37	2.32978
2	35	dTRIM37	TRIM37	1.3469
2	35	dTRIM37	TRIM37	1.7447
2	35	dTRIM37	TRIM37	3.09934
2	35	dTRIM37	TRIM37	1.91885
2	35	dTRIM37	TRIM37	1.49587
2	35	dTRIM37	TRIM37	5.15866
2	35	dTRIM37	TRIM37	5.43009
2	35	dTRIM37	TRIM37	2.50788
2	35	dTRIM37	TRIM37	2.69635
2	35	dTRIM37	TRIM37	2.02797
2	35	dTRIM37	TRIM37	1.34463
2	35	dTRIM37	TRIM37	4.21659
2	36	dTRIM37	TRIM37	2.71514
2	36	dTRIM37	TRIM37	4.61601
2	36	dTRIM37	TRIM37	2.00101
2	36	dTRIM37	TRIM37	3.13083
2	36	dTRIM37	TRIM37	2.00415
2	36	dTRIM37	TRIM37	4.56072
2	36	dTRIM37	TRIM37	1.08362
2	36	dTRIM37	TRIM37	4.90153
2	36	dTRIM37	TRIM37	11.6681
2	36	dTRIM37	TRIM37	2.40043
2	36	dTRIM37	TRIM37	2.24977
2	36	dTRIM37	TRIM37	4.08208
2	36	dTRIM37	TRIM37	3.28319
2	36	dTRIM37	TRIM37	1.63053
2	36	dTRIM37	TRIM37	1.09259
2	36	dTRIM37	TRIM37	0.960357
2	36	dTRIM37	TRIM37	0.784436
2	36	dTRIM37	TRIM37	0.535668
2	37	dTRIM37	TRIM37	0.409339
2	37	dTRIM37	TRIM37	2.28815
2	37	dTRIM37	TRIM37	1.16139
2	37	dTRIM37	TRIM37	2.15894
2	37	dTRIM37	TRIM37	1.25206
2	37	dTRIM37	TRIM37	2.88177
2	37	dTRIM37	TRIM37	3.1079
2	37	dTRIM37	TRIM37	2.98448
2	37	dTRIM37	TRIM37	4.72911
2	37	dTRIM37	TRIM37	1.41122
2	37	dTRIM37	TRIM37	1.58433
2	37	dTRIM37	TRIM37	1.3371
2	37	dTRIM37	TRIM37	2.46921
2	37	dTRIM37	TRIM37	3.50311
2	37	dTRIM37	TRIM37	2.57652
2	37	dTRIM37	TRIM37	4.68635
2	37	dTRIM37	TRIM37	1.50504
2	37	dTRIM37	TRIM37	4.46784
2	38	dTRIM37	TRIM37	4.40252
2	38	dTRIM37	TRIM37	2.17421
2	38	dTRIM37	TRIM37	1.98373
2	38	dTRIM37	TRIM37	1.18474
2	38	dTRIM37	TRIM37	3.84524
2	38	dTRIM37	TRIM37	2.27033
2	38	dTRIM37	TRIM37	2.72467
2	38	dTRIM37	TRIM37	0.825727
2	38	dTRIM37	TRIM37	5.51937
2	38	dTRIM37	TRIM37	6.59171
2	38	dTRIM37	TRIM37	2.07352
2	38	dTRIM37	TRIM37	2.71827
2	38	dTRIM37	TRIM37	2.99384
2	38	dTRIM37	TRIM37	3.67823
2	38	dTRIM37	TRIM37	8.31128
2	38	dTRIM37	TRIM37	1.55196
2	38	dTRIM37	TRIM37	0.904768
2	38	dTRIM37	TRIM37	1.09154
2	39	dTRIM37	TRIM37	2.63529
2	39	dTRIM37	TRIM37	2.17252
2	39	dTRIM37	TRIM37	2.5131
2	39	dTRIM37	TRIM37	4.31495
2	39	dTRIM37	TRIM37	3.55181
2	39	dTRIM37	TRIM37	14.3397
2	39	dTRIM37	TRIM37	9.54304
2	39	dTRIM37	TRIM37	1.43967
2	39	dTRIM37	TRIM37	4.47376
2	39	dTRIM37	TRIM37	4.34975
2	39	dTRIM37	TRIM37	2.97354
2	40	dTRIM37	TRIM37	3.82414
2	40	dTRIM37	TRIM37	1.54554
2	40	dTRIM37	TRIM37	3.45603
2	40	dTRIM37	TRIM37	5.35959
2	40	dTRIM37	TRIM37	3.86262
2	40	dTRIM37	TRIM37	1.77697
2	40	dTRIM37	TRIM37	2.82574
2	40	dTRIM37	TRIM37	4.88788
2	40	dTRIM37	TRIM37	1.5828
2	40	dTRIM37	TRIM37	2.28585
2	40	dTRIM37	TRIM37	3.28875
2	40	dTRIM37	TRIM37	2.56179
2	40	dTRIM37	TRIM37	2.15956
2	41	WT	CON	7.74662
2	41	WT	CON	6.01994
2	41	WT	CON	3.8051
2	41	WT	CON	8.83545
2	41	WT	CON	6.31231
2	41	WT	CON	10.0712
2	41	WT	CON	6.09335
2	41	WT	CON	3.5032
2	41	WT	CON	3.80191
2	41	WT	CON	6.61834
2	41	WT	CON	0.5962
2	41	WT	CON	3.11652
2	41	WT	CON	0.912108
2	41	WT	CON	2.68421
2	41	WT	CON	4.96741
2	41	WT	CON	5.5032
2	41	WT	CON	6.02551
2	41	WT	CON	5.54968
2	42	WT	CON	1.33964
2	42	WT	CON	13.8636
2	42	WT	CON	5.12441
2	42	WT	CON	6.45269
2	42	WT	CON	7.22097
2	42	WT	CON	12.6739
2	42	WT	CON	3.98282
2	42	WT	CON	3.07817
2	42	WT	CON	5.56152
2	42	WT	CON	3.13118
2	42	WT	CON	6.35508
2	42	WT	CON	6.17441
2	42	WT	CON	8.92255
2	42	WT	CON	3.26642
2	43	WT	CON	11.7242
2	43	WT	CON	6.03778
2	43	WT	CON	1.26758
2	43	WT	CON	6.73326
2	43	WT	CON	9.12006
2	43	WT	CON	5.84027
2	43	WT	CON	6.26116
2	43	WT	CON	8.64851
2	43	WT	CON	6.23511
2	43	WT	CON	5.46862
2	43	WT	CON	3.9398
2	43	WT	CON	3.76649
2	43	WT	CON	2.67861
2	43	WT	CON	6.49258
2	43	WT	CON	8.81402
2	43	WT	CON	5.58102
2	44	WT	CON	6.24012
2	44	WT	CON	6.5467
2	44	WT	CON	6.35592
2	44	WT	CON	11.3586
2	44	WT	CON	4.49284
2	44	WT	CON	13.0647
2	44	WT	CON	8.62387
2	44	WT	CON	0.560693
2	44	WT	CON	4.03818
2	44	WT	CON	2.28998
2	44	WT	CON	4.88562
2	45	WT	CON	14.6644
2	45	WT	CON	11.4066
2	45	WT	CON	11.9074
2	45	WT	CON	17.2478
2	45	WT	CON	8.02713
2	45	WT	CON	23.0753
[truncated: 1,600 more rows]
