# Supplementary material for: Global cellular response to chemical perturbation of PLK4 activity and abnormal centrosome number
Source: eLife. 2022 Jun 27;11:e73944. doi: 10.7554/eLife.73944 (PMC9236612; doi:10.7554/eLife.73944)
Supplement: Figure 3—source data 1. [file elife-73944-fig3-data1.xlsx]

## Sheet: Figure3A
Replicate 1																						Replicate 3
	empty			TRIM37 sgRNA1			TRIM37 sgRNA2
CEP135	DMSO	200 nM	500 nM	DMSO	200 nM	500 nM	DMSO	200 nM	500 nM														LgP			T37 sg1			T37 sg2
0	0	4	56	1	7	94	1	11	134													CEP135	DMSO	200 nM	500 nM	DMSO	200 nM	500 nM	DMSO	200 nM	500 nM
1	13	10	16	4	12	16	8	17	23													0	0	0	32	0	1	49	0	0	31
2	96	31	0	76	25	7	65	19	6													1	1	2	18	6	6	29	3	12	16
3	0	28	0	9	14	3	10	16	1													2	63	14	0	53	26	1	53	10	3
+4	0	41	0	11	30	0	14	29	6													3	0	19	0	0	28	0	3	17	0
																						+4	0	41	0	0	27	0	3	30	2
Replicate 2
	empty			TRIM37 sgRNA1			TRIM37 sgRNA2
CEP135	DMSO	200 nM	500 nM	DMSO	200 nM	500 nM	DMSO	200 nM	500 nM
0	6	3	39	0	9	35	0	2	33
1	9	6	21	3	4	24	2	4	25
2	57	16	0	65	13	0	44	10	3
3	0	21	0	1	16	0	4	13	1
+4	0	28	0	1	32	0	2	25	1

## Sheet: Figure3D
Replicate	Phase	TRIM37 positive	Total cells	Percent with TRIM37
1	G1	41	52	78.8462
1	G2	15	26	57.6923
1	S early	10	11	90.9091
1	S late	11	16	68.75
2	G1	35	51	68.6274
2	G2	5	11	45.4545
2	S early	5	8	62.5
2	S late	19	26	73.0769
3	G1	45	59	76.2712
3	G2	5	11	45.4545
3	S early	1	2	50
3	S late	22	24	91.6667

## Sheet: Figure3G
Replicate	Phase	TRIM37 positive	Total cells	Daughter	Mother	Daughter and Mother	Percent with TRIM37	Percent Daughter	Percent Mother	Percent Mother and Daughter
1	G1	46	69	10	7	29	66.6667	14.4928	10.1449	42.029
1	S/G2	18	27	0	0	18	66.6667	0	0	66.6667
2	G1	57	68	16	11	30	83.8235	23.5294	16.1765	44.1177
2	S/G2	22	26	0	0	22	84.6154	0	0	84.6154
3	G1	54	68	5	9	40	79.4118	7.35294	13.2353	58.8235
3	S/G2	25	28	0	1	23	89.2857	0	3.57143	82.1429

## Sheet: Figure3J
Replicate	Image	Object	Line	Total Intensity, TRIM37 channel
1	1	1	FBC18R	1.0815
1	1	2	FBC18R	4.71501
1	1	3	FBC18R	4.60238
1	1	4	FBC18R	1.57398
1	1	5	FBC18R	9.21083
1	1	6	FBC18R	6.35473
1	1	7	FBC18R	2.49195
1	1	8	FBC18R	3.46888
1	1	9	FBC18R	11.2847
1	1	10	FBC18R	6.96431
1	1	11	FBC18R	5.86087
1	1	12	FBC18R	1.33178
1	1	13	FBC18R	1.67956
1	1	14	FBC18R	0.691722
1	1	15	FBC18R	7.48267
1	1	16	FBC18R	0.827543
1	2	1	FBC18R	14.2291
1	2	2	FBC18R	5.63981
1	2	3	FBC18R	2.40565
1	2	4	FBC18R	3.15979
1	2	5	FBC18R	0.964782
1	2	6	FBC18R	7.85126
1	2	7	FBC18R	5.0517
1	2	8	FBC18R	5.22451
1	2	9	FBC18R	2.69007
1	3	1	FBC18R	2.81021
1	3	2	FBC18R	4.9328
1	3	3	FBC18R	5.11287
1	3	4	FBC18R	4.27655
1	3	5	FBC18R	4.12648
1	3	6	FBC18R	4.54003
1	3	7	FBC18R	22.9525
1	3	8	FBC18R	3.42213
1	3	9	FBC18R	4.39956
1	3	10	FBC18R	6.58831
1	3	11	FBC18R	3.11299
1	3	12	FBC18R	4.85595
1	3	13	FBC18R	6.71194
1	3	14	FBC18R	6.11795
1	3	15	FBC18R	1.76959
1	4	1	FBC18R	6.83012
1	4	2	FBC18R	4.82766
1	4	3	FBC18R	1.79742
1	4	4	FBC18R	3.79898
1	4	5	FBC18R	6.76837
1	4	6	FBC18R	1.89963
1	4	7	FBC18R	5.93446
1	4	8	FBC18R	5.08615
1	4	9	FBC18R	3.55802
1	5	1	FBC18R	3.42002
1	5	2	FBC18R	5.59857
1	5	3	FBC18R	4.15535
1	5	4	FBC18R	2.7491
1	5	5	FBC18R	4.50532
1	5	6	FBC18R	2.82249
1	5	7	FBC18R	4.62257
1	5	8	FBC18R	3.45855
1	5	9	FBC18R	5.53491
1	5	10	FBC18R	8.29589
1	5	11	FBC18R	3.2426
1	5	12	FBC18R	9.6622
1	5	13	FBC18R	0
1	6	1	FBC18R	4.49444
1	6	2	FBC18R	5.92593
1	6	3	FBC18R	4.7169
1	6	4	FBC18R	4.21949
1	6	5	FBC18R	2.86868
1	6	6	FBC18R	4.15995
1	6	7	FBC18R	1.50942
1	6	8	FBC18R	4.38033
1	7	1	FBC18R	6.22182
1	7	2	FBC18R	4.75798
1	7	3	FBC18R	1.09612
1	7	4	FBC18R	4.55485
1	7	5	FBC18R	1.37131
1	7	6	FBC18R	3.91803
1	7	7	FBC18R	2.54081
1	7	8	FBC18R	1.47727
1	7	9	FBC18R	3.50364
1	7	10	FBC18R	2.57824
1	7	11	FBC18R	2.86117
1	7	12	FBC18R	4.91339
1	7	13	FBC18R	2.94411
1	8	1	FBC18R	3.36757
1	8	2	FBC18R	6.4752
1	8	3	FBC18R	3.41672
1	8	4	FBC18R	6.59585
1	8	5	FBC18R	5.92999
1	8	6	FBC18R	6.0681
1	8	7	FBC18R	2.58033
1	8	8	FBC18R	4.36956
1	8	9	FBC18R	5.74745
1	9	1	FBC18R	7.80616
1	9	2	FBC18R	4.92631
1	9	3	FBC18R	2.36229
1	9	4	FBC18R	2.70936
1	9	5	FBC18R	4.26996
1	9	6	FBC18R	3.32917
1	9	7	FBC18R	3.12535
1	9	8	FBC18R	1.66873
1	9	9	FBC18R	1.54397
1	9	10	FBC18R	8.92338
1	9	11	FBC18R	2.72038
1	9	12	FBC18R	5.82182
1	10	1	FBC18R	1.11443
1	10	2	FBC18R	8.31263
1	10	3	FBC18R	0.880278
1	10	4	FBC18R	2.95401
1	10	5	FBC18R	1.33188
1	10	6	FBC18R	0.993744
1	10	7	FBC18R	2.72424
1	10	8	FBC18R	2.15595
1	10	9	FBC18R	2.3462
2	11	1	FBC18R	6.35721
2	11	2	FBC18R	9.46717
2	11	3	FBC18R	1.62467
2	11	4	FBC18R	3.86491
2	11	5	FBC18R	3.32799
2	11	6	FBC18R	0.751095
2	11	7	FBC18R	1.20954
2	11	8	FBC18R	1.29097
2	11	9	FBC18R	3.10413
2	12	1	FBC18R	4.21598
2	12	2	FBC18R	4.97438
2	12	3	FBC18R	5.01517
2	12	4	FBC18R	3.24045
2	12	5	FBC18R	3.58973
2	12	6	FBC18R	3.56199
2	12	7	FBC18R	5.96397
2	12	8	FBC18R	5.05635
2	12	9	FBC18R	4.02339
2	13	1	FBC18R	3.36147
2	13	2	FBC18R	7.34188
2	13	3	FBC18R	1.5792
2	13	4	FBC18R	3.64024
2	13	5	FBC18R	5.85515
2	13	6	FBC18R	4.02641
2	13	7	FBC18R	6.64923
2	13	8	FBC18R	0.390768
2	13	9	FBC18R	5.75355
2	13	10	FBC18R	5.1228
2	13	11	FBC18R	3.44292
2	13	12	FBC18R	5.10268
2	14	1	FBC18R	3.12938
2	14	2	FBC18R	2.74118
2	14	3	FBC18R	5.74986
2	14	4	FBC18R	1.94539
2	14	5	FBC18R	3.703
2	14	6	FBC18R	5.5238
2	14	7	FBC18R	0.384894
2	14	8	FBC18R	0.876799
2	14	9	FBC18R	3.57179
2	14	10	FBC18R	4.76248
2	15	1	FBC18R	7.1082
2	15	2	FBC18R	4.89265
2	15	3	FBC18R	4.4634
2	15	4	FBC18R	1.03462
2	15	5	FBC18R	3.72105
2	15	6	FBC18R	2.99689
2	15	7	FBC18R	1.07955
2	15	8	FBC18R	0.818677
2	15	9	FBC18R	10.6686
2	15	10	FBC18R	7.36378
2	15	11	FBC18R	5.71421
2	15	12	FBC18R	6.24491
2	15	13	FBC18R	3.49653
2	15	14	FBC18R	2.75909
2	15	15	FBC18R	2.56577
2	15	16	FBC18R	4.06734
2	15	17	FBC18R	3.08057
2	16	1	FBC18R	2.69599
2	16	2	FBC18R	5.88188
2	16	3	FBC18R	1.30257
2	16	4	FBC18R	1.74768
2	16	5	FBC18R	4.27857
2	16	6	FBC18R	4.0486
2	16	7	FBC18R	6.00244
2	16	8	FBC18R	5.46247
2	16	9	FBC18R	8.23041
2	16	10	FBC18R	5.77961
2	16	11	FBC18R	4.17307
2	16	12	FBC18R	1.52357
2	16	13	FBC18R	0.960525
2	17	1	FBC18R	3.07924
2	17	2	FBC18R	0.256336
2	17	3	FBC18R	2.13332
2	17	4	FBC18R	3.78599
2	17	5	FBC18R	4.82008
2	17	6	FBC18R	5.05254
2	17	7	FBC18R	0.590814
2	17	8	FBC18R	2.59283
2	17	9	FBC18R	2.11753
2	17	10	FBC18R	2.90683
2	17	11	FBC18R	1.51371
2	17	12	FBC18R	1.98917
2	17	13	FBC18R	2.21268
2	17	14	FBC18R	2.50068
2	18	1	FBC18R	10.6181
2	18	2	FBC18R	10.394
2	18	3	FBC18R	6.71922
2	18	4	FBC18R	7.27039
2	18	5	FBC18R	8.63706
2	19	1	FBC18R	4.37659
2	19	2	FBC18R	7.04744
2	19	3	FBC18R	3.65618
2	19	4	FBC18R	7.5969
2	19	5	FBC18R	1.78268
2	19	6	FBC18R	2.74658
2	19	7	FBC18R	5.75628
2	19	8	FBC18R	1.51235
2	19	9	FBC18R	3.36625
2	19	10	FBC18R	3.54244
2	19	11	FBC18R	2.59936
2	20	1	FBC18R	3.77498
2	20	2	FBC18R	2.46993
2	20	3	FBC18R	5.73681
2	20	4	FBC18R	4.35346
2	20	5	FBC18R	0.831479
2	20	6	FBC18R	5.16234
2	20	7	FBC18R	0.711666
2	20	8	FBC18R	3.57876
3	21	1	FBC18R	3.4464
3	21	2	FBC18R	6.87007
3	21	3	FBC18R	13.5543
3	21	4	FBC18R	2.30597
3	21	5	FBC18R	3.85812
3	21	6	FBC18R	3.94199
3	21	7	FBC18R	23.8063
3	21	8	FBC18R	11.1293
3	21	9	FBC18R	9.68597
3	21	10	FBC18R	1.84875
3	21	11	FBC18R	1.50913
3	22	1	FBC18R	16.4613
3	22	2	FBC18R	7.08312
3	22	3	FBC18R	2.33187
3	22	4	FBC18R	11.6436
3	22	5	FBC18R	4.05156
3	22	6	FBC18R	1.86246
3	22	7	FBC18R	3.29889
3	22	8	FBC18R	3.36457
3	22	9	FBC18R	2.36455
3	22	10	FBC18R	2.07233
3	22	11	FBC18R	1.56172
3	22	12	FBC18R	2.202
3	22	13	FBC18R	4.66744
3	22	14	FBC18R	2.20229
3	22	15	FBC18R	4.61259
3	22	16	FBC18R	2.74084
3	23	1	FBC18R	2.66688
3	23	2	FBC18R	2.87527
3	23	3	FBC18R	5.65721
3	23	4	FBC18R	1.19472
3	23	5	FBC18R	0.988357
3	23	6	FBC18R	9.8493
3	23	7	FBC18R	5.10333
3	23	8	FBC18R	4.94351
3	23	9	FBC18R	3.29264
3	23	10	FBC18R	0.10631
3	23	11	FBC18R	2.45432
3	23	12	FBC18R	1.6896
3	23	13	FBC18R	2.29311
3	23	14	FBC18R	2.20096
3	23	15	FBC18R	2.57908
3	23	16	FBC18R	0.891722
3	23	17	FBC18R	1.22773
3	23	18	FBC18R	8.87413
3	24	1	FBC18R	4.46299
3	24	2	FBC18R	4.05257
3	24	3	FBC18R	2.09499
3	24	4	FBC18R	4.76497
3	24	5	FBC18R	7.41295
3	24	6	FBC18R	4.34824
3	24	7	FBC18R	3.50442
3	24	8	FBC18R	2.56057
3	25	1	FBC18R	1.78973
3	25	2	FBC18R	2.83305
3	25	3	FBC18R	0.883986
3	25	4	FBC18R	4.85776
3	25	5	FBC18R	1.49642
3	25	6	FBC18R	1.11754
3	25	7	FBC18R	0.998795
3	25	8	FBC18R	1.49271
3	25	9	FBC18R	13.2184
3	25	10	FBC18R	1.73481
3	25	11	FBC18R	2.31725
3	26	1	FBC18R	3.65855
3	26	2	FBC18R	3.42361
3	26	3	FBC18R	1.83331
3	26	4	FBC18R	6.85472
3	26	5	FBC18R	0.232425
3	26	6	FBC18R	13.6758
3	26	7	FBC18R	5.69674
3	26	8	FBC18R	4.61593
3	26	9	FBC18R	10.4771
3	26	10	FBC18R	4.28255
3	27	1	FBC18R	5.00423
3	27	2	FBC18R	3.97841
3	27	3	FBC18R	4.51225
3	27	4	FBC18R	12.2505
3	27	5	FBC18R	3.74647
3	27	6	FBC18R	4.06232
3	27	7	FBC18R	4.91029
3	27	8	FBC18R	2.57932
3	27	9	FBC18R	1.30285
3	27	10	FBC18R	1.68637
3	27	11	FBC18R	2.15077
3	28	1	FBC18R	4.84091
3	28	2	FBC18R	4.90869
3	28	3	FBC18R	4.60711
3	28	4	FBC18R	3.85017
3	28	5	FBC18R	5.93951
3	28	6	FBC18R	4.51374
3	28	7	FBC18R	4.11182
3	28	8	FBC18R	6.21378
3	28	9	FBC18R	3.64326
3	28	10	FBC18R	4.73976
3	28	11	FBC18R	3.36893
3	28	12	FBC18R	2.981
3	28	13	FBC18R	2.41657
3	29	1	FBC18R	2.97316
3	29	2	FBC18R	2.53658
3	29	3	FBC18R	2.43267
3	29	4	FBC18R	1.62368
3	29	5	FBC18R	4.85147
3	29	6	FBC18R	3.74536
3	29	7	FBC18R	3.91174
3	29	8	FBC18R	10.7597
3	29	9	FBC18R	2.39384
3	29	10	FBC18R	2.56332
3	30	1	FBC18R	4.09206
3	30	2	FBC18R	5.19899
3	30	3	FBC18R	0.651041
3	30	4	FBC18R	5.13732
3	30	5	FBC18R	3.28527
3	30	6	FBC18R	0.69099
3	30	7	FBC18R	1.58001
3	30	8	FBC18R	3.37589
3	30	9	FBC18R	5.32364
3	30	10	FBC18R	2.07329
3	30	11	FBC18R	3.60034
3	30	12	FBC18R	1.91722
3	30	13	FBC18R	2.01352
3	30	14	FBC18R	13.7736
1	31	1	FBT37	0.407431
1	31	2	FBT37	6.54617
1	31	3	FBT37	7.09824
1	31	4	FBT37	5.66088
1	31	5	FBT37	5.43886
1	31	6	FBT37	13.9349
1	31	7	FBT37	7.88458
1	31	8	FBT37	7.47457
1	31	9	FBT37	4.60049
1	32	1	FBT37	5.63893
1	32	2	FBT37	0.718898
1	32	3	FBT37	4.96208
1	32	4	FBT37	7.44138
1	32	5	FBT37	9.71098
1	32	6	FBT37	7.06531
1	32	7	FBT37	11.7808
1	32	8	FBT37	2.42846
1	32	9	FBT37	8.07279
1	32	10	FBT37	7.38587
1	32	11	FBT37	11.8949
1	33	1	FBT37	4.79741
1	33	2	FBT37	2.52802
1	33	3	FBT37	2.05966
1	33	4	FBT37	4.47131
1	33	5	FBT37	2.85461
1	33	6	FBT37	3.12696
1	33	7	FBT37	1.576
1	33	8	FBT37	1.96201
1	33	9	FBT37	0.769741
1	33	10	FBT37	2.17433
1	33	11	FBT37	2.29831
1	33	12	FBT37	6.25844
1	33	13	FBT37	3.93175
1	34	1	FBT37	8.5892
1	34	2	FBT37	10.6247
1	34	3	FBT37	9.03609
1	34	4	FBT37	6.28153
1	34	5	FBT37	14.0106
1	34	6	FBT37	7.66947
1	34	7	FBT37	5.16509
1	34	8	FBT37	3.13771
1	35	1	FBT37	4.10571
1	35	2	FBT37	13.0041
1	35	3	FBT37	7.46509
1	35	4	FBT37	5.37786
1	35	5	FBT37	8.86265
1	35	6	FBT37	6.2031
1	35	7	FBT37	8.77711
1	36	1	FBT37	3.19881
1	36	2	FBT37	1.86496
1	36	3	FBT37	2.89235
1	36	4	FBT37	4.51325
1	36	5	FBT37	1.85194
1	36	6	FBT37	2.03157
1	36	7	FBT37	2.47097
1	36	8	FBT37	2.23703
1	36	9	FBT37	1.85492
1	36	10	FBT37	7.20827
1	36	11	FBT37	1.7818
1	36	12	FBT37	1.61877
1	37	1	FBT37	8.09287
1	37	2	FBT37	11.7954
1	37	3	FBT37	13.4196
1	37	4	FBT37	21.489
1	37	5	FBT37	3.32975
1	37	6	FBT37	4.88429
1	37	7	FBT37	5.28377
1	37	8	FBT37	2.84652
1	37	9	FBT37	1.27118
1	37	10	FBT37	6.29776
1	37	11	FBT37	6.13066
1	37	12	FBT37	5.34626
1	37	13	FBT37	26.8451
1	38	1	FBT37	7.88418
1	38	2	FBT37	7.56553
1	38	3	FBT37	3.71597
1	38	4	FBT37	4.08031
1	38	5	FBT37	11.7713
1	38	6	FBT37	15.2912
1	38	7	FBT37	4.9299
1	38	8	FBT37	5.30619
1	39	1	FBT37	5.74267
1	39	2	FBT37	7.10857
1	39	3	FBT37	7.1834
1	39	4	FBT37	10.4264
1	39	5	FBT37	0.808331
1	39	6	FBT37	8.40014
1	39	7	FBT37	6.82048
1	39	8	FBT37	4.45052
1	40	1	FBT37	7.04395
1	40	2	FBT37	10.1672
1	40	3	FBT37	5.82544
1	40	4	FBT37	5.23096
1	40	5	FBT37	10.9524
1	40	6	FBT37	4.742
1	40	7	FBT37	5.83134
1	40	8	FBT37	9.95114
1	40	9	FBT37	6.60676
2	41	1	FBT37	6.43612
2	41	2	FBT37	1.97249
2	41	3	FBT37	2.68125
2	41	4	FBT37	2.52238
2	41	5	FBT37	5.4987
2	41	6	FBT37	5.29364
2	41	7	FBT37	3.02469
2	41	8	FBT37	4.15821
2	41	9	FBT37	4.15709
2	41	10	FBT37	2.93533
2	42	1	FBT37	7.20227
2	42	2	FBT37	4.12517
2	42	3	FBT37	10.1395
2	42	4	FBT37	11.3609
2	42	5	FBT37	4.32645
2	42	6	FBT37	5.66278
2	42	7	FBT37	4.86166
2	42	8	FBT37	1.48534
2	43	1	FBT37	5.36959
2	43	2	FBT37	5.84089
2	43	3	FBT37	7.96574
2	43	4	FBT37	11.3069
2	43	5	FBT37	24.3061
2	43	6	FBT37	4.34224
2	43	7	FBT37	20.2855
2	43	8	FBT37	5.68815
2	43	9	FBT37	17.7038
2	44	1	FBT37	7.46151
2	44	2	FBT37	5.30752
2	44	3	FBT37	4.63656
2	44	4	FBT37	6.76342
2	44	5	FBT37	12.6538
2	44	6	FBT37	6.57656
2	44	7	FBT37	5.82597
2	44	8	FBT37	10.1104
2	44	9	FBT37	6.79023
2	44	10	FBT37	7.50721
2	44	11	FBT37	3.98444
2	45	1	FBT37	8.20575
2	45	2	FBT37	0.671931
2	45	3	FBT37	8.28229
2	45	4	FBT37	6.40282
2	45	5	FBT37	5.58973
2	45	6	FBT37	9.91623
2	45	7	FBT37	5.70636
2	45	8	FBT37	7.08707
2	45	9	FBT37	10.2665
2	46	1	FBT37	4.71469
2	46	2	FBT37	3.90674
2	46	3	FBT37	7.08191
2	46	4	FBT37	3.24404
2	46	5	FBT37	7.45388
2	46	6	FBT37	7.31977
2	46	7	FBT37	3.71348
2	46	8	FBT37	5.12262
2	46	9	FBT37	3.97115
2	46	10	FBT37	4.69744
2	46	11	FBT37	6.13126
2	47	1	FBT37	4.87233
2	47	2	FBT37	5.68792
2	47	3	FBT37	9.4878
2	47	4	FBT37	4.82945
2	47	5	FBT37	9.77388
2	47	6	FBT37	5.05997
2	47	7	FBT37	7.6092
2	47	8	FBT37	4.98573
2	47	9	FBT37	3.91266
2	48	1	FBT37	9.47451
2	48	2	FBT37	6.00583
2	48	3	FBT37	4.66377
2	48	4	FBT37	4.72789
2	48	5	FBT37	8.15041
2	48	6	FBT37	0.261006
2	48	7	FBT37	5.94128
2	48	8	FBT37	5.19442
2	48	9	FBT37	0.934554
2	48	10	FBT37	10.9326
2	48	11	FBT37	5.38308
2	49	1	FBT37	2.92122
2	49	2	FBT37	0.0191043
2	49	3	FBT37	4.59513
2	49	4	FBT37	10.048
2	49	5	FBT37	7.54809
2	49	6	FBT37	9.94884
2	49	7	FBT37	10.0422
2	49	8	FBT37	9.12961
2	49	9	FBT37	8.08846
2	49	10	FBT37	5.14957
2	50	1	FBT37	0
2	50	2	FBT37	5.60261
2	50	3	FBT37	7.4061
2	50	4	FBT37	5.61724
2	50	5	FBT37	6.09339
2	50	6	FBT37	12.2422
2	50	7	FBT37	6.5001
2	50	8	FBT37	10.4647
2	50	9	FBT37	7.48035
2	50	10	FBT37	10.1141
2	50	11	FBT37	9.64089
3	51	1	FBT37	4.85154
3	51	2	FBT37	7.17002
3	51	3	FBT37	1.0112
3	51	4	FBT37	7.29802
3	51	5	FBT37	6.86329
3	51	6	FBT37	5.42333
3	51	7	FBT37	3.55457
3	51	8	FBT37	5.29139
3	51	9	FBT37	9.32708
3	51	10	FBT37	5.2957
3	51	11	FBT37	3.50573
3	52	1	FBT37	0.0433661
3	52	2	FBT37	7.07562
3	52	3	FBT37	8.0332
3	52	4	FBT37	2.83178
3	52	5	FBT37	4.45318
3	52	6	FBT37	9.88231
3	52	7	FBT37	5.22803
3	52	8	FBT37	6.62965
3	52	9	FBT37	6.65357
3	52	10	FBT37	6.07872
3	52	11	FBT37	6.42966
3	52	12	FBT37	4.72799
3	53	1	FBT37	4.85089
3	53	2	FBT37	3.62994
3	53	3	FBT37	22.7496
3	53	4	FBT37	8.28594
3	53	5	FBT37	0.784939
3	53	6	FBT37	3.30001
3	53	7	FBT37	7.39527
3	53	8	FBT37	3.16324
3	53	9	FBT37	5.22649
3	53	10	FBT37	3.71672
3	53	11	FBT37	3.10471
3	53	12	FBT37	3.98479
3	54	1	FBT37	3.10431
3	54	2	FBT37	18.8295
3	54	3	FBT37	6.79399
3	54	4	FBT37	20.6937
3	54	5	FBT37	5.55615
3	54	6	FBT37	9.56757
3	54	7	FBT37	7.11252
3	54	8	FBT37	6.62144
3	54	9	FBT37	5.76599
3	54	10	FBT37	8.23948
3	54	11	FBT37	1.86685
3	55	1	FBT37	7.0836
3	55	2	FBT37	9.26702
3	55	3	FBT37	3.84599
3	55	4	FBT37	10.575
3	55	5	FBT37	4.02763
3	55	6	FBT37	7.78497
3	55	7	FBT37	4.20911
3	55	8	FBT37	7.44349
3	55	9	FBT37	2.65916
3	55	10	FBT37	3.18207
3	55	11	FBT37	4.69427
3	55	12	FBT37	5.76857
3	56	1	FBT37	1.07456
3	56	2	FBT37	4.62461
3	56	3	FBT37	5.72854
3	56	4	FBT37	0.527413
3	56	5	FBT37	6.23409
3	56	6	FBT37	7.22379
3	56	7	FBT37	2.2732
3	56	8	FBT37	2.52724
3	56	9	FBT37	0.805264
3	56	10	FBT37	5.73593
3	56	11	FBT37	5.95634
3	57	1	FBT37	4.05644
3	57	2	FBT37	2.79176
3	57	3	FBT37	3.0847
3	57	4	FBT37	1.13433
3	57	5	FBT37	3.21166
3	57	6	FBT37	0.857801
3	57	7	FBT37	0.194598
3	57	8	FBT37	3.09378
3	57	9	FBT37	1.92851
3	57	10	FBT37	2.24048
3	58	1	FBT37	7.68167
3	58	2	FBT37	4.47117
3	58	3	FBT37	3.77702
3	58	4	FBT37	4.08997
3	58	5	FBT37	3.57082
3	58	6	FBT37	11.5512
3	58	7	FBT37	2.55346
3	58	8	FBT37	13.9889
3	58	9	FBT37	3.03377
3	58	10	FBT37	4.31078
3	59	1	FBT37	6.06505
3	59	2	FBT37	8.46064
3	59	3	FBT37	9.90541
3	59	4	FBT37	6.78431
3	59	5	FBT37	9.59261
3	59	6	FBT37	8.30622
3	59	7	FBT37	5.13971
3	59	8	FBT37	4.83101
3	59	9	FBT37	4.25232
3	60	1	FBT37	2.60694
3	60	2	FBT37	4.52293
3	60	3	FBT37	3.2647
3	60	4	FBT37	3.26262
3	60	5	FBT37	3.19629
3	60	6	FBT37	11.924
3	60	7	FBT37	2.39023
3	60	8	FBT37	12.862
3	60	9	FBT37	5.63755
3	60	10	FBT37	4.85389
3	60	11	FBT37	2.55492
3	60	12	FBT37	2.49363
1	61	1	FB	0.536019
1	61	2	FB	0.300465
1	61	3	FB	0.201602
1	61	4	FB	0.321965
1	61	5	FB	0.175769
1	61	6	FB	0.517372
1	61	7	FB	0.411719
1	61	8	FB	0.198138
1	61	9	FB	0.463783
1	61	10	FB	0.387472
1	61	11	FB	0.31902
1	61	12	FB	0.718166
1	61	13	FB	0.170947
1	61	14	FB	0.627512
1	61	15	FB	0.30103
1	62	1	FB	0.435889
1	62	2	FB	0.369482
1	62	3	FB	0.0235599
1	62	4	FB	0.340642
1	62	5	FB	0.605875
1	62	6	FB	0.124025
1	62	7	FB	0.383307
1	62	8	FB	0.621057
1	62	9	FB	0.211933
1	62	10	FB	0.527733
1	62	11	FB	0.164202
1	63	1	FB	0.182376
1	63	2	FB	0.316335
1	63	3	FB	0.437858
1	63	4	FB	0.256489
1	63	5	FB	0.238682
1	63	6	FB	0.589029
1	63	7	FB	0.179217
1	63	8	FB	0.606012
1	63	9	FB	0.388434
1	63	10	FB	0.276692
1	63	11	FB	0.279789
1	63	12	FB	0.334051
1	63	13	FB	0.365103
1	63	14	FB	0.368032
1	63	15	FB	0.61651
1	64	1	FB	0.39237
1	64	2	FB	0.414847
1	64	3	FB	0.0970016
1	64	4	FB	0.256611
1	64	5	FB	0.32668
1	64	6	FB	0.421607
1	64	7	FB	0.343587
1	64	8	FB	0.135241
1	64	9	FB	0.0644694
1	64	10	FB	0.376349
1	64	11	FB	0.277821
1	64	12	FB	0.535271
1	64	13	FB	0.0630961
1	64	14	FB	0.686809
1	65	1	FB	0.312383
1	65	2	FB	0.644678
1	65	3	FB	0.342535
1	65	4	FB	0.536965
1	65	5	FB	0.290211
1	65	6	FB	0.11043
1	65	7	FB	0.0744183
1	65	8	FB	0.0914931
1	65	9	FB	0.90309
1	65	10	FB	0.432731
1	65	11	FB	0.378485
1	65	12	FB	0.335393
1	65	13	FB	0.368246
1	66	1	FB	0.23035
1	66	2	FB	0.37232
1	66	3	FB	0.547738
1	66	4	FB	0.592599
1	66	5	FB	0.136065
1	66	6	FB	0.0255589
1	66	7	FB	0.752041
1	66	8	FB	0.425925
1	66	9	FB	0.238178
1	66	10	FB	0.347631
1	66	11	FB	0.314229
1	66	12	FB	0.58822
1	67	1	FB	0.589593
1	67	2	FB	0.664714
1	67	3	FB	0.495445
1	67	4	FB	0.886122
1	67	5	FB	0.174197
1	67	6	FB	0.664897
1	67	7	FB	0.556405
1	67	8	FB	0.544915
1	67	9	FB	0.165759
1	67	10	FB	0.207401
1	67	11	FB	0.404562
1	67	12	FB	0.0525063
1	68	1	FB	0.0556954
1	68	2	FB	0.31368
1	68	3	FB	0.521386
1	68	4	FB	0.822522
1	68	5	FB	0.492866
1	68	6	FB	0.395438
1	68	7	FB	0.44445
1	68	8	FB	0.34435
1	68	9	FB	0.174044
1	68	10	FB	0.832364
1	68	11	FB	0.90222
1	68	12	FB	0.310903
1	69	1	FB	0.277714
1	69	2	FB	0.611597
1	69	3	FB	0.55816
1	69	4	FB	0.356481
1	69	5	FB	0.81854
1	69	6	FB	0.498543
1	69	7	FB	0.36025
1	69	8	FB	0.975402
1	69	9	FB	0.487907
1	69	10	FB	0.0653086
1	69	11	FB	0.293462
1	70	1	FB	0.505653
1	70	2	FB	0.893568
1	70	3	FB	0.503212
1	70	4	FB	0.352773
1	70	5	FB	0.407385
1	70	6	FB	0.0971084
1	70	7	FB	0.166796
1	70	8	FB	0.453529
1	70	9	FB	0.477241
1	70	10	FB	0.170962
1	70	11	FB	0.416022
1	70	12	FB	0.341131
1	70	13	FB	0.21326
1	70	14	FB	0.144106
1	70	15	FB	0.125505
1	70	16	FB	0.35024
1	70	17	FB	0.191943
2	71	1	FB	0.49485
2	71	2	FB	0.325078
2	71	3	FB	0.867369
2	71	4	FB	0.184176
2	71	5	FB	0.45182
2	71	6	FB	0.137758
2	71	7	FB	0.27097
2	71	8	FB	0.695369
2	71	9	FB	0.114702
2	71	10	FB	0.241016
2	71	11	FB	0.196521
2	71	12	FB	0.438392
2	71	13	FB	0.262638
2	71	14	FB	0.186587
2	71	15	FB	0.220157
2	71	16	FB	0.0868544
2	71	17	FB	0.121798
2	72	1	FB	0.128527
2	72	2	FB	0.1935
2	72	3	FB	0.232486
2	72	4	FB	0.0334783
2	72	5	FB	0.302449
2	72	6	FB	0.256947
2	72	7	FB	0.388586
2	72	8	FB	0.141604
2	72	9	FB	0.176516
2	72	10	FB	0.27158
2	72	11	FB	0.146777
2	72	12	FB	0.167834
2	72	13	FB	0.157382
2	72	14	FB	0.172473
2	72	15	FB	3.21334
2	72	16	FB	0.262943
2	72	17	FB	0.0203708
2	72	18	FB	0.092134
2	72	19	FB	0.20058
2	73	1	FB	0.129931
2	73	2	FB	0.214771
2	73	3	FB	0.142672
2	73	4	FB	0.166323
2	73	5	FB	0.173678
2	73	6	FB	0.192416
2	73	7	FB	0.135409
2	73	8	FB	0.248035
2	73	9	FB	0.132097
2	74	1	FB	0.0840162
2	74	2	FB	0.337255
2	74	3	FB	0.447196
2	74	4	FB	0.50808
2	74	5	FB	0.355459
2	74	6	FB	0.197406
2	74	7	FB	0.184573
2	74	8	FB	0.266148
2	74	9	FB	0.498177
2	74	10	FB	0.0620737
2	74	11	FB	0.0878004
2	74	12	FB	0.153079
2	74	13	FB	0.248981
2	74	14	FB	0.353613
2	75	1	FB	0.320195
2	75	2	FB	0.168658
2	75	3	FB	0.252064
2	75	4	FB	0.295506
2	75	5	FB	0.2486
2	75	6	FB	0.0755779
2	75	7	FB	0.108934
2	75	8	FB	0.747021
2	75	9	FB	0.639902
2	75	10	FB	0.465446
2	75	11	FB	0.284474
2	75	12	FB	1.04443
2	75	13	FB	0.470375
2	75	14	FB	0.190997
2	76	1	FB	0.419409
2	76	2	FB	0.3075
2	76	3	FB	0.908858
2	76	4	FB	0.336934
2	76	5	FB	0.179538
2	76	6	FB	0.567269
2	76	7	FB	0.595773
2	76	8	FB	0.26598
2	76	9	FB	0.0363012
2	76	10	FB	0.21062
2	76	11	FB	0.14818
2	76	12	FB	0.77406
2	77	1	FB	0.366415
2	77	2	FB	0.172015
2	77	3	FB	0.154971
2	77	4	FB	0.475181
2	77	5	FB	0.0724193
2	77	6	FB	0.111681
2	77	7	FB	0.132265
2	77	8	FB	0.322057
2	77	9	FB	0.271992
2	77	10	FB	0.257404
2	77	11	FB	0.185351
2	77	12	FB	1.47869
2	77	13	FB	0.274983
2	77	14	FB	0.423102
2	77	15	FB	0.638972
2	78	1	FB	0.416144
2	78	2	FB	0.137469
2	78	3	FB	0.330098
2	78	4	FB	0.138827
2	78	5	FB	0.52874
2	78	6	FB	0.340398
2	78	7	FB	0.415869
2	78	8	FB	0.0804303
2	78	9	FB	0.248737
2	78	10	FB	0.314458
2	78	11	FB	0.370062
2	78	12	FB	0.0352636
2	79	1	FB	0.348379
2	79	2	FB	0.145403
2	79	3	FB	0.374426
2	79	4	FB	0.3561
2	79	5	FB	0.354284
2	79	6	FB	0.52256
2	79	7	FB	0.296239
2	79	8	FB	0.358938
2	79	9	FB	0.19234
2	79	10	FB	0.45034
2	79	11	FB	0.53257
2	79	12	FB	0.0551919
2	79	13	FB	0.527459
2	79	14	FB	0.272847
2	79	15	FB	0.51368
2	79	16	FB	0.119493
2	79	17	FB	0.780423
2	79	18	FB	0.451026
2	79	19	FB	0.799603
2	79	20	FB	0.263447
2	79	21	FB	0.184344
2	79	22	FB	0.372076
2	80	1	FB	0.266087
2	80	2	FB	0.335973
2	80	3	FB	1.14255
2	80	4	FB	0.54548
2	80	5	FB	0.171908
2	80	6	FB	0.719081
2	80	7	FB	0.029633
2	80	8	FB	1.43845
2	80	9	FB	0.128328
3	81	1	FB	0.490379
3	81	2	FB	0.561837
3	81	3	FB	0.345022
3	81	4	FB	0.153872
3	81	5	FB	0.386709
3	81	6	FB	0.125078
3	81	7	FB	0.417563
3	81	8	FB	0.399069
3	81	9	FB	0.555352
3	81	10	FB	0.28603
3	82	1	FB	0.734661
3	82	2	FB	0.932235
3	82	3	FB	0.227573
3	82	4	FB	0.430686
3	82	5	FB	0.222019
3	82	6	FB	0.0661021
3	82	7	FB	0.41088
3	82	8	FB	0.297612
3	82	9	FB	0.586603
3	82	10	FB	0.315282
3	82	11	FB	0.363729
3	82	12	FB	0.58645
3	83	1	FB	0.695964
3	83	2	FB	1.01474
3	83	3	FB	0.633021
3	83	4	FB	0.516396
3	83	5	FB	0.524315
3	83	6	FB	0.100145
3	83	7	FB	0.546349
3	83	8	FB	0.310613
3	83	9	FB	0.153933
3	83	10	FB	0.274266
3	83	11	FB	0.300435
3	83	12	FB	0.430991
3	83	13	FB	0.113741
3	84	1	FB	0.480003
3	84	2	FB	0.775723
3	84	3	FB	0.909056
3	84	4	FB	0.207614
3	84	5	FB	0.17911
3	84	6	FB	0.600443
3	84	7	FB	0.370962
3	84	8	FB	0.250568
3	84	9	FB	0.161578
3	84	10	FB	0.396902
3	84	11	FB	0.853285
3	85	1	FB	0.370184
3	85	2	FB	0.580606
3	85	3	FB	0.1832
3	85	4	FB	0.294255
3	85	5	FB	0.359701
3	85	6	FB	0.437369
3	85	7	FB	0.577737
3	85	8	FB	0.685634
3	85	9	FB	0.369986
3	85	10	FB	0.0794842
3	85	11	FB	0.403128
3	85	12	FB	0.580423
3	85	13	FB	0.598367
3	85	14	FB	0.313466
3	85	15	FB	0.10338
3	86	1	FB	0.10277
3	86	2	FB	0.033341
3	86	3	FB	0.504891
3	86	4	FB	0.515816
3	86	5	FB	0.189258
3	86	6	FB	0.613306
3	86	7	FB	0.0481117
3	86	8	FB	0.303868
3	86	9	FB	0.421241
3	86	10	FB	0.543618
3	86	11	FB	0.3776
3	86	12	FB	0.667018
3	86	13	FB	0.150958
3	87	1	FB	0.353201
3	87	2	FB	0.0749676
3	87	3	FB	0.647471
3	87	4	FB	0.242924
3	87	5	FB	0.16228
3	87	6	FB	0.432837
3	87	7	FB	0.611231
3	87	8	FB	0.281788
3	87	9	FB	1.12395
3	87	10	FB	0.153475
3	87	11	FB	0.288609
3	87	12	FB	0.212222
3	87	13	FB	0.257542
3	87	14	FB	0.480583
3	87	15	FB	0.246418
3	87	16	FB	0.378195
3	88	1	FB	0.0615091
3	88	2	FB	0.116197
3	88	3	FB	0.2177
3	88	4	FB	0.345602
3	88	5	FB	0.533791
3	88	6	FB	0.956497
3	88	7	FB	0.381872
3	88	8	FB	1.17194
3	88	9	FB	0.398566
3	88	10	FB	0.288197
3	88	11	FB	0.301198
3	89	1	FB	0.505592
3	89	2	FB	0.517144
3	89	3	FB	0.225086
3	89	4	FB	0.527581
3	89	5	FB	0.436118
3	89	6	FB	0.482582
3	89	7	FB	0.305241
3	89	8	FB	0.511681
3	89	9	FB	0.231724
3	89	10	FB	0.280125
3	90	1	FB	0.451041
3	90	2	FB	0.264591
3	90	3	FB	0.218204
3	90	4	FB	0.313512
3	90	5	FB	0.177829
3	90	6	FB	0.298009
3	90	7	FB	0.417227
3	90	8	FB	0.208713
3	90	9	FB	0.432837
3	90	10	FB	0.711177
3	90	11	FB	0.445365
3	90	12	FB	0.389868
3	90	13	FB	0.146395
3	90	14	FB	0.243442
3	90	15	FB	0.351125
3	90	16	FB	0.0942092
1	121	1	FBdRING	1.95621
1	121	2	FBdRING	1.96225
1	121	3	FBdRING	16.2024
1	121	4	FBdRING	10.7785
1	121	5	FBdRING	6.92445
1	121	6	FBdRING	14.7915
1	121	7	FBdRING	1.81123
1	121	8	FBdRING	2.16516
1	121	9	FBdRING	9.91551
1	121	10	FBdRING	9.31862
1	121	11	FBdRING	1.1651
1	121	12	FBdRING	2.96724
1	121	13	FBdRING	3.15407
1	121	14	FBdRING	5.73184
1	121	15	FBdRING	11.3666
1	122	1	FBdRING	5.44894
1	122	2	FBdRING	16.2854
1	122	3	FBdRING	2.92482
1	122	4	FBdRING	2.66404
1	122	5	FBdRING	16.802
1	122	6	FBdRING	12.4703
1	122	7	FBdRING	4.82953
1	122	8	FBdRING	15.6722
1	122	9	FBdRING	5.27591
1	122	10	FBdRING	3.11185
1	122	11	FBdRING	2.25959
1	122	12	FBdRING	4.34685
1	123	1	FBdRING	13.4309
1	123	2	FBdRING	5.61411
1	123	3	FBdRING	7.42657
1	123	4	FBdRING	7.6015
1	123	5	FBdRING	8.31759
1	123	6	FBdRING	5.61233
1	123	7	FBdRING	1.83607
1	123	8	FBdRING	3.79069
1	124	1	FBdRING	2.88084
1	124	2	FBdRING	7.20826
1	124	3	FBdRING	1.14997
1	124	4	FBdRING	4.29194
1	124	5	FBdRING	2.2345
1	124	6	FBdRING	9.83871
1	124	7	FBdRING	3.06482
1	124	8	FBdRING	2.59577
1	124	9	FBdRING	7.51359
1	125	1	FBdRING	3.45212
1	125	2	FBdRING	0.966476
1	125	3	FBdRING	5.31531
1	125	4	FBdRING	5.46761
1	125	5	FBdRING	0.406195
1	125	6	FBdRING	3.86613
1	125	7	FBdRING	0.323949
1	125	8	FBdRING	1.3252
1	125	9	FBdRING	9.60322
1	125	10	FBdRING	0.505425
1	125	11	FBdRING	2.30071
1	126	1	FBdRING	1.56606
1	126	2	FBdRING	12.8645
1	126	3	FBdRING	7.02202
1	126	4	FBdRING	7.23478
1	126	5	FBdRING	11.7545
1	126	6	FBdRING	6.86178
1	127	1	FBdRING	5.87707
1	127	2	FBdRING	1.11463
1	127	3	FBdRING	0.420859
1	127	4	FBdRING	2.94806
1	127	5	FBdRING	3.04503
1	127	6	FBdRING	0.354223
1	127	7	FBdRING	0.446372
1	127	8	FBdRING	3.48502
1	127	9	FBdRING	1.79269
1	127	10	FBdRING	13.8727
1	127	11	FBdRING	1.99915
1	128	1	FBdRING	6.76567
1	128	2	FBdRING	2.71839
1	128	3	FBdRING	3.87869
1	128	4	FBdRING	6.07156
1	128	5	FBdRING	7.93347
1	128	6	FBdRING	3.49995
1	128	7	FBdRING	2.66569
1	128	8	FBdRING	3.30504
1	128	9	FBdRING	2.36828
1	128	10	FBdRING	5.95108
1	128	11	FBdRING	2.16626
1	128	12	FBdRING	1.68284
1	128	13	FBdRING	2.68785
1	128	14	FBdRING	2.56211
1	128	15	FBdRING	1.66258
1	129	1	FBdRING	4.57629
1	129	2	FBdRING	8.34179
1	129	3	FBdRING	4.44294
1	129	4	FBdRING	0.624903
1	129	5	FBdRING	1.5922
1	129	6	FBdRING	3.58929
1	130	1	FBdRING	3.99355
1	130	2	FBdRING	5.13495
1	130	3	FBdRING	1.44947
1	130	4	FBdRING	5.35727
1	130	5	FBdRING	4.21306
1	130	6	FBdRING	2.12735
1	130	7	FBdRING	8.73538
1	130	8	FBdRING	1.78917
2	131	1	FBdRING	14.0448
2	131	2	FBdRING	2.54432
2	131	3	FBdRING	1.5192
2	131	4	FBdRING	6.38593
2	131	5	FBdRING	5.32428
2	131	6	FBdRING	17.8738
2	131	7	FBdRING	0.728511
2	131	8	FBdRING	0.946548
2	131	9	FBdRING	8.96405
2	131	10	FBdRING	6.34607
2	131	11	FBdRING	8.41585
2	131	12	FBdRING	1.04521
2	131	13	FBdRING	0.627543
2	131	14	FBdRING	5.22383
2	132	1	FBdRING	3.55996
2	132	2	FBdRING	1.80027
2	132	3	FBdRING	4.67721
2	132	4	FBdRING	5.02724
2	132	5	FBdRING	4.02405
2	132	6	FBdRING	2.71368
2	132	7	FBdRING	6.69349
2	132	8	FBdRING	4.52383
2	132	9	FBdRING	6.8211
2	132	10	FBdRING	0.616144
2	133	1	FBdRING	29.4891
2	133	2	FBdRING	0.538018
2	133	3	FBdRING	8.29331
2	133	4	FBdRING	17.9806
2	133	5	FBdRING	7.08531
2	133	6	FBdRING	11.0128
2	134	1	FBdRING	1.69555
2	134	2	FBdRING	1.45052
2	134	3	FBdRING	1.37179
2	134	4	FBdRING	0.452445
2	134	5	FBdRING	5.82293
2	134	6	FBdRING	1.23799
2	134	7	FBdRING	6.02884
2	134	8	FBdRING	1.40131
2	134	9	FBdRING	0.604395
2	135	1	FBdRING	14.0772
2	135	2	FBdRING	5.68588
2	135	3	FBdRING	9.85966
2	135	4	FBdRING	5.76649
2	136	1	FBdRING	2.07434
2	136	2	FBdRING	3.22791
2	136	3	FBdRING	1.11334
2	136	4	FBdRING	2.03561
2	137	1	FBdRING	4.60107
2	137	2	FBdRING	9.53063
2	137	3	FBdRING	5.38019
2	137	4	FBdRING	7.16556
2	137	5	FBdRING	2.5003
2	137	6	FBdRING	0.596506
2	137	7	FBdRING	1.91667
2	137	8	FBdRING	1.86645
2	137	9	FBdRING	1.06003
2	138	1	FBdRING	4.27903
2	138	2	FBdRING	0.896712
2	138	3	FBdRING	7.50948
2	138	4	FBdRING	5.6423
2	138	5	FBdRING	2.18784
2	138	6	FBdRING	1.50439
2	138	7	FBdRING	19.7146
2	138	8	FBdRING	2.51933
2	138	9	FBdRING	14.0672
2	138	10	FBdRING	0.717464
2	139	1	FBdRING	7.1572
2	139	2	FBdRING	5.49868
2	139	3	FBdRING	2.27976
2	139	4	FBdRING	5.48927
2	139	5	FBdRING	3.36919
2	139	6	FBdRING	7.2907
2	139	7	FBdRING	3.22882
2	139	8	FBdRING	7.9315
2	140	1	FBdRING	6.47634
2	140	2	FBdRING	2.71377
2	140	3	FBdRING	5.9051
2	140	4	FBdRING	2.39318
2	140	5	FBdRING	3.01662
2	140	6	FBdRING	5.57871
2	140	7	FBdRING	8.33556
2	140	8	FBdRING	2.48006
2	140	9	FBdRING	12.0535
2	140	10	FBdRING	4.78662
3	141	1	FBdRING	4.05359
3	141	2	FBdRING	4.51518
3	141	3	FBdRING	5.01875
3	141	4	FBdRING	2.61382
3	141	5	FBdRING	0.772625
3	141	6	FBdRING	1.59226
3	141	7	FBdRING	4.78213
3	141	8	FBdRING	7.46732
3	142	1	FBdRING	16.6391
3	142	2	FBdRING	4.787
3	142	3	FBdRING	0.571878
3	142	4	FBdRING	3.90375
3	142	5	FBdRING	4.33497
3	142	6	FBdRING	8.53413
3	142	7	FBdRING	1.26725
3	142	8	FBdRING	0.749187
3	142	9	FBdRING	0.00915541
3	142	10	FBdRING	6.36211
3	142	11	FBdRING	8.5727
3	142	12	FBdRING	5.50155
3	143	1	FBdRING	11.5818
3	143	2	FBdRING	3.75311
3	143	3	FBdRING	2.57021
3	143	4	FBdRING	0.660563
3	143	5	FBdRING	13.7633
3	143	6	FBdRING	2.23131
3	143	7	FBdRING	28.41
3	143	8	FBdRING	3.98938
3	144	1	FBdRING	1.20082
3	144	2	FBdRING	2.97124
3	144	3	FBdRING	0.93106
3	144	4	FBdRING	9.93867
3	144	5	FBdRING	0.751522
3	144	6	FBdRING	9.98001
3	144	7	FBdRING	11.5487
3	145	1	FBdRING	0.0530098
3	145	2	FBdRING	3.66886
3	145	3	FBdRING	1.58756
3	145	4	FBdRING	21.5868
3	145	5	FBdRING	3.03044
3	145	6	FBdRING	10.393
3	145	7	FBdRING	2.5657
3	145	8	FBdRING	2.6349
3	145	9	FBdRING	4.01701
3	145	10	FBdRING	12.535
3	145	11	FBdRING	8.03799
3	145	12	FBdRING	11.2785
3	146	1	FBdRING	1.65667
3	146	2	FBdRING	8.12985
3	146	3	FBdRING	0.987564
3	146	4	FBdRING	2.31366
3	147	1	FBdRING	6.07089
3	147	2	FBdRING	2.56416
3	147	3	FBdRING	1.19852
3	147	4	FBdRING	1.35247
3	147	5	FBdRING	2.95488
3	147	6	FBdRING	2.08295
3	147	7	FBdRING	2.67451
3	147	8	FBdRING	4.87999
3	148	1	FBdRING	9.2313
3	148	2	FBdRING	8.5519
3	148	3	FBdRING	2.97391
3	148	4	FBdRING	0.782177
3	148	5	FBdRING	3.80266
3	148	6	FBdRING	4.27466
3	148	7	FBdRING	5.68893
3	149	1	FBdRING	14.2064
3	149	2	FBdRING	11.1827
3	149	3	FBdRING	2.41465
3	149	4	FBdRING	5.63926
3	149	5	FBdRING	3.02353
3	149	6	FBdRING	9.50423
3	149	7	FBdRING	2.84723
3	149	8	FBdRING	3.82181
3	149	9	FBdRING	15.4936
3	149	10	FBdRING	3.82416
3	149	11	FBdRING	5.8979
3	150	1	FBdRING	0.93193
3	150	2	FBdRING	5.42948
3	150	3	FBdRING	3.80191
3	150	4	FBdRING	2.42089
3	150	5	FBdRING	0.646967
3	150	6	FBdRING	2.71113
3	150	7	FBdRING	2.84028
3	150	8	FBdRING	1.32299
3	150	9	FBdRING	2.41013
