# Supplementary material for: Global cellular response to chemical perturbation of PLK4 activity and abnormal centrosome number
Source: eLife. 2022 Jun 27;11:e73944. doi: 10.7554/eLife.73944 (PMC9236612; doi:10.7554/eLife.73944)
Supplement: Figure 4—source data 1. [file elife-73944-fig4-data1.xlsx]

## Sheet: Figure4A
Replicate	Experiment	Line	TRIM37 rescue construct	Condition	Intensity
1	1	WT	none	DMSO	18305767
1	1	WT	none	DMSO	18804636
1	1	WT	none	200nM	2048644
1	1	WT	none	200nM	3033813
1	1	WT	none	500nM	2691018
1	1	WT	none	500nM	2342338
1	1	dTRIM37	none	DMSO	21903985
1	1	dTRIM37	none	DMSO	20624491
1	1	dTRIM37	none	200nM	13151594
1	1	dTRIM37	none	200nM	15116872
1	1	dTRIM37	none	500nM	17990996
1	1	dTRIM37	none	500nM	14417102
1	1	dTRIM37	FBTRIM37	DMSO	28333765
1	1	dTRIM37	FBTRIM37	DMSO	27039590
1	1	dTRIM37	FBTRIM37	200nM	4054314
1	1	dTRIM37	FBTRIM37	200nM	4278979
1	1	dTRIM37	FBTRIM37	500nM	3073779
1	1	dTRIM37	FBTRIM37	500nM	3102750
1	1	dTRIM37	FBC18R	DMSO	21296577
1	1	dTRIM37	FBC18R	DMSO	20028184
1	1	dTRIM37	FBC18R	200nM	2678604
1	1	dTRIM37	FBC18R	200nM	2037611
1	1	dTRIM37	FBC18R	500nM	3027470
1	1	dTRIM37	FBC18R	500nM	3308249
2	2	WT	none	DMSO	17626533
2	2	WT	none	DMSO	22131284
2	2	WT	none	200nM	1617600
2	2	WT	none	200nM	1481219
2	2	WT	none	500nM	958178
2	2	WT	none	500nM	1106616
2	2	dTRIM37	none	DMSO	15680859
2	2	dTRIM37	none	DMSO	13656226
2	2	dTRIM37	none	200nM	11688668
2	2	dTRIM37	none	200nM	13245098
2	2	dTRIM37	none	500nM	12209727
2	2	dTRIM37	none	500nM	12827788
2	2	dTRIM37	FBTRIM37	DMSO	15886441
2	2	dTRIM37	FBTRIM37	DMSO	15125542
2	2	dTRIM37	FBTRIM37	200nM	2569451
2	2	dTRIM37	FBTRIM37	200nM	2278808
2	2	dTRIM37	FBTRIM37	500nM	1529099
2	2	dTRIM37	FBTRIM37	500nM	1135170
2	2	dTRIM37	FBC18R	DMSO	23808493
2	2	dTRIM37	FBC18R	DMSO	24263870
2	2	dTRIM37	FBC18R	200nM	2117324
2	2	dTRIM37	FBC18R	200nM	1061251
2	2	dTRIM37	FBC18R	500nM	1162935
2	2	dTRIM37	FBC18R	500nM	877381
3	3	WT	none	DMSO	3177054578
3	3	WT	none	DMSO	3195348448
3	3	WT	none	200nM	1236943763
3	3	WT	none	200nM	1120750447
3	3	WT	none	500nM	607984447
3	3	WT	none	500nM	633676152
3	3	dTRIM37	none	DMSO	1917365341
3	3	dTRIM37	none	DMSO	1843164772
3	3	dTRIM37	none	200nM	1345746412
3	3	dTRIM37	none	200nM	1287445454
3	3	dTRIM37	none	500nM	1391861016
3	3	dTRIM37	none	500nM	1582921565
1	3	dTRIM37	FB	DMSO	2072884743
1	3	dTRIM37	FB	DMSO	2149508246
1	3	dTRIM37	FB	200nM	1652957268
1	3	dTRIM37	FB	200nM	1513516686
1	3	dTRIM37	FB	500nM	1550534533
1	3	dTRIM37	FB	500nM	1549996900
3	3	dTRIM37	FBTRIM37	DMSO	3619885233
3	3	dTRIM37	FBTRIM37	DMSO	3611878081
3	3	dTRIM37	FBTRIM37	200nM	1302327144
3	3	dTRIM37	FBTRIM37	200nM	1394620867
3	3	dTRIM37	FBTRIM37	500nM	1200477886
3	3	dTRIM37	FBTRIM37	500nM	1165696593
3	3	dTRIM37	FBC18R	DMSO	2688897848
3	3	dTRIM37	FBC18R	DMSO	2742940751
3	3	dTRIM37	FBC18R	200nM	620815963
3	3	dTRIM37	FBC18R	200nM	776794145
3	3	dTRIM37	FBC18R	500nM	688220846
3	3	dTRIM37	FBC18R	500nM	664550642
4	4	WT	none	DMSO	2610224170
4	4	WT	none	DMSO	2362439720
4	4	WT	none	200nM	701066698
4	4	WT	none	200nM	737812144
4	4	WT	none	500nM	749009255
4	4	WT	none	500nM	780665105
1	4	dTRIM37	dRING	DMSO	3020266361
1	4	dTRIM37	dRING	DMSO	3518279702
1	4	dTRIM37	dRING	200nM	769016383
1	4	dTRIM37	dRING	200nM	776657945
1	4	dTRIM37	dRING	500nM	878292150
1	4	dTRIM37	dRING	500nM	837604060
5	5	WT	none	DMSO	1388221532
5	5	WT	none	200nM	217864816
5	5	WT	none	500nM	169585021
4	5	dTRIM37	none	DMSO	2306899654
4	5	dTRIM37	none	200nM	2039464715
4	5	dTRIM37	none	500nM	1874008745
2	5	dTRIM37	FB	DMSO	1936181079
2	5	dTRIM37	FB	200nM	1142499955
2	5	dTRIM37	FB	500nM	906484517
3	5	dTRIM37	FB	DMSO	1713936314
3	5	dTRIM37	FB	200nM	1149388876
3	5	dTRIM37	FB	500nM	1267238889
2	5	dTRIM37	dRING	DMSO	1280321387
2	5	dTRIM37	dRING	200nM	199893406
2	5	dTRIM37	dRING	500nM	183484727
3	5	dTRIM37	dRING	DMSO	1479239878
3	5	dTRIM37	dRING	200nM	165090376
3	5	dTRIM37	dRING	500nM	187843171

## Sheet: Figure4B
Replicate	Technical replicate	Line	TRIM37 rescue construct	Condition	Intensity	DMSO average	Percent DMSO
1	1	dTRIM37	C18R	DMSO	5230.3	5190.45	1.00768
1	2	dTRIM37	C18R	DMSO	5150.6	5190.45	0.992322
1	1	dTRIM37	C18R	50 nM	3206.41	5190.45	0.617753
1	2	dTRIM37	C18R	50 nM	3076.94	5190.45	0.592809
1	1	dTRIM37	C18R	125 nM	735.92	5190.45	0.141783
1	2	dTRIM37	C18R	125 nM	685.351	5190.45	0.132041
1	1	dTRIM37	C18R	150 nM	728.719	5190.45	0.140396
1	2	dTRIM37	C18R	150 nM	925.139	5190.45	0.178239
1	1	dTRIM37	C18R	167 nM	775.201	5190.45	0.149351
1	2	dTRIM37	C18R	167 nM	736.244	5190.45	0.141846
1	1	dTRIM37	C18R	200 nM	712.958	5190.45	0.13736
1	2	dTRIM37	C18R	200 nM	770.098	5190.45	0.148368
1	1	dTRIM37	C18R	500 nM	650.921	5190.45	0.125407
1	2	dTRIM37	C18R	500 nM	596.811	5190.45	0.114983
2	1	dTRIM37	C18R	DMSO	6080.7	6540.29	0.929729
2	2	dTRIM37	C18R	DMSO	6999.88	6540.29	1.07027
2	1	dTRIM37	C18R	50 nM	5035.66	6540.29	0.769945
2	2	dTRIM37	C18R	50 nM	5395.85	6540.29	0.825017
2	1	dTRIM37	C18R	125 nM	1655.35	6540.29	0.253101
2	2	dTRIM37	C18R	125 nM	1417.9	6540.29	0.216794
2	1	dTRIM37	C18R	150 nM	1334.02	6540.29	0.203969
2	2	dTRIM37	C18R	150 nM	1247.73	6540.29	0.190777
2	1	dTRIM37	C18R	167 nM	1492.76	6540.29	0.228241
2	2	dTRIM37	C18R	167 nM	1423.77	6540.29	0.217692
2	1	dTRIM37	C18R	200 nM	1387.44	6540.29	0.212138
2	2	dTRIM37	C18R	200 nM	1643.95	6540.29	0.251357
2	1	dTRIM37	C18R	500 nM	1145.58	6540.29	0.175158
2	2	dTRIM37	C18R	500 nM	1081.72	6540.29	0.165393
3	1	dTRIM37	C18R	DMSO	8268.85	8340.56	0.991402
3	2	dTRIM37	C18R	DMSO	8412.27	8340.56	1.0086
3	1	dTRIM37	C18R	50 nM	5831.46	8340.56	0.699169
3	2	dTRIM37	C18R	50 nM	4620.86	8340.56	0.554023
3	1	dTRIM37	C18R	125 nM	1382.82	8340.56	0.165795
3	2	dTRIM37	C18R	125 nM	906.204	8340.56	0.10865
3	1	dTRIM37	C18R	150 nM	1180.3	8340.56	0.141513
3	2	dTRIM37	C18R	150 nM	1249.57	8340.56	0.149818
3	1	dTRIM37	C18R	167 nM	1321.78	8340.56	0.158476
3	2	dTRIM37	C18R	167 nM	948.288	8340.56	0.113696
3	1	dTRIM37	C18R	200 nM	1147.23	8340.56	0.137548
3	2	dTRIM37	C18R	200 nM	753.197	8340.56	0.0903053
3	1	dTRIM37	C18R	500 nM	612.23	8340.56	0.073404
3	2	dTRIM37	C18R	500 nM	991.817	8340.56	0.118915
1	1	dTRIM37	dRING	DMSO	5981.85	5676.57	1.05378
1	2	dTRIM37	dRING	DMSO	5371.29	5676.57	0.94622
1	1	dTRIM37	dRING	50 nM	2368.17	5676.57	0.417183
1	2	dTRIM37	dRING	50 nM	2008.29	5676.57	0.353785
1	1	dTRIM37	dRING	125 nM	819.345	5676.57	0.144338
1	2	dTRIM37	dRING	125 nM	834.543	5676.57	0.147015
1	1	dTRIM37	dRING	150 nM	1519.25	5676.57	0.267634
1	2	dTRIM37	dRING	150 nM	1186.62	5676.57	0.209039
1	1	dTRIM37	dRING	167 nM	1101.4	5676.57	0.194026
1	2	dTRIM37	dRING	167 nM	841.341	5676.57	0.148213
1	1	dTRIM37	dRING	200 nM	601.07	5676.57	0.105886
1	2	dTRIM37	dRING	200 nM	1023.67	5676.57	0.180333
1	1	dTRIM37	dRING	500 nM	726.771	5676.57	0.12803
1	2	dTRIM37	dRING	500 nM	478.004	5676.57	0.0842065
2	1	dTRIM37	dRING	DMSO	7168.32	7799.5	0.919075
2	2	dTRIM37	dRING	DMSO	8430.67	7799.5	1.08093
2	1	dTRIM37	dRING	50 nM	3800.99	7799.5	0.487337
2	2	dTRIM37	dRING	50 nM	3576.24	7799.5	0.458522
2	1	dTRIM37	dRING	125 nM	1988.22	7799.5	0.254916
2	2	dTRIM37	dRING	125 nM	1262.53	7799.5	0.161873
2	1	dTRIM37	dRING	150 nM	1368.05	7799.5	0.175402
2	2	dTRIM37	dRING	150 nM	1419.45	7799.5	0.181992
2	1	dTRIM37	dRING	167 nM	1395.55	7799.5	0.178929
2	2	dTRIM37	dRING	167 nM	1176.39	7799.5	0.150829
2	1	dTRIM37	dRING	200 nM	1740.32	7799.5	0.223133
2	2	dTRIM37	dRING	200 nM	1447.17	7799.5	0.185547
2	1	dTRIM37	dRING	500 nM	1850.07	7799.5	0.237204
2	2	dTRIM37	dRING	500 nM	1205.77	7799.5	0.154596
3	1	dTRIM37	dRING	DMSO	6633.38	6434.95	1.03084
3	2	dTRIM37	dRING	DMSO	6236.52	6434.95	0.969164
3	1	dTRIM37	dRING	50 nM	2858.73	6434.95	0.444251
3	2	dTRIM37	dRING	50 nM	3521.79	6434.95	0.54729
3	1	dTRIM37	dRING	125 nM	1016.8	6434.95	0.158012
3	2	dTRIM37	dRING	125 nM	879.453	6434.95	0.136668
3	1	dTRIM37	dRING	150 nM	1487.2	6434.95	0.231112
3	2	dTRIM37	dRING	150 nM	1251.61	6434.95	0.194501
3	1	dTRIM37	dRING	167 nM	1013.93	6434.95	0.157567
3	2	dTRIM37	dRING	167 nM	1144.7	6434.95	0.177887
3	1	dTRIM37	dRING	200 nM	1226.82	6434.95	0.190649
3	2	dTRIM37	dRING	200 nM	630.839	6434.95	0.0980332
3	1	dTRIM37	dRING	500 nM	572.333	6434.95	0.0889413
3	2	dTRIM37	dRING	500 nM	735.744	6434.95	0.114336
1	1	dTRIM37	none	DMSO	6201.71	6188.76	1.00209
1	2	dTRIM37	none	DMSO	6175.81	6188.76	0.997907
1	1	dTRIM37	none	50 nM	3761.05	6188.76	0.607723
1	2	dTRIM37	none	50 nM	2479.77	6188.76	0.40069
1	1	dTRIM37	none	125 nM	1620.75	6188.76	0.261886
1	2	dTRIM37	none	125 nM	1641.43	6188.76	0.265228
1	1	dTRIM37	none	150 nM	4644.66	6188.76	0.750498
1	2	dTRIM37	none	150 nM	4052.49	6188.76	0.654814
1	1	dTRIM37	none	167 nM	4036.09	6188.76	0.652164
1	2	dTRIM37	none	167 nM	4889.69	6188.76	0.790092
1	1	dTRIM37	none	200 nM	4175.49	6188.76	0.674689
1	2	dTRIM37	none	200 nM	4271.1	6188.76	0.690139
1	1	dTRIM37	none	500 nM	3626.05	6188.76	0.585909
1	2	dTRIM37	none	500 nM	2628.54	6188.76	0.424728
2	1	dTRIM37	none	DMSO	5769.77	6232.05	0.925821
2	2	dTRIM37	none	DMSO	6694.34	6232.05	1.07418
2	1	dTRIM37	none	50 nM	2079.47	6232.05	0.333674
2	2	dTRIM37	none	50 nM	3097.25	6232.05	0.496987
2	1	dTRIM37	none	125 nM	2523.08	6232.05	0.404855
2	2	dTRIM37	none	125 nM	2086.18	6232.05	0.33475
2	1	dTRIM37	none	150 nM	3854.24	6232.05	0.618454
2	2	dTRIM37	none	150 nM	4982.61	6232.05	0.799513
2	1	dTRIM37	none	167 nM	2864.45	6232.05	0.459632
2	2	dTRIM37	none	167 nM	2730.81	6232.05	0.438188
2	1	dTRIM37	none	200 nM	2510.7	6232.05	0.402869
2	2	dTRIM37	none	200 nM	2846.07	6232.05	0.456683
2	1	dTRIM37	none	500 nM	2351.24	6232.05	0.377282
2	2	dTRIM37	none	500 nM	1995.61	6232.05	0.320218
3	1	dTRIM37	none	DMSO	3934.38	4523.97	0.869674
3	2	dTRIM37	none	DMSO	5113.56	4523.97	1.13033
3	1	dTRIM37	none	50 nM	2142.41	4523.97	0.47357
3	2	dTRIM37	none	50 nM	1848.16	4523.97	0.408526
3	1	dTRIM37	none	125 nM	1885.31	4523.97	0.416737
3	2	dTRIM37	none	125 nM	1877.13	4523.97	0.414931
3	1	dTRIM37	none	150 nM	1681.76	4523.97	0.371744
3	2	dTRIM37	none	150 nM	2639.29	4523.97	0.583401
3	1	dTRIM37	none	167 nM	1853.33	4523.97	0.40967
3	2	dTRIM37	none	167 nM	2224.24	4523.97	0.491657
3	1	dTRIM37	none	200 nM	2319.73	4523.97	0.512765
3	2	dTRIM37	none	200 nM	2028.15	4523.97	0.448312
3	1	dTRIM37	none	500 nM	2811.14	4523.97	0.621389
3	2	dTRIM37	none	500 nM	2157.21	4523.97	0.476841
1	1	dTRIM37	FLAG-BirA	DMSO	3995.95	3663.53	1.09074
1	2	dTRIM37	FLAG-BirA	DMSO	3331.1	3663.53	0.90926
1	1	dTRIM37	FLAG-BirA	50 nM	1841.43	3663.53	0.502639
1	2	dTRIM37	FLAG-BirA	50 nM	1253.24	3663.53	0.342085
1	1	dTRIM37	FLAG-BirA	125 nM	828.306	3663.53	0.226095
1	2	dTRIM37	FLAG-BirA	125 nM	997.725	3663.53	0.27234
1	1	dTRIM37	FLAG-BirA	150 nM	2145.94	3663.53	0.585758
1	2	dTRIM37	FLAG-BirA	150 nM	2064.65	3663.53	0.563569
1	1	dTRIM37	FLAG-BirA	167 nM	1761.51	3663.53	0.480824
1	2	dTRIM37	FLAG-BirA	167 nM	2497.8	3663.53	0.681802
1	1	dTRIM37	FLAG-BirA	200 nM	1952.26	3663.53	0.53289
1	2	dTRIM37	FLAG-BirA	200 nM	2522.4	3663.53	0.688517
1	1	dTRIM37	FLAG-BirA	500 nM	2292.4	3663.53	0.625736
1	2	dTRIM37	FLAG-BirA	500 nM	2279.93	3663.53	0.622333
2	1	dTRIM37	FLAG-BirA	DMSO	3447.38	4058.28	0.84947
2	2	dTRIM37	FLAG-BirA	DMSO	4669.17	4058.28	1.15053
2	1	dTRIM37	FLAG-BirA	50 nM	2679.85	4058.28	0.660342
2	2	dTRIM37	FLAG-BirA	50 nM	2295.11	4058.28	0.565537
2	1	dTRIM37	FLAG-BirA	125 nM	2005.84	4058.28	0.494259
2	2	dTRIM37	FLAG-BirA	125 nM	1749.64	4058.28	0.43113
2	1	dTRIM37	FLAG-BirA	150 nM	2693.23	4058.28	0.66364
2	2	dTRIM37	FLAG-BirA	150 nM	3881.6	4058.28	0.956465
2	1	dTRIM37	FLAG-BirA	167 nM	2487.02	4058.28	0.612827
2	2	dTRIM37	FLAG-BirA	167 nM	2595.33	4058.28	0.639515
2	1	dTRIM37	FLAG-BirA	200 nM	2495.69	4058.28	0.614964
2	2	dTRIM37	FLAG-BirA	200 nM	3367.69	4058.28	0.829832
2	1	dTRIM37	FLAG-BirA	500 nM	2001.72	4058.28	0.493245
2	2	dTRIM37	FLAG-BirA	500 nM	1706.96	4058.28	0.420611
3	1	dTRIM37	FLAG-BirA	DMSO	2482.12	2499.19	0.993169
3	2	dTRIM37	FLAG-BirA	DMSO	2516.27	2499.19	1.00683
3	1	dTRIM37	FLAG-BirA	50 nM	1392.14	2499.19	0.557036
3	2	dTRIM37	FLAG-BirA	50 nM	1208.35	2499.19	0.483496
3	1	dTRIM37	FLAG-BirA	125 nM	837.192	2499.19	0.334985
3	2	dTRIM37	FLAG-BirA	125 nM	1059.68	2499.19	0.424009
3	1	dTRIM37	FLAG-BirA	150 nM	1817.7	2499.19	0.727317
3	2	dTRIM37	FLAG-BirA	150 nM	1806.26	2499.19	0.722739
3	1	dTRIM37	FLAG-BirA	167 nM	1340.27	2499.19	0.53628
3	2	dTRIM37	FLAG-BirA	167 nM	1455.43	2499.19	0.58236
3	1	dTRIM37	FLAG-BirA	200 nM	1477.87	2499.19	0.591338
3	2	dTRIM37	FLAG-BirA	200 nM	1454.26	2499.19	0.581893
3	1	dTRIM37	FLAG-BirA	500 nM	1117.16	2499.19	0.447008
3	2	dTRIM37	FLAG-BirA	500 nM	1312.33	2499.19	0.525103
1	1	dTRIM37	WT	DMSO	7349.12	7274.12	1.01031
1	2	dTRIM37	WT	DMSO	7199.12	7274.12	0.989689
1	1	dTRIM37	WT	50 nM	6427.45	7274.12	0.883605
1	2	dTRIM37	WT	50 nM	5940.38	7274.12	0.816646
1	1	dTRIM37	WT	125 nM	1655.02	7274.12	0.227521
1	2	dTRIM37	WT	125 nM	1403.52	7274.12	0.192946
1	1	dTRIM37	WT	150 nM	1718.84	7274.12	0.236295
1	2	dTRIM37	WT	150 nM	2087.85	7274.12	0.287024
1	1	dTRIM37	WT	167 nM	1862.56	7274.12	0.256053
1	2	dTRIM37	WT	167 nM	1946.11	7274.12	0.267538
1	1	dTRIM37	WT	200 nM	1865.2	7274.12	0.256416
1	2	dTRIM37	WT	200 nM	1689.54	7274.12	0.232267
1	1	dTRIM37	WT	500 nM	1465.84	7274.12	0.201514
1	2	dTRIM37	WT	500 nM	938.22	7274.12	0.128981
2	1	dTRIM37	WT	DMSO	5951.08	5907.43	1.00739
2	2	dTRIM37	WT	DMSO	5863.78	5907.43	0.992611
2	1	dTRIM37	WT	50 nM	4635.75	5907.43	0.784733
2	2	dTRIM37	WT	50 nM	4230.58	5907.43	0.716147
2	1	dTRIM37	WT	125 nM	1864.35	5907.43	0.315594
2	2	dTRIM37	WT	125 nM	1335.94	5907.43	0.226146
2	1	dTRIM37	WT	150 nM	1717.29	5907.43	0.2907
2	2	dTRIM37	WT	150 nM	1374.3	5907.43	0.23264
2	1	dTRIM37	WT	167 nM	1404.94	5907.43	0.237827
2	2	dTRIM37	WT	167 nM	1263.56	5907.43	0.213893
2	1	dTRIM37	WT	200 nM	1731.96	5907.43	0.293183
2	2	dTRIM37	WT	200 nM	1456.66	5907.43	0.246581
2	1	dTRIM37	WT	500 nM	972.872	5907.43	0.164686
2	2	dTRIM37	WT	500 nM	1013.37	5907.43	0.171542
3	1	dTRIM37	WT	DMSO	4921.1	4481.15	1.09818
3	2	dTRIM37	WT	DMSO	4041.2	4481.15	0.901821
3	1	dTRIM37	WT	50 nM	2296.61	4481.15	0.512504
3	2	dTRIM37	WT	50 nM	2635.77	4481.15	0.58819
3	1	dTRIM37	WT	125 nM	692.828	4481.15	0.154609
3	2	dTRIM37	WT	125 nM	940.267	4481.15	0.209827
3	1	dTRIM37	WT	150 nM	1228.66	4481.15	0.274185
3	2	dTRIM37	WT	150 nM	1386.03	4481.15	0.309302
3	1	dTRIM37	WT	167 nM	848.381	4481.15	0.189322
3	2	dTRIM37	WT	167 nM	826.083	4481.15	0.184346
3	1	dTRIM37	WT	200 nM	631.677	4481.15	0.140963
3	2	dTRIM37	WT	200 nM	679.169	4481.15	0.151561
3	1	dTRIM37	WT	500 nM	840.27	4481.15	0.187512
3	2	dTRIM37	WT	500 nM	1159.42	4481.15	0.258733
1	1	WT	none	DMSO	7673.58	8473.68	0.905578
1	2	WT	none	DMSO	9273.79	8473.68	1.09442
1	1	WT	none	50 nM	7075.41	8473.68	0.834986
1	2	WT	none	50 nM	6282.22	8473.68	0.74138
1	1	WT	none	125 nM	1956	8473.68	0.230833
1	2	WT	none	125 nM	1497.98	8473.68	0.176781
1	1	WT	none	150 nM	1739.15	8473.68	0.205241
1	2	WT	none	150 nM	1886.22	8473.68	0.222598
1	1	WT	none	167 nM	1447.88	8473.68	0.170868
1	2	WT	none	167 nM	1515.95	8473.68	0.178901
1	1	WT	none	200 nM	1483.83	8473.68	0.17511
1	2	WT	none	200 nM	1555.84	8473.68	0.183608
1	1	WT	none	500 nM	1319.62	8473.68	0.155731
1	2	WT	none	500 nM	1234.88	8473.68	0.145732
2	1	WT	none	DMSO	6966.77	6917.37	1.00714
2	2	WT	none	DMSO	6867.98	6917.37	0.99286
2	1	WT	none	50 nM	5003.61	6917.37	0.723339
2	2	WT	none	50 nM	4651.59	6917.37	0.67245
2	1	WT	none	125 nM	790.879	6917.37	0.114332
2	2	WT	none	125 nM	563.96	6917.37	0.0815281
2	1	WT	none	150 nM	706.944	6917.37	0.102198
2	2	WT	none	150 nM	1228.54	6917.37	0.177602
2	1	WT	none	167 nM	481.982	6917.37	0.069677
2	2	WT	none	167 nM	469.426	6917.37	0.0678619
2	1	WT	none	200 nM	368.625	6917.37	0.0532897
2	2	WT	none	200 nM	196.595	6917.37	0.0284205
2	1	WT	none	500 nM	867.691	6917.37	0.125436
2	2	WT	none	500 nM	1170.98	6917.37	0.169282
3	1	WT	none	DMSO	6903281	6.78937e+06	1.01678
3	2	WT	none	DMSO	6675462	6.78937e+06	0.983222
3	1	WT	none	50 nM	3764637	6.78937e+06	0.55449
3	2	WT	none	50 nM	6002378	6.78937e+06	0.884084
3	1	WT	none	125 nM	1111731	6.78937e+06	0.163746
3	2	WT	none	125 nM	2210147	6.78937e+06	0.32553
3	1	WT	none	150 nM	2471667	6.78937e+06	0.364049
3	2	WT	none	150 nM	2784307	6.78937e+06	0.410098
3	1	WT	none	167 nM	1975740	6.78937e+06	0.291005
3	2	WT	none	167 nM	2990701	6.78937e+06	0.440497
3	1	WT	none	200 nM	1043342	6.78937e+06	0.153673
3	2	WT	none	200 nM	1646236	6.78937e+06	0.242473
3	1	WT	none	500 nM	1266418	6.78937e+06	0.186529
3	2	WT	none	500 nM	2289101	6.78937e+06	0.337159

## Sheet: Figure4C
Replicate 1
	RPE1							dTRIM37 pool
	DMSO	50nM	125 nM	150 nM	167 nM	200 nM	500 nM	DMSO	50nM	125 nM	150 nM	167 nM	200 nM	500 nM
0	0	0	0	0	1	5	52	0	2	1	0	7	46	57
1	4	5	9	1	4	2	23	6	8	7	6	16	33	15
2	67	42	40	33	13	14	0	57	48	40	24	28	11	3
3	0	11	21	22	19	19	0	4	9	12	20	21	1	0
4+	0	16	21	29	41	39	0	1	8	14	20	21	3	0
Replicate 2
	RPE1							dTRIM37 pool
	DMSO	50nM	125 nM	150 nM	167 nM	200 nM	500 nM	DMSO	50nM	125 nM	150 nM	167 nM	200 nM	500 nM
0	0	0	0	0	0	2	48	0	0	0	0	0	2	59
1	5	16	11	6	4	4	21	4	9	6	2	2	6	18
2	50	58	46	31	21	18	0	61	40	35	18	11	8	0
3	0	6	17	20	29	17	0	0	4	21	12	11	18	0
4+	0	5	12	29	34	39	0	0	7	11	27	40	37	0
Replicate 3
	RPE1							dTRIM37 pool
	DMSO	50nM	125 nM	150 nM	167 nM	200 nM	500 nM	DMSO	50nM	125 nM	150 nM	167 nM	200 nM	500 nM
0	0	2	0	0	0	3	50	0	0	1	1	1	13	49
1	13	4	6	11	3	5	19	14	8	2	3	4	14	21
2	47	50	48	28	33	31	0	55	45	39	34	28	27	2
3	0	0	8	16	18	30	0	4	15	15	18	25	17	3
4+	0	0	3	20	31	31	0	6	9	30	27	27	27	2

## Sheet: Figure4D
Replicate	Technical replicate	Condition	Time (s)	ROI1	ROI2	ROI3		Replicate	Technical replicate	Condition	Time (s)	ROI1	ROI2	ROI3		Replicate	Technical replicate	Condition	Time (s)	ROI1	ROI2	ROI3
1	1	DMSO	0	259.04	242.18	2.26		2	1	DMSO	0	224.69	38.63	2.15		3	1	DMSO	0	236.28	80.47	2.3
1	1	DMSO	4	266.28	263.95	2.37		2	1	DMSO	4	224.62	40.5	2.41		3	1	DMSO	4	237.49	78.87	2.69
1	1	DMSO	8	256.19	252.36	2.49		2	1	DMSO	8	224.06	39.97	2.45		3	1	DMSO	8	244.03	78.04	2.51
1	1	DMSO	10	44.73	241.71	2.2		2	1	DMSO	9.966	51.76	37.07	2.22		3	1	DMSO	10	106.16	73.59	2.37
1	1	DMSO	14	127.98	232.98	2.35		2	1	DMSO	13.905	106.12	36.27	2.33		3	1	DMSO	14	144.54	73.56	2.76
1	1	DMSO	18	175.95	259.4	2.63		2	1	DMSO	17.905	126.44	36.09	2.5		3	1	DMSO	18	162.44	70.78	2.19
1	1	DMSO	22	200.29	246.02	2.35		2	1	DMSO	21.906	131.32	36.46	2.02		3	1	DMSO	22	167.54	71.3	2.35
1	1	DMSO	26	229.48	258.21	2.25		2	1	DMSO	25.906	138.65	37.65	2.35		3	1	DMSO	26	174.45	70.07	2.59
1	1	DMSO	30	239.22	256.24	2.29		2	1	DMSO	29.905	142.63	37.38	2.12		3	1	DMSO	30	171.1	66.94	2.34
1	1	DMSO	34	234.85	251.95	2.28		2	1	DMSO	33.905	141.45	37.46	2.24		3	1	DMSO	34	174.06	67.23	2.48
1	1	DMSO	38	244.93	255.44	2.3		2	1	DMSO	37.902	137.36	37.12	2.37		3	1	DMSO	38	177.55	67.17	2.42
1	1	DMSO	42	257.1	244.52	2.11		2	1	DMSO	41.904	141.74	38.16	2.45		3	1	DMSO	42	176.77	66.86	2.59
1	1	DMSO	46	261.87	221.12	2.43		2	1	DMSO	45.907	144.53	35.24	2.08		3	1	DMSO	46	180.28	65.47	2.44
1	1	DMSO	50	260.93	220.25	2.26		2	1	DMSO	49.906	143.32	37.65	2.37		3	1	DMSO	50	185.06	61.89	2.27
1	1	DMSO	54	245.33	223.6	2.35		2	1	DMSO	53.906	139.59	37.78	2.38		3	1	DMSO	54	188.11	62.35	2.35
1	1	DMSO	58	234.27	212.55	2.24		2	1	DMSO	57.907	142.29	36.38	2.39		3	1	DMSO	58	184.69	64.04	2.34
1	1	DMSO	62	231.25	204.22	2.46		2	1	DMSO	61.906	150.23	35.88	2.78		3	1	DMSO	62	187.24	67.46	2.59
1	1	DMSO	66	252.02	209.88	2.32		2	1	DMSO	65.906	144.11	36.94	2.31		3	1	DMSO	66	190.45	69.27	2.66
1	1	DMSO	70	251.4	210.24	2.22		2	1	DMSO	69.905	144.5	36.27	2.26		3	1	DMSO	70	192.67	68.17	2.22
1	1	DMSO	74	241.94	214.65	2.49		2	1	DMSO	73.907	146.35	36.98	2.71		3	1	DMSO	74	185.8	69.14	2.13
1	1	DMSO	78	233.26	205.06	2.1		2	1	DMSO	77.906	149.37	35.49	2.31		3	1	DMSO	78	185.14	69.62	2.51
1	1	DMSO	82	226.17	202.73	2.21		2	1	DMSO	81.905	156.24	34.05	2.18		3	1	DMSO	82	185.12	67.93	1.84
1	1	DMSO	86	228.76	208.26	2.12		2	1	DMSO	85.907	142.88	36.2	2.12		3	1	DMSO	86	181.62	69.9	2.28
1	1	DMSO	90	239.98	207.23	2.33		2	1	DMSO	89.906	150.02	35.58	2.14		3	1	DMSO	90	173.54	68.47	2.21
1	1	DMSO	94	252.51	195.64	2.4		2	1	DMSO	93.906	149.49	35.75	2.42		3	1	DMSO	94	182.53	67.93	2.49
1	1	DMSO	98	259.89	187.49	2.4		2	1	DMSO	97.906	150.32	34.76	2.35		3	1	DMSO	98	182.66	68.07	2.69
1	2	DMSO	0	203.56	54.05	2.21		2	2	DMSO	0	188.7	84.68	2.64		3	2	DMSO	0	1076.7	665.23	2.11
1	2	DMSO	4	208.22	54.44	2.79		2	2	DMSO	3.999	193.35	84.16	2.84		3	2	DMSO	4	1098.75	682.59	2.67
1	2	DMSO	8	214.61	54.44	2.43		2	2	DMSO	8	185.35	83.13	2.63		3	2	DMSO	8	1113.2	685.75	2.3
1	2	DMSO	10	45.35	53.18	2.53		2	2	DMSO	10.015	33.29	80.22	2.48		3	2	DMSO	10	246.77	601.78	2.27
1	2	DMSO	14	112.12	53.07	2.49		2	2	DMSO	13.957	96.85	81.65	3.24		3	2	DMSO	14	360.25	516.89	2.22
1	2	DMSO	18	127.69	53.45	2.38		2	2	DMSO	17.957	111.63	79.82	2.35		3	2	DMSO	18	391.09	620.88	2.35
1	2	DMSO	22	132.41	52.75	2.46		2	2	DMSO	21.957	118.73	81.04	2.32		3	2	DMSO	22	415.52	638.77	2.38
1	2	DMSO	26	134.2	52.66	2.33		2	2	DMSO	25.957	124.98	81.17	2.49		3	2	DMSO	26	365.92	675.87	2.52
1	2	DMSO	30	138.3	51.85	2.45		2	2	DMSO	29.955	123.13	80.66	2.58		3	2	DMSO	30	368.11	670.77	2.34
1	2	DMSO	34	139.47	50.9	2.22		2	2	DMSO	33.957	127.06	79.74	2.58		3	2	DMSO	34	400.59	668.17	2.48
1	2	DMSO	38	139.25	51.65	2.21		2	2	DMSO	37.955	119.83	79.3	2.54		3	2	DMSO	38	415.18	651.8	2.17
1	2	DMSO	42	138	51.45	2.31		2	2	DMSO	41.956	127.04	79.52	2.36		3	2	DMSO	42	413.69	668.57	2.45
1	2	DMSO	46	139.16	53.13	2.42		2	2	DMSO	45.957	121.06	78.96	2.74		3	2	DMSO	46	414.64	693.8	2.39
1	2	DMSO	50	136.67	52.51	2.4		2	2	DMSO	49.955	119.41	79.09	2.74		3	2	DMSO	50	383.62	679.18	2.31
1	2	DMSO	54	136.61	52.07	2.49		2	2	DMSO	53.957	119.72	78.4	2.9		3	2	DMSO	54	403.53	659.39	2.36
1	2	DMSO	58	140.63	53.27	2.83		2	2	DMSO	57.953	122.77	79	2.8		3	2	DMSO	58	466.03	673.07	2.45
1	2	DMSO	62	138.02	50.72	2.22		2	2	DMSO	61.952	122.47	76.75	2.09		3	2	DMSO	62	481.88	669.12	1.99
1	2	DMSO	66	140	51.23	2.06		2	2	DMSO	65.958	113.32	76.66	2.56		3	2	DMSO	66	487.77	679.88	2.61
1	2	DMSO	70	139.25	53.3	2.65		2	2	DMSO	69.956	118.73	77.65	2.18		3	2	DMSO	70	477.29	660.52	2.18
1	2	DMSO	74	136.92	52	2.08		2	2	DMSO	73.957	117.64	77.82	2.47		3	2	DMSO	74	447.33	676.31	2.19
1	2	DMSO	78	134.45	53.76	2.22		2	2	DMSO	77.957	120.81	77.88	2.51		3	2	DMSO	78	467.96	693.03	2.02
1	2	DMSO	82	131.33	52.2	2.31		2	2	DMSO	81.957	123.13	76.49	2.1		3	2	DMSO	82	512.64	691.11	2.08
1	2	DMSO	86	132.46	53.32	2.4		2	2	DMSO	85.957	121.37	78.67	2.34		3	2	DMSO	86	539.11	673.1	2.41
1	2	DMSO	90	131.9	52.07	2.39		2	2	DMSO	89.955	123.25	76.91	2.51		3	2	DMSO	90	550.3	680.91	2.48
1	2	DMSO	94	131.66	54.2	2.5		2	2	DMSO	93.957	125.71	78.88	2.59		3	2	DMSO	94	503.4	671.48	2.41
1	2	DMSO	98	131.83	52.42	2.59		2	2	DMSO	97.956	121.92	77.52	2.43		3	2	DMSO	98	504.85	671.13	2.04
1	3	DMSO	0	324.91	299.7	2.38		2	3	DMSO	0	130.06	180.16	8.78		3	3	DMSO	0	700.17	887.98	2.08
1	3	DMSO	4	324.06	310.73	2.52		2	3	DMSO	3.998	130.3	189.18	7.76		3	3	DMSO	4	684.21	880.1	2.32
1	3	DMSO	8	324.39	311.27	2.46		2	3	DMSO	7.999	130.34	193.84	6.66		3	3	DMSO	8	707	892.24	2.6
1	3	DMSO	10	36.26	287.7	2		2	3	DMSO	9.966	43.62	189.16	7.77		3	3	DMSO	10	188.36	765.81	2.31
1	3	DMSO	14	140.08	294.87	2.59		2	3	DMSO	13.906	80.33	191.03	7.29		3	3	DMSO	14	457.54	749.79	2.41
1	3	DMSO	18	176.64	288.54	2.86		2	3	DMSO	17.907	86.81	192.66	7.5		3	3	DMSO	18	559.9	751.21	2.37
1	3	DMSO	22	191.03	304.87	2.37		2	3	DMSO	21.906	83.73	200.73	6.13		3	3	DMSO	22	620	767.98	2.45
1	3	DMSO	26	199.49	292.54	2.47		2	3	DMSO	25.907	92.56	197.31	7.13		3	3	DMSO	26	663.14	767.72	2.18
1	3	DMSO	30	200.75	300.49	2.8		2	3	DMSO	29.906	90.5	198.98	7.29		3	3	DMSO	30	674.48	763.22	2.33
1	3	DMSO	34	202.06	305.39	2.44		2	3	DMSO	33.907	92.51	203.74	5.99		3	3	DMSO	34	676.13	760.8	2.21
1	3	DMSO	38	207.84	295.8	2.32		2	3	DMSO	37.907	97.22	214.39	5.87		3	3	DMSO	38	687.71	764.43	2.33
1	3	DMSO	42	209.9	287.12	2.75		2	3	DMSO	41.906	97.05	219.7	5.99		3	3	DMSO	42	697.52	775.12	2.25
1	3	DMSO	46	212.43	284.72	2.88		2	3	DMSO	45.907	91.21	235.3	5.33		3	3	DMSO	46	699.74	774.4	2.47
1	3	DMSO	50	216.19	276.63	3.01		2	3	DMSO	49.905	80.76	234.79	4.53		3	3	DMSO	50	719.89	780.9	2.06
1	3	DMSO	54	213.17	288.23	2.71		2	3	DMSO	53.906	83.6	238.73	5.45		3	3	DMSO	54	725.48	783.86	2.55
1	3	DMSO	58	212.47	275.24	2.28		2	3	DMSO	57.907	83.62	242.79	4.97		3	3	DMSO	58	725.25	796.1	2.3
1	3	DMSO	62	217.12	263.07	2.52		2	3	DMSO	61.905	81.05	244.18	4.21		3	3	DMSO	62	693.69	770.41	2.2
1	3	DMSO	66	213.91	264.95	2.69		2	3	DMSO	65.907	81.69	247.69	4.1		3	3	DMSO	66	711.74	786.93	2.29
1	3	DMSO	70	216.88	265.54	2.37		2	3	DMSO	69.904	86.98	242.69	4.78		3	3	DMSO	70	711.09	768.24	2.51
1	3	DMSO	74	219.75	262.98	2.53		2	3	DMSO	73.906	89.16	239.8	4.78		3	3	DMSO	74	702.34	788.15	2.17
1	3	DMSO	78	218.27	270.57	2.92		2	3	DMSO	77.907	97.04	238.72	5.47		3	3	DMSO	78	695.02	795.95	2.16
1	3	DMSO	82	224.15	264.77	2.25		2	3	DMSO	81.906	99.34	239.54	5.13		3	3	DMSO	82	739.33	806.67	2.5
1	3	DMSO	86	223.5	258.62	2.86		2	3	DMSO	85.907	104.03	237.59	4.49		3	3	DMSO	86	720.65	802.78	2.52
1	3	DMSO	90	222.4	262.71	2.86		2	3	DMSO	89.907	106.69	240.75	4.24		3	3	DMSO	90	721.08	807.31	2.03
1	3	DMSO	94	223.98	259.38	2.84		2	3	DMSO	93.907	112.68	239.43	4.79		3	3	DMSO	94	701.52	805.72	2.3
1	3	DMSO	98	222.42	260.78	2.48		2	3	DMSO	97.904	107.53	239.28	4.36		3	3	DMSO	98	717.6	816.35	2.13
1	4	DMSO	0	190.88	321.44	2.17		2	4	DMSO	0	336.93	214.73	3.03		3	4	DMSO	0	220.82	474.35	2.32
1	4	DMSO	4	191.69	322.43	2.25		2	4	DMSO	4.004	338.43	225.63	3.31		3	4	DMSO	4	224.64	478.29	2.37
1	4	DMSO	8	185.47	323.66	2.2		2	4	DMSO	8.003	327.96	232.69	2.89		3	4	DMSO	8	220.91	475.61	2.41
1	4	DMSO	10	50.93	315.97	2.74		2	4	DMSO	10.965	38.67	229.65	3.56		3	4	DMSO	10	72.87	446.41	2.08
1	4	DMSO	14	97.05	306.98	2.03		2	4	DMSO	14.907	141.45	225.24	3.98		3	4	DMSO	14	115.75	418.72	2.33
1	4	DMSO	18	106.77	323.61	2.76		2	4	DMSO	18.907	173.11	224.92	4.84		3	4	DMSO	18	119.91	435.11	2.14
1	4	DMSO	22	110.95	302.47	2.37		2	4	DMSO	22.908	192.28	217.82	4.15		3	4	DMSO	22	125.99	427.27	2.26
1	4	DMSO	26	110.79	316.02	2.09		2	4	DMSO	26.907	201.61	214.3	3.73		3	4	DMSO	26	128.29	430.37	2.33
1	4	DMSO	30	116.08	313	2.33		2	4	DMSO	30.907	205.07	201.2	3.82		3	4	DMSO	30	131.59	431.88	2.1
1	4	DMSO	34	117.12	310.81	2.27		2	4	DMSO	34.906	207.77	192.87	3.49		3	4	DMSO	34	129.12	433.39	2.55
1	4	DMSO	38	118.93	310.02	2.28		2	4	DMSO	38.908	201.44	198.32	3.06		3	4	DMSO	38	121.26	420.11	2.29
1	4	DMSO	42	114.9	314.73	2.1		2	4	DMSO	42.907	209.21	205.97	2.97		3	4	DMSO	42	116.22	413.89	2.28
1	4	DMSO	46	117.02	318.39	2.19		2	4	DMSO	46.907	209.03	196.79	3.22		3	4	DMSO	46	119.01	426.81	2.56
1	4	DMSO	50	118.31	317.42	2.21		2	4	DMSO	50.906	200.15	199.93	2.78		3	4	DMSO	50	133.67	413.97	2.26
1	4	DMSO	54	118.54	313.11	2.53		2	4	DMSO	54.907	201.34	180.53	2.98		3	4	DMSO	54	132.13	414.95	2.3
1	4	DMSO	58	105.88	319.13	2.52		2	4	DMSO	58.908	199.81	193.62	2.85		3	4	DMSO	58	124.74	435.81	2
1	4	DMSO	62	109.77	326.07	2.39		2	4	DMSO	62.907	203.54	192.75	2.45		3	4	DMSO	62	129.62	434.47	2.25
1	4	DMSO	66	110.26	313.56	2.27		2	4	DMSO	66.907	212.47	175.76	2.9		3	4	DMSO	66	133.07	420.21	2.08
1	4	DMSO	70	104.5	328.29	2.66		2	4	DMSO	70.907	210.08	164.65	2.38		3	4	DMSO	70	133.07	430.06	2.41
1	4	DMSO	74	115.81	294.76	2.09		2	4	DMSO	74.908	208.27	156.74	3.41		3	4	DMSO	74	138.72	422.02	2.11
1	4	DMSO	78	119.57	315.28	2.68		2	4	DMSO	78.909	205.79	164.03	2.3		3	4	DMSO	78	134.42	416.16	2.51
1	4	DMSO	82	119.62	316.97	2.49		2	4	DMSO	82.907	207.35	161.1	3.14		3	4	DMSO	82	136.36	407.25	2.52
1	4	DMSO	86	112.56	329.29	2.76		2	4	DMSO	86.908	209.4	167.82	3.21		3	4	DMSO	86	136.75	395.06	2.12
1	4	DMSO	90	117.45	298.13	2.15		2	4	DMSO	90.908	203.35	171.33	3.03		3	4	DMSO	90	134.99	400.01	2
1	4	DMSO	94	116.16	317.9	2.28		2	4	DMSO	94.907	200.86	173.57	3.19		3	4	DMSO	94	133.46	404.96	2.1
1	4	DMSO	98	125.17	320.97	2.61		2	4	DMSO	98.908	203.54	181.43	2.3		3	4	DMSO	98	135.06	399.57	2.33
1	5	DMSO	0	341.06	442.02	6.11		2	5	DMSO	0	351.08	237.55	10.62		3	5	DMSO	0	563.71	763.39	2.44
1	5	DMSO	4	344.84	442.89	6.08		2	5	DMSO	4.001	345.19	239.06	9.98		3	5	DMSO	4	562.26	760.9	2.23
1	5	DMSO	8	348.79	444.05	6.17		2	5	DMSO	8	351.75	238.73	11.35		3	5	DMSO	8	565.65	781.53	2.55
1	5	DMSO	10	76.54	410.09	6.35		2	5	DMSO	10.974	132.14	228.6	10.59		3	5	DMSO	10	209.57	702.16	2.47
1	5	DMSO	14	156.42	419.77	6.24		2	5	DMSO	14.914	215.82	228.41	10.14		3	5	DMSO	14	373.37	683.12	2.16
1	5	DMSO	18	166.35	433.2	6.13		2	5	DMSO	18.913	245.66	230.98	10.39		3	5	DMSO	18	429.33	680.11	2.31
1	5	DMSO	22	177.25	432.06	6.94		2	5	DMSO	22.912	251.72	230.9	10.69		3	5	DMSO	22	456.81	723.9	2.5
1	5	DMSO	26	180.03	430.4	6.66		2	5	DMSO	26.914	250.51	228.45	10.24		3	5	DMSO	26	483.82	733.9	2.69
1	5	DMSO	30	184.13	421.48	6.73		2	5	DMSO	30.913	254.06	227.76	10.2		3	5	DMSO	30	486.61	725.45	2.22
1	5	DMSO	34	185.18	430.1	6.33		2	5	DMSO	34.913	253.42	228.48	10.24		3	5	DMSO	34	492.78	755.07	2.47
1	5	DMSO	38	184.05	429.49	6.15		2	5	DMSO	38.914	257.09	236.43	11.14		3	5	DMSO	38	495.11	754.04	2.13
1	5	DMSO	42	184.01	435.89	6.56		2	5	DMSO	42.913	246.12	233.76	10.15		3	5	DMSO	42	517.79	778.59	2.04
1	5	DMSO	46	186.11	432.57	6.04		2	5	DMSO	46.91	248.35	231.83	10.55		3	5	DMSO	46	513.42	720.12	2.48
1	5	DMSO	50	188.03	433.04	6.96		2	5	DMSO	50.913	246.64	239.66	11.25		3	5	DMSO	50	529.72	773.85	2.61
1	5	DMSO	54	188.62	439.89	6.61		2	5	DMSO	54.914	255.85	232.89	10.64		3	5	DMSO	54	531.24	750.38	2.13
1	5	DMSO	58	191.32	437.72	6.24		2	5	DMSO	58.913	256.28	240.97	10.61		3	5	DMSO	58	523.7	751.88	2.24
1	5	DMSO	62	189.01	439.87	6.47		2	5	DMSO	62.914	259.7	239	10.39		3	5	DMSO	62	511.6	775.72	2.03
1	5	DMSO	66	189.63	438.33	7.08		2	5	DMSO	66.914	252.07	239.63	9.58		3	5	DMSO	66	504.59	753.13	2.43
1	5	DMSO	70	191.88	435.69	5.76		2	5	DMSO	70.913	256.19	225.07	10.39		3	5	DMSO	70	505.48	775	2.6
1	5	DMSO	74	193.13	438.06	5.82		2	5	DMSO	74.913	255.68	216.27	9.98		3	5	DMSO	74	480.37	763.33	2.09
1	5	DMSO	78	196	434.18	6.65		2	5	DMSO	78.913	258.94	223.74	10.38		3	5	DMSO	78	495.69	746.75	2.38
1	5	DMSO	82	193.01	440.84	6.59		2	5	DMSO	82.909	274.97	214.75	9.86		3	5	DMSO	82	512.52	721.72	1.98
1	5	DMSO	86	196.37	439.84	6.55		2	5	DMSO	86.912	273.58	218.32	10.79		3	5	DMSO	86	522.38	742.55	2.19
1	5	DMSO	90	199.89	439.14	6.24		2	5	DMSO	90.913	277.47	221.52	10.5		3	5	DMSO	90	532.99	728.03	2.33
1	5	DMSO	94	200.62	439.09	6.32		2	5	DMSO	94.914	276.34	221.36	9.71		3	5	DMSO	94	528.7	732.41	2.34
1	5	DMSO	98	200.86	442.51	6.43		2	5	DMSO	98.912	278.63	212.33	10.87		3	5	DMSO	98	529.62	626.35	2.3
1	6	DMSO	0	281.6	407.39	2.27		2	6	DMSO	0	133.94	133.79	2.17		3	6	DMSO	0	142.1	115.38	2.48
1	6	DMSO	4	280.76	380.07	1.97		2	6	DMSO	4.002	131.84	131.12	2.04		3	6	DMSO	4	138.21	114.38	2.53
1	6	DMSO	8	292.09	407.16	2.57		2	6	DMSO	8.002	138.29	118.11	2.28		3	6	DMSO	8	140.87	114.24	2.4
1	6	DMSO	10	50.95	417.06	2.05		2	6	DMSO	10.966	34.76	126.75	2.15		3	6	DMSO	10	49.2	94.18	2.38
1	6	DMSO	14	137.85	393.78	2.66		2	6	DMSO	14.905	55.82	125.87	1.99		3	6	DMSO	14	86	103.11	2.09
1	6	DMSO	18	158.52	404.01	1.95		2	6	DMSO	18.903	66.37	120.1	2.31		3	6	DMSO	18	95.09	103.59	2.46
1	6	DMSO	22	175.93	393.13	2.44		2	6	DMSO	22.904	67.98	125.27	2.76		3	6	DMSO	22	96.99	107.1	2.36
1	6	DMSO	26	183.01	405.05	2.26		2	6	DMSO	26.906	71.61	122.03	2.23		3	6	DMSO	26	99.31	104.9	2.32
1	6	DMSO	30	180.53	409.12	2.22		2	6	DMSO	30.907	70.67	127.36	2.48		3	6	DMSO	30	95.59	105.59	2.1
1	6	DMSO	34	189.4	367.37	2.55		2	6	DMSO	34.905	72.95	128.48	2.48		3	6	DMSO	34	102.25	109.02	2.51
1	6	DMSO	38	191.76	383.37	2.51		2	6	DMSO	38.906	72.1	132.78	2.56		3	6	DMSO	38	99.17	103.11	2.49
1	6	DMSO	42	194.29	372.31	1.91		2	6	DMSO	42.907	65.67	142.42	2.25		3	6	DMSO	42	99.32	107.32	2.69
1	6	DMSO	46	196.1	380.42	2.38		2	6	DMSO	46.907	65.58	139.49	2.27		3	6	DMSO	46	100.2	103.98	2.28
1	6	DMSO	50	199.76	347.24	2.26		2	6	DMSO	50.906	63.62	144.74	1.97		3	6	DMSO	50	102.05	107.96	2.61
1	6	DMSO	54	196.37	370.91	2.05		2	6	DMSO	54.904	66.25	140.83	2.09		3	6	DMSO	54	99.35	103.99	2.11
1	6	DMSO	58	199.66	398.69	2.43		2	6	DMSO	58.907	69.34	134.8	2.34		3	6	DMSO	58	98.71	103.88	2.15
1	6	DMSO	62	197.69	364.42	2.41		2	6	DMSO	62.905	70.61	129.95	2.22		3	6	DMSO	62	100.88	105.77	2.31
1	6	DMSO	66	202.74	435.61	2.27		2	6	DMSO	66.904	70.57	133.06	2.04		3	6	DMSO	66	101.8	105.68	2.1
1	6	DMSO	70	199.6	465.89	2.27		2	6	DMSO	70.907	69.53	130.79	2.6		3	6	DMSO	70	100.46	106.72	2.25
1	6	DMSO	74	202.73	449.82	2.49		2	6	DMSO	74.907	68.33	130.55	2.24		3	6	DMSO	74	103.62	106.62	2.84
1	6	DMSO	78	216.13	412.74	2.45		2	6	DMSO	78.906	70.08	134.33	1.9		3	6	DMSO	78	98.67	105.31	2.32
1	6	DMSO	82	221.78	421.52	2.54		2	6	DMSO	82.906	69.64	134.85	2.25		3	6	DMSO	82	97.9	104.49	2.45
1	6	DMSO	86	214.48	408.33	2.1		2	6	DMSO	86.907	71.75	130.35	1.94		3	6	DMSO	86	101.83	105.07	2.31
1	6	DMSO	90	209.26	411.45	2.18		2	6	DMSO	90.906	64.18	142.83	2.28		3	6	DMSO	90	96.12	105.01	2.25
1	6	DMSO	94	213.9	439.57	2.17		2	6	DMSO	94.906	68.37	130.91	1.88		3	6	DMSO	94	96.46	104.5	2.48
1	6	DMSO	98	216.93	412.33	1.82		2	6	DMSO	98.907	66.34	144.91	2.32		3	6	DMSO	98	101.54	108.6	2.64
1	7	DMSO	0	249.22	183.52	3.05		2	7	DMSO	0	210.69	229.54	8.71		3	7	DMSO	0	520.44	436.63	2.42
1	7	DMSO	4	247.4	183.19	3.06		2	7	DMSO	4.003	193.02	227.19	8.97		3	7	DMSO	4	508.3	418.48	2.07
1	7	DMSO	8	250.62	185.54	3.16		2	7	DMSO	8.003	177.44	227.67	9.58		3	7	DMSO	8	515.13	423.56	2.55
1	7	DMSO	10	50.69	178.9	2.8		2	7	DMSO	10.967	85.63	221.07	9.44		3	7	DMSO	10	119.18	334.56	2.36
1	7	DMSO	14	160.84	185.23	3.17		2	7	DMSO	14.909	110.59	222.13	9.58		3	7	DMSO	14	221.5	352.48	2.44
1	7	DMSO	18	201.2	177.63	3.01		2	7	DMSO	18.909	120.77	220.13	9.82		3	7	DMSO	18	246.79	339.34	2.14
1	7	DMSO	22	218.69	179.26	2.58		2	7	DMSO	22.909	114.69	221.34	9.01		3	7	DMSO	22	271.95	386.84	2.41
1	7	DMSO	26	231.62	180.68	3.22		2	7	DMSO	26.908	109.5	220.25	9.57		3	7	DMSO	26	274.86	373.24	2.29
1	7	DMSO	30	237.01	184.36	3.22		2	7	DMSO	30.909	116.67	220.95	9.75		3	7	DMSO	30	283.48	394.34	2.09
1	7	DMSO	34	244.72	186.54	3.27		2	7	DMSO	34.907	109.23	218.29	9.2		3	7	DMSO	34	279.95	401.21	2.55
1	7	DMSO	38	247.35	188.98	2.99		2	7	DMSO	38.907	109.86	219.02	9.99		3	7	DMSO	38	285.37	412.91	2.46
1	7	DMSO	42	246.27	185.46	3.11		2	7	DMSO	42.909	106.4	214.32	8.65		3	7	DMSO	42	286.18	417.76	2.21
1	7	DMSO	46	254.69	183.8	2.88		2	7	DMSO	46.909	115.92	215.75	10.39		3	7	DMSO	46	274.78	403.64	2.41
1	7	DMSO	50	253.74	180.04	2.96		2	7	DMSO	50.908	117.3	211.78	9.53		3	7	DMSO	50	290.98	422.78	2.69
1	7	DMSO	54	251.57	182.26	2.64		2	7	DMSO	54.909	125.55	212.78	9.74		3	7	DMSO	54	287.23	413.4	1.99
1	7	DMSO	58	252.17	181.69	2.57		2	7	DMSO	58.909	125.01	212.72	9.73		3	7	DMSO	58	281.69	420.14	2.4
1	7	DMSO	62	256.49	187.15	2.87		2	7	DMSO	62.909	122.75	215.58	9.5		3	7	DMSO	62	304.88	444.29	2.67
1	7	DMSO	66	255.03	184.97	2.56		2	7	DMSO	66.908	127.94	215.41	9.68		3	7	DMSO	66	298.46	437.13	2.06
1	7	DMSO	70	257.1	180.29	2.96		2	7	DMSO	70.907	126.54	215.49	9.77		3	7	DMSO	70	303.83	451.06	2.37
1	7	DMSO	74	256.31	180.49	2.4		2	7	DMSO	74.904	126.14	215	9.85		3	7	DMSO	74	301.4	431.68	2.48
1	7	DMSO	78	250.99	183.18	2.87		2	7	DMSO	78.908	139.89	213.44	9.21		3	7	DMSO	78	292.37	436.91	2.44
1	7	DMSO	82	252.72	180.94	2.83		2	7	DMSO	82.907	137.02	213.69	9.76		3	7	DMSO	82	307.11	430.02	2.35
1	7	DMSO	86	253.24	183.74	2.82		2	7	DMSO	86.909	133.98	213.24	9.8		3	7	DMSO	86	298.07	410.26	2.08
1	7	DMSO	90	251.22	183.39	2.42		2	7	DMSO	90.908	137.9	206.79	10.01		3	7	DMSO	90	308.84	418.57	2.63
1	7	DMSO	94	256.79	181.64	2.38		2	7	DMSO	94.909	141.7	207.58	9.19		3	7	DMSO	94	305.51	416.64	2.8
1	7	DMSO	98	257.59	180.64	2.54		2	7	DMSO	98.909	138.4	209.44	10.17		3	7	DMSO	98	295.79	421.74	2.43
1	8	DMSO	0	537.09	339.7	9.84		2	8	DMSO	0	309.41	482.06	2.78		3	8	DMSO	0	307.84	288.55	2.33
1	8	DMSO	4	563.78	334.99	10.45		2	8	DMSO	4.003	309.7	482.43	2.2		3	8	DMSO	4	309.38	288.64	2.03
1	8	DMSO	8	564.82	325.93	10.66		2	8	DMSO	8.004	313.24	470.45	1.9		3	8	DMSO	8	301.4	296.61	1.99
1	8	DMSO	10	100.87	315.97	10.35		2	8	DMSO	10.977	93.16	453.25	2.43		3	8	DMSO	10	116.65	280.65	2.46
1	8	DMSO	14	194.44	316.34	9.27		2	8	DMSO	14.916	136.26	458.84	2.31		3	8	DMSO	14	243.44	279.88	2.43
1	8	DMSO	18	220.38	313.21	9.65		2	8	DMSO	18.916	143.48	448.37	2.07		3	8	DMSO	18	282.08	278.3	2.42
1	8	DMSO	22	231.19	306.92	10.36		2	8	DMSO	22.917	148.08	447.98	2.11		3	8	DMSO	22	300.9	278.38	2.4
1	8	DMSO	26	229.64	324.58	10.05		2	8	DMSO	26.917	153.65	451.51	2.52		3	8	DMSO	26	263.46	269.82	2.4
1	8	DMSO	30	232.67	328.49	9.49		2	8	DMSO	30.917	149.6	425.9	2.2		3	8	DMSO	30	304.33	275.81	2.06
1	8	DMSO	34	245.47	330.23	9.01		2	8	DMSO	34.917	145.47	400.38	2.02		3	8	DMSO	34	295.38	272.42	2.42
1	8	DMSO	38	254.49	334.72	10.43		2	8	DMSO	38.917	147.23	418.94	2.1		3	8	DMSO	38	303.25	271.85	2.36
1	8	DMSO	42	253.7	330.13	9.32		2	8	DMSO	42.912	150.24	437.25	2.35		3	8	DMSO	42	299.35	277.66	2.04
1	8	DMSO	46	245.39	339.9	9.97		2	8	DMSO	46.913	147.77	417.73	2.33		3	8	DMSO	46	308.25	279.41	2.43
1	8	DMSO	50	255.31	339.56	10.5		2	8	DMSO	50.917	149.11	408.14	1.92		3	8	DMSO	50	293.48	269.3	2.49
1	8	DMSO	54	261.37	341.85	10.37		2	8	DMSO	54.916	150.52	412.64	2.14		3	8	DMSO	54	293.21	270.36	2.36
1	8	DMSO	58	259.27	337.63	9.5		2	8	DMSO	58.915	153.77	415.6	2.66		3	8	DMSO	58	299.83	262.84	2.29
1	8	DMSO	62	256.98	336.35	9.4		2	8	DMSO	62.916	153.96	423.82	2.4		3	8	DMSO	62	316.98	273.44	2.06
1	8	DMSO	66	245.49	327.93	9.55		2	8	DMSO	66.913	162.06	437.87	2.45		3	8	DMSO	66	318.25	274.76	2.23
1	8	DMSO	70	253.05	327.66	9.28		2	8	DMSO	70.916	156.82	424.25	1.64		3	8	DMSO	70	321.66	281.67	2.69
1	8	DMSO	74	260.9	335.46	9.89		2	8	DMSO	74.915	158.71	426.94	2.23		3	8	DMSO	74	326.99	272.36	2.52
1	8	DMSO	78	258.69	342.21	10.09		2	8	DMSO	78.916	157.74	428.89	2.11		3	8	DMSO	78	322.89	269.4	2.24
1	8	DMSO	82	261.73	343.44	9.65		2	8	DMSO	82.916	160.45	440.27	2.19		3	8	DMSO	82	316.78	276.37	2.3
1	8	DMSO	86	262.73	332.8	9.77		2	8	DMSO	86.917	160.14	434.53	2.16		3	8	DMSO	86	319.14	273.85	2.43
1	8	DMSO	90	252.37	345.06	9.45		2	8	DMSO	90.916	163.09	427.57	2.38		3	8	DMSO	90	319.98	269.41	2.36
1	8	DMSO	94	253.28	349.09	9.72		2	8	DMSO	94.916	163.75	431.39	2.43		3	8	DMSO	94	327.99	268.14	2.33
1	8	DMSO	98	251.55	347.39	9.83		2	8	DMSO	98.916	163.79	437.85	2.12		3	8	DMSO	98	323.79	271.73	2.6
1	9	DMSO	0	242.79	152.19	3.41		2	9	DMSO	0	248.05	352.24	2.32		3	9	DMSO	0	453.58	232.64	2.23
1	9	DMSO	4	248	152.05	3.07		2	9	DMSO	4	254.01	363.12	2.01		3	9	DMSO	4	459.36	233.03	2.13
1	9	DMSO	8	243.71	149.09	3.33		2	9	DMSO	7.999	239.83	372.2	2.36		3	9	DMSO	8	457.68	240.62	2.39
1	9	DMSO	10	42.83	148.62	3.19		2	9	DMSO	10.965	82.87	383.17	1.88		3	9	DMSO	10	181.13	221.25	2.2
1	9	DMSO	14	82.98	150.66	3.43		2	9	DMSO	14.905	159.48	384.22	1.75		3	9	DMSO	14	279.08	226.24	2.35
1	9	DMSO	18	99.24	149.35	3.16		2	9	DMSO	18.906	210.06	373.51	2.28		3	9	DMSO	18	313.18	231.63	2.24
1	9	DMSO	22	110.54	146.35	3.29		2	9	DMSO	22.906	224.54	416.9	2.54		3	9	DMSO	22	311.23	226.46	2.4
1	9	DMSO	26	109.75	150.12	3.16		2	9	DMSO	26.906	258.49	429.6	2.05		3	9	DMSO	26	324.03	233.05	2.6
1	9	DMSO	30	102.42	148.49	3.01		2	9	DMSO	30.906	268.46	447.88	2.43		3	9	DMSO	30	331.45	232.79	2.31
1	9	DMSO	34	106.22	150.33	3.47		2	9	DMSO	34.906	263.98	461.57	2.28		3	9	DMSO	34	337.85	231.9	2.52
1	9	DMSO	38	108.22	151.05	3.33		2	9	DMSO	38.906	269.93	449.52	1.91		3	9	DMSO	38	352.49	233.23	2.15
1	9	DMSO	42	113.96	150.9	3.49		2	9	DMSO	42.905	268.46	450.65	1.88		3	9	DMSO	42	350.48	237.99	2.25
1	9	DMSO	46	119.42	150.86	3.11		2	9	DMSO	46.906	281.71	440.87	1.98		3	9	DMSO	46	356.71	236.91	2.52
1	9	DMSO	50	118.36	149.72	3.14		2	9	DMSO	50.904	281.27	453.32	2.13		3	9	DMSO	50	353.26	233.37	2.27
1	9	DMSO	54	110.71	150.3	3.14		2	9	DMSO	54.906	283.23	427.91	1.98		3	9	DMSO	54	352.49	225.84	2.04
1	9	DMSO	58	122.76	150.18	2.95		2	9	DMSO	58.906	293.95	424.56	2.13		3	9	DMSO	58	358.79	232.21	2.24
1	9	DMSO	62	130.81	150.66	2.88		2	9	DMSO	62.906	264.27	439.88	1.81		3	9	DMSO	62	354.64	234.13	2.18
1	9	DMSO	66	127.9	151.48	2.76		2	9	DMSO	66.906	253.46	431.81	1.91		3	9	DMSO	66	356.12	236.65	2.41
1	9	DMSO	70	124.88	149.77	2.9		2	9	DMSO	70.906	247.42	444.81	2.22		3	9	DMSO	70	349.01	237.34	2.46
1	9	DMSO	74	132.91	153.83	3.01		2	9	DMSO	74.906	247.89	438.73	1.94		3	9	DMSO	74	361.07	236.71	2.21
1	9	DMSO	78	136.15	151.23	2.92		2	9	DMSO	78.904	247.01	424.5	1.68		3	9	DMSO	78	355.2	226.32	2.47
1	9	DMSO	82	132.11	151.53	2.64		2	9	DMSO	82.905	254.27	403.7	2.13		3	9	DMSO	82	364.95	226.18	2.35
1	9	DMSO	86	132.93	151.77	2.83		2	9	DMSO	86.906	266.13	383.5	2.13		3	9	DMSO	86	367.79	231.9	2.28
1	9	DMSO	90	126.86	153.43	3.07		2	9	DMSO	90.906	272.77	381.91	2.34		3	9	DMSO	90	373.28	234.12	2.3
1	9	DMSO	94	136.05	154.41	3.19		2	9	DMSO	94.905	257.73	393.08	2.48		3	9	DMSO	94	376.84	234.74	2.32
1	9	DMSO	98	125.38	155.17	2.82		2	9	DMSO	98.906	253.34	387.77	2.08		3	9	DMSO	98	375.95	233.55	2.54
1	10	DMSO	0	433.5	363.35	4.12		2	10	DMSO	0	179.5	232.56	2.08		3	10	DMSO	0	304.44	168.02	47.12
1	10	DMSO	4	438.81	362.54	3.21		2	10	DMSO	4	180.48	234.54	1.97		3	10	DMSO	4	307.41	173.68	48.4
1	10	DMSO	8	441.44	361.44	3.43		2	10	DMSO	8	180.95	236.16	2.6		3	10	DMSO	8	320.16	173.75	48.54
1	10	DMSO	10	59.41	353.43	3.42		2	10	DMSO	10.964	81.96	193.29	2.24		3	10	DMSO	10	119.46	156.93	48.8
1	10	DMSO	14	155.98	355.6	3.19		2	10	DMSO	14.907	115.18	202.39	2.5		3	10	DMSO	14	200.61	157.94	48.48
1	10	DMSO	18	180.24	367.42	3.8		2	10	DMSO	18.907	121.27	207.39	2.28		3	10	DMSO	18	226.46	161.17	49.17
1	10	DMSO	22	186.72	356.89	3.28		2	10	DMSO	22.906	125.65	204.17	1.72		3	10	DMSO	22	227.63	159.26	47.26
1	10	DMSO	26	194.91	361.33	3.41		2	10	DMSO	26.906	128.14	209.89	2.23		3	10	DMSO	26	226.49	165.37	47.72
1	10	DMSO	30	198	347.39	3.49		2	10	DMSO	30.905	131.97	217.26	2.04		3	10	DMSO	30	242.7	169.33	50.6
1	10	DMSO	34	202.99	350.99	3.81		2	10	DMSO	34.905	132.19	218.56	2.48		3	10	DMSO	34	253.25	169.15	52.01
1	10	DMSO	38	203.92	359.71	3.8		2	10	DMSO	38.907	129.76	207.8	2.07		3	10	DMSO	38	252.37	165.74	49.03
1	10	DMSO	42	207.49	358.02	3.63		2	10	DMSO	42.903	127.61	217.09	2.32		3	10	DMSO	42	254.11	168.46	50.95
1	10	DMSO	46	208.81	364.7	3.52		2	10	DMSO	46.907	130.34	221.46	2.26		3	10	DMSO	46	256.63	168.89	53.53
1	10	DMSO	50	210.85	354.78	3.49		2	10	DMSO	50.905	133.35	218.16	2.41		3	10	DMSO	50	254.09	170.87	52.78
1	10	DMSO	54	214.74	330.89	2.97		2	10	DMSO	54.907	132.63	219.23	2.31		3	10	DMSO	54	244.51	171.22	49.73
1	10	DMSO	58	214.29	356.26	3.77		2	10	DMSO	58.906	130.41	223.2	1.95		3	10	DMSO	58	239.62	168.76	51.5
1	10	DMSO	62	212.67	342.78	3.83		2	10	DMSO	62.905	127.84	222.86	2.23		3	10	DMSO	62	251.87	173.68	52.07
1	10	DMSO	66	212.52	338.48	3.79		2	10	DMSO	66.906	130.57	218.89	1.58		3	10	DMSO	66	250.73	167.63	50.01
1	10	DMSO	70	216.53	330.28	3.51		2	10	DMSO	70.906	132.58	224.98	1.98		3	10	DMSO	70	243.61	169.83	52.1
1	10	DMSO	74	215.34	278.81	3.49		2	10	DMSO	74.906	137.31	227.66	2.55		3	10	DMSO	74	252.69	170.43	52.84
1	10	DMSO	78	216.45	282.74	3.63		2	10	DMSO	78.906	138.38	228.22	2.52		3	10	DMSO	78	258.67	169.14	51.19
1	10	DMSO	82	219.56	269.48	3.5		2	10	DMSO	82.907	137.62	225.64	1.83		3	10	DMSO	82	256.7	167.24	50.81
1	10	DMSO	86	217.64	303.7	3.42		2	10	DMSO	86.906	134.89	222.81	2.09		3	10	DMSO	86	258.12	166.38	51.3
1	10	DMSO	90	216.33	287.08	3.46		2	10	DMSO	90.906	136.85	222.62	2.28		3	10	DMSO	90	270.63	170.9	52.99
1	10	DMSO	94	200.23	278.16	4.12		2	10	DMSO	94.907	138.78	223.67	2.23		3	10	DMSO	94	262.27	171.96	50.87
1	10	DMSO	98	172.85	278.88	3.43		2	10	DMSO	98.905	142.07	223.44	2.23		3	10	DMSO	98	267.4	170.74	53.48
1	11	DMSO	0	325.47	177.3	5.05		2	11	DMSO	0	393.33	68.99	21.55		3	11	DMSO	0	328.36	202.49	2.32
1	11	DMSO	4	334.81	160.12	5.26		2	11	DMSO	3.999	391.13	72.62	18.95		3	11	DMSO	4	329.24	205.37	2.38
1	11	DMSO	8	338.39	178.13	5.32		2	11	DMSO	7.998	331.37	73.47	21.9		3	11	DMSO	8	327.46	206.71	2.2
1	11	DMSO	10	45.73	159.74	5.48		2	11	DMSO	10.967	79.92	54.57	19.37		3	11	DMSO	10	110.17	170.34	2.12
1	11	DMSO	14	176	164.35	5.24		2	11	DMSO	14.908	191.59	63.03	21.41		3	11	DMSO	14	195.89	179.66	2.52
1	11	DMSO	18	216.56	171.17	5.21		2	11	DMSO	18.906	241.83	62.26	19.9		3	11	DMSO	18	211.83	182.39	2.17
1	11	DMSO	22	239.72	176.57	5.31		2	11	DMSO	22.908	253.29	61.92	21.47		3	11	DMSO	22	218.32	184.92	2.1
1	11	DMSO	26	255.56	183.99	5.11		2	11	DMSO	26.908	264.29	63.4	21.82		3	11	DMSO	26	225.77	185.16	2.55
1	11	DMSO	30	258.4	197.45	6.19		2	11	DMSO	30.907	283.56	53.2	21.03		3	11	DMSO	30	228.09	183.73	2
1	11	DMSO	34	254.64	159.87	6.01		2	11	DMSO	34.908	282.03	49.11	19.78		3	11	DMSO	34	227.95	182.25	2.15
1	11	DMSO	38	266.11	187.77	4.8		2	11	DMSO	38.906	284.86	48.76	19.14		3	11	DMSO	38	231.73	168.18	2.42
1	11	DMSO	42	263.49	176.41	5.45		2	11	DMSO	42.907	269.68	49.9	19.65		3	11	DMSO	42	236.53	177.12	2.48
1	11	DMSO	46	269.32	193.96	5.28		2	11	DMSO	46.907	267.15	49.19	18.84		3	11	DMSO	46	241.06	177.68	2.88
1	11	DMSO	50	272.36	177.01	5.27		2	11	DMSO	50.907	277.93	48.78	18.87		3	11	DMSO	50	238.28	185.79	2.19
1	11	DMSO	54	276.64	171.79	4.88		2	11	DMSO	54.908	257.03	48.11	20.06		3	11	DMSO	54	234.14	184.93	1.91
1	11	DMSO	58	280.5	182.85	4.83		2	11	DMSO	58.907	274.68	48.53	21.48		3	11	DMSO	58	233.07	184.38	2.22
1	11	DMSO	62	281.8	179.93	5.19		2	11	DMSO	62.906	264.02	48.13	21.99		3	11	DMSO	62	232.78	186.32	2.03
1	11	DMSO	66	278.32	200.17	4.47		2	11	DMSO	66.908	277.89	48.55	19.32		3	11	DMSO	66	235.17	182.73	2.25
1	11	DMSO	70	284.66	179.75	4.81		2	11	DMSO	70.907	260.09	48.97	17.87		3	11	DMSO	70	235.49	183.02	2.05
1	11	DMSO	74	283.76	176.01	5.16		2	11	DMSO	74.907	256.21	53.5	17.98		3	11	DMSO	74	241.58	187.41	2.35
1	11	DMSO	78	289.18	173.85	5.09		2	11	DMSO	78.904	260.17	53.22	19.62		3	11	DMSO	78	239.42	185.63	2.29
1	11	DMSO	82	285.32	175.14	5.21		2	11	DMSO	82.907	229.13	50.8	21.22		3	11	DMSO	82	242.49	180.71	2.3
1	11	DMSO	86	287.56	195.65	4.58		2	11	DMSO	86.908	220.83	49.36	21.5		3	11	DMSO	86	238.64	186.62	2.75
1	11	DMSO	90	288.14	171.93	4.97		2	11	DMSO	90.907	222.17	50.57	21.04		3	11	DMSO	90	238.93	186.35	2.13
1	11	DMSO	94	291.7	183.97	5.41		2	11	DMSO	94.908	264.91	53.99	19.2		3	11	DMSO	94	237.51	188.89	2.27
1	11	DMSO	98	285.93	175.77	5.03		2	11	DMSO	98.905	284.67	53.62	19.1		3	11	DMSO	98	234.54	182.68	2.36
1	12	DMSO	0	529.71	279.28	4.06		2	12	DMSO	0	452.18	64.67	2.27		3	12	DMSO	0	263.14	241.75	3.29
1	12	DMSO	4	528.89	275.1	4.1		2	12	DMSO	4	443.77	65.94	1.89		3	12	DMSO	4	263.62	243.03	2.99
1	12	DMSO	8	527.78	279.05	4.62		2	12	DMSO	7.998	455.75	65.97	2.35		3	12	DMSO	8	263.62	238.07	3.17
1	12	DMSO	10	46.17	275.41	4.47		2	12	DMSO	10.962	72.47	59.8	2.35		3	12	DMSO	10	79.9	233.21	2.78
1	12	DMSO	14	211.42	275.45	4.52		2	12	DMSO	14.903	205.21	58.93	2.14		3	12	DMSO	14	158.43	231.14	3.47
1	12	DMSO	18	263.69	269.49	4.36		2	12	DMSO	18.902	289.99	57.63	2.27		3	12	DMSO	18	177.68	229	3.41
1	12	DMSO	22	290.57	265.84	4.24		2	12	DMSO	22.903	335.91	60.18	2.85		3	12	DMSO	22	193.13	227.83	3.2
1	12	DMSO	26	311.4	265.58	4.06		2	12	DMSO	26.902	360.97	59.76	2.04		3	12	DMSO	26	197.85	229.13	3.14
1	12	DMSO	30	324.51	273.5	4.29		2	12	DMSO	30.902	404.62	59.26	2.62		3	12	DMSO	30	197.03	219.74	3.52
1	12	DMSO	34	332.31	264.59	4.43		2	12	DMSO	34.9	423.97	61	2.21		3	12	DMSO	34	203.9	218.16	3.01
1	12	DMSO	38	337.34	265.01	4.47		2	12	DMSO	38.9	431.27	62.09	2.43		3	12	DMSO	38	203.65	216.01	2.86
1	12	DMSO	42	338.41	266.84	4.49		2	12	DMSO	42.901	444.38	64.12	2.16		3	12	DMSO	42	204.98	216.46	3.27
1	12	DMSO	46	347.16	266.37	4.28		2	12	DMSO	46.898	451.88	64.58	2.55		3	12	DMSO	46	207.97	216.26	2.97
1	12	DMSO	50	345.24	263.21	4.29		2	12	DMSO	50.902	449.95	61.78	2.33		3	12	DMSO	50	216.49	226.84	3.25
1	12	DMSO	54	344.92	263.61	4.11		2	12	DMSO	54.902	463.75	61.39	2.27		3	12	DMSO	54	216.43	215.08	2.79
1	12	DMSO	58	346.45	264.83	4.58		2	12	DMSO	58.902	472.03	63.34	2.1		3	12	DMSO	58	211.78	216.15	3
1	12	DMSO	62	348.32	266.56	4.22		2	12	DMSO	62.901	490.54	65	2.4		3	12	DMSO	62	210.09	208.75	2.66
1	12	DMSO	66	357.56	268.1	4.75		2	12	DMSO	66.902	489.21	64.85	2.19		3	12	DMSO	66	216.22	217.14	3.08
1	12	DMSO	70	354.24	267.52	4.53		2	12	DMSO	70.901	481.11	65.31	2.09		3	12	DMSO	70	203.98	212.39	3.08
1	12	DMSO	74	358.27	270.61	4.05		2	12	DMSO	74.902	514.8	66.17	2.23		3	12	DMSO	74	209.91	216.59	2.75
1	12	DMSO	78	361.55	265.75	4.26		2	12	DMSO	78.902	487.07	65.94	2.17		3	12	DMSO	78	218.57	222.84	3.4
1	12	DMSO	82	359.13	269.86	4.45		2	12	DMSO	82.902	485	67.72	2.22		3	12	DMSO	82	218.45	215.01	3.2
1	12	DMSO	86	351.24	271.8	4.16		2	12	DMSO	86.901	518.5	67.88	2.26		3	12	DMSO	86	216.04	205.79	3.11
1	12	DMSO	90	359.36	273.55	4.28		2	12	DMSO	90.902	491.35	67.89	2.47		3	12	DMSO	90	221.04	199.69	3.41
1	12	DMSO	94	361.38	268.37	5.12		2	12	DMSO	94.902	492.62	67.56	2.31		3	12	DMSO	94	227.91	217.97	3.2
1	12	DMSO	98	358.3	272.38	3.97		2	12	DMSO	98.902	501.29	66.45	2.05		3	12	DMSO	98	227.4	220.46	2.94
1	13	DMSO	0	181.91	135.95	4.24		2	1	50 nM	0	839.85	1289.45	2.21		3	1	50 nM	0	558.37	318.94	13.32
1	13	DMSO	4	183.98	137.57	4.58		2	1	50 nM	4	832.62	1316.78	2.41		3	1	50 nM	4	553.43	296.04	12.67
1	13	DMSO	8	185.57	136.06	4.18		2	1	50 nM	8	842.55	1329.97	1.99		3	1	50 nM	8	550.58	297.25	13.93
1	13	DMSO	10	25.47	128.28	4.05		2	1	50 nM	10	50.85	1323.48	2.03		3	1	50 nM	10	125.14	283.09	11.99
1	13	DMSO	14	74.09	130.61	4.56		2	1	50 nM	14	209.5	1324.99	2.53		3	1	50 nM	14	202.53	266.66	13.18
1	13	DMSO	18	83.23	136.46	4.41		2	1	50 nM	18	274.08	1350.19	1.96		3	1	50 nM	18	217.11	308.85	11.48
1	13	DMSO	22	87.15	135.29	4.35		2	1	50 nM	22	310.19	1379.55	2.05		3	1	50 nM	22	220.89	310.4	11.52
1	13	DMSO	26	89.58	133.74	4.31		2	1	50 nM	26	335.37	1307.36	2.58		3	1	50 nM	26	227.89	291.27	12.19
1	13	DMSO	30	89.16	134.99	3.95		2	1	50 nM	30	350.56	1279.75	2.17		3	1	50 nM	30	227.41	286.23	12.04
1	13	DMSO	34	97.58	123.41	4.01		2	1	50 nM	34	358.2	1272.23	2.41		3	1	50 nM	34	231.04	291.07	12.15
1	13	DMSO	38	95.84	126.78	4.47		2	1	50 nM	38	364.82	1356.79	2.38		3	1	50 nM	38	225.44	313.89	12.38
1	13	DMSO	42	96.38	126.74	4.31		2	1	50 nM	42	364.44	1346.97	2.33		3	1	50 nM	42	225.28	333.66	11.95
1	13	DMSO	46	94.35	124.85	4.74		2	1	50 nM	46	365.29	1332.93	2.49		3	1	50 nM	46	222.52	312.8	12.09
1	13	DMSO	50	94.4	116.7	4.05		2	1	50 nM	50	365.62	1370.15	2.08		3	1	50 nM	50	232.86	307.49	11.91
1	13	DMSO	54	93.59	112.98	4.29		2	1	50 nM	54	369.79	1328.32	2.5		3	1	50 nM	54	231.54	332.28	12.62
1	13	DMSO	58	95.1	119.49	3.9		2	1	50 nM	58	373.89	1312.19	2.54		3	1	50 nM	58	229.45	349.19	12.17
1	13	DMSO	62	92.19	117.84	3.92		2	1	50 nM	62	374.87	1293.82	2.21		3	1	50 nM	62	224.08	371.72	12.38
1	13	DMSO	66	92.29	117.35	4.4		2	1	50 nM	66	372.52	1246.2	2.46		3	1	50 nM	66	241.16	318	14.16
1	13	DMSO	70	95.85	113.32	4.1		2	1	50 nM	70	368.98	1307.29	2.21		3	1	50 nM	70	236.78	324.63	13.58
1	13	DMSO	74	96.97	121.34	4.44		2	1	50 nM	74	372.14	1300.36	2.4		3	1	50 nM	74	249.49	317.46	14.15
1	13	DMSO	78	98.29	126.97	4.67		2	1	50 nM	78	384.46	1261.41	2.46		3	1	50 nM	78	254.92	304.93	14.32
1	13	DMSO	82	98.97	124.21	4.65		2	1	50 nM	82	380.23	1209.79	2.26		3	1	50 nM	82	236.58	328.37	12.73
1	13	DMSO	86	98.78	120.76	4.4		2	1	50 nM	86	369.34	1349.15	2.17		3	1	50 nM	86	226.82	341.54	12.56
1	13	DMSO	90	99.99	120.5	4.02		2	1	50 nM	90	372.18	1276.42	2.35		3	1	50 nM	90	241.13	331.76	13.17
1	13	DMSO	94	100.39	116.25	4.24		2	1	50 nM	94	371.45	1305.87	2.57		3	1	50 nM	94	235.43	325.16	12.52
1	13	DMSO	98	100.44	116.61	4.27		2	1	50 nM	98	358	1318.01	2.32		3	1	50 nM	98	238.65	324.91	12.23
1	14	DMSO	0	269.17	245.75	4.27		2	2	50 nM	0	295.61	202.36	2.07		3	2	50 nM	0	346.35	292.54	2.11
1	14	DMSO	4	270	244.88	4.2		2	2	50 nM	4.003	322.73	206.7	2.18		3	2	50 nM	4	353.14	292.11	2.21
1	14	DMSO	8	275.24	243.16	4.25		2	2	50 nM	8.003	331.47	204.85	2.32		3	2	50 nM	8	352.69	295.88	2.32
1	14	DMSO	10	39.7	236.5	4.16		2	2	50 nM	9.989	48.67	198.27	1.85		3	2	50 nM	10	85.1	225.2	2.3
1	14	DMSO	14	117.92	240.52	4.55		2	2	50 nM	13.929	131.02	194.14	2.2		3	2	50 nM	14	170.26	256.84	2.46
1	14	DMSO	18	132.65	240.22	4.44		2	2	50 nM	17.926	159.27	195.44	2.53		3	2	50 nM	18	190.59	267.14	2.56
1	14	DMSO	22	138.33	236.71	4.47		2	2	50 nM	21.928	168.45	189.07	2.48		3	2	50 nM	22	197.71	270.84	2.21
1	14	DMSO	26	145.32	236.83	4.45		2	2	50 nM	25.929	169.83	185.06	2		3	2	50 nM	26	200.76	275.07	2.45
1	14	DMSO	30	145.99	237.58	4.23		2	2	50 nM	29.929	172.04	183.4	2.32		3	2	50 nM	30	209.22	276.91	2.35
1	14	DMSO	34	152.98	234.8	4.24		2	2	50 nM	33.928	171.77	184.13	2.69		3	2	50 nM	34	205.19	280.78	2.4
1	14	DMSO	38	156.23	236.31	4.43		2	2	50 nM	37.928	171.75	189.11	2.17		3	2	50 nM	38	206.25	279.98	2.25
1	14	DMSO	42	162.57	237.38	4.43		2	2	50 nM	41.927	166.94	189.69	2.06		3	2	50 nM	42	205.77	278.67	2.2
1	14	DMSO	46	153.88	235.5	4.06		2	2	50 nM	45.924	169.92	190.86	2.45		3	2	50 nM	46	212.78	282.6	2.15
1	14	DMSO	50	148.81	238.98	3.77		2	2	50 nM	49.923	156.32	191.1	2.33		3	2	50 nM	50	211.09	276.46	2.27
1	14	DMSO	54	159.64	239.09	4		2	2	50 nM	53.929	169.07	190.39	2.35		3	2	50 nM	54	214.19	280.36	2.2
1	14	DMSO	58	163.93	241.13	4.77		2	2	50 nM	57.927	177.95	191.43	2.34		3	2	50 nM	58	215.61	287.07	2.41
1	14	DMSO	62	165.42	241.74	4.7		2	2	50 nM	61.928	164.44	192.82	2.06		3	2	50 nM	62	215.03	287.93	2.28
1	14	DMSO	66	173.37	243.65	4.21		2	2	50 nM	65.929	165.26	191.33	2.62		3	2	50 nM	66	209.29	282.45	2.27
1	14	DMSO	70	168.63	245.18	4.56		2	2	50 nM	69.929	173.85	195.34	2.43		3	2	50 nM	70	212.16	284.65	2.52
1	14	DMSO	74	169.47	248.23	4.34		2	2	50 nM	73.928	172.84	199.68	2.7		3	2	50 nM	74	211.32	283.99	2.11
1	14	DMSO	78	175.78	246.01	4.51		2	2	50 nM	77.928	163.23	198.69	2.57		3	2	50 nM	78	208.91	281.41	2.47
1	14	DMSO	82	175.46	245.59	4.32		2	2	50 nM	81.925	162.58	204.22	2.28		3	2	50 nM	82	213.66	280.87	2.47
1	14	DMSO	86	179.33	246.88	4.43		2	2	50 nM	85.928	161.13	203.52	2.3		3	2	50 nM	86	215.21	281.76	2.04
1	14	DMSO	90	175.99	242.97	4.32		2	2	50 nM	89.928	159.78	206.08	2.37		3	2	50 nM	90	215.51	282.81	2.35
1	14	DMSO	94	182.64	245.04	4.84		2	2	50 nM	93.927	162.52	207.35	2.79		3	2	50 nM	94	206.38	286.54	2.52
1	14	DMSO	98	185.71	243.79	4.32		2	2	50 nM	97.923	149.66	203.51	2.23		3	2	50 nM	98	210.94	283.21	2.4
1	15	DMSO	0	224.64	295.87	4.6		2	3	50 nM	0	166.19	75.78	2.65		3	3	50 nM	0	351.9	247.12	2.56
1	15	DMSO	4	230.52	286.21	5.09		2	3	50 nM	4.001	167.89	75.96	2.72		3	3	50 nM	4	363.84	212.98	2.21
1	15	DMSO	8	233.1	279.61	4.94		2	3	50 nM	8.003	168.68	76.39	2.51		3	3	50 nM	8	363.24	247.98	2.59
1	15	DMSO	10	33.79	276.18	4.67		2	3	50 nM	9.964	31.34	71.2	2.9		3	3	50 nM	10	150.27	210.39	2.2
1	15	DMSO	14	146.3	279.39	4.33		2	3	50 nM	13.904	62.59	71.38	2.78		3	3	50 nM	14	192.05	240	1.97
1	15	DMSO	18	180.25	281.25	5.03		2	3	50 nM	17.904	70.48	72.85	2.36		3	3	50 nM	18	203.45	238.89	2.33
1	15	DMSO	22	202.02	283.06	4.33		2	3	50 nM	21.904	73.67	75.41	3.12		3	3	50 nM	22	211.55	240.65	2.19
1	15	DMSO	26	212.26	286.27	4.69		2	3	50 nM	25.899	74.74	79.38	2.7		3	3	50 nM	26	213.83	278.26	2.33
1	15	DMSO	30	223.56	283.5	4.62		2	3	50 nM	29.899	71.27	74.02	2.75		3	3	50 nM	30	214.23	275.54	2.18
1	15	DMSO	34	224.97	284.21	4.61		2	3	50 nM	33.904	76.85	83.26	2.82		3	3	50 nM	34	214.7	286.11	2.11
1	15	DMSO	38	232.12	287.01	4.84		2	3	50 nM	37.904	78.77	80.69	2.91		3	3	50 nM	38	215.65	280.86	2.35
1	15	DMSO	42	239.36	277.35	3.94		2	3	50 nM	41.9	75.59	78.5	2.41		3	3	50 nM	42	217.94	276.89	2.21
1	15	DMSO	46	240.39	283.6	4.73		2	3	50 nM	45.904	75.09	84.08	2.68		3	3	50 nM	46	219.36	260.19	2.27
1	15	DMSO	50	241.36	283.42	5.02		2	3	50 nM	49.904	80.77	79.91	2.98		3	3	50 nM	50	216.87	269.6	2.18
1	15	DMSO	54	244.12	283.44	4.54		2	3	50 nM	53.904	80.27	87.67	2.39		3	3	50 nM	54	219.68	276.95	2.26
1	15	DMSO	58	242.36	285.09	4.97		2	3	50 nM	57.902	77.01	88.48	2.86		3	3	50 nM	58	219.59	274.03	2.05
1	15	DMSO	62	246.04	286.23	4.56		2	3	50 nM	61.904	71.1	85.41	2.73		3	3	50 nM	62	222.55	277.76	2.73
1	15	DMSO	66	247.23	291.28	4.82		2	3	50 nM	65.904	78.99	87.38	2.99		3	3	50 nM	66	217.51	275.01	2.3
1	15	DMSO	70	250.64	283.7	4.59		2	3	50 nM	69.902	79.39	85.59	2.45		3	3	50 nM	70	218.2	287.22	2.65
1	15	DMSO	74	248.17	275.72	4.91		2	3	50 nM	73.904	77.92	80.66	3.52		3	3	50 nM	74	222.25	283.93	2.64
1	15	DMSO	78	247.43	271.19	5.06		2	3	50 nM	77.905	79.54	88.87	2.37		3	3	50 nM	78	220.98	291.83	2.51
1	15	DMSO	82	251.59	281.18	4.53		2	3	50 nM	81.904	76.88	85.98	2.11		3	3	50 nM	82	219.25	288.86	2.48
1	15	DMSO	86	255.31	277.97	4.98		2	3	50 nM	85.9	79.5	83.05	2.48		3	3	50 nM	86	217.71	290.73	2.37
1	15	DMSO	90	254.44	288.28	4.6		2	3	50 nM	89.904	85.52	87.56	2.47		3	3	50 nM	90	213.49	294.18	2.57
1	15	DMSO	94	257.79	289.7	4.89		2	3	50 nM	93.904	83.05	77.94	2.42		3	3	50 nM	94	216.12	294.39	1.97
1	15	DMSO	98	250.54	287.63	4.79		2	3	50 nM	97.902	84.38	72.83	2.38		3	3	50 nM	98	213.82	289.41	2.27
1	1	50 nM	0	242.31	303.96	4.02		2	4	50 nM	0	888.09	592.31	2.58		3	4	50 nM	0	2311.16	2373.01	1.87
1	1	50 nM	4	255.16	304.09	4.57		2	4	50 nM	4.003	889.07	606.33	2.04		3	4	50 nM	4	2319.77	2379.96	2.05
1	1	50 nM	8	258.37	304.4	4.46		2	4	50 nM	8.003	927.27	606.08	2.33		3	4	50 nM	8	2313.38	2377.95	2.07
1	1	50 nM	10	21.11	294.65	4.25		2	4	50 nM	9.968	43.04	587.82	2.31		3	4	50 nM	10	352.7	2310.01	2.31
1	1	50 nM	14	87.24	301.63	4.28		2	4	50 nM	13.905	167.21	577.5	2.54		3	4	50 nM	14	458.74	2342.16	2.63
1	1	50 nM	18	110.66	301.14	4.2		2	4	50 nM	17.907	213.91	593.19	2.26		3	4	50 nM	18	512.95	2335.25	2.02
1	1	50 nM	22	122.59	301.68	4.85		2	4	50 nM	21.908	226.88	572.38	1.8		3	4	50 nM	22	546.22	2323.39	2.25
1	1	50 nM	26	129.26	298.8	4.59		2	4	50 nM	25.908	242.45	606.35	2.68		3	4	50 nM	26	551.6	2321.71	1.91
1	1	50 nM	30	128.77	296.45	4.35		2	4	50 nM	29.909	248.22	587.78	2.57		3	4	50 nM	30	575.57	2315.14	2.35
1	1	50 nM	34	131.12	296.44	4.55		2	4	50 nM	33.908	252.73	589.76	1.98		3	4	50 nM	34	576.83	2312.46	2.16
1	1	50 nM	38	133.61	295.17	3.96		2	4	50 nM	37.908	256.75	591.97	2.41		3	4	50 nM	38	590.12	2298.5	2.23
1	1	50 nM	42	141.88	296.76	4.35		2	4	50 nM	41.908	264.22	596.63	2.48		3	4	50 nM	42	593.82	2299.45	2.39
1	1	50 nM	46	144.87	292.08	4.11		2	4	50 nM	45.908	262.54	604.39	2.59		3	4	50 nM	46	595.43	2295.76	2.5
1	1	50 nM	50	146.09	296.21	4.32		2	4	50 nM	49.908	260.24	606.56	2.67		3	4	50 nM	50	601.28	2295.51	2.4
1	1	50 nM	54	147.32	298.62	4.41		2	4	50 nM	53.908	270.71	618.23	2		3	4	50 nM	54	603.78	2294.66	2.12
1	1	50 nM	58	147.73	297.46	4.45		2	4	50 nM	57.907	276.76	616.83	2.56		3	4	50 nM	58	607.8	2280.91	2.75
1	1	50 nM	62	150.28	288.77	5		2	4	50 nM	61.907	274.83	609.82	2.37		3	4	50 nM	62	625.31	2275.7	2.32
1	1	50 nM	66	147.35	297.08	4.2		2	4	50 nM	65.908	278.4	605.8	2.66		3	4	50 nM	66	634.01	2283.63	2.78
1	1	50 nM	70	147.28	298.67	4.55		2	4	50 nM	69.908	275.13	584.8	2.52		3	4	50 nM	70	628.06	2283.9	2.81
1	1	50 nM	74	148.99	294.78	4.45		2	4	50 nM	73.904	281.13	589.56	2.25		3	4	50 nM	74	637.62	2279.5	2.43
1	1	50 nM	78	147.51	297.65	4.42		2	4	50 nM	77.906	282.1	584.53	2.01		3	4	50 nM	78	626.84	2275.17	1.97
1	1	50 nM	82	150.66	297.22	4.36		2	4	50 nM	81.908	278.03	564.52	2.19		3	4	50 nM	82	618.3	2278.6	2.13
1	1	50 nM	86	155.47	296.23	4		2	4	50 nM	85.908	267.08	539.74	2.52		3	4	50 nM	86	623.59	2266.13	2.34
1	1	50 nM	90	156.83	298.49	4.37		2	4	50 nM	89.908	275.78	558.9	2.51		3	4	50 nM	90	624.81	2267.6	2.3
1	1	50 nM	94	153.58	297.52	4.36		2	4	50 nM	93.908	280.52	537.61	2.22		3	4	50 nM	94	619.46	2275.37	2.51
1	1	50 nM	98	155.3	304.47	4.28		2	4	50 nM	97.908	282.37	587.8	2.2		3	4	50 nM	98	621.34	2259.67	2.47
1	2	50 nM	0	758.08	614.1	6.97		2	5	50 nM	0	670.31	848.92	2.29		3	5	50 nM	0	1058.55	1153.75	2.52
1	2	50 nM	4	771.33	585.83	6.39		2	5	50 nM	4.003	660.97	818.68	2.05		3	5	50 nM	4	1073.81	1159.36	2.54
1	2	50 nM	8	762.46	593.21	6.4		2	5	50 nM	8.003	656.64	844.67	2.43		3	5	50 nM	8	1068.34	1163.08	2.64
1	2	50 nM	10	38.2	585.4	6.59		2	5	50 nM	10.015	57.45	779.72	2.22		3	5	50 nM	10	151.19	1076.47	2.58
1	2	50 nM	14	199.82	598.61	6.22		2	5	50 nM	13.953	171.62	768.16	2.44		3	5	50 nM	14	303.92	1084.55	2.9
1	2	50 nM	18	280.31	607.57	6.86		2	5	50 nM	17.953	204.92	814.72	2.42		3	5	50 nM	18	343.87	1131.35	2.61
1	2	50 nM	22	318.4	609.9	6.03		2	5	50 nM	21.952	213.74	758.14	1.95		3	5	50 nM	22	362.42	1146.68	2.98
1	2	50 nM	26	347.98	603.04	7.36		2	5	50 nM	25.952	216.06	746.58	2.11		3	5	50 nM	26	370.79	1152.25	2.72
1	2	50 nM	30	366.86	605.69	6.45		2	5	50 nM	29.953	219.42	786.98	2.74		3	5	50 nM	30	374.14	1123.42	2.45
1	2	50 nM	34	379.81	601.25	6.18		2	5	50 nM	33.952	217.6	832.64	2.46		3	5	50 nM	34	373.83	1146.12	2.82
1	2	50 nM	38	391.02	601.76	6.83		2	5	50 nM	37.952	220.8	815.96	2.52		3	5	50 nM	38	388.78	1157.79	2.81
1	2	50 nM	42	409.32	571.28	7.05		2	5	50 nM	41.952	217.89	826.84	2.68		3	5	50 nM	42	391.63	1154.02	2.62
1	2	50 nM	46	405.12	532.92	6.75		2	5	50 nM	45.952	214.62	840.94	2.76		3	5	50 nM	46	388.12	1153.98	2.56
1	2	50 nM	50	431.09	513.67	7.09		2	5	50 nM	49.952	215.02	828.21	2.16		3	5	50 nM	50	386.43	1115.03	2.95
1	2	50 nM	54	433.1	523.35	6.76		2	5	50 nM	53.952	214.79	766.72	2.37		3	5	50 nM	54	385.15	1001	2.66
1	2	50 nM	58	439.36	523.47	6.92		2	5	50 nM	57.953	215.42	743.01	2.28		3	5	50 nM	58	387.38	983.24	2.63
1	2	50 nM	62	437.62	530.62	6.97		2	5	50 nM	61.952	221.36	729.87	2.25		3	5	50 nM	62	393.23	993.96	2.71
1	2	50 nM	66	438.23	531.35	6.33		2	5	50 nM	65.952	216.92	799.9	2.16		3	5	50 nM	66	371.37	1008.18	2.36
1	2	50 nM	70	434.34	513.53	6.5		2	5	50 nM	69.953	211.38	743.69	2.31		3	5	50 nM	70	375.54	1137.44	2.45
1	2	50 nM	74	452.43	542.52	6.61		2	5	50 nM	73.952	216.41	761.41	2.42		3	5	50 nM	74	384.31	1165.73	2.47
1	2	50 nM	78	444.3	535.34	6.31		2	5	50 nM	77.952	210	792.8	2.42		3	5	50 nM	78	386.54	972.01	2.76
1	2	50 nM	82	439.58	505.36	7.04		2	5	50 nM	81.952	216.63	732.49	2.59		3	5	50 nM	82	383.87	1160.76	2.64
1	2	50 nM	86	427.52	494.58	6.52		2	5	50 nM	85.953	221.94	702.99	2.71		3	5	50 nM	86	364.7	1173.22	2.74
1	2	50 nM	90	425.38	487.59	6.61		2	5	50 nM	89.952	220.82	838.68	2.33		3	5	50 nM	90	398.76	1169.51	2.68
1	2	50 nM	94	442.08	506.78	6.44		2	5	50 nM	93.952	221.11	804.83	2.37		3	5	50 nM	94	388.06	1166.71	2.57
1	2	50 nM	98	448.91	523.14	5.98		2	5	50 nM	97.949	222.76	805.36	1.94		3	5	50 nM	98	407.17	1165.04	2.82
1	3	50 nM	0	343.56	326.41	4.38		2	6	50 nM	0	377.23	276.66	2.84		3	6	50 nM	0	1423.21	1629.56	2.32
1	3	50 nM	4	344.24	325.48	4.45		2	6	50 nM	4.003	377.46	288.55	2.06		3	6	50 nM	4	1429.26	1611.96	2.75
1	3	50 nM	8	343.5	322.62	4.87		2	6	50 nM	7.999	362.47	280.03	2.73		3	6	50 nM	8	1412.7	1634.31	2.34
1	3	50 nM	10	25	304.72	4.67		2	6	50 nM	9.985	43.3	265.02	2.29		3	6	50 nM	10	254.46	1285	2.57
1	3	50 nM	14	83.5	312.24	4.2		2	6	50 nM	13.924	131.85	270.15	2.51		3	6	50 nM	14	500.77	1334.66	2.53
1	3	50 nM	18	94.73	312.43	4.71		2	6	50 nM	17.924	160.2	270.56	2.3		3	6	50 nM	18	580.86	1342.82	2.5
1	3	50 nM	22	101.49	319.45	4.56		2	6	50 nM	21.925	166.87	267.55	2.26		3	6	50 nM	22	627.04	1399.82	2.06
1	3	50 nM	26	104.37	314.45	4.84		2	6	50 nM	25.922	172.83	254.26	2.39		3	6	50 nM	26	654.01	1367.12	2.72
1	3	50 nM	30	108.29	319.24	4.87		2	6	50 nM	29.925	173.85	245.76	2.15		3	6	50 nM	30	694.42	1413.66	2.56
1	3	50 nM	34	107.83	314.63	4.3		2	6	50 nM	33.925	181.52	260.67	2.36		3	6	50 nM	34	722.09	1413	2.41
1	3	50 nM	38	108.01	315.41	5.12		2	6	50 nM	37.924	193.45	278.28	2.34		3	6	50 nM	38	758.6	1458.2	2.29
1	3	50 nM	42	107.25	312.4	4.17		2	6	50 nM	41.924	186.56	263.71	2.03		3	6	50 nM	42	759.39	1458.28	2.33
1	3	50 nM	46	106.53	311.51	4.55		2	6	50 nM	45.925	188.19	270.27	2.1		3	6	50 nM	46	756.35	1429.73	2.34
1	3	50 nM	50	108.64	308.99	4.66		2	6	50 nM	49.924	196.08	284.1	2.11		3	6	50 nM	50	792.14	1476.85	2.28
1	3	50 nM	54	107.47	302.23	4.23		2	6	50 nM	53.924	190.92	262.53	2.24		3	6	50 nM	54	801.81	1482.53	2.42
1	3	50 nM	58	108.15	303.62	4.38		2	6	50 nM	57.925	194.37	260.76	2.39		3	6	50 nM	58	791.52	1475.28	2.44
1	3	50 nM	62	108.7	306.86	4.45		2	6	50 nM	61.924	198.65	264.31	2.62		3	6	50 nM	62	817.15	1492.25	2.3
1	3	50 nM	66	109.59	301.59	4.61		2	6	50 nM	65.924	197.61	253.02	2.33		3	6	50 nM	66	818	1482.34	2.58
1	3	50 nM	70	108.47	302.45	4.56		2	6	50 nM	69.925	191.82	232.68	2.68		3	6	50 nM	70	815.29	1439.48	2.69
1	3	50 nM	74	109.02	298.95	3.91		2	6	50 nM	73.925	196.72	233.56	2.47		3	6	50 nM	74	812.06	1409.99	2.58
1	3	50 nM	78	112.22	314.44	4.01		2	6	50 nM	77.924	191.38	225.82	2.32		3	6	50 nM	78	814.73	1403.79	2.53
1	3	50 nM	82	114.27	316.55	4.81		2	6	50 nM	81.924	191.32	239.32	2.37		3	6	50 nM	82	813.23	1386.83	3.05
1	3	50 nM	86	112.12	306.82	4.08		2	6	50 nM	85.923	186.73	221.43	2.31		3	6	50 nM	86	821.6	1442.55	2.96
1	3	50 nM	90	113.11	308.66	4.71		2	6	50 nM	89.925	186.96	223.14	2.03		3	6	50 nM	90	819.42	1352.9	2.8
1	3	50 nM	94	112.04	309.16	4.25		2	6	50 nM	93.924	185.52	220.46	2.13		3	6	50 nM	94	830.85	1420.58	2.25
1	3	50 nM	98	112.68	299.73	4.35		2	6	50 nM	97.925	189.02	220.11	2.33		3	6	50 nM	98	830.45	1391.79	2.33
1	4	50 nM	0	1047.21	1638.98	4.52		2	7	50 nM	0	153	149.53	2.64		3	7	50 nM	0	2503.48	2194.99	2.49
1	4	50 nM	4	1059.07	1633.44	4.06		2	7	50 nM	4.001	145.05	150.32	2.35		3	7	50 nM	4	2391.21	2141.8	2.27
1	4	50 nM	8	1064.03	1639.87	3.95		2	7	50 nM	8.003	147.33	153.08	2.26		3	7	50 nM	8	2312.71	2143.7	2.38
1	4	50 nM	10	34.61	1621.57	4.32		2	7	50 nM	9.972	19.37	154.29	2.29		3	7	50 nM	10	439.45	1734.66	2.5
1	4	50 nM	14	186.24	1654.43	4.35		2	7	50 nM	13.912	45.78	153.7	2.42		3	7	50 nM	14	569.36	1887.4	1.94
1	4	50 nM	18	249.21	1653.94	4.2		2	7	50 nM	17.912	53.17	157.86	1.77		3	7	50 nM	18	651.5	1779.62	2.4
1	4	50 nM	22	281.12	1637.17	4.26		2	7	50 nM	21.912	55.13	154.21	2.43		3	7	50 nM	22	644.72	1866.31	2.34
1	4	50 nM	26	302.83	1630.78	4.41		2	7	50 nM	25.912	54.84	151.07	2.33		3	7	50 nM	26	624.9	1903.23	2.8
1	4	50 nM	30	314.17	1617.87	4.4		2	7	50 nM	29.912	56.07	148.26	2.39		3	7	50 nM	30	621.19	1906.28	2.57
1	4	50 nM	34	324.64	1620.72	4.31		2	7	50 nM	33.911	54.28	141.2	2.09		3	7	50 nM	34	600.2	1897.93	2.67
1	4	50 nM	38	336.76	1620.73	3.92		2	7	50 nM	37.912	56.77	145.46	2.63		3	7	50 nM	38	586.77	1882.27	2.51
1	4	50 nM	42	344.54	1613.41	4.01		2	7	50 nM	41.912	54.75	138.33	2.42		3	7	50 nM	42	619.13	1786.58	2.63
1	4	50 nM	46	346.71	1605.4	4.8		2	7	50 nM	45.91	56.32	137.62	2.57		3	7	50 nM	46	626.81	1814.08	2.16
1	4	50 nM	50	339.14	1598.76	4.38		2	7	50 nM	49.912	54.61	141.01	2.15		3	7	50 nM	50	613.37	1797.82	2.17
1	4	50 nM	54	355.52	1597.7	4.17		2	7	50 nM	53.912	54.68	140.08	2.21		3	7	50 nM	54	614.06	1793.98	2.47
1	4	50 nM	58	356.08	1602.85	4.56		2	7	50 nM	57.912	54.87	141.73	2.05		3	7	50 nM	58	617.57	1761.87	2.53
1	4	50 nM	62	364.09	1604.53	4.39		2	7	50 nM	61.912	56.67	141.19	2.77		3	7	50 nM	62	598.43	1812.7	2.06
1	4	50 nM	66	362.95	1597.91	4.3		2	7	50 nM	65.912	56.88	145.11	1.86		3	7	50 nM	66	627.2	1704.23	2.17
1	4	50 nM	70	367.5	1610.43	3.8		2	7	50 nM	69.912	57.4	137.55	2.56		3	7	50 nM	70	626.77	1713.75	2.31
1	4	50 nM	74	372.07	1614.29	4		2	7	50 nM	73.911	58.86	142.19	2.26		3	7	50 nM	74	615.65	1727	2.08
1	4	50 nM	78	375.32	1617.4	4.02		2	7	50 nM	77.912	59.56	142.84	2.24		3	7	50 nM	78	618.85	1666.83	2.16
1	4	50 nM	82	369.44	1607.73	4.42		2	7	50 nM	81.912	58.82	133.64	2.55		3	7	50 nM	82	632.05	1597.51	2.45
1	4	50 nM	86	362.23	1624.49	4.71		2	7	50 nM	85.912	58.64	135.56	2.49		3	7	50 nM	86	647.28	1576.03	2.36
1	4	50 nM	90	362.27	1613.15	4.37		2	7	50 nM	89.912	59.13	135.12	2.31		3	7	50 nM	90	637.78	1541.47	2.2
1	4	50 nM	94	369.29	1606.19	4.51		2	7	50 nM	93.908	60.78	136.83	2.67		3	7	50 nM	94	648.57	1544.9	2.39
1	4	50 nM	98	384.76	1619.23	4.35		2	7	50 nM	97.911	59.04	133.18	2.33		3	7	50 nM	98	640.63	1556.81	2.71
1	5	50 nM	0	937.74	1242.46	5.34		2	8	50 nM	0	260.03	215.64	2.23		3	8	50 nM	0	913.92	448.74	13.99
1	5	50 nM	4	950.73	1241.33	5.44		2	8	50 nM	4.004	262.01	220.98	2.44		3	8	50 nM	4	909.06	445.55	13.44
1	5	50 nM	8	926.29	1286.6	5.56		2	8	50 nM	8.003	274.78	229.75	2.21		3	8	50 nM	8	902.07	417.63	12.93
1	5	50 nM	10	21.85	1288.98	5.16		2	8	50 nM	9.971	23.04	214.33	3.04		3	8	50 nM	10	213.58	427.94	13.04
1	5	50 nM	14	145.85	1341.39	5.4		2	8	50 nM	13.91	82.4	206.72	2.35		3	8	50 nM	14	376.52	413.71	13.06
1	5	50 nM	18	189.76	1317.44	6.32		2	8	50 nM	17.909	107.1	207.25	2.41		3	8	50 nM	18	430.26	417.44	13.92
1	5	50 nM	22	203.84	1348.27	5.51		2	8	50 nM	21.91	124.74	202.72	2.12		3	8	50 nM	22	435.36	394.02	12.72
1	5	50 nM	26	216.55	1343.23	5.89		2	8	50 nM	25.907	130.23	204.16	2.19		3	8	50 nM	26	459.16	401.74	12.45
1	5	50 nM	30	220.91	1347.89	5.43		2	8	50 nM	29.91	133.16	212.99	2.31		3	8	50 nM	30	478.5	410.48	12.99
1	5	50 nM	34	233.04	1346.01	5.86		2	8	50 nM	33.909	141	221.58	2.48		3	8	50 nM	34	472.53	408.08	13.05
1	5	50 nM	38	240.9	1287.04	5.3		2	8	50 nM	37.911	145.9	220.97	2.27		3	8	50 nM	38	466.25	393.93	11.76
1	5	50 nM	42	238.72	1284.08	5.57		2	8	50 nM	41.91	155.05	218.66	2.13		3	8	50 nM	42	480.17	425.89	12.68
1	5	50 nM	46	240.68	1304.34	5.78		2	8	50 nM	45.91	160.08	219.06	2.48		3	8	50 nM	46	469.35	402.04	12.53
1	5	50 nM	50	241.3	1301.18	5.31		2	8	50 nM	49.911	156.43	219.58	2.46		3	8	50 nM	50	459.87	397.63	11.89
1	5	50 nM	54	241.13	1291.63	5.84		2	8	50 nM	53.907	157.94	210.21	2.31		3	8	50 nM	54	454.96	385.11	12.54
1	5	50 nM	58	246.13	1326.85	4.94		2	8	50 nM	57.911	163.19	209.65	2.25		3	8	50 nM	58	445.65	376.13	11.24
1	5	50 nM	62	249.73	1289.85	5.61		2	8	50 nM	61.909	166.4	200.38	2.31		3	8	50 nM	62	448.65	381.78	12.23
1	5	50 nM	66	244.65	1300.88	4.92		2	8	50 nM	65.911	164.62	202.77	2.62		3	8	50 nM	66	447.13	389.97	11.36
1	5	50 nM	70	243.32	1282.49	4.98		2	8	50 nM	69.91	166.88	215.43	2.51		3	8	50 nM	70	446.53	384.14	12.14
1	5	50 nM	74	247.75	1237.29	5.19		2	8	50 nM	73.911	169.02	219.97	1.94		3	8	50 nM	74	447.16	397.7	12.37
1	5	50 nM	78	246.23	1210.29	6.16		2	8	50 nM	77.911	165.86	214.36	2.8		3	8	50 nM	78	447.66	388.16	11.22
1	5	50 nM	82	240.5	1217.38	5.21		2	8	50 nM	81.91	169.06	220.37	2.11		3	8	50 nM	82	457.21	405.37	12.1
1	5	50 nM	86	235.5	1217.28	5.78		2	8	50 nM	85.911	169.95	209.92	2.43		3	8	50 nM	86	465.53	431.57	12.17
1	5	50 nM	90	238.46	1186.8	5.26		2	8	50 nM	89.911	165.41	214	2.62		3	8	50 nM	90	470.74	439.29	12.59
1	5	50 nM	94	245.27	1166.76	5.69		2	8	50 nM	93.907	162.81	210.98	2.55		3	8	50 nM	94	506.81	450.58	13.68
1	5	50 nM	98	240.24	1173.37	5.74		2	8	50 nM	97.907	160.2	219.92	2.09		3	8	50 nM	98	497.95	427.71	12.89
1	6	50 nM	0	1575.88	1335.05	4.12		2	9	50 nM	0	923.2	1228.33	5.38		3	9	50 nM	0	522.43	209.59	2.19
1	6	50 nM	4	1586.19	1260.87	3.99		2	9	50 nM	4.005	935.59	1221.91	5.43		3	9	50 nM	4	541.35	212.69	2.73
1	6	50 nM	8	1511.75	1230.46	3.93		2	9	50 nM	8.002	926.48	1200.31	5.72		3	9	50 nM	8	532.83	212.52	2.17
1	6	50 nM	10	33.06	1204.07	4.14		2	9	50 nM	9.97	57.39	1188.74	5.06		3	9	50 nM	10	106.6	201.09	2.19
1	6	50 nM	14	175.9	1222.08	4.35		2	9	50 nM	13.91	152.6	1230.76	5.47		3	9	50 nM	14	232.57	195.98	2.12
1	6	50 nM	18	232.62	1199.79	4.4		2	9	50 nM	17.911	187.39	1232.09	6.44		3	9	50 nM	18	283.73	186.92	2.21
1	6	50 nM	22	272.77	1191.2	4.31		2	9	50 nM	21.911	202.79	1249.31	5.85		3	9	50 nM	22	313.9	185.79	2.24
1	6	50 nM	26	286.57	1155.84	4.26		2	9	50 nM	25.911	212.4	1230.39	5.5		3	9	50 nM	26	334.63	194.99	2.23
1	6	50 nM	30	320.66	1238.5	4.61		2	9	50 nM	29.911	216.55	1268.49	5.26		3	9	50 nM	30	339.6	201.62	2.69
1	6	50 nM	34	315.73	1162.56	4.42		2	9	50 nM	33.909	213.33	1278.85	5.53		3	9	50 nM	34	364.34	200.92	2.43
1	6	50 nM	38	343.33	1304.06	4.2		2	9	50 nM	37.911	233.89	1241.71	5.68		3	9	50 nM	38	360.94	204.08	2.11
1	6	50 nM	42	346.07	1197.48	4.16		2	9	50 nM	41.911	232.63	1240.23	5.66		3	9	50 nM	42	365.81	200.24	2.49
1	6	50 nM	46	355.48	1210.56	4.73		2	9	50 nM	45.911	237.09	1264.61	5.43		3	9	50 nM	46	352.31	199.29	2.38
1	6	50 nM	50	363.07	1189.73	4.14		2	9	50 nM	49.911	240.83	1237.72	5.64		3	9	50 nM	50	341.52	195.61	2.56
1	6	50 nM	54	361.16	1186.33	4.85		2	9	50 nM	53.91	236.77	1222.29	5.19		3	9	50 nM	54	355.8	199.02	2.38
1	6	50 nM	58	368.92	1223.69	3.92		2	9	50 nM	57.909	245.72	1231.37	5.69		3	9	50 nM	58	373.59	196.53	2.32
1	6	50 nM	62	373.35	1222.45	4.86		2	9	50 nM	61.911	256.97	1174.31	5.32		3	9	50 nM	62	379.79	201.47	2.57
1	6	50 nM	66	375.36	1208.13	4.4		2	9	50 nM	65.911	262.43	1176.65	5.27		3	9	50 nM	66	376.46	195.67	2.18
1	6	50 nM	70	374.03	1144.24	4.1		2	9	50 nM	69.911	261.29	1177.55	5.47		3	9	50 nM	70	375.23	199.1	2.24
1	6	50 nM	74	369.27	1136.38	4.34		2	9	50 nM	73.911	256.77	1176.56	6.28		3	9	50 nM	74	359.35	201.56	2.3
1	6	50 nM	78	354.14	1078.94	4.53		2	9	50 nM	77.91	265.94	1145.47	5.47		3	9	50 nM	78	376.81	196.11	2.26
1	6	50 nM	82	372.77	1135.7	4.4		2	9	50 nM	81.911	260.22	1171.38	5.79		3	9	50 nM	82	369.37	202.98	2.48
1	6	50 nM	86	373.72	1105.63	4.28		2	9	50 nM	85.911	258.86	1162.4	5.44		3	9	50 nM	86	369.94	202.01	2.47
1	6	50 nM	90	378.64	1097.29	4.31		2	9	50 nM	89.911	261.56	1164.01	5.66		3	9	50 nM	90	326.24	200.16	2.32
1	6	50 nM	94	367.25	1097.18	4.66		2	9	50 nM	93.911	264.05	1139.52	5.53		3	9	50 nM	94	365.92	199.17	2.4
1	6	50 nM	98	366.32	1100.61	4.47		2	9	50 nM	97.911	259.66	1136.83	5.73		3	9	50 nM	98	416.25	202.71	2.24
1	7	50 nM	0	202.49	186.78	6.36		2	10	50 nM	0	367.33	243.44	4.51		3	10	50 nM	0	822.75	210.52	2.3
1	7	50 nM	4	202.31	177.39	6.91		2	10	50 nM	3.999	373.94	246.08	3.57		3	10	50 nM	4	811.64	202.64	2.51
1	7	50 nM	8	205.02	188	6.38		2	10	50 nM	7.999	375.2	244.77	4.55		3	10	50 nM	8	856.51	207.96	2.65
1	7	50 nM	10	19.3	183.8	6.87		2	10	50 nM	9.966	53.03	239.95	4.13		3	10	50 nM	10	134.56	182.86	2.28
1	7	50 nM	14	80.99	183.88	6.32		2	10	50 nM	13.905	114.89	240.75	4.4		3	10	50 nM	14	286.93	184.72	2.58
1	7	50 nM	18	98.86	186.63	6.3		2	10	50 nM	17.904	127.61	208.85	4.17		3	10	50 nM	18	336.4	184.3	2.13
1	7	50 nM	22	98.6	178.82	6.07		2	10	50 nM	21.906	131.59	245.29	4.38		3	10	50 nM	22	360.46	185.18	2.26
1	7	50 nM	26	104.65	177.35	6.94		2	10	50 nM	25.907	132.95	240.17	3.93		3	10	50 nM	26	389.13	185.94	2.38
1	7	50 nM	30	110.38	182.38	7.06		2	10	50 nM	29.904	133.95	227.48	4.64		3	10	50 nM	30	396.6	184.92	2.29
1	7	50 nM	34	112.86	183.98	5.98		2	10	50 nM	33.906	136.21	245.62	4.03		3	10	50 nM	34	394.8	186.39	2.15
1	7	50 nM	38	107.74	181.12	6.71		2	10	50 nM	37.906	136.8	246.15	4.37		3	10	50 nM	38	404.76	192.64	2.05
1	7	50 nM	42	109.76	187.93	6.77		2	10	50 nM	41.907	137.75	243.41	4.25		3	10	50 nM	42	412.77	187.15	2.35
1	7	50 nM	46	109.26	175.04	6.51		2	10	50 nM	45.906	139.28	246.73	4.97		3	10	50 nM	46	404.89	191.24	2.56
1	7	50 nM	50	111.07	169.24	6.16		2	10	50 nM	49.902	139.99	246.35	4.26		3	10	50 nM	50	411.74	183.78	2.43
1	7	50 nM	54	110.55	171.54	6.92		2	10	50 nM	53.905	139.45	254.14	4.23		3	10	50 nM	54	406.51	181.24	2.32
1	7	50 nM	58	108.58	173.71	6.66		2	10	50 nM	57.902	140.66	245.09	4.23		3	10	50 nM	58	412.99	192.3	2.45
1	7	50 nM	62	117.16	172.4	6.46		2	10	50 nM	61.902	139.92	250.05	3.73		3	10	50 nM	62	435.89	186.76	2.31
1	7	50 nM	66	119.22	166.71	6.79		2	10	50 nM	65.905	140.3	246.43	4.5		3	10	50 nM	66	439.41	189.6	2.36
1	7	50 nM	70	121.02	165.41	7.01		2	10	50 nM	69.907	142.21	245.53	3.89		3	10	50 nM	70	428.08	193.31	2.36
1	7	50 nM	74	115.48	159.15	6.74		2	10	50 nM	73.906	143.24	252.82	4.84		3	10	50 nM	74	414.15	191.31	2.31
1	7	50 nM	78	106.98	165.16	6.26		2	10	50 nM	77.906	144.17	246.97	4.14		3	10	50 nM	78	435.13	191.17	2.31
1	7	50 nM	82	105.95	163.11	6.19		2	10	50 nM	81.907	143.56	250.52	3.99		3	10	50 nM	82	433.88	194.95	2.56
1	7	50 nM	86	103.38	158.04	6.35		2	10	50 nM	85.906	146.13	238.59	4.17		3	10	50 nM	86	465.43	185.37	2.2
1	7	50 nM	90	101.42	159.22	6.12		2	10	50 nM	89.906	146.72	247.5	3.89		3	10	50 nM	90	471	187.81	2.34
1	7	50 nM	94	105.53	166.44	6.45		2	10	50 nM	93.907	145.69	252.05	4.26		3	10	50 nM	94	470.78	188.56	2
1	7	50 nM	98	107.56	168.87	6.38		2	10	50 nM	97.904	145.95	249.84	3.77		3	10	50 nM	98	469.13	186.75	2.73
1	8	50 nM	0	462.52	427.2	4.61		2	11	50 nM	0	412.1	257.18	2.25		3	11	50 nM	0	615.56	841.12	2.14
1	8	50 nM	4	486.21	421.26	4.59		2	11	50 nM	3.998	410.35	256.05	2.21		3	11	50 nM	4	717.33	804.25	2.47
1	8	50 nM	8	482.04	457.02	4.83		2	11	50 nM	8	400.97	253.21	2.17		3	11	50 nM	8	723.3	833.62	2.21
1	8	50 nM	10	26.73	431.58	4.26		2	11	50 nM	10.03	41.66	249.42	2.44		3	11	50 nM	10	193.13	794.76	2.3
1	8	50 nM	14	122.98	434.11	4.5		2	11	50 nM	13.97	147.23	250.71	2.35		3	11	50 nM	14	329.32	789.26	2.21
1	8	50 nM	18	150.37	400.71	4.4		2	11	50 nM	17.968	179.99	248.84	2.09		3	11	50 nM	18	387.75	822.69	2.29
1	8	50 nM	22	155.64	359.91	4.97		2	11	50 nM	21.969	188.78	242.81	2.22		3	11	50 nM	22	415.53	814.7	2.02
1	8	50 nM	26	159.43	359.29	4.6		2	11	50 nM	25.97	195.65	246.52	2.31		3	11	50 nM	26	414.93	844.79	2.4
1	8	50 nM	30	158.02	342.7	4.46		2	11	50 nM	29.97	206.58	252.16	2.49		3	11	50 nM	30	451.28	792.1	2.39
1	8	50 nM	34	159.26	336.54	4.36		2	11	50 nM	33.97	206.02	247.27	2.62		3	11	50 nM	34	467.18	771.58	2.26
1	8	50 nM	38	163.65	349.06	4.86		2	11	50 nM	37.969	207.77	245.62	2.3		3	11	50 nM	38	461.39	808.37	2.12
1	8	50 nM	42	166.16	330.4	4.2		2	11	50 nM	41.97	210.87	246.78	2.63		3	11	50 nM	42	494.23	803.59	2.16
1	8	50 nM	46	169.82	347.14	4.21		2	11	50 nM	45.968	214.69	251.62	2.41		3	11	50 nM	46	503.57	834.19	2.36
1	8	50 nM	50	170.26	334.31	4.33		2	11	50 nM	49.97	218.12	246.13	2.44		3	11	50 nM	50	551.34	802.76	2.35
1	8	50 nM	54	170.92	309.51	4.43		2	11	50 nM	53.97	225.66	246.43	2.54		3	11	50 nM	54	551.91	831.04	2.39
1	8	50 nM	58	173.58	360.23	4.35		2	11	50 nM	57.97	222.95	245.51	2.27		3	11	50 nM	58	561.68	808.67	2.24
1	8	50 nM	62	170.91	356.49	4.31		2	11	50 nM	61.969	220.18	243.9	2.51		3	11	50 nM	62	565.02	825.81	2.61
1	8	50 nM	66	174.78	363.93	4.5		2	11	50 nM	65.97	224.9	245.62	2.36		3	11	50 nM	66	544.75	850.28	2.62
1	8	50 nM	70	177.76	349.33	4.63		2	11	50 nM	69.968	226.59	238.08	2.5		3	11	50 nM	70	551.94	858.38	2.3
1	8	50 nM	74	175.38	374.33	4.58		2	11	50 nM	73.968	222.78	242.71	2.29		3	11	50 nM	74	548.75	823.02	2.28
1	8	50 nM	78	161.94	382	4.31		2	11	50 nM	77.97	232.32	230.38	2.26		3	11	50 nM	78	566.69	814.06	2.79
1	8	50 nM	82	161.05	340.94	4.59		2	11	50 nM	81.966	233.45	238.76	2.19		3	11	50 nM	82	577.01	818.16	2.43
1	8	50 nM	86	169.49	314.45	4.19		2	11	50 nM	85.969	231.64	237.55	2.13		3	11	50 nM	86	590.42	827.75	2.25
1	8	50 nM	90	171.22	344.2	4.38		2	11	50 nM	89.968	232.09	231.8	2.19		3	11	50 nM	90	590.59	795.02	2.56
1	8	50 nM	94	172.95	341.79	4.85		2	11	50 nM	93.97	234.83	231.12	2.46		3	11	50 nM	94	576.48	790.05	2.26
1	8	50 nM	98	163.52	304.15	4.07		2	11	50 nM	97.97	237.12	218.77	2.69		3	11	50 nM	98	580.26	819.4	2.17
1	9	50 nM	0	679.18	1151.22	4.89		2	12	50 nM	0	326.26	515.75	2.65		3	1	125 nM	0	1113.7	846.97	3.72
1	9	50 nM	4	677.28	1137.41	4.64		2	12	50 nM	4	315.41	525.33	2.33		3	1	125 nM	4	1126.36	818.07	3.67
1	9	50 nM	8	662.28	1145.16	5.2		2	12	50 nM	7.998	327.41	510.7	2.35		3	1	125 nM	8	1139.97	824.46	3.6
1	9	50 nM	10	34.52	1070.8	5.23		2	12	50 nM	9.964	36.25	492.34	2.43		3	1	125 nM	10	224.49	769.45	3.8
1	9	50 nM	14	138.3	1092.69	4.74		2	12	50 nM	13.904	116.62	499.33	2.65		3	1	125 nM	14	354.66	781.42	3.89
1	9	50 nM	18	170.4	1071.71	4.66		2	12	50 nM	17.904	148.1	495.85	2.69		3	1	125 nM	18	408.62	765.35	3.67
1	9	50 nM	22	186.83	1092.26	5.02		2	12	50 nM	21.904	154.14	490.15	2.18		3	1	125 nM	22	441.09	757.32	3.93
1	9	50 nM	26	188.29	1075.31	4.67		2	12	50 nM	25.905	163.42	491.09	2.65		3	1	125 nM	26	455.04	746.75	3.58
1	9	50 nM	30	189.69	1067.07	4.65		2	12	50 nM	29.905	162.44	493.26	2.03		3	1	125 nM	30	467.23	696.36	3.72
1	9	50 nM	34	197.9	1077.75	5.19		2	12	50 nM	33.904	168.05	489.11	2.35		3	1	125 nM	34	468.35	749.24	3.28
1	9	50 nM	38	200.52	1113.81	4.42		2	12	50 nM	37.904	164.55	492.45	2.29		3	1	125 nM	38	468.76	747.11	3.67
1	9	50 nM	42	206.45	1148.29	4.78		2	12	50 nM	41.904	164.63	495.39	2.41		3	1	125 nM	42	461.5	721.84	3.77
1	9	50 nM	46	209.63	1110.52	4.69		2	12	50 nM	45.902	172.07	497.29	2.59		3	1	125 nM	46	486.91	732.36	3.75
1	9	50 nM	50	215.65	1146.15	4.88		2	12	50 nM	49.905	172.97	496.76	2.45		3	1	125 nM	50	494.64	755.11	4.49
1	9	50 nM	54	219.61	1130.74	5.21		2	12	50 nM	53.904	174.22	491.93	2.24		3	1	125 nM	54	497.53	757.64	3.8
1	9	50 nM	58	228.61	1105.16	5		2	12	50 nM	57.904	178.7	485.67	2.4		3	1	125 nM	58	473.74	702.94	3.73
1	9	50 nM	62	229.75	1092.97	5.36		2	12	50 nM	61.904	177.53	498.56	2.35		3	1	125 nM	62	484.53	737.54	3.88
1	9	50 nM	66	229.37	1104.32	4.92		2	12	50 nM	65.904	180.71	494.65	2.37		3	1	125 nM	66	486.51	712.67	3.87
1	9	50 nM	70	228.13	1094.59	5.09		2	12	50 nM	69.899	182.44	504.53	2.39		3	1	125 nM	70	480.18	687.51	3.74
1	9	50 nM	74	228.28	1114.83	5.48		2	12	50 nM	73.899	179.53	501.74	2.54		3	1	125 nM	74	485.49	715.85	4.29
1	9	50 nM	78	221.1	1134.2	5.05		2	12	50 nM	77.9	179.39	513.12	2.39		3	1	125 nM	78	501.05	698.69	3.82
1	9	50 nM	82	221.69	1106.15	5.41		2	12	50 nM	81.904	178.35	517.02	2.24		3	1	125 nM	82	479.76	690.98	4.57
1	9	50 nM	86	223.14	1128.52	5.24		2	12	50 nM	85.904	183.08	517.94	2.25		3	1	125 nM	86	485.33	713.15	4.29
1	9	50 nM	90	214.8	1108.91	5.22		2	12	50 nM	89.9	186.23	505.39	2.09		3	1	125 nM	90	489.17	732.07	4.05
1	9	50 nM	94	217.34	1086.16	5.33		2	12	50 nM	93.904	185.74	509.95	2.47		3	1	125 nM	94	493.27	757.42	3.35
1	9	50 nM	98	223.1	1094.57	5.73		2	12	50 nM	97.9	180.96	524.65	2.68		3	1	125 nM	98	501.12	747.83	4.25
1	10	50 nM	0	1101.81	863.2	3.72		2	13	50 nM	0	596.89	701.4	2.1		3	2	125 nM	0	758.73	611.94	2.43
1	10	50 nM	4	1134.64	854.98	4.66		2	13	50 nM	4	600.65	712.75	2.55		3	2	125 nM	4	744.27	640.03	2.46
1	10	50 nM	8	1139.72	856.16	4.36		2	13	50 nM	8	601.71	711.9	2.03		3	2	125 nM	8	725.58	632.56	2.2
1	10	50 nM	10	36.58	809.5	4.53		2	13	50 nM	9.966	57.3	647.3	2.41		3	2	125 nM	10	137.3	597.38	2.28
1	10	50 nM	14	151.41	834.41	4.41		2	13	50 nM	13.907	147.73	673.36	2.42		3	2	125 nM	14	278.2	617.35	2.55
1	10	50 nM	18	191.7	838.09	4.66		2	13	50 nM	17.907	169.12	674.42	2.73		3	2	125 nM	18	322.04	637.7	2.19
1	10	50 nM	22	210.84	834.2	4.06		2	13	50 nM	21.907	176.84	678.99	2.19		3	2	125 nM	22	352.31	647.33	2.12
1	10	50 nM	26	217.64	839.03	4.35		2	13	50 nM	25.907	178.15	681.6	1.99		3	2	125 nM	26	372.19	600.7	2.28
1	10	50 nM	30	222.84	843.18	3.86		2	13	50 nM	29.907	179.09	679.95	2.53		3	2	125 nM	30	382.79	600.54	2.31
1	10	50 nM	34	229.1	845.82	4.18		2	13	50 nM	33.907	176.51	675.17	2.09		3	2	125 nM	34	370.44	608.7	2.46
1	10	50 nM	38	223.38	860.79	4.38		2	13	50 nM	37.905	178.39	666.25	2.13		3	2	125 nM	38	384.18	579.34	2.34
1	10	50 nM	42	234.76	848.88	4.41		2	13	50 nM	41.906	177.25	666.77	2.41		3	2	125 nM	42	393.13	578.27	2.15
1	10	50 nM	46	239.17	852.42	4.64		2	13	50 nM	45.907	180	660.81	2.49		3	2	125 nM	46	391.99	613.43	1.96
1	10	50 nM	50	240.03	845.04	4.4		2	13	50 nM	49.903	180.61	659.08	2.24		3	2	125 nM	50	405.12	603.07	2.33
1	10	50 nM	54	236.07	861.26	4.9		2	13	50 nM	53.907	176.71	656.34	2.17		3	2	125 nM	54	365.44	598.48	2.24
1	10	50 nM	58	238.22	847.58	4.57		2	13	50 nM	57.907	178.93	652.42	2.49		3	2	125 nM	58	400.27	562.02	2.56
1	10	50 nM	62	236.61	859.46	4.53		2	13	50 nM	61.907	176.48	651.41	2.22		3	2	125 nM	62	395.87	579.47	2.14
1	10	50 nM	66	236.56	846.19	4.33		2	13	50 nM	65.905	173.3	644.75	2.18		3	2	125 nM	66	403.81	569.18	2.36
1	10	50 nM	70	240.46	850	4.48		2	13	50 nM	69.908	174.77	640.61	2.58		3	2	125 nM	70	403.67	626.29	2.32
1	10	50 nM	74	237.94	858.28	4.66		2	13	50 nM	73.907	177.79	648.64	2.63		3	2	125 nM	74	402.98	610.61	2.45
1	10	50 nM	78	242.83	844.54	4.48		2	13	50 nM	77.905	171.85	646.1	2.36		3	2	125 nM	78	393.09	662.54	2.14
1	10	50 nM	82	234.62	853.71	4.4		2	13	50 nM	81.903	174.6	614.55	2.5		3	2	125 nM	82	380.36	675.42	1.94
1	10	50 nM	86	237.76	852.94	4.5		2	13	50 nM	85.907	173.44	638.26	2.15		3	2	125 nM	86	382.82	662.03	2.65
1	10	50 nM	90	243.8	835.99	4.55		2	13	50 nM	89.905	171.62	624.84	2.26		3	2	125 nM	90	359.64	624.61	2.13
1	10	50 nM	94	245.32	834.8	3.96		2	13	50 nM	93.903	173.56	631.45	2.36		3	2	125 nM	94	393.34	596.03	2.15
1	10	50 nM	98	247.55	834.56	4.45		2	13	50 nM	97.908	173.65	618.49	2.23		3	2	125 nM	98	381.84	593.05	2.2
1	11	50 nM	0	1288.54	922.05	4.71		2	1	125 nM	0	372.45	544.59	2.06		3	3	125 nM	0	556.79	741.51	4.11
1	11	50 nM	4	1280.53	893.97	5.31		2	1	125 nM	3.999	374.01	541.05	2.48		3	3	125 nM	4	563.69	743.27	3.74
1	11	50 nM	8	1275.46	916.17	4.17		2	1	125 nM	7.999	374.37	547.44	2.11		3	3	125 nM	8	557.24	744.46	3.71
1	11	50 nM	10	40.19	852.99	4.42		2	1	125 nM	9.965	47.58	513.36	2.46		3	3	125 nM	10	103.35	716.97	3.74
1	11	50 nM	14	232.46	841.69	4.83		2	1	125 nM	13.905	122.38	505.95	2.45		3	3	125 nM	14	182.87	720.76	3.1
1	11	50 nM	18	321.72	854.38	4.18		2	1	125 nM	17.903	138.73	560.41	2.17		3	3	125 nM	18	210.97	718.86	3.48
1	11	50 nM	22	375.26	820.41	4.36		2	1	125 nM	21.905	141.24	583.74	2.11		3	3	125 nM	22	220.36	711.56	3.62
1	11	50 nM	26	399.02	848.8	4.55		2	1	125 nM	25.906	138.47	569.41	2.49		3	3	125 nM	26	228.29	707.3	3.21
1	11	50 nM	30	414.08	881.57	4.3		2	1	125 nM	29.905	141.28	567.64	2.5		3	3	125 nM	30	226.03	706.14	3.39
1	11	50 nM	34	444.55	877.88	4.07		2	1	125 nM	33.905	137.41	547.81	2.58		3	3	125 nM	34	234.04	703.38	3.23
1	11	50 nM	38	436.4	872.9	4.41		2	1	125 nM	37.905	134.72	559.1	2.4		3	3	125 nM	38	230.64	696.84	3
1	11	50 nM	42	448.01	838.33	4.09		2	1	125 nM	41.902	135.27	585.24	2.43		3	3	125 nM	42	240.79	703.52	3.45
1	11	50 nM	46	452.71	853.27	4.41		2	1	125 nM	45.905	127.3	566.3	2.11		3	3	125 nM	46	233.2	698.58	2.7
1	11	50 nM	50	458.27	854.39	4.49		2	1	125 nM	49.905	132.37	570.97	2.32		3	3	125 nM	50	233.18	699.68	2.99
1	11	50 nM	54	461.94	868.03	4.79		2	1	125 nM	53.906	129.93	579.85	2.25		3	3	125 nM	54	241.41	704.68	3.07
1	11	50 nM	58	460.67	852.48	4.28		2	1	125 nM	57.904	132.95	572.02	2.24		3	3	125 nM	58	234.57	706.89	3.16
1	11	50 nM	62	456.85	841.48	4.29		2	1	125 nM	61.905	132.29	594.35	2.54		3	3	125 nM	62	245.63	704.51	3.08
1	11	50 nM	66	459.82	817.85	3.87		2	1	125 nM	65.905	130.44	611.77	2.33		3	3	125 nM	66	252.82	703.58	2.88
1	11	50 nM	70	457.37	843.55	4.5		2	1	125 nM	69.906	128.8	612.59	2.08		3	3	125 nM	70	243.9	701.88	2.8
1	11	50 nM	74	458.82	846.97	4.59		2	1	125 nM	73.905	135	614.64	2.43		3	3	125 nM	74	230.49	697.88	2.97
1	11	50 nM	78	456.86	933.8	4.07		2	1	125 nM	77.905	126.88	628.96	2.14		3	3	125 nM	78	240.91	702.6	2.63
1	11	50 nM	82	455.05	920.6	4.91		2	1	125 nM	81.905	121.65	613.66	2.69		3	3	125 nM	82	233.79	698.31	2.63
1	11	50 nM	86	468.75	755.66	4.29		2	1	125 nM	85.905	127.96	614.14	2.04		3	3	125 nM	86	233.75	699.37	2.58
1	11	50 nM	90	472.79	850.16	4.81		2	1	125 nM	89.905	130.72	611.2	2.36		3	3	125 nM	90	220.83	696.61	2.74
1	11	50 nM	94	471.96	833.08	4.59		2	1	125 nM	93.903	138.23	591.5	2.32		3	3	125 nM	94	221.84	695.37	2.65
1	11	50 nM	98	458.13	875.43	4.71		2	1	125 nM	97.905	138.32	551.42	2.41		3	3	125 nM	98	216.26	692.22	2.72
1	12	50 nM	0	661.52	679.1	6.23		2	2	125 nM	0	662.47	1332.67	2.54		3	4	125 nM	0	1303.15	1784.16	2.69
1	12	50 nM	4	678.36	668.52	6.6		2	2	125 nM	3.998	663.29	1351.09	2.69		3	4	125 nM	4	1286.92	1801.53	1.96
1	12	50 nM	8	683.48	653.32	6.18		2	2	125 nM	7.996	679.32	1300.56	1.79		3	4	125 nM	8	1298.38	1786	2.32
1	12	50 nM	10	33.46	639.72	7.26		2	2	125 nM	9.961	34.73	1309.81	2.88		3	4	125 nM	10	373.75	1682.33	2.07
1	12	50 nM	14	137.25	674.62	6.14		2	2	125 nM	13.901	84.89	1340.58	2.4		3	4	125 nM	14	501.38	1722.97	2.41
1	12	50 nM	18	169.66	673.37	5.96		2	2	125 nM	17.901	101.14	1297.85	2.42		3	4	125 nM	18	509.27	1736.5	2.12
1	12	50 nM	22	188.8	667.79	7.05		2	2	125 nM	21.901	108.85	1314.48	2.45		3	4	125 nM	22	514.53	1742.66	2.14
1	12	50 nM	26	193.1	701.04	6.93		2	2	125 nM	25.9	109.84	1348.09	2.39		3	4	125 nM	26	531.44	1749.79	1.95
1	12	50 nM	30	200.41	695.5	7.44		2	2	125 nM	29.901	112.87	1356.12	3.16		3	4	125 nM	30	546.67	1760.16	2.61
1	12	50 nM	34	213.84	712.54	7.25		2	2	125 nM	33.901	112.91	1347.22	2.88		3	4	125 nM	34	544.59	1747.62	2.29
1	12	50 nM	38	225.92	741.76	7.94		2	2	125 nM	37.902	112.94	1382.59	2.7		3	4	125 nM	38	537.76	1744.71	2.89
1	12	50 nM	42	212.27	759.06	8.18		2	2	125 nM	41.901	113.92	1395.39	2.78		3	4	125 nM	42	534.67	1746.85	2.63
1	12	50 nM	46	216.98	737.97	7.22		2	2	125 nM	45.901	115.33	1377.15	3.02		3	4	125 nM	46	543.96	1747.29	2.49
1	12	50 nM	50	215.72	720.93	8.19		2	2	125 nM	49.9	114.98	1381.94	2.7		3	4	125 nM	50	539.48	1746.22	2.38
1	12	50 nM	54	218.08	711.19	8.14		2	2	125 nM	53.901	117.45	1358.44	3.01		3	4	125 nM	54	537.24	1737.11	1.62
1	12	50 nM	58	210.25	703.13	8.26		2	2	125 nM	57.901	116.63	1350.35	2.03		3	4	125 nM	58	561.7	1738.45	2.22
1	12	50 nM	62	231.08	704.07	8.26		2	2	125 nM	61.901	117.92	1352.09	2.29		3	4	125 nM	62	561.61	1715.97	2.6
1	12	50 nM	66	216.92	676.85	8.33		2	2	125 nM	65.902	118.12	1334.48	2.03		3	4	125 nM	66	542.31	1720.94	2.16
1	12	50 nM	70	230.2	645.28	7.76		2	2	125 nM	69.899	115.84	1367.55	2.4		3	4	125 nM	70	535.96	1722.62	2.43
1	12	50 nM	74	237.37	645.13	8.96		2	2	125 nM	73.902	116.82	1349.45	2.57		3	4	125 nM	74	547.86	1710.34	2.37
1	12	50 nM	78	235.36	663.11	7.96		2	2	125 nM	77.901	110.39	1378.26	2.18		3	4	125 nM	78	546.51	1729.63	2.61
1	12	50 nM	82	244.01	619.75	9.06		2	2	125 nM	81.899	106.01	1407.05	2.18		3	4	125 nM	82	552.54	1733.83	2.5
1	12	50 nM	86	238.6	602.22	8.83		2	2	125 nM	85.899	109.21	1361.72	2.28		3	4	125 nM	86	541.27	1711.41	2.2
1	12	50 nM	90	227.52	614.58	8.71		2	2	125 nM	89.901	105.63	1362.96	2.26		3	4	125 nM	90	559.8	1718.14	2.08
1	12	50 nM	94	241.85	591.49	8.84		2	2	125 nM	93.902	107.04	1348.91	2.69		3	4	125 nM	94	565.88	1735.4	2.8
1	12	50 nM	98	246.06	610.66	8.84		2	2	125 nM	97.901	106.77	1335.68	1.97		3	4	125 nM	98	557.16	1720.03	2.35
1	13	50 nM	0	450.14	801.43	4.68		2	3	125 nM	0	767.35	835.95	2.43		3	5	125 nM	0	869.69	1280.97	3.34
1	13	50 nM	4	448.43	796.49	4.66		2	3	125 nM	3.996	762.72	790.17	2.17		3	5	125 nM	4	832.84	1260.65	3.69
1	13	50 nM	8	449.93	794.36	4.42		2	3	125 nM	7.997	759.02	780.39	2.58		3	5	125 nM	8	810.3	1268.11	3.19
1	13	50 nM	10	34.99	755.64	4.68		2	3	125 nM	9.965	41.79	793.97	2.62		3	5	125 nM	10	97.2	1262.11	3.5
1	13	50 nM	14	115.85	762.47	4.23		2	3	125 nM	13.904	99.73	788.06	2.02		3	5	125 nM	14	175.4	1253.23	3.22
1	13	50 nM	18	129.6	765.39	4.31		2	3	125 nM	17.902	116.46	820.03	2.23		3	5	125 nM	18	193.84	1246.43	3.39
1	13	50 nM	22	130.47	773	4.59		2	3	125 nM	21.904	128	837.83	2.42		3	5	125 nM	22	190.22	1243.51	3.1
1	13	50 nM	26	133.58	775.48	4.76		2	3	125 nM	25.902	134.63	787.69	2.74		3	5	125 nM	26	196.82	1252.2	3.16
1	13	50 nM	30	134.5	763.08	4.42		2	3	125 nM	29.901	131.08	892.85	2.15		3	5	125 nM	30	195.85	1231.75	3.26
1	13	50 nM	34	136.02	761.96	4.87		2	3	125 nM	33.904	132.31	887.29	2.35		3	5	125 nM	34	216.09	1234.51	3.66
1	13	50 nM	38	136.83	762.66	4.44		2	3	125 nM	37.9	128.42	851.02	1.9		3	5	125 nM	38	207.03	1212.33	3.3
1	13	50 nM	42	133.05	753.72	4.17		2	3	125 nM	41.904	128.51	855.24	2.42		3	5	125 nM	42	202.62	1209.59	3.36
1	13	50 nM	46	129.48	750.87	4.39		2	3	125 nM	45.905	125.38	886.6	2.23		3	5	125 nM	46	197.24	1191.18	3.76
1	13	50 nM	50	133.49	758.17	4.5		2	3	125 nM	49.904	129.93	854.41	2.29		3	5	125 nM	50	197.13	1217.65	3.58
1	13	50 nM	54	135.26	767.56	4.15		2	3	125 nM	53.904	132.3	871.05	2.5		3	5	125 nM	54	196.72	1235.23	3.37
1	13	50 nM	58	134.98	757.38	4.26		2	3	125 nM	57.905	133.27	834.91	2.48		3	5	125 nM	58	188.42	1222.16	3.26
1	13	50 nM	62	133.83	767.9	4.5		2	3	125 nM	61.9	131.29	822.66	2.64		3	5	125 nM	62	182.77	1240.66	3.32
1	13	50 nM	66	132.84	769.86	4.63		2	3	125 nM	65.903	131.13	829.31	2.51		3	5	125 nM	66	165.59	1226.54	3.17
1	13	50 nM	70	134.31	760.09	4.6		2	3	125 nM	69.903	128.03	853.31	2.21		3	5	125 nM	70	164.5	1229.56	3.62
1	13	50 nM	74	136.94	740.01	4.18		2	3	125 nM	73.905	130.01	822.63	2		3	5	125 nM	74	175.38	1229.49	3.64
1	13	50 nM	78	139.21	740.44	4.53		2	3	125 nM	77.904	130.88	872.27	2.69		3	5	125 nM	78	184.02	1239.95	3.2
1	13	50 nM	82	136.3	742.89	4.32		2	3	125 nM	81.904	133.95	860.28	2.34		3	5	125 nM	82	173.45	1221.97	3.32
1	13	50 nM	86	137.07	753.32	4.24		2	3	125 nM	85.904	133.74	804.82	2.36		3	5	125 nM	86	170.69	1221.23	3.02
1	13	50 nM	90	137.47	744.67	4.59		2	3	125 nM	89.904	129.09	822.92	1.89		3	5	125 nM	90	168.08	1225.8	3.52
1	13	50 nM	94	140.77	741.59	4.25		2	3	125 nM	93.903	128.8	810.23	2.36		3	5	125 nM	94	192.34	1235.95	3.45
1	13	50 nM	98	139.34	743.19	4.19		2	3	125 nM	97.905	129.43	790.27	2.15		3	5	125 nM	98	202.62	1222.91	3.72
1	1	125 nM	0	966.15	627.28	4.98		2	4	125 nM	0	466.3	375.23	2.52		3	6	125 nM	0	684.4	915.81	3.36
1	1	125 nM	4	968.38	656.41	4.68		2	4	125 nM	4.003	509.99	381.92	2.23		3	6	125 nM	4	656.58	949.71	3.14
1	1	125 nM	8	940.06	540.83	4.11		2	4	125 nM	8.004	510.59	378.46	2.25		3	6	125 nM	8	574.31	932.5	3.21
1	1	125 nM	10	40.63	547.71	4.25		2	4	125 nM	9.972	21.78	337.95	1.75		3	6	125 nM	10	87.32	867.43	3.35
1	1	125 nM	14	213.89	534.44	4.23		2	4	125 nM	13.912	59.18	361.05	2.25		3	6	125 nM	14	161.89	868.3	3.36
1	1	125 nM	18	281.47	570.82	4.35		2	4	125 nM	17.911	79.64	336.02	2.29		3	6	125 nM	18	179.59	829.73	3.47
1	1	125 nM	22	312.74	543.87	4.37		2	4	125 nM	21.91	82.82	366.98	2.15		3	6	125 nM	22	188.33	825.34	3.4
1	1	125 nM	26	332.19	546.95	4.4		2	4	125 nM	25.912	91.05	339.65	2.3		3	6	125 nM	26	186.89	820.39	2.96
1	1	125 nM	30	341.18	515.07	4.59		2	4	125 nM	29.911	99.45	317.92	2.53		3	6	125 nM	30	221.03	876.19	3.22
1	1	125 nM	34	356.95	532.23	4.12		2	4	125 nM	33.911	92.76	318.31	2.15		3	6	125 nM	34	231.07	863.36	3.7
1	1	125 nM	38	361.71	507.15	4.53		2	4	125 nM	37.912	98.04	305.27	2.55		3	6	125 nM	38	264.7	912.25	3.5
1	1	125 nM	42	359.7	499.58	4.16		2	4	125 nM	41.911	101.14	310.44	2.25		3	6	125 nM	42	257.68	936.82	3.26
1	1	125 nM	46	365.6	539.78	3.93		2	4	125 nM	45.912	99.73	324.6	2.18		3	6	125 nM	46	243.43	949.69	2.97
1	1	125 nM	50	372.13	529.54	4.35		2	4	125 nM	49.91	98.34	299.51	2.25		3	6	125 nM	50	233.64	892.82	2.81
1	1	125 nM	54	372.35	466.21	4.35		2	4	125 nM	53.912	94.09	335.88	2.33		3	6	125 nM	54	223.45	920.22	3.07
1	1	125 nM	58	367.88	477.71	4.27		2	4	125 nM	57.911	94.05	312.67	2.52		3	6	125 nM	58	230.62	881.62	3.44
1	1	125 nM	62	367.36	467.55	4.13		2	4	125 nM	61.911	99.88	299.88	2.36		3	6	125 nM	62	245.07	874.92	3.25
1	1	125 nM	66	367.02	462.18	4.64		2	4	125 nM	65.908	93.02	339.47	2.36		3	6	125 nM	66	241.73	864.75	3.35
1	1	125 nM	70	362.9	497.19	3.73		2	4	125 nM	69.907	107.04	310.89	2.18		3	6	125 nM	70	243.99	919.75	2.99
1	1	125 nM	74	366.89	487.54	4.52		2	4	125 nM	73.906	94.96	337.23	2.57		3	6	125 nM	74	251.3	931.81	3.45
1	1	125 nM	78	377.41	542.86	3.92		2	4	125 nM	77.91	101.63	333.96	2.23		3	6	125 nM	78	253.59	940.98	3.48
1	1	125 nM	82	379.34	538.75	4.11		2	4	125 nM	81.911	99.62	366.43	3.03		3	6	125 nM	82	237.75	849.56	3.12
1	1	125 nM	86	376.38	564.76	3.88		2	4	125 nM	85.911	101.49	353.35	2.43		3	6	125 nM	86	238.27	907.63	3.07
1	1	125 nM	90	389.17	613.75	4.61		2	4	125 nM	89.911	103.81	338.91	2.2		3	6	125 nM	90	247.73	876.35	3.64
1	1	125 nM	94	386.78	613.86	4.21		2	4	125 nM	93.912	106.35	329.9	2.38		3	6	125 nM	94	226.38	879.66	3.12
1	1	125 nM	98	394.81	595.24	4.23		2	4	125 nM	97.912	104.77	286.72	2.25		3	6	125 nM	98	222.43	825.37	3.77
1	2	125 nM	0	292.95	421.05	2.31		2	5	125 nM	0	625.84	706.64	2.22		3	7	125 nM	0	1062	904.48	3.6
1	2	125 nM	4	295.88	424.14	2.7		2	5	125 nM	4.002	582.54	698.48	2.12		3	7	125 nM	4	1036.3	877.66	2.9
1	2	125 nM	8	294.59	425.69	2.45		2	5	125 nM	8.003	408.95	688.18	2.42		3	7	125 nM	8	1022.41	876.75	2.64
1	2	125 nM	10	29.88	398.35	2.37		2	5	125 nM	9.968	17.94	658.79	2.62		3	7	125 nM	10	128.45	868.61	2.87
1	2	125 nM	14	93.42	406.35	2.23		2	5	125 nM	13.906	62.36	682.1	2.09		3	7	125 nM	14	240.82	851.04	2.49
1	2	125 nM	18	108.6	403.83	2.55		2	5	125 nM	17.908	81.3	688.65	1.9		3	7	125 nM	18	272.14	791.12	2.44
1	2	125 nM	22	114.48	404.92	2.41		2	5	125 nM	21.91	97.34	694.68	2.67		3	7	125 nM	22	325.92	830.06	2.17
1	2	125 nM	26	119.58	403.71	2.6		2	5	125 nM	25.91	99.83	691.08	2.24		3	7	125 nM	26	322.57	822.28	2.33
1	2	125 nM	30	122.99	410.47	2.29		2	5	125 nM	29.91	99.84	684.6	2.11		3	7	125 nM	30	346.57	811.34	2.42
1	2	125 nM	34	121.89	410.47	2.22		2	5	125 nM	33.908	100.36	692.36	2.35		3	7	125 nM	34	352.95	837.4	2.49
1	2	125 nM	38	122.83	416.86	2.15		2	5	125 nM	37.908	115.22	691.55	2.31		3	7	125 nM	38	353.52	823.95	2.56
1	2	125 nM	42	124.6	409.98	2.14		2	5	125 nM	41.91	113.33	697.8	2.18		3	7	125 nM	42	356.04	827.34	2.87
1	2	125 nM	46	127.29	450.42	2.68		2	5	125 nM	45.911	113.04	695.27	2.82		3	7	125 nM	46	350.88	778.27	2.52
1	2	125 nM	50	128.1	469.35	2.44		2	5	125 nM	49.908	108.22	700.41	2.25		3	7	125 nM	50	363.85	787.1	2.28
1	2	125 nM	54	129.65	479.23	2.39		2	5	125 nM	53.91	110.65	699.65	2.2		3	7	125 nM	54	357.35	821.17	2.44
1	2	125 nM	58	130.77	452.32	2.14		2	5	125 nM	57.911	110.64	699.14	2.91		3	7	125 nM	58	370.57	848.87	2.26
1	2	125 nM	62	132.19	449.09	2.56		2	5	125 nM	61.908	108.51	695.74	2.45		3	7	125 nM	62	376.04	841.11	2.1
1	2	125 nM	66	131.19	437.12	2.44		2	5	125 nM	65.91	111.35	694.36	2.31		3	7	125 nM	66	366.07	853.15	2.56
1	2	125 nM	70	132.44	425.6	2.31		2	5	125 nM	69.91	114.35	709.47	2.05		3	7	125 nM	70	379.35	845.95	2.45
1	2	125 nM	74	134.38	444.19	2.36		2	5	125 nM	73.908	104.46	700.58	2.17		3	7	125 nM	74	371.5	857.92	2.28
1	2	125 nM	78	132.43	455.56	2.47		2	5	125 nM	77.91	98.38	694.13	2.22		3	7	125 nM	78	365.22	853.02	2.31
1	2	125 nM	82	127.56	458.58	2.7		2	5	125 nM	81.91	102.38	690.2	2.66		3	7	125 nM	82	360.83	863.04	2.29
1	2	125 nM	86	131.42	448.99	2.47		2	5	125 nM	85.909	94.95	689.65	2.25		3	7	125 nM	86	367.23	881.17	2.67
1	2	125 nM	90	132.15	446.13	2.83		2	5	125 nM	89.91	99.57	695.74	2.13		3	7	125 nM	90	355.57	798.99	2.5
1	2	125 nM	94	130.81	448.66	2.55		2	5	125 nM	93.91	99.25	692.31	2.07		3	7	125 nM	94	360.82	839.79	2.43
1	2	125 nM	98	133.19	448.53	2.59		2	5	125 nM	97.911	114.16	699.61	2.2		3	7	125 nM	98	334.75	827.39	2.3
1	3	125 nM	0	705	594.28	2.27		2	6	125 nM	0	623.77	906.84	1.97		3	8	125 nM	0	478.99	46.35	2.17
1	3	125 nM	4	712.72	599.46	2.47		2	6	125 nM	4	609.29	918.2	2.68		3	8	125 nM	4	479.22	46.5	2.2
1	3	125 nM	8	688.91	592.47	2.19		2	6	125 nM	8	569.15	917.31	2.46		3	8	125 nM	8	514.29	49.82	2.36
1	3	125 nM	10	17.34	581.17	2.59		2	6	125 nM	9.966	22.18	851.23	2.24		3	8	125 nM	10	40.31	46.44	2.47
1	3	125 nM	14	82.83	578.63	2.24		2	6	125 nM	13.906	88.08	877.96	2.45		3	8	125 nM	14	59.68	44.37	2.26
1	3	125 nM	18	113.4	583.86	2.38		2	6	125 nM	17.906	111.37	881.58	2.64		3	8	125 nM	18	51.6	45.38	2.36
1	3	125 nM	22	126.15	572.06	2.27		2	6	125 nM	21.907	123.19	885.84	2.31		3	8	125 nM	22	58.78	43.85	2.34
1	3	125 nM	26	144.49	570.86	2.5		2	6	125 nM	25.903	132.93	876.9	2.53		3	8	125 nM	26	52	43.7	2.3
1	3	125 nM	30	149.21	565.72	2.4		2	6	125 nM	29.906	139.03	871.39	2.32		3	8	125 nM	30	64.98	44.55	2.35
1	3	125 nM	34	152.25	569.84	2.16		2	6	125 nM	33.906	142.32	869.63	2.84		3	8	125 nM	34	66.98	45.12	2.26
1	3	125 nM	38	163.21	565.22	2.15		2	6	125 nM	37.907	135.69	888.29	2.32		3	8	125 nM	38	63.42	44.03	2.07
1	3	125 nM	42	167.3	553.18	2.14		2	6	125 nM	41.906	141.5	874.39	2.28		3	8	125 nM	42	52.51	42.65	2.46
1	3	125 nM	46	159.84	546.33	1.93		2	6	125 nM	45.906	136.99	888.44	2.22		3	8	125 nM	46	48.15	42.46	2.48
1	3	125 nM	50	156.72	548.24	2.31		2	6	125 nM	49.903	138.26	887.68	2.6		3	8	125 nM	50	43.56	44.27	2.12
1	3	125 nM	54	152.91	560.32	2.02		2	6	125 nM	53.906	143.78	888.7	2.18		3	8	125 nM	54	38.97	43.93	2.48
1	3	125 nM	58	161.48	544.78	2.31		2	6	125 nM	57.906	141.76	892.51	2.35		3	8	125 nM	58	38.87	42.93	2.37
1	3	125 nM	62	156.62	561.04	2.42		2	6	125 nM	61.906	140.95	879.23	2.38		3	8	125 nM	62	38.83	42.87	2.01
1	3	125 nM	66	157.26	558.59	2.22		2	6	125 nM	65.905	138.18	887.45	2.5		3	8	125 nM	66	36.06	43.5	2.04
1	3	125 nM	70	153.03	552.61	2.72		2	6	125 nM	69.906	137.16	885.74	2.77		3	8	125 nM	70	39.21	44.33	2.29
1	3	125 nM	74	159.14	570.01	2.44		2	6	125 nM	73.906	142.25	887.6	2.05		3	8	125 nM	74	37.7	43.56	2.3
1	3	125 nM	78	160.01	566	2.77		2	6	125 nM	77.905	140.35	887.4	2.29		3	8	125 nM	78	34.89	42.74	2.39
1	3	125 nM	82	163.92	565.42	2.54		2	6	125 nM	81.906	139.68	890.98	2.49		3	8	125 nM	82	35.52	41.58	2.28
1	3	125 nM	86	160.32	557.02	1.97		2	6	125 nM	85.906	142.33	895.08	2.57		3	8	125 nM	86	37.25	40.16	2.6
1	3	125 nM	90	153	567.28	2.34		2	6	125 nM	89.907	137.67	897.98	2.23		3	8	125 nM	90	36.87	42.06	2.37
1	3	125 nM	94	154	572.2	2.41		2	6	125 nM	93.907	143.33	903.53	2.5		3	8	125 nM	94	36.2	42.36	2.35
1	3	125 nM	98	152.93	567.35	2.19		2	6	125 nM	97.906	136.45	898.04	2.17		3	8	125 nM	98	33.25	40.32	2.39
1	4	125 nM	0	305.94	45.67	2.24		2	7	125 nM	0	680.07	376.2	2.94		3	9	125 nM	0	1156.24	707.99	2.24
1	4	125 nM	4	305.16	45.8	2.41		2	7	125 nM	3.999	676.85	374.88	2.96		3	9	125 nM	4	1165.1	709.01	2.42
1	4	125 nM	8	302.7	45.85	2.38		2	7	125 nM	8	716.62	367.98	3.09		3	9	125 nM	8	1158.82	750.62	2.39
1	4	125 nM	10	41	37.16	2.12		2	7	125 nM	10.005	46.83	349.87	2.62		3	9	125 nM	10	98.59	732.34	2.32
1	4	125 nM	14	80.68	40.42	2.22		2	7	125 nM	13.945	151.15	357.62	2.9		3	9	125 nM	14	187.83	755.31	2.78
1	4	125 nM	18	87.57	40.65	2.17		2	7	125 nM	17.942	171.84	360.86	2.55		3	9	125 nM	18	218.47	742.7	2.5
1	4	125 nM	22	93.64	42.14	2.33		2	7	125 nM	21.945	183.63	358.27	2.3		3	9	125 nM	22	236	751.5	2.79
1	4	125 nM	26	94.8	40.31	2.28		2	7	125 nM	25.946	187.87	358.94	2.37		3	9	125 nM	26	236.35	728.01	2.48
1	4	125 nM	30	95.17	41.39	2.64		2	7	125 nM	29.945	188.29	369.18	2.4		3	9	125 nM	30	235.71	702.95	2.42
1	4	125 nM	34	97.06	40.83	2.36		2	7	125 nM	33.946	191.15	328.58	2.06		3	9	125 nM	34	256.26	668.78	2.35
1	4	125 nM	38	99.26	40.75	2.13		2	7	125 nM	37.946	191.05	348.76	2.88		3	9	125 nM	38	243.87	673.69	2.63
1	4	125 nM	42	100.04	41.26	2.34		2	7	125 nM	41.944	191.06	337.38	1.95		3	9	125 nM	42	258.26	667.8	2.45
1	4	125 nM	46	101	41.65	2.45		2	7	125 nM	45.946	193.22	344.26	2.05		3	9	125 nM	46	254.73	710.85	2.23
1	4	125 nM	50	102.49	41.92	2.05		2	7	125 nM	49.946	192.76	328.58	2.19		3	9	125 nM	50	258.57	691.42	2.44
1	4	125 nM	54	102.91	41.71	2.42		2	7	125 nM	53.945	193.44	323.12	2.36		3	9	125 nM	54	271.43	652.3	2.65
1	4	125 nM	58	103.77	41.7	2.28		2	7	125 nM	57.946	202.37	346.49	2.46		3	9	125 nM	58	267.75	657.37	2.64
1	4	125 nM	62	105.8	42.09	2.73		2	7	125 nM	61.946	192.99	335.77	2.88		3	9	125 nM	62	271.14	668.62	2.26
1	4	125 nM	66	102.71	41.45	2.48		2	7	125 nM	65.946	194.33	334.83	2.72		3	9	125 nM	66	265.08	675.72	2.46
1	4	125 nM	70	104.21	41.26	1.81		2	7	125 nM	69.945	198.66	340.62	2.6		3	9	125 nM	70	256.18	664.53	2.36
1	4	125 nM	74	105.81	41.44	2.61		2	7	125 nM	73.946	200.3	333.99	2.44		3	9	125 nM	74	250.43	681.42	2.3
1	4	125 nM	78	104.73	42.43	2.85		2	7	125 nM	77.942	207.55	328.76	3.13		3	9	125 nM	78	241.98	678.13	2.06
1	4	125 nM	82	105.78	41.92	2.29		2	7	125 nM	81.946	210.48	323.08	2.28		3	9	125 nM	82	259.75	658.23	2.81
1	4	125 nM	86	105.86	41.91	2.34		2	7	125 nM	85.946	207.12	333.21	2.37		3	9	125 nM	86	267.06	636.45	2.44
1	4	125 nM	90	103.38	41.62	2.08		2	7	125 nM	89.946	204.33	304.46	2.56		3	9	125 nM	90	254.43	623.18	2.43
1	4	125 nM	94	105.08	41.69	2.32		2	7	125 nM	93.944	206.88	308.79	2.24		3	9	125 nM	94	260.94	610.09	2.25
1	4	125 nM	98	105.96	42.31	2.41		2	7	125 nM	97.946	206.91	310.58	2.37		3	9	125 nM	98	253.77	600.66	2.56
1	5	125 nM	0	1429.27	754.91	15.66		2	8	125 nM	0	582.19	928.06	2.24		3	10	125 nM	0.07	802.28	657.76	6.7
1	5	125 nM	4	1340.65	700.05	16.47		2	8	125 nM	3.999	587.78	912.12	2.22		3	10	125 nM	4.072	814.75	643.22	6.28
1	5	125 nM	8	1390.72	722.42	15.82		2	8	125 nM	8	571.36	896.35	2.01		3	10	125 nM	8.072	812.3	629.99	7.03
1	5	125 nM	10	78.99	713.12	14.33		2	8	125 nM	9.964	28.65	827.88	2.83		3	10	125 nM	10.433	150.06	637.54	6.13
1	5	125 nM	14	229.9	721.03	14.86		2	8	125 nM	13.9	81.11	781.29	2.35		3	10	125 nM	14.375	259.46	615.28	6.82
1	5	125 nM	18	293.51	727.46	15.21		2	8	125 nM	17.904	107.89	825.3	2.55		3	10	125 nM	18.376	308.79	597.07	7.14
1	5	125 nM	22	317.78	673.08	15.25		2	8	125 nM	21.905	116.05	827.83	1.84		3	10	125 nM	22.376	326.26	603.85	6.35
1	5	125 nM	26	338.64	693.96	15.51		2	8	125 nM	25.906	116.38	804.62	2.37		3	10	125 nM	26.377	341.92	592.64	6.2
1	5	125 nM	30	356.14	703.37	14.22		2	8	125 nM	29.906	115.88	769.12	1.84		3	10	125 nM	30.372	354.88	602.96	6.02
1	5	125 nM	34	365.68	708.42	14.92		2	8	125 nM	33.905	104.84	769.63	2.33		3	10	125 nM	34.376	361.17	608.62	6.08
1	5	125 nM	38	373.47	710.4	15.74		2	8	125 nM	37.906	101.9	779.02	2.34		3	10	125 nM	38.376	365.91	599.17	6.96
1	5	125 nM	42	359.04	620.32	14.94		2	8	125 nM	41.906	106.21	768.86	2.48		3	10	125 nM	42.375	369.54	616.93	6.34
1	5	125 nM	46	369.08	638.65	15		2	8	125 nM	45.906	100.22	753.29	2.27		3	10	125 nM	46.376	374.34	603.98	6.21
1	5	125 nM	50	363.59	611.11	15.37		2	8	125 nM	49.906	107.23	793.04	2.2		3	10	125 nM	50.377	376.31	628.43	7.04
1	5	125 nM	54	364.86	665.15	14.41		2	8	125 nM	53.906	113.53	790.32	2.43		3	10	125 nM	54.376	381.53	639.58	6.4
1	5	125 nM	58	357.49	617.94	14.79		2	8	125 nM	57.902	112.99	844.29	2.55		3	10	125 nM	58.371	372.86	617.34	6.34
1	5	125 nM	62	355.17	562.71	16.15		2	8	125 nM	61.901	132.6	883.25	2.14		3	10	125 nM	62.377	377.62	590.24	6.37
1	5	125 nM	66	360.66	558.52	14.51		2	8	125 nM	65.906	133.91	885.43	2.39		3	10	125 nM	66.376	379.86	603.68	6.32
1	5	125 nM	70	358.66	543.85	15.13		2	8	125 nM	69.904	123.39	907.74	2.46		3	10	125 nM	70.377	372.32	608.84	6.89
1	5	125 nM	74	363.54	574.55	14.81		2	8	125 nM	73.903	126.83	939.31	2.57		3	10	125 nM	74.376	376.33	617.46	6.27
1	5	125 nM	78	354.58	565.97	15.91		2	8	125 nM	77.905	126.68	903.13	2.19		3	10	125 nM	78.377	375.71	598.7	6.91
1	5	125 nM	82	355.67	556	15.16		2	8	125 nM	81.905	121.09	899.82	1.97		3	10	125 nM	82.376	379.1	599.66	6.23
1	5	125 nM	86	368.41	554.8	16.46		2	8	125 nM	85.906	129.69	936.05	2.96		3	10	125 nM	86.371	376.28	598.16	5.81
1	5	125 nM	90	362.51	559.07	14.82		2	8	125 nM	89.906	125.18	942.52	1.74		3	10	125 nM	90.376	370.93	559.86	6.65
1	5	125 nM	94	370.53	542.25	16.81		2	8	125 nM	93.906	127.29	962.09	2.38		3	10	125 nM	94.374	365.83	584.28	6.32
1	5	125 nM	98	361.05	556.5	15.42		2	8	125 nM	97.906	114.97	979.98	2.29		3	10	125 nM	98.376	375.2	601.34	5.72
1	6	125 nM	0	746.04	1044.39	2.28		2	9	125 nM	0	1205.02	1131.41	2.13		3	11	125 nM	0.069	710.17	2334.39	2.32
1	6	125 nM	4	765.55	1023.01	2.09		2	9	125 nM	3.995	1186.81	1100.2	2.27		3	11	125 nM	4.073	714.71	2355.8	2.37
1	6	125 nM	8	771.02	1049.68	2.5		2	9	125 nM	8	1161.82	1098.64	2.11		3	11	125 nM	8.072	717.15	2353.84	2.16
1	6	125 nM	10	36.72	1029.89	2.06		2	9	125 nM	9.988	73.25	1089.91	2.07		3	11	125 nM	10.44	110.49	2322.87	2.27
1	6	125 nM	14	127.4	989.43	2.22		2	9	125 nM	13.929	170.02	1113.15	1.85		3	11	125 nM	14.383	155.43	2349.19	2.18
1	6	125 nM	18	157.37	977.05	2.51		2	9	125 nM	17.929	209.51	1142.32	2.26		3	11	125 nM	18.378	164.73	2300.34	2.32
1	6	125 nM	22	169.95	954.65	2.47		2	9	125 nM	21.927	233.1	1124.17	2.34		3	11	125 nM	22.381	172.58	2313.07	2.66
1	6	125 nM	26	183.2	937.81	2.04		2	9	125 nM	25.929	239.28	1132.94	2.39		3	11	125 nM	26.382	176.84	2322.34	2.33
1	6	125 nM	30	190.97	959.28	2.38		2	9	125 nM	29.929	243.87	1187.01	2.5		3	11	125 nM	30.382	178.11	2283.78	2.2
1	6	125 nM	34	200.25	989.04	2.18		2	9	125 nM	33.928	251.53	1171.78	2.12		3	11	125 nM	34.383	187.28	2321.89	2.36
1	6	125 nM	38	202.74	1005.81	2.25		2	9	125 nM	37.927	251.64	1128.51	2.53		3	11	125 nM	38.382	187	2321.16	2.26
1	6	125 nM	42	205.31	983.56	2.34		2	9	125 nM	41.929	253.78	1143.26	2.68		3	11	125 nM	42.382	186.99	2298.07	2.49
1	6	125 nM	46	213.87	997.02	2.08		2	9	125 nM	45.929	261.83	1177.31	2.21		3	11	125 nM	46.377	187.16	2328.43	2.23
1	6	125 nM	50	221.53	1007.05	2.53		2	9	125 nM	49.929	278.41	1164	2.3		3	11	125 nM	50.382	190.32	2357.9	2.54
1	6	125 nM	54	222	989.47	2.44		2	9	125 nM	53.927	286.59	1163.65	1.95		3	11	125 nM	54.381	189.23	2327.1	2.11
1	6	125 nM	58	235.55	953.16	2.23		2	9	125 nM	57.929	285.9	1146.18	2.44		3	11	125 nM	58.378	190.52	2349.73	2.82
1	6	125 nM	62	239.58	965.74	2.56		2	9	125 nM	61.93	289.69	1090.34	1.8		3	11	125 nM	62.383	187.81	2338.95	2.76
1	6	125 nM	66	240.4	962.07	2.39		2	9	125 nM	65.929	297.36	1066.24	2.18		3	11	125 nM	66.381	188.11	2314.84	2.45
1	6	125 nM	70	244.4	996.52	1.87		2	9	125 nM	69.929	288.08	1053.92	2.53		3	11	125 nM	70.382	185.12	2287.34	2.21
1	6	125 nM	74	250.8	976.1	2.43		2	9	125 nM	73.925	282.34	1019.22	2.41		3	11	125 nM	74.382	191.86	2329	2.51
1	6	125 nM	78	237.76	1050.49	2.34		2	9	125 nM	77.929	275.36	1018.05	2.48		3	11	125 nM	78.383	189.28	2287.52	2.46
1	6	125 nM	82	244.38	1023.46	2.05		2	9	125 nM	81.929	268.82	1043.1	2.53		3	11	125 nM	82.378	191.98	2298.95	2
1	6	125 nM	86	248.95	1019.57	2.42		2	9	125 nM	85.926	277.36	997.2	2.37		3	11	125 nM	86.378	191.29	2259.01	2.38
1	6	125 nM	90	245.86	1010.43	2.13		2	9	125 nM	89.927	282.18	1025.44	2.42		3	11	125 nM	90.379	189.36	2225.88	2.02
1	6	125 nM	94	249.14	1010.61	2.33		2	9	125 nM	93.929	292.34	1045.54	2.31		3	11	125 nM	94.382	193.31	2229.57	2.33
1	6	125 nM	98	246.17	1031.96	2.13		2	9	125 nM	97.929	294.97	1025.31	2.36		3	11	125 nM	98.381	195.68	2226.43	2.31
1	7	125 nM	0	514.81	325.36	3.69		2	10	125 nM	0	606.52	948.3	3.12		3	12	125 nM	0.075	1578.22	1551.35	2.64
1	7	125 nM	4	507.07	317.59	3.73		2	10	125 nM	4	609.52	929.24	2.85		3	12	125 nM	4.072	1576.43	1555.44	2.76
1	7	125 nM	8	522.21	320.21	3.24		2	10	125 nM	8	632.48	943.36	2.57		3	12	125 nM	8.073	1528.32	1550.98	2.54
1	7	125 nM	10	27.22	318.31	3.41		2	10	125 nM	9.971	56.98	900.64	2.18		3	12	125 nM	10.422	47.5	1508.36	2.3
1	7	125 nM	14	101.77	318.82	3.84		2	10	125 nM	13.913	154.98	912.29	2.72		3	12	125 nM	14.365	132.24	1525.03	2.59
1	7	125 nM	18	117.44	320.13	3.58		2	10	125 nM	17.908	182.11	925.67	2.35		3	12	125 nM	18.359	170.29	1545.94	2.49
1	7	125 nM	22	126	317.59	3.56		2	10	125 nM	21.906	201.05	922.72	2.39		3	12	125 nM	22.363	181.29	1508.76	2.54
1	7	125 nM	26	130.18	318.01	3.96		2	10	125 nM	25.913	232.72	866.06	2.85		3	12	125 nM	26.363	199.29	1541.22	2.48
1	7	125 nM	30	131.23	319.47	3.57		2	10	125 nM	29.912	228.56	849.02	2.51		3	12	125 nM	30.362	210.52	1533.44	2.33
1	7	125 nM	34	133.21	305.06	3.29		2	10	125 nM	33.912	218.33	833.49	2.5		3	12	125 nM	34.366	214.48	1533.73	2.53
1	7	125 nM	38	131.73	311.79	4.46		2	10	125 nM	37.912	246.29	845.66	2.66		3	12	125 nM	38.365	216.6	1527.14	2.42
1	7	125 nM	42	133.5	304.04	3.27		2	10	125 nM	41.913	250.34	778.11	2.77		3	12	125 nM	42.36	227.46	1547.78	2.3
1	7	125 nM	46	136.62	295.78	3.67		2	10	125 nM	45.912	220.28	659.82	2.59		3	12	125 nM	46.363	228.7	1542.97	2.27
1	7	125 nM	50	138.17	291.11	3.35		2	10	125 nM	49.912	250.54	759.59	2.84		3	12	125 nM	50.363	233.94	1531.75	2.49
1	7	125 nM	54	137.69	292.22	3.74		2	10	125 nM	53.913	237.88	756.24	3.09		3	12	125 nM	54.364	234.94	1521.96	2.52
1	7	125 nM	58	137.57	301.94	3.56		2	10	125 nM	57.912	224.05	742.02	2.74		3	12	125 nM	58.363	236.08	1512.4	2.49
1	7	125 nM	62	136.19	313.16	3.42		2	10	125 nM	61.912	258.77	806.15	2.3		3	12	125 nM	62.364	243.02	1542.54	1.98
1	7	125 nM	66	138.95	299.03	3.14		2	10	125 nM	65.911	275.51	776.12	2.66		3	12	125 nM	66.365	248.8	1547.78	2.45
1	7	125 nM	70	141.01	263.16	3.2		2	10	125 nM	69.913	273.75	742.85	2.24		3	12	125 nM	70.359	239.04	1521.27	2.16
1	7	125 nM	74	141.58	280.41	3.63		2	10	125 nM	73.912	286.96	799.98	2.59		3	12	125 nM	74.364	239.58	1513.1	2.74
1	7	125 nM	78	144.33	295.21	3.32		2	10	125 nM	77.911	292.97	801.62	2.76		3	12	125 nM	78.363	246.53	1548.92	2.49
1	7	125 nM	82	140.46	309.57	3.69		2	10	125 nM	81.913	278.94	774.21	2.42		3	12	125 nM	82.365	247.94	1541.02	2.21
1	7	125 nM	86	141.66	296.18	4.16		2	10	125 nM	85.91	271.68	757.41	2.51		3	12	125 nM	86.364	244.87	1528.84	2.67
1	7	125 nM	90	145.54	276.65	3.2		2	10	125 nM	89.913	290.1	768.16	2.59		3	12	125 nM	90.365	248.18	1537.26	2.58
1	7	125 nM	94	149.48	286.33	3.05		2	10	125 nM	93.913	284.48	746.56	2.17		3	12	125 nM	94.362	252.25	1537.1	2.66
1	7	125 nM	98	151.55	278	3.1		2	10	125 nM	97.912	286.58	816.41	2.72		3	12	125 nM	98.365	254.62	1550.63	2.56
1	8	125 nM	0	270.45	352.1	2.24		2	11	125 nM	0	593.74	700.26	1.98		3	1	150 nM	0.074	1514.03	1640.98	2.75
1	8	125 nM	4	269.27	348.32	2.15		2	11	125 nM	4	553.94	753.98	2.31		3	1	150 nM	4.077	1542.63	1634.26	2.43
1	8	125 nM	8	269.13	359.97	2.42		2	11	125 nM	8	549.05	755.17	2.03		3	1	150 nM	8.074	1527.15	1653.44	2.29
1	8	125 nM	10	31.11	344.41	2.16		2	11	125 nM	9.962	43.75	719.93	2.43		3	1	150 nM	10.433	50.91	1605.52	2.35
1	8	125 nM	14	76.23	349.72	2.38		2	11	125 nM	13.901	93.61	724.91	2.67		3	1	150 nM	14.375	140.08	1606.47	2.51
1	8	125 nM	18	86.86	349.37	2.05		2	11	125 nM	17.896	101.45	742.37	2.27		3	1	150 nM	18.376	168.66	1600.4	2.9
1	8	125 nM	22	91.16	352.57	2.43		2	11	125 nM	21.902	114.73	724.3	2.43		3	1	150 nM	22.376	178.25	1607.3	2.69
1	8	125 nM	26	94.02	360.67	2.46		2	11	125 nM	25.902	117.5	718.96	1.97		3	1	150 nM	26.376	188.71	1604.05	2.75
1	8	125 nM	30	90.49	360.44	2.36		2	11	125 nM	29.897	119.5	721.01	2.18		3	1	150 nM	30.374	188.78	1606.3	2.66
1	8	125 nM	34	92.51	349.55	2.15		2	11	125 nM	33.896	122.84	724.59	2.56		3	1	150 nM	34.37	192.48	1604.27	2.4
1	8	125 nM	38	91.52	357.1	2.56		2	11	125 nM	37.902	124.43	713.93	2.56		3	1	150 nM	38.375	198.64	1615.21	2.69
1	8	125 nM	42	94.18	356.19	2.1		2	11	125 nM	41.902	127.34	717.43	2.62		3	1	150 nM	42.376	209.21	1609.77	2.78
1	8	125 nM	46	90.29	369.57	2.19		2	11	125 nM	45.9	123.4	712.53	2.07		3	1	150 nM	46.375	203.89	1610.18	2.43
1	8	125 nM	50	91.04	370.32	2.07		2	11	125 nM	49.9	125.54	724.86	2.59		3	1	150 nM	50.376	210.37	1606.61	2.87
1	8	125 nM	54	94.11	360.19	2.37		2	11	125 nM	53.901	130.67	734.3	2.44		3	1	150 nM	54.376	208.12	1613.28	2.69
1	8	125 nM	58	94.07	367.64	1.86		2	11	125 nM	57.898	134.58	723.51	1.83		3	1	150 nM	58.375	207.84	1612.59	2.33
1	8	125 nM	62	95.75	359.89	2.07		2	11	125 nM	61.902	130.37	699.16	2.65		3	1	150 nM	62.376	211.14	1609.14	2.57
1	8	125 nM	66	94.43	371.34	2.46		2	11	125 nM	65.902	134.85	731.49	2.38		3	1	150 nM	66.377	209.83	1596.74	2.54
1	8	125 nM	70	95.8	370.54	2.64		2	11	125 nM	69.902	133.53	715.8	2.28		3	1	150 nM	70.376	213.95	1598.78	2.36
1	8	125 nM	74	95.94	373.73	2.27		2	11	125 nM	73.902	133.99	722.63	2.2		3	1	150 nM	74.375	214.13	1585	2.8
1	8	125 nM	78	96.65	369.79	2.08		2	11	125 nM	77.902	131.05	720.42	2.4		3	1	150 nM	78.376	218.88	1588.35	2.6
1	8	125 nM	82	94.2	361.05	2.49		2	11	125 nM	81.902	131.17	720.25	2.53		3	1	150 nM	82.375	216.45	1578.17	3.11
1	8	125 nM	86	93.8	369.77	2.28		2	11	125 nM	85.901	131.05	725.44	2.29		3	1	150 nM	86.374	222.41	1572.11	2.76
1	8	125 nM	90	96.09	368.16	2.3		2	11	125 nM	89.902	129.83	710.85	2.5		3	1	150 nM	90.376	223.55	1580.4	2.61
1	8	125 nM	94	96.11	372.98	2.23		2	11	125 nM	93.903	131.37	719.79	2.08		3	1	150 nM	94.377	228.15	1561.32	2.8
1	8	125 nM	98	99.15	365.43	2.62		2	11	125 nM	97.898	136.16	709.05	2.69		3	1	150 nM	98.376	232.37	1553.61	2.92
1	9	125 nM	0	1103.16	59.18	19.54		2	12	125 nM	0	878.86	957.44	2.65		3	2	150 nM	0.068	1029.42	1173.79	2.2
1	9	125 nM	4	1091.24	58.81	18.87		2	12	125 nM	4	905.55	910.45	2.3		3	2	150 nM	4.071	1021.91	1141.05	2.62
1	9	125 nM	8	1094.87	58.78	19.41		2	12	125 nM	7.999	917.78	893.7	2.49		3	2	150 nM	8.072	1037.69	1154.76	2.54
1	9	125 nM	10	39.28	57.28	19.45		2	12	125 nM	9.962	52.79	897.09	2.21		3	2	150 nM	10.397	188.01	1160.72	2.33
1	9	125 nM	14	185.27	55.95	18.82		2	12	125 nM	13.899	139.2	1003.85	2.27		3	2	150 nM	14.34	324.76	1170.66	2.39
1	9	125 nM	18	248.42	55.26	19.14		2	12	125 nM	17.902	170.59	989.51	2.33		3	2	150 nM	18.341	361.12	1199.95	2.54
1	9	125 nM	22	288.01	55.78	19.69		2	12	125 nM	21.903	186.31	1040.15	2.22		3	2	150 nM	22.34	381.2	1129.8	2.38
1	9	125 nM	26	288.39	53.43	18.71		2	12	125 nM	25.899	195.14	997.45	2.64		3	2	150 nM	26.341	381.15	1108.53	2.48
1	9	125 nM	30	300.84	52.53	18.96		2	12	125 nM	29.902	214.13	985.5	2.51		3	2	150 nM	30.34	398.89	1097.89	2.53
1	9	125 nM	34	313.34	53.01	18.57		2	12	125 nM	33.903	217.43	952.5	2.27		3	2	150 nM	34.339	401.66	1162.11	2.06
1	9	125 nM	38	314.45	52.78	18.65		2	12	125 nM	37.901	225.54	910.81	2.31		3	2	150 nM	38.34	400.71	1167.74	2.15
1	9	125 nM	42	323.3	53.37	18.19		2	12	125 nM	41.901	233.54	935.28	2.36		3	2	150 nM	42.34	398.47	1121.7	2.28
1	9	125 nM	46	311.55	53.73	18.07		2	12	125 nM	45.898	226.78	966.37	2.24		3	2	150 nM	46.342	406.74	1118.39	2.53
1	9	125 nM	50	301.62	52.99	18.49		2	12	125 nM	49.898	230.03	989.57	2.35		3	2	150 nM	50.341	412.86	1126.59	2.05
1	9	125 nM	54	307.95	53.35	18.45		2	12	125 nM	53.901	231.9	944.85	2.19		3	2	150 nM	54.34	402.55	1124.77	2.68
1	9	125 nM	58	308.37	52.99	17.94		2	12	125 nM	57.899	239.09	875.53	2.5		3	2	150 nM	58.339	400.83	1087.66	2
1	9	125 nM	62	299.23	53.27	18.06		2	12	125 nM	61.902	230.98	942.73	2.16		3	2	150 nM	62.341	389.84	1080.56	1.81
1	9	125 nM	66	307.42	53.41	18.44		2	12	125 nM	65.903	230.14	929.34	2.82		3	2	150 nM	66.341	391.73	1103.07	2.62
1	9	125 nM	70	303.16	52.96	17.63		2	12	125 nM	69.903	222.2	936.03	2.55		3	2	150 nM	70.34	388.85	1068.85	2.4
1	9	125 nM	74	286.64	53.28	17.57		2	12	125 nM	73.903	219.13	909.42	2.06		3	2	150 nM	74.341	398.98	1058.14	2.13
1	9	125 nM	78	287.29	53.28	18.18		2	12	125 nM	77.903	223.13	914.75	2.15		3	2	150 nM	78.34	398.35	1081.68	2.34
1	9	125 nM	82	302.17	53.81	18.66		2	12	125 nM	81.903	218.15	893.16	2.24		3	2	150 nM	82.339	386.42	1025.39	2.31
1	9	125 nM	86	305.04	52.94	18.24		2	12	125 nM	85.903	216.32	889.59	2.07		3	2	150 nM	86.341	388.91	990.96	2.34
1	9	125 nM	90	323.62	52.39	17.84		2	12	125 nM	89.903	215.04	879.62	2.5		3	2	150 nM	90.34	358.41	994.61	2.53
1	9	125 nM	94	314	52.44	17.74		2	12	125 nM	93.902	217.5	923.36	2.27		3	2	150 nM	94.339	385.63	1082.37	2.22
1	9	125 nM	98	313.43	52.92	19.11		2	12	125 nM	97.902	219.91	911.63	2.3		3	2	150 nM	98.34	387.25	1075.3	2.57
1	10	125 nM	0	301.42	406.48	NA		2	13	125 nM	0	566.6	931.19	6.53		3	3	150 nM	0.071	2246.16	2835.32	2.4
1	10	125 nM	4	311.3	420.85	NA		2	13	125 nM	3.995	584.68	993.17	6.51		3	3	150 nM	4.073	2255.67	2832.59	2.18
1	10	125 nM	8	317.89	447.97	NA		2	13	125 nM	8	562.97	916.55	7.4		3	3	150 nM	8.072	2281.51	2789.03	2.46
1	10	125 nM	10	40.38	412.67	NA		2	13	125 nM	9.965	37	905.02	8.06		3	3	150 nM	10.394	112.2	2809.98	2.26
1	10	125 nM	14	99.85	409.56	NA		2	13	125 nM	13.905	93.3	842.8	7.98		3	3	150 nM	14.336	270.72	2860.36	2.57
1	10	125 nM	18	115.4	402.7	NA		2	13	125 nM	17.904	109.35	875.45	8.59		3	3	150 nM	18.336	336.66	2778.48	2.15
1	10	125 nM	22	121.42	386.57	NA		2	13	125 nM	21.901	119.08	857.33	7.94		3	3	150 nM	22.335	374.14	2846.84	2.48
1	10	125 nM	26	121	378.11	NA		2	13	125 nM	25.899	121.71	775.35	5.85		3	3	150 nM	26.337	396.14	2759.78	2.24
1	10	125 nM	30	123.84	369.05	NA		2	13	125 nM	29.906	125.73	840.97	6.12		3	3	150 nM	30.332	424.71	2758.88	2.35
1	10	125 nM	34	129.52	377.64	NA		2	13	125 nM	33.905	134.34	739.93	6.39		3	3	150 nM	34.337	426.26	2761.83	1.98
1	10	125 nM	38	129.62	393.94	NA		2	13	125 nM	37.905	134.35	765.4	6.42		3	3	150 nM	38.336	434.74	2721.35	2.47
1	10	125 nM	42	131.3	424	NA		2	13	125 nM	41.901	137	759.22	5.1		3	3	150 nM	42.335	422.76	2719.04	2.43
1	10	125 nM	46	135.28	433.49	NA		2	13	125 nM	45.901	136.46	743.11	4.57		3	3	150 nM	46.338	429.03	2754.56	2.17
1	10	125 nM	50	135.71	439.53	NA		2	13	125 nM	49.901	138.77	701.96	4.35		3	3	150 nM	50.337	418.41	2735.62	2.48
1	10	125 nM	54	138.38	449.82	NA		2	13	125 nM	53.9	134.8	737.68	4.53		3	3	150 nM	54.336	419.18	2713.16	2.6
1	10	125 nM	58	140.13	427.84	NA		2	13	125 nM	57.906	138.4	709.95	5.19		3	3	150 nM	58.337	431.94	2671.7	2.52
1	10	125 nM	62	136.98	408.53	NA		2	13	125 nM	61.905	132.23	692.65	4.41		3	3	150 nM	62.336	437.65	2670	2.36
1	10	125 nM	66	135.22	403.84	NA		2	13	125 nM	65.905	140.73	742.45	5.11		3	3	150 nM	66.337	456.87	2666.98	2.32
1	10	125 nM	70	133.63	347.11	NA		2	13	125 nM	69.906	139.91	679.38	3.95		3	3	150 nM	70.336	459.75	2670.89	2.14
1	10	125 nM	74	134.22	384.72	NA		2	13	125 nM	73.906	142.68	765.56	4.42		3	3	150 nM	74.337	469.81	2692.13	2.48
1	10	125 nM	78	137.08	379.13	NA		2	13	125 nM	77.905	144.48	722.49	7.9		3	3	150 nM	78.333	463.39	2652.69	2.51
1	10	125 nM	82	131.89	390.36	NA		2	13	125 nM	81.906	144.09	708.67	7.83		3	3	150 nM	82.338	466.29	2702.57	2.53
1	10	125 nM	86	135.15	393.86	NA		2	13	125 nM	85.906	146.01	748.1	7.58		3	3	150 nM	86.337	458.62	2627.19	2.59
1	10	125 nM	90	134.37	393.16	NA		2	13	125 nM	89.905	144.33	748.97	8.11		3	3	150 nM	90.332	455.3	2620.58	2.58
1	10	125 nM	94	138.44	426.8	NA		2	13	125 nM	93.906	147.59	672.37	8.11		3	3	150 nM	94.335	475.22	2697.19	2.29
1	10	125 nM	98	142.18	441.28	NA		2	13	125 nM	97.906	145.63	734.88	8.27		3	3	150 nM	98.332	487.25	2682.18	2.33
1	11	125 nM	0	729.39	53.53	1.94		2	14	125 nM	0	219.99	209.63	2.51		3	4	150 nM	0.076	1185.13	537.31	2.18
1	11	125 nM	4	742.15	53.55	2.38		2	14	125 nM	3.999	224.47	216.67	2.65		3	4	150 nM	4.075	1173.99	513.72	2.42
1	11	125 nM	8	743.43	53.31	2.11		2	14	125 nM	8	252.83	215.88	2.24		3	4	150 nM	8.076	1169.44	504.55	2.25
1	11	125 nM	10	59.81	51.25	2.32		2	14	125 nM	9.968	22.75	201.13	2.34		3	4	150 nM	10.408	254.74	493.09	1.84
1	11	125 nM	14	177.55	52.24	2.27		2	14	125 nM	13.908	62.19	200.84	2.16		3	4	150 nM	14.349	357.48	479.16	1.91
1	11	125 nM	18	219.45	52.42	2.07		2	14	125 nM	17.908	78.2	196.68	2.6		3	4	150 nM	18.349	413.96	508.59	2.19
1	11	125 nM	22	240.53	52.12	2.37		2	14	125 nM	21.908	84.35	192.76	2.31		3	4	150 nM	22.349	386.26	441.39	2.41
1	11	125 nM	26	251.65	51.76	2.35		2	14	125 nM	25.906	95.63	201.03	2.36		3	4	150 nM	26.349	404.42	493.43	2.5
1	11	125 nM	30	261.71	50.92	2.25		2	14	125 nM	29.908	96.53	204.48	2.46		3	4	150 nM	30.348	417.47	464.07	2.63
1	11	125 nM	34	266.96	51.07	2.43		2	14	125 nM	33.908	98.06	200.61	1.93		3	4	150 nM	34.351	401.87	351.84	2.59
1	11	125 nM	38	271.35	50.06	2.18		2	14	125 nM	37.904	100.1	202.01	2.9		3	4	150 nM	38.35	437.15	378.7	2.22
1	11	125 nM	42	255.76	50.43	2.22		2	14	125 nM	41.903	97.71	207.23	2.28		3	4	150 nM	42.349	441.33	403.36	2.67
1	11	125 nM	46	276.68	50.31	1.88		2	14	125 nM	45.909	96.88	204.26	1.97		3	4	150 nM	46.351	418.25	442.24	2.2
1	11	125 nM	50	283.62	50.64	2.34		2	14	125 nM	49.909	97.92	205.76	2.22		3	4	150 nM	50.349	414.28	428.65	2.32
1	11	125 nM	54	288.64	49.88	2.22		2	14	125 nM	53.908	96.44	205.36	2.32		3	4	150 nM	54.349	403.48	366.46	2.01
1	11	125 nM	58	292.08	49.94	2.16		2	14	125 nM	57.908	90.18	195.64	2.13		3	4	150 nM	58.345	407.88	340.89	2.03
1	11	125 nM	62	293.68	50.66	2.24		2	14	125 nM	61.908	86.51	184.38	2.52		3	4	150 nM	62.349	410.26	341.11	2.09
1	11	125 nM	66	294.76	50.04	2.47		2	14	125 nM	65.908	91.39	205.34	2		3	4	150 nM	66.349	376.8	326.33	2.37
1	11	125 nM	70	298.67	49.83	2.15		2	14	125 nM	69.909	87.11	199.81	2.31		3	4	150 nM	70.35	421.27	360.35	2.39
1	11	125 nM	74	300.37	49.29	2.43		2	14	125 nM	73.908	87.42	198.49	2.23		3	4	150 nM	74.349	449.47	381.38	2.69
1	11	125 nM	78	302.08	50.54	2.52		2	14	125 nM	77.908	84.89	190.49	2.18		3	4	150 nM	78.344	447.62	388.68	1.88
1	11	125 nM	82	305.3	49.98	2.23		2	14	125 nM	81.908	83.69	186.55	2.16		3	4	150 nM	82.35	450.94	415.23	2.56
1	11	125 nM	86	307.31	50.39	2.4		2	14	125 nM	85.909	83.09	152.45	2.02		3	4	150 nM	86.349	431.79	428.38	2.05
1	11	125 nM	90	309.49	48.84	2.05		2	14	125 nM	89.909	78.17	152.4	2.17		3	4	150 nM	90.35	434.3	414.81	2.14
1	11	125 nM	94	310.71	50.33	2.28		2	14	125 nM	93.908	89.29	193.83	2.3		3	4	150 nM	94.345	436.91	368.09	1.95
1	11	125 nM	98	312.75	50.15	2.46		2	14	125 nM	97.908	84.26	167.16	2.32		3	4	150 nM	98.35	403.33	373.36	2.25
1	12	125 nM	0	246.14	275.35	4.39		2	1	150 nM	0	684.94	734.62	2.39		3	5	150 nM	0.078	911.4	539.57	2.5
1	12	125 nM	4	255.51	285.48	4.65		2	1	150 nM	3.999	731.31	744.91	2.09		3	5	150 nM	4.075	948.66	590.81	2.5
1	12	125 nM	8	262.72	290.1	4.98		2	1	150 nM	8	724.18	762.33	2.14		3	5	150 nM	8.076	903.28	558.5	2.67
1	12	125 nM	10	17.81	277.01	4.99		2	1	150 nM	9.966	24.03	746.79	2.94		3	5	150 nM	10.421	195.69	486.32	2.83
1	12	125 nM	14	81.17	288.56	4.55		2	1	150 nM	13.901	83.51	739.26	2.47		3	5	150 nM	14.364	322.51	470.14	2.19
1	12	125 nM	18	107.88	289.61	4.89		2	1	150 nM	17.901	105.02	740.19	2.41		3	5	150 nM	18.363	382.23	518.57	2.36
1	12	125 nM	22	121.19	275.2	4.52		2	1	150 nM	21.905	118.33	737.54	2.7		3	5	150 nM	22.36	426.26	574.38	2.3
1	12	125 nM	26	111.42	289.77	4.81		2	1	150 nM	25.906	122.8	738.3	2.78		3	5	150 nM	26.361	411.84	528.32	1.99
1	12	125 nM	30	111.45	289.84	4.78		2	1	150 nM	29.906	122.67	717.99	2.24		3	5	150 nM	30.363	423.77	549.3	1.96
1	12	125 nM	34	116.22	287.21	4.83		2	1	150 nM	33.906	129.82	718.52	2.32		3	5	150 nM	34.362	451.85	566.12	2.16
1	12	125 nM	38	116.81	283.44	4.65		2	1	150 nM	37.906	129.31	712.11	1.99		3	5	150 nM	38.356	439.84	584.11	2.04
1	12	125 nM	42	105.14	287.24	4.61		2	1	150 nM	41.901	132.98	708.99	2.35		3	5	150 nM	42.363	457.8	594.48	2.44
1	12	125 nM	46	117.62	287.3	4.77		2	1	150 nM	45.9	134.03	708.31	1.95		3	5	150 nM	46.362	450.36	649.39	2.67
1	12	125 nM	50	115.05	290.59	4.42		2	1	150 nM	49.905	137.49	702.32	2.25		3	5	150 nM	50.363	465.15	646.09	2.34
1	12	125 nM	54	118.4	292.14	4.23		2	1	150 nM	53.902	135.83	711.96	2.28		3	5	150 nM	54.362	487.12	639.61	2.46
1	12	125 nM	58	122.09	300.91	4.69		2	1	150 nM	57.901	135.31	705.04	2.65		3	5	150 nM	58.359	501.49	595.47	2.31
1	12	125 nM	62	128.68	312.72	4.21		2	1	150 nM	61.906	132.22	704	2		3	5	150 nM	62.361	499.6	650.68	2.32
1	12	125 nM	66	108.11	307.55	4.61		2	1	150 nM	65.904	132.09	711.33	2.75		3	5	150 nM	66.357	476.39	665.35	2.32
1	12	125 nM	70	112.24	315.35	4.62		2	1	150 nM	69.902	130.07	713.21	2.26		3	5	150 nM	70.363	472.57	634.39	2.35
1	12	125 nM	74	118.32	314.82	4.37		2	1	150 nM	73.902	132.5	707.89	2.27		3	5	150 nM	74.361	495.97	705.22	2.51
1	12	125 nM	78	110.75	308.76	5.02		2	1	150 nM	77.903	130.91	720.2	2.45		3	5	150 nM	78.358	477.58	706.24	2.2
1	12	125 nM	82	108.6	284.38	4.56		2	1	150 nM	81.905	133.21	704.61	2.29		3	5	150 nM	82.363	477.12	702.52	2.06
1	12	125 nM	86	105.69	276.59	4.75		2	1	150 nM	85.901	133.93	703	2.24		3	5	150 nM	86.362	478.49	716.23	2.43
1	12	125 nM	90	115.69	310.19	4.6		2	1	150 nM	89.905	130.91	712.79	2.26		3	5	150 nM	90.362	451.37	730.78	2.11
1	12	125 nM	94	106.23	295.29	4.83		2	1	150 nM	93.903	125.78	712.39	2.23		3	5	150 nM	94.363	505.27	670.93	2.5
1	12	125 nM	98	103.82	305.54	4.41		2	1	150 nM	97.905	125.95	709.75	3.01		3	5	150 nM	98.362	530.63	729.15	2.51
1	13	125 nM	0	342.91	352.16	4.96		2	2	150 nM	0	428.65	280.96	2.04		3	6	150 nM	0.076	695.87	664.51	2.54
1	13	125 nM	4	321.27	354.9	4.41		2	2	150 nM	4.002	432.95	282.88	2.38		3	6	150 nM	4.076	687.22	664.19	2.43
1	13	125 nM	8	342.54	349.8	4.48		2	2	150 nM	8.002	431.14	286.22	2.16		3	6	150 nM	8.076	676.58	664.47	2.46
1	13	125 nM	10	25.1	336.41	4.66		2	2	150 nM	9.966	56.5	269.56	2.38		3	6	150 nM	10.409	170.51	644.47	2.67
1	13	125 nM	14	85.01	340.79	4.39		2	2	150 nM	13.907	127.13	263.59	2.26		3	6	150 nM	14.351	253.74	632.2	2.36
1	13	125 nM	18	99.74	344.83	4.59		2	2	150 nM	17.907	143.82	266.73	2.31		3	6	150 nM	18.352	266.43	629.13	2.25
1	13	125 nM	22	111.85	333.68	4.16		2	2	150 nM	21.903	154.2	263.42	2.49		3	6	150 nM	22.346	275.45	617.42	2.52
1	13	125 nM	26	112.66	341.63	4.78		2	2	150 nM	56.082	164.41	284.36	2.03		3	6	150 nM	26.352	288.21	624.76	2.33
1	13	125 nM	30	114.15	333.14	4.64		2	2	150 nM	57.173	163.57	273.03	2.7		3	6	150 nM	30.351	289.51	620.27	2.15
1	13	125 nM	34	115	341.23	4.07		2	2	150 nM	58.264	165.29	268.31	2.8		3	6	150 nM	34.352	291.06	621.25	2.3
1	13	125 nM	38	115.25	338.39	4.54		2	2	150 nM	59.355	161.99	272.64	2.02		3	6	150 nM	38.352	282.03	626.79	2.36
1	13	125 nM	42	116.08	333.53	4.96		2	2	150 nM	60.447	164.63	274.71	2.45		3	6	150 nM	42.35	284.56	620.51	1.93
1	13	125 nM	46	116.92	340.88	4.5		2	2	150 nM	61.538	163.08	277.59	2.59		3	6	150 nM	46.352	273.56	613.29	1.93
1	13	125 nM	50	118.44	335.62	4.32		2	2	150 nM	62.63	162.34	275.87	2.27		3	6	150 nM	50.351	283.6	613.1	2.64
1	13	125 nM	54	117.31	333.92	4.74		2	2	150 nM	63.721	159.83	273.92	2.04		3	6	150 nM	54.352	299.44	614.34	2.01
1	13	125 nM	58	115.13	340.08	4.47		2	2	150 nM	64.812	161.13	275.35	2.35		3	6	150 nM	58.351	315.93	622.35	2.14
1	13	125 nM	62	111.4	324.05	5.05		2	2	150 nM	65.904	158.49	279.76	2.51		3	6	150 nM	62.353	308.42	591.61	2.21
1	13	125 nM	66	112.91	333.2	4.53		2	2	150 nM	66.995	162.02	265.19	2.26		3	6	150 nM	66.348	317.96	609.61	2.35
1	13	125 nM	70	111.14	325.31	4.35		2	2	150 nM	69.905	165.75	279.39	2.25		3	6	150 nM	70.351	337.71	621.6	2.24
1	13	125 nM	74	113.72	323.78	4.52		2	2	150 nM	73.906	168.42	277.12	2.33		3	6	150 nM	74.352	334.82	623.51	2.31
1	13	125 nM	78	112.29	324.25	4.39		2	2	150 nM	77.902	167.92	284.56	2.46		3	6	150 nM	78.353	325.12	621.92	2.54
1	13	125 nM	82	114.62	317.85	4.6		2	2	150 nM	81.902	169.42	279.86	2.46		3	6	150 nM	82.348	319.4	626.44	2.3
1	13	125 nM	86	114.29	320.02	4.6		2	2	150 nM	85.902	169.53	281.05	2.23		3	6	150 nM	86.353	322.62	617.55	2.15
1	13	125 nM	90	113.5	321.75	4.86		2	2	150 nM	89.902	170.6	279.04	2.18		3	6	150 nM	90.35	328.39	606.75	2.47
1	13	125 nM	94	116.58	325.64	4.25		2	2	150 nM	93.906	173.5	275.59	2.65		3	6	150 nM	94.351	333.73	624.46	2.45
1	13	125 nM	98	117.62	328.98	4.5		2	2	150 nM	97.907	170.31	273.06	2.59		3	6	150 nM	98.353	324.78	636.26	2.48
1	14	125 nM	0	781.62	1002.55	10.02		2	3	150 nM	0	394.66	228.79	2.18		3	7	150 nM	0.071	1866.92	1472.73	2.29
1	14	125 nM	4	766.82	1009.99	9.71		2	3	150 nM	4.002	385.63	229.04	1.98		3	7	150 nM	4.074	1862.42	1459.67	2.2
1	14	125 nM	8	754.61	1021.47	10.42		2	3	150 nM	8.002	372.8	220.66	2.71		3	7	150 nM	8.073	1870.36	1476.18	2.42
1	14	125 nM	10	52.22	1004.11	9.46		2	3	150 nM	9.973	61.7	218.49	2.58		3	7	150 nM	10.404	104.74	1348.06	2.62
1	14	125 nM	14	127.99	1016.06	8.92		2	3	150 nM	13.914	114.78	222.45	2.71		3	7	150 nM	14.343	166.18	1451.24	2.36
1	14	125 nM	18	152.41	1022.52	9.22		2	3	150 nM	17.913	132.45	218.35	2.09		3	7	150 nM	18.343	196.59	1438.18	2.25
1	14	125 nM	22	161.17	1015.04	9.04		2	3	150 nM	21.913	138.32	218.42	2.4		3	7	150 nM	22.343	204.34	1388.37	2.48
1	14	125 nM	26	166.25	1029.86	9.11		2	3	150 nM	25.914	139.41	221.17	2.21		3	7	150 nM	26.344	217.22	1429.78	2.69
1	14	125 nM	30	170.19	1013.06	9.32		2	3	150 nM	29.914	145.87	222.58	2.28		3	7	150 nM	30.344	217.69	1396.87	2.27
1	14	125 nM	34	171.44	1023.16	8.84		2	3	150 nM	33.913	153.06	228.17	2.3		3	7	150 nM	34.345	233.26	1458.64	2.12
1	14	125 nM	38	169.97	1027.24	8.1		2	3	150 nM	37.913	149.92	228.12	1.79		3	7	150 nM	38.344	238.51	1414.8	2.31
1	14	125 nM	42	172.68	1024.96	9.48		2	3	150 nM	41.913	159.74	225.47	2.45		3	7	150 nM	42.339	243.08	1447.44	2.6
1	14	125 nM	46	173.07	1017.24	8.53		2	3	150 nM	45.911	163.3	223.28	2.22		3	7	150 nM	46.342	236.55	1394.88	2.59
1	14	125 nM	50	171.84	1016.25	8.3		2	3	150 nM	49.911	125.59	226.02	2.24		3	7	150 nM	50.344	238.08	1374.69	2.41
1	14	125 nM	54	175.78	1013.47	8		2	3	150 nM	53.914	153.82	225.51	2.13		3	7	150 nM	54.343	244.37	1420.3	2.03
1	14	125 nM	58	174.62	1018.01	8.31		2	3	150 nM	57.913	158.13	224.32	2.24		3	7	150 nM	58.344	234.71	1347.57	2.45
1	14	125 nM	62	176.39	1027.09	8.3		2	3	150 nM	61.913	169.28	226.54	2.1		3	7	150 nM	62.344	239.09	1423.86	2.6
1	14	125 nM	66	176.46	1024.86	9.09		2	3	150 nM	65.913	146.69	228.82	2.47		3	7	150 nM	66.343	231.39	1391.59	2.24
1	14	125 nM	70	175.93	1024.09	8.96		2	3	150 nM	69.914	139.91	226.72	1.98		3	7	150 nM	70.344	231.56	1406	2.4
1	14	125 nM	74	175.39	1016.81	8.57		2	3	150 nM	73.913	137.14	227.05	2.42		3	7	150 nM	74.343	226.08	1387.09	2.66
1	14	125 nM	78	175.47	1011.48	8.62		2	3	150 nM	77.913	145.1	232.2	2.21		3	7	150 nM	78.344	224.19	1432.56	2.64
1	14	125 nM	82	174.78	1019.55	7.98		2	3	150 nM	81.914	140.19	228.26	2.28		3	7	150 nM	82.344	227.65	1445.82	2.25
1	14	125 nM	86	175.59	1023.03	8.09		2	3	150 nM	85.912	145.37	226.66	1.85		3	7	150 nM	86.339	223.46	1422.19	2.09
1	14	125 nM	90	172	1025.38	8.14		2	3	150 nM	89.911	157.32	223.16	2.23		3	7	150 nM	90.344	222.07	1458.14	2.35
1	14	125 nM	94	171.11	1014.65	7.73		2	3	150 nM	93.914	156.77	229.29	2.7		3	7	150 nM	94.341	230.39	1390.94	2.34
1	14	125 nM	98	164.34	1029.03	8.16		2	3	150 nM	97.913	165.59	225.86	2.05		3	7	150 nM	98.345	229.3	1372.17	2.05
1	15	125 nM	0	1988.58	1066.35	2.63		2	4	150 nM	0	150.02	122.24	2.32		3	8	150 nM	0.076	826.45	759.18	2.69
1	15	125 nM	4	1956.9	1108.11	2.27		2	4	150 nM	4.001	130.59	121.82	2.11		3	8	150 nM	4.077	830.14	789.25	2.48
1	15	125 nM	8	1953.28	1086.66	2.2		2	4	150 nM	8.002	136.5	122.5	2.72		3	8	150 nM	8.079	836.28	791.35	2.36
1	15	125 nM	10	79.11	1047.33	2.22		2	4	150 nM	10.001	13.84	108.96	2.34		3	8	150 nM	10.409	211.44	785.14	2.77
1	15	125 nM	14	174.15	1062.19	2.32		2	4	150 nM	13.941	33.67	112.59	2.11		3	8	150 nM	14.349	275.98	804.43	2.2
1	15	125 nM	18	212.92	1069.94	2.48		2	4	150 nM	17.941	38.92	111.32	2.46		3	8	150 nM	18.352	291.83	819.5	2.55
1	15	125 nM	22	230.58	1089.78	2.34		2	4	150 nM	21.942	38.15	105.4	2.06		3	8	150 nM	22.353	293.23	811.17	2.59
1	15	125 nM	26	245.91	1108.96	2.42		2	4	150 nM	25.941	39.39	109.77	2.69		3	8	150 nM	26.352	309.28	809.93	2.29
1	15	125 nM	30	249.84	1154.35	2.35		2	4	150 nM	29.939	39.35	110.36	2.13		3	8	150 nM	30.352	330.06	808.55	2.39
1	15	125 nM	34	256.15	1179.1	2.2		2	4	150 nM	33.942	40.44	115.33	2.46		3	8	150 nM	34.352	334.15	787.37	2.3
1	15	125 nM	38	262.21	1178.14	2.51		2	4	150 nM	37.941	42	113.1	2.67		3	8	150 nM	38.351	374.31	781.69	2.24
1	15	125 nM	42	268.01	1069.09	3		2	4	150 nM	41.939	42.98	117.57	2.62		3	8	150 nM	42.352	361.78	768.52	2.25
1	15	125 nM	46	272.79	1143.59	2.36		2	4	150 nM	45.942	41.23	119.16	2.48		3	8	150 nM	46.351	348.66	772.9	1.67
1	15	125 nM	50	271.96	1187.39	2.52		2	4	150 nM	49.942	39.23	113.21	2.24		3	8	150 nM	50.353	336.43	766.39	2.4
1	15	125 nM	54	257.33	1169.7	2.49		2	4	150 nM	53.937	40.9	115.25	2.31		3	8	150 nM	54.352	330.17	746.43	2.02
1	15	125 nM	58	266.37	1170.35	3.06		2	4	150 nM	57.941	39.94	120.86	2.01		3	8	150 nM	58.353	335.58	734.15	2.24
1	15	125 nM	62	267.22	1159.79	2.28		2	4	150 nM	61.942	38.68	120.94	2.62		3	8	150 nM	62.353	333.91	768.66	2.82
1	15	125 nM	66	269.38	1157.44	2.4		2	4	150 nM	65.941	40.04	119.94	2.56		3	8	150 nM	66.349	328.87	730.68	2.51
1	15	125 nM	70	272.48	1073.68	2.79		2	4	150 nM	69.937	38.81	121.69	1.94		3	8	150 nM	70.353	297.93	749.46	2.57
1	15	125 nM	74	267.94	1165.76	2.55		2	4	150 nM	73.937	38.99	123.9	2.22		3	8	150 nM	74.347	311.26	725.6	2.22
1	15	125 nM	78	270.15	1154.09	2.45		2	4	150 nM	77.941	38.77	123.05	2.29		3	8	150 nM	78.352	319.04	730.73	2.54
1	15	125 nM	82	265.44	1159.3	2.13		2	4	150 nM	81.94	41.96	137.89	2.19		3	8	150 nM	82.351	317.01	715.77	2.38
1	15	125 nM	86	268.04	1115.94	2.94		2	4	150 nM	85.94	42.4	138.28	2.39		3	8	150 nM	86.353	308.86	714.42	2.21
1	15	125 nM	90	275.45	1081.82	2.57		2	4	150 nM	89.941	39.85	134.89	2.43		3	8	150 nM	90.353	311.8	713.96	2.67
1	15	125 nM	94	281.36	1067.11	2.28		2	4	150 nM	93.936	40.21	130.14	2.17		3	8	150 nM	94.352	307.72	725.74	2.38
1	15	125 nM	98	297.31	1074.13	2.68		2	4	150 nM	97.937	38.34	131.69	2.15		3	8	150 nM	98.353	310.97	709.41	2.25
1	16	125 nM	0	1121.47	347.61	2.16		2	5	150 nM	0	345.62	398.69	3.75		3	9	150 nM	0	1633.36	1207.6	2.14
1	16	125 nM	4	1115.57	354.04	2.09		2	5	150 nM	4	349.36	424.22	4.24		3	9	150 nM	4.003	1650.42	1194.94	2.07
1	16	125 nM	8	1152.96	302.9	2.18		2	5	150 nM	8.001	352.94	406.84	4.45		3	9	150 nM	8.003	1642.22	1175.3	2.53
1	16	125 nM	10	63.22	315.03	2.25		2	5	150 nM	9.978	40.44	359.24	4.16		3	9	150 nM	10.332	96.65	1112.06	2.46
1	16	125 nM	14	203.53	282.42	2.32		2	5	150 nM	13.918	107.28	357.33	3.81		3	9	150 nM	14.275	217.21	1131.8	2.63
1	16	125 nM	18	251.64	303.9	2.06		2	5	150 nM	17.919	126.44	374.53	4.1		3	9	150 nM	18.273	245.34	1144.87	1.95
1	16	125 nM	22	278.16	284.88	2.13		2	5	150 nM	21.918	136.02	390.22	3.33		3	9	150 nM	22.277	260	1147.23	2.3
1	16	125 nM	26	294.23	301.97	2.73		2	5	150 nM	25.918	139.37	379.43	3.74		3	9	150 nM	26.27	264.41	1143.4	2.28
1	16	125 nM	30	303.29	284.79	2.33		2	5	150 nM	29.919	142.29	386.98	3.89		3	9	150 nM	30.277	268.79	1151.09	2.57
1	16	125 nM	34	314.08	301.05	2.37		2	5	150 nM	33.919	142.53	359.62	3.52		3	9	150 nM	34.274	274.25	1158.45	2.36
1	16	125 nM	38	322.6	287.32	2.25		2	5	150 nM	37.92	146.61	364.95	3.97		3	9	150 nM	38.275	271.49	1153.87	2.54
1	16	125 nM	42	332	269.87	2.26		2	5	150 nM	41.919	147.35	385.66	3.94		3	9	150 nM	42.274	273.22	1148.53	2.63
1	16	125 nM	46	339.03	236.9	2		2	5	150 nM	45.919	147.77	378.84	3.91		3	9	150 nM	46.276	270.83	1152.56	2.35
1	16	125 nM	50	341.54	239.54	2.09		2	5	150 nM	49.919	147.5	370.07	3.45		3	9	150 nM	50.275	269.29	1140.13	2.73
1	16	125 nM	54	345.62	250.68	2.46		2	5	150 nM	53.918	151.08	404.48	4.21		3	9	150 nM	54.277	264.2	1108.38	2.52
1	16	125 nM	58	352.44	241.75	2.43		2	5	150 nM	57.919	148.6	419.29	3.4		3	9	150 nM	58.274	260.98	1115.91	2.07
1	16	125 nM	62	358.34	239.63	2.71		2	5	150 nM	61.918	147.53	418.91	3.34		3	9	150 nM	62.275	263.33	1114.52	2.24
1	16	125 nM	66	358.23	242.87	1.72		2	5	150 nM	65.918	147.11	420.91	3.35		3	9	150 nM	66.276	261.64	1119.7	2.18
1	16	125 nM	70	362.08	251.4	2.57		2	5	150 nM	69.919	149.97	427.35	3.98		3	9	150 nM	70.275	264.08	1109.05	2.38
1	16	125 nM	74	365.91	246.62	2.18		2	5	150 nM	73.916	150.34	399.84	3.91		3	9	150 nM	74.276	259.91	1100.92	2.25
1	16	125 nM	78	367.26	240.36	2.24		2	5	150 nM	77.92	150.31	363.21	4.4		3	9	150 nM	78.276	258.17	1090.04	2.12
1	16	125 nM	82	364.48	244.89	2.58		2	5	150 nM	81.919	147.29	362.67	4.73		3	9	150 nM	82.27	255.96	1125.5	2.35
1	16	125 nM	86	368	249.91	2.24		2	5	150 nM	85.919	153.73	365.49	4.81		3	9	150 nM	86.275	260.6	1125.65	2.56
1	16	125 nM	90	369.43	233.84	2.84		2	5	150 nM	89.919	154.59	365.77	4.83		3	9	150 nM	90.273	262.93	1153.6	2.08
1	16	125 nM	94	365.24	243.84	2.75		2	5	150 nM	93.919	154.92	364.82	4.58		3	9	150 nM	94.277	268.57	1128.5	2.3
1	16	125 nM	98	364.76	227.82	2.52		2	5	150 nM	97.919	156.21	372.46	3.91		3	9	150 nM	98.276	269.68	1118.31	2.2
1	17	125 nM	0	777.48	240.57	2.55		2	6	150 nM	0	323.37	249.93	2.28		3	10	150 nM	0	587.37	402.43	2.2
1	17	125 nM	4	765.13	243.95	2.23		2	6	150 nM	3.999	327.5	242.42	2.37		3	10	150 nM	4.003	641.42	399.87	2.15
1	17	125 nM	8	754.02	257.34	2.34		2	6	150 nM	7.999	329.42	251.42	2.14		3	10	150 nM	8	623.93	397.58	1.96
1	17	125 nM	10	38.94	224.85	2.38		2	6	150 nM	9.976	39.82	240.76	2.57		3	10	150 nM	10.331	180.88	375.49	2.08
1	17	125 nM	14	112.42	237.92	2.69		2	6	150 nM	13.913	97.12	232.71	2.11		3	10	150 nM	14.274	240.12	385.66	2.14
1	17	125 nM	18	144.91	248.15	1.99		2	6	150 nM	17.917	107.51	231.54	2.57		3	10	150 nM	18.27	255.2	392.47	2.57
1	17	125 nM	22	165.4	241.54	2.38		2	6	150 nM	21.917	115.78	244.52	1.91		3	10	150 nM	22.275	259.11	398.84	1.98
1	17	125 nM	26	173.86	251.03	2.36		2	6	150 nM	25.917	121.86	247.21	2.16		3	10	150 nM	26.271	255.88	389.99	2.59
1	17	125 nM	30	181.37	242.13	2.33		2	6	150 nM	29.917	116.89	222.93	2.36		3	10	150 nM	30.275	253.46	391.73	2.2
1	17	125 nM	34	182.12	242.27	2.28		2	6	150 nM	33.917	116.56	230.55	2.12		3	10	150 nM	34.274	252.92	393.57	2.34
1	17	125 nM	38	183.25	252.35	2.38		2	6	150 nM	37.915	115.65	238.23	2.65		3	10	150 nM	38.275	253.62	388.85	2.37
1	17	125 nM	42	183.22	250.53	1.95		2	6	150 nM	41.917	114.34	241.55	2.58		3	10	150 nM	42.274	268.32	390.33	2.28
1	17	125 nM	46	185.2	237.32	2.12		2	6	150 nM	45.917	112.7	244.39	2.14		3	10	150 nM	46.275	263.08	394.12	2.3
1	17	125 nM	50	184.4	252.53	2.25		2	6	150 nM	49.916	113.53	243.58	2.31		3	10	150 nM	50.272	258.68	393.08	2.67
1	17	125 nM	54	188.25	244.28	2.53		2	6	150 nM	53.912	117.93	252.34	1.96		3	10	150 nM	54.274	260.64	390.18	2.27
1	17	125 nM	58	185.42	247.95	2.38		2	6	150 nM	57.917	118.53	247.13	2.19		3	10	150 nM	58.274	286.73	397.68	2.28
1	17	125 nM	62	186.48	245.77	2.78		2	6	150 nM	61.912	119.72	261.94	3.11		3	10	150 nM	62.268	273.82	392.77	2.41
1	17	125 nM	66	182.82	251.35	2.42		2	6	150 nM	65.917	125.49	266.39	2.17		3	10	150 nM	66.27	280.74	393.67	2.28
1	17	125 nM	70	187.12	244.04	2.57		2	6	150 nM	69.917	125.02	259.51	2.03		3	10	150 nM	70.274	262.33	394.28	2.57
1	17	125 nM	74	186.82	234.74	2.28		2	6	150 nM	73.915	130.77	268.87	2.29		3	10	150 nM	74.275	274.57	393.47	2.45
1	17	125 nM	78	186.43	231.65	2.22		2	6	150 nM	77.917	126.34	258.64	2.22		3	10	150 nM	78.274	273.02	397.26	2.01
1	17	125 nM	82	187.3	227.82	2.58		2	6	150 nM	81.917	130.65	252.56	2.38		3	10	150 nM	82.273	272.52	390.4	2.41
1	17	125 nM	86	186.29	223.65	2.3		2	6	150 nM	85.917	128.11	253.6	2.39		3	10	150 nM	86.271	261.92	393.08	2.07
1	17	125 nM	90	187.12	231.21	2.27		2	6	150 nM	89.917	128.84	262.51	2.66		3	10	150 nM	90.275	256.24	384.61	2.3
1	17	125 nM	94	186.5	230.18	2.39		2	6	150 nM	93.917	133.28	262.29	2.13		3	10	150 nM	94.274	257.76	383.74	2.59
1	17	125 nM	98	184.31	240.81	2.51		2	6	150 nM	97.917	133.92	269.32	2.15		3	10	150 nM	98.275	283.03	390.07	2.37
1	18	125 nM	0	612.13	813.43	2.79		2	7	150 nM	0	336.84	100.22	2.23		3	11	150 nM	0	592.51	264.75	42.82
1	18	125 nM	4	613.31	804.01	3.45		2	7	150 nM	4.001	325.34	95.75	2.2		3	11	150 nM	4.003	612.37	271.36	43.72
1	18	125 nM	8	611.7	810.15	3.3		2	7	150 nM	8.003	320.61	98.55	2.06		3	11	150 nM	8.004	619	275.46	42.88
1	18	125 nM	10	48.96	786.79	3.35		2	7	150 nM	9.989	37.92	97.14	2.1		3	11	150 nM	10.375	117.3	248.92	43.7
1	18	125 nM	14	102.81	797.79	3.34		2	7	150 nM	13.928	86.09	100	2.1		3	11	150 nM	14.318	232.57	247.67	43.6
1	18	125 nM	18	120.05	812.9	3.51		2	7	150 nM	17.929	102.5	93.2	2.4		3	11	150 nM	18.317	271.44	248.65	42.88
1	18	125 nM	22	125.42	813.26	3.75		2	7	150 nM	21.927	103.28	98.29	2.42		3	11	150 nM	22.317	290.37	246.72	41.21
1	18	125 nM	26	128.8	810.62	3.62		2	7	150 nM	25.929	109.78	95.11	2.26		3	11	150 nM	26.32	302.68	249.13	41.68
1	18	125 nM	30	130.29	814.1	3.79		2	7	150 nM	29.928	107.4	95.95	2.48		3	11	150 nM	30.315	311.6	256.9	42.93
1	18	125 nM	34	130.38	814.19	3.07		2	7	150 nM	33.929	117.81	100.88	2.19		3	11	150 nM	34.318	311.95	259.92	44.64
1	18	125 nM	38	128.75	818.22	2.81		2	7	150 nM	37.929	117.32	103.43	2.37		3	11	150 nM	38.313	317.34	247.12	42.51
1	18	125 nM	42	132.01	814.12	3.19		2	7	150 nM	41.929	128.18	106.26	2.43		3	11	150 nM	42.319	314.41	246.41	43.06
1	18	125 nM	46	131.01	806.44	3.14		2	7	150 nM	45.929	127.11	102.91	1.85		3	11	150 nM	46.32	320.69	259.48	44.52
1	18	125 nM	50	133.02	798.98	3.39		2	7	150 nM	49.929	131.23	106.77	2.33		3	11	150 nM	50.317	313.65	260.31	43.88
1	18	125 nM	54	132.69	806.63	3.65		2	7	150 nM	53.928	133.93	105.61	2.47		3	11	150 nM	54.318	322.31	261.2	43.88
1	18	125 nM	58	129.03	803.93	3.92		2	7	150 nM	57.928	130.12	104.42	2.53		3	11	150 nM	58.318	314.95	247.5	42.93
1	18	125 nM	62	129.6	804.7	3.33		2	7	150 nM	61.929	128.08	99.36	2.38		3	11	150 nM	62.319	315.6	245.4	42.63
1	18	125 nM	66	127.88	807.98	3.55		2	7	150 nM	65.929	134.93	97.51	2.05		3	11	150 nM	66.317	325.29	246.47	45.16
1	18	125 nM	70	127.35	805.15	3.41		2	7	150 nM	69.929	136.41	96.58	2.06		3	11	150 nM	70.317	318.57	234.28	44.22
1	18	125 nM	74	127.99	798.88	3.63		2	7	150 nM	73.929	137.93	98.05	2.43		3	11	150 nM	74.318	327.31	263.36	47.01
1	18	125 nM	78	127.9	788.99	3.5		2	7	150 nM	77.929	140.05	97.58	2.15		3	11	150 nM	78.313	316.98	256.98	47.59
1	18	125 nM	82	127.13	789.75	3.32		2	7	150 nM	81.929	140.55	102.31	2.29		3	11	150 nM	82.318	306.43	243.92	44.85
1	18	125 nM	86	130.28	799.7	4.37		2	7	150 nM	85.929	145.96	102.71	2.34		3	11	150 nM	86.313	296.73	212.06	39.87
1	18	125 nM	90	128.94	794.62	3.55		2	7	150 nM	89.927	139.66	96.77	2.19		3	11	150 nM	90.318	334.51	240.74	44.8
1	18	125 nM	94	128.74	803.94	3.61		2	7	150 nM	93.929	144.85	89.33	2.33		3	11	150 nM	94.318	329.71	238.87	44.85
1	18	125 nM	98	128.6	803.08	3.86		2	7	150 nM	97.927	150.22	90.13	2.25		3	11	150 nM	98.318	319.36	235.37	42.95
1	19	125 nM	0	1553.57	1519.91	2.25		2	8	150 nM	0	340.57	122.17	10.14		3	12	150 nM	0	954.02	387.38	2.09
1	19	125 nM	4	1559.61	1508.6	2.79		2	8	150 nM	3.997	334.19	124.39	10.24		3	12	150 nM	3.998	948.16	411.26	2.35
1	19	125 nM	8	1546.22	1486.76	2.3		2	8	150 nM	7.999	322.05	126.39	10.05		3	12	150 nM	7.998	978.45	382.55	2.35
1	19	125 nM	10	85.74	1429	2.53		2	8	150 nM	9.973	38.11	122.99	9.09		3	12	150 nM	10.328	132.97	315.41	2.71
1	19	125 nM	14	198.25	1479.47	2.23		2	8	150 nM	13.914	74.08	124.63	9.86		3	12	150 nM	14.272	329.81	323.73	2.44
1	19	125 nM	18	232.25	1505.46	2.81		2	8	150 nM	17.915	82.06	122.94	9.45		3	12	150 nM	18.271	371.36	296.53	2.47
1	19	125 nM	22	250.98	1493.34	2.66		2	8	150 nM	21.913	84.06	123.68	9.34		3	12	150 nM	22.272	413.8	332.37	2.4
1	19	125 nM	26	264.59	1471.22	2.55		2	8	150 nM	25.914	85.31	126.44	8.45		3	12	150 nM	26.271	420.49	348.57	2.06
1	19	125 nM	30	271.01	1481.38	2.42		2	8	150 nM	29.913	83.62	126.74	8.73		3	12	150 nM	30.272	430.51	284.71	2.32
1	19	125 nM	34	277.04	1468.59	2.44		2	8	150 nM	33.914	84.26	124.26	8.4		3	12	150 nM	34.271	443.12	309.43	2.1
1	19	125 nM	38	281.4	1493.79	2.46		2	8	150 nM	37.914	89.11	124.18	9.4		3	12	150 nM	38.272	451.03	360.2	2.44
1	19	125 nM	42	285.84	1479.96	2.04		2	8	150 nM	41.914	90.17	126.86	10.27		3	12	150 nM	42.267	446.89	372.2	2.27
1	19	125 nM	46	288.57	1493.72	2.53		2	8	150 nM	45.914	92.49	126.32	10.13		3	12	150 nM	46.271	447.82	395.99	2.55
1	19	125 nM	50	289.33	1486.51	2.46		2	8	150 nM	49.915	93.45	125.12	9.3		3	12	150 nM	50.271	449.81	381.26	2.39
1	19	125 nM	54	289.75	1494	2.03		2	8	150 nM	53.912	90.91	125.92	7.97		3	12	150 nM	54.271	456.52	380.86	2.32
1	19	125 nM	58	292.92	1487.91	2.82		2	8	150 nM	57.912	93.31	125.66	8.64		3	12	150 nM	58.27	457.35	379.75	2.43
1	19	125 nM	62	290.18	1509.94	2.41		2	8	150 nM	61.913	94.63	124	9.18		3	12	150 nM	62.271	458.88	387.79	2.31
1	19	125 nM	66	291.74	1452.17	2.41		2	8	150 nM	65.914	93.86	125.2	9.56		3	12	150 nM	66.272	460.95	382.15	2.89
1	19	125 nM	70	293.56	1458.97	2.56		2	8	150 nM	69.915	96.15	126.8	10.28		3	12	150 nM	70.273	459.83	386.29	2.72
1	19	125 nM	74	295.11	1461.11	2.48		2	8	150 nM	73.915	97.73	125.64	10.74		3	12	150 nM	74.271	461.02	385.71	2.22
1	19	125 nM	78	292.28	1465.52	2.61		2	8	150 nM	77.914	96.74	124.87	10.13		3	12	150 nM	78.272	477.07	403.62	3.12
1	19	125 nM	82	299.61	1477.52	2.52		2	8	150 nM	81.914	95.61	124.3	10.37		3	12	150 nM	82.271	458.54	404.71	2.68
1	19	125 nM	86	302.26	1483.03	2.62		2	8	150 nM	85.915	96.37	124.65	11.04		3	12	150 nM	86.266	416.52	398.95	2.41
1	19	125 nM	90	303.7	1491.45	2.35		2	8	150 nM	89.915	98.27	126.08	11.2		3	12	150 nM	90.272	324.8	394.96	2.53
1	19	125 nM	94	304.94	1508.8	2.63		2	8	150 nM	93.914	99.94	123.4	11.06		3	12	150 nM	94.273	309.32	396.77	2.46
1	19	125 nM	98	305.5	1487.06	2.32		2	8	150 nM	97.914	100.05	126.28	10.87		3	12	150 nM	98.272	277.19	387.04	2.52
1	20	125 nM	0	482.06	168.42	2.85		2	9	150 nM	0	658.53	1063.29	2.17		3	1	167 nM	0	2538.87	333.85	2.53
1	20	125 nM	4	481.47	164.38	2.76		2	9	150 nM	4	669.39	1020.25	1.91		3	1	167 nM	4.001	2537.34	335.05	2.19
1	20	125 nM	8	480.05	165.04	2.93		2	9	150 nM	8.001	685.27	1019.43	2.56		3	1	167 nM	8	2541.14	345.64	2.34
1	20	125 nM	10	55.45	162.77	2.88		2	9	150 nM	10.01	16.73	1063.93	2.01		3	1	167 nM	10.331	109.68	339.53	2.45
1	20	125 nM	14	75.31	163.07	2.41		2	9	150 nM	13.95	71.33	1054.78	2.16		3	1	167 nM	14.274	201.04	343.82	2.46
1	20	125 nM	18	79.98	164.81	2.84		2	9	150 nM	17.945	93.32	1012.88	2.5		3	1	167 nM	18.274	234.5	312.93	2.37
1	20	125 nM	22	82.2	165.16	3.11		2	9	150 nM	21.95	102.34	1038.25	1.93		3	1	167 nM	22.275	262.76	317.24	2.27
1	20	125 nM	26	82.14	163.45	3.05		2	9	150 nM	25.95	106.43	1025.26	2.39		3	1	167 nM	26.274	292.49	355.05	2.64
1	20	125 nM	30	81.31	161.27	2.82		2	9	150 nM	29.95	114.31	1055.96	2.18		3	1	167 nM	30.274	298.68	359.95	2.35
1	20	125 nM	34	83.38	161.66	3.26		2	9	150 nM	33.95	118.27	1069.64	2.18		3	1	167 nM	34.275	323.58	352.96	2.22
1	20	125 nM	38	81.58	161.57	3.02		2	9	150 nM	37.948	122.73	1070.4	2.27		3	1	167 nM	38.274	339.03	372.84	2.54
1	20	125 nM	42	81.62	158.85	2.91		2	9	150 nM	41.95	124.15	1099.03	2.65		3	1	167 nM	42.273	330.51	352.29	3.04
1	20	125 nM	46	81.79	154.46	3.13		2	9	150 nM	45.95	124.24	1089.45	2.59		3	1	167 nM	46.274	319.85	344.57	2.43
1	20	125 nM	50	80.79	152.75	2.47		2	9	150 nM	49.95	121.59	1076.41	2.28		3	1	167 nM	50.273	318.59	356.31	2.34
1	20	125 nM	54	81.84	153.06	2.71		2	9	150 nM	53.948	118.69	1102.74	2.46		3	1	167 nM	54.273	314.76	323.07	2.66
1	20	125 nM	58	80.48	154.14	2.73		2	9	150 nM	57.95	120.09	1086.61	2.24		3	1	167 nM	58.274	317.82	357.53	2.61
1	20	125 nM	62	81.84	152.92	2.38		2	9	150 nM	61.945	119.95	1090.01	2.21		3	1	167 nM	62.274	317.27	362.24	2.33
1	20	125 nM	66	83.24	153.81	2.68		2	9	150 nM	65.948	119.26	1090.62	2.32		3	1	167 nM	66.274	318.35	360.77	2.26
1	20	125 nM	70	82.39	148.3	2.44		2	9	150 nM	69.947	120.87	1075.21	2.36		3	1	167 nM	70.273	324.99	359.39	2.49
1	20	125 nM	74	83.79	151.4	2.66		2	9	150 nM	73.95	124.55	1042.28	2.33		3	1	167 nM	74.274	319.06	343.46	2.1
1	20	125 nM	78	82.88	148.93	2.83		2	9	150 nM	77.95	126.19	1069.85	2.5		3	1	167 nM	78.269	311.97	342.44	2.18
1	20	125 nM	82	83.72	149.31	2.35		2	9	150 nM	81.949	124.89	1061.49	2.36		3	1	167 nM	82.274	318.57	346.3	2.32
1	20	125 nM	86	84.02	143.72	2.56		2	9	150 nM	85.95	122.53	1098.53	2.61		3	1	167 nM	86.27	322.27	363.87	1.93
1	20	125 nM	90	82.29	134.33	2.1		2	9	150 nM	89.95	118.72	1110.7	2.56		3	1	167 nM	90.275	320.77	350.76	1.97
1	20	125 nM	94	82.05	137.6	2.37		2	9	150 nM	93.95	119.89	1093.37	2.16		3	1	167 nM	94.273	324.76	359.54	2.6
1	20	125 nM	98	82.51	129.62	2.47		2	9	150 nM	97.949	122.81	1094.25	2.51		3	1	167 nM	98.276	330.29	361.94	2.18
1	21	125 nM	0	113.18	39.94	2.48		2	10	150 nM	0	802.44	1032.77	12.88		3	2	167 nM	0	1048.44	1748.68	6.62
1	21	125 nM	4	120.06	39.45	2.39		2	10	150 nM	4.001	786.48	1000.46	11.69		3	2	167 nM	4.003	1094.88	1729.58	6.13
1	21	125 nM	8	122	40.77	2.9		2	10	150 nM	8.001	796.14	996.06	11.11		3	2	167 nM	8.002	1199.93	1765.62	6.96
1	21	125 nM	10	25.72	37.67	2.34		2	10	150 nM	9.968	83.38	957.42	10.63		3	2	167 nM	10.337	72.4	1702.07	6.25
1	21	125 nM	14	43.73	37.62	2.95		2	10	150 nM	13.905	181.79	981.58	10.12		3	2	167 nM	14.28	175.49	1682.63	6.29
1	21	125 nM	18	46.55	37.15	2.64		2	10	150 nM	17.902	218.94	1000.61	11.64		3	2	167 nM	18.279	204.05	1665.45	5.75
1	21	125 nM	22	49.29	37.42	2.91		2	10	150 nM	21.908	238.02	965.51	10.68		3	2	167 nM	22.281	217.18	1675.56	5.88
1	21	125 nM	26	49.41	36.39	2.47		2	10	150 nM	25.908	256.29	949.46	9.64		3	2	167 nM	26.282	226.63	1679.67	6.06
1	21	125 nM	30	48.72	36.5	2.41		2	10	150 nM	29.909	268.27	971.97	11.13		3	2	167 nM	30.282	238.86	1667.07	5.47
1	21	125 nM	34	49.28	36.52	2.44		2	10	150 nM	33.904	277.66	981.09	11.01		3	2	167 nM	34.28	228.6	1662.28	5.99
1	21	125 nM	38	51.31	37.81	2.79		2	10	150 nM	37.904	279.64	984.99	9.99		3	2	167 nM	38.281	225.65	1676.85	5.54
1	21	125 nM	42	51.27	36.71	2.4		2	10	150 nM	41.908	287.08	990.75	10.16		3	2	167 nM	42.28	224.46	1669.29	6.02
1	21	125 nM	46	52.91	36	2.42		2	10	150 nM	45.908	294.49	1004.91	9.89		3	2	167 nM	46.279	237.39	1658.86	5.82
1	21	125 nM	50	52.45	36.42	2.65		2	10	150 nM	49.908	292.62	1003.09	9.3		3	2	167 nM	50.276	232.12	1666.84	5.7
1	21	125 nM	54	52.31	36.55	2.39		2	10	150 nM	53.906	300.95	1019.37	11.46		3	2	167 nM	54.281	234.1	1675.2	6.39
1	21	125 nM	58	54.29	38.26	2.72		2	10	150 nM	57.909	302.71	988.98	10.22		3	2	167 nM	58.281	247.1	1677.19	6.11
1	21	125 nM	62	52.44	36.62	2.38		2	10	150 nM	61.908	304.37	998.96	10.63		3	2	167 nM	62.276	255.27	1647.48	5.39
1	21	125 nM	66	52.31	37.19	2.26		2	10	150 nM	65.906	303.96	997.81	11.03		3	2	167 nM	66.281	264.62	1630.09	5.55
1	21	125 nM	70	53.35	36.94	2.68		2	10	150 nM	69.909	312.64	983.42	11.74		3	2	167 nM	70.282	263.5	1645.71	5.99
1	21	125 nM	74	53.03	36.95	2.63		2	10	150 nM	73.908	315.2	1005.46	11.45		3	2	167 nM	74.281	269.48	1609.27	5.89
1	21	125 nM	78	55.02	37.41	2.61		2	10	150 nM	77.908	304.25	978.64	10.6		3	2	167 nM	78.276	285.37	1630.5	7.05
1	21	125 nM	82	53.88	37.56	2.83		2	10	150 nM	81.908	300.19	974.88	10.59		3	2	167 nM	82.281	272.88	1629.42	6.12
1	21	125 nM	86	52.09	36.52	2.13		2	10	150 nM	85.908	293.13	950.3	9.02		3	2	167 nM	86.28	267.14	1598.02	6.35
1	21	125 nM	90	52.16	37.09	2.37		2	10	150 nM	89.908	296.44	975.66	10.5		3	2	167 nM	90.28	280.01	1540.69	5.87
1	21	125 nM	94	53.55	36.26	2.57		2	10	150 nM	93.908	296.35	996.03	9.88		3	2	167 nM	94.279	276.59	1570.35	6.1
1	21	125 nM	98	52.32	36.57	2.51		2	10	150 nM	97.909	300.42	950.97	10.51		3	2	167 nM	98.276	275.66	1551.47	5.69
1	22	125 nM	0	799.27	433.2	2.15		2	11	150 nM	0	727.53	269	2.39		3	3	167 nM	0	1222.47	1205.97	12.38
1	22	125 nM	4	815.37	434.76	1.99		2	11	150 nM	4	822.5	257.38	2.21		3	3	167 nM	4.002	1083.93	1241.24	11.92
1	22	125 nM	8	752.46	436.29	2.2		2	11	150 nM	7.999	793.51	248.78	2.67		3	3	167 nM	8.001	1077.6	1151.86	11.04
1	22	125 nM	10	34.14	407.29	2.12		2	11	150 nM	9.966	51.86	236.56	2.39		3	3	167 nM	10.325	52.81	1150.49	10.8
1	22	125 nM	14	82.01	418.24	2.15		2	11	150 nM	13.906	172.44	234.71	2.4		3	3	167 nM	14.269	123.45	1187.49	9.38
1	22	125 nM	18	105.57	403.43	2.57		2	11	150 nM	17.906	198.48	249.39	2.49		3	3	167 nM	18.269	144.58	1163.01	9.47
1	22	125 nM	22	110.08	394.23	2.34		2	11	150 nM	21.904	214.25	247.28	2.09		3	3	167 nM	22.269	157.41	1198.89	8.93
1	22	125 nM	26	118.57	407.23	2.47		2	11	150 nM	25.904	223.63	245.64	2.53		3	3	167 nM	26.27	165.48	1167.93	8.72
1	22	125 nM	30	124.24	414.28	2.93		2	11	150 nM	29.906	235.99	236.52	2.38		3	3	167 nM	30.269	183.39	1259.19	9.51
1	22	125 nM	34	124.15	419.66	2.43		2	11	150 nM	33.906	226.41	250.17	2.4		3	3	167 nM	34.27	191.2	1232.37	8.65
1	22	125 nM	38	115.11	384.01	2.19		2	11	150 nM	37.906	225.78	253.97	2.59		3	3	167 nM	38.268	191.24	1103.33	9.37
1	22	125 nM	42	115.25	400.06	2.27		2	11	150 nM	41.906	223.96	263.5	2.54		3	3	167 nM	42.269	196.73	1157.62	9.09
1	22	125 nM	46	110.95	401.09	2.28		2	11	150 nM	45.906	235.79	241.22	2.05		3	3	167 nM	46.268	209.56	1141.6	8.73
1	22	125 nM	50	117.76	409.71	2.51		2	11	150 nM	49.906	235.42	242.37	2.52		3	3	167 nM	50.269	197.22	1080.12	8.45
1	22	125 nM	54	115.87	390.02	2.02		2	11	150 nM	53.905	247.06	235.84	2.28		3	3	167 nM	54.27	200.12	1097.6	7.75
1	22	125 nM	58	115.45	397.72	2.16		2	11	150 nM	57.904	234.04	246.08	2.31		3	3	167 nM	58.27	179.25	925.27	8.49
1	22	125 nM	62	113.38	392.01	2.28		2	11	150 nM	61.906	235.16	247.82	2.14		3	3	167 nM	62.265	200.52	1242.44	7.71
1	22	125 nM	66	106.56	400.14	1.83		2	11	150 nM	65.906	234.16	256	2.52		3	3	167 nM	66.27	189.18	1144.68	6.68
1	22	125 nM	70	102.29	394.28	2.45		2	11	150 nM	69.906	244.04	244.52	2.5		3	3	167 nM	70.269	212.19	1344.43	8.17
1	22	125 nM	74	106.74	407.13	2.42		2	11	150 nM	73.906	246.41	246.96	2.22		3	3	167 nM	74.27	206.8	1304.22	7.75
1	22	125 nM	78	113.99	409.73	2.31		2	11	150 nM	77.906	241.03	244.99	2.26		3	3	167 nM	78.268	218.4	1356.55	8.13
1	22	125 nM	82	120.78	407.54	2.4		2	11	150 nM	81.903	247.17	245.25	2.57		3	3	167 nM	82.269	215.75	1378.01	7.42
1	22	125 nM	86	124.84	406.56	2.24		2	11	150 nM	85.905	235.4	262.18	2.16		3	3	167 nM	86.268	206.99	1285.62	7.52
1	22	125 nM	90	128.29	420.35	2.21		2	11	150 nM	89.902	233.24	264.64	2.18		3	3	167 nM	90.27	222.55	1372.89	8.23
1	22	125 nM	94	124.77	411.55	2.15		2	11	150 nM	93.901	239.09	261.89	2.32		3	3	167 nM	94.271	207.76	1267.02	9.51
1	22	125 nM	98	121.34	414.69	2.27		2	11	150 nM	97.906	243.19	263.42	2.15		3	3	167 nM	98.27	214.31	1341.99	8.89
1	23	125 nM	0	272.61	60.12	3.38		2	12	150 nM	0	872.95	2024.9	2.75		3	4	167 nM	0	1824.68	1274.55	3
1	23	125 nM	4	291.68	60.09	3.4		2	12	150 nM	4	862.43	2077.34	2.29		3	4	167 nM	4.001	1809.73	1226.51	2.59
1	23	125 nM	8	289.55	59.55	3.68		2	12	150 nM	8	866.9	2057.78	2.22		3	4	167 nM	8	1806.65	1262.17	2.64
1	23	125 nM	10	32.55	57.66	3.22		2	12	150 nM	9.968	38.84	1984.96	2.32		3	4	167 nM	10.328	60.89	1216.78	2.88
1	23	125 nM	14	88.61	57.61	3.74		2	12	150 nM	13.903	164.2	2013.81	2.68		3	4	167 nM	14.271	184.57	1193.94	2.76
1	23	125 nM	18	97.5	57.81	3.25		2	12	150 nM	17.908	213.8	2017.01	2.29		3	4	167 nM	18.271	230.15	1187.33	2.48
1	23	125 nM	22	103.16	57.54	3.32		2	12	150 nM	21.907	241.44	1995.9	2.06		3	4	167 nM	22.271	255.7	1252.14	2.44
1	23	125 nM	26	102.95	57.36	3.27		2	12	150 nM	25.908	259.78	1966.84	2.21		3	4	167 nM	26.266	268.69	1230.89	2.57
1	23	125 nM	30	104.34	57.98	3.07		2	12	150 nM	29.907	273.73	1995.98	2.66		3	4	167 nM	30.271	278.68	1283.07	2.61
1	23	125 nM	34	104.27	57.48	4.18		2	12	150 nM	33.903	278.93	2009.31	2.37		3	4	167 nM	34.27	284.7	1219.25	2.67
1	23	125 nM	38	104.79	56.64	3.87		2	12	150 nM	37.902	282.98	2006.84	2.11		3	4	167 nM	38.271	292.47	1306.79	2.69
1	23	125 nM	42	105.94	55.81	4.24		2	12	150 nM	41.905	287.43	2028.58	2.4		3	4	167 nM	42.266	297.22	1396.6	2.79
1	23	125 nM	46	105.91	55.27	3.45		2	12	150 nM	45.908	288.37	2025.47	2.55		3	4	167 nM	46.271	296.8	1371.47	2.95
1	23	125 nM	50	108.07	56.09	3.59		2	12	150 nM	49.907	286.8	2038.27	2.14		3	4	167 nM	50.271	302.03	1450.15	2.42
1	23	125 nM	54	106.73	57.16	3.78		2	12	150 nM	53.905	290.49	2007.39	2.53		3	4	167 nM	54.271	303.57	1427.4	2.29
1	23	125 nM	58	106.73	57.57	4.08		2	12	150 nM	57.908	288.82	2016.75	2.2		3	4	167 nM	58.268	300.27	1376.01	2.8
1	23	125 nM	62	107.12	57.52	3.76		2	12	150 nM	61.907	291.23	1982.31	2.53		3	4	167 nM	62.273	300.09	1397.65	2.41
1	23	125 nM	66	107.18	57.18	3.88		2	12	150 nM	65.907	293.26	1907.35	2.35		3	4	167 nM	66.272	301.2	1383.68	2.74
1	23	125 nM	70	107.22	54.77	3.86		2	12	150 nM	69.907	297.17	1903.74	2.4		3	4	167 nM	70.267	303.71	1354.69	2.66
1	23	125 nM	74	109.54	55.82	4.24		2	12	150 nM	73.901	296.86	1923.68	2.46		3	4	167 nM	74.27	307.33	1364.2	2.5
1	23	125 nM	78	108.73	57.97	4.35		2	12	150 nM	77.906	296.63	1896.14	2.29		3	4	167 nM	78.267	308.14	1406.77	2.62
1	23	125 nM	82	107.81	56.13	4.1		2	12	150 nM	81.906	293.37	1836.94	2.13		3	4	167 nM	82.271	311.25	1378.55	2.34
1	23	125 nM	86	104.73	54.33	3.81		2	12	150 nM	85.904	282.88	1761.63	2.3		3	4	167 nM	86.271	311.44	1403.4	2.41
1	23	125 nM	90	105.87	54.05	4.01		2	12	150 nM	89.907	285.1	1742.94	2.45		3	4	167 nM	90.27	312.19	1400.72	2.44
1	23	125 nM	94	108.22	53.36	3.52		2	12	150 nM	93.907	276.6	1665.39	2.26		3	4	167 nM	94.272	312.46	1370.12	2.63
1	23	125 nM	98	108.92	52.91	3.44		2	12	150 nM	97.908	277.65	1740.44	2.46		3	4	167 nM	98.271	315.63	1349.02	2.6
1	24	125 nM	0	303.93	172.7	4.74		2	13	150 nM	0	925.72	770.94	2.11		3	5	167 nM	0	1989.33	2382.79	2.07
1	24	125 nM	4	306.24	179.15	5.6		2	13	150 nM	3.999	930.4	776.37	2.79		3	5	167 nM	3.999	2024.36	2328.02	2.63
1	24	125 nM	8	302.25	171.5	5.35		2	13	150 nM	8	930.79	775.76	2.8		3	5	167 nM	7.998	2010.41	2325.97	2.18
1	24	125 nM	10	25.83	175.44	4.59		2	13	150 nM	10.01	63.56	739.05	1.9		3	5	167 nM	10.327	88.98	2220.22	2.6
1	24	125 nM	14	104.08	177.22	4.74		2	13	150 nM	13.949	169.86	752	2.03		3	5	167 nM	14.268	191.64	2306.8	2.58
1	24	125 nM	18	128.64	171.51	5.28		2	13	150 nM	17.95	213.46	762.68	2.57		3	5	167 nM	18.269	222.06	2276.25	1.85
1	24	125 nM	22	138.21	174.5	4.71		2	13	150 nM	21.95	230.5	760.58	2.18		3	5	167 nM	22.269	240.95	2281.23	2.48
1	24	125 nM	26	139.62	170.7	5.05		2	13	150 nM	25.95	245.47	767.63	2.02		3	5	167 nM	26.265	248.94	2318.45	2.32
1	24	125 nM	30	141.5	166.92	5.22		2	13	150 nM	29.949	252.24	770.4	2.4		3	5	167 nM	30.268	259.67	2290.29	2.8
1	24	125 nM	34	143.06	170.24	4.96		2	13	150 nM	33.946	257.2	775.71	2.54		3	5	167 nM	34.27	263.79	2270.43	2.32
1	24	125 nM	38	145.24	173.12	4.98		2	13	150 nM	37.949	259.49	776.09	2.51		3	5	167 nM	38.267	267.98	2298.32	2.16
1	24	125 nM	42	146.23	187.66	4.53		2	13	150 nM	41.945	263.05	759.7	2.18		3	5	167 nM	42.268	272.45	2244.86	2.56
1	24	125 nM	46	146.12	172.4	5.07		2	13	150 nM	45.95	263.82	762.84	1.96		3	5	167 nM	46.269	273.82	2294.43	2.67
1	24	125 nM	50	146.18	169.41	4.84		2	13	150 nM	49.95	265.37	767.19	2.37		3	5	167 nM	50.268	275.25	2271.84	2.54
1	24	125 nM	54	148.21	175.06	5.06		2	13	150 nM	53.95	263.72	762	2		3	5	167 nM	54.269	275.49	2292.22	2.75
1	24	125 nM	58	148.17	174.79	5.18		2	13	150 nM	57.948	267.11	768.93	2.37		3	5	167 nM	58.269	279.93	2290.27	2.1
1	24	125 nM	62	149.05	175.74	5.05		2	13	150 nM	61.948	270.32	764.44	2.43		3	5	167 nM	62.27	278.86	2245.73	2.25
1	24	125 nM	66	149.25	172.39	5.09		2	13	150 nM	65.95	264.68	765.96	2.11		3	5	167 nM	66.269	280.51	2284.86	2.43
1	24	125 nM	70	152.52	175.85	5.31		2	13	150 nM	69.949	264.02	768.48	2.29		3	5	167 nM	70.268	281.71	2289.69	2.71
1	24	125 nM	74	149.25	181.03	4.9		2	13	150 nM	73.95	261.97	739.47	2.26		3	5	167 nM	74.269	286.26	2208.5	2.34
1	24	125 nM	78	150.7	182.02	5.74		2	13	150 nM	77.95	266.35	768.25	2.91		3	5	167 nM	78.268	287.36	2255.35	2.72
1	24	125 nM	82	150.92	182.48	4.64		2	13	150 nM	81.95	262.4	757.25	2.29		3	5	167 nM	82.267	290.69	2210.6	2.49
1	24	125 nM	86	150.77	183.81	4.75		2	13	150 nM	85.95	263.07	759.33	2.16		3	5	167 nM	86.264	290.15	2203.55	2.45
1	24	125 nM	90	152.35	173.45	5.57		2	13	150 nM	89.948	267.16	754.65	2.42		3	5	167 nM	90.269	287.18	2224.13	2.2
1	24	125 nM	94	152.35	182.66	5		2	13	150 nM	93.95	260.54	761.51	2.39		3	5	167 nM	94.269	289.18	2261.36	2.46
1	24	125 nM	98	153.66	188.64	5.36		2	13	150 nM	97.949	254.92	753.71	2.22		3	5	167 nM	98.264	290.06	2247.84	2.03
1	25	125 nM	0	207.56	41.25	2.15		2	1	167 nM	0.078	698.11	530.86	2.33		3	6	167 nM	0	1615.34	724.3	2.4
1	25	125 nM	4	191.35	41.99	2.9		2	1	167 nM	4.076	703.11	571.37	2.66		3	6	167 nM	4.002	1665.34	766.84	2.04
1	25	125 nM	8	201.38	40.01	2.46		2	1	167 nM	8.078	697.29	565.65	2.12		3	6	167 nM	8.002	1584.68	763.4	2.38
1	25	125 nM	10	21.11	42.81	2.27		2	1	167 nM	10.048	47.64	532.32	2.43		3	6	167 nM	10.353	159.25	738.7	2.23
1	25	125 nM	14	39.19	38.62	2.36		2	1	167 nM	13.99	140.32	486.88	2.58		3	6	167 nM	14.295	341.43	716.06	2.31
1	25	125 nM	18	43.51	41.53	2.37		2	1	167 nM	17.99	167.6	477.04	2.57		3	6	167 nM	18.296	393.73	736.63	2.48
1	25	125 nM	22	42.79	38.54	2.17		2	1	167 nM	21.989	176.97	542.59	2.08		3	6	167 nM	22.296	403.52	740.3	1.89
1	25	125 nM	26	42.77	36.77	2.24		2	1	167 nM	25.988	183.33	525.86	2.42		3	6	167 nM	26.295	453.16	754.49	2.73
1	25	125 nM	30	43.49	36.42	2.35		2	1	167 nM	29.99	187.14	489.34	2.81		3	6	167 nM	30.296	460.92	710.65	2.29
1	25	125 nM	34	42.73	38.07	1.89		2	1	167 nM	33.988	186.52	442.06	2.28		3	6	167 nM	34.295	482.7	691.11	2.2
1	25	125 nM	38	42.84	36.99	1.74		2	1	167 nM	37.99	186.25	476.41	2.83		3	6	167 nM	38.297	503.98	729.33	2.32
1	25	125 nM	42	46.76	41.27	2.24		2	1	167 nM	41.99	182.94	460.79	2.7		3	6	167 nM	42.295	488.95	753.85	2.6
1	25	125 nM	46	46.88	40.46	2.8		2	1	167 nM	45.989	181.8	461.64	2.54		3	6	167 nM	46.29	494.96	706.48	2.59
1	25	125 nM	50	45.8	42.73	2.26		2	1	167 nM	49.988	182.68	472.76	2.29		3	6	167 nM	50.296	479.7	725.41	2.24
1	25	125 nM	54	44.87	41.49	2.59		2	1	167 nM	53.99	181.69	464.61	2.69		3	6	167 nM	54.295	466.16	693.15	2.35
1	25	125 nM	58	44.62	41.7	2.34		2	1	167 nM	57.989	175.84	484.38	2.27		3	6	167 nM	58.297	457.06	700.83	1.99
1	25	125 nM	62	47.19	41.49	2.81		2	1	167 nM	61.988	177.92	497.22	2.51		3	6	167 nM	62.296	488.46	672.1	2.06
1	25	125 nM	66	45.44	43.26	2.1		2	1	167 nM	65.989	174.5	513.15	2.45		3	6	167 nM	66.296	521.59	722.24	2.64
1	25	125 nM	70	46.21	41.43	2.15		2	1	167 nM	69.99	179.44	477.03	2.24		3	6	167 nM	70.298	488.52	704.27	2.43
1	25	125 nM	74	48.03	42.2	2.52		2	1	167 nM	73.989	175.44	484.86	2.89		3	6	167 nM	74.296	487.45	732.56	2.23
1	25	125 nM	78	45.54	41.43	2.8		2	1	167 nM	77.988	176.74	480.52	2.34		3	6	167 nM	78.296	486.51	723.98	2.2
1	25	125 nM	82	44.05	41.39	2.38		2	1	167 nM	81.99	171.77	510.83	2.2		3	6	167 nM	82.297	477.63	740.18	2.64
1	25	125 nM	86	43.63	39.23	2.76		2	1	167 nM	85.987	169.54	521.77	2.51		3	6	167 nM	86.295	464.76	711.68	2.02
1	25	125 nM	90	43.31	37.8	2.43		2	1	167 nM	89.989	169.48	529.8	2.07		3	6	167 nM	90.294	490.63	715.78	2.49
1	25	125 nM	94	43.37	39.91	2.08		2	1	167 nM	93.988	171.12	474.29	2.48		3	6	167 nM	94.296	496.4	714.3	2.23
1	25	125 nM	98	44.82	39.13	2.5		2	1	167 nM	97.99	167.69	413.49	2.33		3	6	167 nM	98.296	511.15	736.02	2.62
1	26	125 nM	0	840.92	378.8	2.12		2	2	167 nM	0.078	636.68	740.33	4.31		3	7	167 nM	0	1638.63	3088.69	2.38
1	26	125 nM	4	835.86	360.27	2.34		2	2	167 nM	4.077	637.47	739.66	4.8		3	7	167 nM	4.003	1635.23	3075.1	2.58
1	26	125 nM	8	842.57	386.72	2.12		2	2	167 nM	8.078	617.56	733.81	4.33		3	7	167 nM	8.002	1578.72	3078.71	3.14
1	26	125 nM	10	34.64	385.83	2.46		2	2	167 nM	10.043	51.25	713.22	4.11		3	7	167 nM	10.331	57.57	2993.41	2.58
1	26	125 nM	14	109.64	348.43	2.18		2	2	167 nM	13.984	117.88	718.66	4.23		3	7	167 nM	14.274	140.34	3108.42	3.01
1	26	125 nM	18	140.47	316.16	2.58		2	2	167 nM	17.98	126.43	718.68	4.17		3	7	167 nM	18.272	167.79	3057.8	2.6
1	26	125 nM	22	159.74	385.75	2.43		2	2	167 nM	21.984	138.12	722.29	4.53		3	7	167 nM	22.274	187.06	3062.69	2.83
1	26	125 nM	26	166.71	362.26	2.28		2	2	167 nM	25.983	145.52	722.41	4.46		3	7	167 nM	26.275	191.97	3040.65	2.65
1	26	125 nM	30	173.66	395.83	2.05		2	2	167 nM	29.984	155.73	716.44	4.76		3	7	167 nM	30.274	203.17	3054.41	2.7
1	26	125 nM	34	181.57	384.67	2.42		2	2	167 nM	33.985	160.54	725.15	4.35		3	7	167 nM	34.273	207.85	3044.12	2.38
1	26	125 nM	38	178.92	375.84	2.02		2	2	167 nM	37.98	167.95	729.21	4.31		3	7	167 nM	38.274	213.97	3024.98	2.76
1	26	125 nM	42	183.32	410.4	2.4		2	2	167 nM	41.984	175.34	729.26	5.08		3	7	167 nM	42.273	220.79	3056.63	2.19
1	26	125 nM	46	182.79	420.14	2.14		2	2	167 nM	45.984	174.64	720.8	4.63		3	7	167 nM	46.269	225.79	3057.41	2.22
1	26	125 nM	50	183.41	425.48	2.3		2	2	167 nM	49.984	180.78	720.83	5.05		3	7	167 nM	50.272	227.76	3065.38	2.7
1	26	125 nM	54	183.52	418.9	2.37		2	2	167 nM	53.984	187.99	691.47	5.58		3	7	167 nM	54.275	221.53	3013.93	2.66
1	26	125 nM	58	188.78	433.33	2.77		2	2	167 nM	57.984	191.37	683.8	5.5		3	7	167 nM	58.274	220.08	3002.76	2.28
1	26	125 nM	62	189.16	424.56	2.45		2	2	167 nM	61.984	190.25	647.32	5.5		3	7	167 nM	62.269	224.31	3026.04	2.61
1	26	125 nM	66	184.99	423.04	2.42		2	2	167 nM	65.98	190.72	623.04	6.24		3	7	167 nM	66.274	222.99	3036.96	2.74
1	26	125 nM	70	183.95	435.56	2.35		2	2	167 nM	69.984	187.29	648.31	5.11		3	7	167 nM	70.273	227.49	3042.71	2.09
1	26	125 nM	74	186.64	455.45	2.51		2	2	167 nM	73.983	185.5	631.96	6.53		3	7	167 nM	74.272	224.03	2996.29	2.22
1	26	125 nM	78	183.73	437.85	2.09		2	2	167 nM	77.983	188.46	678.25	5.76		3	7	167 nM	78.272	225.88	3001.67	2.62
1	26	125 nM	82	183.84	444.27	2.5		2	2	167 nM	81.984	188.18	642.53	6.04		3	7	167 nM	82.275	221.33	2955.71	2.49
1	26	125 nM	86	182.75	432.08	2.19		2	2	167 nM	85.984	190.5	620.22	6.26		3	7	167 nM	86.273	231.46	3009.76	2.81
1	26	125 nM	90	182.69	445.57	2.48		2	2	167 nM	89.982	186.39	611.59	6.09		3	7	167 nM	90.267	226.88	2964.67	2.45
1	26	125 nM	94	177.95	455.28	2.09		2	2	167 nM	93.982	186.89	625.15	5.58		3	7	167 nM	94.275	226.53	2954.69	2.39
1	26	125 nM	98	180.62	447.51	2.68		2	2	167 nM	97.984	183.81	599.89	5.32		3	7	167 nM	98.274	227	2948.06	2.63
1	27	125 nM	0	1217.64	830.72	3.25		2	3	167 nM	0.08	99.49	88.32	2.78		3	8	167 nM	0	1106.07	1534.52	2.54
1	27	125 nM	4	1187.48	838.33	3.16		2	3	167 nM	4.082	98.2	93.07	2.36		3	8	167 nM	3.997	1159.06	1540.23	2.47
1	27	125 nM	8	1144.41	817.96	2.95		2	3	167 nM	8.082	96.67	94.92	2.29		3	8	167 nM	8.004	1115.86	1532.11	2.23
1	27	125 nM	10	58.52	803.2	2.96		2	3	167 nM	10.043	16.4	82.01	2.47		3	8	167 nM	10.331	165.05	1505.06	2.41
1	27	125 nM	14	162.18	832.48	3.12		2	3	167 nM	13.985	37.5	81.85	2.17		3	8	167 nM	14.274	291.93	1479.25	2.31
1	27	125 nM	18	189.72	827.89	2.7		2	3	167 nM	17.985	46.36	77.3	2.23		3	8	167 nM	18.275	333.07	1499.12	2.55
1	27	125 nM	22	220.37	846.07	3.19		2	3	167 nM	21.985	42.53	66.44	2.56		3	8	167 nM	22.275	358.3	1511.73	2.37
1	27	125 nM	26	232.91	851.48	2.67		2	3	167 nM	25.983	43.69	72.55	2.32		3	8	167 nM	26.276	383.25	1487.14	2.1
1	27	125 nM	30	248.21	840.73	2.91		2	3	167 nM	29.985	45.32	69.01	2.22		3	8	167 nM	30.274	379.02	1462.75	2.77
1	27	125 nM	34	245.19	841.33	2.87		2	3	167 nM	33.981	41.12	66.71	2.43		3	8	167 nM	34.275	393.37	1431.19	2.51
1	27	125 nM	38	264.22	843.8	2.97		2	3	167 nM	37.981	38.76	59.1	2.21		3	8	167 nM	38.276	388.07	1480.05	2.22
1	27	125 nM	42	250.98	829.1	2.86		2	3	167 nM	41.985	38.99	72.3	2.15		3	8	167 nM	42.275	399.22	1420.59	2.38
1	27	125 nM	46	249.4	810.21	3.41		2	3	167 nM	45.985	44.6	78.79	2.43		3	8	167 nM	46.274	393.51	1398.2	2.15
1	27	125 nM	50	231.39	805.21	3.12		2	3	167 nM	49.985	49.85	85.4	2.47		3	8	167 nM	50.275	373.23	1426.3	2.34
1	27	125 nM	54	239.35	827.1	3.27		2	3	167 nM	53.983	49.14	82.68	2.43		3	8	167 nM	54.274	385.76	1443.95	2.74
1	27	125 nM	58	248.67	820.66	3.58		2	3	167 nM	57.985	44.64	86.63	2.25		3	8	167 nM	58.275	380.61	1391.44	2.23
1	27	125 nM	62	238.53	805.78	3.43		2	3	167 nM	61.986	40.79	81.88	1.75		3	8	167 nM	62.274	387.48	1453.28	2.6
1	27	125 nM	66	234.62	804.76	3.49		2	3	167 nM	65.984	39.95	92.58	2.11		3	8	167 nM	66.275	384.06	1460.88	2.62
1	27	125 nM	70	235.94	803.67	2.85		2	3	167 nM	69.985	50.1	121.08	2.46		3	8	167 nM	70.27	385.9	1443.99	2.26
1	27	125 nM	74	249.34	813.58	2.61		2	3	167 nM	73.985	53.15	121.29	2.25		3	8	167 nM	74.271	375.5	1340.26	2.51
1	27	125 nM	78	261.99	804.87	3.02		2	3	167 nM	77.984	51.46	121.42	2.35		3	8	167 nM	78.272	375.44	1321.83	2.62
1	27	125 nM	82	256.61	790.24	2.86		2	3	167 nM	81.983	52.22	123.32	2.51		3	8	167 nM	82.275	381.4	1436.25	2.6
1	27	125 nM	86	258.09	785.22	3.28		2	3	167 nM	85.981	50.65	113.46	1.98		3	8	167 nM	86.276	370.49	1473.74	2.51
1	27	125 nM	90	259.27	780.06	2.7		2	3	167 nM	89.986	47.78	106.57	2.08		3	8	167 nM	90.274	352.72	1367.72	2.2
1	27	125 nM	94	243.42	786.98	2.73		2	3	167 nM	93.985	55.72	127.33	2.26		3	8	167 nM	94.276	374.67	1366.1	2.63
1	27	125 nM	98	228.07	774.37	2.88		2	3	167 nM	97.985	50.56	122.81	2.34		3	8	167 nM	98.27	366.89	1389.98	2.31
1	28	125 nM	0	1350.55	120.56	2.34		2	4	167 nM	0.078	911.76	382.04	8.74		3	9	167 nM	0	1743.41	1152.41	2.25
1	28	125 nM	4	1373.4	118.39	2.31		2	4	167 nM	4.077	798.56	307.7	8.13		3	9	167 nM	4.003	1771.24	1214.89	2.47
1	28	125 nM	8	1394.23	120.24	2.46		2	4	167 nM	8.076	816.38	321.33	8.15		3	9	167 nM	7.998	1691.06	1157.17	2.34
1	28	125 nM	10	53.92	115.75	2.35		2	4	167 nM	10.05	35.95	277.76	6.49		3	9	167 nM	10.323	128.8	1106.88	2.21
1	28	125 nM	14	181.19	115.13	2.38		2	4	167 nM	13.989	112.06	231.18	6.14		3	9	167 nM	14.262	307.94	1106.69	2.19
1	28	125 nM	18	238.32	121.14	2.29		2	4	167 nM	17.989	145.23	233.69	6.13		3	9	167 nM	18.263	363.17	1123.35	2.52
1	28	125 nM	22	264.4	115.4	2.05		2	4	167 nM	21.99	156.91	202.35	5.33		3	9	167 nM	22.267	373.34	1158.48	2.54
1	28	125 nM	26	288.61	115.9	2.69		2	4	167 nM	25.986	162.84	193.41	5.23		3	9	167 nM	26.268	406.09	1179.87	2.1
1	28	125 nM	30	295.86	116.1	2.68		2	4	167 nM	29.99	160.87	172.53	4.99		3	9	167 nM	30.263	404.34	1167.52	2.34
1	28	125 nM	34	311.13	119.31	2.83		2	4	167 nM	33.99	155.01	155.83	4.93		3	9	167 nM	34.268	431.06	1162.97	1.95
1	28	125 nM	38	309.82	116.87	2.54		2	4	167 nM	37.99	153.8	160.25	4.85		3	9	167 nM	38.263	428.99	1137.47	1.96
1	28	125 nM	42	324.13	116.83	2.34		2	4	167 nM	41.99	160.74	160.13	4.84		3	9	167 nM	42.268	457.31	1178.45	2.44
1	28	125 nM	46	318.11	118.05	2.3		2	4	167 nM	45.99	166.78	156.82	4.79		3	9	167 nM	46.261	460.52	1170.51	2.54
1	28	125 nM	50	304.94	119.31	2.67		2	4	167 nM	49.99	163.6	167.47	4.37		3	9	167 nM	50.264	462.82	1157.81	2.22
1	28	125 nM	54	303.4	120.62	2.19		2	4	167 nM	53.99	164.34	170.99	4.95		3	9	167 nM	54.267	473.15	1161.06	2.36
1	28	125 nM	58	305.17	116.59	2.24		2	4	167 nM	57.99	135.93	125.82	4.31		3	9	167 nM	58.265	473.85	1147.34	2.47
1	28	125 nM	62	311.64	119.4	2.74		2	4	167 nM	61.991	137.36	141.3	4.71		3	9	167 nM	62.268	472.45	1137.31	2.08
1	28	125 nM	66	307.54	119.14	2.46		2	4	167 nM	65.99	136.92	139.3	4.11		3	9	167 nM	66.264	496.68	1135.37	2.27
1	28	125 nM	70	308.19	120.2	2.5		2	4	167 nM	69.99	158.61	158.02	4.27		3	9	167 nM	70.269	514.27	1120.7	2.53
1	28	125 nM	74	302.91	119.96	2.11		2	4	167 nM	73.99	168.96	168.29	4.35		3	9	167 nM	74.263	500.65	1075.48	2.51
1	28	125 nM	78	305.67	118.97	2.25		2	4	167 nM	77.99	185.82	167.72	4.33		3	9	167 nM	78.276	525.02	1071.84	2.21
1	28	125 nM	82	306.93	118	2.35		2	4	167 nM	81.99	196.36	165.69	4.43		3	9	167 nM	82.269	538.41	1095.45	2.49
1	28	125 nM	86	318.61	117.48	2.49		2	4	167 nM	85.991	195	165.2	4.15		3	9	167 nM	86.262	491.32	1088.15	2.16
1	28	125 nM	90	317.6	118.02	2.19		2	4	167 nM	89.99	188.47	152.12	4.53		3	9	167 nM	90.267	483.22	1031.78	2.44
1	28	125 nM	94	315.88	116.08	2.72		2	4	167 nM	93.99	183.94	139.89	4.01		3	9	167 nM	94.267	498.7	1067.92	2.46
1	28	125 nM	98	313.74	119.54	2.59		2	4	167 nM	97.99	146.64	114	4.03		3	9	167 nM	98.267	486.33	1003.4	2.29
1	1	150 nM	0	258.78	370.62	6.3		2	5	167 nM	0.078	647.18	125.16	2.43		3	10	167 nM	0	219.15	94.26	2.42
1	1	150 nM	4	259.65	366.96	6.22		2	5	167 nM	4.076	594.2	127.26	2.25		3	10	167 nM	3.999	220.41	93.05	2.34
1	1	150 nM	8	257.91	356.74	5.74		2	5	167 nM	8.077	729.97	121.88	2.28		3	10	167 nM	8	226.78	89.21	2.3
1	1	150 nM	10	31.11	373.2	5.92		2	5	167 nM	10.044	47.63	117.86	2.57		3	10	167 nM	10.326	64.98	85.81	2.28
1	1	150 nM	14	71.8	373.28	5.77		2	5	167 nM	13.985	136.97	116.99	2.39		3	10	167 nM	14.27	107.55	87.28	2.05
1	1	150 nM	18	79.61	374.6	5.63		2	5	167 nM	17.985	158.01	117.9	2.91		3	10	167 nM	18.269	115.83	81.68	2.26
1	1	150 nM	22	80.95	366.65	5.53		2	5	167 nM	21.982	189.24	116.54	2.12		3	10	167 nM	22.271	121.1	85.15	2.52
1	1	150 nM	26	83.34	367.22	5.73		2	5	167 nM	25.986	181.83	114.67	2.12		3	10	167 nM	26.266	124.23	94.38	2.16
1	1	150 nM	30	86.13	358.64	5.82		2	5	167 nM	29.986	185.95	118.16	2.49		3	10	167 nM	30.271	123.98	83.73	2.6
1	1	150 nM	34	85.34	366.04	4.99		2	5	167 nM	33.986	151.57	112.14	2.03		3	10	167 nM	34.27	125.22	93.5	2.29
1	1	150 nM	38	85.63	377.37	5.58		2	5	167 nM	37.986	136.24	108.77	2.24		3	10	167 nM	38.269	125.6	97.09	2.58
1	1	150 nM	42	86.52	371.82	6.04		2	5	167 nM	41.986	135.72	106.99	2.4		3	10	167 nM	42.27	129.22	102.96	1.78
1	1	150 nM	46	86.55	364.03	5.26		2	5	167 nM	45.985	135.74	100.83	2.21		3	10	167 nM	46.271	125.77	94.86	2.22
1	1	150 nM	50	86.87	364.56	6.05		2	5	167 nM	49.984	140.59	108.25	2.31		3	10	167 nM	50.27	122.22	93.32	2.08
1	1	150 nM	54	87.9	350.5	6.08		2	5	167 nM	53.986	131.9	94.08	2.79		3	10	167 nM	54.269	129.04	87.81	2.13
1	1	150 nM	58	86.51	349.17	5.27		2	5	167 nM	57.985	121.62	99.53	2.06		3	10	167 nM	58.27	124.87	97.33	2.22
1	1	150 nM	62	86.24	363.27	5.47		2	5	167 nM	61.985	125.08	105.76	2.37		3	10	167 nM	62.272	126.04	109.25	2.41
1	1	150 nM	66	86.77	364.33	5.97		2	5	167 nM	65.984	104.88	100.15	2.13		3	10	167 nM	66.269	127.25	100.3	2.23
1	1	150 nM	70	88.79	341.22	5.76		2	5	167 nM	69.986	105.44	97.78	2.36		3	10	167 nM	70.27	128.75	98.68	1.95
1	1	150 nM	74	88.74	340.64	5.18		2	5	167 nM	73.985	96.45	96.36	2.37		3	10	167 nM	74.269	131.11	97.91	2.51
1	1	150 nM	78	88.92	345.01	5.62		2	5	167 nM	77.984	102.62	102.05	2.08		3	10	167 nM	78.27	133.07	99.4	2.36
1	1	150 nM	82	89.66	336.95	6.03		2	5	167 nM	81.986	97.59	92.49	2.26		3	10	167 nM	82.269	131.09	101.66	2.34
1	1	150 nM	86	88.89	338.32	5.81		2	5	167 nM	85.985	91.74	90.05	1.86		3	10	167 nM	86.27	133.14	104.47	2.52
1	1	150 nM	90	89.64	332.15	5.78		2	5	167 nM	89.984	83.26	84.5	2.78		3	10	167 nM	90.271	132.24	106.39	2.56
1	1	150 nM	94	90.46	323.17	5.51		2	5	167 nM	93.985	90.59	92.32	2.44		3	10	167 nM	94.271	132.02	101.97	2.26
1	1	150 nM	98	89.56	318.41	6.05		2	5	167 nM	97.981	104.48	100.12	2.34		3	10	167 nM	98.27	132.33	109.82	3.16
1	2	150 nM	0	633.31	1130.35	2.65		2	6	167 nM	0.076	1038.14	695.49	2.38		3	11	167 nM	0	1820.66	1484.42	2.46
1	2	150 nM	4	639.07	1071.49	2.54		2	6	167 nM	4.077	1059.86	709.38	2.9		3	11	167 nM	4	1837	1512.42	2.72
1	2	150 nM	8	640.3	1076.26	2.33		2	6	167 nM	8.078	1066.15	721.36	2.91		3	11	167 nM	7.999	1836.55	1511.33	2.66
1	2	150 nM	10	58.72	988.78	2.32		2	6	167 nM	10.047	45.62	714.32	2.67		3	11	167 nM	10.327	67.47	1508.61	2.38
1	2	150 nM	14	111.33	1021.08	2.09		2	6	167 nM	13.986	201.87	716.89	2.81		3	11	167 nM	14.269	247.92	1512.95	2.89
1	2	150 nM	18	133.17	971.3	2.24		2	6	167 nM	17.988	260.53	709.8	2.65		3	11	167 nM	18.268	333.11	1541.53	2.56
1	2	150 nM	22	140.59	964.07	2.33		2	6	167 nM	21.987	293.03	702.14	2.28		3	11	167 nM	22.27	381.35	1569.33	2.51
1	2	150 nM	26	142.6	983.47	2.78		2	6	167 nM	25.989	322.55	695.45	2.98		3	11	167 nM	26.271	411.32	1514.93	2.56
1	2	150 nM	30	143.8	1010.64	2.21		2	6	167 nM	29.989	329.27	687.51	2.99		3	11	167 nM	30.27	432.09	1487.13	2.88
1	2	150 nM	34	145.82	987.02	2.38		2	6	167 nM	33.988	336.27	671.49	2.73		3	11	167 nM	34.269	441.35	1441.71	2.29
1	2	150 nM	38	144.82	1031.07	2.35		2	6	167 nM	37.987	333.68	688.33	2.84		3	11	167 nM	38.271	443.87	1442.92	2.58
1	2	150 nM	42	144.85	1053.43	2.17		2	6	167 nM	41.989	336.03	685.29	2.75		3	11	167 nM	42.27	448.8	1494.19	2.61
1	2	150 nM	46	151.72	1018.7	2.15		2	6	167 nM	45.988	325.24	658.87	3.24		3	11	167 nM	46.265	458.19	1456.84	2.64
1	2	150 nM	50	148.45	1036.74	2.24		2	6	167 nM	49.988	336.97	695.59	3.41		3	11	167 nM	50.266	460.05	1491.82	2.74
1	2	150 nM	54	141.27	1045.69	2.17		2	6	167 nM	53.988	347.88	686.78	2.62		3	11	167 nM	54.271	459.58	1501.1	2.8
1	2	150 nM	58	138.12	1065.28	2.3		2	6	167 nM	57.989	344.66	678.92	2.83		3	11	167 nM	58.271	457.79	1439.34	2.57
1	2	150 nM	62	138.97	1017.95	2.17		2	6	167 nM	61.988	338.99	719	3.35		3	11	167 nM	62.266	454.58	1469.89	2.61
1	2	150 nM	66	139.26	993.61	2.45		2	6	167 nM	65.989	325.59	709.22	3.25		3	11	167 nM	66.27	456.34	1486.42	2.2
1	2	150 nM	70	135.06	991.09	2.42		2	6	167 nM	69.989	325.96	695.6	2.82		3	11	167 nM	70.27	457.67	1476.37	2.61
1	2	150 nM	74	127.42	1037.43	2.66		2	6	167 nM	73.988	335.99	683.31	3.14		3	11	167 nM	74.271	461.5	1445	2.69
1	2	150 nM	78	123.13	1015.13	2.44		2	6	167 nM	77.988	333.92	632.89	3.23		3	11	167 nM	78.271	458.65	1442.26	2.48
1	2	150 nM	82	115.24	1021.48	2.07		2	6	167 nM	81.989	336.22	615.29	3.03		3	11	167 nM	82.27	460.23	1435.76	2.27
1	2	150 nM	86	103.46	987.92	2.29		2	6	167 nM	85.988	342.25	571.71	3.03		3	11	167 nM	86.269	446.55	1451.81	2.68
1	2	150 nM	90	99.49	960.77	2.26		2	6	167 nM	89.989	341.25	522.94	3.57		3	11	167 nM	90.27	447.39	1381.18	2.74
1	2	150 nM	94	94.34	984.87	2.45		2	6	167 nM	93.988	356.79	517.28	3.24		3	11	167 nM	94.27	444.33	1400.54	2.52
1	2	150 nM	98	91.64	961.62	2.42		2	6	167 nM	97.989	359.88	522	2.95		3	11	167 nM	98.271	441.27	1431.69	2.72
1	3	150 nM	0	128.75	155.81	2.19		2	7	167 nM	0.077	696.93	50.74	2.59		3	1	200 nM	0	1285.74	1053.1	2.52
1	3	150 nM	4	145.18	140.41	2.13		2	7	167 nM	4.078	716.12	52.43	2.58		3	1	200 nM	3.999	1261.33	1082.34	2.57
1	3	150 nM	8	131.31	131.5	2.38		2	7	167 nM	8.078	736.69	51.26	2.21		3	1	200 nM	8	1313.96	1097.47	2.73
1	3	150 nM	10	26.6	136.59	2.07		2	7	167 nM	10.081	68.01	45.09	2.39		3	1	200 nM	10.323	82.06	1039.78	2.53
1	3	150 nM	14	59.28	147.05	2.13		2	7	167 nM	14.022	131.02	45.64	2.47		3	1	200 nM	14.263	239.21	1011.68	2.12
1	3	150 nM	18	65.7	126.49	2.28		2	7	167 nM	18.022	152.85	46.76	2.51		3	1	200 nM	18.266	279.39	1024.15	2.55
1	3	150 nM	22	71.98	150.32	2.34		2	7	167 nM	22.021	169.8	47.62	2.31		3	1	200 nM	22.264	296.16	1035.05	2.29
1	3	150 nM	26	75.82	130.73	2.27		2	7	167 nM	26.021	180.33	48.67	2.56		3	1	200 nM	26.262	301.75	1062.59	2.68
1	3	150 nM	30	67.92	125.15	2.86		2	7	167 nM	30.022	185.73	49.35	2.23		3	1	200 nM	30.266	328.93	1007.41	2.56
1	3	150 nM	34	74.54	131.17	2.35		2	7	167 nM	34.018	187.51	49.47	2.29		3	1	200 nM	34.261	336.68	1030.67	2.26
1	3	150 nM	38	69.87	137.73	2.24		2	7	167 nM	38.018	189.68	53.49	2.38		3	1	200 nM	38.266	342.8	1018.62	1.92
1	3	150 nM	42	69.38	135.08	2.59		2	7	167 nM	42.018	190.5	51.62	2.09		3	1	200 nM	42.265	344.68	1038.52	2.66
1	3	150 nM	46	69.49	130.88	2.79		2	7	167 nM	46.018	185.28	53.26	2.46		3	1	200 nM	46.266	352.51	1016.52	2
1	3	150 nM	50	71.77	138.25	2.6		2	7	167 nM	50.021	184.16	49.73	2.65		3	1	200 nM	50.261	359.19	994.31	2.45
1	3	150 nM	54	77.33	149.66	2.21		2	7	167 nM	54.021	179.15	47.59	2.3		3	1	200 nM	54.262	360.25	1003.3	2.52
1	3	150 nM	58	77.47	135.46	2.36		2	7	167 nM	58.02	179.1	47.32	2.26		3	1	200 nM	58.266	362.42	1009.66	2.35
1	3	150 nM	62	71.16	138.98	2.73		2	7	167 nM	62.021	166.05	48.35	2.41		3	1	200 nM	62.263	361.72	1026.84	2.34
1	3	150 nM	66	72.66	138.59	2.66		2	7	167 nM	66.02	160.71	47.09	2.43		3	1	200 nM	66.262	363	1011.03	2.17
1	3	150 nM	70	66.83	132.18	2.62		2	7	167 nM	70.02	152.71	48.18	2.55		3	1	200 nM	70.263	369.74	1010.37	2.56
1	3	150 nM	74	73.65	145.03	2.24		2	7	167 nM	74.021	151.39	47.38	2.76		3	1	200 nM	74.262	371.23	1025.12	2.34
1	3	150 nM	78	73.09	155.13	2.22		2	7	167 nM	78.021	142.85	47.32	1.93		3	1	200 nM	78.263	373.83	1030.17	2.67
1	3	150 nM	82	70.15	143.66	2.22		2	7	167 nM	82.02	150.36	49.13	2.31		3	1	200 nM	82.262	370.32	1039	2.47
1	3	150 nM	86	79.78	148.35	2.4		2	7	167 nM	86.023	157.56	50.37	2.33		3	1	200 nM	86.265	371.67	1056.95	2.51
1	3	150 nM	90	83.99	160.12	2.43		2	7	167 nM	90.019	160.62	49.62	2.09		3	1	200 nM	90.26	370.48	1083.7	2.02
1	3	150 nM	94	74.16	151.96	2.13		2	7	167 nM	94.022	172.13	50.98	2.28		3	1	200 nM	94.262	375.48	1076.68	2.31
1	3	150 nM	98	86.37	161.77	2.37		2	7	167 nM	98.018	166.42	49.33	2.59		3	1	200 nM	98.263	375.35	1074.44	2.23
1	4	150 nM	0	257.44	293.77	2.56		2	8	167 nM	0.078	759.03	172.3	2.51		3	2	200 nM	0	1688.15	672.5	5.83
1	4	150 nM	4	258.15	308.16	2.6		2	8	167 nM	4.077	752.9	177.08	2.2		3	2	200 nM	4.001	1676.7	673.39	6.21
1	4	150 nM	8	275.98	312.69	2.38		2	8	167 nM	8.078	768.61	178.49	2.32		3	2	200 nM	8	1669.25	594.22	5.73
1	4	150 nM	10	56.31	297.99	2.71		2	8	167 nM	10.043	64.93	173.73	2.58		3	2	200 nM	10.329	73.78	656.55	6.06
1	4	150 nM	14	87.92	299.86	2.79		2	8	167 nM	13.984	131.84	176.1	2.33		3	2	200 nM	14.272	199.9	682.57	5.91
1	4	150 nM	18	92.02	302	2.22		2	8	167 nM	17.984	157.41	179.64	2.22		3	2	200 nM	18.271	239.86	757.03	5.31
1	4	150 nM	22	92.81	305.75	2.32		2	8	167 nM	21.982	163.28	170.42	2.5		3	2	200 nM	22.273	250.05	653.49	5.44
1	4	150 nM	26	95.6	297.11	2.2		2	8	167 nM	25.984	165.46	157.38	2.44		3	2	200 nM	26.272	263.43	686.53	5.77
1	4	150 nM	30	99.43	277.5	2.53		2	8	167 nM	29.984	158.83	136.49	2.5		3	2	200 nM	30.272	270.54	695.61	6.41
1	4	150 nM	34	97.78	285.55	2.29		2	8	167 nM	33.983	157.43	141.19	2.13		3	2	200 nM	34.271	274.84	758.15	6.14
1	4	150 nM	38	99.44	282.28	2.84		2	8	167 nM	37.984	135.12	153.18	2.51		3	2	200 nM	38.272	268.34	656.67	5.78
1	4	150 nM	42	99.19	290.92	2.33		2	8	167 nM	41.984	106.21	129.79	2.23		3	2	200 nM	42.271	272.58	662.25	5.8
1	4	150 nM	46	100.77	302.66	2.23		2	8	167 nM	45.983	128.85	133.73	2.77		3	2	200 nM	46.266	276.65	658.94	5.06
1	4	150 nM	50	98.81	301.73	2.52		2	8	167 nM	49.984	160.45	135.13	2.28		3	2	200 nM	50.269	270.77	592.4	4.62
1	4	150 nM	54	100.15	291.64	2.29		2	8	167 nM	53.982	125.66	126.4	2.45		3	2	200 nM	54.273	270.88	529.71	5.34
1	4	150 nM	58	99.46	296.62	2.37		2	8	167 nM	57.984	110.69	117.78	2.56		3	2	200 nM	58.266	283.48	531.61	5.57
1	4	150 nM	62	97.93	295.42	3.11		2	8	167 nM	61.984	101.99	93.65	2.67		3	2	200 nM	62.272	293.27	591.39	5.16
1	4	150 nM	66	100.54	299.05	2.22		2	8	167 nM	65.982	127.62	102.47	2.4		3	2	200 nM	66.268	286.97	603.33	5.63
1	4	150 nM	70	101.59	296.58	2.34		2	8	167 nM	69.984	122.36	91.9	2.03		3	2	200 nM	70.272	283.67	647.28	5.92
1	4	150 nM	74	99.29	296.18	2.26		2	8	167 nM	73.983	103.98	85.86	2.4		3	2	200 nM	74.272	280.72	652.17	5.89
1	4	150 nM	78	100.65	292.14	2.3		2	8	167 nM	77.984	119.1	83.15	2.81		3	2	200 nM	78.268	280.65	686.69	7
1	4	150 nM	82	100.09	294.6	2.65		2	8	167 nM	81.982	93.22	78.39	2.32		3	2	200 nM	82.273	285.83	661.95	6.93
1	4	150 nM	86	99.87	296.29	2.45		2	8	167 nM	85.984	83.35	72.86	1.97		3	2	200 nM	86.272	267.52	587.89	7.31
1	4	150 nM	90	100.02	285.08	2.55		2	8	167 nM	89.982	85.63	74.54	2.3		3	2	200 nM	90.273	284.71	631.87	7.12
1	4	150 nM	94	97.47	291.28	2.54		2	8	167 nM	93.984	93.28	63.11	2.1		3	2	200 nM	94.272	282.45	607.03	7.56
1	4	150 nM	98	95.17	295.6	2.85		2	8	167 nM	97.984	94.97	69.43	2.64		3	2	200 nM	98.273	279.77	647.62	6.97
1	5	150 nM	0	473.73	461.37	2.26		2	9	167 nM	0.078	292.33	1050.43	2.26		3	3	200 nM	0	2274.39	2521.52	2.55
1	5	150 nM	4	448.95	469.16	2.62		2	9	167 nM	4.077	321.47	1059.59	2.28		3	3	200 nM	4	2346.15	2506.18	2.45
1	5	150 nM	8	453.03	462.59	2.28		2	9	167 nM	8.077	314.56	1060.11	2.34		3	3	200 nM	8	2318.75	2593.35	2.56
1	5	150 nM	10	52.13	451.9	2.44		2	9	167 nM	10.042	17.73	1036.83	2.07		3	3	200 nM	10.33	71.34	2569.63	2.47
1	5	150 nM	14	105.98	452.06	2.37		2	9	167 nM	13.982	74.66	1051.12	2.28		3	3	200 nM	14.272	208.91	2563.89	2.51
1	5	150 nM	18	119.44	447.22	2.62		2	9	167 nM	17.979	98.51	1033.05	2.21		3	3	200 nM	18.273	261.46	2553.38	2.41
1	5	150 nM	22	122.71	449.46	2.45		2	9	167 nM	21.983	100.08	999.17	2.03		3	3	200 nM	22.272	288.54	2605.56	2.65
1	5	150 nM	26	127.36	462.4	2.33		2	9	167 nM	25.982	119.77	1035.04	2.44		3	3	200 nM	26.273	303.4	2570.89	2.64
1	5	150 nM	30	132.84	456.77	2.1		2	9	167 nM	29.982	125.99	1027.42	2.38		3	3	200 nM	30.268	311.21	2563.18	2.86
1	5	150 nM	34	137.25	462.81	2.28		2	9	167 nM	33.98	126.52	1019.43	2.34		3	3	200 nM	34.273	309.75	2651.43	2.52
1	5	150 nM	38	141.91	460.77	2.08		2	9	167 nM	37.984	135.85	1019.07	2.27		3	3	200 nM	38.273	323.28	2571.64	2.47
1	5	150 nM	42	131.23	459.11	2.09		2	9	167 nM	41.983	139.6	1012.11	2.32		3	3	200 nM	42.273	326.11	2583.33	2.34
1	5	150 nM	46	125.5	457.13	2.35		2	9	167 nM	45.983	143.95	1018.75	2.13		3	3	200 nM	46.273	323.21	2659.44	2.56
1	5	150 nM	50	132.62	465.59	2.41		2	9	167 nM	49.983	145.31	1006.74	2.17		3	3	200 nM	50.273	327.48	2647.35	2.58
1	5	150 nM	54	131.27	460.62	2.42		2	9	167 nM	53.981	146.79	1009.33	2.49		3	3	200 nM	54.274	324.05	2660.77	2.69
1	5	150 nM	58	129.77	451.94	2.31		2	9	167 nM	57.983	143.39	996.51	2.24		3	3	200 nM	58.273	331.71	2692.14	2.71
1	5	150 nM	62	126.48	453.32	2.09		2	9	167 nM	61.982	147.19	1010.11	2.44		3	3	200 nM	62.274	344.34	2603.32	2.57
1	5	150 nM	66	123.13	460.53	2.19		2	9	167 nM	65.982	137.49	985.84	2.3		3	3	200 nM	66.273	346.94	2605.43	2.53
1	5	150 nM	70	126.08	449.85	2.45		2	9	167 nM	69.981	146.78	965.61	2.01		3	3	200 nM	70.273	353.23	2624.45	2.51
1	5	150 nM	74	128.1	452.97	2.2		2	9	167 nM	73.984	141.59	930.28	2.21		3	3	200 nM	74.274	346.74	2641.39	2.89
1	5	150 nM	78	129.42	451.08	2.44		2	9	167 nM	77.983	147.53	894.24	2.08		3	3	200 nM	78.273	347.37	2646.49	2.77
1	5	150 nM	82	130.88	457.05	2.22		2	9	167 nM	81.983	148.95	871.81	2.62		3	3	200 nM	82.274	344.91	2671.91	2.68
1	5	150 nM	86	116.24	450.05	2.27		2	9	167 nM	85.983	146.81	892.31	2.51		3	3	200 nM	86.273	344.44	2699.02	2.51
1	5	150 nM	90	118.11	443.45	2.59		2	9	167 nM	89.983	151.24	934.8	2.39		3	3	200 nM	90.273	340.21	2725.63	3.21
1	5	150 nM	94	125.65	447.71	2.28		2	9	167 nM	93.982	162.51	943.6	2.49		3	3	200 nM	94.274	338.66	2700.96	2.35
1	5	150 nM	98	131.59	455.19	2.42		2	9	167 nM	97.977	145.76	933.26	1.99		3	3	200 nM	98.273	344.12	2644.22	2.97
1	6	150 nM	0	212.73	157.06	4.75		2	10	167 nM	0.079	544.76	786.6	2.28		3	4	200 nM	0	1831.91	1718.81	2.09
1	6	150 nM	4	213.36	158.49	4.74		2	10	167 nM	4.079	614.24	834.64	2.17		3	4	200 nM	3.999	1831.4	1671.75	2.32
1	6	150 nM	8	211.33	157.24	4.54		2	10	167 nM	8.077	589.44	821.53	2.29		3	4	200 nM	7.998	1807.32	1753.66	2.39
1	6	150 nM	10	35.7	151.05	4.61		2	10	167 nM	10.04	45.44	785.12	2.13		3	4	200 nM	10.37	81.94	1716.95	2.28
1	6	150 nM	14	64.25	159.74	3.79		2	10	167 nM	13.976	107.9	795.39	2.24		3	4	200 nM	14.313	258.72	1701.63	2.22
1	6	150 nM	18	70.17	162.96	4.57		2	10	167 nM	17.981	121.36	784.18	2.46		3	4	200 nM	18.313	331.65	1756.39	2.09
1	6	150 nM	22	74.54	163.17	4.76		2	10	167 nM	21.982	120.47	757.8	2.34		3	4	200 nM	22.315	370.06	1649.25	2.11
1	6	150 nM	26	73.45	161.71	4.27		2	10	167 nM	25.982	115.16	735.16	2.01		3	4	200 nM	26.314	391.29	1690.63	2.33
1	6	150 nM	30	75.87	165.37	4.58		2	10	167 nM	29.982	112.66	713.75	2.16		3	4	200 nM	30.314	409.27	1691.78	2.33
1	6	150 nM	34	75.89	159.88	5.08		2	10	167 nM	33.983	124.25	737.95	2.39		3	4	200 nM	34.313	422.5	1744.53	2.42
1	6	150 nM	38	74.3	156.85	4.62		2	10	167 nM	37.98	125.38	753.72	2.37		3	4	200 nM	38.312	428.64	1728.38	2.2
1	6	150 nM	42	74.07	157.11	4.53		2	10	167 nM	41.982	135.64	755.11	2.39		3	4	200 nM	42.309	439.16	1734.5	2.33
1	6	150 nM	46	74.97	150.8	4.44		2	10	167 nM	45.982	129.67	759.44	2.1		3	4	200 nM	46.312	447.21	1847.86	2.35
1	6	150 nM	50	76.09	155.3	4.35		2	10	167 nM	49.982	132.01	749.39	2.09		3	4	200 nM	50.314	449.51	1762.8	2.55
1	6	150 nM	54	74.89	154.3	4.25		2	10	167 nM	53.982	131.85	759.05	2.23		3	4	200 nM	54.314	455.65	1833.44	2.24
1	6	150 nM	58	75.16	155.7	4.15		2	10	167 nM	57.982	117.34	688.24	2.4		3	4	200 nM	58.313	458.11	1789.67	2.22
1	6	150 nM	62	77.51	157.55	4.56		2	10	167 nM	61.982	111.14	638.35	2.08		3	4	200 nM	62.314	459.96	1817.31	2.33
1	6	150 nM	66	78.83	162.08	4.52		2	10	167 nM	65.98	109.26	590.68	1.95		3	4	200 nM	66.313	464.51	1728.18	2.39
1	6	150 nM	70	77	158.48	4.82		2	10	167 nM	69.982	104.97	597.45	2.38		3	4	200 nM	70.312	467.46	1783.34	2.47
1	6	150 nM	74	79.64	166.08	4.14		2	10	167 nM	73.981	110.89	637.81	2.33		3	4	200 nM	74.309	476.74	1746.67	2.1
1	6	150 nM	78	82.56	170.22	4.84		2	10	167 nM	77.98	108.45	622.34	2.41		3	4	200 nM	78.314	482.27	1805.17	2.2
1	6	150 nM	82	82.54	168.29	4.08		2	10	167 nM	81.982	124.09	689.65	2.04		3	4	200 nM	82.313	489.46	1831.5	2.33
1	6	150 nM	86	81.24	164.56	4.41		2	10	167 nM	85.982	132	715.5	2.4		3	4	200 nM	86.312	492	1799.88	2.13
1	6	150 nM	90	81.56	163.08	4.39		2	10	167 nM	89.981	131.48	688.44	2.49		3	4	200 nM	90.313	495.12	1822.77	2.28
1	6	150 nM	94	79.96	154.38	4.18		2	10	167 nM	93.982	119.49	656.44	1.97		3	4	200 nM	94.315	489.05	1865.78	2.16
1	6	150 nM	98	78.18	147.62	4.36		2	10	167 nM	97.983	124.43	643.19	2.61		3	4	200 nM	98.314	493.08	1847.85	2.28
1	7	150 nM	0	903.34	1389.81	2.18		2	11	167 nM	0.078	367.55	212.88	4.25		3	5	200 nM	0	2778.08	2792.78	2.5
1	7	150 nM	4	937.17	1387.99	2.28		2	11	167 nM	4.077	329.21	209.81	4.21		3	5	200 nM	4.003	2820.37	2843.57	2.32
1	7	150 nM	8	997.59	1371.89	2.45		2	11	167 nM	8.077	378.09	206.89	4.91		3	5	200 nM	8.002	2803.25	2833.14	2.69
1	7	150 nM	10	85.35	1355.23	2.26		2	11	167 nM	10.042	34.85	198.94	4.7		3	5	200 nM	10.33	62.14	2838.87	1.92
1	7	150 nM	14	163.04	1364.25	2.5		2	11	167 nM	13.984	97.37	193.36	5.3		3	5	200 nM	14.273	185.65	2790.23	2.32
1	7	150 nM	18	185.98	1360.44	2.32		2	11	167 nM	17.985	112.7	194.75	4.64		3	5	200 nM	18.272	236.03	2706.87	2.7
1	7	150 nM	22	200.66	1374.04	2.06		2	11	167 nM	21.984	110.75	204.16	4.58		3	5	200 nM	22.276	267.52	2901.04	2.51
1	7	150 nM	26	229.09	1385.57	2.56		2	11	167 nM	25.98	103.18	207.22	4.19		3	5	200 nM	26.275	285.51	2855	2.28
1	7	150 nM	30	233.71	1397.89	2.47		2	11	167 nM	29.985	105.69	204.8	4.03		3	5	200 nM	30.274	299.18	2890.49	2.53
1	7	150 nM	34	262.56	1369.77	2.29		2	11	167 nM	33.985	110.97	200.79	4.4		3	5	200 nM	34.275	305.86	2889.5	2.32
1	7	150 nM	38	269.1	1366.05	2.29		2	11	167 nM	37.984	108.81	203.08	3.71		3	5	200 nM	38.276	314.05	2864.25	2.29
1	7	150 nM	42	277.27	1358.25	2.46		2	11	167 nM	41.984	116.51	199.91	4.26		3	5	200 nM	42.271	320.97	2896.51	2.26
1	7	150 nM	46	284.4	1359.38	2.14		2	11	167 nM	45.985	98.1	203.59	3.86		3	5	200 nM	46.274	325.59	2941.79	2.5
1	7	150 nM	50	279.66	1363.74	2.44		2	11	167 nM	49.984	86.65	203.85	3.83		3	5	200 nM	50.275	330.98	2945.35	2.11
1	7	150 nM	54	266.34	1366.19	2.32		2	11	167 nM	53.984	91.91	202.7	3.9		3	5	200 nM	54.274	332.5	2878.7	2.04
1	7	150 nM	58	266.55	1342.17	2.3		2	11	167 nM	57.985	86.46	205.95	4.11		3	5	200 nM	58.275	334.79	2807.4	2.33
1	7	150 nM	62	260.43	1353.15	2.42		2	11	167 nM	61.984	89.15	206.76	4.24		3	5	200 nM	62.273	336.43	2776.18	1.94
1	7	150 nM	66	256.08	1341.52	2.26		2	11	167 nM	65.984	82.99	204.45	3.81		3	5	200 nM	66.275	337.92	2810.76	2.06
1	7	150 nM	70	247.9	1354.28	2.18		2	11	167 nM	69.985	89.84	202.01	4.75		3	5	200 nM	70.274	341.15	2839.94	2.21
1	7	150 nM	74	238.46	1366.46	2.26		2	11	167 nM	73.985	98.06	197.51	4.4		3	5	200 nM	74.275	343.04	2855.34	2.33
1	7	150 nM	78	246.22	1358.24	2.25		2	11	167 nM	77.984	99.71	197.32	5.21		3	5	200 nM	78.274	341.89	2879.4	2.54
1	7	150 nM	82	250.02	1348.32	2.63		2	11	167 nM	81.984	116.32	189.37	4.68		3	5	200 nM	82.273	344.7	2864.29	2.59
1	7	150 nM	86	246.18	1356.14	2.23		2	11	167 nM	85.979	120.67	189.45	4.41		3	5	200 nM	86.274	347.7	2838.89	2.39
1	7	150 nM	90	245.93	1348.28	2.33		2	11	167 nM	89.98	118.95	195.02	4.99		3	5	200 nM	90.275	351.29	2885.88	2.56
1	7	150 nM	94	286.33	1338.31	2.25		2	11	167 nM	93.979	135.71	197.34	4.44		3	5	200 nM	94.275	350.64	2869.56	2.79
1	7	150 nM	98	271.94	1326.31	2.53		2	11	167 nM	97.982	124.31	199.22	4.44		3	5	200 nM	98.275	350.34	2829.92	2.42
1	8	150 nM	0	527.43	257.05	2.74		2	1	200 nM	0.083	785.45	127.77	2.09		3	6	200 nM	0	2308.45	927.19	2.18
1	8	150 nM	4	531.98	256.86	1.8		2	1	200 nM	4.082	792.89	134.89	2.73		3	6	200 nM	3.998	2394.27	923.83	2.51
1	8	150 nM	8	534.19	251.07	2.02		2	1	200 nM	8.08	785.65	129.55	1.95		3	6	200 nM	7.998	2325.02	991.86	2.31
1	8	150 nM	10	41.17	246.03	2.35		2	1	200 nM	10.047	58.38	127.72	1.94		3	6	200 nM	10.325	70.6	875.03	2.22
1	8	150 nM	14	102.69	252.11	2.53		2	1	200 nM	13.988	158.76	126.02	2.36		3	6	200 nM	14.269	197.74	971.81	2.43
1	8	150 nM	18	128.49	254.44	2.79		2	1	200 nM	17.985	189.88	118.28	2.15		3	6	200 nM	18.269	236.23	957.97	2.26
1	8	150 nM	22	145.35	251.39	2.57		2	1	200 nM	21.988	195.5	118.68	2.69		3	6	200 nM	22.268	259.86	964.76	2.6
1	8	150 nM	26	151.33	248.28	2.27		2	1	200 nM	25.986	207.56	122.62	2.34		3	6	200 nM	26.265	275.83	897.47	2.52
1	8	150 nM	30	160.47	255.92	2.2		2	1	200 nM	29.986	210	118.8	2.34		3	6	200 nM	30.266	279.59	888.61	2.46
1	8	150 nM	34	163.09	243.44	2.52		2	1	200 nM	33.986	214.21	122.04	1.95		3	6	200 nM	34.269	287.6	922.32	2.39
1	8	150 nM	38	160.01	228.72	2.42		2	1	200 nM	37.987	216.71	127.12	2.11		3	6	200 nM	38.269	291.91	909.43	2.25
1	8	150 nM	42	162.09	242.35	1.96		2	1	200 nM	41.988	218.49	117.81	2.7		3	6	200 nM	42.269	297.32	972.98	2.18
1	8	150 nM	46	165.14	240.58	2.19		2	1	200 nM	45.988	219.75	118.53	2.44		3	6	200 nM	46.269	298.32	996.71	2.05
1	8	150 nM	50	167.8	243.98	2.56		2	1	200 nM	49.988	222.38	123.73	2.15		3	6	200 nM	50.268	304.24	1013.93	2.42
1	8	150 nM	54	168.81	251.12	2.41		2	1	200 nM	53.988	224.86	125.96	2.58		3	6	200 nM	54.268	291.1	917.09	2.41
1	8	150 nM	58	167.61	242.26	2.21		2	1	200 nM	57.989	223.94	127.08	2.56		3	6	200 nM	58.269	296.5	928.09	2.51
1	8	150 nM	62	168.67	247.46	2.56		2	1	200 nM	61.988	224.58	129	2.7		3	6	200 nM	62.27	301.43	957.26	2.49
1	8	150 nM	66	169.38	251.5	2.05		2	1	200 nM	65.988	221.77	130.86	2.5		3	6	200 nM	66.269	302.6	937.45	2.38
1	8	150 nM	70	169.14	248.91	2.58		2	1	200 nM	69.988	227.88	127.81	2.3		3	6	200 nM	70.268	306.54	975.66	2.23
1	8	150 nM	74	169.42	243.99	2.6		2	1	200 nM	73.988	229.4	127.13	2.2		3	6	200 nM	74.269	315.54	1049.98	2.3
1	8	150 nM	78	169.01	243.71	2.39		2	1	200 nM	77.988	221.47	125.88	2.46		3	6	200 nM	78.268	309.48	971.95	2.84
1	8	150 nM	82	171.34	246.52	2.45		2	1	200 nM	81.988	229.9	121.85	2.63		3	6	200 nM	82.263	307.51	1002.88	2.5
1	8	150 nM	86	172.03	249.52	2.02		2	1	200 nM	85.989	223.35	124.88	2.04		3	6	200 nM	86.268	311.52	921.19	2.73
1	8	150 nM	90	167.83	244.93	1.87		2	1	200 nM	89.988	228.46	127.68	2.71		3	6	200 nM	90.269	317.08	934.07	2.15
1	8	150 nM	94	166.27	253.55	2.61		2	1	200 nM	93.988	225.56	128.51	2.52		3	6	200 nM	94.269	322.9	961.39	2.42
1	8	150 nM	98	166.55	245.1	2.51		2	1	200 nM	97.989	219.36	128.67	2.38		3	6	200 nM	98.268	326.2	967.25	2.61
1	9	150 nM	0	1016.03	315.82	1.92		2	2	200 nM	0.078	1808.1	1255.55	2.48		3	7	200 nM	0	3733.44	2420.73	2.11
1	9	150 nM	4	1020.32	312.15	2.35		2	2	200 nM	4.077	1788.78	1268.42	2.07		3	7	200 nM	3.999	3709.46	2330.26	2.27
1	9	150 nM	8	1013.99	315.45	2.29		2	2	200 nM	8.077	1779.04	1245.99	1.98		3	7	200 nM	7.999	3711.65	2429.78	2.67
1	9	150 nM	10	35	325.62	2.4		2	2	200 nM	10.06	43.04	1231.14	1.9		3	7	200 nM	10.325	53.03	2423.35	2.3
1	9	150 nM	14	156.66	320.99	2.2		2	2	200 nM	14.001	187.7	1234.05	2.51		3	7	200 nM	14.266	195.99	2336.19	2.6
1	9	150 nM	18	210.02	319.63	2.24		2	2	200 nM	17.999	240.95	1207.37	2.55		3	7	200 nM	18.268	281.15	2368.52	2.44
1	9	150 nM	22	241.37	326.1	2.38		2	2	200 nM	22	268.56	1160.8	2.25		3	7	200 nM	22.269	333.82	2428.99	2.49
1	9	150 nM	26	261.92	342.54	2.3		2	2	200 nM	26	281.66	1111.12	2.3		3	7	200 nM	26.268	369.05	2338.69	2.31
1	9	150 nM	30	277.53	320.1	2.36		2	2	200 nM	29.996	289.9	1134.03	2.59		3	7	200 nM	30.267	403.53	2485.77	2.34
1	9	150 nM	34	291.61	329.68	2.89		2	2	200 nM	34	298.41	1106.35	2.45		3	7	200 nM	34.268	419.62	2456.53	2.58
1	9	150 nM	38	296.77	321.36	2.27		2	2	200 nM	38.001	302.45	1114.65	2.46		3	7	200 nM	38.267	435.83	2423.98	2.77
1	9	150 nM	42	307.15	301.58	2.38		2	2	200 nM	41.997	304.35	1121.34	2.68		3	7	200 nM	42.268	443.18	2265.55	2.55
1	9	150 nM	46	305.45	318.45	2.41		2	2	200 nM	45.997	306.65	1145.34	2.6		3	7	200 nM	46.268	454.12	2323.71	2.39
1	9	150 nM	50	297.79	316.8	2.75		2	2	200 nM	49.996	306.7	1138.9	2.74		3	7	200 nM	50.266	460.49	2233.23	2.19
1	9	150 nM	54	296.11	323.62	2.65		2	2	200 nM	53.999	305.6	1134.82	2.2		3	7	200 nM	54.262	469.46	2380.43	2.59
1	9	150 nM	58	293.79	318.18	2.43		2	2	200 nM	58	305.33	1130.91	2.53		3	7	200 nM	58.267	472.37	2238.17	2.79
1	9	150 nM	62	286.84	319.49	2.49		2	2	200 nM	62	306.42	1129.73	2.15		3	7	200 nM	62.268	480.23	2237.66	2.08
1	9	150 nM	66	281.63	338.04	2.35		2	2	200 nM	66.001	305.19	1129.37	2.65		3	7	200 nM	66.269	486.18	2338.31	2.28
1	9	150 nM	70	291.49	311.05	2.09		2	2	200 nM	70.001	307.31	1118.47	2.24		3	7	200 nM	70.268	492.76	2346.18	2.68
1	9	150 nM	74	287.03	274.04	2.41		2	2	200 nM	74	300.82	1108.78	2.28		3	7	200 nM	74.267	491.48	2292.21	2.21
1	9	150 nM	78	278.96	306.02	2.55		2	2	200 nM	78.001	298.49	1127.61	2.19		3	7	200 nM	78.266	493.08	2296.64	2.04
1	9	150 nM	82	284.49	303.5	2.43		2	2	200 nM	81.999	300.25	1119.74	2.15		3	7	200 nM	82.267	497.34	2332.49	2.3
1	9	150 nM	86	281.91	308.37	2.57		2	2	200 nM	86	296.69	1124.24	2.76		3	7	200 nM	86.266	501.52	2372.8	2.65
1	9	150 nM	90	277.59	307.16	2.36		2	2	200 nM	89.999	295.1	1107.28	2.55		3	7	200 nM	90.267	500.98	2357.88	2.43
1	9	150 nM	94	275.78	311.95	2.36		2	2	200 nM	93.999	292.97	1129.06	2.75		3	7	200 nM	94.269	504.13	2304.97	2.09
1	9	150 nM	98	288.25	278.8	2.43		2	2	200 nM	98	298.97	1171.69	2.72		3	7	200 nM	98.268	504.65	2278.8	1.92
1	10	150 nM	0	874.71	874.42	7.89		2	3	200 nM	0.073	1873.23	1892.66	2.25		3	8	200 nM	0	1798.33	1873.21	2.66
1	10	150 nM	4	862.91	876.54	8.5		2	3	200 nM	4.076	1886.24	1872.91	2.23		3	8	200 nM	3.997	1721	1921.9	2.38
1	10	150 nM	8	862.88	878.27	8.19		2	3	200 nM	8.075	1891	1902.61	2.34		3	8	200 nM	7.998	1690.4	1952.87	2.52
1	10	150 nM	10	67.03	818.77	7.99		2	3	200 nM	10.058	63.17	1881.76	2.3		3	8	200 nM	10.323	66.32	1873.37	2.23
1	10	150 nM	14	177.1	845.98	8.18		2	3	200 nM	13.997	164.34	1884.94	2.15		3	8	200 nM	14.266	189.36	1850.04	2.19
1	10	150 nM	18	224.72	836.81	8.83		2	3	200 nM	17.998	209.36	1910.72	2.58		3	8	200 nM	18.267	224.84	1933.09	2.46
1	10	150 nM	22	244.96	828.59	8.47		2	3	200 nM	21.999	239.14	1897.91	2.26		3	8	200 nM	22.267	242.26	1921.71	2.12
1	10	150 nM	26	255.16	829.43	7.99		2	3	200 nM	25.998	253.09	1853.8	2.38		3	8	200 nM	26.262	252.27	1892.68	2.15
1	10	150 nM	30	262.97	841.04	9.16		2	3	200 nM	29.998	261.55	1826.71	2.39		3	8	200 nM	30.267	265.86	1859.01	2.66
1	10	150 nM	34	269.94	850.95	8.39		2	3	200 nM	33.999	271.06	1815.85	2.35		3	8	200 nM	34.266	263.44	1895.52	2.01
1	10	150 nM	38	261.33	847.72	8.18		2	3	200 nM	37.994	279.48	1801.99	2.64		3	8	200 nM	38.263	273.32	1876.33	1.93
1	10	150 nM	42	260.7	852.08	8.86		2	3	200 nM	41.998	286.42	1786.44	2.51		3	8	200 nM	42.266	275.64	1861.4	2.31
1	10	150 nM	46	262.92	855.21	8.34		2	3	200 nM	45.997	283.1	1746.07	2.56		3	8	200 nM	46.265	282.6	1807.77	2.25
1	10	150 nM	50	265.13	853.12	8.52		2	3	200 nM	49.999	290.57	1715.98	2.27		3	8	200 nM	50.264	283.72	1838.81	2.63
1	10	150 nM	54	262.56	864.62	8.59		2	3	200 nM	53.998	292.75	1691.57	2.67		3	8	200 nM	54.267	285.64	1852.99	2.69
1	10	150 nM	58	283.21	841.19	8.51		2	3	200 nM	57.997	289.1	1639.3	2.36		3	8	200 nM	58.269	283.85	1863.22	2.17
1	10	150 nM	62	270.15	855.32	8.84		2	3	200 nM	61.998	288.92	1615.74	2.34		3	8	200 nM	62.264	288.65	1894.86	2.32
1	10	150 nM	66	274.56	856.1	8.2		2	3	200 nM	65.994	290.66	1569.65	2.18		3	8	200 nM	66.267	283.25	1926.52	1.97
1	10	150 nM	70	279.55	855.5	8.89		2	3	200 nM	69.993	289.87	1563.69	2.25		3	8	200 nM	70.268	279.94	1920.38	2.29
1	10	150 nM	74	272.39	856.67	8.76		2	3	200 nM	73.998	290.26	1592.09	2.32		3	8	200 nM	74.267	280.27	1941.04	2.38
1	10	150 nM	78	264.02	854.68	9.16		2	3	200 nM	77.997	291.83	1623.78	2.03		3	8	200 nM	78.266	288.32	1870.41	2.22
1	10	150 nM	82	273.59	850.9	8.45		2	3	200 nM	81.998	301.13	1687.22	2.1		3	8	200 nM	82.267	287.46	1882.8	2.34
1	10	150 nM	86	268.64	848.02	8.85		2	3	200 nM	85.998	298.46	1711.08	2.35		3	8	200 nM	86.267	284.69	1929.81	2.54
1	10	150 nM	90	271.36	854.05	8.22		2	3	200 nM	89.999	303.36	1682.59	2.4		3	8	200 nM	90.268	276.89	1898.09	2.51
1	10	150 nM	94	275.45	853.89	8.35		2	3	200 nM	93.998	307.09	1709.07	2.27		3	8	200 nM	94.266	279	1947.32	2.25
1	10	150 nM	98	273.7	854.46	8.01		2	3	200 nM	97.998	305.4	1756.21	2.37		3	8	200 nM	98.262	288.28	1950.99	2.58
1	11	150 nM	0	215.03	111.22	2.44		2	4	200 nM	0.072	1241.55	936.14	10.36		3	9	200 nM	0	1050.54	80.23	2.32
1	11	150 nM	4	213.86	107.05	2.16		2	4	200 nM	4.075	1264.43	953.74	10.14		3	9	200 nM	4.005	1046.31	83.18	2.33
1	11	150 nM	8	212.98	106.26	2.29		2	4	200 nM	8.073	1255	961.2	10.06		3	9	200 nM	8.005	1138.29	73.44	2.12
1	11	150 nM	10	32.16	94.44	2.05		2	4	200 nM	10.039	73.43	945.13	10.62		3	9	200 nM	10.331	17.22	63.53	2.5
1	11	150 nM	14	80.93	103.62	2.09		2	4	200 nM	13.976	231.77	950.18	10.68		3	9	200 nM	14.276	24.89	74.89	2.05
1	11	150 nM	18	92.45	94.81	2.6		2	4	200 nM	17.978	292.99	950.72	9.17		3	9	200 nM	18.275	26.45	83.78	2.32
1	11	150 nM	22	97.42	100.61	2.6		2	4	200 nM	21.979	332.37	955.19	9.73		3	9	200 nM	22.277	26.49	82.43	2.25
1	11	150 nM	26	100.43	100.71	2.26		2	4	200 nM	25.979	358.96	969.51	9.19		3	9	200 nM	26.276	28.99	85.96	2.39
1	11	150 nM	30	101.73	91.56	2.18		2	4	200 nM	29.978	379.35	964.78	8.38		3	9	200 nM	30.275	28.48	91.37	2.71
1	11	150 nM	34	103.49	88.67	2.57		2	4	200 nM	33.979	380.34	948.81	9.17		3	9	200 nM	34.275	28.08	96.5	2.47
1	11	150 nM	38	106.35	104.77	2.26		2	4	200 nM	37.979	378.15	942.33	9.06		3	9	200 nM	38.275	26.98	95.6	1.89
1	11	150 nM	42	107.63	97.98	2.6		2	4	200 nM	41.979	390.26	965.71	9.85		3	9	200 nM	42.275	28.82	93.53	2.25
1	11	150 nM	46	107.21	112.11	2.39		2	4	200 nM	45.979	400.17	976.45	8.64		3	9	200 nM	46.274	26.97	97.95	2.16
1	11	150 nM	50	108.65	108.48	2.61		2	4	200 nM	49.979	408.82	965.41	7.42		3	9	200 nM	50.275	27.61	115.79	2.23
1	11	150 nM	54	106.56	107.46	2.49		2	4	200 nM	53.979	412.71	965.79	8.14		3	9	200 nM	54.274	28.62	111.26	2.56
1	11	150 nM	58	106.23	96.81	2.26		2	4	200 nM	57.98	410.77	976.46	8.51		3	9	200 nM	58.274	28.28	102.97	2.46
1	11	150 nM	62	107.58	96.26	2.53		2	4	200 nM	61.975	412.58	967.92	8.95		3	9	200 nM	62.277	27.81	93.59	2.26
1	11	150 nM	66	104.66	100.11	2.35		2	4	200 nM	65.979	413.91	938.66	8.95		3	9	200 nM	66.275	28.05	91.81	2.92
1	11	150 nM	70	106.05	97.77	2.46		2	4	200 nM	69.979	418.66	955.46	10.02		3	9	200 nM	70.275	27.21	90.33	2.57
1	11	150 nM	74	105.65	103.02	2.48		2	4	200 nM	73.979	421.86	958.72	9.01		3	9	200 nM	74.275	26.68	97.91	2.58
1	11	150 nM	78	103.67	108.5	2.48		2	4	200 nM	77.979	426.71	954.86	8.91		3	9	200 nM	78.274	26.7	103.48	2.45
1	11	150 nM	82	107.12	109.69	2.71		2	4	200 nM	81.979	424.31	939.05	8.84		3	9	200 nM	82.275	27.28	90.66	2.27
1	11	150 nM	86	108.28	96.93	2.39		2	4	200 nM	85.979	424.66	960.97	9.31		3	9	200 nM	86.274	27.54	86.36	2.38
1	11	150 nM	90	109.02	99.03	2.18		2	4	200 nM	89.979	431.04	974.1	8.42		3	9	200 nM	90.273	28.18	93.11	2.37
1	11	150 nM	94	108.31	102.45	2.42		2	4	200 nM	93.979	433.37	978.7	9.49		3	9	200 nM	94.277	27.67	84.99	2.26
1	11	150 nM	98	108.22	110.92	2.16		2	4	200 nM	97.979	437.68	984.78	8.59		3	9	200 nM	98.275	28.56	86.19	2.53
1	12	150 nM	0	590.69	547.64	6.43		2	5	200 nM	0.079	472.83	281.99	2.2		3	10	200 nM	0	3290.94	914.52	2.2
1	12	150 nM	4	605.4	536.26	6.3		2	5	200 nM	4.078	468.88	308.91	1.99		3	10	200 nM	3.999	3271.55	906.79	2.53
1	12	150 nM	8	596.21	553.02	6.79		2	5	200 nM	8.079	470.32	340.3	2.13		3	10	200 nM	8.001	3246.67	956.93	2.39
1	12	150 nM	10	22.76	529.45	6.81		2	5	200 nM	10.079	27.39	315.73	2.48		3	10	200 nM	10.335	72.27	978.61	2.28
1	12	150 nM	14	75.51	553.62	6.64		2	5	200 nM	14.011	64.84	326.37	2.2		3	10	200 nM	14.278	199.99	970.92	2.51
1	12	150 nM	18	96.99	549.78	7		2	5	200 nM	18.011	73.56	310.97	2.38		3	10	200 nM	18.279	253.15	933.2	2.65
1	12	150 nM	22	105.23	553.16	6.75		2	5	200 nM	22.011	76.41	308.94	2.36		3	10	200 nM	22.278	277.65	903.84	2.16
1	12	150 nM	26	113.06	550.65	6.77		2	5	200 nM	26.011	77.5	302.23	2.24		3	10	200 nM	26.277	301.66	872.76	2.37
1	12	150 nM	30	115.83	546.77	6.98		2	5	200 nM	30.012	76.41	295.4	2.24		3	10	200 nM	30.278	313.8	954.69	2.7
1	12	150 nM	34	119.38	555.68	6.62		2	5	200 nM	34.011	76.7	319.03	2.33		3	10	200 nM	34.277	319.13	927.64	2.19
1	12	150 nM	38	124.14	571.54	6.54		2	5	200 nM	38.011	78.21	348.21	2.38		3	10	200 nM	38.276	323.08	937.92	1.92
1	12	150 nM	42	125	557.79	6.36		2	5	200 nM	42.012	77.67	340.48	2.6		3	10	200 nM	42.273	325.02	890.14	2
1	12	150 nM	46	125.44	559.95	7.24		2	5	200 nM	46.009	77.69	319.85	2.5		3	10	200 nM	46.277	331.95	938.84	2.36
1	12	150 nM	50	124.54	542.06	7.09		2	5	200 nM	50.011	78.45	328.92	2.39		3	10	200 nM	50.278	338.32	922.47	1.96
1	12	150 nM	54	122.44	531.99	6.34		2	5	200 nM	54.009	79.45	350.97	2.76		3	10	200 nM	54.278	348.16	973.11	2.17
1	12	150 nM	58	127.19	545.35	7.11		2	5	200 nM	58.009	78.38	397.7	2.73		3	10	200 nM	58.277	351.22	1050.69	2.36
1	12	150 nM	62	125.13	543.19	6.36		2	5	200 nM	62.008	76.44	411.33	1.97		3	10	200 nM	62.278	358.95	1037.8	2.04
1	12	150 nM	66	123.26	547.13	6.48		2	5	200 nM	66.01	77.41	411	2.4		3	10	200 nM	66.277	365.26	1085.5	2.43
1	12	150 nM	70	122.65	534.46	6.39		2	5	200 nM	70.007	77.64	374.5	2.64		3	10	200 nM	70.278	369.02	1097.84	2.15
1	12	150 nM	74	127.12	533.57	6.36		2	5	200 nM	74.01	77.86	378.12	2.21		3	10	200 nM	74.279	365.52	955.84	2.42
1	12	150 nM	78	130.34	526.9	6.98		2	5	200 nM	78.01	77.94	342.17	2.84		3	10	200 nM	78.277	373.37	1014.63	2.07
1	12	150 nM	82	129.31	533.04	6.82		2	5	200 nM	82.011	78.16	359.89	2.78		3	10	200 nM	82.277	375.99	999.93	1.89
1	12	150 nM	86	126.14	521.53	6.37		2	5	200 nM	86.012	78.11	358.37	2.71		3	10	200 nM	86.278	383.92	1136.78	2.52
1	12	150 nM	90	126.05	503.89	6.75		2	5	200 nM	90.01	77.58	372.84	2.59		3	10	200 nM	90.276	378.66	1040.24	2.38
1	12	150 nM	94	128.32	498.84	6.85		2	5	200 nM	94.01	78.62	328.04	2.56		3	10	200 nM	94.279	378.66	1126.18	2.19
1	12	150 nM	98	120.78	491.42	5.64		2	5	200 nM	98.011	77.41	320.85	2.92		3	10	200 nM	98.278	382.46	1056.46	2.72
1	13	150 nM	0	800.28	1389.89	2.5		2	6	200 nM	0.08	1365.24	1233.75	2.22		3	11	200 nM	0	2024.79	2214.49	2.67
1	13	150 nM	4	798.98	1347.02	2.71		2	6	200 nM	4.079	1297.36	1237.31	2.39		3	11	200 nM	3.999	2042	2216.75	2.21
1	13	150 nM	8	815.89	1291.88	2.64		2	6	200 nM	8.079	1304.7	1215.67	2.53		3	11	200 nM	7.998	1985.11	2206.11	2.47
1	13	150 nM	10	34.14	1308.6	2.42		2	6	200 nM	10.046	71.31	1200.49	2.35		3	11	200 nM	10.34	28.91	2123.88	2.44
1	13	150 nM	14	99.79	1301.42	2.32		2	6	200 nM	13.987	177.12	1240.84	2.41		3	11	200 nM	14.283	71.23	2171.24	2.28
1	13	150 nM	18	127.72	1279.95	2.87		2	6	200 nM	17.983	230.79	1231.65	2.35		3	11	200 nM	18.283	92.19	2171.54	2.35
1	13	150 nM	22	138.66	1280.83	2.78		2	6	200 nM	21.983	255.45	1217.93	2.37		3	11	200 nM	22.284	103.01	2158.95	2.27
1	13	150 nM	26	146.21	1271.38	2.93		2	6	200 nM	25.987	255.33	1229.7	2.45		3	11	200 nM	26.283	112.47	2168.18	2.52
1	13	150 nM	30	150.25	1340.23	2.55		2	6	200 nM	29.986	274.13	1224.64	2.22		3	11	200 nM	30.284	119.04	2163.91	2.13
1	13	150 nM	34	151.8	1340.65	2.73		2	6	200 nM	33.987	289.49	1226.94	2.58		3	11	200 nM	34.283	125.66	2174.8	2.45
1	13	150 nM	38	157.03	1248.11	2.92		2	6	200 nM	37.988	302.57	1197.58	2.24		3	11	200 nM	38.278	128.98	2186.58	2.39
1	13	150 nM	42	156.53	1171.72	2.77		2	6	200 nM	41.987	311.19	1196.57	2.64		3	11	200 nM	42.283	130.52	2178.15	2.31
1	13	150 nM	46	156.19	1176.99	2.17		2	6	200 nM	45.987	314.89	1197.18	2.28		3	11	200 nM	46.284	133.34	2173.3	2.39
1	13	150 nM	50	152.93	1178.41	2.45		2	6	200 nM	49.987	320.7	1214.37	2.27		3	11	200 nM	50.283	132.57	2152.51	2.63
1	13	150 nM	54	151.42	1246.88	2.51		2	6	200 nM	53.987	321.56	1210.81	2.17		3	11	200 nM	54.284	135.07	2169.45	2.1
1	13	150 nM	58	150.85	1273.84	2.77		2	6	200 nM	57.987	324.56	1227.47	2.41		3	11	200 nM	58.283	136.93	2131.59	2.04
1	13	150 nM	62	152.57	1260.78	2.24		2	6	200 nM	61.987	318.68	1228.25	2.13		3	11	200 nM	62.283	138.54	2175.76	2.47
1	13	150 nM	66	155.48	1256.92	2.9		2	6	200 nM	65.987	314.08	1240.67	2.21		3	11	200 nM	66.278	135.72	2183.74	2.24
1	13	150 nM	70	154.14	1263.03	2.37		2	6	200 nM	69.986	314.25	1246.11	2.33		3	11	200 nM	70.281	140.65	2171.15	2.37
1	13	150 nM	74	152.42	1295.02	2.56		2	6	200 nM	73.987	315.09	1252.32	1.97		3	11	200 nM	74.284	140.43	2172.67	2.43
1	13	150 nM	78	150.19	1334.46	2.69		2	6	200 nM	77.988	315.63	1237.61	2.5		3	11	200 nM	78.283	138.4	2167.73	2.32
1	13	150 nM	82	156.53	1273.24	2.89		2	6	200 nM	81.987	313.6	1232.04	2.09		3	11	200 nM	82.282	138.02	2150.66	2.31
1	13	150 nM	86	157.69	1209.18	2.78		2	6	200 nM	85.987	309.8	1221.49	2.32		3	11	200 nM	86.284	134.63	2129.42	2.24
1	13	150 nM	90	158.54	1153.82	2.52		2	6	200 nM	89.987	307.42	1217.68	2.08		3	11	200 nM	90.283	136.65	2131.04	2.24
1	13	150 nM	94	162.36	1193	2.66		2	6	200 nM	93.984	307.64	1219.51	2.4		3	11	200 nM	94.283	139.48	2145.89	2.26
1	13	150 nM	98	165.53	1200.22	2.42		2	6	200 nM	97.987	309.19	1218.1	2.05		3	11	200 nM	98.284	141.36	2151.54	2.27
1	1	167 nM	0	1058.4	1169.32	2.13		2	7	200 nM	0.08	714.87	518.58	2.59		3	1	500 nM	0.077	1650.62	171.74	2.31
1	1	167 nM	4	1054.51	1170.46	2.38		2	7	200 nM	4.079	704.56	518.42	2.27		3	1	500 nM	4.075	1624.48	159.66	2.47
1	1	167 nM	8	1052.58	1182.09	2.04		2	7	200 nM	8.078	721.38	504.35	2.25		3	1	500 nM	8.077	1598.14	166.17	2.43
1	1	167 nM	10	66.55	1148.44	2.28		2	7	200 nM	10.047	48.91	465.62	2.16		3	1	500 nM	10.407	30.29	149.16	1.95
1	1	167 nM	14	121.36	1162.97	2.27		2	7	200 nM	13.987	129.94	481.8	2.28		3	1	500 nM	14.348	87.45	156.9	2.2
1	1	167 nM	18	138.65	1156.93	2.05		2	7	200 nM	17.988	150.06	469.17	2.29		3	1	500 nM	18.343	112.72	162.18	2.4
1	1	167 nM	22	153.22	1172.38	2.1		2	7	200 nM	21.989	151.14	472.39	2.39		3	1	500 nM	22.35	130.93	158.02	2.15
1	1	167 nM	26	165.42	1166.47	2.56		2	7	200 nM	25.988	151.04	483.27	2.5		3	1	500 nM	26.349	147.55	157.96	2.75
1	1	167 nM	30	172.04	1168.84	2.52		2	7	200 nM	29.988	151.99	492.27	2.3		3	1	500 nM	30.348	153.81	160.81	2.28
1	1	167 nM	34	175.34	1165.19	2.29		2	7	200 nM	33.988	158.18	476.91	1.99		3	1	500 nM	34.348	162.4	160.55	2.65
1	1	167 nM	38	174.05	1183.22	2.44		2	7	200 nM	37.983	159.31	485.34	2.39		3	1	500 nM	38.348	168.23	147.06	2.38
1	1	167 nM	42	175.3	1188.85	2.26		2	7	200 nM	41.988	163.44	492.35	2.76		3	1	500 nM	42.348	172.38	132.39	2.57
1	1	167 nM	46	171.54	1152.11	2.25		2	7	200 nM	45.988	165.43	444.96	2.4		3	1	500 nM	46.348	173.61	129.45	2.55
1	1	167 nM	50	176.32	1120.76	2.23		2	7	200 nM	49.987	171.96	448.58	2.52		3	1	500 nM	50.349	175.79	133.73	2.33
1	1	167 nM	54	178.64	1117.02	2.41		2	7	200 nM	53.988	166.28	435.06	2.32		3	1	500 nM	54.348	175.25	123.95	2.32
1	1	167 nM	58	185.04	1097.46	2.47		2	7	200 nM	57.988	169.51	414.81	2.49		3	1	500 nM	58.349	175.05	121.57	2.49
1	1	167 nM	62	191.06	1180.9	2.22		2	7	200 nM	61.988	168.43	442.84	2.25		3	1	500 nM	62.348	182.11	126.41	2.36
1	1	167 nM	66	192.05	1192.95	2.36		2	7	200 nM	65.988	171.95	435.16	2.36		3	1	500 nM	66.352	181.66	108.77	2.57
1	1	167 nM	70	189.68	1178.64	2.26		2	7	200 nM	69.983	172.03	427.71	2.13		3	1	500 nM	70.349	188.13	125.89	2.65
1	1	167 nM	74	195.21	1176.84	2.32		2	7	200 nM	73.988	180.93	417.02	2.73		3	1	500 nM	74.348	187.67	121.52	2.28
1	1	167 nM	78	196.17	1155.37	2.32		2	7	200 nM	77.987	180.29	421.36	2.14		3	1	500 nM	78.349	188.07	118.43	2.14
1	1	167 nM	82	192.95	1182.24	2.07		2	7	200 nM	81.988	176.25	445.01	2.51		3	1	500 nM	82.348	191.73	125.15	2.36
1	1	167 nM	86	183.43	1202.63	2.05		2	7	200 nM	85.988	176.84	451.66	2.89		3	1	500 nM	86.344	194.82	124.27	2.34
1	1	167 nM	90	189.7	1221.72	2.41		2	7	200 nM	89.987	176.8	433.87	2.51		3	1	500 nM	90.349	202.39	146.37	2.45
1	1	167 nM	94	197.32	1224.99	2.25		2	7	200 nM	93.988	183.47	391.15	2.29		3	1	500 nM	94.348	199.33	137.44	2.26
1	1	167 nM	98	201.65	1220.65	2.68		2	7	200 nM	97.986	179.51	426.81	2.43		3	1	500 nM	98.347	198.13	131.84	2.78
1	2	167 nM	0	709.47	338.25	3.16		2	8	200 nM	0.079	1631.46	1639.77	2.73		3	2	500 nM	0.075	1382.42	1323.52	2.23
1	2	167 nM	4	719.29	342.36	3.42		2	8	200 nM	4.078	1639.75	1652.83	2.83		3	2	500 nM	4.073	1376.08	1308.16	2.47
1	2	167 nM	8	713.23	345.49	2.69		2	8	200 nM	8.077	1634.46	1657.64	3.11		3	2	500 nM	8.072	1387	1298.32	2.27
1	2	167 nM	10	46.64	331.01	2.87		2	8	200 nM	10.064	56.41	1624	2.63		3	2	500 nM	10.404	20.66	1231.44	2.65
1	2	167 nM	14	112.99	331.9	2.86		2	8	200 nM	14.005	183.43	1633.14	2.53		3	2	500 nM	14.346	36.28	1228.14	2.68
1	2	167 nM	18	132.24	328.49	2.98		2	8	200 nM	18.004	227.91	1603.9	2.85		3	2	500 nM	18.346	40.73	1218.93	1.91
1	2	167 nM	22	142.83	334.32	2.8		2	8	200 nM	22.006	251.27	1631.78	3.08		3	2	500 nM	22.345	44.48	1210.33	2.32
1	2	167 nM	26	148.39	336.64	2.93		2	8	200 nM	26.005	261.84	1623.3	2.47		3	2	500 nM	26.344	45.96	1202.93	2.19
1	2	167 nM	30	150.79	336.98	2.6		2	8	200 nM	30.006	272.85	1607.08	2.72		3	2	500 nM	30.345	47.1	1213.38	2.09
1	2	167 nM	34	152.56	324.74	3.01		2	8	200 nM	34.002	277.41	1572.73	2.6		3	2	500 nM	34.344	49.27	1202.35	2.23
1	2	167 nM	38	153.46	331.89	2.9		2	8	200 nM	38.006	285.47	1585.2	2.73		3	2	500 nM	38.347	49.28	1081.12	2.09
1	2	167 nM	42	154.52	333.84	2.72		2	8	200 nM	42.005	289.19	1585.39	3.08		3	2	500 nM	42.345	51.44	1215.51	2.32
1	2	167 nM	46	155.01	334.79	3.01		2	8	200 nM	46.002	289.75	1575.26	2.79		3	2	500 nM	46.347	52.28	1196.01	2.78
1	2	167 nM	50	153.99	334.77	2.77		2	8	200 nM	50.005	295.39	1583.07	2.57		3	2	500 nM	50.345	52.16	1183.5	2.27
1	2	167 nM	54	157.63	334.47	2.76		2	8	200 nM	54.005	299.89	1588.22	2.58		3	2	500 nM	54.345	52.41	1171.78	2.41
1	2	167 nM	58	156.12	322.91	3.01		2	8	200 nM	58.006	304.95	1600.47	2.72		3	2	500 nM	58.341	52.59	1153.36	2.36
1	2	167 nM	62	155.88	324.82	2.89		2	8	200 nM	62.006	308.11	1597.75	2.5		3	2	500 nM	62.346	52.54	1073.15	2.17
1	2	167 nM	66	158.53	316.28	3.07		2	8	200 nM	66.005	313.39	1620.8	2.56		3	2	500 nM	66.347	52.41	1076.88	1.88
1	2	167 nM	70	158.93	322.24	2.77		2	8	200 nM	70.005	318.42	1601.17	2.62		3	2	500 nM	70.346	53.86	1148.5	2.14
1	2	167 nM	74	159.6	329.37	3.42		2	8	200 nM	74.006	320.11	1607.07	2.09		3	2	500 nM	74.342	54.16	1077.54	2.15
1	2	167 nM	78	157.67	332.25	2.67		2	8	200 nM	78.005	311.57	1537.46	3.02		3	2	500 nM	78.347	54.27	1153.04	2.36
1	2	167 nM	82	159.5	331.02	2.72		2	8	200 nM	82.005	318.7	1578.23	2.46		3	2	500 nM	82.346	55.16	1134.26	2.17
1	2	167 nM	86	158.35	323.17	3.13		2	8	200 nM	86.005	320.13	1560.65	2.66		3	2	500 nM	86.341	54.28	1147.65	2.13
1	2	167 nM	90	157.23	328.3	2.78		2	8	200 nM	90.006	320.49	1552.15	2.55		3	2	500 nM	90.346	56.34	1179.86	2.32
1	2	167 nM	94	157.41	329.03	3.08		2	8	200 nM	94.005	320.17	1468.9	2.4		3	2	500 nM	94.345	56.27	1140.53	2.22
1	2	167 nM	98	160.53	330.88	3.2		2	8	200 nM	98.005	314.74	1507.34	2.69		3	2	500 nM	98.346	56.06	1143.81	2.12
1	3	167 nM	0	477.91	495.83	14.52		2	9	200 nM	0.072	2014.77	878.63	2.43		3	3	500 nM	0.074	1397.29	982.84	2.37
1	3	167 nM	4	477.63	498.01	15.33		2	9	200 nM	4.076	1941.99	803.18	2.42		3	3	500 nM	4.075	1383.78	976.96	2.55
1	3	167 nM	8	494.99	478.83	13.81		2	9	200 nM	8.075	1957.55	914.73	2.27		3	3	500 nM	8.07	1400.18	992.47	2.39
1	3	167 nM	10	42.9	453.8	14.19		2	9	200 nM	10.04	60.14	831.35	2.53		3	3	500 nM	10.414	51.06	960.16	2.43
1	3	167 nM	14	93.52	462.15	13.79		2	9	200 nM	13.98	175.01	959.36	2.74		3	3	500 nM	14.355	153.58	966.74	2.6
1	3	167 nM	18	113.08	450.11	12.65		2	9	200 nM	17.98	232.39	926.44	2.16		3	3	500 nM	18.356	190.12	965.04	2.46
1	3	167 nM	22	110.48	453.36	13.38		2	9	200 nM	21.979	266.66	889.04	2.21		3	3	500 nM	22.356	209.1	958.89	2.09
1	3	167 nM	26	99.43	466.52	12.39		2	9	200 nM	25.98	281.95	932.77	2.49		3	3	500 nM	26.356	217.17	969.86	2.32
1	3	167 nM	30	108.03	452.05	12.12		2	9	200 nM	29.98	297.89	860.43	2.6		3	3	500 nM	30.356	225.97	965.8	2.48
1	3	167 nM	34	124.13	436.9	11.96		2	9	200 nM	33.98	305.92	881.89	2.03		3	3	500 nM	34.356	230.6	963.43	1.99
1	3	167 nM	38	121.78	426.14	12.73		2	9	200 nM	37.98	313.79	888.11	2.28		3	3	500 nM	38.351	234.83	964.11	2.42
1	3	167 nM	42	122.81	431.77	13.22		2	9	200 nM	41.98	328.24	871.14	2.59		3	3	500 nM	42.356	235.24	961.03	1.96
1	3	167 nM	46	117.4	441.9	12.9		2	9	200 nM	45.979	325.19	892.22	2.32		3	3	500 nM	46.357	236.54	950.15	2.26
1	3	167 nM	50	124.64	446.37	12.1		2	9	200 nM	49.979	338.16	906.33	2.54		3	3	500 nM	50.356	239.99	958.91	2.27
1	3	167 nM	54	137.39	448.35	12.1		2	9	200 nM	53.98	341.63	868.25	2.24		3	3	500 nM	54.356	239.79	952.09	2.74
1	3	167 nM	58	135.19	486.4	12.4		2	9	200 nM	57.979	346.66	835.38	2.21		3	3	500 nM	58.356	238.9	952.25	2.5
1	3	167 nM	62	131.27	497.27	12.54		2	9	200 nM	61.98	353.44	853.54	2.23		3	3	500 nM	62.355	240.75	943.55	2.46
1	3	167 nM	66	137.82	505.92	14.14		2	9	200 nM	65.98	354.47	875.41	2.31		3	3	500 nM	66.352	243.14	935.02	2.35
1	3	167 nM	70	139.91	475.54	14.42		2	9	200 nM	69.98	362.46	866.21	2.32		3	3	500 nM	70.358	245.48	932.92	2.56
1	3	167 nM	74	145.9	469.88	14.05		2	9	200 nM	73.98	363.94	859.8	2.66		3	3	500 nM	74.357	248.11	916.14	2.36
1	3	167 nM	78	150.36	434.68	13.41		2	9	200 nM	77.976	370.81	849.23	2.2		3	3	500 nM	78.356	248.55	932.82	2.22
1	3	167 nM	82	152.37	446.69	13.26		2	9	200 nM	81.98	376.56	821.23	2.32		3	3	500 nM	82.355	253.69	942.53	2.34
1	3	167 nM	86	149.5	451.56	14.34		2	9	200 nM	85.979	380.5	836.01	2.43		3	3	500 nM	86.356	250.22	930.17	2.13
1	3	167 nM	90	151.93	426.25	13.92		2	9	200 nM	89.978	392.44	849.44	2.63		3	3	500 nM	90.353	253.05	915.51	2.42
1	3	167 nM	94	150.64	439.22	12.78		2	9	200 nM	93.98	391.34	823.18	2.1		3	3	500 nM	94.356	250.61	913.53	2.37
1	3	167 nM	98	148.05	446.41	13.15		2	9	200 nM	97.98	416	835.79	2.45		3	3	500 nM	98.355	254.21	943.43	2.46
1	4	167 nM	0	1749.61	787.8	2.15		2	10	200 nM	0.072	769.27	390.95	13.96		3	4	500 nM	0.071	2441.86	2945.44	2.22
1	4	167 nM	4	1740.66	798.61	2.29		2	10	200 nM	4.071	766.3	387.17	14.11		3	4	500 nM	4.074	2431.57	2916.01	2.2
1	4	167 nM	8	1698.49	789.79	1.95		2	10	200 nM	8.075	744.09	396.31	13.66		3	4	500 nM	8.072	2374.92	2907.75	2.25
1	4	167 nM	10	46.55	760.75	2		2	10	200 nM	10.043	56.91	345.83	13.26		3	4	500 nM	10.411	50.47	2855.62	2.76
1	4	167 nM	14	166.89	769.41	2.21		2	10	200 nM	13.983	163.53	352.39	12.88		3	4	500 nM	14.354	161.98	2873.27	2.55
1	4	167 nM	18	233.01	765.5	2.39		2	10	200 nM	17.978	190.75	369.4	13.31		3	4	500 nM	18.353	211.46	2862.47	2.78
1	4	167 nM	22	270.1	760.29	2.38		2	10	200 nM	21.983	202.97	371.24	13.93		3	4	500 nM	22.355	238.02	2869.5	2.41
1	4	167 nM	26	291.33	764.76	1.9		2	10	200 nM	25.983	213.49	388.06	13.01		3	4	500 nM	26.354	252.02	2861.37	2.37
1	4	167 nM	30	311.54	760.47	2.31		2	10	200 nM	29.977	212.39	389.98	13.93		3	4	500 nM	30.349	261.96	2857.1	2.83
1	4	167 nM	34	323.12	751.9	2.13		2	10	200 nM	33.982	213.35	384.07	12.94		3	4	500 nM	34.355	270.67	2847.01	2.52
1	4	167 nM	38	333.35	756.17	2.33		2	10	200 nM	37.983	209.79	398.74	11.64		3	4	500 nM	38.355	275.35	2837.74	2.81
1	4	167 nM	42	341.55	761.99	2.65		2	10	200 nM	41.983	214.08	388.85	12.01		3	4	500 nM	42.355	275.01	2829.05	2.37
1	4	167 nM	46	340.45	753.79	2.34		2	10	200 nM	45.982	215.44	398.67	12.17		3	4	500 nM	46.354	275.88	2825.11	1.92
1	4	167 nM	50	344.17	746.57	2.17		2	10	200 nM	49.981	209.49	404.37	11.47		3	4	500 nM	50.353	279.73	2823.96	2.32
1	4	167 nM	54	343.87	761.84	2.22		2	10	200 nM	53.983	213.94	401.19	11.81		3	4	500 nM	54.355	281.87	2826.17	2.54
1	4	167 nM	58	348.02	759.04	2.04		2	10	200 nM	57.981	211.59	397.83	11.6		3	4	500 nM	58.354	284.31	2819.12	2.77
1	4	167 nM	62	351.99	764.8	2.35		2	10	200 nM	61.981	207.22	400.93	12.39		3	4	500 nM	62.356	284.22	2813.39	2.23
1	4	167 nM	66	358.03	754.5	2.04		2	10	200 nM	65.983	206.95	403.99	11.49		3	4	500 nM	66.358	287.37	2816.81	2.76
1	4	167 nM	70	362.15	766.95	2.06		2	10	200 nM	69.984	211.13	398.22	11.07		3	4	500 nM	70.354	286.28	2799.88	2.24
1	4	167 nM	74	357.21	751.39	2.31		2	10	200 nM	73.982	216.26	377.66	12.53		3	4	500 nM	74.356	285.9	2795.48	2.1
1	4	167 nM	78	356.5	757.23	2.07		2	10	200 nM	77.983	214.71	376.5	11.75		3	4	500 nM	78.355	287	2770.32	1.84
1	4	167 nM	82	361.46	758.78	2.22		2	10	200 nM	81.984	220.57	355.88	12.21		3	4	500 nM	82.353	287.56	2763.07	2.2
1	4	167 nM	86	357.82	761.42	2.13		2	10	200 nM	85.98	215.19	364.73	12.1		3	4	500 nM	86.354	285.22	2744.48	2.39
1	4	167 nM	90	361.33	763.04	1.98		2	10	200 nM	89.977	219.11	365.59	12.03		3	4	500 nM	90.353	286.77	2763.15	2.39
1	4	167 nM	94	366.21	759.89	2.15		2	10	200 nM	93.981	218.66	372.78	12.3		3	4	500 nM	94.355	288.85	2766.92	2.15
1	4	167 nM	98	369.65	773.91	2.29		2	10	200 nM	97.983	219.26	367.82	11.9		3	4	500 nM	98.354	288.77	2761.06	2.1
1	5	167 nM	0	1305.63	56.82	2.51		2	11	200 nM	0.078	1240.49	777.59	2.05		3	5	500 nM	0.076	824.98	420.43	2.26
1	5	167 nM	4	1337.6	56.98	2.29		2	11	200 nM	4.079	1248.33	759.73	2.33		3	5	500 nM	4.076	834.94	429.57	2.09
1	5	167 nM	8	1376	55.81	2.19		2	11	200 nM	8.08	1256.31	776.27	2.23		3	5	500 nM	8.075	821.58	411.24	2.35
1	5	167 nM	10	41.25	54.34	2.48		2	11	200 nM	10.051	45.97	761.2	2.21		3	5	500 nM	10.417	57.96	410.8	2.34
1	5	167 nM	14	121.25	55.03	2.93		2	11	200 nM	13.991	102.29	744.59	2.91		3	5	500 nM	14.36	156.26	383.54	2.36
1	5	167 nM	18	166.52	55.29	2.34		2	11	200 nM	17.991	118.27	755.69	1.93		3	5	500 nM	18.359	184.07	389.55	2.64
1	5	167 nM	22	223.99	55.93	2.24		2	11	200 nM	21.991	127.54	751.17	2.7		3	5	500 nM	22.36	203.45	388.05	2.37
1	5	167 nM	26	222.55	54.61	2.35		2	11	200 nM	25.992	131.93	747.06	2.25		3	5	500 nM	26.36	204.27	426.82	2.13
1	5	167 nM	30	223.04	54.29	2.62		2	11	200 nM	29.988	136.09	730.39	2.78		3	5	500 nM	30.361	205.59	436.7	2.42
1	5	167 nM	34	223.14	53.1	2.42		2	11	200 nM	33.991	139.7	752.31	2.35		3	5	500 nM	34.36	212.08	402.08	3
1	5	167 nM	38	221.67	53.77	2.52		2	11	200 nM	37.99	141.73	728.77	2.55		3	5	500 nM	38.359	215.61	413.47	2.23
1	5	167 nM	42	225.72	53.44	2.22		2	11	200 nM	41.991	138.23	722.16	2.63		3	5	500 nM	42.359	215.44	428.91	2.11
1	5	167 nM	46	226.67	53.27	2.1		2	11	200 nM	45.991	139.68	713.6	2.17		3	5	500 nM	46.361	211.64	425.34	2.17
1	5	167 nM	50	232.32	53.79	2.29		2	11	200 nM	49.992	139.07	725.74	2.62		3	5	500 nM	50.359	217.08	445.94	2.22
1	5	167 nM	54	231.09	52.54	2.11		2	11	200 nM	53.99	139.15	713.91	2.05		3	5	500 nM	54.36	211.7	436.61	2.32
1	5	167 nM	58	240.58	53.16	2.37		2	11	200 nM	57.992	141.63	745.88	2.02		3	5	500 nM	58.359	210.67	444.54	2.69
1	5	167 nM	62	240.39	53.81	2.26		2	11	200 nM	61.992	140.4	738.21	2.13		3	5	500 nM	62.355	211.68	416.71	2.68
1	5	167 nM	66	242.62	54.46	2.49		2	11	200 nM	65.992	142.06	711.43	2.64		3	5	500 nM	66.36	213.83	401.71	2.36
1	5	167 nM	70	252.48	56.15	2.23		2	11	200 nM	69.991	143.79	717.66	2.42		3	5	500 nM	70.359	210.12	387.99	2.69
1	5	167 nM	74	260.95	55.6	2.34		2	11	200 nM	73.991	143.65	732.35	2.41		3	5	500 nM	74.359	209.04	402.54	2.56
1	5	167 nM	78	268.38	55.86	2.44		2	11	200 nM	77.992	144.95	725.19	2.57		3	5	500 nM	78.355	214.91	417.32	2.28
1	5	167 nM	82	267.02	56	2.21		2	11	200 nM	81.991	144.1	731.66	2.34		3	5	500 nM	82.361	219.13	419.19	2.4
1	5	167 nM	86	271.49	54.71	2.75		2	11	200 nM	85.992	145.5	750.26	1.76		3	5	500 nM	86.36	208.34	387.11	2.66
1	5	167 nM	90	294.48	55.77	2.54		2	11	200 nM	89.992	147.09	747.85	2.54		3	5	500 nM	90.359	214.46	381.23	2.32
1	5	167 nM	94	288.57	56.66	2.83		2	11	200 nM	93.99	148.26	728.01	2.45		3	5	500 nM	94.358	208.98	377.75	2.63
1	5	167 nM	98	295.79	56.21	2.29		2	11	200 nM	97.988	148.66	735.17	2.34		3	5	500 nM	98.36	213.01	377.59	2.28
1	6	167 nM	0	1303.3	1009.13	2.48		2	12	200 nM	0.073	1398.72	1932.19	2.16		3	6	500 nM	0.072	1642.94	3183.74	2.41
1	6	167 nM	4	1282.2	1037.73	2.58		2	12	200 nM	4.075	1390.65	1917.57	2.28		3	6	500 nM	4.071	1612.48	3209.21	2.14
1	6	167 nM	8	1307.72	994.54	2.46		2	12	200 nM	8.072	1430.3	1933.43	2.67		3	6	500 nM	8.073	1620.4	3169.81	2.42
1	6	167 nM	10	83.64	941.89	2.77		2	12	200 nM	10.04	36.72	1896.23	2.31		3	6	500 nM	10.404	73.94	3142.71	2.42
1	6	167 nM	14	168.28	993.08	2.51		2	12	200 nM	13.982	125.66	1923.3	2.24		3	6	500 nM	14.345	175.66	3124.3	2.51
1	6	167 nM	18	196.67	943.17	2.41		2	12	200 nM	17.982	168.59	1923.44	2.56		3	6	500 nM	18.346	204.71	3127.19	2.17
1	6	167 nM	22	206.31	984.18	2.48		2	12	200 nM	21.982	190.52	1941.84	2.08		3	6	500 nM	22.345	224.5	3064.03	2.35
1	6	167 nM	26	211.46	1021.93	2.34		2	12	200 nM	25.983	198.24	1974.69	2.33		3	6	500 nM	26.345	233.43	2999.16	2.3
1	6	167 nM	30	213.24	1042.48	2.62		2	12	200 nM	29.983	205.38	1971.41	2.68		3	6	500 nM	30.344	234.74	3002.13	2.41
1	6	167 nM	34	211.69	1010.11	2.47		2	12	200 nM	33.98	210.98	1980.26	2.71		3	6	500 nM	34.345	236.24	3052.37	2.34
1	6	167 nM	38	208.38	1064.28	2.37		2	12	200 nM	37.982	214.93	1969.5	2.12		3	6	500 nM	38.346	229.31	3050.38	2.21
1	6	167 nM	42	213.29	963.42	2.46		2	12	200 nM	41.983	231.85	1937.56	2.14		3	6	500 nM	42.346	225.81	3072.69	2.15
1	6	167 nM	46	218.72	934.07	2.51		2	12	200 nM	45.983	233.11	1954.91	1.99		3	6	500 nM	46.345	232.67	3076.84	2.33
1	6	167 nM	50	223.22	908.85	2.46		2	12	200 nM	49.983	248.86	1905.39	2.31		3	6	500 nM	50.342	227.55	3026.55	2.25
1	6	167 nM	54	222.49	874.18	2.17		2	12	200 nM	53.983	249.62	1908.67	2.34		3	6	500 nM	54.346	237.8	3073.47	2.06
1	6	167 nM	58	225.32	894.82	2.24		2	12	200 nM	57.983	246.28	1911.61	2.4		3	6	500 nM	58.346	240.53	3041.65	2.36
1	6	167 nM	62	222.56	979.5	2.48		2	12	200 nM	61.982	255.19	1887.72	2.15		3	6	500 nM	62.346	241.54	3037.43	2.33
1	6	167 nM	66	226.19	969.64	2.66		2	12	200 nM	65.983	247.71	1927.93	2.48		3	6	500 nM	66.345	240.48	3041.42	2.1
1	6	167 nM	70	225.58	959.85	2.64		2	12	200 nM	69.983	238.27	1963.52	1.89		3	6	500 nM	70.346	232.67	3049.71	2.38
1	6	167 nM	74	223.68	982.19	2.61		2	12	200 nM	73.982	238.95	1972.61	2.13		3	6	500 nM	74.345	241.2	3051.35	2.63
1	6	167 nM	78	223.44	1062.13	2.48		2	12	200 nM	77.981	239.8	1930.64	2.33		3	6	500 nM	78.347	243.75	3065.3	2.44
1	6	167 nM	82	228.07	1028.25	2.58		2	12	200 nM	81.983	233.13	1903.98	2.1		3	6	500 nM	82.345	248.15	3047.17	2.13
1	6	167 nM	86	224.92	1034.36	2.44		2	12	200 nM	85.983	254.64	1760.7	2.28		3	6	500 nM	86.347	252.26	3063.19	2.22
1	6	167 nM	90	228.24	1019.62	2.55		2	12	200 nM	89.983	259.13	1743.06	2.31		3	6	500 nM	90.347	247.28	2985.45	2.34
1	6	167 nM	94	229.86	964.96	2.51		2	12	200 nM	93.983	261.83	1702.07	2.26		3	6	500 nM	94.346	250.91	3050.76	2.85
1	6	167 nM	98	226.57	1005.23	2.81		2	12	200 nM	97.983	264.04	1670.91	2.22		3	6	500 nM	98.345	253.64	3072.16	2.3
1	7	167 nM	0	1675.38	655.55	2.31		2	1	500 nM	0.079	1722.31	789.96	2.76		3	7	500 nM	0.071	3047.35	1893.11	2.62
1	7	167 nM	4	1609.05	659.81	2.37		2	1	500 nM	4.078	1738.8	782.02	2.27		3	7	500 nM	4.072	3025.86	1886.63	2.35
1	7	167 nM	8	1623.03	651.58	2.33		2	1	500 nM	8.077	1758.4	751.68	2.37		3	7	500 nM	8.071	3027.41	1888.73	2.5
1	7	167 nM	10	69.87	641.26	2.32		2	1	500 nM	10.042	41.52	728.51	2.48		3	7	500 nM	10.438	72.86	1611.01	2.27
1	7	167 nM	14	207.03	658.17	2.62		2	1	500 nM	13.983	100.94	727.74	2.12		3	7	500 nM	14.381	229.09	1621.81	2.66
1	7	167 nM	18	280.97	646.93	2.83		2	1	500 nM	17.982	120.83	733.55	2.38		3	7	500 nM	18.38	295.86	1634.9	2.17
1	7	167 nM	22	321.93	650.13	2.74		2	1	500 nM	21.981	130.72	748.73	2.18		3	7	500 nM	22.377	337.36	1647	2.16
1	7	167 nM	26	349.2	647.76	2.68		2	1	500 nM	25.982	134.98	770.89	2.18		3	7	500 nM	26.382	363.12	1637.5	2.62
1	7	167 nM	30	356.16	640.84	2.37		2	1	500 nM	29.982	136.08	771.9	1.96		3	7	500 nM	30.38	378.57	1656.36	2.58
1	7	167 nM	34	364.61	639.48	2.52		2	1	500 nM	33.982	142.21	777.79	2.22		3	7	500 nM	34.38	395.32	1630.39	2.76
1	7	167 nM	38	360.25	641.27	2.93		2	1	500 nM	37.982	142.65	793.29	2.54		3	7	500 nM	38.381	402.11	1653.02	2.46
1	7	167 nM	42	382.94	644.58	2.76		2	1	500 nM	41.983	142.97	794.62	2.27		3	7	500 nM	42.38	404.15	1656.56	2.6
1	7	167 nM	46	372.38	637.25	2.54		2	1	500 nM	45.983	147.18	802.9	2.47		3	7	500 nM	46.381	406.51	1656.26	2.27
1	7	167 nM	50	375.62	638.88	2.33		2	1	500 nM	49.982	148.7	794.11	2.56		3	7	500 nM	50.38	411.57	1648.63	2.67
1	7	167 nM	54	384.16	633.7	2.41		2	1	500 nM	53.981	153.1	784.58	2.55		3	7	500 nM	54.381	420.4	1633.14	2.67
1	7	167 nM	58	400.5	645.01	2.43		2	1	500 nM	57.981	154.81	779.42	2.39		3	7	500 nM	58.38	427.08	1633.04	2.49
1	7	167 nM	62	398.33	636.39	2.55		2	1	500 nM	61.978	158.2	762.4	2.15		3	7	500 nM	62.382	428.92	1628.88	2.53
1	7	167 nM	66	398.57	637.34	2.28		2	1	500 nM	65.982	159.37	769.05	2.7		3	7	500 nM	66.38	428.17	1629.3	2.17
1	7	167 nM	70	406.15	645.83	2.71		2	1	500 nM	69.979	161.25	752.91	2.53		3	7	500 nM	70.38	434.38	1620.71	2.55
1	7	167 nM	74	412.46	645.43	2.47		2	1	500 nM	73.979	160.07	759.26	2.26		3	7	500 nM	74.377	434.03	1610.59	2.23
1	7	167 nM	78	401.29	635.09	3.04		2	1	500 nM	77.978	163.19	768.23	2.57		3	7	500 nM	78.382	436.64	1629.48	2.33
1	7	167 nM	82	399.64	634.87	2.47		2	1	500 nM	81.982	166.92	758.6	2.31		3	7	500 nM	82.383	434.84	1622.08	2.76
1	7	167 nM	86	402.86	642.11	2.46		2	1	500 nM	85.982	168.8	765.56	2.38		3	7	500 nM	86.382	437.93	1618.53	2.38
1	7	167 nM	90	404.98	640.58	2.59		2	1	500 nM	89.978	172	758.96	2.2		3	7	500 nM	90.381	440.53	1614.91	1.97
1	7	167 nM	94	408.8	634.39	2.62		2	1	500 nM	93.982	174.13	760.01	2.02		3	7	500 nM	94.38	438.39	1629.58	2.64
1	7	167 nM	98	419.38	639.36	2.64		2	1	500 nM	97.982	178.6	744.99	2.31		3	7	500 nM	98.381	436	1639.75	2.16
1	8	167 nM	0	738.26	187.6	2.22		2	2	500 nM	0.08	1965.66	372.46	2.1		3	8	500 nM	0.078	807.3	1029.2	2.37
1	8	167 nM	4	745.79	190.03	2.29		2	2	500 nM	4.08	1976.37	368.86	2.17		3	8	500 nM	4.072	815.73	1035.94	2.34
1	8	167 nM	8	773.98	187.58	2.14		2	2	500 nM	8.075	1971.95	369.59	3.2		3	8	500 nM	8.076	831.34	1050.89	2.4
1	8	167 nM	10	31.12	171.7	2.24		2	2	500 nM	10.06	73.22	353.84	2.02		3	8	500 nM	10.405	57.91	1009.98	2.5
1	8	167 nM	14	121.62	197.94	2.35		2	2	500 nM	13.997	191.57	361.43	2.45		3	8	500 nM	14.341	159.88	1053.77	1.97
1	8	167 nM	18	156.89	181.39	2.31		2	2	500 nM	17.997	235.7	361.34	2.03		3	8	500 nM	18.342	196.59	1016.43	2.1
1	8	167 nM	22	177.03	188.05	2.37		2	2	500 nM	21.995	263.95	358.65	2.31		3	8	500 nM	22.341	220.4	1028.93	2.42
1	8	167 nM	26	191.33	191.35	2.41		2	2	500 nM	25.997	275.58	370.18	2.02		3	8	500 nM	26.336	225.64	1055.84	2.23
1	8	167 nM	30	189.3	185.74	2.21		2	2	500 nM	29.997	280.32	349.87	2.28		3	8	500 nM	30.342	231.69	1042.06	2.28
1	8	167 nM	34	181.18	172.07	2.58		2	2	500 nM	33.997	285.06	343.82	2.14		3	8	500 nM	34.337	236.84	1005.11	2.19
1	8	167 nM	38	191.6	178.62	2.63		2	2	500 nM	38.001	284.86	334.24	2.13		3	8	500 nM	38.342	238.48	977.09	2.42
1	8	167 nM	42	188.55	180.43	2.54		2	2	500 nM	41.997	282.75	331.98	2.03		3	8	500 nM	42.34	235.29	1027.62	2.3
1	8	167 nM	46	203.3	184.1	2.47		2	2	500 nM	45.997	287.04	338.07	2.26		3	8	500 nM	46.338	235.77	1018.96	2.26
1	8	167 nM	50	211.6	199.8	2.36		2	2	500 nM	49.997	284.89	339.91	2.92		3	8	500 nM	50.342	243.48	1038.78	2.39
1	8	167 nM	54	223.01	206.36	2.5		2	2	500 nM	54.002	286.2	350.02	2.18		3	8	500 nM	54.342	246.14	1049.73	2.26
1	8	167 nM	58	216.92	203.51	2.65		2	2	500 nM	57.998	290.06	343.4	2.36		3	8	500 nM	58.337	245.13	1057.7	3.02
1	8	167 nM	62	208.21	198.69	2.19		2	2	500 nM	61.999	296.38	358.26	2.49		3	8	500 nM	62.342	244.97	1028.34	2.54
1	8	167 nM	66	204.05	189.64	2.22		2	2	500 nM	65.997	292.75	351.76	2.38		3	8	500 nM	66.342	244.07	1030.77	2.18
1	8	167 nM	70	204.84	186.55	2.32		2	2	500 nM	69.997	292.77	345.46	2.36		3	8	500 nM	70.341	245.67	1063.83	1.88
1	8	167 nM	74	211.95	191.34	2.21		2	2	500 nM	73.997	289.33	351.83	2.01		3	8	500 nM	74.341	250.78	1042.85	2.08
1	8	167 nM	78	199.81	195.47	2.3		2	2	500 nM	78.001	291.1	347.31	2.17		3	8	500 nM	78.343	255.33	1055.73	2.2
1	8	167 nM	82	196.38	182.62	2.4		2	2	500 nM	81.997	294.51	360.66	2.45		3	8	500 nM	82.342	247.12	1083.33	2.05
1	8	167 nM	86	195.28	171.72	2.28		2	2	500 nM	85.997	294.47	354	2.23		3	8	500 nM	86.338	248.31	1100.93	2.21
[truncated: 887 more rows]

## Sheet: Figure4F
Replicate	Technical replicate	TRIM37 rescue construct	Induction	Condition	Intensity	DMSO average	Percent DMSO
1	1	WT	DMSO	DMSO	3462356063	3.45317e+09	1.00266
1	2	WT	DMSO	DMSO	3443981178	3.45317e+09	0.997339
1	1	WT	DOX	DMSO	2032411599	1.89687e+09	1.07145
1	2	WT	DOX	DMSO	1761332856	1.89687e+09	0.928546
1	1	WT	DMSO	167 nM	1531756286	3.45317e+09	0.44358
1	2	WT	DMSO	167 nM	1473118450	3.45317e+09	0.426599
1	1	WT	DOX	167 nM	419367339	1.89687e+09	0.221084
1	2	WT	DOX	167 nM	326906294	1.89687e+09	0.17234
1	1	WT	DMSO	500 nM	872249686	3.45317e+09	0.252594
1	2	WT	DMSO	500 nM	1325130405	3.45317e+09	0.383743
1	1	WT	DOX	500 nM	107333195	1.89687e+09	0.0565843
1	2	WT	DOX	500 nM	109193314	1.89687e+09	0.0575649
1	1	C18R	DMSO	DMSO	3595473932	3.44762e+09	1.04288
1	2	C18R	DMSO	DMSO	3299771767	3.44762e+09	0.957115
1	1	C18R	DOX	DMSO	3729826113	3719319582	1.00282
1	2	C18R	DOX	DMSO	3708813051	3719319582	0.997175
1	1	C18R	DMSO	167 nM	3044326051	3.44762e+09	0.883022
1	2	C18R	DMSO	167 nM	2623655326	3.44762e+09	0.761004
1	1	C18R	DOX	167 nM	2284662224	3719319582	0.614269
1	2	C18R	DOX	167 nM	2252375329	3719319582	0.605588
1	1	C18R	DMSO	500 nM	1918448056	3.44762e+09	0.556455
1	2	C18R	DMSO	500 nM	2126506963	3.44762e+09	0.616804
1	1	C18R	DOX	500 nM	1575722724	3719319582	0.423659
1	2	C18R	DOX	500 nM	1532831135	3719319582	0.412127
2	1	WT	DMSO	167 nM	1767149368	3711989313	0.476065
2	2	WT	DMSO	167 nM	1937912499	3711989313	0.522068
2	1	WT	DOX	167 nM	450392778	1751161903	0.257197
2	2	WT	DOX	167 nM	370704486	1751161903	0.211691
2	1	WT	DMSO	500 nM	1611850010	3711989313	0.434228
2	2	WT	DMSO	500 nM	1561193137	3711989313	0.420581
2	1	WT	DOX	500 nM	49348762	1751161903	0.0281806
2	2	WT	DOX	500 nM	63594408	1751161903	0.0363156
2	1	WT	DMSO	DMSO	3779554933	3711989313	1.0182
2	2	WT	DMSO	DMSO	3644423693	3711989313	0.981798
2	1	WT	DOX	DMSO	1744223236	1751161903	0.996038
2	2	WT	DOX	DMSO	1758100570	1751161903	1.00396
2	1	C18R	DMSO	167 nM	2557223915	3.61827e+09	0.706753
2	2	C18R	DMSO	167 nM	3011354918	3.61827e+09	0.832264
2	1	C18R	DOX	167 nM	2151829015	3.43848e+09	0.625808
2	2	C18R	DOX	167 nM	2220884896	3.43848e+09	0.645891
2	1	C18R	DMSO	500 nM	2167051164	3.61827e+09	0.598919
2	2	C18R	DMSO	500 nM	2175968886	3.61827e+09	0.601384
2	1	C18R	DOX	500 nM	1194145611	3.43848e+09	0.347289
2	2	C18R	DOX	500 nM	1417905831	3.43848e+09	0.412364
2	1	C18R	DMSO	DMSO	3515473710	3.61827e+09	0.97159
2	2	C18R	DMSO	DMSO	3721064181	3.61827e+09	1.02841
2	1	C18R	DOX	DMSO	3254786931	3.43848e+09	0.946577
2	2	C18R	DOX	DMSO	3622175322	3.43848e+09	1.05342
3	1	WT	DMSO	DMSO	3823677989	3729964094	1.02512
3	2	WT	DMSO	DMSO	3636250199	3729964094	0.974875
3	1	WT	DOX	DMSO	4012381825	3773571755	1.06328
3	2	WT	DOX	DMSO	3534761685	3773571755	0.936715
3	1	WT	DMSO	167 nM	1890132104	3729964094	0.506743
3	2	WT	DMSO	167 nM	1843355335	3729964094	0.494202
3	1	WT	DOX	167 nM	830166797	3773571755	0.219995
3	2	WT	DOX	167 nM	718177459	3773571755	0.190318
3	1	WT	DMSO	500 nM	1362626597	3729964094	0.365319
3	2	WT	DMSO	500 nM	1269798333	3729964094	0.340432
3	1	WT	DOX	500 nM	67259959	3773571755	0.017824
3	2	WT	DOX	500 nM	39111306	3773571755	0.0103645
3	1	C18R	DMSO	DMSO	3586129939	3.3804e+09	1.06086
3	2	C18R	DMSO	DMSO	3174664670	3.3804e+09	0.93914
3	1	C18R	DOX	DMSO	3860305591	3772928890	1.02316
3	2	C18R	DOX	DMSO	3685552189	3772928890	0.976841
3	1	C18R	DMSO	167 nM	2482560695	3.3804e+09	0.734399
3	2	C18R	DMSO	167 nM	2092331434	3.3804e+09	0.61896
3	1	C18R	DOX	167 nM	1734805838	3772928890	0.459803
3	2	C18R	DOX	167 nM	1757774279	3772928890	0.465891
3	1	C18R	DMSO	500 nM	1684525019	3.3804e+09	0.498322
3	2	C18R	DMSO	500 nM	1609096203	3.3804e+09	0.476008
3	1	C18R	DOX	500 nM	1010726890	3772928890	0.267889
3	2	C18R	DOX	500 nM	1112740171	3772928890	0.294927
4	1	WT	DMSO	DMSO	4095265150	3.92337e+09	1.04381
4	2	WT	DMSO	DMSO	3751479847	3.92337e+09	0.956188
4	1	WT	DOX	DMSO	3137110699	3725470931	0.842071
4	2	WT	DOX	DMSO	4313831163	3725470931	1.15793
4	1	WT	DMSO	167 nM	2034013205	3.92337e+09	0.518435
4	2	WT	DMSO	167 nM	1658539943	3.92337e+09	0.422733
4	1	WT	DOX	167 nM	622624848	3725470931	0.167126
4	2	WT	DOX	167 nM	794914741	3725470931	0.213373
4	1	WT	DMSO	500 nM	1214501239	3.92337e+09	0.309555
4	2	WT	DMSO	500 nM	1101532196	3.92337e+09	0.280762
4	1	WT	DOX	500 nM	80854490	3725470931	0.0217032
4	2	WT	DOX	500 nM	69837007	3725470931	0.0187458
4	1	C18R	DMSO	DMSO	3763146000	3599153954	1.04556
4	2	C18R	DMSO	DMSO	3435161908	3599153954	0.954436
4	1	C18R	DOX	DMSO	3851718154	3.6492e+09	1.0555
4	2	C18R	DOX	DMSO	3446690469	3.6492e+09	0.944505
4	1	C18R	DMSO	167 nM	2806731411	3599153954	0.779831
4	2	C18R	DMSO	167 nM	2216931050	3599153954	0.615959
4	1	C18R	DOX	167 nM	2050430729	3.6492e+09	0.561884
4	2	C18R	DOX	167 nM	1990733110	3.6492e+09	0.545525
4	1	C18R	DMSO	500 nM	1921864607	3599153954	0.533977
4	2	C18R	DMSO	500 nM	1992799324	3599153954	0.553685
4	1	C18R	DOX	500 nM	1275383744	3.6492e+09	0.349496
4	2	C18R	DOX	500 nM	1395323817	3.6492e+09	0.382364

## Sheet: Figure4G
Replicate	Technical replicate	TRIM37 rescue construct	Induction	Intensity	DMSO	Percent DMSO
1	1	C18R	DMSO	803039065	8.48789e+08	0.946099
1	2	C18R	DMSO	894539526	8.48789e+08	1.0539
1	1	C18R	DOX	331128491	8.48789e+08	0.390119
1	2	C18R	DOX	431518000	8.48789e+08	0.508392
2	1	C18R	DMSO	1672400742	1765316119	0.947366
2	2	C18R	DMSO	1858231496	1765316119	1.05263
2	1	C18R	DOX	1334020808	1765316119	0.755684
2	2	C18R	DOX	1354402847	1765316119	0.76723
3	1	C18R	DMSO	2140275828	2149250440	0.995824
3	2	C18R	DMSO	2158225052	2149250440	1.00418
3	1	C18R	DOX	1301767920	2149250440	0.605685
3	2	C18R	DOX	1387393125	2149250440	0.645524
1	1	WT	DMSO	739991195	7.86199e+08	0.941226
1	2	WT	DMSO	832406546	7.86199e+08	1.05877
1	1	WT	DOX	294939077	7.86199e+08	0.375146
1	2	WT	DOX	238868498	7.86199e+08	0.303827
2	1	WT	DMSO	2127680195	2214893315	0.960624
2	2	WT	DMSO	2302106435	2214893315	1.03938
2	1	WT	DOX	863187598	2214893315	0.38972
2	2	WT	DOX	753553577	2214893315	0.340221
3	1	WT	DMSO	1864167231	1853915547	1.00553
3	2	WT	DMSO	1843663863	1853915547	0.99447
3	1	WT	DOX	655552900	1853915547	0.353605
3	2	WT	DOX	1018666699	1853915547	0.549468

## Sheet: Figure4H
Replicate	Line	Induction	Intensity	Percent DMSO
1	WT	DMSO	5280.19	1
1	WT	DOX	842.382	0.159536
1	dTP53	DMSO	2676.47	1
1	dTP53	DOX	2558.67	0.955988
1	dTRIM37	DMSO	7883.57	1
1	dTRIM37	DOX	405.264	0.0514062
2	WT	DMSO	4385.35	1
2	WT	DOX	923.648	0.210621
2	dTP53	DMSO	2086.25	1
2	dTP53	DOX	1762.16	0.844657
2	dTRIM37	DMSO	6104.44	1
2	dTRIM37	DOX	109.343	0.017912
3	WT	DMSO	4893.17	1
3	WT	DOX	680.75	0.139122
3	dTP53	DMSO	1970.17	1
3	dTP53	DOX	2736.31	1.38887
3	dTRIM37	DMSO	7390.91	1
3	dTRIM37	DOX	253.149	0.0342514
