# Supplementary material for: Global cellular response to chemical perturbation of PLK4 activity and abnormal centrosome number
Source: eLife. 2022 Jun 27;11:e73944. doi: 10.7554/eLife.73944 (PMC9236612; doi:10.7554/eLife.73944)
Supplement: Figure 5—source data 1. [file elife-73944-fig5-data1.xlsx]

## Sheet: Figure5A
Replicate	Line	Centrinone	Time		Summary
1	WT	DMSO	25
1	WT	DMSO	25		Replicate	Line	Centrinone	Number of cells		Replicate	Line	Centrinone	Number of cells
1	WT	DMSO	25		1	WT	DMSO	55		1	dTRIM37	DMSO	55
1	WT	DMSO	25		1	WT	50 nM	55		1	dTRIM37	50 nM	55
1	WT	DMSO	20		1	WT	125 nM	55		1	dTRIM37	125 nM	55
1	WT	DMSO	25		1	WT	150 nM	55		1	dTRIM37	150 nM	55
1	WT	DMSO	25		1	WT	167 nM	55		1	dTRIM37	167 nM	55
1	WT	DMSO	25		1	WT	200 nM	55		1	dTRIM37	200 nM	55
1	WT	DMSO	35		1	WT	500 nM	30		1	dTRIM37	500 nM	55
1	WT	DMSO	30		2	WT	DMSO	55		2	dTRIM37	DMSO	55
1	WT	DMSO	25		2	WT	50 nM	55		2	dTRIM37	50 nM	55
1	WT	DMSO	30		2	WT	125 nM	55		2	dTRIM37	125 nM	55
1	WT	DMSO	25		2	WT	150 nM	55		2	dTRIM37	150 nM	55
1	WT	DMSO	25		2	WT	167 nM	55		2	dTRIM37	167 nM	55
1	WT	DMSO	25		2	WT	200 nM	55		2	dTRIM37	200 nM	55
1	WT	DMSO	25		2	WT	500 nM	34		2	dTRIM37	500 nM	55
1	WT	DMSO	25		3	WT	DMSO	100		3	dTRIM37	DMSO	50
1	WT	DMSO	25		3	WT	50 nM	100		3	dTRIM37	50 nM	50
1	WT	DMSO	25		3	WT	125 nM	100		3	dTRIM37	125 nM	50
1	WT	DMSO	30		3	WT	150 nM	100		3	dTRIM37	150 nM	50
1	WT	DMSO	25		3	WT	167 nM	100		3	dTRIM37	167 nM	50
1	WT	DMSO	25		3	WT	200 nM	100		3	dTRIM37	200 nM	50
1	WT	DMSO	20		3	WT	500 nM	100		3	dTRIM37	500 nM	50
1	WT	DMSO	25
1	WT	DMSO	30
1	WT	DMSO	25
1	WT	DMSO	25
1	WT	DMSO	30
1	WT	DMSO	25
1	WT	DMSO	20
1	WT	DMSO	25
1	WT	DMSO	25
1	WT	DMSO	25
1	WT	DMSO	30
1	WT	DMSO	25
1	WT	DMSO	30
1	WT	DMSO	25
1	WT	DMSO	30
1	WT	DMSO	25
1	WT	DMSO	25
1	WT	DMSO	25
1	WT	DMSO	25
1	WT	DMSO	20
1	WT	DMSO	25
1	WT	DMSO	25
1	WT	DMSO	25
1	WT	DMSO	40
1	WT	DMSO	30
1	WT	DMSO	20
1	WT	DMSO	25
1	WT	DMSO	25
1	WT	DMSO	25
1	WT	DMSO	25
1	WT	DMSO	25
1	WT	DMSO	25
2	WT	DMSO	20
2	WT	DMSO	25
2	WT	DMSO	25
2	WT	DMSO	25
2	WT	DMSO	25
2	WT	DMSO	20
2	WT	DMSO	25
2	WT	DMSO	25
2	WT	DMSO	30
2	WT	DMSO	25
2	WT	DMSO	20
2	WT	DMSO	30
2	WT	DMSO	25
2	WT	DMSO	30
2	WT	DMSO	25
2	WT	DMSO	25
2	WT	DMSO	20
2	WT	DMSO	30
2	WT	DMSO	25
2	WT	DMSO	35
2	WT	DMSO	20
2	WT	DMSO	25
2	WT	DMSO	25
2	WT	DMSO	25
2	WT	DMSO	25
2	WT	DMSO	25
2	WT	DMSO	25
2	WT	DMSO	30
2	WT	DMSO	25
2	WT	DMSO	25
2	WT	DMSO	25
2	WT	DMSO	20
2	WT	DMSO	25
2	WT	DMSO	25
2	WT	DMSO	35
2	WT	DMSO	25
2	WT	DMSO	25
2	WT	DMSO	25
2	WT	DMSO	20
2	WT	DMSO	25
2	WT	DMSO	20
2	WT	DMSO	25
2	WT	DMSO	25
2	WT	DMSO	20
2	WT	DMSO	30
2	WT	DMSO	25
2	WT	DMSO	20
2	WT	DMSO	25
2	WT	DMSO	20
2	WT	DMSO	25
2	WT	DMSO	25
2	WT	DMSO	25
2	WT	DMSO	25
2	WT	DMSO	25
2	WT	DMSO	25
3	WT	DMSO	20
3	WT	DMSO	20
3	WT	DMSO	25
3	WT	DMSO	30
3	WT	DMSO	25
3	WT	DMSO	25
3	WT	DMSO	30
3	WT	DMSO	25
3	WT	DMSO	25
3	WT	DMSO	25
3	WT	DMSO	25
3	WT	DMSO	25
3	WT	DMSO	20
3	WT	DMSO	25
3	WT	DMSO	25
3	WT	DMSO	20
3	WT	DMSO	20
3	WT	DMSO	25
3	WT	DMSO	25
3	WT	DMSO	25
3	WT	DMSO	25
3	WT	DMSO	25
3	WT	DMSO	25
3	WT	DMSO	25
3	WT	DMSO	25
3	WT	DMSO	20
3	WT	DMSO	25
3	WT	DMSO	25
3	WT	DMSO	25
3	WT	DMSO	20
3	WT	DMSO	25
3	WT	DMSO	20
3	WT	DMSO	20
3	WT	DMSO	20
3	WT	DMSO	25
3	WT	DMSO	25
3	WT	DMSO	20
3	WT	DMSO	20
3	WT	DMSO	25
3	WT	DMSO	20
3	WT	DMSO	20
3	WT	DMSO	20
3	WT	DMSO	30
3	WT	DMSO	25
3	WT	DMSO	30
3	WT	DMSO	20
3	WT	DMSO	20
3	WT	DMSO	25
3	WT	DMSO	30
3	WT	DMSO	20
3	WT	DMSO	20
3	WT	DMSO	30
3	WT	DMSO	25
3	WT	DMSO	25
3	WT	DMSO	25
3	WT	DMSO	20
3	WT	DMSO	25
3	WT	DMSO	25
3	WT	DMSO	25
3	WT	DMSO	25
3	WT	DMSO	20
3	WT	DMSO	20
3	WT	DMSO	20
3	WT	DMSO	25
3	WT	DMSO	20
3	WT	DMSO	20
3	WT	DMSO	25
3	WT	DMSO	20
3	WT	DMSO	25
3	WT	DMSO	25
3	WT	DMSO	25
3	WT	DMSO	20
3	WT	DMSO	20
3	WT	DMSO	20
3	WT	DMSO	20
3	WT	DMSO	25
3	WT	DMSO	20
3	WT	DMSO	25
3	WT	DMSO	25
3	WT	DMSO	20
3	WT	DMSO	25
3	WT	DMSO	20
3	WT	DMSO	25
3	WT	DMSO	20
3	WT	DMSO	20
3	WT	DMSO	20
3	WT	DMSO	25
3	WT	DMSO	25
3	WT	DMSO	20
3	WT	DMSO	20
3	WT	DMSO	25
3	WT	DMSO	30
3	WT	DMSO	25
3	WT	DMSO	20
3	WT	DMSO	25
3	WT	DMSO	20
3	WT	DMSO	25
3	WT	DMSO	25
3	WT	DMSO	20
3	WT	DMSO	25
1	WT	50 nM	25
1	WT	50 nM	25
1	WT	50 nM	20
1	WT	50 nM	25
1	WT	50 nM	25
1	WT	50 nM	20
1	WT	50 nM	25
1	WT	50 nM	20
1	WT	50 nM	25
1	WT	50 nM	30
1	WT	50 nM	25
1	WT	50 nM	25
1	WT	50 nM	25
1	WT	50 nM	25
1	WT	50 nM	25
1	WT	50 nM	25
1	WT	50 nM	25
1	WT	50 nM	30
1	WT	50 nM	25
1	WT	50 nM	20
1	WT	50 nM	25
1	WT	50 nM	25
1	WT	50 nM	35
1	WT	50 nM	25
1	WT	50 nM	25
1	WT	50 nM	25
1	WT	50 nM	30
1	WT	50 nM	25
1	WT	50 nM	25
1	WT	50 nM	30
1	WT	50 nM	25
1	WT	50 nM	20
1	WT	50 nM	25
1	WT	50 nM	25
1	WT	50 nM	25
1	WT	50 nM	40
1	WT	50 nM	20
1	WT	50 nM	25
1	WT	50 nM	20
1	WT	50 nM	30
1	WT	50 nM	20
1	WT	50 nM	25
1	WT	50 nM	25
1	WT	50 nM	25
1	WT	50 nM	25
1	WT	50 nM	25
1	WT	50 nM	25
1	WT	50 nM	25
1	WT	50 nM	25
1	WT	50 nM	20
1	WT	50 nM	25
1	WT	50 nM	25
1	WT	50 nM	25
1	WT	50 nM	25
1	WT	50 nM	20
2	WT	50 nM	30
2	WT	50 nM	20
2	WT	50 nM	20
2	WT	50 nM	30
2	WT	50 nM	25
2	WT	50 nM	20
2	WT	50 nM	25
2	WT	50 nM	20
2	WT	50 nM	25
2	WT	50 nM	20
2	WT	50 nM	20
2	WT	50 nM	25
2	WT	50 nM	25
2	WT	50 nM	25
2	WT	50 nM	20
2	WT	50 nM	20
2	WT	50 nM	25
2	WT	50 nM	30
2	WT	50 nM	25
2	WT	50 nM	30
2	WT	50 nM	20
2	WT	50 nM	20
2	WT	50 nM	25
2	WT	50 nM	30
2	WT	50 nM	20
2	WT	50 nM	30
2	WT	50 nM	25
2	WT	50 nM	25
2	WT	50 nM	20
2	WT	50 nM	20
2	WT	50 nM	20
2	WT	50 nM	25
2	WT	50 nM	25
2	WT	50 nM	25
2	WT	50 nM	25
2	WT	50 nM	25
2	WT	50 nM	25
2	WT	50 nM	20
2	WT	50 nM	25
2	WT	50 nM	20
2	WT	50 nM	25
2	WT	50 nM	20
2	WT	50 nM	25
2	WT	50 nM	25
2	WT	50 nM	25
2	WT	50 nM	25
2	WT	50 nM	25
2	WT	50 nM	25
2	WT	50 nM	25
2	WT	50 nM	25
2	WT	50 nM	25
2	WT	50 nM	20
2	WT	50 nM	25
2	WT	50 nM	25
2	WT	50 nM	25
3	WT	50 nM	20
3	WT	50 nM	25
3	WT	50 nM	20
3	WT	50 nM	25
3	WT	50 nM	25
3	WT	50 nM	25
3	WT	50 nM	20
3	WT	50 nM	25
3	WT	50 nM	25
3	WT	50 nM	25
3	WT	50 nM	25
3	WT	50 nM	25
3	WT	50 nM	25
3	WT	50 nM	25
3	WT	50 nM	20
3	WT	50 nM	25
3	WT	50 nM	25
3	WT	50 nM	25
3	WT	50 nM	25
3	WT	50 nM	25
3	WT	50 nM	20
3	WT	50 nM	25
3	WT	50 nM	20
3	WT	50 nM	20
3	WT	50 nM	20
3	WT	50 nM	25
3	WT	50 nM	20
3	WT	50 nM	25
3	WT	50 nM	25
3	WT	50 nM	20
3	WT	50 nM	25
3	WT	50 nM	25
3	WT	50 nM	20
3	WT	50 nM	20
3	WT	50 nM	25
3	WT	50 nM	20
3	WT	50 nM	20
3	WT	50 nM	25
3	WT	50 nM	25
3	WT	50 nM	25
3	WT	50 nM	25
3	WT	50 nM	25
3	WT	50 nM	20
3	WT	50 nM	25
3	WT	50 nM	25
3	WT	50 nM	30
3	WT	50 nM	20
3	WT	50 nM	25
3	WT	50 nM	20
3	WT	50 nM	25
3	WT	50 nM	20
3	WT	50 nM	25
3	WT	50 nM	25
3	WT	50 nM	25
3	WT	50 nM	20
3	WT	50 nM	25
3	WT	50 nM	20
3	WT	50 nM	20
3	WT	50 nM	20
3	WT	50 nM	20
3	WT	50 nM	25
3	WT	50 nM	30
3	WT	50 nM	25
3	WT	50 nM	20
3	WT	50 nM	25
3	WT	50 nM	25
3	WT	50 nM	25
3	WT	50 nM	20
3	WT	50 nM	20
3	WT	50 nM	20
3	WT	50 nM	20
3	WT	50 nM	25
3	WT	50 nM	20
3	WT	50 nM	20
3	WT	50 nM	20
3	WT	50 nM	20
3	WT	50 nM	25
3	WT	50 nM	25
3	WT	50 nM	25
3	WT	50 nM	20
3	WT	50 nM	25
3	WT	50 nM	25
3	WT	50 nM	25
3	WT	50 nM	20
3	WT	50 nM	20
3	WT	50 nM	20
3	WT	50 nM	25
3	WT	50 nM	25
3	WT	50 nM	20
3	WT	50 nM	40
3	WT	50 nM	25
3	WT	50 nM	25
3	WT	50 nM	20
3	WT	50 nM	25
3	WT	50 nM	25
3	WT	50 nM	35
3	WT	50 nM	25
3	WT	50 nM	20
3	WT	50 nM	25
3	WT	50 nM	25
1	WT	125 nM	40
1	WT	125 nM	35
1	WT	125 nM	30
1	WT	125 nM	25
1	WT	125 nM	25
1	WT	125 nM	20
1	WT	125 nM	25
1	WT	125 nM	40
1	WT	125 nM	25
1	WT	125 nM	25
1	WT	125 nM	25
1	WT	125 nM	40
1	WT	125 nM	25
1	WT	125 nM	50
1	WT	125 nM	25
1	WT	125 nM	45
1	WT	125 nM	25
1	WT	125 nM	35
1	WT	125 nM	20
1	WT	125 nM	20
1	WT	125 nM	25
1	WT	125 nM	25
1	WT	125 nM	25
1	WT	125 nM	40
1	WT	125 nM	45
1	WT	125 nM	35
1	WT	125 nM	20
1	WT	125 nM	25
1	WT	125 nM	25
1	WT	125 nM	25
1	WT	125 nM	35
1	WT	125 nM	30
1	WT	125 nM	20
1	WT	125 nM	35
1	WT	125 nM	25
1	WT	125 nM	25
1	WT	125 nM	40
1	WT	125 nM	25
1	WT	125 nM	25
1	WT	125 nM	40
1	WT	125 nM	25
1	WT	125 nM	35
1	WT	125 nM	20
1	WT	125 nM	25
1	WT	125 nM	40
1	WT	125 nM	25
1	WT	125 nM	35
1	WT	125 nM	25
1	WT	125 nM	25
1	WT	125 nM	25
1	WT	125 nM	25
1	WT	125 nM	50
1	WT	125 nM	25
1	WT	125 nM	25
1	WT	125 nM	45
2	WT	125 nM	30
2	WT	125 nM	25
2	WT	125 nM	25
2	WT	125 nM	20
2	WT	125 nM	60
2	WT	125 nM	25
2	WT	125 nM	20
2	WT	125 nM	25
2	WT	125 nM	30
2	WT	125 nM	50
2	WT	125 nM	20
2	WT	125 nM	20
2	WT	125 nM	30
2	WT	125 nM	40
2	WT	125 nM	20
2	WT	125 nM	20
2	WT	125 nM	35
2	WT	125 nM	25
2	WT	125 nM	25
2	WT	125 nM	35
2	WT	125 nM	45
2	WT	125 nM	25
2	WT	125 nM	20
2	WT	125 nM	25
2	WT	125 nM	25
2	WT	125 nM	35
2	WT	125 nM	45
2	WT	125 nM	40
2	WT	125 nM	20
2	WT	125 nM	25
2	WT	125 nM	30
2	WT	125 nM	25
2	WT	125 nM	35
2	WT	125 nM	25
2	WT	125 nM	25
2	WT	125 nM	25
2	WT	125 nM	25
2	WT	125 nM	35
2	WT	125 nM	20
2	WT	125 nM	25
2	WT	125 nM	30
2	WT	125 nM	25
2	WT	125 nM	20
2	WT	125 nM	20
2	WT	125 nM	20
2	WT	125 nM	25
2	WT	125 nM	35
2	WT	125 nM	20
2	WT	125 nM	25
2	WT	125 nM	20
2	WT	125 nM	25
2	WT	125 nM	30
2	WT	125 nM	25
2	WT	125 nM	30
2	WT	125 nM	50
3	WT	125 nM	15
3	WT	125 nM	20
3	WT	125 nM	25
3	WT	125 nM	20
3	WT	125 nM	20
3	WT	125 nM	20
3	WT	125 nM	50
3	WT	125 nM	40
3	WT	125 nM	35
3	WT	125 nM	25
3	WT	125 nM	20
3	WT	125 nM	20
3	WT	125 nM	25
3	WT	125 nM	25
3	WT	125 nM	25
3	WT	125 nM	30
3	WT	125 nM	25
3	WT	125 nM	25
3	WT	125 nM	20
3	WT	125 nM	20
3	WT	125 nM	25
3	WT	125 nM	20
3	WT	125 nM	20
3	WT	125 nM	25
3	WT	125 nM	20
3	WT	125 nM	20
3	WT	125 nM	20
3	WT	125 nM	20
3	WT	125 nM	20
3	WT	125 nM	20
3	WT	125 nM	20
3	WT	125 nM	25
3	WT	125 nM	25
3	WT	125 nM	25
3	WT	125 nM	20
3	WT	125 nM	20
3	WT	125 nM	25
3	WT	125 nM	25
3	WT	125 nM	25
3	WT	125 nM	20
3	WT	125 nM	30
3	WT	125 nM	20
3	WT	125 nM	25
3	WT	125 nM	20
3	WT	125 nM	20
3	WT	125 nM	20
3	WT	125 nM	25
3	WT	125 nM	25
3	WT	125 nM	25
3	WT	125 nM	25
3	WT	125 nM	20
3	WT	125 nM	25
3	WT	125 nM	25
3	WT	125 nM	40
3	WT	125 nM	30
3	WT	125 nM	20
3	WT	125 nM	20
3	WT	125 nM	25
3	WT	125 nM	25
3	WT	125 nM	25
3	WT	125 nM	25
3	WT	125 nM	20
3	WT	125 nM	20
3	WT	125 nM	20
3	WT	125 nM	25
3	WT	125 nM	20
3	WT	125 nM	20
3	WT	125 nM	25
3	WT	125 nM	25
3	WT	125 nM	20
3	WT	125 nM	25
3	WT	125 nM	20
3	WT	125 nM	25
3	WT	125 nM	20
3	WT	125 nM	20
3	WT	125 nM	25
3	WT	125 nM	30
3	WT	125 nM	25
3	WT	125 nM	25
3	WT	125 nM	20
3	WT	125 nM	25
3	WT	125 nM	20
3	WT	125 nM	35
3	WT	125 nM	20
3	WT	125 nM	20
3	WT	125 nM	20
3	WT	125 nM	20
3	WT	125 nM	20
3	WT	125 nM	25
3	WT	125 nM	25
3	WT	125 nM	50
3	WT	125 nM	20
3	WT	125 nM	25
3	WT	125 nM	20
3	WT	125 nM	25
3	WT	125 nM	25
3	WT	125 nM	20
3	WT	125 nM	20
3	WT	125 nM	25
3	WT	125 nM	30
1	WT	150 nM	45
1	WT	150 nM	45
1	WT	150 nM	35
1	WT	150 nM	30
1	WT	150 nM	30
1	WT	150 nM	45
1	WT	150 nM	55
1	WT	150 nM	40
1	WT	150 nM	60
1	WT	150 nM	20
1	WT	150 nM	40
1	WT	150 nM	45
1	WT	150 nM	25
1	WT	150 nM	30
1	WT	150 nM	40
1	WT	150 nM	25
1	WT	150 nM	35
1	WT	150 nM	30
1	WT	150 nM	45
1	WT	150 nM	25
1	WT	150 nM	80
1	WT	150 nM	35
1	WT	150 nM	30
1	WT	150 nM	45
1	WT	150 nM	25
1	WT	150 nM	25
1	WT	150 nM	40
1	WT	150 nM	25
1	WT	150 nM	25
1	WT	150 nM	25
1	WT	150 nM	30
1	WT	150 nM	40
1	WT	150 nM	50
1	WT	150 nM	60
1	WT	150 nM	40
1	WT	150 nM	35
1	WT	150 nM	45
1	WT	150 nM	35
1	WT	150 nM	35
1	WT	150 nM	80
1	WT	150 nM	30
1	WT	150 nM	45
1	WT	150 nM	40
1	WT	150 nM	25
1	WT	150 nM	55
1	WT	150 nM	30
1	WT	150 nM	50
1	WT	150 nM	25
1	WT	150 nM	55
1	WT	150 nM	50
1	WT	150 nM	20
1	WT	150 nM	20
1	WT	150 nM	30
1	WT	150 nM	25
1	WT	150 nM	30
2	WT	150 nM	40
2	WT	150 nM	70
2	WT	150 nM	25
2	WT	150 nM	35
2	WT	150 nM	75
2	WT	150 nM	30
2	WT	150 nM	25
2	WT	150 nM	20
2	WT	150 nM	35
2	WT	150 nM	40
2	WT	150 nM	80
2	WT	150 nM	40
2	WT	150 nM	30
2	WT	150 nM	45
2	WT	150 nM	35
2	WT	150 nM	55
2	WT	150 nM	55
2	WT	150 nM	40
2	WT	150 nM	35
2	WT	150 nM	20
2	WT	150 nM	45
2	WT	150 nM	65
2	WT	150 nM	45
2	WT	150 nM	30
2	WT	150 nM	25
2	WT	150 nM	30
2	WT	150 nM	45
2	WT	150 nM	30
2	WT	150 nM	50
2	WT	150 nM	30
2	WT	150 nM	25
2	WT	150 nM	40
2	WT	150 nM	25
2	WT	150 nM	25
2	WT	150 nM	50
2	WT	150 nM	25
2	WT	150 nM	25
2	WT	150 nM	25
2	WT	150 nM	45
2	WT	150 nM	30
2	WT	150 nM	65
2	WT	150 nM	30
2	WT	150 nM	25
2	WT	150 nM	25
2	WT	150 nM	40
2	WT	150 nM	25
2	WT	150 nM	40
2	WT	150 nM	35
2	WT	150 nM	35
2	WT	150 nM	25
2	WT	150 nM	25
2	WT	150 nM	25
2	WT	150 nM	25
2	WT	150 nM	30
2	WT	150 nM	20
3	WT	150 nM	40
3	WT	150 nM	40
3	WT	150 nM	30
3	WT	150 nM	25
3	WT	150 nM	25
3	WT	150 nM	20
3	WT	150 nM	20
3	WT	150 nM	50
3	WT	150 nM	45
3	WT	150 nM	45
3	WT	150 nM	60
3	WT	150 nM	35
3	WT	150 nM	40
3	WT	150 nM	25
3	WT	150 nM	25
3	WT	150 nM	50
3	WT	150 nM	20
3	WT	150 nM	20
3	WT	150 nM	20
3	WT	150 nM	55
3	WT	150 nM	25
3	WT	150 nM	25
3	WT	150 nM	20
3	WT	150 nM	40
3	WT	150 nM	30
3	WT	150 nM	30
3	WT	150 nM	20
3	WT	150 nM	25
3	WT	150 nM	25
3	WT	150 nM	20
3	WT	150 nM	45
3	WT	150 nM	45
3	WT	150 nM	30
3	WT	150 nM	35
3	WT	150 nM	30
3	WT	150 nM	25
3	WT	150 nM	35
3	WT	150 nM	25
3	WT	150 nM	30
3	WT	150 nM	50
3	WT	150 nM	25
3	WT	150 nM	25
3	WT	150 nM	25
3	WT	150 nM	30
3	WT	150 nM	20
3	WT	150 nM	20
3	WT	150 nM	20
3	WT	150 nM	20
3	WT	150 nM	25
3	WT	150 nM	20
3	WT	150 nM	25
3	WT	150 nM	25
3	WT	150 nM	20
3	WT	150 nM	55
3	WT	150 nM	25
3	WT	150 nM	30
3	WT	150 nM	35
3	WT	150 nM	30
3	WT	150 nM	20
3	WT	150 nM	45
3	WT	150 nM	35
3	WT	150 nM	55
3	WT	150 nM	35
3	WT	150 nM	40
3	WT	150 nM	30
3	WT	150 nM	25
3	WT	150 nM	35
3	WT	150 nM	25
3	WT	150 nM	20
3	WT	150 nM	25
3	WT	150 nM	50
3	WT	150 nM	20
3	WT	150 nM	30
3	WT	150 nM	25
3	WT	150 nM	30
3	WT	150 nM	20
3	WT	150 nM	20
3	WT	150 nM	30
3	WT	150 nM	25
3	WT	150 nM	25
3	WT	150 nM	25
3	WT	150 nM	20
3	WT	150 nM	40
3	WT	150 nM	25
3	WT	150 nM	20
3	WT	150 nM	25
3	WT	150 nM	30
3	WT	150 nM	20
3	WT	150 nM	25
3	WT	150 nM	45
3	WT	150 nM	25
3	WT	150 nM	20
3	WT	150 nM	25
3	WT	150 nM	30
3	WT	150 nM	40
3	WT	150 nM	45
3	WT	150 nM	25
3	WT	150 nM	20
3	WT	150 nM	20
3	WT	150 nM	35
1	WT	167 nM	25
1	WT	167 nM	35
1	WT	167 nM	50
1	WT	167 nM	20
1	WT	167 nM	35
1	WT	167 nM	80
1	WT	167 nM	95
1	WT	167 nM	35
1	WT	167 nM	45
1	WT	167 nM	45
1	WT	167 nM	55
1	WT	167 nM	30
1	WT	167 nM	35
1	WT	167 nM	45
1	WT	167 nM	25
1	WT	167 nM	50
1	WT	167 nM	30
1	WT	167 nM	50
1	WT	167 nM	20
1	WT	167 nM	40
1	WT	167 nM	20
1	WT	167 nM	25
1	WT	167 nM	90
1	WT	167 nM	25
1	WT	167 nM	20
1	WT	167 nM	60
1	WT	167 nM	25
1	WT	167 nM	55
1	WT	167 nM	25
1	WT	167 nM	120
1	WT	167 nM	45
1	WT	167 nM	130
1	WT	167 nM	35
1	WT	167 nM	45
1	WT	167 nM	40
1	WT	167 nM	45
1	WT	167 nM	25
1	WT	167 nM	35
1	WT	167 nM	45
1	WT	167 nM	25
1	WT	167 nM	65
1	WT	167 nM	25
1	WT	167 nM	30
1	WT	167 nM	40
1	WT	167 nM	25
1	WT	167 nM	20
1	WT	167 nM	40
1	WT	167 nM	35
1	WT	167 nM	30
1	WT	167 nM	35
1	WT	167 nM	40
1	WT	167 nM	30
1	WT	167 nM	35
1	WT	167 nM	25
1	WT	167 nM	35
2	WT	167 nM	20
2	WT	167 nM	45
2	WT	167 nM	30
2	WT	167 nM	35
2	WT	167 nM	35
2	WT	167 nM	25
2	WT	167 nM	35
2	WT	167 nM	25
2	WT	167 nM	20
2	WT	167 nM	25
2	WT	167 nM	40
2	WT	167 nM	35
2	WT	167 nM	30
2	WT	167 nM	25
2	WT	167 nM	50
2	WT	167 nM	35
2	WT	167 nM	30
2	WT	167 nM	30
2	WT	167 nM	25
2	WT	167 nM	35
2	WT	167 nM	30
2	WT	167 nM	35
2	WT	167 nM	55
2	WT	167 nM	20
2	WT	167 nM	30
2	WT	167 nM	25
2	WT	167 nM	45
2	WT	167 nM	35
2	WT	167 nM	65
2	WT	167 nM	30
2	WT	167 nM	30
2	WT	167 nM	40
2	WT	167 nM	25
2	WT	167 nM	55
2	WT	167 nM	25
2	WT	167 nM	35
2	WT	167 nM	60
2	WT	167 nM	20
2	WT	167 nM	25
2	WT	167 nM	35
2	WT	167 nM	25
2	WT	167 nM	20
2	WT	167 nM	35
2	WT	167 nM	45
2	WT	167 nM	25
2	WT	167 nM	35
2	WT	167 nM	25
2	WT	167 nM	45
2	WT	167 nM	35
2	WT	167 nM	25
2	WT	167 nM	55
2	WT	167 nM	35
2	WT	167 nM	25
2	WT	167 nM	25
2	WT	167 nM	25
3	WT	167 nM	25
3	WT	167 nM	30
3	WT	167 nM	20
3	WT	167 nM	35
3	WT	167 nM	20
3	WT	167 nM	35
3	WT	167 nM	25
3	WT	167 nM	30
3	WT	167 nM	70
3	WT	167 nM	25
3	WT	167 nM	40
3	WT	167 nM	35
3	WT	167 nM	25
3	WT	167 nM	25
3	WT	167 nM	30
3	WT	167 nM	25
3	WT	167 nM	25
3	WT	167 nM	25
3	WT	167 nM	40
3	WT	167 nM	25
3	WT	167 nM	40
3	WT	167 nM	35
3	WT	167 nM	30
3	WT	167 nM	30
3	WT	167 nM	20
3	WT	167 nM	30
3	WT	167 nM	20
3	WT	167 nM	25
3	WT	167 nM	45
3	WT	167 nM	25
3	WT	167 nM	30
3	WT	167 nM	30
3	WT	167 nM	35
3	WT	167 nM	35
3	WT	167 nM	35
3	WT	167 nM	20
3	WT	167 nM	25
3	WT	167 nM	20
3	WT	167 nM	40
3	WT	167 nM	25
3	WT	167 nM	30
3	WT	167 nM	35
3	WT	167 nM	25
3	WT	167 nM	25
3	WT	167 nM	30
3	WT	167 nM	35
3	WT	167 nM	25
3	WT	167 nM	30
3	WT	167 nM	45
3	WT	167 nM	30
3	WT	167 nM	25
3	WT	167 nM	25
3	WT	167 nM	20
3	WT	167 nM	30
3	WT	167 nM	30
3	WT	167 nM	30
3	WT	167 nM	45
3	WT	167 nM	70
3	WT	167 nM	40
3	WT	167 nM	25
3	WT	167 nM	20
3	WT	167 nM	20
3	WT	167 nM	30
3	WT	167 nM	25
3	WT	167 nM	45
3	WT	167 nM	35
3	WT	167 nM	30
3	WT	167 nM	25
3	WT	167 nM	20
3	WT	167 nM	20
3	WT	167 nM	30
3	WT	167 nM	25
3	WT	167 nM	25
3	WT	167 nM	30
3	WT	167 nM	25
3	WT	167 nM	20
3	WT	167 nM	20
3	WT	167 nM	20
3	WT	167 nM	25
3	WT	167 nM	40
3	WT	167 nM	25
3	WT	167 nM	40
3	WT	167 nM	30
3	WT	167 nM	25
3	WT	167 nM	40
3	WT	167 nM	30
3	WT	167 nM	25
3	WT	167 nM	30
3	WT	167 nM	25
3	WT	167 nM	20
3	WT	167 nM	25
3	WT	167 nM	20
3	WT	167 nM	55
3	WT	167 nM	25
3	WT	167 nM	20
3	WT	167 nM	45
3	WT	167 nM	40
3	WT	167 nM	55
3	WT	167 nM	30
3	WT	167 nM	25
1	WT	200 nM	55
1	WT	200 nM	30
1	WT	200 nM	50
1	WT	200 nM	35
1	WT	200 nM	70
1	WT	200 nM	30
1	WT	200 nM	65
1	WT	200 nM	40
1	WT	200 nM	60
1	WT	200 nM	65
1	WT	200 nM	30
1	WT	200 nM	35
1	WT	200 nM	50
1	WT	200 nM	35
1	WT	200 nM	80
1	WT	200 nM	25
1	WT	200 nM	50
1	WT	200 nM	20
1	WT	200 nM	50
1	WT	200 nM	35
1	WT	200 nM	35
1	WT	200 nM	70
1	WT	200 nM	25
1	WT	200 nM	40
1	WT	200 nM	55
1	WT	200 nM	60
1	WT	200 nM	60
1	WT	200 nM	50
1	WT	200 nM	80
1	WT	200 nM	70
1	WT	200 nM	50
1	WT	200 nM	70
1	WT	200 nM	45
1	WT	200 nM	40
1	WT	200 nM	25
1	WT	200 nM	40
1	WT	200 nM	70
1	WT	200 nM	75
1	WT	200 nM	45
1	WT	200 nM	30
1	WT	200 nM	45
1	WT	200 nM	40
1	WT	200 nM	45
1	WT	200 nM	85
1	WT	200 nM	50
1	WT	200 nM	120
1	WT	200 nM	30
1	WT	200 nM	45
1	WT	200 nM	60
1	WT	200 nM	125
1	WT	200 nM	110
1	WT	200 nM	60
1	WT	200 nM	45
1	WT	200 nM	35
1	WT	200 nM	90
2	WT	200 nM	40
2	WT	200 nM	100
2	WT	200 nM	85
2	WT	200 nM	40
2	WT	200 nM	35
2	WT	200 nM	45
2	WT	200 nM	100
2	WT	200 nM	50
2	WT	200 nM	50
2	WT	200 nM	60
2	WT	200 nM	70
2	WT	200 nM	45
2	WT	200 nM	55
2	WT	200 nM	60
2	WT	200 nM	50
2	WT	200 nM	70
2	WT	200 nM	70
2	WT	200 nM	35
2	WT	200 nM	35
2	WT	200 nM	80
2	WT	200 nM	50
2	WT	200 nM	25
2	WT	200 nM	25
2	WT	200 nM	65
2	WT	200 nM	50
2	WT	200 nM	55
2	WT	200 nM	105
2	WT	200 nM	30
2	WT	200 nM	45
2	WT	200 nM	75
2	WT	200 nM	30
2	WT	200 nM	45
2	WT	200 nM	55
2	WT	200 nM	35
2	WT	200 nM	25
2	WT	200 nM	120
2	WT	200 nM	50
2	WT	200 nM	40
2	WT	200 nM	25
2	WT	200 nM	65
2	WT	200 nM	125
2	WT	200 nM	65
2	WT	200 nM	25
2	WT	200 nM	30
2	WT	200 nM	20
2	WT	200 nM	60
2	WT	200 nM	40
2	WT	200 nM	50
2	WT	200 nM	35
2	WT	200 nM	45
2	WT	200 nM	70
2	WT	200 nM	45
2	WT	200 nM	40
2	WT	200 nM	120
2	WT	200 nM	25
3	WT	200 nM	25
3	WT	200 nM	40
3	WT	200 nM	60
3	WT	200 nM	30
3	WT	200 nM	25
3	WT	200 nM	60
3	WT	200 nM	50
3	WT	200 nM	100
3	WT	200 nM	30
3	WT	200 nM	100
3	WT	200 nM	35
3	WT	200 nM	50
3	WT	200 nM	35
3	WT	200 nM	25
3	WT	200 nM	45
3	WT	200 nM	35
3	WT	200 nM	25
3	WT	200 nM	30
3	WT	200 nM	20
3	WT	200 nM	25
3	WT	200 nM	35
3	WT	200 nM	30
3	WT	200 nM	35
3	WT	200 nM	25
3	WT	200 nM	50
3	WT	200 nM	65
3	WT	200 nM	60
3	WT	200 nM	25
3	WT	200 nM	45
3	WT	200 nM	30
3	WT	200 nM	20
3	WT	200 nM	20
3	WT	200 nM	70
3	WT	200 nM	65
3	WT	200 nM	35
3	WT	200 nM	25
3	WT	200 nM	50
3	WT	200 nM	35
3	WT	200 nM	35
3	WT	200 nM	25
3	WT	200 nM	40
3	WT	200 nM	35
3	WT	200 nM	25
3	WT	200 nM	30
3	WT	200 nM	35
3	WT	200 nM	55
3	WT	200 nM	80
3	WT	200 nM	40
3	WT	200 nM	30
3	WT	200 nM	35
3	WT	200 nM	55
3	WT	200 nM	25
3	WT	200 nM	40
3	WT	200 nM	60
3	WT	200 nM	60
3	WT	200 nM	55
3	WT	200 nM	35
3	WT	200 nM	20
3	WT	200 nM	30
3	WT	200 nM	25
3	WT	200 nM	55
3	WT	200 nM	35
3	WT	200 nM	25
3	WT	200 nM	50
3	WT	200 nM	35
3	WT	200 nM	70
3	WT	200 nM	60
3	WT	200 nM	35
3	WT	200 nM	20
3	WT	200 nM	50
3	WT	200 nM	30
3	WT	200 nM	30
3	WT	200 nM	30
3	WT	200 nM	60
3	WT	200 nM	35
3	WT	200 nM	40
3	WT	200 nM	115
3	WT	200 nM	40
3	WT	200 nM	60
3	WT	200 nM	40
3	WT	200 nM	40
3	WT	200 nM	35
3	WT	200 nM	35
3	WT	200 nM	30
3	WT	200 nM	30
3	WT	200 nM	65
3	WT	200 nM	145
3	WT	200 nM	35
3	WT	200 nM	40
3	WT	200 nM	40
3	WT	200 nM	60
3	WT	200 nM	145
3	WT	200 nM	30
3	WT	200 nM	35
3	WT	200 nM	65
3	WT	200 nM	35
3	WT	200 nM	145
3	WT	200 nM	45
3	WT	200 nM	60
3	WT	200 nM	85
1	WT	500 nM	45
1	WT	500 nM	65
1	WT	500 nM	140
1	WT	500 nM	45
1	WT	500 nM	55
1	WT	500 nM	55
1	WT	500 nM	60
1	WT	500 nM	75
1	WT	500 nM	60
1	WT	500 nM	95
1	WT	500 nM	55
1	WT	500 nM	65
1	WT	500 nM	80
1	WT	500 nM	50
1	WT	500 nM	70
1	WT	500 nM	55
1	WT	500 nM	80
1	WT	500 nM	60
1	WT	500 nM	65
1	WT	500 nM	115
1	WT	500 nM	60
1	WT	500 nM	70
1	WT	500 nM	50
1	WT	500 nM	70
1	WT	500 nM	50
1	WT	500 nM	70
1	WT	500 nM	85
1	WT	500 nM	90
1	WT	500 nM	70
1	WT	500 nM	55
2	WT	500 nM	55
2	WT	500 nM	60
2	WT	500 nM	60
2	WT	500 nM	70
2	WT	500 nM	95
2	WT	500 nM	60
2	WT	500 nM	55
2	WT	500 nM	80
2	WT	500 nM	60
2	WT	500 nM	55
2	WT	500 nM	80
2	WT	500 nM	35
2	WT	500 nM	60
2	WT	500 nM	60
2	WT	500 nM	55
2	WT	500 nM	45
2	WT	500 nM	55
2	WT	500 nM	60
2	WT	500 nM	85
2	WT	500 nM	60
2	WT	500 nM	90
2	WT	500 nM	55
2	WT	500 nM	80
2	WT	500 nM	70
2	WT	500 nM	40
2	WT	500 nM	45
2	WT	500 nM	55
2	WT	500 nM	70
2	WT	500 nM	95
2	WT	500 nM	75
2	WT	500 nM	70
2	WT	500 nM	60
2	WT	500 nM	65
2	WT	500 nM	65
3	WT	500 nM	55
3	WT	500 nM	60
3	WT	500 nM	55
3	WT	500 nM	60
3	WT	500 nM	60
3	WT	500 nM	85
3	WT	500 nM	70
3	WT	500 nM	70
3	WT	500 nM	105
3	WT	500 nM	90
3	WT	500 nM	60
3	WT	500 nM	140
3	WT	500 nM	45
3	WT	500 nM	50
3	WT	500 nM	55
3	WT	500 nM	50
3	WT	500 nM	70
3	WT	500 nM	40
3	WT	500 nM	55
3	WT	500 nM	35
3	WT	500 nM	50
3	WT	500 nM	95
3	WT	500 nM	50
3	WT	500 nM	70
3	WT	500 nM	75
3	WT	500 nM	55
3	WT	500 nM	70
3	WT	500 nM	80
3	WT	500 nM	60
3	WT	500 nM	100
3	WT	500 nM	85
3	WT	500 nM	50
3	WT	500 nM	80
3	WT	500 nM	75
3	WT	500 nM	80
3	WT	500 nM	75
3	WT	500 nM	125
3	WT	500 nM	55
3	WT	500 nM	50
3	WT	500 nM	55
3	WT	500 nM	90
3	WT	500 nM	70
3	WT	500 nM	60
3	WT	500 nM	65
3	WT	500 nM	80
3	WT	500 nM	50
3	WT	500 nM	35
3	WT	500 nM	65
3	WT	500 nM	150
3	WT	500 nM	40
3	WT	500 nM	55
3	WT	500 nM	155
3	WT	500 nM	90
3	WT	500 nM	85
3	WT	500 nM	25
3	WT	500 nM	65
3	WT	500 nM	40
3	WT	500 nM	25
3	WT	500 nM	55
3	WT	500 nM	25
3	WT	500 nM	80
3	WT	500 nM	60
3	WT	500 nM	65
3	WT	500 nM	75
3	WT	500 nM	80
3	WT	500 nM	75
3	WT	500 nM	60
3	WT	500 nM	20
3	WT	500 nM	55
3	WT	500 nM	150
3	WT	500 nM	60
3	WT	500 nM	75
3	WT	500 nM	70
3	WT	500 nM	60
3	WT	500 nM	60
3	WT	500 nM	60
3	WT	500 nM	50
3	WT	500 nM	65
3	WT	500 nM	110
3	WT	500 nM	60
3	WT	500 nM	120
3	WT	500 nM	50
3	WT	500 nM	55
3	WT	500 nM	40
3	WT	500 nM	45
3	WT	500 nM	75
3	WT	500 nM	65
3	WT	500 nM	50
3	WT	500 nM	50
3	WT	500 nM	55
3	WT	500 nM	65
3	WT	500 nM	85
3	WT	500 nM	100
3	WT	500 nM	60
3	WT	500 nM	50
3	WT	500 nM	95
3	WT	500 nM	65
3	WT	500 nM	60
3	WT	500 nM	75
3	WT	500 nM	60
1	dTRIM37	DMSO	20
1	dTRIM37	DMSO	20
1	dTRIM37	DMSO	25
1	dTRIM37	DMSO	25
1	dTRIM37	DMSO	25
1	dTRIM37	DMSO	20
1	dTRIM37	DMSO	20
1	dTRIM37	DMSO	20
1	dTRIM37	DMSO	25
1	dTRIM37	DMSO	30
1	dTRIM37	DMSO	25
1	dTRIM37	DMSO	25
1	dTRIM37	DMSO	25
1	dTRIM37	DMSO	25
1	dTRIM37	DMSO	20
1	dTRIM37	DMSO	25
1	dTRIM37	DMSO	30
1	dTRIM37	DMSO	20
1	dTRIM37	DMSO	20
1	dTRIM37	DMSO	25
1	dTRIM37	DMSO	25
1	dTRIM37	DMSO	20
1	dTRIM37	DMSO	20
1	dTRIM37	DMSO	25
1	dTRIM37	DMSO	25
1	dTRIM37	DMSO	20
1	dTRIM37	DMSO	25
1	dTRIM37	DMSO	20
1	dTRIM37	DMSO	20
1	dTRIM37	DMSO	20
1	dTRIM37	DMSO	25
1	dTRIM37	DMSO	30
1	dTRIM37	DMSO	25
1	dTRIM37	DMSO	25
1	dTRIM37	DMSO	20
1	dTRIM37	DMSO	20
1	dTRIM37	DMSO	25
1	dTRIM37	DMSO	20
1	dTRIM37	DMSO	25
1	dTRIM37	DMSO	25
1	dTRIM37	DMSO	20
1	dTRIM37	DMSO	25
1	dTRIM37	DMSO	20
1	dTRIM37	DMSO	20
1	dTRIM37	DMSO	20
1	dTRIM37	DMSO	25
1	dTRIM37	DMSO	20
1	dTRIM37	DMSO	30
1	dTRIM37	DMSO	20
1	dTRIM37	DMSO	20
1	dTRIM37	DMSO	20
1	dTRIM37	DMSO	25
1	dTRIM37	DMSO	25
1	dTRIM37	DMSO	25
1	dTRIM37	DMSO	25
2	dTRIM37	DMSO	25
2	dTRIM37	DMSO	25
2	dTRIM37	DMSO	20
2	dTRIM37	DMSO	25
2	dTRIM37	DMSO	25
2	dTRIM37	DMSO	25
2	dTRIM37	DMSO	35
2	dTRIM37	DMSO	20
2	dTRIM37	DMSO	25
2	dTRIM37	DMSO	25
2	dTRIM37	DMSO	30
2	dTRIM37	DMSO	25
2	dTRIM37	DMSO	35
2	dTRIM37	DMSO	25
2	dTRIM37	DMSO	25
2	dTRIM37	DMSO	30
2	dTRIM37	DMSO	30
2	dTRIM37	DMSO	25
2	dTRIM37	DMSO	25
2	dTRIM37	DMSO	20
2	dTRIM37	DMSO	25
2	dTRIM37	DMSO	40
2	dTRIM37	DMSO	25
2	dTRIM37	DMSO	25
2	dTRIM37	DMSO	20
2	dTRIM37	DMSO	25
2	dTRIM37	DMSO	20
2	dTRIM37	DMSO	25
2	dTRIM37	DMSO	25
2	dTRIM37	DMSO	20
2	dTRIM37	DMSO	25
2	dTRIM37	DMSO	30
2	dTRIM37	DMSO	25
2	dTRIM37	DMSO	25
2	dTRIM37	DMSO	30
2	dTRIM37	DMSO	35
2	dTRIM37	DMSO	35
2	dTRIM37	DMSO	25
2	dTRIM37	DMSO	25
2	dTRIM37	DMSO	25
2	dTRIM37	DMSO	25
2	dTRIM37	DMSO	30
2	dTRIM37	DMSO	25
2	dTRIM37	DMSO	25
2	dTRIM37	DMSO	25
2	dTRIM37	DMSO	25
2	dTRIM37	DMSO	35
2	dTRIM37	DMSO	25
2	dTRIM37	DMSO	25
2	dTRIM37	DMSO	20
2	dTRIM37	DMSO	20
2	dTRIM37	DMSO	20
2	dTRIM37	DMSO	25
2	dTRIM37	DMSO	25
2	dTRIM37	DMSO	20
3	dTRIM37	DMSO	25
3	dTRIM37	DMSO	25
3	dTRIM37	DMSO	20
3	dTRIM37	DMSO	25
3	dTRIM37	DMSO	35
3	dTRIM37	DMSO	25
3	dTRIM37	DMSO	25
3	dTRIM37	DMSO	25
3	dTRIM37	DMSO	35
3	dTRIM37	DMSO	30
3	dTRIM37	DMSO	35
3	dTRIM37	DMSO	25
3	dTRIM37	DMSO	25
3	dTRIM37	DMSO	25
3	dTRIM37	DMSO	25
3	dTRIM37	DMSO	25
3	dTRIM37	DMSO	30
3	dTRIM37	DMSO	30
3	dTRIM37	DMSO	30
3	dTRIM37	DMSO	30
3	dTRIM37	DMSO	30
3	dTRIM37	DMSO	30
3	dTRIM37	DMSO	35
3	dTRIM37	DMSO	35
3	dTRIM37	DMSO	30
3	dTRIM37	DMSO	30
3	dTRIM37	DMSO	30
3	dTRIM37	DMSO	30
3	dTRIM37	DMSO	20
3	dTRIM37	DMSO	30
3	dTRIM37	DMSO	35
3	dTRIM37	DMSO	45
3	dTRIM37	DMSO	30
3	dTRIM37	DMSO	30
3	dTRIM37	DMSO	25
3	dTRIM37	DMSO	25
3	dTRIM37	DMSO	25
3	dTRIM37	DMSO	25
3	dTRIM37	DMSO	25
3	dTRIM37	DMSO	25
3	dTRIM37	DMSO	25
3	dTRIM37	DMSO	25
3	dTRIM37	DMSO	30
3	dTRIM37	DMSO	25
3	dTRIM37	DMSO	30
3	dTRIM37	DMSO	30
3	dTRIM37	DMSO	35
3	dTRIM37	DMSO	25
3	dTRIM37	DMSO	25
3	dTRIM37	DMSO	30
1	dTRIM37	50 nM	25
1	dTRIM37	50 nM	25
1	dTRIM37	50 nM	20
1	dTRIM37	50 nM	20
1	dTRIM37	50 nM	20
1	dTRIM37	50 nM	20
1	dTRIM37	50 nM	25
1	dTRIM37	50 nM	25
1	dTRIM37	50 nM	25
1	dTRIM37	50 nM	20
1	dTRIM37	50 nM	25
1	dTRIM37	50 nM	30
1	dTRIM37	50 nM	25
1	dTRIM37	50 nM	30
1	dTRIM37	50 nM	20
1	dTRIM37	50 nM	20
1	dTRIM37	50 nM	25
1	dTRIM37	50 nM	25
1	dTRIM37	50 nM	20
1	dTRIM37	50 nM	25
1	dTRIM37	50 nM	30
1	dTRIM37	50 nM	30
1	dTRIM37	50 nM	20
1	dTRIM37	50 nM	25
1	dTRIM37	50 nM	20
1	dTRIM37	50 nM	25
1	dTRIM37	50 nM	25
1	dTRIM37	50 nM	20
1	dTRIM37	50 nM	25
1	dTRIM37	50 nM	25
1	dTRIM37	50 nM	25
1	dTRIM37	50 nM	35
1	dTRIM37	50 nM	20
1	dTRIM37	50 nM	20
1	dTRIM37	50 nM	20
1	dTRIM37	50 nM	25
1	dTRIM37	50 nM	35
1	dTRIM37	50 nM	20
1	dTRIM37	50 nM	20
1	dTRIM37	50 nM	20
1	dTRIM37	50 nM	25
1	dTRIM37	50 nM	20
1	dTRIM37	50 nM	20
1	dTRIM37	50 nM	25
1	dTRIM37	50 nM	20
1	dTRIM37	50 nM	50
1	dTRIM37	50 nM	25
1	dTRIM37	50 nM	20
1	dTRIM37	50 nM	20
1	dTRIM37	50 nM	25
1	dTRIM37	50 nM	25
1	dTRIM37	50 nM	20
1	dTRIM37	50 nM	25
1	dTRIM37	50 nM	25
1	dTRIM37	50 nM	25
2	dTRIM37	50 nM	20
2	dTRIM37	50 nM	25
2	dTRIM37	50 nM	25
2	dTRIM37	50 nM	20
2	dTRIM37	50 nM	25
2	dTRIM37	50 nM	30
2	dTRIM37	50 nM	25
2	dTRIM37	50 nM	25
2	dTRIM37	50 nM	25
2	dTRIM37	50 nM	30
2	dTRIM37	50 nM	35
2	dTRIM37	50 nM	25
2	dTRIM37	50 nM	25
2	dTRIM37	50 nM	25
2	dTRIM37	50 nM	25
2	dTRIM37	50 nM	40
2	dTRIM37	50 nM	25
2	dTRIM37	50 nM	30
2	dTRIM37	50 nM	20
2	dTRIM37	50 nM	30
2	dTRIM37	50 nM	25
2	dTRIM37	50 nM	35
2	dTRIM37	50 nM	25
2	dTRIM37	50 nM	25
2	dTRIM37	50 nM	20
2	dTRIM37	50 nM	45
2	dTRIM37	50 nM	60
2	dTRIM37	50 nM	55
2	dTRIM37	50 nM	20
2	dTRIM37	50 nM	20
2	dTRIM37	50 nM	25
2	dTRIM37	50 nM	20
2	dTRIM37	50 nM	25
2	dTRIM37	50 nM	25
2	dTRIM37	50 nM	25
2	dTRIM37	50 nM	20
2	dTRIM37	50 nM	30
2	dTRIM37	50 nM	20
2	dTRIM37	50 nM	45
2	dTRIM37	50 nM	20
2	dTRIM37	50 nM	30
2	dTRIM37	50 nM	25
2	dTRIM37	50 nM	20
2	dTRIM37	50 nM	35
2	dTRIM37	50 nM	20
2	dTRIM37	50 nM	20
2	dTRIM37	50 nM	25
2	dTRIM37	50 nM	60
2	dTRIM37	50 nM	25
2	dTRIM37	50 nM	20
2	dTRIM37	50 nM	20
2	dTRIM37	50 nM	25
2	dTRIM37	50 nM	25
2	dTRIM37	50 nM	25
2	dTRIM37	50 nM	25
3	dTRIM37	50 nM	25
3	dTRIM37	50 nM	20
3	dTRIM37	50 nM	30
3	dTRIM37	50 nM	20
3	dTRIM37	50 nM	25
3	dTRIM37	50 nM	20
3	dTRIM37	50 nM	25
3	dTRIM37	50 nM	30
3	dTRIM37	50 nM	20
3	dTRIM37	50 nM	25
3	dTRIM37	50 nM	20
3	dTRIM37	50 nM	25
3	dTRIM37	50 nM	25
3	dTRIM37	50 nM	25
3	dTRIM37	50 nM	20
3	dTRIM37	50 nM	25
3	dTRIM37	50 nM	25
3	dTRIM37	50 nM	25
3	dTRIM37	50 nM	25
3	dTRIM37	50 nM	25
3	dTRIM37	50 nM	30
3	dTRIM37	50 nM	25
3	dTRIM37	50 nM	25
3	dTRIM37	50 nM	30
3	dTRIM37	50 nM	25
3	dTRIM37	50 nM	25
3	dTRIM37	50 nM	20
3	dTRIM37	50 nM	25
3	dTRIM37	50 nM	30
3	dTRIM37	50 nM	40
3	dTRIM37	50 nM	25
3	dTRIM37	50 nM	25
3	dTRIM37	50 nM	25
3	dTRIM37	50 nM	25
3	dTRIM37	50 nM	25
3	dTRIM37	50 nM	25
3	dTRIM37	50 nM	30
3	dTRIM37	50 nM	25
3	dTRIM37	50 nM	20
3	dTRIM37	50 nM	35
3	dTRIM37	50 nM	25
3	dTRIM37	50 nM	25
3	dTRIM37	50 nM	30
3	dTRIM37	50 nM	25
3	dTRIM37	50 nM	25
3	dTRIM37	50 nM	25
3	dTRIM37	50 nM	25
3	dTRIM37	50 nM	25
3	dTRIM37	50 nM	35
3	dTRIM37	50 nM	35
1	dTRIM37	125 nM	25
1	dTRIM37	125 nM	25
1	dTRIM37	125 nM	25
1	dTRIM37	125 nM	20
1	dTRIM37	125 nM	30
1	dTRIM37	125 nM	20
1	dTRIM37	125 nM	25
1	dTRIM37	125 nM	20
1	dTRIM37	125 nM	20
1	dTRIM37	125 nM	20
1	dTRIM37	125 nM	20
1	dTRIM37	125 nM	45
1	dTRIM37	125 nM	20
1	dTRIM37	125 nM	20
1	dTRIM37	125 nM	20
1	dTRIM37	125 nM	20
1	dTRIM37	125 nM	30
1	dTRIM37	125 nM	25
1	dTRIM37	125 nM	25
1	dTRIM37	125 nM	25
1	dTRIM37	125 nM	25
1	dTRIM37	125 nM	30
1	dTRIM37	125 nM	25
1	dTRIM37	125 nM	20
1	dTRIM37	125 nM	35
1	dTRIM37	125 nM	25
1	dTRIM37	125 nM	20
1	dTRIM37	125 nM	20
1	dTRIM37	125 nM	25
1	dTRIM37	125 nM	30
1	dTRIM37	125 nM	25
1	dTRIM37	125 nM	35
1	dTRIM37	125 nM	25
1	dTRIM37	125 nM	35
1	dTRIM37	125 nM	20
1	dTRIM37	125 nM	20
1	dTRIM37	125 nM	35
1	dTRIM37	125 nM	35
1	dTRIM37	125 nM	20
1	dTRIM37	125 nM	20
1	dTRIM37	125 nM	40
1	dTRIM37	125 nM	35
1	dTRIM37	125 nM	25
1	dTRIM37	125 nM	25
1	dTRIM37	125 nM	20
1	dTRIM37	125 nM	25
1	dTRIM37	125 nM	20
1	dTRIM37	125 nM	25
1	dTRIM37	125 nM	20
1	dTRIM37	125 nM	20
1	dTRIM37	125 nM	30
1	dTRIM37	125 nM	20
1	dTRIM37	125 nM	30
1	dTRIM37	125 nM	20
1	dTRIM37	125 nM	25
2	dTRIM37	125 nM	40
2	dTRIM37	125 nM	55
2	dTRIM37	125 nM	25
2	dTRIM37	125 nM	25
2	dTRIM37	125 nM	30
2	dTRIM37	125 nM	35
2	dTRIM37	125 nM	25
2	dTRIM37	125 nM	25
2	dTRIM37	125 nM	35
2	dTRIM37	125 nM	25
2	dTRIM37	125 nM	25
2	dTRIM37	125 nM	45
2	dTRIM37	125 nM	25
2	dTRIM37	125 nM	50
2	dTRIM37	125 nM	40
2	dTRIM37	125 nM	25
2	dTRIM37	125 nM	25
2	dTRIM37	125 nM	40
2	dTRIM37	125 nM	25
2	dTRIM37	125 nM	25
2	dTRIM37	125 nM	25
2	dTRIM37	125 nM	25
2	dTRIM37	125 nM	20
2	dTRIM37	125 nM	20
2	dTRIM37	125 nM	25
2	dTRIM37	125 nM	40
2	dTRIM37	125 nM	25
2	dTRIM37	125 nM	20
2	dTRIM37	125 nM	25
2	dTRIM37	125 nM	25
2	dTRIM37	125 nM	25
2	dTRIM37	125 nM	30
2	dTRIM37	125 nM	25
2	dTRIM37	125 nM	25
2	dTRIM37	125 nM	25
2	dTRIM37	125 nM	25
2	dTRIM37	125 nM	50
2	dTRIM37	125 nM	30
2	dTRIM37	125 nM	30
2	dTRIM37	125 nM	20
2	dTRIM37	125 nM	40
2	dTRIM37	125 nM	30
2	dTRIM37	125 nM	30
2	dTRIM37	125 nM	20
2	dTRIM37	125 nM	25
2	dTRIM37	125 nM	40
2	dTRIM37	125 nM	25
2	dTRIM37	125 nM	50
2	dTRIM37	125 nM	25
2	dTRIM37	125 nM	20
2	dTRIM37	125 nM	25
2	dTRIM37	125 nM	25
2	dTRIM37	125 nM	25
2	dTRIM37	125 nM	25
2	dTRIM37	125 nM	30
3	dTRIM37	125 nM	30
3	dTRIM37	125 nM	35
3	dTRIM37	125 nM	25
3	dTRIM37	125 nM	25
3	dTRIM37	125 nM	25
3	dTRIM37	125 nM	25
3	dTRIM37	125 nM	20
3	dTRIM37	125 nM	25
3	dTRIM37	125 nM	40
3	dTRIM37	125 nM	30
3	dTRIM37	125 nM	20
3	dTRIM37	125 nM	30
3	dTRIM37	125 nM	50
3	dTRIM37	125 nM	30
3	dTRIM37	125 nM	25
3	dTRIM37	125 nM	30
3	dTRIM37	125 nM	40
3	dTRIM37	125 nM	20
3	dTRIM37	125 nM	20
3	dTRIM37	125 nM	30
3	dTRIM37	125 nM	30
3	dTRIM37	125 nM	25
3	dTRIM37	125 nM	25
3	dTRIM37	125 nM	20
3	dTRIM37	125 nM	35
3	dTRIM37	125 nM	30
3	dTRIM37	125 nM	25
3	dTRIM37	125 nM	30
3	dTRIM37	125 nM	30
3	dTRIM37	125 nM	30
3	dTRIM37	125 nM	30
3	dTRIM37	125 nM	25
3	dTRIM37	125 nM	25
3	dTRIM37	125 nM	25
3	dTRIM37	125 nM	25
3	dTRIM37	125 nM	20
3	dTRIM37	125 nM	30
3	dTRIM37	125 nM	30
3	dTRIM37	125 nM	25
3	dTRIM37	125 nM	30
3	dTRIM37	125 nM	25
3	dTRIM37	125 nM	25
3	dTRIM37	125 nM	30
3	dTRIM37	125 nM	25
3	dTRIM37	125 nM	25
3	dTRIM37	125 nM	25
3	dTRIM37	125 nM	35
3	dTRIM37	125 nM	35
3	dTRIM37	125 nM	25
3	dTRIM37	125 nM	35
1	dTRIM37	150 nM	25
1	dTRIM37	150 nM	50
1	dTRIM37	150 nM	55
1	dTRIM37	150 nM	30
1	dTRIM37	150 nM	20
1	dTRIM37	150 nM	20
1	dTRIM37	150 nM	25
1	dTRIM37	150 nM	30
1	dTRIM37	150 nM	40
1	dTRIM37	150 nM	25
1	dTRIM37	150 nM	35
1	dTRIM37	150 nM	20
1	dTRIM37	150 nM	25
1	dTRIM37	150 nM	55
1	dTRIM37	150 nM	55
1	dTRIM37	150 nM	20
1	dTRIM37	150 nM	50
1	dTRIM37	150 nM	30
1	dTRIM37	150 nM	45
1	dTRIM37	150 nM	25
1	dTRIM37	150 nM	20
1	dTRIM37	150 nM	30
1	dTRIM37	150 nM	35
1	dTRIM37	150 nM	30
1	dTRIM37	150 nM	20
1	dTRIM37	150 nM	30
1	dTRIM37	150 nM	25
1	dTRIM37	150 nM	35
1	dTRIM37	150 nM	30
1	dTRIM37	150 nM	30
1	dTRIM37	150 nM	30
1	dTRIM37	150 nM	30
1	dTRIM37	150 nM	30
1	dTRIM37	150 nM	40
1	dTRIM37	150 nM	35
1	dTRIM37	150 nM	25
1	dTRIM37	150 nM	40
1	dTRIM37	150 nM	40
1	dTRIM37	150 nM	35
1	dTRIM37	150 nM	20
1	dTRIM37	150 nM	40
1	dTRIM37	150 nM	25
1	dTRIM37	150 nM	20
1	dTRIM37	150 nM	45
1	dTRIM37	150 nM	25
1	dTRIM37	150 nM	55
1	dTRIM37	150 nM	30
1	dTRIM37	150 nM	35
1	dTRIM37	150 nM	25
1	dTRIM37	150 nM	20
1	dTRIM37	150 nM	25
1	dTRIM37	150 nM	25
1	dTRIM37	150 nM	25
1	dTRIM37	150 nM	25
1	dTRIM37	150 nM	70
2	dTRIM37	150 nM	40
2	dTRIM37	150 nM	35
2	dTRIM37	150 nM	50
2	dTRIM37	150 nM	25
2	dTRIM37	150 nM	20
2	dTRIM37	150 nM	70
2	dTRIM37	150 nM	50
2	dTRIM37	150 nM	20
2	dTRIM37	150 nM	20
2	dTRIM37	150 nM	50
2	dTRIM37	150 nM	40
2	dTRIM37	150 nM	35
2	dTRIM37	150 nM	35
2	dTRIM37	150 nM	25
2	dTRIM37	150 nM	35
2	dTRIM37	150 nM	25
2	dTRIM37	150 nM	40
2	dTRIM37	150 nM	20
2	dTRIM37	150 nM	40
2	dTRIM37	150 nM	65
2	dTRIM37	150 nM	25
2	dTRIM37	150 nM	35
2	dTRIM37	150 nM	35
2	dTRIM37	150 nM	35
2	dTRIM37	150 nM	35
2	dTRIM37	150 nM	45
2	dTRIM37	150 nM	35
2	dTRIM37	150 nM	30
2	dTRIM37	150 nM	30
2	dTRIM37	150 nM	35
2	dTRIM37	150 nM	60
2	dTRIM37	150 nM	35
2	dTRIM37	150 nM	30
2	dTRIM37	150 nM	30
2	dTRIM37	150 nM	60
2	dTRIM37	150 nM	25
2	dTRIM37	150 nM	25
2	dTRIM37	150 nM	25
2	dTRIM37	150 nM	35
2	dTRIM37	150 nM	30
[truncated: 545 more rows]

## Sheet: Figure5B
Replicate	TRIM37 rescue construct	Induced	Centrinone	Time			Summary
1	WT	N	Y	60
1	WT	N	Y	30			Replicate	TRIM37 rescue construct	Induced	Centrinone	Total cells
1	WT	N	Y	25			1	WT	N	N	50
1	WT	N	Y	45			1	WT	N	Y	50
1	WT	N	Y	60			1	WT	Y	N	50
1	WT	N	Y	50			1	WT	Y	Y	46
1	WT	N	Y	50			1	C18R	N	N	50
1	WT	N	Y	30			1	C18R	N	Y	50
1	WT	N	Y	45			1	C18R	Y	N	50
1	WT	N	Y	50			1	C18R	Y	Y	50
1	WT	N	Y	40			2	WT	N	N	50
1	WT	N	Y	30			2	WT	N	Y	50
1	WT	N	Y	60			2	WT	Y	N	50
1	WT	N	Y	30			2	WT	Y	Y	50
1	WT	N	Y	45			2	C18R	N	N	50
1	WT	N	Y	40			2	C18R	N	Y	50
1	WT	N	Y	35			2	C18R	Y	N	50
1	WT	N	Y	50			2	C18R	Y	Y	50
1	WT	N	Y	30			3	WT	N	N	50
1	WT	N	Y	40			3	WT	N	Y	50
1	WT	N	Y	35			3	WT	Y	N	50
1	WT	N	Y	35			3	WT	Y	Y	50
1	WT	N	Y	25			3	C18R	N	N	50
1	WT	N	Y	45			3	C18R	N	Y	50
1	WT	N	Y	40			3	C18R	Y	N	50
1	WT	N	Y	50			3	C18R	Y	Y	50
1	WT	N	Y	35
1	WT	N	Y	35
1	WT	N	Y	60
1	WT	N	Y	30
1	WT	N	Y	55
1	WT	N	Y	25
1	WT	N	Y	30
1	WT	N	Y	50
1	WT	N	Y	35
1	WT	N	Y	30
1	WT	N	Y	35
1	WT	N	Y	85
1	WT	N	Y	50
1	WT	N	Y	45
1	WT	N	Y	35
1	WT	N	Y	35
1	WT	N	Y	40
1	WT	N	Y	35
1	WT	N	Y	85
1	WT	N	Y	50
1	WT	N	Y	40
1	WT	N	Y	60
1	WT	N	Y	35
1	WT	N	Y	30
1	WT	Y	Y	50
1	WT	Y	Y	145
1	WT	Y	Y	45
1	WT	Y	Y	45
1	WT	Y	Y	40
1	WT	Y	Y	65
1	WT	Y	Y	40
1	WT	Y	Y	90
1	WT	Y	Y	50
1	WT	Y	Y	75
1	WT	Y	Y	60
1	WT	Y	Y	55
1	WT	Y	Y	75
1	WT	Y	Y	20
1	WT	Y	Y	45
1	WT	Y	Y	75
1	WT	Y	Y	30
1	WT	Y	Y	75
1	WT	Y	Y	65
1	WT	Y	Y	60
1	WT	Y	Y	95
1	WT	Y	Y	85
1	WT	Y	Y	25
1	WT	Y	Y	105
1	WT	Y	Y	90
1	WT	Y	Y	100
1	WT	Y	Y	140
1	WT	Y	Y	45
1	WT	Y	Y	40
1	WT	Y	Y	35
1	WT	Y	Y	65
1	WT	Y	Y	75
1	WT	Y	Y	55
1	WT	Y	Y	50
1	WT	Y	Y	55
1	WT	Y	Y	70
1	WT	Y	Y	30
1	WT	Y	Y	75
1	WT	Y	Y	55
1	WT	Y	Y	95
1	WT	Y	Y	40
1	WT	Y	Y	50
1	WT	Y	Y	50
1	WT	Y	Y	50
1	WT	Y	Y	55
1	WT	Y	Y	55
1	WT	N	N	15
1	WT	N	N	20
1	WT	N	N	20
1	WT	N	N	20
1	WT	N	N	20
1	WT	N	N	20
1	WT	N	N	20
1	WT	N	N	20
1	WT	N	N	20
1	WT	N	N	20
1	WT	N	N	20
1	WT	N	N	20
1	WT	N	N	20
1	WT	N	N	20
1	WT	N	N	20
1	WT	N	N	20
1	WT	N	N	20
1	WT	N	N	20
1	WT	N	N	20
1	WT	N	N	20
1	WT	N	N	20
1	WT	N	N	20
1	WT	N	N	20
1	WT	N	N	20
1	WT	N	N	20
1	WT	N	N	20
1	WT	N	N	25
1	WT	N	N	25
1	WT	N	N	25
1	WT	N	N	25
1	WT	N	N	25
1	WT	N	N	25
1	WT	N	N	25
1	WT	N	N	25
1	WT	N	N	25
1	WT	N	N	25
1	WT	N	N	25
1	WT	N	N	25
1	WT	N	N	25
1	WT	N	N	25
1	WT	N	N	25
1	WT	N	N	25
1	WT	N	N	25
1	WT	N	N	25
1	WT	N	N	25
1	WT	N	N	25
1	WT	N	N	25
1	WT	N	N	30
1	WT	N	N	35
1	WT	N	N	45
1	WT	Y	N	20
1	WT	Y	N	20
1	WT	Y	N	25
1	WT	Y	N	25
1	WT	Y	N	25
1	WT	Y	N	25
1	WT	Y	N	25
1	WT	Y	N	30
1	WT	Y	N	30
1	WT	Y	N	23
1	WT	Y	N	20
1	WT	Y	N	25
1	WT	Y	N	20
1	WT	Y	N	20
1	WT	Y	N	20
1	WT	Y	N	25
1	WT	Y	N	20
1	WT	Y	N	20
1	WT	Y	N	25
1	WT	Y	N	25
1	WT	Y	N	20
1	WT	Y	N	20
1	WT	Y	N	25
1	WT	Y	N	20
1	WT	Y	N	20
1	WT	Y	N	25
1	WT	Y	N	20
1	WT	Y	N	20
1	WT	Y	N	20
1	WT	Y	N	25
1	WT	Y	N	20
1	WT	Y	N	20
1	WT	Y	N	20
1	WT	Y	N	20
1	WT	Y	N	25
1	WT	Y	N	25
1	WT	Y	N	20
1	WT	Y	N	20
1	WT	Y	N	25
1	WT	Y	N	20
1	WT	Y	N	25
1	WT	Y	N	25
1	WT	Y	N	25
1	WT	Y	N	25
1	WT	Y	N	25
1	WT	Y	N	20
1	WT	Y	N	25
1	WT	Y	N	25
1	WT	Y	N	25
1	WT	Y	N	25
1	C18R	N	N	20
1	C18R	N	N	30
1	C18R	N	N	20
1	C18R	N	N	20
1	C18R	N	N	20
1	C18R	N	N	20
1	C18R	N	N	25
1	C18R	N	N	25
1	C18R	N	N	15
1	C18R	N	N	25
1	C18R	N	N	20
1	C18R	N	N	25
1	C18R	N	N	20
1	C18R	N	N	20
1	C18R	N	N	20
1	C18R	N	N	20
1	C18R	N	N	30
1	C18R	N	N	20
1	C18R	N	N	25
1	C18R	N	N	20
1	C18R	N	N	20
1	C18R	N	N	30
1	C18R	N	N	20
1	C18R	N	N	20
1	C18R	N	N	25
1	C18R	N	N	25
1	C18R	N	N	20
1	C18R	N	N	20
1	C18R	N	N	25
1	C18R	N	N	20
1	C18R	N	N	30
1	C18R	N	N	25
1	C18R	N	N	20
1	C18R	N	N	25
1	C18R	N	N	20
1	C18R	N	N	25
1	C18R	N	N	20
1	C18R	N	N	25
1	C18R	N	N	25
1	C18R	N	N	30
1	C18R	N	N	20
1	C18R	N	N	25
1	C18R	N	N	40
1	C18R	N	N	25
1	C18R	N	N	25
1	C18R	N	N	20
1	C18R	N	N	20
1	C18R	N	N	25
1	C18R	N	N	25
1	C18R	N	N	25
1	C18R	N	Y	20
1	C18R	N	Y	25
1	C18R	N	Y	30
1	C18R	N	Y	35
1	C18R	N	Y	30
1	C18R	N	Y	35
1	C18R	N	Y	20
1	C18R	N	Y	25
1	C18R	N	Y	50
1	C18R	N	Y	25
1	C18R	N	Y	30
1	C18R	N	Y	30
1	C18R	N	Y	30
1	C18R	N	Y	30
1	C18R	N	Y	30
1	C18R	N	Y	30
1	C18R	N	Y	50
1	C18R	N	Y	30
1	C18R	N	Y	30
1	C18R	N	Y	25
1	C18R	N	Y	40
1	C18R	N	Y	50
1	C18R	N	Y	25
1	C18R	N	Y	35
1	C18R	N	Y	35
1	C18R	N	Y	35
1	C18R	N	Y	30
1	C18R	N	Y	35
1	C18R	N	Y	30
1	C18R	N	Y	35
1	C18R	N	Y	25
1	C18R	N	Y	30
1	C18R	N	Y	25
1	C18R	N	Y	45
1	C18R	N	Y	30
1	C18R	N	Y	25
1	C18R	N	Y	35
1	C18R	N	Y	40
1	C18R	N	Y	50
1	C18R	N	Y	25
1	C18R	N	Y	25
1	C18R	N	Y	25
1	C18R	N	Y	30
1	C18R	N	Y	40
1	C18R	N	Y	40
1	C18R	N	Y	30
1	C18R	N	Y	30
1	C18R	N	Y	30
1	C18R	N	Y	30
1	C18R	N	Y	35
1	C18R	Y	N	20
1	C18R	Y	N	20
1	C18R	Y	N	20
1	C18R	Y	N	20
1	C18R	Y	N	20
1	C18R	Y	N	20
1	C18R	Y	N	20
1	C18R	Y	N	20
1	C18R	Y	N	20
1	C18R	Y	N	25
1	C18R	Y	N	25
1	C18R	Y	N	20
1	C18R	Y	N	25
1	C18R	Y	N	20
1	C18R	Y	N	20
1	C18R	Y	N	25
1	C18R	Y	N	20
1	C18R	Y	N	20
1	C18R	Y	N	25
1	C18R	Y	N	20
1	C18R	Y	N	20
1	C18R	Y	N	20
1	C18R	Y	N	20
1	C18R	Y	N	20
1	C18R	Y	N	20
1	C18R	Y	N	20
1	C18R	Y	N	20
1	C18R	Y	N	20
1	C18R	Y	N	20
1	C18R	Y	N	25
1	C18R	Y	N	25
1	C18R	Y	N	20
1	C18R	Y	N	20
1	C18R	Y	N	20
1	C18R	Y	N	25
1	C18R	Y	N	25
1	C18R	Y	N	30
1	C18R	Y	N	20
1	C18R	Y	N	20
1	C18R	Y	N	20
1	C18R	Y	N	20
1	C18R	Y	N	25
1	C18R	Y	N	20
1	C18R	Y	N	40
1	C18R	Y	N	25
1	C18R	Y	N	20
1	C18R	Y	N	20
1	C18R	Y	N	25
1	C18R	Y	N	25
1	C18R	Y	N	20
1	C18R	Y	Y	25
1	C18R	Y	Y	45
1	C18R	Y	Y	35
1	C18R	Y	Y	40
1	C18R	Y	Y	35
1	C18R	Y	Y	35
1	C18R	Y	Y	25
1	C18R	Y	Y	35
1	C18R	Y	Y	30
1	C18R	Y	Y	35
1	C18R	Y	Y	25
1	C18R	Y	Y	20
1	C18R	Y	Y	45
1	C18R	Y	Y	30
1	C18R	Y	Y	30
1	C18R	Y	Y	70
1	C18R	Y	Y	40
1	C18R	Y	Y	30
1	C18R	Y	Y	25
1	C18R	Y	Y	25
1	C18R	Y	Y	25
1	C18R	Y	Y	35
1	C18R	Y	Y	30
1	C18R	Y	Y	35
1	C18R	Y	Y	25
1	C18R	Y	Y	50
1	C18R	Y	Y	55
1	C18R	Y	Y	25
1	C18R	Y	Y	65
1	C18R	Y	Y	40
1	C18R	Y	Y	30
1	C18R	Y	Y	50
1	C18R	Y	Y	30
1	C18R	Y	Y	25
1	C18R	Y	Y	35
1	C18R	Y	Y	35
1	C18R	Y	Y	35
1	C18R	Y	Y	30
1	C18R	Y	Y	35
1	C18R	Y	Y	35
1	C18R	Y	Y	40
1	C18R	Y	Y	35
1	C18R	Y	Y	30
1	C18R	Y	Y	60
1	C18R	Y	Y	45
1	C18R	Y	Y	40
1	C18R	Y	Y	45
1	C18R	Y	Y	30
1	C18R	Y	Y	45
1	C18R	Y	Y	30
2	WT	N	N	25
2	WT	N	N	25
2	WT	N	N	25
2	WT	N	N	25
2	WT	N	N	25
2	WT	N	N	25
2	WT	N	N	25
2	WT	N	N	25
2	WT	N	N	25
2	WT	N	N	25
2	WT	N	N	25
2	WT	N	N	25
2	WT	N	N	25
2	WT	N	N	20
2	WT	N	N	20
2	WT	N	N	20
2	WT	N	N	20
2	WT	N	N	20
2	WT	N	N	20
2	WT	N	N	20
2	WT	N	N	20
2	WT	N	N	20
2	WT	N	N	20
2	WT	N	N	20
2	WT	N	N	20
2	WT	N	N	20
2	WT	N	N	15
2	WT	N	N	20
2	WT	N	N	20
2	WT	N	N	20
2	WT	N	N	20
2	WT	N	N	20
2	WT	N	N	20
2	WT	N	N	20
2	WT	N	N	20
2	WT	N	N	20
2	WT	N	N	20
2	WT	N	N	20
2	WT	N	N	20
2	WT	N	N	20
2	WT	N	N	25
2	WT	N	N	25
2	WT	N	N	25
2	WT	N	N	25
2	WT	N	N	25
2	WT	N	N	30
2	WT	N	N	30
2	WT	N	N	20
2	WT	N	N	20
2	WT	N	N	20
2	WT	N	Y	45
2	WT	N	Y	40
2	WT	N	Y	50
2	WT	N	Y	45
2	WT	N	Y	45
2	WT	N	Y	50
2	WT	N	Y	100
2	WT	N	Y	75
2	WT	N	Y	45
2	WT	N	Y	65
2	WT	N	Y	35
2	WT	N	Y	30
2	WT	N	Y	50
2	WT	N	Y	20
2	WT	N	Y	50
2	WT	N	Y	50
2	WT	N	Y	45
2	WT	N	Y	50
2	WT	N	Y	50
2	WT	N	Y	30
2	WT	N	Y	65
2	WT	N	Y	45
2	WT	N	Y	90
2	WT	N	Y	40
2	WT	N	Y	65
2	WT	N	Y	50
2	WT	N	Y	55
2	WT	N	Y	50
2	WT	N	Y	45
2	WT	N	Y	40
2	WT	N	Y	40
2	WT	N	Y	55
2	WT	N	Y	40
2	WT	N	Y	40
2	WT	N	Y	35
2	WT	N	Y	25
2	WT	N	Y	55
2	WT	N	Y	30
2	WT	N	Y	35
2	WT	N	Y	40
2	WT	N	Y	40
2	WT	N	Y	30
2	WT	N	Y	35
2	WT	N	Y	30
2	WT	N	Y	30
2	WT	N	Y	50
2	WT	N	Y	65
2	WT	N	Y	45
2	WT	N	Y	30
2	WT	N	Y	35
2	WT	Y	N	25
2	WT	Y	N	25
2	WT	Y	N	25
2	WT	Y	N	20
2	WT	Y	N	30
2	WT	Y	N	20
2	WT	Y	N	20
2	WT	Y	N	20
2	WT	Y	N	20
2	WT	Y	N	25
2	WT	Y	N	20
2	WT	Y	N	25
2	WT	Y	N	15
2	WT	Y	N	20
2	WT	Y	N	25
2	WT	Y	N	20
2	WT	Y	N	30
2	WT	Y	N	20
2	WT	Y	N	20
2	WT	Y	N	25
2	WT	Y	N	25
2	WT	Y	N	20
2	WT	Y	N	20
2	WT	Y	N	25
2	WT	Y	N	25
2	WT	Y	N	20
2	WT	Y	N	20
2	WT	Y	N	35
2	WT	Y	N	20
2	WT	Y	N	25
2	WT	Y	N	20
2	WT	Y	N	25
2	WT	Y	N	20
2	WT	Y	N	20
2	WT	Y	N	20
2	WT	Y	N	20
2	WT	Y	N	25
2	WT	Y	N	20
2	WT	Y	N	30
2	WT	Y	N	20
2	WT	Y	N	20
2	WT	Y	N	20
2	WT	Y	N	20
2	WT	Y	N	20
2	WT	Y	N	20
2	WT	Y	N	20
2	WT	Y	N	25
2	WT	Y	N	25
2	WT	Y	N	25
2	WT	Y	N	25
2	WT	Y	Y	115
2	WT	Y	Y	25
2	WT	Y	Y	35
2	WT	Y	Y	25
2	WT	Y	Y	50
2	WT	Y	Y	65
2	WT	Y	Y	50
2	WT	Y	Y	70
2	WT	Y	Y	85
2	WT	Y	Y	20
2	WT	Y	Y	25
2	WT	Y	Y	65
2	WT	Y	Y	40
2	WT	Y	Y	25
2	WT	Y	Y	80
2	WT	Y	Y	35
2	WT	Y	Y	185
2	WT	Y	Y	25
2	WT	Y	Y	40
2	WT	Y	Y	105
2	WT	Y	Y	65
2	WT	Y	Y	25
2	WT	Y	Y	100
2	WT	Y	Y	35
2	WT	Y	Y	180
2	WT	Y	Y	90
2	WT	Y	Y	25
2	WT	Y	Y	45
2	WT	Y	Y	110
2	WT	Y	Y	100
2	WT	Y	Y	65
2	WT	Y	Y	95
2	WT	Y	Y	175
2	WT	Y	Y	40
2	WT	Y	Y	95
2	WT	Y	Y	35
2	WT	Y	Y	160
2	WT	Y	Y	20
2	WT	Y	Y	40
2	WT	Y	Y	65
2	WT	Y	Y	90
2	WT	Y	Y	160
2	WT	Y	Y	50
2	WT	Y	Y	70
2	WT	Y	Y	110
2	WT	Y	Y	60
2	WT	Y	Y	55
2	WT	Y	Y	55
2	WT	Y	Y	55
2	WT	Y	Y	185
2	C18R	N	N	20
2	C18R	N	N	25
2	C18R	N	N	20
2	C18R	N	N	20
2	C18R	N	N	20
2	C18R	N	N	20
2	C18R	N	N	20
2	C18R	N	N	25
2	C18R	N	N	25
2	C18R	N	N	20
2	C18R	N	N	20
2	C18R	N	N	20
2	C18R	N	N	25
2	C18R	N	N	20
2	C18R	N	N	50
2	C18R	N	N	20
2	C18R	N	N	20
2	C18R	N	N	25
2	C18R	N	N	20
2	C18R	N	N	20
2	C18R	N	N	20
2	C18R	N	N	25
2	C18R	N	N	25
2	C18R	N	N	20
2	C18R	N	N	20
2	C18R	N	N	25
2	C18R	N	N	30
2	C18R	N	N	20
2	C18R	N	N	25
2	C18R	N	N	20
2	C18R	N	N	20
2	C18R	N	N	25
2	C18R	N	N	30
2	C18R	N	N	25
2	C18R	N	N	20
2	C18R	N	N	25
2	C18R	N	N	20
2	C18R	N	N	25
2	C18R	N	N	20
2	C18R	N	N	20
2	C18R	N	N	20
2	C18R	N	N	30
2	C18R	N	N	20
2	C18R	N	N	25
2	C18R	N	N	25
2	C18R	N	N	20
2	C18R	N	N	30
2	C18R	N	N	25
2	C18R	N	N	25
2	C18R	N	N	20
2	C18R	N	Y	35
2	C18R	N	Y	35
2	C18R	N	Y	35
2	C18R	N	Y	30
2	C18R	N	Y	40
2	C18R	N	Y	45
2	C18R	N	Y	30
2	C18R	N	Y	45
2	C18R	N	Y	30
2	C18R	N	Y	30
2	C18R	N	Y	45
2	C18R	N	Y	45
2	C18R	N	Y	30
2	C18R	N	Y	30
2	C18R	N	Y	40
2	C18R	N	Y	45
2	C18R	N	Y	30
2	C18R	N	Y	40
2	C18R	N	Y	40
2	C18R	N	Y	30
2	C18R	N	Y	30
2	C18R	N	Y	25
2	C18R	N	Y	30
2	C18R	N	Y	30
2	C18R	N	Y	25
2	C18R	N	Y	35
2	C18R	N	Y	35
2	C18R	N	Y	45
2	C18R	N	Y	50
2	C18R	N	Y	20
2	C18R	N	Y	35
2	C18R	N	Y	30
2	C18R	N	Y	30
2	C18R	N	Y	20
2	C18R	N	Y	40
2	C18R	N	Y	40
2	C18R	N	Y	35
2	C18R	N	Y	50
2	C18R	N	Y	45
2	C18R	N	Y	60
2	C18R	N	Y	30
2	C18R	N	Y	40
2	C18R	N	Y	40
2	C18R	N	Y	40
2	C18R	N	Y	35
2	C18R	N	Y	30
2	C18R	N	Y	20
2	C18R	N	Y	45
2	C18R	N	Y	30
2	C18R	N	Y	30
2	C18R	Y	N	25
2	C18R	Y	N	20
2	C18R	Y	N	20
2	C18R	Y	N	25
2	C18R	Y	N	25
2	C18R	Y	N	25
2	C18R	Y	N	25
2	C18R	Y	N	20
2	C18R	Y	N	25
2	C18R	Y	N	20
2	C18R	Y	N	25
2	C18R	Y	N	20
2	C18R	Y	N	20
2	C18R	Y	N	35
2	C18R	Y	N	20
2	C18R	Y	N	20
2	C18R	Y	N	25
2	C18R	Y	N	20
2	C18R	Y	N	25
2	C18R	Y	N	25
2	C18R	Y	N	20
2	C18R	Y	N	20
2	C18R	Y	N	25
2	C18R	Y	N	25
2	C18R	Y	N	25
2	C18R	Y	N	20
2	C18R	Y	N	25
2	C18R	Y	N	25
2	C18R	Y	N	20
2	C18R	Y	N	25
2	C18R	Y	N	20
2	C18R	Y	N	20
2	C18R	Y	N	20
2	C18R	Y	N	25
2	C18R	Y	N	20
2	C18R	Y	N	25
2	C18R	Y	N	25
2	C18R	Y	N	30
2	C18R	Y	N	20
2	C18R	Y	N	25
2	C18R	Y	N	25
2	C18R	Y	N	20
2	C18R	Y	N	25
2	C18R	Y	N	25
2	C18R	Y	N	25
2	C18R	Y	N	25
2	C18R	Y	N	25
2	C18R	Y	N	20
2	C18R	Y	N	35
2	C18R	Y	N	20
2	C18R	Y	Y	50
2	C18R	Y	Y	30
2	C18R	Y	Y	40
2	C18R	Y	Y	25
2	C18R	Y	Y	35
2	C18R	Y	Y	50
2	C18R	Y	Y	40
2	C18R	Y	Y	40
2	C18R	Y	Y	30
2	C18R	Y	Y	40
2	C18R	Y	Y	35
2	C18R	Y	Y	35
2	C18R	Y	Y	40
2	C18R	Y	Y	35
2	C18R	Y	Y	40
2	C18R	Y	Y	35
2	C18R	Y	Y	35
2	C18R	Y	Y	35
2	C18R	Y	Y	30
2	C18R	Y	Y	50
2	C18R	Y	Y	25
2	C18R	Y	Y	40
2	C18R	Y	Y	35
2	C18R	Y	Y	30
2	C18R	Y	Y	20
2	C18R	Y	Y	30
2	C18R	Y	Y	30
2	C18R	Y	Y	35
2	C18R	Y	Y	40
2	C18R	Y	Y	40
2	C18R	Y	Y	30
2	C18R	Y	Y	40
2	C18R	Y	Y	65
2	C18R	Y	Y	45
2	C18R	Y	Y	25
2	C18R	Y	Y	30
2	C18R	Y	Y	25
2	C18R	Y	Y	35
2	C18R	Y	Y	30
2	C18R	Y	Y	30
2	C18R	Y	Y	40
2	C18R	Y	Y	55
2	C18R	Y	Y	30
2	C18R	Y	Y	25
2	C18R	Y	Y	35
2	C18R	Y	Y	25
2	C18R	Y	Y	30
2	C18R	Y	Y	25
2	C18R	Y	Y	35
2	C18R	Y	Y	45
3	WT	N	N	20
3	WT	N	N	25
3	WT	N	N	25
3	WT	N	N	25
3	WT	N	N	20
3	WT	N	N	25
3	WT	N	N	20
3	WT	N	N	20
3	WT	N	N	20
3	WT	N	N	30
3	WT	N	N	25
3	WT	N	N	20
3	WT	N	N	25
3	WT	N	N	20
3	WT	N	N	20
3	WT	N	N	25
3	WT	N	N	20
3	WT	N	N	20
3	WT	N	N	25
3	WT	N	N	20
3	WT	N	N	20
3	WT	N	N	20
3	WT	N	N	20
3	WT	N	N	20
3	WT	N	N	20
3	WT	N	N	20
3	WT	N	N	20
3	WT	N	N	20
3	WT	N	N	20
3	WT	N	N	25
3	WT	N	N	20
3	WT	N	N	20
3	WT	N	N	45
3	WT	N	N	20
3	WT	N	N	25
3	WT	N	N	20
3	WT	N	N	20
3	WT	N	N	25
3	WT	N	N	25
3	WT	N	N	20
3	WT	N	N	25
3	WT	N	N	20
3	WT	N	N	20
3	WT	N	N	25
3	WT	N	N	20
3	WT	N	N	20
3	WT	N	N	20
3	WT	N	N	20
3	WT	N	N	25
3	WT	N	N	25
3	WT	N	Y	35
3	WT	N	Y	100
3	WT	N	Y	45
3	WT	N	Y	40
3	WT	N	Y	60
3	WT	N	Y	40
3	WT	N	Y	55
3	WT	N	Y	60
3	WT	N	Y	35
3	WT	N	Y	55
3	WT	N	Y	20
3	WT	N	Y	35
3	WT	N	Y	30
3	WT	N	Y	45
3	WT	N	Y	35
3	WT	N	Y	25
3	WT	N	Y	45
3	WT	N	Y	60
3	WT	N	Y	55
3	WT	N	Y	40
3	WT	N	Y	35
3	WT	N	Y	40
3	WT	N	Y	65
3	WT	N	Y	35
3	WT	N	Y	35
3	WT	N	Y	35
3	WT	N	Y	45
3	WT	N	Y	50
3	WT	N	Y	35
3	WT	N	Y	40
3	WT	N	Y	50
3	WT	N	Y	35
3	WT	N	Y	45
3	WT	N	Y	25
3	WT	N	Y	40
3	WT	N	Y	40
3	WT	N	Y	25
3	WT	N	Y	50
3	WT	N	Y	30
3	WT	N	Y	55
3	WT	N	Y	75
3	WT	N	Y	35
3	WT	N	Y	45
3	WT	N	Y	30
3	WT	N	Y	30
3	WT	N	Y	35
3	WT	N	Y	40
3	WT	N	Y	45
3	WT	N	Y	35
3	WT	N	Y	40
3	WT	Y	N	25
3	WT	Y	N	25
3	WT	Y	N	30
3	WT	Y	N	20
3	WT	Y	N	20
3	WT	Y	N	20
3	WT	Y	N	25
3	WT	Y	N	25
3	WT	Y	N	25
3	WT	Y	N	25
3	WT	Y	N	25
3	WT	Y	N	25
3	WT	Y	N	65
3	WT	Y	N	25
3	WT	Y	N	25
3	WT	Y	N	20
3	WT	Y	N	25
3	WT	Y	N	20
3	WT	Y	N	25
3	WT	Y	N	25
3	WT	Y	N	25
3	WT	Y	N	20
3	WT	Y	N	25
3	WT	Y	N	25
3	WT	Y	N	20
3	WT	Y	N	20
3	WT	Y	N	20
3	WT	Y	N	25
3	WT	Y	N	25
3	WT	Y	N	30
3	WT	Y	N	20
3	WT	Y	N	25
3	WT	Y	N	25
3	WT	Y	N	20
3	WT	Y	N	20
3	WT	Y	N	25
3	WT	Y	N	30
3	WT	Y	N	20
3	WT	Y	N	20
3	WT	Y	N	30
3	WT	Y	N	25
3	WT	Y	N	30
3	WT	Y	N	20
3	WT	Y	N	25
3	WT	Y	N	20
3	WT	Y	N	20
3	WT	Y	N	20
3	WT	Y	N	25
3	WT	Y	N	50
3	WT	Y	N	25
3	WT	Y	Y	50
3	WT	Y	Y	45
3	WT	Y	Y	125
3	WT	Y	Y	145
3	WT	Y	Y	155
3	WT	Y	Y	45
3	WT	Y	Y	85
3	WT	Y	Y	35
3	WT	Y	Y	65
3	WT	Y	Y	60
3	WT	Y	Y	105
3	WT	Y	Y	150
3	WT	Y	Y	35
3	WT	Y	Y	100
3	WT	Y	Y	60
3	WT	Y	Y	145
3	WT	Y	Y	55
3	WT	Y	Y	225
3	WT	Y	Y	100
3	WT	Y	Y	60
3	WT	Y	Y	30
3	WT	Y	Y	105
3	WT	Y	Y	100
3	WT	Y	Y	35
3	WT	Y	Y	30
3	WT	Y	Y	35
3	WT	Y	Y	25
3	WT	Y	Y	25
3	WT	Y	Y	145
3	WT	Y	Y	50
3	WT	Y	Y	45
3	WT	Y	Y	30
3	WT	Y	Y	110
3	WT	Y	Y	70
3	WT	Y	Y	150
3	WT	Y	Y	35
3	WT	Y	Y	45
3	WT	Y	Y	25
3	WT	Y	Y	85
3	WT	Y	Y	30
3	WT	Y	Y	95
3	WT	Y	Y	30
3	WT	Y	Y	30
3	WT	Y	Y	85
3	WT	Y	Y	135
3	WT	Y	Y	45
3	WT	Y	Y	150
3	WT	Y	Y	110
3	WT	Y	Y	110
3	WT	Y	Y	80
3	C18R	N	N	20
3	C18R	N	N	20
3	C18R	N	N	20
3	C18R	N	N	20
3	C18R	N	N	20
3	C18R	N	N	25
3	C18R	N	N	20
3	C18R	N	N	20
3	C18R	N	N	20
3	C18R	N	N	25
3	C18R	N	N	25
3	C18R	N	N	20
3	C18R	N	N	25
3	C18R	N	N	20
3	C18R	N	N	25
3	C18R	N	N	25
3	C18R	N	N	30
3	C18R	N	N	25
3	C18R	N	N	25
3	C18R	N	N	20
3	C18R	N	N	25
3	C18R	N	N	20
3	C18R	N	N	25
3	C18R	N	N	20
3	C18R	N	N	15
3	C18R	N	N	40
3	C18R	N	N	20
3	C18R	N	N	25
3	C18R	N	N	30
3	C18R	N	N	20
3	C18R	N	N	20
3	C18R	N	N	20
3	C18R	N	N	20
3	C18R	N	N	25
3	C18R	N	N	25
3	C18R	N	N	25
3	C18R	N	N	20
3	C18R	N	N	25
3	C18R	N	N	25
3	C18R	N	N	20
3	C18R	N	N	30
3	C18R	N	N	20
3	C18R	N	N	30
3	C18R	N	N	25
3	C18R	N	N	20
3	C18R	N	N	25
3	C18R	N	N	20
3	C18R	N	N	25
3	C18R	N	N	25
3	C18R	N	N	25
3	C18R	N	Y	20
3	C18R	N	Y	30
3	C18R	N	Y	45
3	C18R	N	Y	45
3	C18R	N	Y	55
3	C18R	N	Y	50
3	C18R	N	Y	30
3	C18R	N	Y	30
3	C18R	N	Y	30
3	C18R	N	Y	35
3	C18R	N	Y	25
3	C18R	N	Y	25
3	C18R	N	Y	25
3	C18R	N	Y	25
3	C18R	N	Y	35
3	C18R	N	Y	50
3	C18R	N	Y	25
3	C18R	N	Y	35
3	C18R	N	Y	50
3	C18R	N	Y	50
3	C18R	N	Y	30
3	C18R	N	Y	25
3	C18R	N	Y	30
3	C18R	N	Y	70
3	C18R	N	Y	30
3	C18R	N	Y	30
3	C18R	N	Y	45
3	C18R	N	Y	40
3	C18R	N	Y	25
3	C18R	N	Y	25
3	C18R	N	Y	30
3	C18R	N	Y	30
3	C18R	N	Y	35
3	C18R	N	Y	50
3	C18R	N	Y	45
3	C18R	N	Y	30
3	C18R	N	Y	35
3	C18R	N	Y	45
3	C18R	N	Y	20
3	C18R	N	Y	25
3	C18R	N	Y	30
3	C18R	N	Y	25
3	C18R	N	Y	40
3	C18R	N	Y	45
3	C18R	N	Y	25
3	C18R	N	Y	25
3	C18R	N	Y	40
3	C18R	N	Y	45
3	C18R	N	Y	30
3	C18R	N	Y	35
3	C18R	Y	N	20
3	C18R	Y	N	20
3	C18R	Y	N	25
3	C18R	Y	N	20
3	C18R	Y	N	25
3	C18R	Y	N	25
3	C18R	Y	N	20
3	C18R	Y	N	20
3	C18R	Y	N	20
3	C18R	Y	N	60
3	C18R	Y	N	25
3	C18R	Y	N	20
3	C18R	Y	N	20
3	C18R	Y	N	20
3	C18R	Y	N	20
3	C18R	Y	N	20
3	C18R	Y	N	20
3	C18R	Y	N	20
3	C18R	Y	N	35
3	C18R	Y	N	20
3	C18R	Y	N	25
3	C18R	Y	N	20
3	C18R	Y	N	20
3	C18R	Y	N	20
3	C18R	Y	N	25
3	C18R	Y	N	20
3	C18R	Y	N	20
3	C18R	Y	N	20
3	C18R	Y	N	20
3	C18R	Y	N	35
3	C18R	Y	N	25
3	C18R	Y	N	20
3	C18R	Y	N	20
3	C18R	Y	N	25
3	C18R	Y	N	20
3	C18R	Y	N	25
3	C18R	Y	N	20
3	C18R	Y	N	20
3	C18R	Y	N	25
3	C18R	Y	N	25
3	C18R	Y	N	35
3	C18R	Y	N	20
3	C18R	Y	N	25
3	C18R	Y	N	20
3	C18R	Y	N	25
3	C18R	Y	N	20
3	C18R	Y	N	20
3	C18R	Y	N	20
3	C18R	Y	N	35
3	C18R	Y	N	20
3	C18R	Y	Y	25
3	C18R	Y	Y	25
3	C18R	Y	Y	25
3	C18R	Y	Y	25
3	C18R	Y	Y	30
3	C18R	Y	Y	30
3	C18R	Y	Y	60
3	C18R	Y	Y	25
3	C18R	Y	Y	30
3	C18R	Y	Y	35
3	C18R	Y	Y	30
3	C18R	Y	Y	30
3	C18R	Y	Y	45
3	C18R	Y	Y	25
3	C18R	Y	Y	35
3	C18R	Y	Y	40
3	C18R	Y	Y	35
3	C18R	Y	Y	25
3	C18R	Y	Y	30
3	C18R	Y	Y	40
3	C18R	Y	Y	45
3	C18R	Y	Y	35
3	C18R	Y	Y	35
3	C18R	Y	Y	40
3	C18R	Y	Y	30
3	C18R	Y	Y	35
3	C18R	Y	Y	25
3	C18R	Y	Y	40
3	C18R	Y	Y	35
3	C18R	Y	Y	35
3	C18R	Y	Y	25
3	C18R	Y	Y	25
3	C18R	Y	Y	45
3	C18R	Y	Y	20
3	C18R	Y	Y	45
3	C18R	Y	Y	40
3	C18R	Y	Y	30
3	C18R	Y	Y	40
3	C18R	Y	Y	50
3	C18R	Y	Y	35
3	C18R	Y	Y	35
3	C18R	Y	Y	60
3	C18R	Y	Y	25
3	C18R	Y	Y	35
3	C18R	Y	Y	45
3	C18R	Y	Y	35
3	C18R	Y	Y	30
3	C18R	Y	Y	30
3	C18R	Y	Y	45
3	C18R	Y	Y	55

## Sheet: Figure5D
Replicate 1
	TRIM37				TRIM37 C18R
Induced	DMSO	DMSO	DOX	DOX	DMSO	DMSO	DOX	DOX
Centrinone	DMSO	Centrinone	DMSO	Centrinone	DMSO	Centrinone	DMSO	Centrinone
multipolar	2	0	0	1	4	0	0	0
biploar	28	17	30	4	30	23	30	16
monopolar	0	13	0	19	0	7	0	13
none	0	0	0	7	0	0	0	1
Replicate 2
	TRIM37				TRIM37 C18R
Induced	DMSO	DMSO	DOX	DOX	DMSO	DMSO	DOX	DOX
Centrinone	DMSO	Centrinone	DMSO	Centrinone	DMSO	Centrinone	DMSO	Centrinone
multipolar	2	0	0	0	3	0	0	1
biploar	28	23	30	3	28	21	32	18
monopolar	0	6	0	12	0	8	0	8
none	0	2	0	14	0	1	0	1
Replicate 3
	TRIM37				TRIM37 C18R
Induced	DMSO	DMSO	DOX	DOX	DMSO	DMSO	DOX	DOX
Centrinone	DMSO	Centrinone	DMSO	Centrinone	DMSO	Centrinone	DMSO	Centrinone
multipolar	0	0	0	0	3	0	1	0
biploar	30	27	30	8	27	26	28	17
monopolar	0	4	0	16	0	2	0	13
none	0	2	0	6	0	1	0	0
