# Supplementary material for: Global cellular response to chemical perturbation of PLK4 activity and abnormal centrosome number
Source: eLife. 2022 Jun 27;11:e73944. doi: 10.7554/eLife.73944 (PMC9236612; doi:10.7554/eLife.73944)
Supplement: Figure 6—figure supplement 2—source data 1. [file elife-73944-fig6-figsupp2-data1.xlsx]

## Sheet: SuppFigure6_2D
Replicate	Treatment	Image	Total cells	CNTROB positive
1	DMSO	1	7	5
1	DMSO	2	11	7
1	DMSO	3	10	5
1	DMSO	4	11	5
1	DMSO	5	9	3
1	DMSO	6	10	3
1	DMSO	7	11	6
1	DMSO	8	10	8
1	DMSO	9	11	6
1	DMSO	10	9	4
2	DMSO	1	11	6
2	DMSO	2	11	6
2	DMSO	3	12	7
2	DMSO	4	11	6
2	DMSO	5	10	6
2	DMSO	6	10	5
2	DMSO	7	9	4
2	DMSO	8	8	3
2	DMSO	9	7	3
2	DMSO	10	11	4
3	DMSO	1	12	6
3	DMSO	2	8	5
3	DMSO	3	10	5
3	DMSO	4	9	3
3	DMSO	5	8	4
3	DMSO	6	10	5
3	DMSO	7	15	4
3	DMSO	8	8	4
3	DMSO	9	12	5
3	DMSO	10	8	4
1	Cent	1	7	3
1	Cent	2	11	7
1	Cent	3	7	4
1	Cent	4	6	5
1	Cent	5	7	3
1	Cent	6	10	6
1	Cent	7	11	7
1	Cent	8	8	3
1	Cent	9	8	7
1	Cent	10	10	4
2	Cent	1	8	5
2	Cent	2	9	6
2	Cent	3	7	7
2	Cent	4	9	6
2	Cent	5	10	6
2	Cent	6	10	5
2	Cent	7	11	6
2	Cent	8	12	4
2	Cent	9	9	5
2	Cent	10	12	9
3	Cent	1	10	3
3	Cent	2	8	5
3	Cent	3	9	5
3	Cent	4	9	3
3	Cent	5	9	4
3	Cent	6	11	5
3	Cent	7	14	7
3	Cent	8	9	5
3	Cent	9	12	6
3	Cent	10	10	5

## Sheet: SuppFigure6_2E
Replicate	Line	Total cells	Number with ectopic CEP120
1	WT	49	0
1	dTRIM37	53	28
1	FB	80	35
1	FBT37	49	2
1	FBC18R	84	42
1	FBdRING	62	38
2	WT	55	0
2	dTRIM37	54	32
2	FB	58	30
2	FBT37	35	0
2	FBC18R	68	36
2	FBdRING	58	30
3	WT	60	0
3	dTRIM37	56	35
3	FB	68	40
3	FBT37	50	0
3	FBC18R	62	22
3	FBdRING	57	34
