# Supplementary material for: Global cellular response to chemical perturbation of PLK4 activity and abnormal centrosome number
Source: eLife. 2022 Jun 27;11:e73944. doi: 10.7554/eLife.73944 (PMC9236612; doi:10.7554/eLife.73944)
Supplement: Figure 7—figure supplement 1—source data 1. [file elife-73944-fig7-figsupp1-data1.xlsx]

## Sheet: SuppFigure7_1D
Replicate	Image	TRIM37 rescue construct	Mean cytoplasmic BirA intensity
1	1	505-709	0.0213424
1	1	505-709	0.0185659
1	1	505-709	0.0274029
1	1	505-709	0.0115775
1	1	505-709	0.0191151
1	1	505-709	0.00116366
1	1	505-709	0.013011
1	1	505-709	0.0130259
1	1	505-709	0.0298322
1	1	505-709	0.0299027
1	1	505-709	0.00875686
1	1	505-709	0.00279281
1	1	505-709	0.0207727
1	1	505-709	0.0536077
1	1	505-709	0.00400297
1	1	505-709	0.0247819
1	1	505-709	0.025534
1	1	505-709	0.0310508
1	1	505-709	0.0363094
1	1	505-709	0.0191854
1	1	505-709	0.0299154
1	1	505-709	0.0173614
1	1	505-709	0.0130287
1	1	505-709	0.00600734
1	1	505-709	0.0265668
1	1	505-709	0.0211725
1	1	505-709	0.0201424
1	1	505-709	0.0208784
1	1	505-709	0.0137126
1	1	505-709	0.0214678
1	1	505-709	0.0201125
1	1	505-709	0.0201257
1	1	505-709	0.0116676
1	1	505-709	0.0183419
1	1	505-709	0.0370725
1	1	505-709	0.0130765
1	1	505-709	0.0337526
1	1	505-709	0.0100273
1	1	505-709	0.0197515
1	1	505-709	0.0450175
1	1	505-709	0.0401083
1	1	505-709	0.0123974
1	1	505-709	0.0262025
1	1	505-709	0.0151393
1	1	505-709	0.0398186
1	1	505-709	0.0193283
1	1	505-709	0.00821641
1	1	505-709	0.0115669
1	1	505-709	0.0355376
1	1	505-709	0.00377725
1	1	505-709	0.00792907
1	1	505-709	0.00824713
1	1	505-709	0.00572503
1	1	505-709	0.0156692
1	1	505-709	0.00903255
1	1	505-709	0.0127375
1	1	505-709	0.0214602
1	1	505-709	0.0104954
1	1	505-709	0.0205995
1	1	505-709	0.0268571
1	1	505-709	0.00908875
1	1	505-709	0.0153282
1	1	505-709	0.0101109
1	1	505-709	0.0232455
1	1	505-709	0.0320979
1	1	505-709	0.0211224
1	1	505-709	0.0130548
1	1	505-709	0.0179389
1	1	505-709	0.029193
1	1	505-709	0.00313445
1	1	505-709	0.0236401
1	1	505-709	0.00762579
1	1	505-709	0.0187488
1	1	505-709	0.0192394
1	1	505-709	0.0333872
1	1	505-709	0.00789918
1	1	505-709	0.0226249
1	1	505-709	0.0170602
1	1	505-709	0.0300865
1	1	505-709	0.00159606
1	1	505-709	0.0261368
1	2	505-709	0.00380843
1	2	505-709	0.00234274
1	2	505-709	0.00253561
1	2	505-709	0.00222337
1	2	505-709	0.00141863
1	2	505-709	0.00214151
1	2	505-709	0.00186582
1	2	505-709	0.00098639
1	2	505-709	0.00420769
1	2	505-709	0.00191075
1	2	505-709	0.00630853
1	2	505-709	0.00489239
1	2	505-709	0.00300108
1	2	505-709	0.0020161
1	2	505-709	0.00180379
1	2	505-709	0.00282196
1	2	505-709	0.00515382
1	2	505-709	0.00220773
1	2	505-709	0.00423233
1	2	505-709	0.00370014
1	2	505-709	0.0031591
1	2	505-709	0.00238366
1	2	505-709	0.00241069
1	2	505-709	0.00392252
1	2	505-709	0.00454169
1	2	505-709	0.002631
1	2	505-709	0.00444586
1	2	505-709	0.00394152
1	2	505-709	0.00264261
1	2	505-709	0.00234745
1	2	505-709	0.00267933
1	2	505-709	0.00194108
1	2	505-709	0.00211787
1	2	505-709	0.000846816
1	2	505-709	0.00462527
1	2	505-709	0.00272298
1	2	505-709	0.00276203
1	2	505-709	0.00404383
1	2	505-709	0.00137888
1	2	505-709	0.00134784
1	2	505-709	0.00203191
1	2	505-709	0.00286608
1	2	505-709	0.00142093
1	2	505-709	0.00246238
1	2	505-709	0.00340069
1	2	505-709	0.00158515
1	2	505-709	0.00334437
1	2	505-709	0.00271976
1	3	505-709	0.0233375
1	3	505-709	0.0055602
1	3	505-709	0.00530834
1	3	505-709	0.00499149
1	3	505-709	0.00946286
1	3	505-709	0.00757173
1	3	505-709	0.0120342
1	3	505-709	0.0135858
1	3	505-709	0.00539798
1	3	505-709	0.0145687
1	3	505-709	0.0173956
1	3	505-709	0.00263282
1	3	505-709	0.0136065
1	3	505-709	0.0107086
1	3	505-709	0.00972273
1	3	505-709	0.0294101
1	3	505-709	0.00981907
1	3	505-709	0.00702924
1	3	505-709	0.0075225
1	3	505-709	0.00750037
1	3	505-709	0.00418842
1	3	505-709	0.0203711
1	3	505-709	0.00179623
1	3	505-709	0.00192399
1	3	505-709	0.0126766
1	3	505-709	0.00375884
1	3	505-709	0.0246225
1	3	505-709	0.00298258
1	3	505-709	0.0186205
1	3	505-709	0.00508809
1	3	505-709	0.00654704
1	3	505-709	0.00318884
1	3	505-709	0.00319783
1	3	505-709	0.0208785
1	3	505-709	0.0096305
1	3	505-709	0.0283265
1	3	505-709	0.00227956
1	3	505-709	0.00381484
1	3	505-709	0.0181176
1	3	505-709	0.0144533
1	3	505-709	0.0276668
1	3	505-709	0.0133313
1	3	505-709	0.0137963
1	3	505-709	0.00944976
1	3	505-709	0.00671678
1	3	505-709	0.00599425
1	3	505-709	0.0220288
1	3	505-709	0.0159278
1	3	505-709	0.00873847
1	3	505-709	0.0101765
1	3	505-709	0.00231573
1	3	505-709	0.00911489
1	3	505-709	0.0351798
1	3	505-709	0.00772311
1	3	505-709	0.00664474
1	3	505-709	0.0116742
1	3	505-709	0.00959647
1	3	505-709	0.0182118
1	3	505-709	0.00299813
1	3	505-709	0.0113515
1	3	505-709	0.00244958
1	3	505-709	0.000438182
1	3	505-709	0.0105466
1	3	505-709	0.00766209
1	3	505-709	0.00862448
1	3	505-709	0.0123848
1	3	505-709	0.0127112
1	3	505-709	0.0213878
1	3	505-709	0.0141729
1	3	505-709	0.00870511
1	3	505-709	0.0227308
1	3	505-709	0.00579315
1	3	505-709	0.0129421
1	3	505-709	0.00182417
1	3	505-709	0.00236412
1	3	505-709	0.0128353
1	3	505-709	0.0198504
1	3	505-709	0.0145832
1	3	505-709	0.00299581
1	3	505-709	0.00659095
1	3	505-709	0.00995204
1	3	505-709	0.014123
1	3	505-709	0.00823087
1	4	505-709	0.0208387
1	4	505-709	0.00733251
1	4	505-709	0.00152169
1	4	505-709	0.0204943
1	4	505-709	0.0117531
1	4	505-709	0.00928605
1	4	505-709	0.00820535
1	4	505-709	0.012782
1	4	505-709	0.00391456
1	4	505-709	0.0272677
1	4	505-709	0.00532593
1	4	505-709	0.0167641
1	4	505-709	0.00635256
1	4	505-709	0.00441608
1	4	505-709	0.0167878
1	4	505-709	0.0122565
1	4	505-709	0.00837024
1	4	505-709	0.0108414
1	4	505-709	0.0118468
1	4	505-709	0.00229236
1	4	505-709	0.00448163
1	4	505-709	0.0176015
1	4	505-709	0.0055576
1	4	505-709	0.00998151
1	4	505-709	0.0089743
1	4	505-709	0.0162031
1	4	505-709	0.0115656
1	4	505-709	0.00477812
1	4	505-709	0.00650126
1	4	505-709	0.0151823
1	4	505-709	0.00826315
1	4	505-709	0.00308643
1	4	505-709	0.0106776
1	4	505-709	0.0212762
1	4	505-709	0.00142504
1	4	505-709	0.0145103
1	4	505-709	0.00457027
1	4	505-709	0.00624183
1	4	505-709	0.00964987
1	4	505-709	0.0186385
1	4	505-709	0.011604
1	4	505-709	0.00834287
1	4	505-709	0.00163445
1	4	505-709	0.00415947
1	4	505-709	0.00432387
1	4	505-709	0.00360931
1	4	505-709	0.00414685
1	4	505-709	0.0134584
1	4	505-709	0.00906732
1	4	505-709	0.00440547
1	4	505-709	0.00562372
1	4	505-709	0.0140958
1	4	505-709	0.00702314
1	4	505-709	0.00492933
1	4	505-709	0.00288088
1	4	505-709	0.00380432
1	4	505-709	0.0194787
1	4	505-709	0.00368446
1	4	505-709	0.00833963
1	4	505-709	0.00887074
1	4	505-709	0.0112568
1	4	505-709	0.00813713
1	4	505-709	0.0178203
1	4	505-709	0.00671112
1	4	505-709	0.00529814
1	4	505-709	0.00533487
1	4	505-709	0.0159308
1	4	505-709	0.0162923
1	4	505-709	0.00787596
1	4	505-709	0.0115088
1	4	505-709	0.00245254
1	4	505-709	0.00915104
1	4	505-709	0.0118526
1	4	505-709	0.00115868
1	4	505-709	0.000373122
1	4	505-709	0.00650484
1	4	505-709	0.0161446
1	4	505-709	0.0108274
1	4	505-709	0.0100085
1	4	505-709	0.0038939
1	4	505-709	0.0112521
1	4	505-709	0.0109084
1	4	505-709	0.0142251
1	4	505-709	0.00667657
1	4	505-709	0.0116999
1	4	505-709	0.00447354
1	4	505-709	0.00183452
1	4	505-709	0.0176717
1	4	505-709	0.0228158
1	5	505-709	0.00962989
1	5	505-709	0.0209357
1	5	505-709	0.00974301
1	5	505-709	0.00954824
1	5	505-709	0.0448691
1	5	505-709	0.0288112
1	5	505-709	0.0132362
1	5	505-709	0.0390944
1	5	505-709	0.0233068
1	5	505-709	0.0246758
1	5	505-709	0.00307293
1	5	505-709	0.0282274
1	5	505-709	0.00630623
1	5	505-709	0.0275962
1	5	505-709	0.0153169
1	5	505-709	0.0276065
1	5	505-709	0.0267502
1	5	505-709	0.0159774
1	5	505-709	0.0353759
1	5	505-709	0.025137
1	5	505-709	0.019539
1	5	505-709	0.0238432
1	5	505-709	0.0160763
1	5	505-709	0.0423029
1	5	505-709	0.0257159
1	5	505-709	0.00886213
1	5	505-709	0.00381096
1	5	505-709	0.0369637
1	5	505-709	0.0317356
1	5	505-709	0.0234091
1	5	505-709	0.00119075
1	5	505-709	0.0381349
1	5	505-709	0.0146748
1	5	505-709	0.0185871
1	5	505-709	0.00946206
1	5	505-709	0.00951071
1	5	505-709	0.00672634
1	5	505-709	0.00857779
1	5	505-709	0.0139034
1	5	505-709	0.0147213
1	5	505-709	0.0088834
1	5	505-709	0.0117146
1	5	505-709	0.0287905
1	5	505-709	0.0120323
1	5	505-709	0.0102632
1	5	505-709	0.0221726
1	5	505-709	0.0231226
1	5	505-709	0.0134804
1	5	505-709	0.0345802
1	5	505-709	0.0154187
1	5	505-709	0.0152147
1	5	505-709	0.00868603
1	5	505-709	0.0303841
1	5	505-709	0.0089863
1	5	505-709	0.0111047
1	5	505-709	0.0030754
1	5	505-709	0.0128872
1	5	505-709	0.0135952
1	5	505-709	0.0168586
1	5	505-709	0.0399743
1	5	505-709	0.00710473
1	5	505-709	0.00251946
1	5	505-709	0.00108703
1	5	505-709	0.0266297
1	5	505-709	0.0163731
1	5	505-709	0.0282579
1	5	505-709	0.00205143
1	5	505-709	0.0302181
1	5	505-709	0.00183134
1	5	505-709	0.0144125
1	5	505-709	0.00914058
1	5	505-709	0.0141206
1	5	505-709	0.0129346
1	5	505-709	0.00984545
1	5	505-709	0.00938249
1	5	505-709	0.0114314
1	5	505-709	0.0331291
1	5	505-709	0.00423266
1	5	505-709	0.00516239
1	5	505-709	0.0209625
1	5	505-709	0.0243575
1	5	505-709	0.00262172
1	5	505-709	0.0300807
1	5	505-709	0.0287472
1	5	505-709	0.016344
1	5	505-709	0.00357376
1	5	505-709	0.0326009
1	5	505-709	0.0189682
1	5	505-709	0.0153692
1	5	505-709	0.020195
1	5	505-709	0.0100444
1	5	505-709	0.0250383
1	5	505-709	0.0121557
1	5	505-709	0.0156632
1	5	505-709	0.00480754
2	6	505-709	0.0062564
2	6	505-709	0.00381579
2	6	505-709	0.0125202
2	6	505-709	0.0140808
2	6	505-709	0.00684217
2	6	505-709	0.0055478
2	6	505-709	0.00658201
2	6	505-709	0.000974752
2	6	505-709	0.0092374
2	6	505-709	0.0122835
2	6	505-709	0.0126589
2	6	505-709	0.00412216
2	6	505-709	0.00814851
2	6	505-709	0.00548961
2	6	505-709	0.0114347
2	6	505-709	0.00843541
2	6	505-709	0.00238452
2	6	505-709	0.00764635
2	6	505-709	0.00527324
2	6	505-709	0.00479591
2	6	505-709	0.00715967
2	6	505-709	0.00287065
2	6	505-709	0.00196701
2	6	505-709	0.0101587
2	6	505-709	0.00247257
2	6	505-709	0.0105098
2	6	505-709	0.00216947
2	6	505-709	0.00775634
2	6	505-709	0.00476582
2	6	505-709	0.00200169
2	6	505-709	0.00341986
2	6	505-709	0.00243708
2	6	505-709	0.00331336
2	6	505-709	0.00206722
2	6	505-709	0.000581098
2	6	505-709	0.00494306
2	6	505-709	0.00347361
2	6	505-709	0.00448299
2	6	505-709	0.00206871
2	6	505-709	0.00746143
2	6	505-709	0.00564333
2	6	505-709	0.00681772
2	6	505-709	0.00355129
2	6	505-709	0.00697146
2	6	505-709	0.00171595
2	6	505-709	0.00565446
2	6	505-709	0.00262983
2	6	505-709	0.00526903
2	6	505-709	0.00587237
2	6	505-709	0.00275145
2	6	505-709	0.00602435
2	6	505-709	0.00589331
2	6	505-709	0.000861528
2	6	505-709	0.00225802
2	6	505-709	0.00287336
2	6	505-709	0.00723442
2	6	505-709	0.00693267
2	6	505-709	0.00879707
2	6	505-709	0.00372594
2	6	505-709	0.0107174
2	6	505-709	0.00230651
2	6	505-709	0.00996993
2	6	505-709	0.00331274
2	6	505-709	0.00628764
2	6	505-709	0.00843228
2	6	505-709	0.00084265
2	6	505-709	0.00047725
2	6	505-709	0.00991928
2	6	505-709	0.0031334
2	6	505-709	0.0024598
2	6	505-709	0.00762169
2	6	505-709	0.00253871
2	6	505-709	0.00167622
2	6	505-709	0.0111186
2	6	505-709	0.0117862
2	7	505-709	0.00956757
2	7	505-709	0.0117879
2	7	505-709	0.0173235
2	7	505-709	0.018951
2	7	505-709	0.0147637
2	7	505-709	0.0159332
2	7	505-709	0.0135661
2	7	505-709	0.0404726
2	7	505-709	0.0100571
2	7	505-709	0.0263347
2	7	505-709	0.0163043
2	7	505-709	0.00719502
2	7	505-709	0.0100829
2	7	505-709	0.0223612
2	7	505-709	0.0261958
2	7	505-709	0.0251841
2	7	505-709	0.0260672
2	7	505-709	0.0127713
2	7	505-709	0.0255449
2	7	505-709	0.024941
2	7	505-709	0.0263671
2	7	505-709	0.00202818
2	7	505-709	0.0236787
2	7	505-709	0.0139813
2	7	505-709	0.0160329
2	7	505-709	0.0066126
2	7	505-709	0.0306034
2	7	505-709	0.00368859
2	7	505-709	0.0147175
2	7	505-709	0.00205536
2	7	505-709	0.0068699
2	7	505-709	0.0292028
2	7	505-709	0.0247485
2	7	505-709	0.0219934
2	7	505-709	0.00629432
2	7	505-709	0.0150478
2	7	505-709	0.00372999
2	7	505-709	0.00593079
2	7	505-709	0.0304602
2	7	505-709	0.00594137
2	7	505-709	0.00853482
2	7	505-709	0.0219342
2	7	505-709	0.0235987
2	7	505-709	0.01731
2	7	505-709	0.0362507
2	7	505-709	0.0124865
2	7	505-709	0.021999
2	7	505-709	0.01679
2	7	505-709	0.00751041
2	7	505-709	0.00884955
2	7	505-709	0.0161248
2	7	505-709	0.0151924
2	7	505-709	0.0106935
2	7	505-709	0.0272431
2	7	505-709	0.0159133
2	7	505-709	0.0153926
2	7	505-709	0.00965504
2	7	505-709	0.0257393
2	7	505-709	0.0108399
2	7	505-709	0.0339153
2	7	505-709	0.0191635
2	7	505-709	0.0247115
2	7	505-709	0.0302219
2	7	505-709	0.00865354
2	7	505-709	0.0266617
2	7	505-709	0.012672
2	7	505-709	0.0287967
2	7	505-709	0.0102755
2	7	505-709	0.00868985
2	7	505-709	0.0155507
2	7	505-709	0.015869
2	7	505-709	0.0153486
2	7	505-709	0.00903525
2	7	505-709	0.00714796
2	7	505-709	0.00597718
2	7	505-709	0.00756612
2	7	505-709	0.0129495
2	7	505-709	0.00298389
2	7	505-709	0.0183125
2	7	505-709	0.0359482
2	7	505-709	0.00452118
2	7	505-709	0.0461597
2	7	505-709	0.0254582
2	7	505-709	0.033503
2	7	505-709	0.00609762
2	7	505-709	0.0158978
2	7	505-709	0.00543443
2	7	505-709	0.015855
2	7	505-709	0.0106333
2	8	505-709	0.00776717
2	8	505-709	0.00768631
2	8	505-709	0.00216769
2	8	505-709	0.00639326
2	8	505-709	0.0283317
2	8	505-709	0.0110932
2	8	505-709	0.00285741
2	8	505-709	0.00259449
2	8	505-709	0.00412064
2	8	505-709	0.0032118
2	8	505-709	0.00941415
2	8	505-709	0.0128879
2	8	505-709	0.0044967
2	8	505-709	0.00684876
2	8	505-709	0.00567936
2	8	505-709	0.00921009
2	8	505-709	0.00870963
2	8	505-709	0.00407221
2	8	505-709	0.00775088
2	8	505-709	0.0184293
2	8	505-709	0.00714767
2	8	505-709	0.00683243
2	8	505-709	0.00657498
2	8	505-709	0.0127453
2	8	505-709	0.0146571
2	8	505-709	0.00496668
2	8	505-709	0.00892052
2	8	505-709	0.00485669
2	8	505-709	0.00465886
2	8	505-709	0.00246795
2	8	505-709	0.00833025
2	8	505-709	0.0153967
2	8	505-709	0.00260235
2	8	505-709	0.0220229
2	8	505-709	0.00603421
2	8	505-709	0.0117308
2	8	505-709	0.011078
2	8	505-709	0.0133127
2	8	505-709	0.00795066
2	8	505-709	0.0284575
2	8	505-709	0.011705
2	8	505-709	0.0207514
2	8	505-709	0.0233536
2	8	505-709	0.0188123
2	8	505-709	0.00715234
2	8	505-709	0.00321856
2	8	505-709	0.0245171
2	8	505-709	0.00131478
2	8	505-709	0.00831069
2	8	505-709	0.00392494
2	8	505-709	0.0120389
2	8	505-709	0.0129654
2	8	505-709	0.00816797
2	8	505-709	0.00240586
2	8	505-709	0.00927538
2	8	505-709	0.0146709
2	8	505-709	0.00557948
2	8	505-709	0.00993084
2	8	505-709	0.00942318
2	8	505-709	0.0155778
2	8	505-709	0.00587675
2	8	505-709	0.00542885
2	8	505-709	0.0117898
2	8	505-709	0.0195213
2	8	505-709	0.00548799
2	8	505-709	0.00690173
2	8	505-709	0.0141284
2	8	505-709	0.00762046
2	8	505-709	0.00116589
2	8	505-709	0.00549307
2	8	505-709	0.0150361
2	8	505-709	0.0102762
2	8	505-709	0.00672741
2	8	505-709	0.00887714
2	8	505-709	0.0285875
2	8	505-709	0.00376153
2	8	505-709	0.00317835
2	8	505-709	0.00578143
2	8	505-709	0.00654436
2	8	505-709	0.0144334
2	8	505-709	0.00435173
2	8	505-709	0.00386972
2	9	505-709	0.0107887
2	9	505-709	0.0120207
2	9	505-709	0.00657417
2	9	505-709	0.00840388
2	9	505-709	0.0112742
2	9	505-709	0.012627
2	9	505-709	0.00942686
2	9	505-709	0.00933478
2	9	505-709	0.00846377
2	9	505-709	0.00686971
2	9	505-709	0.014648
2	9	505-709	0.0120403
2	9	505-709	0.0149892
2	9	505-709	0.0146694
2	9	505-709	0.01025
2	9	505-709	0.0117155
2	9	505-709	0.0268734
2	9	505-709	0.0150013
2	9	505-709	0.00697686
2	9	505-709	0.0115265
2	9	505-709	0.0206101
2	9	505-709	0.00327179
2	9	505-709	0.0295649
2	9	505-709	0.0208845
2	9	505-709	0.00793146
2	9	505-709	0.00596797
2	9	505-709	0.0082232
2	9	505-709	0.00820268
2	9	505-709	0.0074642
2	9	505-709	0.00497028
2	9	505-709	0.0129333
2	9	505-709	0.00986344
2	9	505-709	0.0277065
2	9	505-709	0.00366672
2	9	505-709	0.00688232
2	9	505-709	0.00857492
2	9	505-709	0.0035755
2	9	505-709	0.00805352
2	9	505-709	0.0206025
2	9	505-709	0.000980526
2	9	505-709	0.0088232
2	9	505-709	0.00916864
2	9	505-709	0.0122465
2	9	505-709	0.00597004
2	9	505-709	0.0203598
2	9	505-709	0.0168896
2	9	505-709	0.00994222
2	9	505-709	0.000667034
2	9	505-709	0.0100231
2	9	505-709	0.00525824
2	9	505-709	0.00980937
2	9	505-709	0.0111779
2	9	505-709	0.00348922
2	9	505-709	0.00736717
2	9	505-709	0.00830792
2	9	505-709	0.00848884
2	9	505-709	0.00483638
2	9	505-709	0.00806125
2	9	505-709	0.00818287
2	9	505-709	0.00948991
2	9	505-709	0.0200196
2	9	505-709	0.00301596
2	9	505-709	0.0149826
2	9	505-709	0.0210757
2	9	505-709	0.00862066
2	10	505-709	0.0286502
2	10	505-709	0.0414753
2	10	505-709	0.00639297
2	10	505-709	0.0134759
2	10	505-709	0.012002
2	10	505-709	0.0338348
2	10	505-709	0.0872789
2	10	505-709	0.0122034
2	10	505-709	0.0152143
2	10	505-709	0.00323501
2	10	505-709	0.0157956
2	10	505-709	0.0131168
2	10	505-709	0.0190815
2	10	505-709	0.0164133
2	10	505-709	0.00307993
2	10	505-709	0.00114157
2	10	505-709	0.0224764
2	10	505-709	0.0290721
2	10	505-709	0.00616068
2	10	505-709	0.0114418
2	10	505-709	0.0253258
2	10	505-709	0.0166291
2	10	505-709	0.0186433
2	10	505-709	0.00465295
2	10	505-709	0.0364988
2	10	505-709	0.00289457
2	10	505-709	0.0226487
2	10	505-709	0.02229
2	10	505-709	0.00308006
2	10	505-709	0.00904818
2	10	505-709	0.0172104
2	10	505-709	0.00952612
2	10	505-709	0.0347304
2	10	505-709	0.00592687
2	10	505-709	0.0108652
2	10	505-709	0.0111756
2	10	505-709	0.0123052
2	10	505-709	0.00295644
2	10	505-709	0.0306464
2	10	505-709	0.0113229
2	10	505-709	0.032482
2	10	505-709	0.0240061
2	10	505-709	0.0424251
2	10	505-709	0.0241711
2	10	505-709	0.01296
2	10	505-709	0.0232692
2	10	505-709	0.0113898
2	10	505-709	0.0140906
2	10	505-709	0.00540909
2	10	505-709	0.0116426
2	10	505-709	0.0118813
2	10	505-709	0.026376
2	10	505-709	0.0230611
2	10	505-709	0.000816374
2	10	505-709	0.0112084
2	10	505-709	0.0384738
2	10	505-709	0.0131976
2	10	505-709	0.015827
2	10	505-709	0.0112303
2	10	505-709	0.0254069
2	10	505-709	0.0161601
2	10	505-709	0.0154328
2	10	505-709	0.0138708
2	10	505-709	0.0209552
2	10	505-709	0.00834243
2	10	505-709	0.0117565
2	10	505-709	0.0200817
2	10	505-709	0.00719839
2	10	505-709	0.0119452
2	10	505-709	0.0129327
2	10	505-709	0.00677735
3	11	505-709	0.00489088
3	11	505-709	0.0157186
3	11	505-709	0.0348844
3	11	505-709	0.0142212
3	11	505-709	0.0235973
3	11	505-709	0.0524959
3	11	505-709	0.0124994
3	11	505-709	0.0265881
3	11	505-709	0.00986541
3	11	505-709	0.00656033
3	11	505-709	0.00886431
3	11	505-709	0.0328978
3	11	505-709	0.0351295
3	11	505-709	0.0152502
3	11	505-709	0.0232729
3	11	505-709	0.00913037
3	11	505-709	0.0237628
3	11	505-709	0.0118594
3	11	505-709	0.00772552
3	11	505-709	0.0273215
3	11	505-709	0.00770893
3	11	505-709	0.008258
3	11	505-709	0.00705212
3	11	505-709	0.0374612
3	11	505-709	0.00667138
3	11	505-709	0.014221
3	11	505-709	0.00677505
3	11	505-709	0.00831511
3	11	505-709	0.0140471
3	11	505-709	0.00459691
3	11	505-709	0.0136782
3	11	505-709	0.0100023
3	11	505-709	0.00439018
3	11	505-709	0.013241
3	11	505-709	0.020463
3	11	505-709	0.00155701
3	11	505-709	0.0177081
3	11	505-709	0.00888655
3	11	505-709	0.00272456
3	11	505-709	0.0116407
3	11	505-709	0.0199978
3	11	505-709	0.00908819
3	11	505-709	0.0179893
3	11	505-709	0.0128436
3	11	505-709	0.0121844
3	11	505-709	0.00937892
3	11	505-709	0.00364724
3	11	505-709	0.0179644
3	11	505-709	0.0112956
3	11	505-709	0.00767573
3	11	505-709	0.00824923
3	11	505-709	0.025913
3	11	505-709	0.0177047
3	11	505-709	0.0105362
3	11	505-709	0.0115197
3	11	505-709	0.0192537
3	11	505-709	0.0142412
3	11	505-709	0.0209393
3	11	505-709	0.0234915
3	11	505-709	0.0117676
3	11	505-709	0.0130033
3	11	505-709	0.0162143
3	11	505-709	0.00650893
3	12	505-709	0.0333834
3	12	505-709	0.0118025
3	12	505-709	0.0249669
3	12	505-709	0.0452231
3	12	505-709	0.0131467
3	12	505-709	0.0243454
3	12	505-709	0.0167155
3	12	505-709	0.0329332
3	12	505-709	0.0292999
3	12	505-709	0.0197742
3	12	505-709	0.0426502
3	12	505-709	0.0476639
3	12	505-709	0.0400266
3	12	505-709	0.0210373
3	12	505-709	0.0288089
3	12	505-709	0.00943509
3	12	505-709	0.0459957
3	12	505-709	0.0326838
3	12	505-709	0.0229516
3	12	505-709	0.0218657
3	12	505-709	0.0199489
3	12	505-709	0.0271978
3	12	505-709	0.0619101
3	12	505-709	0.0153627
3	12	505-709	0.0633845
3	12	505-709	0.0371631
3	12	505-709	0.00205584
3	12	505-709	0.0224776
3	12	505-709	0.0304024
3	12	505-709	0.0317589
3	12	505-709	0.0304811
3	12	505-709	0.0224783
3	12	505-709	0.031611
3	12	505-709	0.0194326
3	12	505-709	0.0300866
3	12	505-709	0.0215758
3	12	505-709	0.0314929
3	12	505-709	0.0297584
3	12	505-709	0.014296
3	12	505-709	0.00864989
3	12	505-709	0.012167
3	12	505-709	0.0267611
3	12	505-709	0.041287
3	12	505-709	0.0357186
3	12	505-709	0.00748063
3	12	505-709	0.0323759
3	12	505-709	0.0238108
3	12	505-709	0.031098
3	12	505-709	0.0266368
3	12	505-709	0.0221594
3	12	505-709	0.0202916
3	12	505-709	0.0233863
3	12	505-709	0.0117954
3	12	505-709	0.00783313
3	12	505-709	0.00240586
3	12	505-709	0.00260968
3	12	505-709	0.00262777
3	12	505-709	0.00117888
3	12	505-709	0.0331319
3	12	505-709	0.0152068
3	12	505-709	0.00454183
3	12	505-709	0.0125593
3	12	505-709	0.0139906
3	13	505-709	0.0107615
3	13	505-709	0.0297668
3	13	505-709	0.0302899
3	13	505-709	0.0275688
3	13	505-709	0.00754794
3	13	505-709	0.0189222
3	13	505-709	0.0108013
3	13	505-709	0.0231408
3	13	505-709	0.00237734
3	13	505-709	0.0146283
3	13	505-709	0.0178088
3	13	505-709	0.0120853
3	13	505-709	0.0198182
3	13	505-709	0.0275662
3	13	505-709	0.0154161
3	13	505-709	0.0167367
3	13	505-709	0.0249244
3	13	505-709	0.013516
3	13	505-709	0.0185667
3	13	505-709	0.0105346
3	13	505-709	0.00212209
3	13	505-709	0.0176683
3	13	505-709	0.0138198
3	13	505-709	0.0166472
3	13	505-709	0.0154263
3	13	505-709	0.0164762
3	13	505-709	0.0213463
3	13	505-709	0.00835848
3	13	505-709	0.00212946
3	13	505-709	0.0174034
3	13	505-709	0.0295129
3	13	505-709	0.0128031
3	13	505-709	0.0493895
3	13	505-709	0.0380409
3	13	505-709	0.0164839
3	13	505-709	0.0361194
3	13	505-709	0.0240878
3	13	505-709	0.0199238
3	13	505-709	0.0172928
3	13	505-709	0.0251561
3	13	505-709	0.0131936
3	13	505-709	0.0197925
3	13	505-709	0.0137166
3	13	505-709	0.022623
3	13	505-709	0.0176135
3	13	505-709	0.00959249
3	13	505-709	0.019092
3	13	505-709	0.0172922
3	13	505-709	0.0198409
3	13	505-709	0.0119923
3	13	505-709	0.0340917
3	13	505-709	0.0124898
3	13	505-709	0.0132451
3	13	505-709	0.00607699
3	13	505-709	0.00763738
3	13	505-709	0.0281173
3	13	505-709	0.0100129
3	13	505-709	0.027157
3	13	505-709	0.0190304
3	13	505-709	0.0152924
3	13	505-709	0.0239443
3	13	505-709	0.0516761
3	13	505-709	0.017467
3	13	505-709	0.0205135
3	13	505-709	0.0116098
3	13	505-709	0.00756722
3	13	505-709	0.0210882
3	13	505-709	0.00812018
3	13	505-709	0.0348198
3	13	505-709	0.0134702
3	14	505-709	0.0472181
3	14	505-709	0.0183013
3	14	505-709	0.0189006
3	14	505-709	0.00362737
3	14	505-709	0.0382918
3	14	505-709	0.0211641
3	14	505-709	0.0198533
3	14	505-709	0.0139442
3	14	505-709	0.032435
3	14	505-709	0.0245797
3	14	505-709	0.0306901
3	14	505-709	0.00923742
3	14	505-709	0.00411644
3	14	505-709	0.0089637
3	14	505-709	0.013002
3	14	505-709	0.0112659
3	14	505-709	0.00529806
3	14	505-709	0.0107584
3	14	505-709	0.00750289
3	14	505-709	0.0151598
3	14	505-709	0.0320992
3	14	505-709	0.0301289
3	14	505-709	0.0268791
3	14	505-709	0.00378186
3	14	505-709	0.0159278
3	14	505-709	0.0172402
3	14	505-709	0.00893056
3	14	505-709	0.0202409
3	14	505-709	0.0277207
3	14	505-709	0.0234002
3	14	505-709	0.0148629
3	14	505-709	0.022997
3	14	505-709	0.0207368
3	14	505-709	0.00201519
3	14	505-709	0.00882517
3	14	505-709	0.0300609
3	14	505-709	0.00609292
3	14	505-709	0.0142004
3	14	505-709	0.00843594
3	14	505-709	0.0175854
3	14	505-709	0.0166699
3	14	505-709	0.0197395
3	14	505-709	0.0162987
3	14	505-709	0.0157981
3	14	505-709	0.0110647
3	14	505-709	0.0214089
3	14	505-709	0.0133431
3	14	505-709	0.0110878
3	14	505-709	0.023401
3	14	505-709	0.00922817
3	14	505-709	0.0186184
3	14	505-709	0.0201843
3	14	505-709	0.00890414
3	14	505-709	0.011982
3	14	505-709	0.0214175
3	14	505-709	0.0163434
3	15	505-709	0.0060223
3	15	505-709	0.0315071
3	15	505-709	0.0169627
3	15	505-709	0.0275382
3	15	505-709	0.014097
3	15	505-709	0.0258602
3	15	505-709	0.0317647
3	15	505-709	0.021343
3	15	505-709	0.0231075
3	15	505-709	0.0228128
3	15	505-709	0.0383181
3	15	505-709	0.0294281
3	15	505-709	0.0188208
3	15	505-709	0.027125
3	15	505-709	0.0107309
3	15	505-709	0.0161672
3	15	505-709	0.00927495
3	15	505-709	0.0164077
3	15	505-709	0.0106337
3	15	505-709	0.0076067
3	15	505-709	0.0278588
3	15	505-709	0.0170501
3	15	505-709	0.0273486
3	15	505-709	0.0344003
3	15	505-709	0.0191656
3	15	505-709	0.0260815
3	15	505-709	0.0211196
3	15	505-709	0.0197804
3	15	505-709	0.0209742
3	15	505-709	0.00367424
3	15	505-709	0.0195314
3	15	505-709	0.0219712
3	15	505-709	0.00351314
3	15	505-709	0.0112228
3	15	505-709	0.011748
3	15	505-709	0.014494
3	15	505-709	0.0116033
3	15	505-709	0.0150035
3	15	505-709	0.0195783
3	15	505-709	0.0203892
3	15	505-709	0.0115573
3	15	505-709	0.0089906
3	15	505-709	0.0189337
3	15	505-709	0.00779018
3	15	505-709	0.0208012
3	15	505-709	0.0147436
3	15	505-709	0.0221626
3	15	505-709	0.018964
3	15	505-709	0.00429849
3	15	505-709	0.0135675
3	15	505-709	0.0131145
3	15	505-709	0.0170202
3	15	505-709	0.0328331
3	15	505-709	0.0144107
3	15	505-709	0.022085
3	15	505-709	0.00993829
3	15	505-709	0.00971965
3	15	505-709	0.0202347
1	16	d505-709	0.00858306
1	16	d505-709	0.0127097
1	16	d505-709	0.00489611
1	16	d505-709	0.00418706
1	16	d505-709	0.00525627
1	16	d505-709	0.00825873
1	16	d505-709	0.00942783
1	16	d505-709	0.00760078
1	16	d505-709	0.00729472
1	16	d505-709	0.0110933
1	16	d505-709	0.0078197
1	16	d505-709	0.0101158
1	16	d505-709	0.0100431
1	16	d505-709	0.0041484
1	16	d505-709	0.00567328
1	16	d505-709	0.00653064
1	16	d505-709	0.00538897
1	16	d505-709	0.00634902
1	16	d505-709	0.00922898
1	16	d505-709	0.010108
1	16	d505-709	0.00600466
1	16	d505-709	0.00461999
1	16	d505-709	0.00452449
1	16	d505-709	0.0108197
1	16	d505-709	0.0129023
1	16	d505-709	0.00645733
1	16	d505-709	0.00480495
1	16	d505-709	0.00487866
1	16	d505-709	0.0151548
1	16	d505-709	0.0126355
1	16	d505-709	0.00536498
1	16	d505-709	0.00574277
1	16	d505-709	0.00584493
1	16	d505-709	0.00313584
1	16	d505-709	0.00440801
1	16	d505-709	0.00545249
1	16	d505-709	0.00237796
1	16	d505-709	0.00647064
1	16	d505-709	0.00171975
1	16	d505-709	0.00491517
1	16	d505-709	0.00508927
1	16	d505-709	0.0066168
1	16	d505-709	0.0052932
1	16	d505-709	0.00641278
1	16	d505-709	0.00807171
1	16	d505-709	0.00654122
1	16	d505-709	0.0299329
1	16	d505-709	0.0231047
1	16	d505-709	0.00861964
1	16	d505-709	0.00349496
1	16	d505-709	0.00886508
1	16	d505-709	0.0113609
1	16	d505-709	0.00536914
1	16	d505-709	0.00541577
1	17	d505-709	0.00255978
1	17	d505-709	0.00263747
1	17	d505-709	0.00207849
1	17	d505-709	0.00198545
1	17	d505-709	0.00386283
1	17	d505-709	0.00212972
1	17	d505-709	0.00168596
1	17	d505-709	0.00141078
1	17	d505-709	0.00154463
1	17	d505-709	0.00150255
1	17	d505-709	0.00131329
1	17	d505-709	0.000598346
1	17	d505-709	0.0028421
1	17	d505-709	0.00142078
1	17	d505-709	0.00165106
1	17	d505-709	0.00181424
1	17	d505-709	0.000774822
1	17	d505-709	0.0012361
1	17	d505-709	0.00073947
1	17	d505-709	0.00113562
1	17	d505-709	0.00248065
1	17	d505-709	0.00270629
1	17	d505-709	0.000400378
1	17	d505-709	0.00101292
1	17	d505-709	0.000712743
1	17	d505-709	0.000999757
1	17	d505-709	0.000773005
1	17	d505-709	0.000557474
1	17	d505-709	0.000852537
1	17	d505-709	0.000594175
1	17	d505-709	0.000989573
1	17	d505-709	0.00227123
1	17	d505-709	0.000847968
1	17	d505-709	0.00191374
1	17	d505-709	0.000621266
1	17	d505-709	0.00302691
1	17	d505-709	0.00134931
1	17	d505-709	0.00131688
1	17	d505-709	0.00188868
1	17	d505-709	0.00100855
1	17	d505-709	0.00205474
1	17	d505-709	0.00142904
1	17	d505-709	0.00104178
1	17	d505-709	0.00511133
1	17	d505-709	0.0016786
1	17	d505-709	0.00154036
1	17	d505-709	0.000845772
1	17	d505-709	0.00157062
1	18	d505-709	0.00758051
1	18	d505-709	0.00876775
1	18	d505-709	0.00770947
1	18	d505-709	0.0059602
1	18	d505-709	0.0107827
1	18	d505-709	0.0103542
1	18	d505-709	0.00944868
1	18	d505-709	0.00806644
1	18	d505-709	0.00607485
1	18	d505-709	0.0138402
1	18	d505-709	0.012381
1	18	d505-709	0.00455921
1	18	d505-709	0.0109655
1	18	d505-709	0.00871112
1	18	d505-709	0.00939118
1	18	d505-709	0.0122482
1	18	d505-709	0.0139189
1	18	d505-709	0.0036402
1	18	d505-709	0.0108942
1	18	d505-709	0.00538366
1	18	d505-709	0.0080553
1	18	d505-709	0.00871047
1	18	d505-709	0.0089332
1	18	d505-709	0.00841431
1	18	d505-709	0.00558247
1	18	d505-709	0.0105523
1	18	d505-709	0.00720956
1	18	d505-709	0.0080327
1	18	d505-709	0.00330194
1	18	d505-709	0.0022816
1	18	d505-709	0.004429
1	18	d505-709	0.00131351
1	18	d505-709	0.005729
1	18	d505-709	0.00486312
1	18	d505-709	0.0052538
1	18	d505-709	0.0100494
1	18	d505-709	0.0175133
1	18	d505-709	0.00429627
1	18	d505-709	0.0125181
1	18	d505-709	0.00679528
1	18	d505-709	0.00552426
1	18	d505-709	0.016571
1	18	d505-709	0.00572085
1	18	d505-709	0.00981963
1	18	d505-709	0.00860781
1	18	d505-709	0.00292724
1	18	d505-709	0.00242273
1	18	d505-709	0.00955654
1	18	d505-709	0.00287001
1	18	d505-709	0.00813168
1	18	d505-709	0.00808721
1	18	d505-709	0.00784957
1	18	d505-709	0.00330202
1	18	d505-709	0.00572969
1	18	d505-709	0.00588299
1	18	d505-709	0.0051378
1	18	d505-709	0.00795021
1	18	d505-709	0.00506386
1	18	d505-709	0.00215488
1	18	d505-709	0.00265524
1	18	d505-709	0.00272852
1	18	d505-709	0.00532651
1	18	d505-709	0.0097065
1	18	d505-709	0.00375052
1	19	d505-709	0.00311413
1	19	d505-709	0.00319625
1	19	d505-709	0.00182026
1	19	d505-709	0.00322884
1	19	d505-709	0.00417839
1	19	d505-709	0.00250174
1	19	d505-709	0.00394045
1	19	d505-709	0.00203206
1	19	d505-709	0.00271774
1	19	d505-709	0.0019558
1	19	d505-709	0.00640784
1	19	d505-709	0.0017802
1	19	d505-709	0.0029189
1	19	d505-709	0.00276854
1	19	d505-709	0.002419
1	19	d505-709	0.00174942
1	19	d505-709	0.00402311
1	19	d505-709	0.00250496
1	19	d505-709	0.00517643
1	19	d505-709	0.00307371
1	19	d505-709	0.00332355
1	19	d505-709	0.00259864
1	19	d505-709	0.00683062
1	19	d505-709	0.00507448
1	19	d505-709	0.00199229
1	19	d505-709	0.00165129
1	19	d505-709	0.0018586
1	19	d505-709	0.00144928
1	19	d505-709	0.00175355
1	19	d505-709	0.0013868
1	19	d505-709	0.00691203
1	19	d505-709	0.00230331
1	19	d505-709	0.00394602
1	19	d505-709	0.00430627
1	19	d505-709	0.00850737
1	19	d505-709	0.00400332
1	19	d505-709	0.00142761
1	19	d505-709	0.00185224
1	19	d505-709	0.00396365
1	19	d505-709	0.00384449
1	19	d505-709	0.00207055
1	19	d505-709	0.00686462
1	19	d505-709	0.00218159
1	19	d505-709	0.00455175
1	19	d505-709	0.00206347
1	19	d505-709	0.00602516
1	19	d505-709	0.00292375
1	19	d505-709	0.00244895
1	19	d505-709	0.00310187
1	20	d505-709	0.00668706
1	20	d505-709	0.00415666
1	20	d505-709	0.00449449
1	20	d505-709	0.00531431
1	20	d505-709	0.00818772
1	20	d505-709	0.00513028
1	20	d505-709	0.00252364
1	20	d505-709	0.00707538
1	20	d505-709	0.00371076
1	20	d505-709	0.012687
1	20	d505-709	0.00838865
1	20	d505-709	0.00220919
1	20	d505-709	0.00339516
1	20	d505-709	0.00851044
1	20	d505-709	0.00631052
1	20	d505-709	0.0132073
1	20	d505-709	0.0073047
1	20	d505-709	0.00772006
1	20	d505-709	0.00318426
1	20	d505-709	0.0124063
1	20	d505-709	0.00433819
1	20	d505-709	0.00373664
1	20	d505-709	0.00805956
1	20	d505-709	0.00844719
1	20	d505-709	0.0108718
1	20	d505-709	0.00964094
1	20	d505-709	0.00713943
1	20	d505-709	0.00709881
1	20	d505-709	0.00972479
1	20	d505-709	0.00170655
1	20	d505-709	0.0109935
1	20	d505-709	0.00740983
1	20	d505-709	0.0099219
1	20	d505-709	0.00341953
1	20	d505-709	0.00746542
1	20	d505-709	0.00998875
1	20	d505-709	0.00252815
1	20	d505-709	0.0175804
1	20	d505-709	0.00558975
1	20	d505-709	0.00613547
1	20	d505-709	0.00842087
1	20	d505-709	0.040508
1	20	d505-709	0.00263518
1	20	d505-709	0.00805418
1	20	d505-709	0.00584957
1	20	d505-709	0.00970169
1	20	d505-709	0.00281086
1	20	d505-709	0.00660787
1	20	d505-709	0.00806287
1	20	d505-709	0.00576577
1	20	d505-709	0.0033523
1	20	d505-709	0.00329434
1	20	d505-709	0.00666265
1	20	d505-709	0.00807489
1	20	d505-709	0.0117766
1	20	d505-709	0.0238159
1	20	d505-709	0.00318931
1	20	d505-709	0.00208304
1	20	d505-709	0.00889605
1	20	d505-709	0.00358981
1	20	d505-709	0.00939808
1	20	d505-709	0.00469142
1	20	d505-709	0.00576834
1	20	d505-709	0.00225831
1	20	d505-709	0.0130465
1	20	d505-709	0.0100256
1	20	d505-709	0.00546241
1	20	d505-709	0.0087716
1	20	d505-709	0.026358
1	20	d505-709	0.00120013
1	20	d505-709	0.00798829
1	20	d505-709	0.00488631
1	20	d505-709	0.00515726
1	20	d505-709	0.0194969
1	20	d505-709	0.00701694
1	20	d505-709	0.00445717
1	20	d505-709	0.00334689
1	20	d505-709	0.00481452
1	20	d505-709	0.00126487
1	20	d505-709	0.00697148
1	20	d505-709	0.00510534
1	20	d505-709	0.0103372
1	20	d505-709	0.00245828
1	20	d505-709	0.00264524
1	20	d505-709	0.00445305
1	20	d505-709	0.00608577
1	20	d505-709	0.00359719
1	20	d505-709	0.00566929
1	20	d505-709	0.00687784
1	20	d505-709	0.00287371
1	20	d505-709	0.0179631
1	20	d505-709	0.00225497
1	20	d505-709	0.00606514
1	20	d505-709	0.00375822
1	20	d505-709	0.00695369
1	20	d505-709	0.00269493
1	20	d505-709	0.00243431
2	21	d505-709	0.00868929
2	21	d505-709	0.0120362
2	21	d505-709	0.00605481
2	21	d505-709	0.00541561
2	21	d505-709	0.00681669
2	21	d505-709	0.0121765
2	21	d505-709	0.011883
2	21	d505-709	0.0083435
2	21	d505-709	0.00546225
2	21	d505-709	0.00836851
2	21	d505-709	0.00645492
2	21	d505-709	0.0188484
2	21	d505-709	0.00681321
2	21	d505-709	0.00570098
2	21	d505-709	0.00659106
2	21	d505-709	0.00345582
2	21	d505-709	0.00982625
2	21	d505-709	0.0104973
2	21	d505-709	0.00508552
2	21	d505-709	0.00724835
2	21	d505-709	0.0139312
2	21	d505-709	0.0052538
2	21	d505-709	0.00526772
2	21	d505-709	0.00719279
2	21	d505-709	0.00722713
2	21	d505-709	0.00464426
2	21	d505-709	0.00729769
2	21	d505-709	0.0127002
2	21	d505-709	0.00521248
2	21	d505-709	0.00322335
2	21	d505-709	0.0061375
2	21	d505-709	0.004557
2	21	d505-709	0.00545304
2	21	d505-709	0.00837744
2	21	d505-709	0.00449577
2	21	d505-709	0.00708854
2	21	d505-709	0.00853422
2	21	d505-709	0.00416533
2	21	d505-709	0.00359981
2	21	d505-709	0.00437459
2	21	d505-709	0.00461519
2	21	d505-709	0.0174595
2	21	d505-709	0.00702974
2	21	d505-709	0.00507594
2	21	d505-709	0.00440004
2	21	d505-709	0.00656304
2	21	d505-709	0.00469906
2	21	d505-709	0.00707361
2	21	d505-709	0.0054242
2	21	d505-709	0.00617567
2	21	d505-709	0.00949938
2	21	d505-709	0.00758755
2	21	d505-709	0.00525405
2	21	d505-709	0.00817755
2	22	d505-709	0.00503635
2	22	d505-709	0.00618339
2	22	d505-709	0.00657561
2	22	d505-709	0.00448137
2	22	d505-709	0.00830456
2	22	d505-709	0.011902
2	22	d505-709	0.00461528
2	22	d505-709	0.00378219
2	22	d505-709	0.0227824
2	22	d505-709	0.00460595
2	22	d505-709	0.0152302
2	22	d505-709	0.00362858
2	22	d505-709	0.00265505
2	22	d505-709	0.00754882
2	22	d505-709	0.0122655
2	22	d505-709	0.00330734
2	22	d505-709	0.00694189
2	22	d505-709	0.00523215
2	22	d505-709	0.00876584
2	22	d505-709	0.00970292
2	22	d505-709	0.0104615
2	22	d505-709	0.00878317
2	22	d505-709	0.00376374
2	22	d505-709	0.00369603
2	22	d505-709	0.00349274
2	22	d505-709	0.0247239
2	22	d505-709	0.0031031
2	22	d505-709	0.0214176
2	22	d505-709	0.00752224
2	22	d505-709	0.00357948
2	22	d505-709	0.00624986
2	22	d505-709	0.00386125
2	22	d505-709	0.0039899
2	22	d505-709	0.00283353
2	22	d505-709	0.00515369
2	22	d505-709	0.00437506
2	22	d505-709	0.00660628
2	22	d505-709	0.00298232
2	22	d505-709	0.00622868
2	22	d505-709	0.00301886
2	22	d505-709	0.00549818
2	22	d505-709	0.00466678
2	22	d505-709	0.00487172
2	22	d505-709	0.00356928
2	22	d505-709	0.00172132
2	22	d505-709	0.00409965
2	22	d505-709	0.00683745
2	22	d505-709	0.00658815
2	22	d505-709	0.00420114
2	22	d505-709	0.00526724
2	22	d505-709	0.00728226
2	22	d505-709	0.00224911
2	22	d505-709	0.00962609
2	22	d505-709	0.00493849
2	22	d505-709	0.00268811
2	22	d505-709	0.0131073
2	22	d505-709	0.0032944
2	22	d505-709	0.00473277
2	22	d505-709	0.00579117
2	22	d505-709	0.00665103
2	22	d505-709	0.0160991
2	22	d505-709	0.00709206
2	22	d505-709	0.00481985
2	22	d505-709	0.0216434
2	22	d505-709	0.0074137
2	22	d505-709	0.00884026
2	22	d505-709	0.00341891
2	23	d505-709	0.00641468
2	23	d505-709	0.0099687
2	23	d505-709	0.00536454
2	23	d505-709	0.00509501
2	23	d505-709	0.0033192
2	23	d505-709	0.00691286
2	23	d505-709	0.00641456
2	23	d505-709	0.00580802
2	23	d505-709	0.00824193
2	23	d505-709	0.0118864
2	23	d505-709	0.00598875
2	23	d505-709	0.00420186
2	23	d505-709	0.00596541
2	23	d505-709	0.00723241
2	23	d505-709	0.00200141
2	23	d505-709	0.000553482
2	23	d505-709	0.00124367
2	23	d505-709	0.0146325
2	23	d505-709	0.00642733
2	23	d505-709	0.00822211
2	23	d505-709	0.00531037
2	23	d505-709	0.0171137
2	23	d505-709	0.00555238
2	23	d505-709	0.00557029
2	23	d505-709	0.0194586
2	23	d505-709	0.00915348
2	23	d505-709	0.003606
2	23	d505-709	0.00465715
2	23	d505-709	0.0131227
2	23	d505-709	0.0171534
2	23	d505-709	0.00306131
2	23	d505-709	0.0118529
2	23	d505-709	0.0121812
2	23	d505-709	0.0252471
2	23	d505-709	0.011886
2	23	d505-709	0.00588037
2	23	d505-709	0.00463189
2	23	d505-709	0.00501486
2	23	d505-709	0.00631562
2	23	d505-709	0.000798276
2	23	d505-709	0.0169349
2	23	d505-709	0.00615571
2	23	d505-709	0.00907785
2	23	d505-709	0.00874878
2	24	d505-709	0.000925108
2	24	d505-709	0.00730062
2	24	d505-709	0.0473063
2	24	d505-709	0.00123046
2	24	d505-709	0.0011707
2	24	d505-709	0.00170929
2	24	d505-709	0.00346761
2	24	d505-709	0.00607425
2	24	d505-709	0.00389444
2	24	d505-709	0.000980479
2	24	d505-709	0.00306385
2	24	d505-709	0.00161446
2	24	d505-709	0.00480033
2	24	d505-709	0.00301209
2	24	d505-709	0.0016072
2	24	d505-709	0.00197018
2	24	d505-709	0.00126377
2	24	d505-709	0.000693953
2	24	d505-709	0.00161355
2	24	d505-709	0.00274145
2	24	d505-709	0.00117527
2	24	d505-709	0.00061113
2	24	d505-709	0.00158878
2	24	d505-709	0.00328633
2	24	d505-709	0.00218135
2	24	d505-709	0.00108818
2	24	d505-709	0.00257683
2	24	d505-709	0.00218805
2	24	d505-709	0.00236204
2	24	d505-709	0.00229281
2	24	d505-709	0.000716172
2	24	d505-709	0.00136141
2	24	d505-709	0.00114593
2	24	d505-709	0.00193192
2	24	d505-709	0.00311223
2	24	d505-709	0.00173441
2	24	d505-709	0.00197287
2	24	d505-709	0.00165118
2	24	d505-709	0.000865784
2	24	d505-709	0.00106177
2	24	d505-709	0.00123294
2	24	d505-709	0.00126988
2	24	d505-709	0.000829774
2	24	d505-709	0.00132263
2	24	d505-709	0.00210782
2	24	d505-709	0.00192353
2	24	d505-709	0.00302895
2	24	d505-709	0.000629042
2	24	d505-709	0.00323213
2	25	d505-709	0.00303691
2	25	d505-709	0.0073378
2	25	d505-709	0.00240597
2	25	d505-709	0.00542244
2	25	d505-709	0.00218628
2	25	d505-709	0.00310891
2	25	d505-709	0.00399952
2	25	d505-709	0.000677987
2	25	d505-709	0.00173159
2	25	d505-709	0.00451788
2	25	d505-709	0.00638648
2	25	d505-709	0.00195026
2	25	d505-709	0.00354124
2	25	d505-709	0.005609
2	25	d505-709	0.00261269
2	25	d505-709	0.00261843
2	25	d505-709	0.00542413
2	25	d505-709	0.00276301
2	25	d505-709	0.00458719
2	25	d505-709	0.0139176
2	25	d505-709	0.0041583
2	25	d505-709	0.00506485
2	25	d505-709	0.00422932
2	25	d505-709	0.00422624
2	25	d505-709	0.0016906
2	25	d505-709	0.00518521
2	25	d505-709	0.00609595
2	25	d505-709	0.00454146
2	25	d505-709	0.00610309
2	25	d505-709	0.00148482
2	25	d505-709	0.00180737
2	25	d505-709	0.00770714
2	25	d505-709	0.00222024
2	25	d505-709	0.0125415
2	25	d505-709	0.00358019
2	25	d505-709	0.00327231
2	25	d505-709	0.0030068
2	25	d505-709	0.00488971
2	25	d505-709	0.00145202
2	25	d505-709	0.00102686
2	25	d505-709	0.00495391
2	25	d505-709	0.00893255
2	25	d505-709	0.0026921
2	25	d505-709	0.00640088
2	25	d505-709	0.0040975
2	25	d505-709	0.00574039
2	25	d505-709	0.00566145
2	25	d505-709	0.00603843
2	25	d505-709	0.00451735
2	25	d505-709	0.00543216
2	25	d505-709	0.00428097
2	25	d505-709	0.00339947
2	25	d505-709	0.00124619
2	25	d505-709	0.00934071
2	25	d505-709	0.0111835
2	25	d505-709	0.00395439
2	25	d505-709	0.00100349
2	25	d505-709	0.00240818
2	25	d505-709	0.00448192
2	25	d505-709	0.00308499
2	25	d505-709	0.00394905
2	25	d505-709	0.00822486
2	25	d505-709	0.00557086
2	25	d505-709	0.0104937
2	25	d505-709	0.00232877
2	25	d505-709	0.00579056
2	25	d505-709	0.000985664
2	25	d505-709	0.00285309
2	25	d505-709	0.00255649
2	25	d505-709	0.00367423
2	25	d505-709	0.00166447
2	25	d505-709	0.00263846
2	25	d505-709	0.00331824
2	25	d505-709	0.0064626
2	25	d505-709	0.00718608
2	25	d505-709	0.00321085
2	25	d505-709	0.00458954
2	25	d505-709	0.00223464
2	25	d505-709	0.00870867
2	25	d505-709	0.00980588
2	25	d505-709	0.0045421
2	25	d505-709	0.00532849
3	26	d505-709	0.004186
3	26	d505-709	0.00359191
3	26	d505-709	0.00314675
3	26	d505-709	0.00182195
3	26	d505-709	0.00372581
3	26	d505-709	0.00270309
3	26	d505-709	0.00320775
3	26	d505-709	0.00236438
3	26	d505-709	0.00264455
3	26	d505-709	0.00545902
3	26	d505-709	0.0019951
3	26	d505-709	0.00269242
3	26	d505-709	0.00446487
3	26	d505-709	0.00157172
3	26	d505-709	0.00145717
3	26	d505-709	0.00237839
3	26	d505-709	0.00369677
3	26	d505-709	0.00495549
3	26	d505-709	0.00152453
3	26	d505-709	0.00423823
3	26	d505-709	0.00726244
3	26	d505-709	0.00277532
3	26	d505-709	0.00449087
3	26	d505-709	0.0018656
3	26	d505-709	0.00198634
3	26	d505-709	0.000818209
3	26	d505-709	0.00142419
3	26	d505-709	0.00483913
3	26	d505-709	0.00563122
3	26	d505-709	0.00279281
3	26	d505-709	0.00369001
3	26	d505-709	0.00148477
3	26	d505-709	0.00380904
3	26	d505-709	0.00277983
3	26	d505-709	0.00263884
3	26	d505-709	0.00360653
3	26	d505-709	0.00352742
3	26	d505-709	0.00383222
3	26	d505-709	0.00212602
3	26	d505-709	0.00299901
3	26	d505-709	0.00100618
3	26	d505-709	0.00193485
3	26	d505-709	0.00335482
3	26	d505-709	0.00307295
3	26	d505-709	0.00203717
3	26	d505-709	0.00202673
3	26	d505-709	0.00248328
3	26	d505-709	0.00156972
3	26	d505-709	0.00214246
3	26	d505-709	0.00292023
3	26	d505-709	0.00422862
3	26	d505-709	0.00393639
3	26	d505-709	0.00320649
3	26	d505-709	0.00152791
3	26	d505-709	0.00262594
3	26	d505-709	0.00252144
3	26	d505-709	0.00331842
3	26	d505-709	0.00235618
3	26	d505-709	0.00163547
3	26	d505-709	0.00217722
3	26	d505-709	0.00281155
3	26	d505-709	0.00246337
3	26	d505-709	0.0042117
3	26	d505-709	0.00292766
3	27	d505-709	0.00258103
3	27	d505-709	0.00432879
3	27	d505-709	0.00516333
3	27	d505-709	0.00279524
3	27	d505-709	0.00385591
3	27	d505-709	0.00459538
3	27	d505-709	0.00488012
3	27	d505-709	0.0057216
3	27	d505-709	0.00593184
3	27	d505-709	0.00157945
3	27	d505-709	0.0021722
3	27	d505-709	0.00256596
3	27	d505-709	0.00274582
3	27	d505-709	0.00444766
3	27	d505-709	0.0052441
3	27	d505-709	0.00252779
3	27	d505-709	0.00345517
3	27	d505-709	0.00248674
3	27	d505-709	0.00560245
3	27	d505-709	0.00495623
3	27	d505-709	0.00372414
3	27	d505-709	0.00501247
3	27	d505-709	0.00103042
3	27	d505-709	0.00221593
3	27	d505-709	0.00249414
3	27	d505-709	0.00215818
3	27	d505-709	0.0046747
3	27	d505-709	0.00383919
3	27	d505-709	0.00297417
3	27	d505-709	0.00131201
3	27	d505-709	0.0026516
3	27	d505-709	0.00227852
3	27	d505-709	0.00257723
3	27	d505-709	0.00248056
3	27	d505-709	0.00297824
3	27	d505-709	0.00256017
3	27	d505-709	0.00508852
3	27	d505-709	0.00226557
3	27	d505-709	0.00258271
3	27	d505-709	0.00131107
3	27	d505-709	0.00234973
3	27	d505-709	0.00120678
3	27	d505-709	0.00199225
3	27	d505-709	0.00323961
3	27	d505-709	0.00324021
3	27	d505-709	0.00429651
3	27	d505-709	0.00122963
3	27	d505-709	0.00209416
3	27	d505-709	0.00366058
3	27	d505-709	0.00148482
3	27	d505-709	0.00182276
3	27	d505-709	0.00115745
3	27	d505-709	0.0031038
3	27	d505-709	0.001702
3	27	d505-709	0.00114789
3	27	d505-709	0.00172929
3	28	d505-709	0.000336777
3	28	d505-709	0.00104528
3	28	d505-709	0.000586092
3	28	d505-709	0.00119413
3	28	d505-709	0.000776896
3	28	d505-709	0.00123013
3	28	d505-709	0.000694726
3	28	d505-709	0.000670574
3	28	d505-709	0.000834249
3	28	d505-709	0.000650269
3	28	d505-709	0.000909989
3	28	d505-709	0.000636867
3	28	d505-709	0.00123074
3	28	d505-709	0.00061686
3	28	d505-709	0.000390804
3	28	d505-709	0.000230883
3	28	d505-709	0.000850327
3	28	d505-709	0.00113435
3	28	d505-709	0.000678019
3	28	d505-709	0.000830354
3	28	d505-709	0.000474325
3	28	d505-709	0.00116308
3	28	d505-709	0.00155471
3	28	d505-709	0.000877081
3	28	d505-709	0.000191618
3	28	d505-709	0.000666858
3	28	d505-709	0.000130249
3	28	d505-709	0.00100072
3	28	d505-709	0.000510613
3	28	d505-709	0.00125451
3	28	d505-709	0.00109288
3	28	d505-709	0.000556274
3	28	d505-709	0.000106679
3	28	d505-709	0.00104609
3	28	d505-709	0.00132367
3	28	d505-709	0.00112083
3	28	d505-709	0.00115994
3	28	d505-709	0.000614444
3	28	d505-709	0.000625948
3	28	d505-709	0.000291018
3	28	d505-709	0.000509829
3	28	d505-709	0.00069386
3	28	d505-709	0.000978455
3	28	d505-709	0.000537024
3	28	d505-709	0.00089922
3	28	d505-709	0.000269466
3	28	d505-709	0.000618016
3	28	d505-709	0.000624937
3	28	d505-709	0.000304809
3	28	d505-709	0.000167317
3	28	d505-709	0.000314221
3	28	d505-709	0.000970947
3	28	d505-709	9.06791e-05
3	28	d505-709	0.000799893
3	29	d505-709	0.00376067
3	29	d505-709	0.00280307
3	29	d505-709	0.00271856
3	29	d505-709	0.00248562
3	29	d505-709	0.00384366
3	29	d505-709	0.00196098
3	29	d505-709	0.00303593
3	29	d505-709	0.00294957
3	29	d505-709	0.00210267
3	29	d505-709	0.00358129
3	29	d505-709	0.00266089
3	29	d505-709	0.001984
3	29	d505-709	0.0015738
3	29	d505-709	0.000898393
3	29	d505-709	0.00422044
3	29	d505-709	0.00277597
3	29	d505-709	0.000650693
3	29	d505-709	0.00322391
3	29	d505-709	0.00358703
3	29	d505-709	0.0023069
3	29	d505-709	0.00334397
3	29	d505-709	0.000716602
3	29	d505-709	0.00140053
3	29	d505-709	0.00241433
3	29	d505-709	0.00196946
3	29	d505-709	0.00146519
3	29	d505-709	0.00261095
3	29	d505-709	0.00211476
3	29	d505-709	0.00168779
3	29	d505-709	0.00191507
3	29	d505-709	0.00283614
3	29	d505-709	0.00218861
3	29	d505-709	0.00728601
3	29	d505-709	0.00382573
3	29	d505-709	0.00308629
3	29	d505-709	0.0076418
3	29	d505-709	0.00453691
3	29	d505-709	0.00299565
3	29	d505-709	0.00345697
3	29	d505-709	0.00527974
3	29	d505-709	0.00367003
3	29	d505-709	0.000829804
3	29	d505-709	0.000975959
3	29	d505-709	0.00277821
3	29	d505-709	0.000942739
3	29	d505-709	0.0038617
3	29	d505-709	0.0047515
3	29	d505-709	0.00280989
3	29	d505-709	0.0031254
3	29	d505-709	0.00168678
3	29	d505-709	0.00490233
3	29	d505-709	0.00488655
3	29	d505-709	0.00683522
3	29	d505-709	0.00376633
3	29	d505-709	0.00436342
3	29	d505-709	0.00187061
3	29	d505-709	0.00338157
3	29	d505-709	0.00316198
3	29	d505-709	0.00364476
3	29	d505-709	0.00170829
3	29	d505-709	0.00226238
3	29	d505-709	0.00395537
3	29	d505-709	0.00203487
3	29	d505-709	0.00259852
3	29	d505-709	0.00323169
3	29	d505-709	0.00242888
3	29	d505-709	0.00220937
3	29	d505-709	0.00230675
3	29	d505-709	0.00324051
3	29	d505-709	0.00378333
3	29	d505-709	0.00304431
3	29	d505-709	0.00108575
3	29	d505-709	0.000897423
3	29	d505-709	0.000412174
3	29	d505-709	0.00124241
3	29	d505-709	0.00228684
3	30	d505-709	0.00295483
3	30	d505-709	0.001704
3	30	d505-709	0.00186752
3	30	d505-709	0.00179424
3	30	d505-709	0.00127069
3	30	d505-709	0.00180188
3	30	d505-709	0.00119751
3	30	d505-709	0.00199674
3	30	d505-709	0.00339089
3	30	d505-709	0.00114188
3	30	d505-709	0.00246117
3	30	d505-709	0.00342602
3	30	d505-709	0.00299436
3	30	d505-709	0.00320673
3	30	d505-709	0.00207622
3	30	d505-709	0.00116797
3	30	d505-709	0.00328361
3	30	d505-709	0.00334783
3	30	d505-709	0.00412543
3	30	d505-709	0.00077807
3	30	d505-709	0.00225337
3	30	d505-709	0.00135908
3	30	d505-709	0.00300744
3	30	d505-709	0.00241757
3	30	d505-709	0.00287087
3	30	d505-709	0.00199498
3	30	d505-709	0.00481891
3	30	d505-709	0.00360877
3	30	d505-709	0.00465647
3	30	d505-709	0.00172913
3	30	d505-709	0.00238312
3	30	d505-709	0.00194564
3	30	d505-709	0.00363477
3	30	d505-709	0.00244157
3	30	d505-709	0.00140334
3	30	d505-709	0.00259266
3	30	d505-709	0.00221212
3	30	d505-709	0.00137016
3	30	d505-709	0.00342928
3	30	d505-709	0.00286751
3	30	d505-709	0.0020261
3	30	d505-709	0.00198594
3	30	d505-709	0.0011185
3	30	d505-709	0.00288343
3	30	d505-709	0.00315224
3	30	d505-709	0.00133696
3	30	d505-709	0.00383543
3	30	d505-709	0.00145461
3	30	d505-709	0.00157504
3	30	d505-709	0.00300757
3	30	d505-709	0.00302858
3	30	d505-709	0.00155811
3	30	d505-709	0.00119334
[truncated: 1,266 more rows]

## Sheet: SuppFigure7_1E
Replicate	Image	Object	TRIM37 rescue construct	Total Intensity, FLAG channel		Replicate	Image	Object	TRIM37 rescue construct	Total Intensity, TRIM37 channel
1	1	1	505-709	0.213687		1	31	1	FBT37	0.407431
1	1	2	505-709	0.875059		1	31	2	FBT37	6.54617
1	1	3	505-709	0.183215		1	31	3	FBT37	7.09824
1	1	4	505-709	0.0925612		1	31	4	FBT37	5.66088
1	1	5	505-709	0.903014		1	31	5	FBT37	5.43886
1	1	6	505-709	0.188128		1	31	6	FBT37	13.9349
1	1	7	505-709	0.313893		1	31	7	FBT37	7.88458
1	1	8	505-709	0.367971		1	31	8	FBT37	7.47457
1	1	9	505-709	0.67863		1	31	9	FBT37	4.60049
1	1	10	505-709	0.815595		1	32	1	FBT37	5.63893
1	2	1	505-709	0.642176		1	32	2	FBT37	0.718898
1	2	2	505-709	1.24332		1	32	3	FBT37	4.96208
1	2	3	505-709	1.09033		1	32	4	FBT37	7.44138
1	2	4	505-709	0.334829		1	32	5	FBT37	9.71098
1	2	5	505-709	1.05376		1	32	6	FBT37	7.06531
1	2	6	505-709	0.710109		1	32	7	FBT37	11.7808
1	2	7	505-709	1.90544		1	32	8	FBT37	2.42846
1	2	8	505-709	1.01524		1	32	9	FBT37	8.07279
1	2	9	505-709	0.526909		1	32	10	FBT37	7.38587
1	3	1	505-709	1.26723		1	32	11	FBT37	11.8949
1	3	2	505-709	2.98697		1	33	1	FBT37	4.79741
1	3	3	505-709	3.89093		1	33	2	FBT37	2.52802
1	3	4	505-709	2.23377		1	33	3	FBT37	2.05966
1	3	5	505-709	1.03526		1	33	4	FBT37	4.47131
1	3	6	505-709	1.2574		1	33	5	FBT37	2.85461
1	3	7	505-709	1.30665		1	33	6	FBT37	3.12696
1	3	8	505-709	2.19863		1	33	7	FBT37	1.576
1	4	1	505-709	0.674693		1	33	8	FBT37	1.96201
1	4	2	505-709	0.700877		1	33	9	FBT37	0.769741
1	4	3	505-709	0.972763		1	33	10	FBT37	2.17433
1	4	4	505-709	0.396155		1	33	11	FBT37	2.29831
1	4	5	505-709	1.36587		1	33	12	FBT37	6.25844
1	4	6	505-709	1.39297		1	33	13	FBT37	3.93175
1	4	7	505-709	1.08919		1	34	1	FBT37	8.5892
1	4	8	505-709	0.349599		1	34	2	FBT37	10.6247
1	4	9	505-709	0.685573		1	34	3	FBT37	9.03609
1	5	1	505-709	0.842679		1	34	4	FBT37	6.28153
1	5	2	505-709	0.737682		1	34	5	FBT37	14.0106
1	5	3	505-709	0.4448		1	34	6	FBT37	7.66947
1	5	4	505-709	0.702007		1	34	7	FBT37	5.16509
1	5	5	505-709	0.332403		1	34	8	FBT37	3.13771
1	5	6	505-709	0.0281834		1	35	1	FBT37	4.10571
1	5	7	505-709	6.46833		1	35	2	FBT37	13.0041
1	5	8	505-709	0.608255		1	35	3	FBT37	7.46509
1	6	1	505-709	0.673289		1	35	4	FBT37	5.37786
1	6	2	505-709	1.24883		1	35	5	FBT37	8.86265
1	6	3	505-709	2.8954		1	35	6	FBT37	6.2031
1	6	4	505-709	1.53458		1	35	7	FBT37	8.77711
1	6	5	505-709	3.10338		1	36	1	FBT37	3.19881
1	6	6	505-709	0.578088		1	36	2	FBT37	1.86496
1	6	7	505-709	4.05838		1	36	3	FBT37	2.89235
1	6	8	505-709	1.84138		1	36	4	FBT37	4.51325
1	6	9	505-709	0.805371		1	36	5	FBT37	1.85194
1	6	10	505-709	1.59095		1	36	6	FBT37	2.03157
1	6	11	505-709	1.13381		1	36	7	FBT37	2.47097
1	7	1	505-709	0.253941		1	36	8	FBT37	2.23703
1	7	2	505-709	0.743999		1	36	9	FBT37	1.85492
1	7	3	505-709	1.7677		1	36	10	FBT37	7.20827
1	7	4	505-709	1.23249		1	36	11	FBT37	1.7818
1	7	5	505-709	1.07976		1	36	12	FBT37	1.61877
1	7	6	505-709	0.397253		1	37	1	FBT37	8.09287
1	7	7	505-709	0.478767		1	37	2	FBT37	11.7954
1	7	8	505-709	0.320821		1	37	3	FBT37	13.4196
1	7	9	505-709	0.482704		1	37	4	FBT37	21.489
1	8	1	505-709	0.909667		1	37	5	FBT37	3.32975
1	8	2	505-709	1.16332		1	37	6	FBT37	4.88429
1	8	3	505-709	0.474449		1	37	7	FBT37	5.28377
1	8	4	505-709	1.35198		1	37	8	FBT37	2.84652
1	8	5	505-709	0.464347		1	37	9	FBT37	1.27118
1	8	6	505-709	0.410163		1	37	10	FBT37	6.29776
1	8	7	505-709	0.813092		1	37	11	FBT37	6.13066
1	9	1	505-709	1.77926		1	37	12	FBT37	5.34626
1	9	2	505-709	0.766735		1	37	13	FBT37	26.8451
1	9	3	505-709	10.1787		1	38	1	FBT37	7.88418
1	9	4	505-709	1.56219		1	38	2	FBT37	7.56553
1	9	5	505-709	1.41021		1	38	3	FBT37	3.71597
1	9	6	505-709	0.625086		1	38	4	FBT37	4.08031
1	10	1	505-709	1.11775		1	38	5	FBT37	11.7713
1	10	2	505-709	1.68655		1	38	6	FBT37	15.2912
1	10	3	505-709	1.06957		1	38	7	FBT37	4.9299
1	10	4	505-709	2.31615		1	38	8	FBT37	5.30619
1	10	5	505-709	1.1194		1	39	1	FBT37	5.74267
1	10	6	505-709	1.6065		1	39	2	FBT37	7.10857
1	10	7	505-709	1.00902		1	39	3	FBT37	7.1834
2	11	1	505-709	0.296406		1	39	4	FBT37	10.4264
2	11	2	505-709	0.845747		1	39	5	FBT37	0.808331
2	11	3	505-709	1.06906		1	39	6	FBT37	8.40014
2	11	4	505-709	0.839994		1	39	7	FBT37	6.82048
2	11	5	505-709	0.655558		1	39	8	FBT37	4.45052
2	11	6	505-709	0.633722		1	40	1	FBT37	7.04395
2	11	7	505-709	0.763943		1	40	2	FBT37	10.1672
2	11	8	505-709	0.305623		1	40	3	FBT37	5.82544
2	11	9	505-709	0.447196		1	40	4	FBT37	5.23096
2	11	10	505-709	0.609964		1	40	5	FBT37	10.9524
2	12	1	505-709	1.11234		1	40	6	FBT37	4.742
2	12	2	505-709	1.21044		1	40	7	FBT37	5.83134
2	12	3	505-709	0.492927		1	40	8	FBT37	9.95114
2	12	4	505-709	0.700755		1	40	9	FBT37	6.60676
2	12	5	505-709	1.28627		2	41	1	FBT37	6.43612
2	12	6	505-709	0.64097		2	41	2	FBT37	1.97249
2	12	7	505-709	0.662409		2	41	3	FBT37	2.68125
2	12	8	505-709	1.8621		2	41	4	FBT37	2.52238
2	12	9	505-709	1.23235		2	41	5	FBT37	5.4987
2	13	1	505-709	0.156435		2	41	6	FBT37	5.29364
2	13	2	505-709	0.735668		2	41	7	FBT37	3.02469
2	13	3	505-709	1.74617		2	41	8	FBT37	4.15821
2	13	4	505-709	0.517052		2	41	9	FBT37	4.15709
2	13	5	505-709	1.17101		2	41	10	FBT37	2.93533
2	13	6	505-709	0.994217		2	42	1	FBT37	7.20227
2	13	7	505-709	0.578393		2	42	2	FBT37	4.12517
2	14	1	505-709	1.0647		2	42	3	FBT37	10.1395
2	14	2	505-709	0.756374		2	42	4	FBT37	11.3609
2	14	3	505-709	0.247913		2	42	5	FBT37	4.32645
2	14	4	505-709	0.783719		2	42	6	FBT37	5.66278
2	14	5	505-709	0.905241		2	42	7	FBT37	4.86166
2	14	6	505-709	0.538079		2	42	8	FBT37	1.48534
2	15	1	505-709	2.52891		2	43	1	FBT37	5.36959
2	15	2	505-709	1.32746		2	43	2	FBT37	5.84089
2	15	3	505-709	3.03592		2	43	3	FBT37	7.96574
2	15	4	505-709	2.11135		2	43	4	FBT37	11.3069
2	15	5	505-709	2.61508		2	43	5	FBT37	24.3061
2	15	6	505-709	2.87985		2	43	6	FBT37	4.34224
2	15	7	505-709	0.842634		2	43	7	FBT37	20.2855
2	15	8	505-709	0.99942		2	43	8	FBT37	5.68815
2	15	9	505-709	0.729152		2	43	9	FBT37	17.7038
2	16	1	505-709	3.24381		2	44	1	FBT37	7.46151
2	16	2	505-709	3.66989		2	44	2	FBT37	5.30752
2	16	3	505-709	2.67259		2	44	3	FBT37	4.63656
2	16	4	505-709	1.39136		2	44	4	FBT37	6.76342
2	16	5	505-709	1.39316		2	44	5	FBT37	12.6538
2	16	6	505-709	3.08843		2	44	6	FBT37	6.57656
2	16	7	505-709	1.0851		2	44	7	FBT37	5.82597
2	17	1	505-709	0.562783		2	44	8	FBT37	10.1104
2	17	2	505-709	1.81207		2	44	9	FBT37	6.79023
2	17	3	505-709	0.641581		2	44	10	FBT37	7.50721
2	17	4	505-709	0.648829		2	44	11	FBT37	3.98444
2	17	5	505-709	1.03455		2	45	1	FBT37	8.20575
2	17	6	505-709	0.360143		2	45	2	FBT37	0.671931
2	17	7	505-709	0.506859		2	45	3	FBT37	8.28229
2	17	8	505-709	1.116		2	45	4	FBT37	6.40282
2	17	9	505-709	0.294835		2	45	5	FBT37	5.58973
2	18	1	505-709	0.966522		2	45	6	FBT37	9.91623
2	18	2	505-709	2.66142		2	45	7	FBT37	5.70636
2	18	3	505-709	0.61828		2	45	8	FBT37	7.08707
2	18	4	505-709	2.87947		2	45	9	FBT37	10.2665
2	18	5	505-709	3.30529		2	46	1	FBT37	4.71469
2	18	6	505-709	3.83131		2	46	2	FBT37	3.90674
2	18	7	505-709	1.00923		2	46	3	FBT37	7.08191
2	18	8	505-709	0.543435		2	46	4	FBT37	3.24404
2	18	9	505-709	0.889784		2	46	5	FBT37	7.45388
2	18	10	505-709	1.48746		2	46	6	FBT37	7.31977
2	19	1	505-709	0.809995		2	46	7	FBT37	3.71348
2	19	2	505-709	0.796887		2	46	8	FBT37	5.12262
2	19	3	505-709	0.936904		2	46	9	FBT37	3.97115
2	19	4	505-709	0.458747		2	46	10	FBT37	4.69744
2	19	5	505-709	0.549645		2	46	11	FBT37	6.13126
2	19	6	505-709	0.290745		2	47	1	FBT37	4.87233
2	19	7	505-709	0.728542		2	47	2	FBT37	5.68792
2	19	8	505-709	1.0269		2	47	3	FBT37	9.4878
2	19	9	505-709	0.781903		2	47	4	FBT37	4.82945
2	20	1	505-709	0.567483		2	47	5	FBT37	9.77388
2	20	2	505-709	1.14592		2	47	6	FBT37	5.05997
2	20	3	505-709	1.92313		2	47	7	FBT37	7.6092
2	20	4	505-709	1.46011		2	47	8	FBT37	4.98573
2	20	5	505-709	3.35418		2	47	9	FBT37	3.91266
2	20	6	505-709	0.903121		2	48	1	FBT37	9.47451
2	20	7	505-709	0.442191		2	48	2	FBT37	6.00583
2	20	8	505-709	1.84303		2	48	3	FBT37	4.66377
2	20	9	505-709	2.20557		2	48	4	FBT37	4.72789
2	20	10	505-709	1.72659		2	48	5	FBT37	8.15041
2	20	11	505-709	1.40403		2	48	6	FBT37	0.261006
2	20	12	505-709	3.65568		2	48	7	FBT37	5.94128
3	21	1	505-709	0.813733		2	48	8	FBT37	5.19442
3	21	2	505-709	0.369253		2	48	9	FBT37	0.934554
3	21	3	505-709	0.7673		2	48	10	FBT37	10.9326
3	21	4	505-709	0.852659		2	48	11	FBT37	5.38308
3	21	5	505-709	0.558358		2	49	1	FBT37	2.92122
3	21	6	505-709	0.382071		2	49	2	FBT37	0.0191043
3	21	7	505-709	0.429816		2	49	3	FBT37	4.59513
3	21	8	505-709	0.264118		2	49	4	FBT37	10.048
3	22	1	505-709	0.41413		2	49	5	FBT37	7.54809
3	22	2	505-709	0.820569		2	49	6	FBT37	9.94884
3	22	3	505-709	0.441459		2	49	7	FBT37	10.0422
3	22	4	505-709	0.637278		2	49	8	FBT37	9.12961
3	22	5	505-709	1.85223		2	49	9	FBT37	8.08846
3	22	6	505-709	1.04257		2	49	10	FBT37	5.14957
3	22	7	505-709	0.986526		2	50	1	FBT37	0
3	22	8	505-709	0.951797		2	50	2	FBT37	5.60261
3	23	1	505-709	0.596811		2	50	3	FBT37	7.4061
3	23	2	505-709	1.168		2	50	4	FBT37	5.61724
3	23	3	505-709	0.557977		2	50	5	FBT37	6.09339
3	23	4	505-709	0.793454		2	50	6	FBT37	12.2422
3	23	5	505-709	1.99477		2	50	7	FBT37	6.5001
3	23	6	505-709	0.934737		2	50	8	FBT37	10.4647
3	23	7	505-709	1.0987		2	50	9	FBT37	7.48035
3	23	8	505-709	0.850813		2	50	10	FBT37	10.1141
3	24	1	505-709	2.05066		2	50	11	FBT37	9.64089
3	24	2	505-709	0.243473		3	51	1	FBT37	4.85154
3	24	3	505-709	1.31263		3	51	2	FBT37	7.17002
3	24	4	505-709	1.72279		3	51	3	FBT37	1.0112
3	24	5	505-709	1.00513		3	51	4	FBT37	7.29802
3	24	6	505-709	1.52526		3	51	5	FBT37	6.86329
3	24	7	505-709	1.17311		3	51	6	FBT37	5.42333
3	24	8	505-709	0.285191		3	51	7	FBT37	3.55457
3	25	1	505-709	0.798215		3	51	8	FBT37	5.29139
3	25	2	505-709	0.241306		3	51	9	FBT37	9.32708
3	25	3	505-709	0.68426		3	51	10	FBT37	5.2957
3	25	4	505-709	1.26267		3	51	11	FBT37	3.50573
3	25	5	505-709	0.794934		3	52	1	FBT37	0.0433661
3	25	6	505-709	1.22864		3	52	2	FBT37	7.07562
3	25	7	505-709	1.19097		3	52	3	FBT37	8.0332
3	25	8	505-709	0.795377		3	52	4	FBT37	2.83178
3	26	1	505-709	0.941909		3	52	5	FBT37	4.45318
3	26	2	505-709	1.6043		3	52	6	FBT37	9.88231
3	26	3	505-709	1.97905		3	52	7	FBT37	5.22803
3	26	4	505-709	4.30043		3	52	8	FBT37	6.62965
3	26	5	505-709	0.667185		3	52	9	FBT37	6.65357
3	26	6	505-709	1.29525		3	52	10	FBT37	6.07872
3	26	7	505-709	2.32125		3	52	11	FBT37	6.42966
3	26	8	505-709	2.25394		3	52	12	FBT37	4.72799
3	26	9	505-709	0.972564		3	53	1	FBT37	4.85089
3	27	1	505-709	1.04662		3	53	2	FBT37	3.62994
3	27	2	505-709	1.30837		3	53	3	FBT37	22.7496
3	27	3	505-709	2.64161		3	53	4	FBT37	8.28594
3	27	4	505-709	0.656809		3	53	5	FBT37	0.784939
3	27	5	505-709	0.695369		3	53	6	FBT37	3.30001
3	27	6	505-709	0.648936		3	53	7	FBT37	7.39527
3	27	7	505-709	1.03937		3	53	8	FBT37	3.16324
3	27	8	505-709	0.533822		3	53	9	FBT37	5.22649
3	27	9	505-709	0.810956		3	53	10	FBT37	3.71672
3	27	10	505-709	0.227543		3	53	11	FBT37	3.10471
3	27	11	505-709	0.36141		3	53	12	FBT37	3.98479
3	28	1	505-709	0.96144		3	54	1	FBT37	3.10431
3	28	2	505-709	0.559884		3	54	2	FBT37	18.8295
3	28	3	505-709	0.324636		3	54	3	FBT37	6.79399
3	28	4	505-709	0.280644		3	54	4	FBT37	20.6937
3	28	5	505-709	0.290684		3	54	5	FBT37	5.55615
3	28	6	505-709	0.599802		3	54	6	FBT37	9.56757
3	28	7	505-709	0.408621		3	54	7	FBT37	7.11252
3	28	8	505-709	0.67422		3	54	8	FBT37	6.62144
3	29	1	505-709	1.17948		3	54	9	FBT37	5.76599
3	29	2	505-709	0.997681		3	54	10	FBT37	8.23948
3	29	3	505-709	1.1247		3	54	11	FBT37	1.86685
3	29	4	505-709	0.877394		3	55	1	FBT37	7.0836
3	30	1	505-709	1.06126		3	55	2	FBT37	9.26702
3	30	2	505-709	1.4173		3	55	3	FBT37	3.84599
3	30	3	505-709	0.944533		3	55	4	FBT37	10.575
3	30	4	505-709	0.360204		3	55	5	FBT37	4.02763
3	30	5	505-709	0.571923		3	55	6	FBT37	7.78497
3	30	6	505-709	1.02248		3	55	7	FBT37	4.20911
3	30	7	505-709	0.852598		3	55	8	FBT37	7.44349
3	30	8	505-709	0.236347		3	55	9	FBT37	2.65916
3	30	9	505-709	0.302251		3	55	10	FBT37	3.18207
3	30	10	505-709	0.547478		3	55	11	FBT37	4.69427
3	30	11	505-709	1.5151		3	55	12	FBT37	5.76857
3	30	12	505-709	0.797848		3	56	1	FBT37	1.07456
3	30	13	505-709	1.45048		3	56	2	FBT37	4.62461
3	30	14	505-709	0.585611		3	56	3	FBT37	5.72854
3	30	15	505-709	0.756268		3	56	4	FBT37	0.527413
1	31	1	FLAG-BirA	2.32799		3	56	5	FBT37	6.23409
1	31	2	FLAG-BirA	2.47242		3	56	6	FBT37	7.22379
1	31	3	FLAG-BirA	1.68447		3	56	7	FBT37	2.2732
1	31	4	FLAG-BirA	1.75741		3	56	8	FBT37	2.52724
1	31	5	FLAG-BirA	1.07988		3	56	9	FBT37	0.805264
1	31	6	FLAG-BirA	1.5452		3	56	10	FBT37	5.73593
1	31	7	FLAG-BirA	2.61645		3	56	11	FBT37	5.95634
1	31	8	FLAG-BirA	1.23569		3	57	1	FBT37	4.05644
1	31	9	FLAG-BirA	2.57845		3	57	2	FBT37	2.79176
1	31	10	FLAG-BirA	1.26575		3	57	3	FBT37	3.0847
1	31	11	FLAG-BirA	1.65893		3	57	4	FBT37	1.13433
1	31	12	FLAG-BirA	0.955596		3	57	5	FBT37	3.21166
1	31	13	FLAG-BirA	1.46122		3	57	6	FBT37	0.857801
1	31	14	FLAG-BirA	1.24683		3	57	7	FBT37	0.194598
1	32	1	FLAG-BirA	2.99742		3	57	8	FBT37	3.09378
1	32	2	FLAG-BirA	4.29517		3	57	9	FBT37	1.92851
1	32	3	FLAG-BirA	1.55836		3	57	10	FBT37	2.24048
1	32	4	FLAG-BirA	2.22373		3	58	1	FBT37	7.68167
1	32	5	FLAG-BirA	2.91238		3	58	2	FBT37	4.47117
1	32	6	FLAG-BirA	2.84622		3	58	3	FBT37	3.77702
1	32	7	FLAG-BirA	1.01093		3	58	4	FBT37	4.08997
1	32	8	FLAG-BirA	4.3834		3	58	5	FBT37	3.57082
1	33	1	FLAG-BirA	0.964721		3	58	6	FBT37	11.5512
1	33	2	FLAG-BirA	1.30106		3	58	7	FBT37	2.55346
1	33	3	FLAG-BirA	4.07208		3	58	8	FBT37	13.9889
1	33	4	FLAG-BirA	4.42742		3	58	9	FBT37	3.03377
1	33	5	FLAG-BirA	1.55302		3	58	10	FBT37	4.31078
1	33	6	FLAG-BirA	0.656825		3	59	1	FBT37	6.06505
1	33	7	FLAG-BirA	2.3378		3	59	2	FBT37	8.46064
1	33	8	FLAG-BirA	1.66323		3	59	3	FBT37	9.90541
1	33	9	FLAG-BirA	4.01096		3	59	4	FBT37	6.78431
1	33	10	FLAG-BirA	1.31788		3	59	5	FBT37	9.59261
1	33	11	FLAG-BirA	0.425391		3	59	6	FBT37	8.30622
1	33	12	FLAG-BirA	1.50555		3	59	7	FBT37	5.13971
1	33	13	FLAG-BirA	1.17002		3	59	8	FBT37	4.83101
1	34	1	FLAG-BirA	1.71852		3	59	9	FBT37	4.25232
1	34	2	FLAG-BirA	2.37691		3	60	1	FBT37	2.60694
1	34	3	FLAG-BirA	1.25382		3	60	2	FBT37	4.52293
1	34	4	FLAG-BirA	2.09081		3	60	3	FBT37	3.2647
1	34	5	FLAG-BirA	1.27793		3	60	4	FBT37	3.26262
1	34	6	FLAG-BirA	1.389		3	60	5	FBT37	3.19629
1	34	7	FLAG-BirA	1.12612		3	60	6	FBT37	11.924
1	34	8	FLAG-BirA	3.05212		3	60	7	FBT37	2.39023
1	34	9	FLAG-BirA	0.599924		3	60	8	FBT37	12.862
1	35	1	FLAG-BirA	1.83505		3	60	9	FBT37	5.63755
1	35	2	FLAG-BirA	3.10166		3	60	10	FBT37	4.85389
1	35	3	FLAG-BirA	3.45559		3	60	11	FBT37	2.55492
1	35	4	FLAG-BirA	2.83117		3	60	12	FBT37	2.49363
1	35	5	FLAG-BirA	5.76748		1	61	1	FB	0.536019
1	35	6	FLAG-BirA	2.95547		1	61	2	FB	0.300465
1	35	7	FLAG-BirA	4.94382		1	61	3	FB	0.201602
1	35	8	FLAG-BirA	4.58405		1	61	4	FB	0.321965
1	36	1	FLAG-BirA	1.564		1	61	5	FB	0.175769
1	36	2	FLAG-BirA	3.32691		1	61	6	FB	0.517372
1	36	3	FLAG-BirA	0.672679		1	61	7	FB	0.411719
1	36	4	FLAG-BirA	3.32935		1	61	8	FB	0.198138
1	36	5	FLAG-BirA	3.72731		1	61	9	FB	0.463783
1	36	6	FLAG-BirA	1.95793		1	61	10	FB	0.387472
1	36	7	FLAG-BirA	2.83395		1	61	11	FB	0.31902
1	36	8	FLAG-BirA	5.54235		1	61	12	FB	0.718166
1	36	9	FLAG-BirA	2.63221		1	61	13	FB	0.170947
1	36	10	FLAG-BirA	2.16876		1	61	14	FB	0.627512
1	36	11	FLAG-BirA	2.54128		1	61	15	FB	0.30103
1	36	12	FLAG-BirA	3.70517		1	62	1	FB	0.435889
1	36	13	FLAG-BirA	6.0009		1	62	2	FB	0.369482
1	36	14	FLAG-BirA	0.111559		1	62	3	FB	0.0235599
1	36	15	FLAG-BirA	0.698695		1	62	4	FB	0.340642
1	37	1	FLAG-BirA	1.80589		1	62	5	FB	0.605875
1	37	2	FLAG-BirA	1.05275		1	62	6	FB	0.124025
1	37	3	FLAG-BirA	0.344976		1	62	7	FB	0.383307
1	37	4	FLAG-BirA	0.617609		1	62	8	FB	0.621057
1	37	5	FLAG-BirA	1.51899		1	62	9	FB	0.211933
1	37	6	FLAG-BirA	0.711681		1	62	10	FB	0.527733
1	37	7	FLAG-BirA	0.525505		1	62	11	FB	0.164202
1	37	8	FLAG-BirA	1.24973		1	63	1	FB	0.182376
1	37	9	FLAG-BirA	0.277058		1	63	2	FB	0.316335
1	37	10	FLAG-BirA	1.18166		1	63	3	FB	0.437858
1	38	1	FLAG-BirA	1.78495		1	63	4	FB	0.256489
1	38	2	FLAG-BirA	2.05126		1	63	5	FB	0.238682
1	38	3	FLAG-BirA	4.57833		1	63	6	FB	0.589029
1	38	4	FLAG-BirA	2.60546		1	63	7	FB	0.179217
1	38	5	FLAG-BirA	3.17661		1	63	8	FB	0.606012
1	38	6	FLAG-BirA	2.64614		1	63	9	FB	0.388434
1	38	7	FLAG-BirA	3.787		1	63	10	FB	0.276692
1	38	8	FLAG-BirA	3.28717		1	63	11	FB	0.279789
1	38	9	FLAG-BirA	1.63169		1	63	12	FB	0.334051
1	38	10	FLAG-BirA	0.992309		1	63	13	FB	0.365103
1	39	1	FLAG-BirA	3.73994		1	63	14	FB	0.368032
1	39	2	FLAG-BirA	2.933		1	63	15	FB	0.61651
1	39	3	FLAG-BirA	3.8528		1	64	1	FB	0.39237
1	39	4	FLAG-BirA	2.49694		1	64	2	FB	0.414847
1	39	5	FLAG-BirA	6.93042		1	64	3	FB	0.0970016
1	39	6	FLAG-BirA	2.1319		1	64	4	FB	0.256611
1	39	7	FLAG-BirA	2.09477		1	64	5	FB	0.32668
1	39	8	FLAG-BirA	1.65643		1	64	6	FB	0.421607
1	39	9	FLAG-BirA	3.28421		1	64	7	FB	0.343587
1	40	1	FLAG-BirA	1.96008		1	64	8	FB	0.135241
1	40	2	FLAG-BirA	2.33555		1	64	9	FB	0.0644694
1	40	3	FLAG-BirA	1.24404		1	64	10	FB	0.376349
1	40	4	FLAG-BirA	10.2818		1	64	11	FB	0.277821
1	40	5	FLAG-BirA	1.87932		1	64	12	FB	0.535271
1	40	6	FLAG-BirA	3.99985		1	64	13	FB	0.0630961
1	40	7	FLAG-BirA	4.68124		1	64	14	FB	0.686809
1	40	8	FLAG-BirA	1.82472		1	65	1	FB	0.312383
1	40	9	FLAG-BirA	2.83565		1	65	2	FB	0.644678
1	40	10	FLAG-BirA	1.22896		1	65	3	FB	0.342535
1	40	11	FLAG-BirA	1.0761		1	65	4	FB	0.536965
2	41	1	FLAG-BirA	0.638926		1	65	5	FB	0.290211
2	41	2	FLAG-BirA	0.438163		1	65	6	FB	0.11043
2	41	3	FLAG-BirA	0.606027		1	65	7	FB	0.0744183
2	41	4	FLAG-BirA	1.28644		1	65	8	FB	0.0914931
2	41	5	FLAG-BirA	0.473945		1	65	9	FB	0.90309
2	41	6	FLAG-BirA	0.259022		1	65	10	FB	0.432731
2	41	7	FLAG-BirA	0.438529		1	65	11	FB	0.378485
2	41	8	FLAG-BirA	0.363272		1	65	12	FB	0.335393
2	41	9	FLAG-BirA	0.338811		1	65	13	FB	0.368246
2	41	10	FLAG-BirA	0.531472		1	66	1	FB	0.23035
2	41	11	FLAG-BirA	0.596384		1	66	2	FB	0.37232
2	41	12	FLAG-BirA	0.515648		1	66	3	FB	0.547738
2	41	13	FLAG-BirA	1.17751		1	66	4	FB	0.592599
2	42	1	FLAG-BirA	2.08907		1	66	5	FB	0.136065
2	42	2	FLAG-BirA	2.63143		1	66	6	FB	0.0255589
2	42	3	FLAG-BirA	2.31838		1	66	7	FB	0.752041
2	42	4	FLAG-BirA	2.01683		1	66	8	FB	0.425925
2	42	5	FLAG-BirA	4.63316		1	66	9	FB	0.238178
2	42	6	FLAG-BirA	3.71839		1	66	10	FB	0.347631
2	42	7	FLAG-BirA	2.74137		1	66	11	FB	0.314229
2	42	8	FLAG-BirA	2.6867		1	66	12	FB	0.58822
2	42	9	FLAG-BirA	0.647593		1	67	1	FB	0.589593
2	42	10	FLAG-BirA	1.8009		1	67	2	FB	0.664714
2	42	11	FLAG-BirA	2.15178		1	67	3	FB	0.495445
2	42	12	FLAG-BirA	1.09874		1	67	4	FB	0.886122
2	42	13	FLAG-BirA	0.84686		1	67	5	FB	0.174197
2	43	1	FLAG-BirA	0.598352		1	67	6	FB	0.664897
2	43	2	FLAG-BirA	1.83746		1	67	7	FB	0.556405
2	43	3	FLAG-BirA	0.284962		1	67	8	FB	0.544915
2	43	4	FLAG-BirA	1.11456		1	67	9	FB	0.165759
2	43	5	FLAG-BirA	0.765591		1	67	10	FB	0.207401
2	43	6	FLAG-BirA	0.895979		1	67	11	FB	0.404562
2	43	7	FLAG-BirA	0.48687		1	67	12	FB	0.0525063
2	43	8	FLAG-BirA	0.799435		1	68	1	FB	0.0556954
2	43	9	FLAG-BirA	0.286183		1	68	2	FB	0.31368
2	43	10	FLAG-BirA	0.378637		1	68	3	FB	0.521386
2	43	11	FLAG-BirA	0.517479		1	68	4	FB	0.822522
2	43	12	FLAG-BirA	0.921401		1	68	5	FB	0.492866
2	43	13	FLAG-BirA	0.86186		1	68	6	FB	0.395438
2	43	14	FLAG-BirA	0.36083		1	68	7	FB	0.44445
2	44	1	FLAG-BirA	1.37385		1	68	8	FB	0.34435
2	44	2	FLAG-BirA	0.732616		1	68	9	FB	0.174044
2	44	3	FLAG-BirA	1.16902		1	68	10	FB	0.832364
2	44	4	FLAG-BirA	0.971435		1	68	11	FB	0.90222
2	44	5	FLAG-BirA	1.17722		1	68	12	FB	0.310903
2	44	6	FLAG-BirA	0.460105		1	69	1	FB	0.277714
2	44	7	FLAG-BirA	1.02087		1	69	2	FB	0.611597
2	44	8	FLAG-BirA	2.31208		1	69	3	FB	0.55816
2	44	9	FLAG-BirA	0.242359		1	69	4	FB	0.356481
2	44	10	FLAG-BirA	0.623835		1	69	5	FB	0.81854
2	44	11	FLAG-BirA	0.457389		1	69	6	FB	0.498543
2	44	12	FLAG-BirA	0.679545		1	69	7	FB	0.36025
2	44	13	FLAG-BirA	1.12972		1	69	8	FB	0.975402
2	45	1	FLAG-BirA	1.18595		1	69	9	FB	0.487907
2	45	2	FLAG-BirA	0.941573		1	69	10	FB	0.0653086
2	45	3	FLAG-BirA	1.48527		1	69	11	FB	0.293462
2	45	4	FLAG-BirA	2.90645		1	70	1	FB	0.505653
2	45	5	FLAG-BirA	3.68121		1	70	2	FB	0.893568
2	45	6	FLAG-BirA	4.2146		1	70	3	FB	0.503212
2	45	7	FLAG-BirA	4.45795		1	70	4	FB	0.352773
2	45	8	FLAG-BirA	2.50524		1	70	5	FB	0.407385
2	45	9	FLAG-BirA	1.10253		1	70	6	FB	0.0971084
2	45	10	FLAG-BirA	2.94968		1	70	7	FB	0.166796
2	45	11	FLAG-BirA	1.98		1	70	8	FB	0.453529
2	45	12	FLAG-BirA	2.12459		1	70	9	FB	0.477241
2	45	13	FLAG-BirA	3.09599		1	70	10	FB	0.170962
2	46	1	FLAG-BirA	1.85927		1	70	11	FB	0.416022
2	46	2	FLAG-BirA	0.907225		1	70	12	FB	0.341131
2	46	3	FLAG-BirA	3.37276		1	70	13	FB	0.21326
2	46	4	FLAG-BirA	1.65418		1	70	14	FB	0.144106
2	46	5	FLAG-BirA	2.31739		1	70	15	FB	0.125505
2	46	6	FLAG-BirA	1.37725		1	70	16	FB	0.35024
2	46	7	FLAG-BirA	3.30588		1	70	17	FB	0.191943
2	46	8	FLAG-BirA	2.07266		2	71	1	FB	0.49485
2	46	9	FLAG-BirA	3.2191		2	71	2	FB	0.325078
2	46	10	FLAG-BirA	2.2788		2	71	3	FB	0.867369
2	46	11	FLAG-BirA	2.91266		2	71	4	FB	0.184176
2	46	12	FLAG-BirA	3.17856		2	71	5	FB	0.45182
2	47	1	FLAG-BirA	2.09624		2	71	6	FB	0.137758
2	47	2	FLAG-BirA	1.87411		2	71	7	FB	0.27097
2	47	3	FLAG-BirA	0.530144		2	71	8	FB	0.695369
2	47	4	FLAG-BirA	1.51876		2	71	9	FB	0.114702
2	47	5	FLAG-BirA	1.78647		2	71	10	FB	0.241016
2	47	6	FLAG-BirA	2.37813		2	71	11	FB	0.196521
2	47	7	FLAG-BirA	1.81112		2	71	12	FB	0.438392
2	47	8	FLAG-BirA	2.4645		2	71	13	FB	0.262638
2	47	9	FLAG-BirA	1.92528		2	71	14	FB	0.186587
2	48	1	FLAG-BirA	0.993881		2	71	15	FB	0.220157
2	48	2	FLAG-BirA	0.583444		2	71	16	FB	0.0868544
2	48	3	FLAG-BirA	0.789593		2	71	17	FB	0.121798
2	48	4	FLAG-BirA	1.03932		2	72	1	FB	0.128527
2	48	5	FLAG-BirA	0.993149		2	72	2	FB	0.1935
2	48	6	FLAG-BirA	1.15645		2	72	3	FB	0.232486
2	48	7	FLAG-BirA	0.825589		2	72	4	FB	0.0334783
2	48	8	FLAG-BirA	1.31693		2	72	5	FB	0.302449
2	48	9	FLAG-BirA	0.636393		2	72	6	FB	0.256947
2	48	10	FLAG-BirA	0.637934		2	72	7	FB	0.388586
2	48	11	FLAG-BirA	0.454246		2	72	8	FB	0.141604
2	49	1	FLAG-BirA	3.69459		2	72	9	FB	0.176516
2	49	2	FLAG-BirA	2.14914		2	72	10	FB	0.27158
2	49	3	FLAG-BirA	0.993149		2	72	11	FB	0.146777
2	49	4	FLAG-BirA	1.52891		2	72	12	FB	0.167834
2	49	5	FLAG-BirA	0.714549		2	72	13	FB	0.157382
2	49	6	FLAG-BirA	1.76913		2	72	14	FB	0.172473
2	49	7	FLAG-BirA	2.53722		2	72	15	FB	3.21334
2	49	8	FLAG-BirA	2.50468		2	72	16	FB	0.262943
2	49	9	FLAG-BirA	1.71559		2	72	17	FB	0.0203708
2	49	10	FLAG-BirA	2.44067		2	72	18	FB	0.092134
2	50	1	FLAG-BirA	1.65901		2	72	19	FB	0.20058
2	50	2	FLAG-BirA	2.40998		2	73	1	FB	0.129931
2	50	3	FLAG-BirA	2.06915		2	73	2	FB	0.214771
2	50	4	FLAG-BirA	1.92334		2	73	3	FB	0.142672
2	50	5	FLAG-BirA	1.54626		2	73	4	FB	0.166323
2	50	6	FLAG-BirA	2.67106		2	73	5	FB	0.173678
2	50	7	FLAG-BirA	2.12721		2	73	6	FB	0.192416
2	50	8	FLAG-BirA	4.85487		2	73	7	FB	0.135409
2	50	9	FLAG-BirA	1.72438		2	73	8	FB	0.248035
3	51	1	FLAG-BirA	2.8127		2	73	9	FB	0.132097
3	51	2	FLAG-BirA	2.38857		2	74	1	FB	0.0840162
3	51	3	FLAG-BirA	1.85254		2	74	2	FB	0.337255
3	51	4	FLAG-BirA	2.57934		2	74	3	FB	0.447196
3	51	5	FLAG-BirA	2.80607		2	74	4	FB	0.50808
3	51	6	FLAG-BirA	3.51397		2	74	5	FB	0.355459
3	51	7	FLAG-BirA	2.92		2	74	6	FB	0.197406
3	51	8	FLAG-BirA	2.92041		2	74	7	FB	0.184573
3	51	9	FLAG-BirA	1.99269		2	74	8	FB	0.266148
3	51	10	FLAG-BirA	1.89999		2	74	9	FB	0.498177
3	51	11	FLAG-BirA	1.22905		2	74	10	FB	0.0620737
3	51	12	FLAG-BirA	2.3407		2	74	11	FB	0.0878004
3	51	13	FLAG-BirA	1.71485		2	74	12	FB	0.153079
3	52	1	FLAG-BirA	4.23087		2	74	13	FB	0.248981
3	52	2	FLAG-BirA	3.83407		2	74	14	FB	0.353613
3	52	3	FLAG-BirA	2.32248		2	75	1	FB	0.320195
3	52	4	FLAG-BirA	3.00893		2	75	2	FB	0.168658
3	52	5	FLAG-BirA	2.66532		2	75	3	FB	0.252064
3	52	6	FLAG-BirA	3.02318		2	75	4	FB	0.295506
3	52	7	FLAG-BirA	4.66563		2	75	5	FB	0.2486
3	53	1	FLAG-BirA	2.0949		2	75	6	FB	0.0755779
3	53	2	FLAG-BirA	4.00652		2	75	7	FB	0.108934
3	53	3	FLAG-BirA	2.97311		2	75	8	FB	0.747021
3	53	4	FLAG-BirA	1.52805		2	75	9	FB	0.639902
3	53	5	FLAG-BirA	2.02811		2	75	10	FB	0.465446
3	53	6	FLAG-BirA	1.51609		2	75	11	FB	0.284474
3	53	7	FLAG-BirA	1.00955		2	75	12	FB	1.04443
3	53	8	FLAG-BirA	2.28206		2	75	13	FB	0.470375
3	53	9	FLAG-BirA	2.13263		2	75	14	FB	0.190997
3	53	10	FLAG-BirA	1.20731		2	76	1	FB	0.419409
3	53	11	FLAG-BirA	2.24022		2	76	2	FB	0.3075
3	54	1	FLAG-BirA	1.46098		2	76	3	FB	0.908858
3	54	2	FLAG-BirA	0.836606		2	76	4	FB	0.336934
3	54	3	FLAG-BirA	2.45153		2	76	5	FB	0.179538
3	54	4	FLAG-BirA	2.41312		2	76	6	FB	0.567269
3	54	5	FLAG-BirA	1.31405		2	76	7	FB	0.595773
3	54	6	FLAG-BirA	1.45354		2	76	8	FB	0.26598
3	54	7	FLAG-BirA	1.24184		2	76	9	FB	0.0363012
3	54	8	FLAG-BirA	1.82576		2	76	10	FB	0.21062
3	54	9	FLAG-BirA	1.46854		2	76	11	FB	0.14818
3	54	10	FLAG-BirA	2.03621		2	76	12	FB	0.77406
3	55	1	FLAG-BirA	2.08264		2	77	1	FB	0.366415
3	55	2	FLAG-BirA	2.05161		2	77	2	FB	0.172015
3	55	3	FLAG-BirA	6.52035		2	77	3	FB	0.154971
3	55	4	FLAG-BirA	4.24343		2	77	4	FB	0.475181
3	55	5	FLAG-BirA	1.75428		2	77	5	FB	0.0724193
3	55	6	FLAG-BirA	1.6033		2	77	6	FB	0.111681
3	55	7	FLAG-BirA	1.25962		2	77	7	FB	0.132265
3	55	8	FLAG-BirA	2.03365		2	77	8	FB	0.322057
3	55	9	FLAG-BirA	6.28341		2	77	9	FB	0.271992
3	55	10	FLAG-BirA	2.29638		2	77	10	FB	0.257404
3	56	1	FLAG-BirA	0.606256		2	77	11	FB	0.185351
3	56	2	FLAG-BirA	0.613123		2	77	12	FB	1.47869
3	56	3	FLAG-BirA	2.59628		2	77	13	FB	0.274983
3	56	4	FLAG-BirA	2.38857		2	77	14	FB	0.423102
3	56	5	FLAG-BirA	3.50774		2	77	15	FB	0.638972
3	56	6	FLAG-BirA	2.85107		2	78	1	FB	0.416144
3	56	7	FLAG-BirA	1.90025		2	78	2	FB	0.137469
3	56	8	FLAG-BirA	0.934874		2	78	3	FB	0.330098
3	56	9	FLAG-BirA	2.62968		2	78	4	FB	0.138827
3	57	1	FLAG-BirA	2.51757		2	78	5	FB	0.52874
3	57	2	FLAG-BirA	1.46629		2	78	6	FB	0.340398
3	57	3	FLAG-BirA	1.06493		2	78	7	FB	0.415869
3	57	4	FLAG-BirA	1.11026		2	78	8	FB	0.0804303
3	57	5	FLAG-BirA	1.02342		2	78	9	FB	0.248737
3	57	6	FLAG-BirA	0.666377		2	78	10	FB	0.314458
3	57	7	FLAG-BirA	1.45461		2	78	11	FB	0.370062
3	57	8	FLAG-BirA	1.18997		2	78	12	FB	0.0352636
3	57	9	FLAG-BirA	0.597253		2	79	1	FB	0.348379
3	57	10	FLAG-BirA	0.912657		2	79	2	FB	0.145403
3	57	11	FLAG-BirA	1.38734		2	79	3	FB	0.374426
3	57	12	FLAG-BirA	0.730495		2	79	4	FB	0.3561
3	57	13	FLAG-BirA	1.11389		2	79	5	FB	0.354284
3	58	1	FLAG-BirA	2.68199		2	79	6	FB	0.52256
3	58	2	FLAG-BirA	1.91623		2	79	7	FB	0.296239
3	58	3	FLAG-BirA	1.98183		2	79	8	FB	0.358938
3	58	4	FLAG-BirA	1.83641		2	79	9	FB	0.19234
3	58	5	FLAG-BirA	3.90628		2	79	10	FB	0.45034
3	58	6	FLAG-BirA	1.94972		2	79	11	FB	0.53257
3	58	7	FLAG-BirA	1.22266		2	79	12	FB	0.0551919
3	58	8	FLAG-BirA	1.64546		2	79	13	FB	0.527459
3	58	9	FLAG-BirA	2.5564		2	79	14	FB	0.272847
3	58	10	FLAG-BirA	0.370809		2	79	15	FB	0.51368
3	59	1	FLAG-BirA	0.516136		2	79	16	FB	0.119493
3	59	2	FLAG-BirA	2.29355		2	79	17	FB	0.780423
3	59	3	FLAG-BirA	0.91519		2	79	18	FB	0.451026
3	59	4	FLAG-BirA	1.63252		2	79	19	FB	0.799603
3	59	5	FLAG-BirA	1.19193		2	79	20	FB	0.263447
3	59	6	FLAG-BirA	2.30068		2	79	21	FB	0.184344
3	59	7	FLAG-BirA	0.422782		2	79	22	FB	0.372076
3	59	8	FLAG-BirA	2.66961		2	80	1	FB	0.266087
3	59	9	FLAG-BirA	2.05597		2	80	2	FB	0.335973
3	59	10	FLAG-BirA	1.37763		2	80	3	FB	1.14255
3	59	11	FLAG-BirA	0.299229		2	80	4	FB	0.54548
3	60	1	FLAG-BirA	3.36194		2	80	5	FB	0.171908
3	60	2	FLAG-BirA	2.8088		2	80	6	FB	0.719081
3	60	3	FLAG-BirA	3.07579		2	80	7	FB	0.029633
3	60	4	FLAG-BirA	1.76777		2	80	8	FB	1.43845
3	60	5	FLAG-BirA	3.64636		2	80	9	FB	0.128328
3	60	6	FLAG-BirA	3.70356		3	81	1	FB	0.490379
3	60	7	FLAG-BirA	2.65962		3	81	2	FB	0.561837
3	60	8	FLAG-BirA	1.60494		3	81	3	FB	0.345022
3	60	9	FLAG-BirA	4.89834		3	81	4	FB	0.153872
3	60	10	FLAG-BirA	2.54319		3	81	5	FB	0.386709
						3	81	6	FB	0.125078
						3	81	7	FB	0.417563
						3	81	8	FB	0.399069
						3	81	9	FB	0.555352
						3	81	10	FB	0.28603
						3	82	1	FB	0.734661
						3	82	2	FB	0.932235
						3	82	3	FB	0.227573
						3	82	4	FB	0.430686
						3	82	5	FB	0.222019
						3	82	6	FB	0.0661021
						3	82	7	FB	0.41088
						3	82	8	FB	0.297612
						3	82	9	FB	0.586603
						3	82	10	FB	0.315282
						3	82	11	FB	0.363729
						3	82	12	FB	0.58645
						3	83	1	FB	0.695964
						3	83	2	FB	1.01474
						3	83	3	FB	0.633021
						3	83	4	FB	0.516396
						3	83	5	FB	0.524315
						3	83	6	FB	0.100145
						3	83	7	FB	0.546349
						3	83	8	FB	0.310613
						3	83	9	FB	0.153933
						3	83	10	FB	0.274266
						3	83	11	FB	0.300435
						3	83	12	FB	0.430991
						3	83	13	FB	0.113741
						3	84	1	FB	0.480003
						3	84	2	FB	0.775723
						3	84	3	FB	0.909056
						3	84	4	FB	0.207614
						3	84	5	FB	0.17911
						3	84	6	FB	0.600443
						3	84	7	FB	0.370962
						3	84	8	FB	0.250568
						3	84	9	FB	0.161578
						3	84	10	FB	0.396902
						3	84	11	FB	0.853285
						3	85	1	FB	0.370184
						3	85	2	FB	0.580606
						3	85	3	FB	0.1832
						3	85	4	FB	0.294255
						3	85	5	FB	0.359701
						3	85	6	FB	0.437369
						3	85	7	FB	0.577737
						3	85	8	FB	0.685634
						3	85	9	FB	0.369986
						3	85	10	FB	0.0794842
						3	85	11	FB	0.403128
						3	85	12	FB	0.580423
						3	85	13	FB	0.598367
						3	85	14	FB	0.313466
						3	85	15	FB	0.10338
						3	86	1	FB	0.10277
						3	86	2	FB	0.033341
						3	86	3	FB	0.504891
						3	86	4	FB	0.515816
						3	86	5	FB	0.189258
						3	86	6	FB	0.613306
						3	86	7	FB	0.0481117
						3	86	8	FB	0.303868
						3	86	9	FB	0.421241
						3	86	10	FB	0.543618
						3	86	11	FB	0.3776
						3	86	12	FB	0.667018
						3	86	13	FB	0.150958
						3	87	1	FB	0.353201
						3	87	2	FB	0.0749676
						3	87	3	FB	0.647471
						3	87	4	FB	0.242924
						3	87	5	FB	0.16228
						3	87	6	FB	0.432837
						3	87	7	FB	0.611231
						3	87	8	FB	0.281788
						3	87	9	FB	1.12395
						3	87	10	FB	0.153475
						3	87	11	FB	0.288609
						3	87	12	FB	0.212222
						3	87	13	FB	0.257542
						3	87	14	FB	0.480583
						3	87	15	FB	0.246418
						3	87	16	FB	0.378195
						3	88	1	FB	0.0615091
						3	88	2	FB	0.116197
						3	88	3	FB	0.2177
						3	88	4	FB	0.345602
						3	88	5	FB	0.533791
						3	88	6	FB	0.956497
						3	88	7	FB	0.381872
						3	88	8	FB	1.17194
						3	88	9	FB	0.398566
						3	88	10	FB	0.288197
						3	88	11	FB	0.301198
						3	89	1	FB	0.505592
						3	89	2	FB	0.517144
						3	89	3	FB	0.225086
						3	89	4	FB	0.527581
						3	89	5	FB	0.436118
						3	89	6	FB	0.482582
						3	89	7	FB	0.305241
						3	89	8	FB	0.511681
						3	89	9	FB	0.231724
						3	89	10	FB	0.280125
						3	90	1	FB	0.451041
						3	90	2	FB	0.264591
						3	90	3	FB	0.218204
						3	90	4	FB	0.313512
						3	90	5	FB	0.177829
						3	90	6	FB	0.298009
						3	90	7	FB	0.417227
						3	90	8	FB	0.208713
						3	90	9	FB	0.432837
						3	90	10	FB	0.711177
						3	90	11	FB	0.445365
						3	90	12	FB	0.389868
						3	90	13	FB	0.146395
						3	90	14	FB	0.243442
						3	90	15	FB	0.351125
						3	90	16	FB	0.0942092
						1	91	1	FBd505	4.36942
						1	91	2	FBd505	0.191974
						1	91	3	FBd505	12.1859
						1	91	4	FBd505	4.07068
						1	91	5	FBd505	8.16597
						1	91	6	FBd505	7.05097
						1	91	7	FBd505	0.306477
						1	91	8	FBd505	4.26627
						1	92	1	FBd505	4.99384
						1	92	2	FBd505	5.07747
						1	92	3	FBd505	6.95912
						1	92	4	FBd505	5.41695
						1	92	5	FBd505	10.4585
						1	92	6	FBd505	11.3925
						1	92	7	FBd505	5.55943
						1	92	8	FBd505	6.62979
						1	93	1	FBd505	11.9327
						1	93	2	FBd505	8.24239
						1	93	3	FBd505	0.70042
						1	93	4	FBd505	7.40653
						1	93	5	FBd505	3.60323
						1	93	6	FBd505	9.58877
						1	93	7	FBd505	8.83615
						1	93	8	FBd505	7.18828
						1	93	9	FBd505	7.03857
						1	93	10	FBd505	6.81788
						1	94	1	FBd505	3.637
						1	94	2	FBd505	0.146304
						1	94	3	FBd505	7.37839
						1	94	4	FBd505	5.93805
						1	94	5	FBd505	6.35335
						1	94	6	FBd505	5.9172
						1	94	7	FBd505	3.91894
						1	94	8	FBd505	1.01295
						1	94	9	FBd505	7.64964
						1	94	10	FBd505	6.10793
						1	95	1	FBd505	8.64674
						1	95	2	FBd505	8.0789
						1	95	3	FBd505	8.10483
						1	95	4	FBd505	5.45243
						1	95	5	FBd505	6.5483
						1	95	6	FBd505	3.44302
						1	96	1	FBd505	9.53663
						1	96	2	FBd505	2.60354
						1	96	3	FBd505	7.95724
						1	96	4	FBd505	10.0123
						1	96	5	FBd505	14.7946
						1	96	6	FBd505	4.7832
						1	96	7	FBd505	5.07887
						1	97	1	FBd505	0.188891
						1	97	2	FBd505	5.01013
						1	97	3	FBd505	7.64919
						1	97	4	FBd505	12.8826
						1	97	5	FBd505	7.36728
						1	97	6	FBd505	7.52219
						1	98	1	FBd505	9.60702
						1	98	2	FBd505	0.391287
						1	98	3	FBd505	5.10585
						1	98	4	FBd505	8.4911
						1	98	5	FBd505	7.13123
						1	98	6	FBd505	0.235996
						1	98	7	FBd505	8.72351
						1	98	8	FBd505	7.88124
						1	99	1	FBd505	6.32937
						1	99	2	FBd505	5.55622
						1	99	3	FBd505	5.88925
						1	99	4	FBd505	4.46523
						1	99	5	FBd505	5.38323
						1	99	6	FBd505	4.96252
						1	99	7	FBd505	3.74943
						1	100	1	FBd505	7.4492
						1	100	2	FBd505	3.37618
						1	100	3	FBd505	3.14066
						1	100	4	FBd505	11.5356
						1	100	5	FBd505	7.70169
						1	100	6	FBd505	3.2034
						1	100	7	FBd505	4.67785
						1	100	8	FBd505	3.03697
						2	101	1	FBd505	6.91011
						2	101	2	FBd505	4.29456
						2	101	3	FBd505	6.70849
						2	101	4	FBd505	7.51727
						2	101	5	FBd505	1.31638
						2	101	6	FBd505	7.81328
						2	101	7	FBd505	0.465492
						2	101	8	FBd505	6.79892
						2	101	9	FBd505	0.250065
						2	101	10	FBd505	5.71601
						2	102	1	FBd505	10.5029
						2	102	2	FBd505	5.39989
						2	102	3	FBd505	5.09108
						2	102	4	FBd505	4.43513
						2	102	5	FBd505	4.749
						2	102	6	FBd505	3.31608
						2	102	7	FBd505	4.30756
						2	103	1	FBd505	4.86604
						2	103	2	FBd505	8.05235
						2	103	3	FBd505	2.82115
						2	103	4	FBd505	7.63262
						2	103	5	FBd505	7.9521
						2	103	6	FBd505	6.93251
						2	103	7	FBd505	4.95752
						2	103	8	FBd505	6.74618
						2	103	9	FBd505	6.08893
						2	104	1	FBd505	3.67988
						2	104	2	FBd505	4.7884
						2	104	3	FBd505	8.73121
						2	104	4	FBd505	9.95184
						2	104	5	FBd505	0.4533
						2	104	6	FBd505	8.80044
						2	104	7	FBd505	4.67018
						2	104	8	FBd505	13.3921
						2	104	9	FBd505	3.14304
						2	105	1	FBd505	8.99495
						2	105	2	FBd505	5.86857
						2	105	3	FBd505	6.19026
						2	105	4	FBd505	11.3936
						2	105	5	FBd505	5.42271
						2	105	6	FBd505	7.16167
						2	105	7	FBd505	11.0491
						2	105	8	FBd505	6.08302
						2	106	1	FBd505	4.73358
						2	106	2	FBd505	5.44767
						2	106	3	FBd505	7.26209
						2	106	4	FBd505	6.05765
						2	106	5	FBd505	3.73297
						2	106	6	FBd505	5.05275
						2	106	7	FBd505	10.155
						2	107	1	FBd505	9.90909
						2	107	2	FBd505	13.8774
						2	107	3	FBd505	6.25806
						2	107	4	FBd505	13.1092
						2	107	5	FBd505	2.77816
						2	107	6	FBd505	7.14627
						2	107	7	FBd505	7.09938
						2	107	8	FBd505	8.11786
						2	107	9	FBd505	4.40621
						2	107	10	FBd505	5.64961
						2	108	1	FBd505	2.12567
						2	108	2	FBd505	4.10097
						2	108	3	FBd505	13.6642
						2	108	4	FBd505	0.851621
						2	108	5	FBd505	3.7641
						2	108	6	FBd505	6.94002
						2	108	7	FBd505	6.45325
						2	108	8	FBd505	7.99937
						2	109	1	FBd505	7.12184
						2	109	2	FBd505	4.39654
						2	109	3	FBd505	6.49792
						2	109	4	FBd505	5.64144
						2	109	5	FBd505	6.39529
						2	109	6	FBd505	6.01991
						2	109	7	FBd505	5.08167
						2	110	1	FBd505	5.87738
						2	110	2	FBd505	4.46561
						2	110	3	FBd505	9.92667
						2	110	4	FBd505	3.59368
						2	110	5	FBd505	6.47582
						2	110	6	FBd505	16.102
						2	110	7	FBd505	9.80772
						2	110	8	FBd505	7.60409
						2	110	9	FBd505	7.03981
						2	110	10	FBd505	6.41117
						3	111	1	FBd505	7.12158
						3	111	2	FBd505	5.78242
						3	111	3	FBd505	5.04988
						3	111	4	FBd505	10.906
						3	111	5	FBd505	6.85916
						3	111	6	FBd505	9.7482
						3	112	1	FBd505	4.91974
						3	112	2	FBd505	0.262821
						3	112	3	FBd505	7.88023
						3	112	4	FBd505	7.26003
						3	112	5	FBd505	4.33993
						3	112	6	FBd505	6.59574
						3	112	7	FBd505	6.02492
						3	113	1	FBd505	3.84675
						3	113	2	FBd505	9.1601
						3	113	3	FBd505	13.9772
						3	113	4	FBd505	5.94044
						3	113	5	FBd505	10.2073
						3	113	6	FBd505	2.81485
						3	113	7	FBd505	8.32038
						3	113	8	FBd505	3.76344
						3	113	9	FBd505	5.91472
						3	114	1	FBd505	7.04527
						3	114	2	FBd505	5.9014
						3	114	3	FBd505	6.04933
						3	114	4	FBd505	4.40528
						3	114	5	FBd505	12.3367
						3	114	6	FBd505	5.62773
						3	115	1	FBd505	6.54089
						3	115	2	FBd505	4.85771
						3	115	3	FBd505	12.7347
						3	115	4	FBd505	4.99901
						3	115	5	FBd505	7.86893
						3	115	6	FBd505	8.26049
						3	115	7	FBd505	5.05446
						3	115	8	FBd505	8.34734
						3	115	9	FBd505	10.963
						3	115	10	FBd505	10.862
						3	115	11	FBd505	4.17259
						3	116	1	FBd505	8.25377
						3	116	2	FBd505	6.26191
						3	116	3	FBd505	7.26538
						3	116	4	FBd505	9.40642
						3	116	5	FBd505	9.76985
						3	116	6	FBd505	5.8024
						3	116	7	FBd505	8.23085
						3	116	8	FBd505	4.39864
						3	116	9	FBd505	14.6395
						3	117	1	FBd505	9.11659
						3	117	2	FBd505	5.03236
						3	117	3	FBd505	5.87507
						3	117	4	FBd505	3.16048
						3	117	5	FBd505	14.2736
						3	117	6	FBd505	12.3192
						3	117	7	FBd505	8.40972
						3	118	1	FBd505	6.4043
						3	118	2	FBd505	6.72589
						3	118	3	FBd505	13.7198
						3	118	4	FBd505	8.38401
						3	118	5	FBd505	5.21071
						3	118	6	FBd505	0.740169
						3	118	7	FBd505	4.36345
						3	118	8	FBd505	5.09918
						3	118	9	FBd505	5.19564
						3	118	10	FBd505	5.46818
						3	118	11	FBd505	4.5575
						3	119	1	FBd505	0.183688
						3	119	2	FBd505	7.44161
						3	119	3	FBd505	6.2963
						3	119	4	FBd505	5.04678
						3	119	5	FBd505	2.71742
						3	119	6	FBd505	3.70459
						3	119	7	FBd505	7.1187
						3	119	8	FBd505	8.32651
						3	119	9	FBd505	5.08286
						3	119	10	FBd505	5.62577
						3	120	1	FBd505	9.77568
						3	120	2	FBd505	3.85983
						3	120	3	FBd505	4.66906
						3	120	4	FBd505	9.33193
						3	120	5	FBd505	3.90048
						3	120	6	FBd505	9.20722
						3	120	7	FBd505	5.65237

## Sheet: SuppFigure7_1G
Replicate	TRIM37 rescue construct	Induced	Condition	Intensity	DMSO average	Percent DMSO
1	d505-709	DMSO	DMSO	2361150094	2.33334e+09	1.01192
1	d505-709	DMSO	DMSO	2305529019	2.33334e+09	0.988081
1	d505-709	DMSO	50 nM	1327514636	2.33334e+09	0.568933
1	d505-709	DMSO	50 nM	1706244585	2.33334e+09	0.731246
1	d505-709	DMSO	125 nM	1834711935	2.33334e+09	0.786303
1	d505-709	DMSO	125 nM	2045627154	2.33334e+09	0.876695
1	d505-709	DMSO	150 nM	1914507887	2.33334e+09	0.820501
1	d505-709	DMSO	150 nM	2058465595	2.33334e+09	0.882197
1	d505-709	DMSO	167 nM	1799056878	2.33334e+09	0.771022
1	d505-709	DMSO	167 nM	1740522292	2.33334e+09	0.745936
1	d505-709	DMSO	200 nM	1699816063	2.33334e+09	0.728491
1	d505-709	DMSO	200 nM	1749157634	2.33334e+09	0.749637
1	d505-709	DMSO	500 nM	1762017099	2.33334e+09	0.755148
1	d505-709	DMSO	500 nM	1907658914	2.33334e+09	0.817566
1	d505-709	DOX	DMSO	1855631951	2.33334e+09	0.795269
1	d505-709	DOX	DMSO	1810359927	2.33334e+09	0.775866
1	d505-709	DOX	50 nM	987765446	2.33334e+09	0.423327
1	d505-709	DOX	50 nM	1544724294	2.33334e+09	0.662023
1	d505-709	DOX	125 nM	578890923	2.33334e+09	0.248095
1	d505-709	DOX	125 nM	466394787	2.33334e+09	0.199883
1	d505-709	DOX	150 nM	942195081	2.33334e+09	0.403797
1	d505-709	DOX	150 nM	738893220	2.33334e+09	0.316668
1	d505-709	DOX	167 nM	585871355	2.33334e+09	0.251087
1	d505-709	DOX	167 nM	669323629	2.33334e+09	0.286852
1	d505-709	DOX	200 nM	464466349	2.33334e+09	0.199056
1	d505-709	DOX	200 nM	356712099	2.33334e+09	0.152876
1	d505-709	DOX	500 nM	127270338	2.33334e+09	0.0545443
1	d505-709	DOX	500 nM	333916084	2.33334e+09	0.143107
2	d505-709	DMSO	DMSO	2465700149	2.39212e+09	1.03076
2	d505-709	DMSO	DMSO	2318532890	2.39212e+09	0.969239
2	d505-709	DMSO	50 nM	1132168288	2.39212e+09	0.473291
2	d505-709	DMSO	50 nM	1169302306	2.39212e+09	0.488815
2	d505-709	DMSO	125 nM	1312018045	2.39212e+09	0.548476
2	d505-709	DMSO	125 nM	1245080682	2.39212e+09	0.520493
2	d505-709	DMSO	150 nM	1386116617	2.39212e+09	0.579452
2	d505-709	DMSO	150 nM	1763732932	2.39212e+09	0.737311
2	d505-709	DMSO	167 nM	1343746596	2.39212e+09	0.56174
2	d505-709	DMSO	167 nM	1583607263	2.39212e+09	0.662011
2	d505-709	DMSO	200 nM	1254258322	2.39212e+09	0.52433
2	d505-709	DMSO	200 nM	1412906630	2.39212e+09	0.590651
2	d505-709	DMSO	500 nM	1335631985	2.39212e+09	0.558347
2	d505-709	DMSO	500 nM	1490158332	2.39212e+09	0.622946
2	d505-709	DOX	DMSO	953963019	2.39212e+09	0.398795
2	d505-709	DOX	DMSO	1133227169	2.39212e+09	0.473734
2	d505-709	DOX	50 nM	726558636	2.39212e+09	0.30373
2	d505-709	DOX	50 nM	607182204	2.39212e+09	0.253826
2	d505-709	DOX	125 nM	406195441	2.39212e+09	0.169806
2	d505-709	DOX	125 nM	298819081	2.39212e+09	0.124918
2	d505-709	DOX	150 nM	559492863	2.39212e+09	0.23389
2	d505-709	DOX	150 nM	682185102	2.39212e+09	0.285181
2	d505-709	DOX	167 nM	432650713	2.39212e+09	0.180865
2	d505-709	DOX	167 nM	451944605	2.39212e+09	0.188931
2	d505-709	DOX	200 nM	419611970	2.39212e+09	0.175415
2	d505-709	DOX	200 nM	362094850	2.39212e+09	0.15137
2	d505-709	DOX	500 nM	421141885	2.39212e+09	0.176054
2	d505-709	DOX	500 nM	364919250	2.39212e+09	0.152551
3	d505-709	DMSO	DMSO	2445739111	2.48384e+09	0.984659
3	d505-709	DMSO	DMSO	2521947652	2.48384e+09	1.01534
3	d505-709	DMSO	50 nM	1283055254	2.48384e+09	0.51656
3	d505-709	DMSO	50 nM	1009662145	2.48384e+09	0.406492
3	d505-709	DMSO	125 nM	1386860501	2.48384e+09	0.558353
3	d505-709	DMSO	125 nM	1166225102	2.48384e+09	0.469524
3	d505-709	DMSO	150 nM	1833367979	2.48384e+09	0.738117
3	d505-709	DMSO	150 nM	2039080456	2.48384e+09	0.820938
3	d505-709	DMSO	167 nM	1818575682	2.48384e+09	0.732162
3	d505-709	DMSO	167 nM	1657997593	2.48384e+09	0.667513
3	d505-709	DMSO	200 nM	1519447578	2.48384e+09	0.611732
3	d505-709	DMSO	200 nM	1415910826	2.48384e+09	0.570048
3	d505-709	DMSO	500 nM	1355941988	2.48384e+09	0.545905
3	d505-709	DMSO	500 nM	1190229323	2.48384e+09	0.479189
3	d505-709	DOX	DMSO	1278833288	2.48384e+09	0.514861
3	d505-709	DOX	DMSO	1306325808	2.48384e+09	0.525929
3	d505-709	DOX	50 nM	736669730	2.48384e+09	0.296585
3	d505-709	DOX	50 nM	662353182	2.48384e+09	0.266665
3	d505-709	DOX	125 nM	360470913	2.48384e+09	0.145126
3	d505-709	DOX	125 nM	261187872	2.48384e+09	0.105155
3	d505-709	DOX	150 nM	473922976	2.48384e+09	0.190802
3	d505-709	DOX	150 nM	594212386	2.48384e+09	0.239231
3	d505-709	DOX	167 nM	537738199	2.48384e+09	0.216494
3	d505-709	DOX	167 nM	491443972	2.48384e+09	0.197856
3	d505-709	DOX	200 nM	322913789	2.48384e+09	0.130006
3	d505-709	DOX	200 nM	308170689	2.48384e+09	0.12407
3	d505-709	DOX	500 nM	498908087	2.48384e+09	0.200861
3	d505-709	DOX	500 nM	512494191	2.48384e+09	0.206331
1	WT	DMSO	DMSO	3332531917	3.27864e+09	1.01644
1	WT	DMSO	DMSO	3224755456	3.27864e+09	0.983564
1	WT	DMSO	50 nM	2243047370	3.27864e+09	0.684139
1	WT	DMSO	50 nM	2521227824	3.27864e+09	0.768985
1	WT	DMSO	125 nM	1825407817	3.27864e+09	0.556757
1	WT	DMSO	125 nM	2060868153	3.27864e+09	0.628573
1	WT	DMSO	150 nM	1977672556	3.27864e+09	0.603198
1	WT	DMSO	150 nM	2335230710	3.27864e+09	0.712255
1	WT	DMSO	167 nM	2120235885	3.27864e+09	0.646681
1	WT	DMSO	167 nM	2196921616	3.27864e+09	0.67007
1	WT	DMSO	200 nM	1860295874	3.27864e+09	0.567398
1	WT	DMSO	200 nM	1880975468	3.27864e+09	0.573705
1	WT	DMSO	500 nM	2184902581	3.27864e+09	0.666404
1	WT	DMSO	500 nM	2245125746	3.27864e+09	0.684773
1	WT	DOX	DMSO	3216939657	3.27864e+09	0.98118
1	WT	DOX	DMSO	3148828814	3.27864e+09	0.960406
1	WT	DOX	50 nM	2558581571	3.27864e+09	0.780378
1	WT	DOX	50 nM	2409910805	3.27864e+09	0.735033
1	WT	DOX	125 nM	1260368055	3.27864e+09	0.384418
1	WT	DOX	125 nM	1176162732	3.27864e+09	0.358735
1	WT	DOX	150 nM	813987923	3.27864e+09	0.24827
1	WT	DOX	150 nM	921503697	3.27864e+09	0.281062
1	WT	DOX	167 nM	614478940	3.27864e+09	0.187419
1	WT	DOX	167 nM	829995703	3.27864e+09	0.253152
1	WT	DOX	200 nM	475899339	3.27864e+09	0.145151
1	WT	DOX	200 nM	550487144	3.27864e+09	0.167901
1	WT	DOX	500 nM	412681357	3.27864e+09	0.12587
1	WT	DOX	500 nM	465591525	3.27864e+09	0.142007
2	WT	DMSO	DMSO	3107893982	2.80038e+09	1.10981
2	WT	DMSO	DMSO	2492861995	2.80038e+09	0.890188
2	WT	DMSO	50 nM	1306026808	2.80038e+09	0.466375
2	WT	DMSO	50 nM	1329552108	2.80038e+09	0.474776
2	WT	DMSO	125 nM	1037116263	2.80038e+09	0.370349
2	WT	DMSO	125 nM	974829070	2.80038e+09	0.348106
2	WT	DMSO	150 nM	1235788453	2.80038e+09	0.441293
2	WT	DMSO	150 nM	1354102077	2.80038e+09	0.483543
2	WT	DMSO	167 nM	1273756569	2.80038e+09	0.454852
2	WT	DMSO	167 nM	1379928069	2.80038e+09	0.492765
2	WT	DMSO	200 nM	1060131564	2.80038e+09	0.378567
2	WT	DMSO	200 nM	1303884806	2.80038e+09	0.46561
2	WT	DMSO	500 nM	953629964	2.80038e+09	0.340536
2	WT	DMSO	500 nM	1013703165	2.80038e+09	0.361988
2	WT	DOX	DMSO	2613080276	2.80038e+09	0.933117
2	WT	DOX	DMSO	2704997920	2.80038e+09	0.96594
2	WT	DOX	50 nM	1461071761	2.80038e+09	0.521741
2	WT	DOX	50 nM	1364543562	2.80038e+09	0.487271
2	WT	DOX	125 nM	602571495	2.80038e+09	0.215175
2	WT	DOX	125 nM	608689354	2.80038e+09	0.21736
2	WT	DOX	150 nM	498374868	2.80038e+09	0.177967
2	WT	DOX	150 nM	580321157	2.80038e+09	0.20723
2	WT	DOX	167 nM	413138138	2.80038e+09	0.147529
2	WT	DOX	167 nM	295807583	2.80038e+09	0.105631
2	WT	DOX	200 nM	264769008	2.80038e+09	0.0945476
2	WT	DOX	200 nM	254833113	2.80038e+09	0.0909995
2	WT	DOX	500 nM	328755076	2.80038e+09	0.117397
2	WT	DOX	500 nM	339013900	2.80038e+09	0.12106
3	WT	DMSO	DMSO	2796418480	2695403337	1.03748
3	WT	DMSO	DMSO	2594388194	2695403337	0.962523
3	WT	DMSO	50 nM	1297936543	2695403337	0.481537
3	WT	DMSO	50 nM	1451730232	2695403337	0.538595
3	WT	DMSO	125 nM	995713363	2695403337	0.369412
3	WT	DMSO	125 nM	1043121083	2695403337	0.387
3	WT	DMSO	150 nM	1554090172	2695403337	0.576571
3	WT	DMSO	150 nM	1714977695	2695403337	0.63626
3	WT	DMSO	167 nM	1445041476	2695403337	0.536113
3	WT	DMSO	167 nM	1290881423	2695403337	0.47892
3	WT	DMSO	200 nM	1144280865	2695403337	0.42453
3	WT	DMSO	200 nM	1214069839	2695403337	0.450422
3	WT	DMSO	500 nM	817242184	2695403337	0.303198
3	WT	DMSO	500 nM	970943338	2695403337	0.360222
3	WT	DOX	DMSO	2438465075	2695403337	0.904675
3	WT	DOX	DMSO	2433695833	2695403337	0.902906
3	WT	DOX	50 nM	1198980911	2695403337	0.444824
3	WT	DOX	50 nM	1445613461	2695403337	0.536325
3	WT	DOX	125 nM	555008353	2695403337	0.205909
3	WT	DOX	125 nM	433285735	2695403337	0.16075
3	WT	DOX	150 nM	398755355	2695403337	0.147939
3	WT	DOX	150 nM	534577389	2695403337	0.198329
3	WT	DOX	167 nM	374720814	2695403337	0.139022
3	WT	DOX	167 nM	327317184	2695403337	0.121435
3	WT	DOX	200 nM	316064047	2695403337	0.11726
3	WT	DOX	200 nM	213969925	2695403337	0.0793833
3	WT	DOX	500 nM	283784903	2695403337	0.105285
3	WT	DOX	500 nM	237985710	2695403337	0.0882932

## Sheet: SuppFigure7_1H
Replicate	Technical replicate	Condition	Line	Time (s)	ROI1	ROI2	ROI3		Replicate	Technical replicate	Condition	Line	Time (s)	ROI1	ROI2	ROI3		Replicate	Technical replicate	Condition	Line	Time (s)	ROI1	ROI2	ROI3
1	1	DMSO	WT	0	432.75	272.35	2.48		2	1	500 nM	WT	0	493.12	261.42	2.43		3	1	500 nM	dTRIM37	0	1851.64	297.43	8.39
1	1	DMSO	WT	4	435.16	264.73	2.55		2	1	500 nM	WT	4	508.85	264.75	2.22		3	1	500 nM	dTRIM37	4	1848.45	302.02	8.53
1	1	DMSO	WT	8	419.94	266.2	2.08		2	1	500 nM	WT	8	501.76	262.24	2.31		3	1	500 nM	dTRIM37	8	1841.83	309.71	8.6
1	1	DMSO	WT	10	25.11	265.8	1.74		2	1	500 nM	WT	10	11.21	261.7	2.7		3	1	500 nM	dTRIM37	10	28.4	294.7	8.7
1	1	DMSO	WT	14	65.73	274.34	2.29		2	1	500 nM	WT	14	15.23	259.93	2.78		3	1	500 nM	dTRIM37	14	44.54	298.84	9.24
1	1	DMSO	WT	18	94.89	270.83	2.28		2	1	500 nM	WT	18	16.74	263.79	2.5		3	1	500 nM	dTRIM37	18	49.82	306.02	8.85
1	1	DMSO	WT	22	117.4	268.71	2.09		2	1	500 nM	WT	22	17.82	266.79	2.37		3	1	500 nM	dTRIM37	22	54.02	301.89	8.35
1	1	DMSO	WT	26	102.19	278.63	2.31		2	1	500 nM	WT	26	18.72	261.47	2.41		3	1	500 nM	dTRIM37	26	60.87	304.17	8.66
1	1	DMSO	WT	30	134.7	282.22	2.41		2	1	500 nM	WT	30	19.69	258.66	2.22		3	1	500 nM	dTRIM37	30	60.43	296.72	8.99
1	1	DMSO	WT	34	157.94	277.98	2.76		2	1	500 nM	WT	34	20.33	259.74	2.42		3	1	500 nM	dTRIM37	34	62.21	299.19	9.27
1	1	DMSO	WT	38	160.37	288.79	2.53		2	1	500 nM	WT	38	20.68	258.47	2.13		3	1	500 nM	dTRIM37	38	61.97	297.7	8.67
1	1	DMSO	WT	42	183.06	296.34	2.2		2	1	500 nM	WT	42	22.67	262.82	2.43		3	1	500 nM	dTRIM37	42	66.24	291.86	8.64
1	1	DMSO	WT	46	186.07	294.69	2.28		2	1	500 nM	WT	46	22.41	261.91	2.22		3	1	500 nM	dTRIM37	46	74.35	296.01	8.93
1	1	DMSO	WT	50	193.76	296.41	2.06		2	1	500 nM	WT	50	22.61	266.14	2.29		3	1	500 nM	dTRIM37	50	76.93	287.55	8.76
1	1	DMSO	WT	54	220.34	290.64	2.06		2	1	500 nM	WT	54	24.07	263.01	2.03		3	1	500 nM	dTRIM37	54	79.49	290.64	9.07
1	1	DMSO	WT	58	239.07	294.93	2.4		2	1	500 nM	WT	58	25.21	258.91	2.44		3	1	500 nM	dTRIM37	58	76.33	271.98	9.23
1	1	DMSO	WT	62	239.54	289.3	2.21		2	1	500 nM	WT	62	25.59	257.09	2.57		3	1	500 nM	dTRIM37	62	80.96	269.73	9.23
1	1	DMSO	WT	66	246.61	297.14	2.61		2	1	500 nM	WT	66	26.28	254.76	2.22		3	1	500 nM	dTRIM37	66	81.6	272.18	9.58
1	1	DMSO	WT	70	248.24	298.64	2.29		2	1	500 nM	WT	70	27.13	257.58	2.37		3	1	500 nM	dTRIM37	70	78.61	270.02	8.85
1	1	DMSO	WT	74	266.22	293.31	2.49		2	1	500 nM	WT	74	27.76	251.47	2.67		3	1	500 nM	dTRIM37	74	83.22	275.88	9.66
1	1	DMSO	WT	78	275.1	287.96	2.17		2	1	500 nM	WT	78	29.1	254.73	2.39		3	1	500 nM	dTRIM37	78	81.36	284.7	9.85
1	1	DMSO	WT	82	272.81	304.35	2.54		2	1	500 nM	WT	82	27.93	254.32	2.16		3	1	500 nM	dTRIM37	82	85.42	276.69	9.17
1	1	DMSO	WT	86	271.41	301.66	1.97		2	1	500 nM	WT	86	29.53	249.64	2.48		3	1	500 nM	dTRIM37	86	89.53	285.03	9.39
1	1	DMSO	WT	90	286.68	290.23	1.98		2	1	500 nM	WT	90	30.2	240.9	2		3	1	500 nM	dTRIM37	90	94.42	287.73	9.12
1	1	DMSO	WT	94	295.4	303.18	2.25		2	1	500 nM	WT	94	30.8	228.07	2.4		3	1	500 nM	dTRIM37	94	98.58	290.57	9.19
1	1	DMSO	WT	98	296.1	297.38	2.32		2	1	500 nM	WT	98	30.99	240.93	2.27		3	1	500 nM	dTRIM37	98	103.91	295.89	9.05
1	2	DMSO	WT	0	259.3	275.91	7.89		2	2	500 nM	WT	0	357.28	32.38	2.11		3	2	500 nM	dTRIM37	0	912.51	198.07	2.01
1	2	DMSO	WT	4	258.78	296.87	7.48		2	2	500 nM	WT	4	362.77	34.45	2.23		3	2	500 nM	dTRIM37	4	902.38	199.7	2.2
1	2	DMSO	WT	8	260.08	286.75	7.82		2	2	500 nM	WT	8	374.36	32.92	2.45		3	2	500 nM	dTRIM37	8	887.51	209.25	2.19
1	2	DMSO	WT	10	12.18	285.62	7.38		2	2	500 nM	WT	10	5.4	32.13	2.23		3	2	500 nM	dTRIM37	10	6.78	206.46	2.57
1	2	DMSO	WT	14	35.56	280.91	7.24		2	2	500 nM	WT	14	8.69	33.06	2.33		3	2	500 nM	dTRIM37	14	11.76	207.01	2.3
1	2	DMSO	WT	18	50.52	274.6	6.7		2	2	500 nM	WT	18	10.88	33.39	2.55		3	2	500 nM	dTRIM37	18	16.03	200.68	2.84
1	2	DMSO	WT	22	67.29	295.43	7.81		2	2	500 nM	WT	22	12.23	36.32	2.49		3	2	500 nM	dTRIM37	22	18.28	203.81	2.43
1	2	DMSO	WT	26	77.96	277.96	6.9		2	2	500 nM	WT	26	13.26	34.14	2.47		3	2	500 nM	dTRIM37	26	20.64	201.46	2.19
1	2	DMSO	WT	30	88.24	284.3	6.73		2	2	500 nM	WT	30	14.67	31.99	2.3		3	2	500 nM	dTRIM37	30	21.67	205.03	2.2
1	2	DMSO	WT	34	100.85	286.33	7.25		2	2	500 nM	WT	34	16.62	33	2.27		3	2	500 nM	dTRIM37	34	22.75	199.35	2.08
1	2	DMSO	WT	38	106.44	273.71	6.4		2	2	500 nM	WT	38	18.26	31.29	2.48		3	2	500 nM	dTRIM37	38	24.57	198.67	2.4
1	2	DMSO	WT	42	112.61	273.03	6.13		2	2	500 nM	WT	42	18.83	30.58	2.56		3	2	500 nM	dTRIM37	42	26.06	201.67	2.25
1	2	DMSO	WT	46	117.36	275.38	5.88		2	2	500 nM	WT	46	19.64	29.21	2.6		3	2	500 nM	dTRIM37	46	28.85	201.62	2.25
1	2	DMSO	WT	50	126.12	249.98	5.9		2	2	500 nM	WT	50	21.05	30.92	2.43		3	2	500 nM	dTRIM37	50	30.53	195.8	2.06
1	2	DMSO	WT	54	133.23	264.83	7.19		2	2	500 nM	WT	54	21.75	29.66	2.32		3	2	500 nM	dTRIM37	54	33.08	196.82	2.43
1	2	DMSO	WT	58	135.32	271.82	6.76		2	2	500 nM	WT	58	22.45	31.2	2.35		3	2	500 nM	dTRIM37	58	36.27	190.58	2.53
1	2	DMSO	WT	62	143.6	276.6	6.65		2	2	500 nM	WT	62	23.01	30.92	2.45		3	2	500 nM	dTRIM37	62	35.17	188.9	2.39
1	2	DMSO	WT	66	146.62	273.45	6.77		2	2	500 nM	WT	66	22.96	30.34	2.47		3	2	500 nM	dTRIM37	66	36.34	188.39	2.21
1	2	DMSO	WT	70	150.44	273.86	6.72		2	2	500 nM	WT	70	23.2	30.78	2.14		3	2	500 nM	dTRIM37	70	35.24	188.56	2.58
1	2	DMSO	WT	74	154.17	272.69	6.64		2	2	500 nM	WT	74	24.03	28.3	2.23		3	2	500 nM	dTRIM37	74	37.26	193.12	2.07
1	2	DMSO	WT	78	157.05	277.29	5.56		2	2	500 nM	WT	78	25.05	29.98	2.45		3	2	500 nM	dTRIM37	78	40.36	197.12	2.39
1	2	DMSO	WT	82	162.38	284.68	5.57		2	2	500 nM	WT	82	25.69	30.54	2.45		3	2	500 nM	dTRIM37	82	42.34	196.26	2.34
1	2	DMSO	WT	86	168.2	275.34	4.88		2	2	500 nM	WT	86	26.35	30.57	2.17		3	2	500 nM	dTRIM37	86	42.57	195.38	2.17
1	2	DMSO	WT	90	167.35	281.66	4.41		2	2	500 nM	WT	90	26.66	30.74	2.3		3	2	500 nM	dTRIM37	90	42.31	194.14	2.45
1	2	DMSO	WT	94	171.83	264.06	4.27		2	2	500 nM	WT	94	26.41	30.66	2.13		3	2	500 nM	dTRIM37	94	41.96	196.32	2.1
1	2	DMSO	WT	98	173.99	265.47	4.35		2	2	500 nM	WT	98	26.88	30.29	2.33		3	2	500 nM	dTRIM37	98	42.46	192.45	2.12
1	3	DMSO	WT	0	256.81	336.71	2.51		2	3	500 nM	WT	0	708.73	641.77	2.78		3	3	500 nM	dTRIM37	0	705.94	64.78	3.99
1	3	DMSO	WT	4	262.99	333.48	2.28		2	3	500 nM	WT	4	724.95	649.19	2.41		3	3	500 nM	dTRIM37	4	705.37	66.39	4.31
1	3	DMSO	WT	8	263.24	329.84	2.35		2	3	500 nM	WT	8	725.45	668.07	2.68		3	3	500 nM	dTRIM37	8	703.85	65.45	3.48
1	3	DMSO	WT	10	14.15	342.94	2.25		2	3	500 nM	WT	10	14.96	666.49	2.98		3	3	500 nM	dTRIM37	10	7.4	64.08	4.32
1	3	DMSO	WT	14	36.62	320.37	2.42		2	3	500 nM	WT	14	24.68	664.37	2.79		3	3	500 nM	dTRIM37	14	12.42	65.65	4
1	3	DMSO	WT	18	51.09	335.69	2.6		2	3	500 nM	WT	18	27.7	674.44	2.6		3	3	500 nM	dTRIM37	18	15.1	64.24	4.3
1	3	DMSO	WT	22	64.62	337.16	2.05		2	3	500 nM	WT	22	30.48	688.35	2.45		3	3	500 nM	dTRIM37	22	16.9	63.65	3.72
1	3	DMSO	WT	26	76.77	347.96	2.5		2	3	500 nM	WT	26	32.4	702.51	2.5		3	3	500 nM	dTRIM37	26	19.31	63.54	4.14
1	3	DMSO	WT	30	81.29	330.15	2.29		2	3	500 nM	WT	30	33.79	663.21	2.63		3	3	500 nM	dTRIM37	30	21.74	63.91	4.49
1	3	DMSO	WT	34	92.26	341.05	2.44		2	3	500 nM	WT	34	34.23	644.72	2.87		3	3	500 nM	dTRIM37	34	23.5	62.08	4.21
1	3	DMSO	WT	38	99.35	342.43	2.71		2	3	500 nM	WT	38	35.2	646.55	2.71		3	3	500 nM	dTRIM37	38	24.4	62.17	3.89
1	3	DMSO	WT	42	104.8	343.51	2.37		2	3	500 nM	WT	42	36.87	650.71	2.69		3	3	500 nM	dTRIM37	42	26.33	60.68	4.18
1	3	DMSO	WT	46	111.79	345.64	2.29		2	3	500 nM	WT	46	37.72	635.15	2.56		3	3	500 nM	dTRIM37	46	27.39	63.19	4.1
1	3	DMSO	WT	50	117.63	339.63	2.69		2	3	500 nM	WT	50	38.44	676.63	2.68		3	3	500 nM	dTRIM37	50	28.35	61.18	3.73
1	3	DMSO	WT	54	117.46	341.91	1.87		2	3	500 nM	WT	54	38.57	652.83	2.53		3	3	500 nM	dTRIM37	54	29.93	62.54	4.21
1	3	DMSO	WT	58	118.96	338.23	2.21		2	3	500 nM	WT	58	41.58	700.12	3		3	3	500 nM	dTRIM37	58	30.76	62.7	4.3
1	3	DMSO	WT	62	124.71	333.33	2.27		2	3	500 nM	WT	62	41.75	668.53	2.71		3	3	500 nM	dTRIM37	62	31.69	62.91	3.92
1	3	DMSO	WT	66	124.93	322.46	2.18		2	3	500 nM	WT	66	42.06	682.13	2.15		3	3	500 nM	dTRIM37	66	33.16	62.9	4.03
1	3	DMSO	WT	70	128.68	331.29	2.39		2	3	500 nM	WT	70	42.8	663.2	2.46		3	3	500 nM	dTRIM37	70	34.52	63.01	3.94
1	3	DMSO	WT	74	131.35	313.39	2.58		2	3	500 nM	WT	74	42.9	660.58	2.32		3	3	500 nM	dTRIM37	74	34.85	61.96	3.72
1	3	DMSO	WT	78	135.36	314.52	2.73		2	3	500 nM	WT	78	44.91	657.62	2.62		3	3	500 nM	dTRIM37	78	35.85	61.49	3.99
1	3	DMSO	WT	82	137.21	324.13	2.05		2	3	500 nM	WT	82	46.09	669.24	2.79		3	3	500 nM	dTRIM37	82	36.86	60.85	4.04
1	3	DMSO	WT	86	138.17	326.19	2.28		2	3	500 nM	WT	86	45.86	679.67	2.74		3	3	500 nM	dTRIM37	86	39.04	60.72	3.85
1	3	DMSO	WT	90	135.81	311.06	2.2		2	3	500 nM	WT	90	46.58	664.86	2.72		3	3	500 nM	dTRIM37	90	39.66	62.63	4.31
1	3	DMSO	WT	94	142.95	326.94	2.12		2	3	500 nM	WT	94	47.1	667.92	2.45		3	3	500 nM	dTRIM37	94	40.33	60.83	3.6
1	3	DMSO	WT	98	146.44	303.02	2.42		2	3	500 nM	WT	98	48.73	669.78	2.77		3	3	500 nM	dTRIM37	98	40.83	60.52	4.24
1	4	DMSO	WT	0	265.23	168.45	2.33		2	4	500 nM	WT	0	159.79	117.76	2.28		3	4	500 nM	dTRIM37	0	1400.11	298.52	16.94
1	4	DMSO	WT	4	259.83	163.06	2.11		2	4	500 nM	WT	4	157.77	120.78	2.49		3	4	500 nM	dTRIM37	4	1405.86	298.12	16.28
1	4	DMSO	WT	8	267.72	173.05	2.49		2	4	500 nM	WT	8	158.24	119.78	2.23		3	4	500 nM	dTRIM37	8	1401.81	298.09	16.35
1	4	DMSO	WT	10	14.54	163.06	2.37		2	4	500 nM	WT	10	4.87	114.2	2.03		3	4	500 nM	dTRIM37	10	23.06	292.71	16.52
1	4	DMSO	WT	14	35.63	165.53	2.15		2	4	500 nM	WT	14	7.03	115.53	2.52		3	4	500 nM	dTRIM37	14	32.18	292.32	16.08
1	4	DMSO	WT	18	51.43	169.78	2.59		2	4	500 nM	WT	18	7.1	118.31	2.05		3	4	500 nM	dTRIM37	18	38.75	297.07	16.71
1	4	DMSO	WT	22	64.23	170.13	2.33		2	4	500 nM	WT	22	8.52	116.27	2.29		3	4	500 nM	dTRIM37	22	42.48	299.52	17.62
1	4	DMSO	WT	26	75.86	171.17	2.12		2	4	500 nM	WT	26	8.84	118.3	2.36		3	4	500 nM	dTRIM37	26	43.21	293.25	16.4
1	4	DMSO	WT	30	84.49	168.42	2.03		2	4	500 nM	WT	30	9.92	117.17	2.38		3	4	500 nM	dTRIM37	30	45.86	288.83	15.94
1	4	DMSO	WT	34	87.05	166.92	2.42		2	4	500 nM	WT	34	9.51	116.56	2.12		3	4	500 nM	dTRIM37	34	46.53	291.05	16.23
1	4	DMSO	WT	38	96.15	169.3	2.25		2	4	500 nM	WT	38	10.35	116.98	2.32		3	4	500 nM	dTRIM37	38	47.02	290.85	16.78
1	4	DMSO	WT	42	104.68	166.64	2.03		2	4	500 nM	WT	42	10.41	119.01	2.35		3	4	500 nM	dTRIM37	42	47.63	287.6	17.07
1	4	DMSO	WT	46	111.02	169.39	2.3		2	4	500 nM	WT	46	10.69	116.98	2.12		3	4	500 nM	dTRIM37	46	47.81	294.88	15.63
1	4	DMSO	WT	50	119.54	167.43	2.59		2	4	500 nM	WT	50	10.5	117.64	1.97		3	4	500 nM	dTRIM37	50	52.74	293.15	16.9
1	4	DMSO	WT	54	126.6	169.36	2.11		2	4	500 nM	WT	54	11.91	117.79	2.38		3	4	500 nM	dTRIM37	54	51.79	294.73	16.68
1	4	DMSO	WT	58	130.86	170.46	2.72		2	4	500 nM	WT	58	12.26	118.55	2.64		3	4	500 nM	dTRIM37	58	51.83	293.58	15.54
1	4	DMSO	WT	62	132.37	167.32	2.06		2	4	500 nM	WT	62	12.22	116.53	2.66		3	4	500 nM	dTRIM37	62	54.58	288.6	15.99
1	4	DMSO	WT	66	131.53	162.31	2.29		2	4	500 nM	WT	66	12.24	115.55	2.24		3	4	500 nM	dTRIM37	66	55.87	289.35	16.71
1	4	DMSO	WT	70	140.57	165.1	2.44		2	4	500 nM	WT	70	12.48	116.82	2.38		3	4	500 nM	dTRIM37	70	56.17	289.68	16.27
1	4	DMSO	WT	74	147.25	164.95	2.37		2	4	500 nM	WT	74	12.79	116	2.5		3	4	500 nM	dTRIM37	74	57.52	286.76	16.92
1	4	DMSO	WT	78	146.35	163	2.35		2	4	500 nM	WT	78	12.64	115.89	2.2		3	4	500 nM	dTRIM37	78	58.38	292.05	16.53
1	4	DMSO	WT	82	155.56	158.2	2.06		2	4	500 nM	WT	82	13.22	115.99	2.61		3	4	500 nM	dTRIM37	82	58.02	286.6	16.44
1	4	DMSO	WT	86	161.11	160.12	2.13		2	4	500 nM	WT	86	13.68	115.33	2.51		3	4	500 nM	dTRIM37	86	58.87	284	16.14
1	4	DMSO	WT	90	170.93	159.49	2.74		2	4	500 nM	WT	90	13.42	116.25	2.26		3	4	500 nM	dTRIM37	90	58.32	287.59	16.17
1	4	DMSO	WT	94	173.86	164.2	2.45		2	4	500 nM	WT	94	13.55	114.91	2.4		3	4	500 nM	dTRIM37	94	60.22	285.48	16.48
1	4	DMSO	WT	98	173.31	161	2.51		2	4	500 nM	WT	98	13.66	115.24	2.36		3	4	500 nM	dTRIM37	98	60.85	284.22	16.36
1	5	DMSO	WT	0	529.65	466.82	2.31		2	5	500 nM	WT	0	202.55	126.32	2.16		3	5	500 nM	dTRIM37	0	1271.38	311.06	1.84
1	5	DMSO	WT	4	562.16	493.23	2.59		2	5	500 nM	WT	4	203.02	126.64	2.53		3	5	500 nM	dTRIM37	4	1273.71	311.93	2.08
1	5	DMSO	WT	8	560.22	499.7	2.51		2	5	500 nM	WT	8	208.42	126.17	2.58		3	5	500 nM	dTRIM37	8	1273.7	312.92	2.77
1	5	DMSO	WT	10	28.58	493.89	2.15		2	5	500 nM	WT	10	4.39	124.59	2.2		3	5	500 nM	dTRIM37	10	16.41	307.68	2.37
1	5	DMSO	WT	14	73.57	499.43	2.38		2	5	500 nM	WT	14	7.88	126.88	2.68		3	5	500 nM	dTRIM37	14	33.07	313.89	2.64
1	5	DMSO	WT	18	100.55	511.52	2.11		2	5	500 nM	WT	18	9.17	125.87	2.36		3	5	500 nM	dTRIM37	18	39	315.3	2.52
1	5	DMSO	WT	22	125.94	505.43	2.45		2	5	500 nM	WT	22	10.72	127.16	2.36		3	5	500 nM	dTRIM37	22	42.11	315.22	2.43
1	5	DMSO	WT	26	149.71	506.21	2.34		2	5	500 nM	WT	26	11.46	124.14	2.49		3	5	500 nM	dTRIM37	26	44.63	309.52	1.98
1	5	DMSO	WT	30	167.33	502.84	2.35		2	5	500 nM	WT	30	12.49	125.34	2.43		3	5	500 nM	dTRIM37	30	47.97	316.17	2.6
1	5	DMSO	WT	34	174.79	500.51	2.36		2	5	500 nM	WT	34	12.69	125.22	2.41		3	5	500 nM	dTRIM37	34	49.85	311.37	2.62
1	5	DMSO	WT	38	192.22	472.05	2.12		2	5	500 nM	WT	38	12.95	122.96	2.42		3	5	500 nM	dTRIM37	38	51.63	307.88	2.27
1	5	DMSO	WT	42	208.6	474.14	2.56		2	5	500 nM	WT	42	14.25	122.59	2.46		3	5	500 nM	dTRIM37	42	53.99	306.9	2.17
1	5	DMSO	WT	46	222.38	462.49	2.3		2	5	500 nM	WT	46	14.37	122.98	2.77		3	5	500 nM	dTRIM37	46	56.19	301.88	2.3
1	5	DMSO	WT	50	224.05	431.79	2.15		2	5	500 nM	WT	50	14.16	121.74	2.43		3	5	500 nM	dTRIM37	50	58.04	300.51	2.25
1	5	DMSO	WT	54	239.87	444.67	2.75		2	5	500 nM	WT	54	14.69	122.66	2.28		3	5	500 nM	dTRIM37	54	60.57	292.22	2.07
1	5	DMSO	WT	58	256.42	437.44	2.69		2	5	500 nM	WT	58	15.42	122.32	2.51		3	5	500 nM	dTRIM37	58	62.99	291	2.54
1	5	DMSO	WT	62	253.73	441.35	2.13		2	5	500 nM	WT	62	15.81	124.41	2.28		3	5	500 nM	dTRIM37	62	63.49	290.68	2.36
1	5	DMSO	WT	66	258.98	428.78	2.19		2	5	500 nM	WT	66	17.24	125.24	2.81		3	5	500 nM	dTRIM37	66	64.89	290.6	2.19
1	5	DMSO	WT	70	263.79	446.36	2.59		2	5	500 nM	WT	70	17.63	124.72	2.15		3	5	500 nM	dTRIM37	70	67.52	294.29	2.41
1	5	DMSO	WT	74	275.94	445.97	2.56		2	5	500 nM	WT	74	16.93	123.24	2.36		3	5	500 nM	dTRIM37	74	67.82	291.48	2.07
1	5	DMSO	WT	78	284.04	484.35	2.3		2	5	500 nM	WT	78	18.56	119.31	2.77		3	5	500 nM	dTRIM37	78	69.01	293.99	2.17
1	5	DMSO	WT	82	297.18	481.28	2.4		2	5	500 nM	WT	82	18.27	114.66	2.62		3	5	500 nM	dTRIM37	82	71.15	292.56	2.29
1	5	DMSO	WT	86	300.28	484.01	2.45		2	5	500 nM	WT	86	18.32	117.25	2.36		3	5	500 nM	dTRIM37	86	72.2	293.59	2.09
1	5	DMSO	WT	90	310.1	485.09	2.43		2	5	500 nM	WT	90	18.76	119.03	2.83		3	5	500 nM	dTRIM37	90	72.81	291.37	2.14
1	5	DMSO	WT	94	314.98	497.49	2.08		2	5	500 nM	WT	94	19.39	114.31	2.37		3	5	500 nM	dTRIM37	94	73.49	290.98	2.26
1	5	DMSO	WT	98	304.94	492.78	2.19		2	5	500 nM	WT	98	20.01	114.53	2.48		3	5	500 nM	dTRIM37	98	74.37	290.45	2.44
1	6	DMSO	WT	0	256.22	369.74	2.49		2	6	500 nM	WT	0	788.01	959.18	2.82		3	6	500 nM	dTRIM37	0	1167.72	1071.03	2.29
1	6	DMSO	WT	4	276.57	377.19	2.35		2	6	500 nM	WT	4	785.04	968.45	2.7		3	6	500 nM	dTRIM37	4	1164.6	1072.27	2.29
1	6	DMSO	WT	8	281.85	385.25	2.35		2	6	500 nM	WT	8	784.57	955.06	3.08		3	6	500 nM	dTRIM37	8	1150.48	1066.01	2.49
1	6	DMSO	WT	10	12.37	359.73	2.37		2	6	500 nM	WT	10	22.98	734.71	2.95		3	6	500 nM	dTRIM37	10	20.35	1034.82	2.01
1	6	DMSO	WT	14	33.56	367.24	2.15		2	6	500 nM	WT	14	31.22	771.38	3.3		3	6	500 nM	dTRIM37	14	31.7	1046.73	2.77
1	6	DMSO	WT	18	51.47	372.75	2.36		2	6	500 nM	WT	18	33.34	777.41	2.83		3	6	500 nM	dTRIM37	18	34.64	1047.96	2.43
1	6	DMSO	WT	22	63.99	397.98	2.46		2	6	500 nM	WT	22	34.75	763.55	3.11		3	6	500 nM	dTRIM37	22	36.66	1048.5	2.27
1	6	DMSO	WT	26	76.65	407.48	2.16		2	6	500 nM	WT	26	34.95	786.68	3.1		3	6	500 nM	dTRIM37	26	38.89	1035.28	2.39
1	6	DMSO	WT	30	89	388.59	2.67		2	6	500 nM	WT	30	35.6	767.11	3.19		3	6	500 nM	dTRIM37	30	41.9	1053.77	2.01
1	6	DMSO	WT	34	95.26	378.61	2.29		2	6	500 nM	WT	34	36.92	747.33	3.1		3	6	500 nM	dTRIM37	34	43.03	1037.85	2.26
1	6	DMSO	WT	38	112.3	367.29	2.19		2	6	500 nM	WT	38	38	762.47	3.26		3	6	500 nM	dTRIM37	38	43.6	1026.87	2.06
1	6	DMSO	WT	42	117.16	386.21	2.56		2	6	500 nM	WT	42	38.56	770.07	2.99		3	6	500 nM	dTRIM37	42	43.31	1010.91	2.15
1	6	DMSO	WT	46	123.66	379.55	2.45		2	6	500 nM	WT	46	38.89	746.72	2.68		3	6	500 nM	dTRIM37	46	45.11	1005.41	2.69
1	6	DMSO	WT	50	131.42	351.78	2.11		2	6	500 nM	WT	50	39.37	765.54	3.08		3	6	500 nM	dTRIM37	50	46.54	986.68	2.33
1	6	DMSO	WT	54	136.89	355.31	1.98		2	6	500 nM	WT	54	39.45	783.9	3.07		3	6	500 nM	dTRIM37	54	46.28	988.04	2.21
1	6	DMSO	WT	58	144.35	340.83	2.42		2	6	500 nM	WT	58	40.41	768.07	3.4		3	6	500 nM	dTRIM37	58	49.27	1002.91	2.55
1	6	DMSO	WT	62	150.96	359.51	2.25		2	6	500 nM	WT	62	40.65	785.11	2.88		3	6	500 nM	dTRIM37	62	49.06	1023.18	2.37
1	6	DMSO	WT	66	144.46	367.8	2.26		2	6	500 nM	WT	66	41.07	769.7	2.94		3	6	500 nM	dTRIM37	66	50.49	1030.94	2.29
1	6	DMSO	WT	70	154.46	346.53	2.2		2	6	500 nM	WT	70	40.46	792.45	2.79		3	6	500 nM	dTRIM37	70	52.68	1044.98	2.01
1	6	DMSO	WT	74	152.39	331.93	2.13		2	6	500 nM	WT	74	41.71	777.72	3.45		3	6	500 nM	dTRIM37	74	53.17	1030.96	2.11
1	6	DMSO	WT	78	156.09	337.12	2.17		2	6	500 nM	WT	78	41	757.23	3.25		3	6	500 nM	dTRIM37	78	54.18	1037.11	1.94
1	6	DMSO	WT	82	154.2	347.06	2.16		2	6	500 nM	WT	82	41.46	743.58	3.75		3	6	500 nM	dTRIM37	82	55.33	1029.91	2.12
1	6	DMSO	WT	86	161.55	329.29	2.31		2	6	500 nM	WT	86	40.43	762.66	2.8		3	6	500 nM	dTRIM37	86	56.93	1034.65	2.03
1	6	DMSO	WT	90	160.56	306.43	2.46		2	6	500 nM	WT	90	42.38	746.34	3.1		3	6	500 nM	dTRIM37	90	58.78	1043.74	2.4
1	6	DMSO	WT	94	169.45	314.37	2.13		2	6	500 nM	WT	94	41.24	803.63	2.73		3	6	500 nM	dTRIM37	94	60.74	1048.63	2.67
1	6	DMSO	WT	98	165.47	327.11	2.33		2	6	500 nM	WT	98	42.86	772.96	2.88		3	6	500 nM	dTRIM37	98	62.71	1053.07	2.51
1	7	DMSO	WT	0	510.89	399.43	93.39		2	7	500 nM	WT	0	258.66	42.9	4.65		3	7	500 nM	dTRIM37	0	532.21	44.06	2.48
1	7	DMSO	WT	4	513.49	399.41	94.72		2	7	500 nM	WT	4	263.5	41.88	3.7		3	7	500 nM	dTRIM37	4	531.72	44.76	2.32
1	7	DMSO	WT	8	507.7	404.14	93.41		2	7	500 nM	WT	8	258.01	43.43	4.25		3	7	500 nM	dTRIM37	8	530.02	43.28	2.21
1	7	DMSO	WT	10	74.94	387.33	93.53		2	7	500 nM	WT	10	8.41	40.08	4.07		3	7	500 nM	dTRIM37	10	6.77	43.24	2.1
1	7	DMSO	WT	14	127.35	382.04	94.83		2	7	500 nM	WT	14	11.14	41.25	4.05		3	7	500 nM	dTRIM37	14	8.33	44.5	2.36
1	7	DMSO	WT	18	149.42	396.03	94.78		2	7	500 nM	WT	18	12.12	41.87	3.76		3	7	500 nM	dTRIM37	18	9.29	46.98	2.29
1	7	DMSO	WT	22	166.79	389.56	94.51		2	7	500 nM	WT	22	13.82	41.8	4.14		3	7	500 nM	dTRIM37	22	8.42	45.85	2.42
1	7	DMSO	WT	26	180.53	392.66	94.24		2	7	500 nM	WT	26	13.38	40.67	3.75		3	7	500 nM	dTRIM37	26	8.78	46.05	2.31
1	7	DMSO	WT	30	194.1	388.11	95.38		2	7	500 nM	WT	30	14.61	42.38	4.47		3	7	500 nM	dTRIM37	30	9.03	46.08	2.63
1	7	DMSO	WT	34	203.97	389.53	95.18		2	7	500 nM	WT	34	14.57	37.25	3.81		3	7	500 nM	dTRIM37	34	10.06	44.86	2.49
1	7	DMSO	WT	38	215.89	394.79	92.9		2	7	500 nM	WT	38	14.94	38.43	4.43		3	7	500 nM	dTRIM37	38	8.24	43.72	2.26
1	7	DMSO	WT	42	222.94	397.49	93.64		2	7	500 nM	WT	42	14.32	40.66	4.4		3	7	500 nM	dTRIM37	42	8.56	42.29	2.51
1	7	DMSO	WT	46	231.8	400.55	93.81		2	7	500 nM	WT	46	15.87	39.72	4.25		3	7	500 nM	dTRIM37	46	8.64	42.79	2.37
1	7	DMSO	WT	50	236.98	396.9	94.75		2	7	500 nM	WT	50	14.78	41.36	4.19		3	7	500 nM	dTRIM37	50	8.59	43.61	2.19
1	7	DMSO	WT	54	237.86	399.07	95.05		2	7	500 nM	WT	54	15.67	37.95	3.65		3	7	500 nM	dTRIM37	54	9.2	43.51	2.29
1	7	DMSO	WT	58	244.69	398.59	94.76		2	7	500 nM	WT	58	16.14	36.4	4.4		3	7	500 nM	dTRIM37	58	7.76	41.09	1.71
1	7	DMSO	WT	62	249.61	392.95	93.44		2	7	500 nM	WT	62	16.9	36.92	3.64		3	7	500 nM	dTRIM37	62	8.39	41.49	2.17
1	7	DMSO	WT	66	253.57	392.34	93.34		2	7	500 nM	WT	66	16.32	37.01	4.36		3	7	500 nM	dTRIM37	66	8.6	40.48	2.32
1	7	DMSO	WT	70	257.88	390.83	92.95		2	7	500 nM	WT	70	16.34	33.89	3.86		3	7	500 nM	dTRIM37	70	8.88	40.78	2.41
1	7	DMSO	WT	74	260.47	376.69	94.13		2	7	500 nM	WT	74	16.15	34.93	4.17		3	7	500 nM	dTRIM37	74	8.76	40.9	2.45
1	7	DMSO	WT	78	267.66	386.23	93.18		2	7	500 nM	WT	78	15.99	33.31	4.01		3	7	500 nM	dTRIM37	78	8.35	41.46	2.37
1	7	DMSO	WT	82	270.08	380.41	93.69		2	7	500 nM	WT	82	15.76	30.71	4.11		3	7	500 nM	dTRIM37	82	8.37	41.6	2.43
1	7	DMSO	WT	86	272.93	382.7	94.69		2	7	500 nM	WT	86	16.64	36.81	4.13		3	7	500 nM	dTRIM37	86	8.26	39.84	2.25
1	7	DMSO	WT	90	273.59	385.09	94.31		2	7	500 nM	WT	90	16.42	34.96	4.5		3	7	500 nM	dTRIM37	90	8.12	39.95	2.61
1	7	DMSO	WT	94	277.01	375.94	94.05		2	7	500 nM	WT	94	16.52	38.21	4.07		3	7	500 nM	dTRIM37	94	8.61	39.79	2.51
1	7	DMSO	WT	98	281.9	373.75	93.35		2	7	500 nM	WT	98	17.39	39	4.22		3	7	500 nM	dTRIM37	98	8.28	39.17	2.23
1	8	DMSO	WT	0	255.2	249.13	2.24		2	8	500 nM	WT	0	1056.65	85.78	2.22		3	8	500 nM	dTRIM37	0	1756.18	1310.61	2.16
1	8	DMSO	WT	4	238.01	253.23	2.31		2	8	500 nM	WT	4	1086.76	79.44	2.36		3	8	500 nM	dTRIM37	4	1765.52	1323.13	1.88
1	8	DMSO	WT	8	240.29	245.9	2.63		2	8	500 nM	WT	8	1052.18	82.12	2.3		3	8	500 nM	dTRIM37	8	1730.48	1319.51	2.37
1	8	DMSO	WT	10	6.77	240.12	1.81		2	8	500 nM	WT	10	27.7	77.67	1.92		3	8	500 nM	dTRIM37	10	20.09	1296.7	2.15
1	8	DMSO	WT	14	22.31	248.19	2.62		2	8	500 nM	WT	14	41.14	79.24	2.44		3	8	500 nM	dTRIM37	14	41.33	1292.62	2.33
1	8	DMSO	WT	18	32.96	238.48	1.86		2	8	500 nM	WT	18	41.96	83.11	2.64		3	8	500 nM	dTRIM37	18	53.54	1283.07	2.18
1	8	DMSO	WT	22	42.83	251.29	2.48		2	8	500 nM	WT	22	44.88	78.86	2.19		3	8	500 nM	dTRIM37	22	60.76	1277.24	2.18
1	8	DMSO	WT	26	54.39	244.45	2.56		2	8	500 nM	WT	26	46.65	79.02	2.1		3	8	500 nM	dTRIM37	26	67.75	1286.97	2.35
1	8	DMSO	WT	30	65.73	235.98	2.44		2	8	500 nM	WT	30	48.96	77.69	2.35		3	8	500 nM	dTRIM37	30	70.63	1278	2.08
1	8	DMSO	WT	34	70.23	247.36	2.16		2	8	500 nM	WT	34	49.79	80.51	2.34		3	8	500 nM	dTRIM37	34	75.1	1282.56	2.3
1	8	DMSO	WT	38	80.66	243.36	2.19		2	8	500 nM	WT	38	50.07	80.87	2.18		3	8	500 nM	dTRIM37	38	77.49	1262.98	2.39
1	8	DMSO	WT	42	88.02	248.2	2.61		2	8	500 nM	WT	42	52.02	81.76	2.56		3	8	500 nM	dTRIM37	42	80.49	1316.05	2.83
1	8	DMSO	WT	46	97.86	235.18	2.22		2	8	500 nM	WT	46	52.67	79.82	2.32		3	8	500 nM	dTRIM37	46	83.4	1339.6	2.42
1	8	DMSO	WT	50	101.75	229.31	2.51		2	8	500 nM	WT	50	53.08	83.75	2.31		3	8	500 nM	dTRIM37	50	86.56	1353.57	2.55
1	8	DMSO	WT	54	106.59	241.12	2.47		2	8	500 nM	WT	54	54.26	84.72	2.33		3	8	500 nM	dTRIM37	54	86.96	1327.26	2.24
1	8	DMSO	WT	58	113.27	218.79	2.22		2	8	500 nM	WT	58	55.37	83.92	2.17		3	8	500 nM	dTRIM37	58	90.34	1294.13	2.13
1	8	DMSO	WT	62	116.45	225.09	2.25		2	8	500 nM	WT	62	56.83	86.66	2.64		3	8	500 nM	dTRIM37	62	93.83	1308.22	2.44
1	8	DMSO	WT	66	114.6	250.64	2.33		2	8	500 nM	WT	66	58	86.67	2.25		3	8	500 nM	dTRIM37	66	94.39	1300.11	1.79
1	8	DMSO	WT	70	121.8	238.24	2.52		2	8	500 nM	WT	70	57.13	87.93	2.34		3	8	500 nM	dTRIM37	70	97.38	1324.5	2.43
1	8	DMSO	WT	74	126.86	236.17	2.21		2	8	500 nM	WT	74	57.18	88.49	2.63		3	8	500 nM	dTRIM37	74	98.17	1327.51	2.27
1	8	DMSO	WT	78	130.39	234.91	2.37		2	8	500 nM	WT	78	58.73	79.02	2.31		3	8	500 nM	dTRIM37	78	100.53	1328.38	2.25
1	8	DMSO	WT	82	138.77	238.38	2.28		2	8	500 nM	WT	82	61.32	79.02	2.43		3	8	500 nM	dTRIM37	82	104.09	1320.84	2.48
1	8	DMSO	WT	86	141.85	239.47	2.38		2	8	500 nM	WT	86	58.27	82.99	2.23		3	8	500 nM	dTRIM37	86	105.51	1322.16	2.16
1	8	DMSO	WT	90	140.24	237.91	2.37		2	8	500 nM	WT	90	58.06	78.17	2.32		3	8	500 nM	dTRIM37	90	111.71	1313.94	2.01
1	8	DMSO	WT	94	143.44	242.66	2.4		2	8	500 nM	WT	94	60.49	76.25	2.47		3	8	500 nM	dTRIM37	94	119.73	1341.28	2.35
1	8	DMSO	WT	98	143.01	242.05	2.41		2	8	500 nM	WT	98	60.99	79.61	2.52		3	8	500 nM	dTRIM37	98	116.91	1325.18	2.31
1	9	DMSO	WT	0	350.94	158.14	2.35		2	9	500 nM	WT	0	259.52	28.98	2.31		3	9	500 nM	dTRIM37	0	1544.68	45.14	2.22
1	9	DMSO	WT	4	353.15	162.08	2.19		2	9	500 nM	WT	4	261	26.09	2.15		3	9	500 nM	dTRIM37	4	1555.72	44.68	2.31
1	9	DMSO	WT	8	351.35	162.15	2.55		2	9	500 nM	WT	8	261.01	26.15	2.55		3	9	500 nM	dTRIM37	8	1550.66	45.68	2.36
1	9	DMSO	WT	10	8.8	159.71	2.65		2	9	500 nM	WT	10	6.96	25.03	2.37		3	9	500 nM	dTRIM37	10	30.71	43.63	2.24
1	9	DMSO	WT	14	24.41	161.19	2.39		2	9	500 nM	WT	14	9.88	26.22	2.53		3	9	500 nM	dTRIM37	14	61.16	45.19	2.93
1	9	DMSO	WT	18	34.38	154.64	2.06		2	9	500 nM	WT	18	10.94	26.54	2.58		3	9	500 nM	dTRIM37	18	68.24	44.66	2.35
1	9	DMSO	WT	22	44.43	155.06	2.43		2	9	500 nM	WT	22	11.18	25.85	2.57		3	9	500 nM	dTRIM37	22	70.02	44.91	2.59
1	9	DMSO	WT	26	52.95	155.8	1.97		2	9	500 nM	WT	26	11.21	24.7	2.25		3	9	500 nM	dTRIM37	26	71.65	43.59	2.37
1	9	DMSO	WT	30	59.5	150.36	2.49		2	9	500 nM	WT	30	12.11	26.14	2.45		3	9	500 nM	dTRIM37	30	75.24	44.06	2.47
1	9	DMSO	WT	34	70.32	157.07	2.7		2	9	500 nM	WT	34	13.42	23.87	2.59		3	9	500 nM	dTRIM37	34	79.66	43.46	2.41
1	9	DMSO	WT	38	77.86	158.9	2.61		2	9	500 nM	WT	38	13.52	21.74	2.51		3	9	500 nM	dTRIM37	38	83.09	43.45	1.94
1	9	DMSO	WT	42	82.67	156.48	2.21		2	9	500 nM	WT	42	13.75	22.25	2.48		3	9	500 nM	dTRIM37	42	87.67	43.89	2.37
1	9	DMSO	WT	46	88.48	157.79	2.42		2	9	500 nM	WT	46	13.69	24.01	2.45		3	9	500 nM	dTRIM37	46	92.92	43.37	2.47
1	9	DMSO	WT	50	89.19	152.98	2.21		2	9	500 nM	WT	50	13.85	23.46	2.19		3	9	500 nM	dTRIM37	50	90.48	43.95	2.12
1	9	DMSO	WT	54	95.84	155	2.31		2	9	500 nM	WT	54	14.08	23.67	2.49		3	9	500 nM	dTRIM37	54	91.8	42.37	2.37
1	9	DMSO	WT	58	108.4	153.66	2.43		2	9	500 nM	WT	58	14.32	22.67	2.33		3	9	500 nM	dTRIM37	58	92.79	42.84	2.28
1	9	DMSO	WT	62	112	156.99	2.81		2	9	500 nM	WT	62	15.03	22.11	2.6		3	9	500 nM	dTRIM37	62	93.27	43.92	2.33
1	9	DMSO	WT	66	113.31	155.48	2.21		2	9	500 nM	WT	66	14.53	22.27	2.34		3	9	500 nM	dTRIM37	66	94.73	44.02	2.57
1	9	DMSO	WT	70	116.39	149.88	2.31		2	9	500 nM	WT	70	15.22	21.61	2.2		3	9	500 nM	dTRIM37	70	95.97	43.03	2.52
1	9	DMSO	WT	74	115.44	153.2	2.28		2	9	500 nM	WT	74	15.09	23.17	2.22		3	9	500 nM	dTRIM37	74	98.24	42.15	2.22
1	9	DMSO	WT	78	115.92	148.36	2.49		2	9	500 nM	WT	78	15.29	20.42	2.2		3	9	500 nM	dTRIM37	78	100.19	42.14	2.09
1	9	DMSO	WT	82	120.36	146.38	2.18		2	9	500 nM	WT	82	14.78	20.35	2.26		3	9	500 nM	dTRIM37	82	101.35	40.88	1.73
1	9	DMSO	WT	86	125.34	130.27	2.17		2	9	500 nM	WT	86	16.1	21.8	2.58		3	9	500 nM	dTRIM37	86	106.22	43.11	2.31
1	9	DMSO	WT	90	138.42	129.08	2.12		2	9	500 nM	WT	90	16.16	21.6	2.39		3	9	500 nM	dTRIM37	90	112	43.84	2.54
1	9	DMSO	WT	94	141.71	141.14	2.55		2	9	500 nM	WT	94	15.64	22.27	2.17		3	9	500 nM	dTRIM37	94	115.99	42.52	2.06
1	9	DMSO	WT	98	140.92	135.33	2.1		2	9	500 nM	WT	98	16.18	23.31	2.48		3	9	500 nM	dTRIM37	98	117.15	41.99	2.33
1	10	DMSO	WT	0	318.61	156.11	2.03		2	10	500 nM	WT	0	260.69	120.82	2.54		3	10	500 nM	dTRIM37	0	1427.83	309.91	2
1	10	DMSO	WT	4	318.52	154.42	2.03		2	10	500 nM	WT	4	266.85	113.01	2.38		3	10	500 nM	dTRIM37	4	1403.72	296.71	2.5
1	10	DMSO	WT	8	321.51	151.55	2.67		2	10	500 nM	WT	8	268.67	119.53	2.65		3	10	500 nM	dTRIM37	8	1400.72	292.25	2.03
1	10	DMSO	WT	10	9.58	136.67	2.28		2	10	500 nM	WT	10	5.75	109.45	2.26		3	10	500 nM	dTRIM37	10	19.06	277.59	2.8
1	10	DMSO	WT	14	27.83	139.6	1.94		2	10	500 nM	WT	14	9.48	113.61	2.34		3	10	500 nM	dTRIM37	14	24.35	288.3	2.44
1	10	DMSO	WT	18	41.9	131.48	2.3		2	10	500 nM	WT	18	11.67	120.23	2.39		3	10	500 nM	dTRIM37	18	26.17	287.36	2.34
1	10	DMSO	WT	22	49.46	132.96	2.36		2	10	500 nM	WT	22	12.74	113.03	2.72		3	10	500 nM	dTRIM37	22	30.73	272.96	2.24
1	10	DMSO	WT	26	58.15	147.91	2.29		2	10	500 nM	WT	26	12.55	117.58	2.42		3	10	500 nM	dTRIM37	26	34.77	271.24	2.31
1	10	DMSO	WT	30	75.17	139.55	2.64		2	10	500 nM	WT	30	13.94	112.18	2.32		3	10	500 nM	dTRIM37	30	34.94	268.86	2.46
1	10	DMSO	WT	34	78.03	138.06	2.34		2	10	500 nM	WT	34	13.72	111.73	2.53		3	10	500 nM	dTRIM37	34	37.48	258.41	2.41
1	10	DMSO	WT	38	85.7	137.88	2.64		2	10	500 nM	WT	38	14.52	112.59	2.27		3	10	500 nM	dTRIM37	38	36.21	269.26	2.33
1	10	DMSO	WT	42	93.02	135	1.93		2	10	500 nM	WT	42	14.98	115.96	2.49		3	10	500 nM	dTRIM37	42	41.87	270.25	2.42
1	10	DMSO	WT	46	103.41	117.87	2.36		2	10	500 nM	WT	46	14.88	116.67	2.15		3	10	500 nM	dTRIM37	46	43.44	277.81	2.58
1	10	DMSO	WT	50	109.07	117.68	2.13		2	10	500 nM	WT	50	15.31	118.28	2.21		3	10	500 nM	dTRIM37	50	38.18	277.06	2.29
1	10	DMSO	WT	54	113.87	113.83	2.05		2	10	500 nM	WT	54	15.66	115.42	2.15		3	10	500 nM	dTRIM37	54	35.93	282.95	2.39
1	10	DMSO	WT	58	119.8	129.04	2.61		2	10	500 nM	WT	58	16.67	117.04	2.69		3	10	500 nM	dTRIM37	58	36.13	276.61	2.31
1	10	DMSO	WT	62	126.93	110.9	2.29		2	10	500 nM	WT	62	16.77	113.57	2.4		3	10	500 nM	dTRIM37	62	37.3	267.26	2.17
1	10	DMSO	WT	66	133.23	120.73	2.53		2	10	500 nM	WT	66	17.9	111.04	2.27		3	10	500 nM	dTRIM37	66	36.77	257.46	2.3
1	10	DMSO	WT	70	135.84	126.85	2.51		2	10	500 nM	WT	70	17.68	112.43	2.1		3	10	500 nM	dTRIM37	70	37.05	264.48	2.4
1	10	DMSO	WT	74	146.02	110.12	2.45		2	10	500 nM	WT	74	18.09	115.29	2.46		3	10	500 nM	dTRIM37	74	42.99	258.41	2.5
1	10	DMSO	WT	78	147.94	113.79	2.13		2	10	500 nM	WT	78	19.86	117.82	2.76		3	10	500 nM	dTRIM37	78	44.69	273.24	2.37
1	10	DMSO	WT	82	155.94	115.13	2.29		2	10	500 nM	WT	82	19.56	120.82	2.22		3	10	500 nM	dTRIM37	82	41.42	281.01	2.52
1	10	DMSO	WT	86	153.95	119.81	2.01		2	10	500 nM	WT	86	19.86	114.98	2.39		3	10	500 nM	dTRIM37	86	42.5	269.82	2.71
1	10	DMSO	WT	90	157.32	114.83	2		2	10	500 nM	WT	90	20.08	117.13	2.41		3	10	500 nM	dTRIM37	90	45.4	273.14	2.47
1	10	DMSO	WT	94	158	113.6	2.62		2	10	500 nM	WT	94	19.62	112.18	2.13		3	10	500 nM	dTRIM37	94	43.89	265.53	2.65
1	10	DMSO	WT	98	163.54	115.09	2.4		2	10	500 nM	WT	98	20.35	109.21	2.21		3	10	500 nM	dTRIM37	98	42.28	257.31	2.47
1	11	DMSO	WT	0	373.89	159.48	2.54		2	11	500 nM	WT	0	719.56	41.82	2.15		3	11	500 nM	dTRIM37	0	1532.37	98.53	2.55
1	11	DMSO	WT	4	380.57	143.6	2.57		2	11	500 nM	WT	4	734.01	42.54	2.19		3	11	500 nM	dTRIM37	4	1550.37	96.15	2.4
1	11	DMSO	WT	8	388.3	158.59	2.07		2	11	500 nM	WT	8	734.09	41.61	2.41		3	11	500 nM	dTRIM37	8	1538.52	96.94	2.39
1	11	DMSO	WT	10	6.92	148.52	2.23		2	11	500 nM	WT	10	26.76	42.79	2.43		3	11	500 nM	dTRIM37	10	13.29	87.38	2.5
1	11	DMSO	WT	14	23.52	148.93	2.22		2	11	500 nM	WT	14	37.59	42.46	2.35		3	11	500 nM	dTRIM37	14	21.34	92.04	2.12
1	11	DMSO	WT	18	38.53	139.69	2.32		2	11	500 nM	WT	18	40.09	42.9	1.97		3	11	500 nM	dTRIM37	18	28.37	89.59	2.48
1	11	DMSO	WT	22	49.08	146.04	2.26		2	11	500 nM	WT	22	39.87	43.7	2.65		3	11	500 nM	dTRIM37	22	30	86.56	2.36
1	11	DMSO	WT	26	59.21	150.18	2.05		2	11	500 nM	WT	26	40.86	40.72	2		3	11	500 nM	dTRIM37	26	35.76	86.3	2.59
1	11	DMSO	WT	30	70.21	151.61	2.28		2	11	500 nM	WT	30	42.5	43.46	2.42		3	11	500 nM	dTRIM37	30	35.55	87.37	2.33
1	11	DMSO	WT	34	80.13	156.12	2.28		2	11	500 nM	WT	34	44.57	42.38	2.2		3	11	500 nM	dTRIM37	34	34.52	90.69	2.13
1	11	DMSO	WT	38	88.37	152.06	2.34		2	11	500 nM	WT	38	44.92	39.57	2.22		3	11	500 nM	dTRIM37	38	35.59	91.4	2.6
1	11	DMSO	WT	42	96.71	155.25	2.56		2	11	500 nM	WT	42	45.97	38.85	2.48		3	11	500 nM	dTRIM37	42	37.88	90.5	2.3
1	11	DMSO	WT	46	102.36	153.91	2.34		2	11	500 nM	WT	46	44.07	38.3	2.38		3	11	500 nM	dTRIM37	46	38.42	92.29	2.38
1	11	DMSO	WT	50	107.97	152.96	2.09		2	11	500 nM	WT	50	47.21	35.92	2.23		3	11	500 nM	dTRIM37	50	42.54	94.13	2.57
1	11	DMSO	WT	54	116.76	152.72	2.43		2	11	500 nM	WT	54	48.52	31.15	2.24		3	11	500 nM	dTRIM37	54	46.52	92.94	2
1	11	DMSO	WT	58	123.65	152.3	2.44		2	11	500 nM	WT	58	47.76	39.01	2.29		3	11	500 nM	dTRIM37	58	48.29	88.97	2.43
1	11	DMSO	WT	62	124.98	149.83	2.09		2	11	500 nM	WT	62	48.81	44.47	2.39		3	11	500 nM	dTRIM37	62	52.56	90.23	2.3
1	11	DMSO	WT	66	125.51	145.1	2.32		2	11	500 nM	WT	66	43.89	45.46	2.38		3	11	500 nM	dTRIM37	66	59.26	89.98	2.4
1	11	DMSO	WT	70	130.43	138.45	2.52		2	11	500 nM	WT	70	40.33	44.11	2.38		3	11	500 nM	dTRIM37	70	66.11	90.25	2.29
1	11	DMSO	WT	74	140.08	147.4	1.82		2	11	500 nM	WT	74	42.58	44.26	2.57		3	11	500 nM	dTRIM37	74	64.88	88.97	2.33
1	11	DMSO	WT	78	132.45	141.14	2.73		2	11	500 nM	WT	78	42.7	45	2.48		3	11	500 nM	dTRIM37	78	63.99	90.12	2.37
1	11	DMSO	WT	82	140.06	142.78	2.21		2	11	500 nM	WT	82	46.3	43.64	2.38		3	11	500 nM	dTRIM37	82	67.42	88.72	2.26
1	11	DMSO	WT	86	145.89	135.67	2.22		2	11	500 nM	WT	86	42.75	43.99	2.32		3	11	500 nM	dTRIM37	86	68.9	90.2	1.94
1	11	DMSO	WT	90	148.37	136.26	2.23		2	11	500 nM	WT	90	43.79	44.24	2.27		3	11	500 nM	dTRIM37	90	69.77	91.47	2.39
1	11	DMSO	WT	94	155.92	142.34	2.25		2	11	500 nM	WT	94	43.7	50.27	2.6		3	11	500 nM	dTRIM37	94	72.11	90.22	2.01
1	11	DMSO	WT	98	150.01	134.5	2.41		2	11	500 nM	WT	98	44.19	44.55	2.17		3	11	500 nM	dTRIM37	98	74.04	91.8	2.04
1	12	DMSO	WT	0	171.84	92.72	2.1		2	12	500 nM	WT	0	89.09	14.9	2.08		3	1	DMSO	dTRIM37	0	112.53	51.44	2.75
1	12	DMSO	WT	4	168.57	91.55	2.2		2	12	500 nM	WT	4	98.52	14.62	2.17		3	1	DMSO	dTRIM37	4	111.41	50.02	1.94
1	12	DMSO	WT	8	183.93	92.16	2.31		2	12	500 nM	WT	8	99.7	14.29	2.1		3	1	DMSO	dTRIM37	8	114.4	47.43	2.19
1	12	DMSO	WT	10	5.5	91.43	2.65		2	12	500 nM	WT	10	3.88	13.25	2.5		3	1	DMSO	dTRIM37	10	7.26	46.36	2.37
1	12	DMSO	WT	14	13.68	91.05	2.49		2	12	500 nM	WT	14	3.85	13.66	2.34		3	1	DMSO	dTRIM37	14	16.45	50.7	2.36
1	12	DMSO	WT	18	19.1	90.41	2.2		2	12	500 nM	WT	18	4.27	12.95	2.36		3	1	DMSO	dTRIM37	18	24.92	49.17	2.81
1	12	DMSO	WT	22	25.71	91.96	2.49		2	12	500 nM	WT	22	4.42	14.2	2.69		3	1	DMSO	dTRIM37	22	29.56	47.39	2.41
1	12	DMSO	WT	26	30.67	93.45	2.18		2	12	500 nM	WT	26	4.24	12.59	2.4		3	1	DMSO	dTRIM37	26	34	48.04	2.68
1	12	DMSO	WT	30	35.17	92.36	1.96		2	12	500 nM	WT	30	3.48	12.8	2.12		3	1	DMSO	dTRIM37	30	36.79	48.8	2.57
1	12	DMSO	WT	34	40.27	95.18	2.59		2	12	500 nM	WT	34	4.47	13.22	2.21		3	1	DMSO	dTRIM37	34	38.38	48.85	2.73
1	12	DMSO	WT	38	44.38	93.59	2.63		2	12	500 nM	WT	38	4.42	13.78	2.48		3	1	DMSO	dTRIM37	38	42.04	50.35	2.06
1	12	DMSO	WT	42	45.6	94.01	2.38		2	12	500 nM	WT	42	4.77	13.94	2.69		3	1	DMSO	dTRIM37	42	46.57	48.1	2.12
1	12	DMSO	WT	46	47.89	93.5	2.29		2	12	500 nM	WT	46	4.18	12.8	2.36		3	1	DMSO	dTRIM37	46	46.63	49.03	2.22
1	12	DMSO	WT	50	52.17	91.33	2.25		2	12	500 nM	WT	50	4.26	13.23	2.37		3	1	DMSO	dTRIM37	50	48.45	47.97	2.17
1	12	DMSO	WT	54	55.78	91.18	2.45		2	12	500 nM	WT	54	4.31	13.2	2.38		3	1	DMSO	dTRIM37	54	53.1	46.59	2.33
1	12	DMSO	WT	58	59.74	92.61	2.58		2	12	500 nM	WT	58	4.23	13.82	2.26		3	1	DMSO	dTRIM37	58	54.3	47.96	2.26
1	12	DMSO	WT	62	63.95	88.38	1.87		2	12	500 nM	WT	62	4.29	13.24	2.48		3	1	DMSO	dTRIM37	62	57.61	47.16	2.78
1	12	DMSO	WT	66	68.32	88.61	2.4		2	12	500 nM	WT	66	4.13	13.37	2.32		3	1	DMSO	dTRIM37	66	57.83	48.8	2.28
1	12	DMSO	WT	70	71.17	88.53	2.52		2	12	500 nM	WT	70	4.45	13.4	2.25		3	1	DMSO	dTRIM37	70	58.9	47.69	2.09
1	12	DMSO	WT	74	70.9	88.24	2.14		2	12	500 nM	WT	74	4.43	13.32	2.53		3	1	DMSO	dTRIM37	74	63.64	46.72	2.09
1	12	DMSO	WT	78	69.96	88.02	2.33		2	12	500 nM	WT	78	4.57	13.84	2.5		3	1	DMSO	dTRIM37	78	67.92	48.89	2.7
1	12	DMSO	WT	82	67.81	91.8	2.46		2	12	500 nM	WT	82	3.88	13.44	2.07		3	1	DMSO	dTRIM37	82	70.2	47.54	2.76
1	12	DMSO	WT	86	75.31	94.26	2.25		2	12	500 nM	WT	86	4.74	14.32	2.46		3	1	DMSO	dTRIM37	86	71.69	48.6	2.36
1	12	DMSO	WT	90	70.47	93.4	2.1		2	12	500 nM	WT	90	4.55	14.22	2.57		3	1	DMSO	dTRIM37	90	68.78	46.93	2.29
1	12	DMSO	WT	94	72.38	87.89	2.42		2	12	500 nM	WT	94	4.63	14	2.4		3	1	DMSO	dTRIM37	94	70.9	47.46	2.18
1	12	DMSO	WT	98	65.62	87.14	2.26		2	12	500 nM	WT	98	4.07	12.52	2.21		3	1	DMSO	dTRIM37	98	74.32	48.43	2.53
1	1	500 nM	WT	0	847.92	31.17	2.48		2	13	500 nM	WT	0	478.22	182.88	4.63		3	2	DMSO	dTRIM37	0	130.59	65.03	2
1	1	500 nM	WT	4	843.56	30.79	2.34		2	13	500 nM	WT	4	486.01	183.08	4.7		3	2	DMSO	dTRIM37	4	134.14	65.03	2.16
1	1	500 nM	WT	8	836.58	31.38	2.17		2	13	500 nM	WT	8	463.04	180.68	4.66		3	2	DMSO	dTRIM37	8	126.13	66.54	2.59
1	1	500 nM	WT	10	22.4	27.06	2.33		2	13	500 nM	WT	10	7.1	176.6	4.37		3	2	DMSO	dTRIM37	10	3.97	66.08	2.45
1	1	500 nM	WT	14	40.47	27.98	2.83		2	13	500 nM	WT	14	9.41	178.94	4.57		3	2	DMSO	dTRIM37	14	11.22	64.25	2.37
1	1	500 nM	WT	18	44.92	27.24	2.35		2	13	500 nM	WT	18	9.91	180.16	4.73		3	2	DMSO	dTRIM37	18	16.17	64.55	2.08
1	1	500 nM	WT	22	51.26	28.32	2.73		2	13	500 nM	WT	22	10.46	179.94	4.15		3	2	DMSO	dTRIM37	22	21.05	65.17	2.59
1	1	500 nM	WT	26	53.98	28.56	2.4		2	13	500 nM	WT	26	10.48	177.87	3.83		3	2	DMSO	dTRIM37	26	24.42	64.15	2.43
1	1	500 nM	WT	30	57.96	27.48	2.21		2	13	500 nM	WT	30	11.49	180.07	4.77		3	2	DMSO	dTRIM37	30	28.67	64.69	2.12
1	1	500 nM	WT	34	61.37	26.55	2.13		2	13	500 nM	WT	34	12.25	179.51	4.86		3	2	DMSO	dTRIM37	34	33.12	64.63	2.48
1	1	500 nM	WT	38	63.67	27.98	2.57		2	13	500 nM	WT	38	11.94	179.17	4.87		3	2	DMSO	dTRIM37	38	36.25	63.96	2.35
1	1	500 nM	WT	42	62.98	27.33	2.05		2	13	500 nM	WT	42	12.98	180.02	4.76		3	2	DMSO	dTRIM37	42	41.4	62.82	2.54
1	1	500 nM	WT	46	70.11	29.72	2.65		2	13	500 nM	WT	46	12.32	177.94	4.12		3	2	DMSO	dTRIM37	46	43.25	60.71	2.14
1	1	500 nM	WT	50	70.73	29.77	2.28		2	13	500 nM	WT	50	13.04	179.01	4.52		3	2	DMSO	dTRIM37	50	44.28	62.89	2.32
1	1	500 nM	WT	54	75.05	29.21	2.87		2	13	500 nM	WT	54	14.02	179.61	4.56		3	2	DMSO	dTRIM37	54	46.35	61.62	2.29
1	1	500 nM	WT	58	76.44	28.12	2.15		2	13	500 nM	WT	58	13.99	177.42	4.5		3	2	DMSO	dTRIM37	58	49.29	60.01	2.19
1	1	500 nM	WT	62	77.27	30.45	2.55		2	13	500 nM	WT	62	13.11	177.05	4.3		3	2	DMSO	dTRIM37	62	50.78	60.31	2.66
1	1	500 nM	WT	66	80.47	28.77	2.17		2	13	500 nM	WT	66	15.43	177.01	4.85		3	2	DMSO	dTRIM37	66	49.8	59.65	2.49
1	1	500 nM	WT	70	80.42	28.7	2.3		2	13	500 nM	WT	70	14.93	175.88	4.43		3	2	DMSO	dTRIM37	70	51.89	58.56	2.21
1	1	500 nM	WT	74	79.27	29.36	2.39		2	13	500 nM	WT	74	15.05	175.61	4.55		3	2	DMSO	dTRIM37	74	51.64	60.09	2.38
1	1	500 nM	WT	78	80.2	28.58	2.21		2	13	500 nM	WT	78	14.88	175.74	4.59		3	2	DMSO	dTRIM37	78	58.68	58.68	2.34
1	1	500 nM	WT	82	86.27	29.08	2.4		2	13	500 nM	WT	82	15.53	175.67	4.72		3	2	DMSO	dTRIM37	82	57.52	58.84	2.51
1	1	500 nM	WT	86	91.35	29.29	1.96		2	13	500 nM	WT	86	15.99	173.33	4.69		3	2	DMSO	dTRIM37	86	56.66	58.62	2.56
1	1	500 nM	WT	90	93.91	30.41	2.54		2	13	500 nM	WT	90	15.91	175.11	4.71		3	2	DMSO	dTRIM37	90	55.74	58.21	2.3
1	1	500 nM	WT	94	92.1	30.54	2.47		2	13	500 nM	WT	94	15.62	174.64	4.68		3	2	DMSO	dTRIM37	94	55.92	59.37	2.58
1	1	500 nM	WT	98	92.28	30.55	2.44		2	13	500 nM	WT	98	16.42	174.42	4.9		3	2	DMSO	dTRIM37	98	58.24	57.88	2.41
1	2	500 nM	WT	0	367.93	166.23	2		2	1	DMSO	dTRIM37	0	17.33	21.59	2.32		3	3	DMSO	dTRIM37	0	144.5	38.89	1.67
1	2	500 nM	WT	4	376.16	167.23	2.96		2	1	DMSO	dTRIM37	4	18.34	22.41	2.31		3	3	DMSO	dTRIM37	4	146.14	39.93	2.32
1	2	500 nM	WT	8	366.08	166.7	2.42		2	1	DMSO	dTRIM37	8	18.19	22	2.19		3	3	DMSO	dTRIM37	8	147.91	39.93	2.27
1	2	500 nM	WT	10	4.22	159.72	2.31		2	1	DMSO	dTRIM37	10	3.21	21.42	2.83		3	3	DMSO	dTRIM37	10	4.7	38.24	1.96
1	2	500 nM	WT	14	9.14	162.85	2.26		2	1	DMSO	dTRIM37	14	4.25	21.74	2.6		3	3	DMSO	dTRIM37	14	11.33	39.24	1.94
1	2	500 nM	WT	18	11.73	165.49	2.44		2	1	DMSO	dTRIM37	18	4.71	21.4	2.35		3	3	DMSO	dTRIM37	18	16.92	40.53	1.94
1	2	500 nM	WT	22	15.61	161.68	2.47		2	1	DMSO	dTRIM37	22	5.47	21.05	2.43		3	3	DMSO	dTRIM37	22	21.47	39.62	1.86
1	2	500 nM	WT	26	18.44	158.09	2.61		2	1	DMSO	dTRIM37	26	5.76	21.17	2.29		3	3	DMSO	dTRIM37	26	26.49	37.4	2.22
1	2	500 nM	WT	30	20.96	156.3	2.83		2	1	DMSO	dTRIM37	30	6.95	21.87	2.44		3	3	DMSO	dTRIM37	30	29.64	38.3	2.31
1	2	500 nM	WT	34	24.46	152.86	2.77		2	1	DMSO	dTRIM37	34	7.29	20.71	2.02		3	3	DMSO	dTRIM37	34	35.01	38.98	2.59
1	2	500 nM	WT	38	24.98	152.92	2.3		2	1	DMSO	dTRIM37	38	7.76	21.24	2.49		3	3	DMSO	dTRIM37	38	37.41	35.98	1.67
1	2	500 nM	WT	42	28.13	154.36	2.66		2	1	DMSO	dTRIM37	42	8.13	21	2.35		3	3	DMSO	dTRIM37	42	40.55	37.27	2.39
1	2	500 nM	WT	46	29.65	155.46	2.2		2	1	DMSO	dTRIM37	46	8.65	21.89	2.27		3	3	DMSO	dTRIM37	46	44.25	37.12	2.47
1	2	500 nM	WT	50	32.63	160.24	2.48		2	1	DMSO	dTRIM37	50	8.58	21	2.27		3	3	DMSO	dTRIM37	50	48.06	36.68	2.9
1	2	500 nM	WT	54	33.26	160.74	2.31		2	1	DMSO	dTRIM37	54	8.79	21.41	2.5		3	3	DMSO	dTRIM37	54	48.81	35.39	2.52
1	2	500 nM	WT	58	35.3	160.58	2.49		2	1	DMSO	dTRIM37	58	8.89	21.37	2.33		3	3	DMSO	dTRIM37	58	51.97	35.17	2.57
1	2	500 nM	WT	62	36.69	158.66	2.46		2	1	DMSO	dTRIM37	62	9.45	21.3	2.6		3	3	DMSO	dTRIM37	62	55.35	33.49	2.44
1	2	500 nM	WT	66	38.33	159.84	2.69		2	1	DMSO	dTRIM37	66	9.66	21.55	2.45		3	3	DMSO	dTRIM37	66	58.24	35.71	2.24
1	2	500 nM	WT	70	39.98	155.29	2.54		2	1	DMSO	dTRIM37	70	9.58	21.64	2.42		3	3	DMSO	dTRIM37	70	61.1	34.96	2.32
1	2	500 nM	WT	74	39.83	155.34	2.03		2	1	DMSO	dTRIM37	74	9.79	21.21	2.63		3	3	DMSO	dTRIM37	74	62.3	29.99	2.02
1	2	500 nM	WT	78	41.11	159.83	2.17		2	1	DMSO	dTRIM37	78	10.18	20.92	2.72		3	3	DMSO	dTRIM37	78	64.06	37.66	2.42
1	2	500 nM	WT	82	43.17	162.27	2.62		2	1	DMSO	dTRIM37	82	11.12	21.71	2.83		3	3	DMSO	dTRIM37	82	64.95	40.5	2.51
1	2	500 nM	WT	86	44.13	160.68	2.52		2	1	DMSO	dTRIM37	86	10.59	21.25	2.61		3	3	DMSO	dTRIM37	86	66.89	37.41	2.4
1	2	500 nM	WT	90	45.65	161.99	2.49		2	1	DMSO	dTRIM37	90	10.65	20.96	2.32		3	3	DMSO	dTRIM37	90	69.99	40.71	2.16
1	2	500 nM	WT	94	47.24	164.57	2.44		2	1	DMSO	dTRIM37	94	11.01	20.34	2.43		3	3	DMSO	dTRIM37	94	68.32	38.32	1.99
1	2	500 nM	WT	98	50.38	163.77	2.7		2	1	DMSO	dTRIM37	98	11.18	21.58	2.42		3	3	DMSO	dTRIM37	98	69.43	34.7	2.46
1	3	500 nM	WT	0	3272.57	3441.64	2.74		2	2	DMSO	dTRIM37	0	24.13	55.26	2.08		3	4	DMSO	dTRIM37	0	309.11	52.71	3.8
1	3	500 nM	WT	4	3187.61	3315.15	2.33		2	2	DMSO	dTRIM37	4	24.79	57.4	2.31		3	4	DMSO	dTRIM37	4	302.44	51.4	3.81
1	3	500 nM	WT	8	3153.61	3288.05	2.5		2	2	DMSO	dTRIM37	8	23.37	56.65	2.19		3	4	DMSO	dTRIM37	8	314.96	52.75	4.26
1	3	500 nM	WT	10	78.57	3108.8	2.32		2	2	DMSO	dTRIM37	10	3.19	52.68	2.39		3	4	DMSO	dTRIM37	10	6.92	51.08	4.42
1	3	500 nM	WT	14	144.22	3264.48	2.48		2	2	DMSO	dTRIM37	14	4.3	52.85	2.6		3	4	DMSO	dTRIM37	14	18.92	51.31	3.89
1	3	500 nM	WT	18	167.68	3194.03	2.44		2	2	DMSO	dTRIM37	18	5.82	57.52	2.67		3	4	DMSO	dTRIM37	18	29.06	55.88	4.01
1	3	500 nM	WT	22	184.3	3160.42	2.43		2	2	DMSO	dTRIM37	22	5.64	57.67	2.16		3	4	DMSO	dTRIM37	22	37.67	58.35	4.67
1	3	500 nM	WT	26	193.17	3034.71	2.47		2	2	DMSO	dTRIM37	26	6.73	56.65	2.35		3	4	DMSO	dTRIM37	26	44.59	59.45	3.91
1	3	500 nM	WT	30	200.09	3008.44	2.41		2	2	DMSO	dTRIM37	30	7.72	58.18	2.45		3	4	DMSO	dTRIM37	30	53.09	58.75	3.98
1	3	500 nM	WT	34	205.07	2936	2.45		2	2	DMSO	dTRIM37	34	7.98	57.3	2.48		3	4	DMSO	dTRIM37	34	58.66	58.35	4.1
1	3	500 nM	WT	38	208.33	2959.43	2.4		2	2	DMSO	dTRIM37	38	7.95	58.28	2.3		3	4	DMSO	dTRIM37	38	63.86	60.21	3.76
1	3	500 nM	WT	42	215.89	3032.75	2.43		2	2	DMSO	dTRIM37	42	8.84	55.77	2.51		3	4	DMSO	dTRIM37	42	69.05	59.23	4.28
1	3	500 nM	WT	46	221.51	2983.72	2.45		2	2	DMSO	dTRIM37	46	9.34	59.53	2.2		3	4	DMSO	dTRIM37	46	75.52	58.47	4.17
1	3	500 nM	WT	50	231.56	3068.85	2.86		2	2	DMSO	dTRIM37	50	9.72	60.32	2.14		3	4	DMSO	dTRIM37	50	80.84	56.35	4.51
1	3	500 nM	WT	54	234.86	3088.22	2.45		2	2	DMSO	dTRIM37	54	10.63	58.31	2.87		3	4	DMSO	dTRIM37	54	83.43	54.55	4.07
1	3	500 nM	WT	58	236.37	3009.38	2.7		2	2	DMSO	dTRIM37	58	10	56.38	2.11		3	4	DMSO	dTRIM37	58	83.31	51.88	4.27
1	3	500 nM	WT	62	237.9	2933.22	2.85		2	2	DMSO	dTRIM37	62	10.31	57.68	2.45		3	4	DMSO	dTRIM37	62	87.62	49.78	4.04
1	3	500 nM	WT	66	240.68	2872.63	2.66		2	2	DMSO	dTRIM37	66	10.62	56.26	2.21		3	4	DMSO	dTRIM37	66	93.06	48.09	3.91
1	3	500 nM	WT	70	238.39	2689.21	3.02		2	2	DMSO	dTRIM37	70	11.14	60.84	2.34		3	4	DMSO	dTRIM37	70	102.07	47.22	4.47
1	3	500 nM	WT	74	239.42	2589.79	2.6		2	2	DMSO	dTRIM37	74	11.84	58.62	2.51		3	4	DMSO	dTRIM37	74	104.74	50.03	4.4
1	3	500 nM	WT	78	244.88	2692.83	2.3		2	2	DMSO	dTRIM37	78	12.17	60.52	2.4		3	4	DMSO	dTRIM37	78	104.9	49.12	3.99
1	3	500 nM	WT	82	250.52	2755.87	2.33		2	2	DMSO	dTRIM37	82	12.32	59.59	2.23		3	4	DMSO	dTRIM37	82	107.08	53.88	4.6
1	3	500 nM	WT	86	251.7	2707.49	2.59		2	2	DMSO	dTRIM37	86	12.62	58.38	2.4		3	4	DMSO	dTRIM37	86	109.53	51.78	4.48
1	3	500 nM	WT	90	255.5	2681.89	2.68		2	2	DMSO	dTRIM37	90	12.65	60.05	2.25		3	4	DMSO	dTRIM37	90	107.06	53.42	4.13
1	3	500 nM	WT	94	261.26	2767.96	2.2		2	2	DMSO	dTRIM37	94	13.29	60.31	2.59		3	4	DMSO	dTRIM37	94	113.47	49.82	4.17
1	3	500 nM	WT	98	268.2	2671.36	2.52		2	2	DMSO	dTRIM37	98	13.56	55.75	2.6		3	4	DMSO	dTRIM37	98	114.76	47.4	4.17
1	4	500 nM	WT	0	1032.01	1170.97	2.4		2	3	DMSO	dTRIM37	0	24.13	55.26	2.08		3	5	DMSO	dTRIM37	0	207.05	113.1	2.32
1	4	500 nM	WT	4	1053.89	1184.39	2.47		2	3	DMSO	dTRIM37	4	24.79	57.4	2.31		3	5	DMSO	dTRIM37	4	200.24	112.34	2.1
1	4	500 nM	WT	8	1102.01	1223.83	2.46		2	3	DMSO	dTRIM37	8	23.37	56.65	2.19		3	5	DMSO	dTRIM37	8	204.47	114.9	2.33
1	4	500 nM	WT	10	44.15	1169.39	2.51		2	3	DMSO	dTRIM37	10	3.19	52.68	2.39		3	5	DMSO	dTRIM37	10	8.15	107.39	2.21
1	4	500 nM	WT	14	70.66	1222.95	2.11		2	3	DMSO	dTRIM37	14	4.3	52.85	2.6		3	5	DMSO	dTRIM37	14	20.56	110.01	2.24
1	4	500 nM	WT	18	77.83	1228.26	2.19		2	3	DMSO	dTRIM37	18	5.82	57.52	2.67		3	5	DMSO	dTRIM37	18	30.11	108.14	2.78
1	4	500 nM	WT	22	81.18	1217.59	2.59		2	3	DMSO	dTRIM37	22	5.64	57.67	2.16		3	5	DMSO	dTRIM37	22	37.32	106.11	2.44
1	4	500 nM	WT	26	83.29	1214.76	2.28		2	3	DMSO	dTRIM37	26	6.73	56.65	2.35		3	5	DMSO	dTRIM37	26	43.32	103.78	1.93
1	4	500 nM	WT	30	86.07	1231.21	2.24		2	3	DMSO	dTRIM37	30	7.72	58.18	2.45		3	5	DMSO	dTRIM37	30	48.73	102.74	2.67
1	4	500 nM	WT	34	89.78	1222.47	2.6		2	3	DMSO	dTRIM37	34	7.98	57.3	2.48		3	5	DMSO	dTRIM37	34	55.77	104.69	2.73
1	4	500 nM	WT	38	92.51	1250.76	2.61		2	3	DMSO	dTRIM37	38	7.95	58.28	2.3		3	5	DMSO	dTRIM37	38	58.31	102.09	2.31
1	4	500 nM	WT	42	95.38	1247.22	2.63		2	3	DMSO	dTRIM37	42	8.84	55.77	2.51		3	5	DMSO	dTRIM37	42	63.97	97.8	2.28
1	4	500 nM	WT	46	93.58	1237.25	2.42		2	3	DMSO	dTRIM37	46	9.34	59.53	2.2		3	5	DMSO	dTRIM37	46	67.13	97.62	2.44
1	4	500 nM	WT	50	96.59	1241.52	2.41		2	3	DMSO	dTRIM37	50	9.72	60.32	2.14		3	5	DMSO	dTRIM37	50	71.86	98.6	2.22
1	4	500 nM	WT	54	97.92	1210.98	2.75		2	3	DMSO	dTRIM37	54	10.63	58.31	2.87		3	5	DMSO	dTRIM37	54	74.52	97.42	2.04
1	4	500 nM	WT	58	98.74	1274.25	2.39		2	3	DMSO	dTRIM37	58	10	56.38	2.11		3	5	DMSO	dTRIM37	58	77.14	101.77	2.37
1	4	500 nM	WT	62	99.53	1303.43	2.25		2	3	DMSO	dTRIM37	62	10.31	57.68	2.45		3	5	DMSO	dTRIM37	62	77.4	98.89	2.06
1	4	500 nM	WT	66	99.91	1233.37	2.11		2	3	DMSO	dTRIM37	66	10.62	56.26	2.21		3	5	DMSO	dTRIM37	66	83.86	96.66	2.43
1	4	500 nM	WT	70	98.33	1220.4	2.23		2	3	DMSO	dTRIM37	70	11.14	60.84	2.34		3	5	DMSO	dTRIM37	70	85.65	95.52	2.3
1	4	500 nM	WT	74	98.88	1227.18	2.55		2	3	DMSO	dTRIM37	74	11.84	58.62	2.51		3	5	DMSO	dTRIM37	74	87.66	96.37	2.44
1	4	500 nM	WT	78	99.57	1209.27	2.46		2	3	DMSO	dTRIM37	78	12.17	60.52	2.4		3	5	DMSO	dTRIM37	78	93.56	96.76	2.21
1	4	500 nM	WT	82	100.09	1208.09	2.56		2	3	DMSO	dTRIM37	82	12.32	59.59	2.23		3	5	DMSO	dTRIM37	82	98.94	97.58	2.33
1	4	500 nM	WT	86	103.07	1212.81	2.5		2	3	DMSO	dTRIM37	86	12.62	58.38	2.4		3	5	DMSO	dTRIM37	86	100.79	96.13	2.6
1	4	500 nM	WT	90	102.19	1213.25	2.23		2	3	DMSO	dTRIM37	90	12.65	60.05	2.25		3	5	DMSO	dTRIM37	90	101.12	94.12	2.2
1	4	500 nM	WT	94	104.37	1215.32	2.41		2	3	DMSO	dTRIM37	94	13.29	60.31	2.59		3	5	DMSO	dTRIM37	94	104.07	95.81	2.17
1	4	500 nM	WT	98	107.2	1226.07	2.61		2	3	DMSO	dTRIM37	98	13.56	55.75	2.6		3	5	DMSO	dTRIM37	98	106.76	95.67	2.26
1	5	500 nM	WT	0	2365.46	3095.12	2.9		2	4	DMSO	dTRIM37	0	26.7	19.81	2.36		3	6	DMSO	dTRIM37	0	470.8	553.03	2.51
1	5	500 nM	WT	4	2340.47	3110.28	3.25		2	4	DMSO	dTRIM37	4	27.79	20.57	2.38		3	6	DMSO	dTRIM37	4	466.04	552.5	2.08
1	5	500 nM	WT	8	2340.47	3116.07	3.08		2	4	DMSO	dTRIM37	8	27.79	20.18	2.16		3	6	DMSO	dTRIM37	8	460.93	551.84	2.25
1	5	500 nM	WT	10	63.83	2957.24	2.93		2	4	DMSO	dTRIM37	10	3.99	18.71	2.38		3	6	DMSO	dTRIM37	10	12.07	526.07	2.4
1	5	500 nM	WT	14	115.06	2923.72	3.65		2	4	DMSO	dTRIM37	14	5.5	19.4	2.28		3	6	DMSO	dTRIM37	14	39.25	547.66	2.52
1	5	500 nM	WT	18	130.34	2875.43	3.35		2	4	DMSO	dTRIM37	18	7.24	20.14	2.18		3	6	DMSO	dTRIM37	18	57.86	546.52	2.47
1	5	500 nM	WT	22	138.66	2914.82	3.13		2	4	DMSO	dTRIM37	22	8.51	19.98	2.46		3	6	DMSO	dTRIM37	22	75.47	552.34	2.23
1	5	500 nM	WT	26	154.27	2904.44	3.2		2	4	DMSO	dTRIM37	26	9.61	19.67	2.36		3	6	DMSO	dTRIM37	26	90.07	551.85	2.43
1	5	500 nM	WT	30	153.51	2875.73	2.99		2	4	DMSO	dTRIM37	30	10.09	19.49	2.39		3	6	DMSO	dTRIM37	30	102.39	546.63	2.28
1	5	500 nM	WT	34	152.68	2802.29	3.39		2	4	DMSO	dTRIM37	34	10.79	20.06	2.12		3	6	DMSO	dTRIM37	34	113.76	547.44	2.18
1	5	500 nM	WT	38	169.51	2741.78	3.14		2	4	DMSO	dTRIM37	38	11.32	19.35	1.97		3	6	DMSO	dTRIM37	38	125.47	556.94	2.29
1	5	500 nM	WT	42	179.62	2817.74	2.74		2	4	DMSO	dTRIM37	42	11.83	18.74	2.24		3	6	DMSO	dTRIM37	42	131.93	554.82	2.39
1	5	500 nM	WT	46	168.47	2842.41	3.07		2	4	DMSO	dTRIM37	46	12.45	18.44	1.85		3	6	DMSO	dTRIM37	46	140.62	551.75	2.51
1	5	500 nM	WT	50	179.65	2912.93	3.25		2	4	DMSO	dTRIM37	50	12.95	20.22	2.51		3	6	DMSO	dTRIM37	50	146.9	551.48	1.93
1	5	500 nM	WT	54	185.05	2881.43	3.42		2	4	DMSO	dTRIM37	54	13.43	18.89	2.12		3	6	DMSO	dTRIM37	54	154.27	550.19	2.55
1	5	500 nM	WT	58	179.21	2851.8	2.98		2	4	DMSO	dTRIM37	58	14.2	19.42	2.46		3	6	DMSO	dTRIM37	58	159.94	550.84	2.08
1	5	500 nM	WT	62	187.01	2861.44	3.3		2	4	DMSO	dTRIM37	62	14.67	19.23	2.43		3	6	DMSO	dTRIM37	62	167.61	549.73	2.2
1	5	500 nM	WT	66	187.95	2910.59	3.47		2	4	DMSO	dTRIM37	66	14.97	19.02	2.23		3	6	DMSO	dTRIM37	66	174.29	548.37	2.4
1	5	500 nM	WT	70	192.01	2848.85	3.09		2	4	DMSO	dTRIM37	70	16.03	20.13	2.41		3	6	DMSO	dTRIM37	70	181.11	554.33	2.51
1	5	500 nM	WT	74	189.99	2805.86	3.25		2	4	DMSO	dTRIM37	74	15.38	19.31	2.04		3	6	DMSO	dTRIM37	74	185.49	558.02	2.62
1	5	500 nM	WT	78	193.95	2835.68	2.76		2	4	DMSO	dTRIM37	78	15.96	19.23	2.36		3	6	DMSO	dTRIM37	78	189.56	555.33	2.32
1	5	500 nM	WT	82	187.52	2729.79	2.82		2	4	DMSO	dTRIM37	82	15.95	18.4	2.02		3	6	DMSO	dTRIM37	82	191.17	549.29	2.29
1	5	500 nM	WT	86	192.91	2766.06	3.24		2	4	DMSO	dTRIM37	86	15.58	17.68	1.91		3	6	DMSO	dTRIM37	86	193.75	544.87	2.45
1	5	500 nM	WT	90	203.73	2783.9	3.22		2	4	DMSO	dTRIM37	90	16.13	18.34	1.92		3	6	DMSO	dTRIM37	90	195.34	552.67	2.45
1	5	500 nM	WT	94	219.55	2794.03	3.48		2	4	DMSO	dTRIM37	94	16.47	18.57	2.12		3	6	DMSO	dTRIM37	94	201.89	550.56	2.45
1	5	500 nM	WT	98	228.02	2795.11	3.15		2	4	DMSO	dTRIM37	98	16.57	17.84	2.16		3	6	DMSO	dTRIM37	98	205.15	550.22	2.37
1	6	500 nM	WT	0	2287.2	923.72	2.16		2	5	DMSO	dTRIM37	0	36.05	54.55	2.12		3	7	DMSO	dTRIM37	0	88.65	81.25	2.32
1	6	500 nM	WT	4	2277.39	919.28	2.46		2	5	DMSO	dTRIM37	4	35.76	53.82	2.25		3	7	DMSO	dTRIM37	4	93.07	86	2.52
1	6	500 nM	WT	8	2285.13	973.48	2.52		2	5	DMSO	dTRIM37	8	36.7	53.28	2.34		3	7	DMSO	dTRIM37	8	91.31	79.78	2.44
1	6	500 nM	WT	10	22.56	889.91	2.6		2	5	DMSO	dTRIM37	10	2.91	53.31	2.68		3	7	DMSO	dTRIM37	10	6.97	85.21	2.23
1	6	500 nM	WT	14	40.31	848.97	2.27		2	5	DMSO	dTRIM37	14	3.83	53.98	2.52		3	7	DMSO	dTRIM37	14	14.69	81.89	2.11
1	6	500 nM	WT	18	50.34	879.18	2.32		2	5	DMSO	dTRIM37	18	4.44	51.43	2.16		3	7	DMSO	dTRIM37	18	18.63	81.72	2.28
1	6	500 nM	WT	22	59.78	835.33	2.43		2	5	DMSO	dTRIM37	22	6.51	52.76	2.39		3	7	DMSO	dTRIM37	22	22.53	79.38	2.12
1	6	500 nM	WT	26	65.56	874.06	2.4		2	5	DMSO	dTRIM37	26	6.45	52.83	1.9		3	7	DMSO	dTRIM37	26	24.68	78.96	1.78
1	6	500 nM	WT	30	74.08	886.63	2.42		2	5	DMSO	dTRIM37	30	8.02	53.02	2.24		3	7	DMSO	dTRIM37	30	27.37	77.82	2.16
1	6	500 nM	WT	34	77.62	871.32	2.35		2	5	DMSO	dTRIM37	34	8.79	53.12	2.31		3	7	DMSO	dTRIM37	34	30.43	77.28	2.06
1	6	500 nM	WT	38	84.35	883.14	2.59		2	5	DMSO	dTRIM37	38	9.87	52.37	2.24		3	7	DMSO	dTRIM37	38	32.02	80.86	2.24
1	6	500 nM	WT	42	90.92	896.55	2.44		2	5	DMSO	dTRIM37	42	10.37	52.39	2.21		3	7	DMSO	dTRIM37	42	34.83	78.46	2.69
1	6	500 nM	WT	46	91.41	863.51	2.46		2	5	DMSO	dTRIM37	46	11.46	53.68	2.23		3	7	DMSO	dTRIM37	46	34.68	81.13	2.14
1	6	500 nM	WT	50	94.97	854.6	2.63		2	5	DMSO	dTRIM37	50	12.52	54.16	2.46		3	7	DMSO	dTRIM37	50	35.45	82.59	2.08
1	6	500 nM	WT	54	99.5	853.4	2.24		2	5	DMSO	dTRIM37	54	12.8	52.14	2.17		3	7	DMSO	dTRIM37	54	38.69	79.08	2.32
1	6	500 nM	WT	58	101.53	876.8	2.26		2	5	DMSO	dTRIM37	58	13.9	52.36	2.39		3	7	DMSO	dTRIM37	58	39.72	81.78	2.2
1	6	500 nM	WT	62	105.81	903.18	2.07		2	5	DMSO	dTRIM37	62	14.36	51.38	2.32		3	7	DMSO	dTRIM37	62	40.72	81.18	2.08
1	6	500 nM	WT	66	114.29	862.97	2.47		2	5	DMSO	dTRIM37	66	15.75	53.04	2.52		3	7	DMSO	dTRIM37	66	41.45	79.78	2.11
1	6	500 nM	WT	70	119.92	883.48	2.24		2	5	DMSO	dTRIM37	70	15.66	51.53	2.47		3	7	DMSO	dTRIM37	70	43.03	79.26	2.12
1	6	500 nM	WT	74	121.97	870.08	2.21		2	5	DMSO	dTRIM37	74	16.43	52.3	2.44		3	7	DMSO	dTRIM37	74	45.06	77.63	2.19
1	6	500 nM	WT	78	124.36	896.03	2.32		2	5	DMSO	dTRIM37	78	16.78	51.23	2.31		3	7	DMSO	dTRIM37	78	45.17	76.11	2.41
1	6	500 nM	WT	82	127.58	870.26	2.26		2	5	DMSO	dTRIM37	82	17.29	52.64	2.21		3	7	DMSO	dTRIM37	82	45.15	72	2.06
1	6	500 nM	WT	86	132.63	871.44	2.6		2	5	DMSO	dTRIM37	86	17.57	52.22	2.21		3	7	DMSO	dTRIM37	86	45.95	73.18	2.08
1	6	500 nM	WT	90	132.39	851.31	2.22		2	5	DMSO	dTRIM37	90	17.95	51.47	2.15		3	7	DMSO	dTRIM37	90	45.2	76.09	1.84
1	6	500 nM	WT	94	137.99	865.24	2.37		2	5	DMSO	dTRIM37	94	18.97	52.58	2.41		3	7	DMSO	dTRIM37	94	46.4	78.66	2.19
1	6	500 nM	WT	98	137.42	855.55	2.5		2	5	DMSO	dTRIM37	98	18.68	51.78	2.24		3	7	DMSO	dTRIM37	98	49.07	78.39	2.54
1	7	500 nM	WT	0	834.39	320.78	1.8		2	6	DMSO	dTRIM37	0	46	68.41	1.94		3	8	DMSO	dTRIM37	0	225.4	33.55	2.17
1	7	500 nM	WT	4	867.45	337.51	2.41		2	6	DMSO	dTRIM37	4	49.81	68.17	2.06		3	8	DMSO	dTRIM37	4	229.47	33.32	2.49
1	7	500 nM	WT	8	883.33	324.55	2.33		2	6	DMSO	dTRIM37	8	45.07	69.78	2.69		3	8	DMSO	dTRIM37	8	233.89	33.25	2.49
1	7	500 nM	WT	10	16.88	303.81	2.26		2	6	DMSO	dTRIM37	10	4.03	61.3	2.33		3	8	DMSO	dTRIM37	10	5.1	30.92	1.8
1	7	500 nM	WT	14	32.09	302.91	2.05		2	6	DMSO	dTRIM37	14	6.84	64.05	2.03		3	8	DMSO	dTRIM37	14	15.76	32.23	2.73
1	7	500 nM	WT	18	39.5	314.67	2.25		2	6	DMSO	dTRIM37	18	8.87	64.23	2.29		3	8	DMSO	dTRIM37	18	23.37	30.36	2.32
1	7	500 nM	WT	22	45.04	314.01	2.7		2	6	DMSO	dTRIM37	22	10.88	64.76	2.49		3	8	DMSO	dTRIM37	22	30.76	31.18	2.19
1	7	500 nM	WT	26	49.01	321.46	2.24		2	6	DMSO	dTRIM37	26	12.18	65.97	2.31		3	8	DMSO	dTRIM37	26	35.96	31.07	2.2
1	7	500 nM	WT	30	53.04	305.37	2.55		2	6	DMSO	dTRIM37	30	13.76	64.17	2		3	8	DMSO	dTRIM37	30	42.46	31.23	2.45
1	7	500 nM	WT	34	55.49	316.06	2.67		2	6	DMSO	dTRIM37	34	14.18	66.81	2.17		3	8	DMSO	dTRIM37	34	46.73	31.16	2.71
1	7	500 nM	WT	38	58.82	289.46	2.11		2	6	DMSO	dTRIM37	38	15.87	63.85	2.46		3	8	DMSO	dTRIM37	38	51.71	30.17	2.53
1	7	500 nM	WT	42	62.46	303.13	2.14		2	6	DMSO	dTRIM37	42	15.5	62.57	2.09		3	8	DMSO	dTRIM37	42	57.1	30.01	2.34
1	7	500 nM	WT	46	65.05	300.47	2.46		2	6	DMSO	dTRIM37	46	16	63.42	2.24		3	8	DMSO	dTRIM37	46	61.34	29.07	2.02
1	7	500 nM	WT	50	61.77	305.8	2.25		2	6	DMSO	dTRIM37	50	17.28	63.27	2.6		3	8	DMSO	dTRIM37	50	65.26	26.42	2.6
1	7	500 nM	WT	54	65.2	319.85	2.11		2	6	DMSO	dTRIM37	54	16.64	64	1.92		3	8	DMSO	dTRIM37	54	66.54	25	2.31
1	7	500 nM	WT	58	65.44	306.23	2.55		2	6	DMSO	dTRIM37	58	19.17	63.55	2.85		3	8	DMSO	dTRIM37	58	72.62	26.97	2.38
1	7	500 nM	WT	62	66.28	304.35	1.9		2	6	DMSO	dTRIM37	62	16.36	62.78	2.34		3	8	DMSO	dTRIM37	62	75.55	26.77	1.97
1	7	500 nM	WT	66	67.88	307.53	2.29		2	6	DMSO	dTRIM37	66	19.64	62.03	2.31		3	8	DMSO	dTRIM37	66	78.94	26.4	2.31
1	7	500 nM	WT	70	68.09	309.26	2.1		2	6	DMSO	dTRIM37	70	19.8	62.03	2.35		3	8	DMSO	dTRIM37	70	80.17	27.3	2.49
1	7	500 nM	WT	74	69.02	314.16	2.37		2	6	DMSO	dTRIM37	74	20.13	63.33	2.27		3	8	DMSO	dTRIM37	74	83.18	27.67	2.29
1	7	500 nM	WT	78	70.8	308.44	2.17		2	6	DMSO	dTRIM37	78	20.73	61.37	2.44		3	8	DMSO	dTRIM37	78	84.65	30.28	2.38
1	7	500 nM	WT	82	67.4	280.79	2.35		2	6	DMSO	dTRIM37	82	22.46	63.17	2.55		3	8	DMSO	dTRIM37	82	88.08	30.3	2.23
1	7	500 nM	WT	86	66.99	290.15	2.16		2	6	DMSO	dTRIM37	86	22.13	62.77	2.26		3	8	DMSO	dTRIM37	86	90.26	29.73	2.33
1	7	500 nM	WT	90	66.6	282.13	2.03		2	6	DMSO	dTRIM37	90	23.09	60.69	2.26		3	8	DMSO	dTRIM37	90	92.89	29.12	1.96
1	7	500 nM	WT	94	70.13	287.12	1.95		2	6	DMSO	dTRIM37	94	20.67	61.24	2.02		3	8	DMSO	dTRIM37	94	95.71	29.52	2.27
1	7	500 nM	WT	98	65.61	277.87	1.97		2	6	DMSO	dTRIM37	98	22.25	60.02	2.05		3	8	DMSO	dTRIM37	98	95.37	29.33	2.02
1	8	500 nM	WT	0	2654.91	1690.58	2.85		2	7	DMSO	dTRIM37	0	22.58	6.5	2.21		3	9	DMSO	dTRIM37	0	229.71	53.81	2.83
1	8	500 nM	WT	4	2351.67	1741.54	2.4		2	7	DMSO	dTRIM37	4	21.48	5.5	2.35		3	9	DMSO	dTRIM37	4	211.22	50.8	2.68
1	8	500 nM	WT	8	2582.01	1694	2.35		2	7	DMSO	dTRIM37	8	21.33	6.11	2.59		3	9	DMSO	dTRIM37	8	229.47	55.11	3.36
1	8	500 nM	WT	10	47.2	1679.56	2.49		2	7	DMSO	dTRIM37	10	3.5	5.62	2.3		3	9	DMSO	dTRIM37	10	6.17	51.41	3.19
1	8	500 nM	WT	14	90.85	1607.71	2.3		2	7	DMSO	dTRIM37	14	4.4	6.01	2.18		3	9	DMSO	dTRIM37	14	17.54	54.34	2.92
1	8	500 nM	WT	18	102.29	1671.8	2.27		2	7	DMSO	dTRIM37	18	5.58	6.44	2.25		3	9	DMSO	dTRIM37	18	27.49	56.93	3.37
1	8	500 nM	WT	22	112.04	1651.06	2.39		2	7	DMSO	dTRIM37	22	6.06	6.11	2.47		3	9	DMSO	dTRIM37	22	35.43	57.87	3.1
1	8	500 nM	WT	26	112.81	1744.52	2.62		2	7	DMSO	dTRIM37	26	6.41	5.24	2.04		3	9	DMSO	dTRIM37	26	42.14	51.03	2.88
1	8	500 nM	WT	30	118.46	1717.06	2.12		2	7	DMSO	dTRIM37	30	7.09	5.45	2.46		3	9	DMSO	dTRIM37	30	49.36	52.6	3.22
1	8	500 nM	WT	34	123.68	1663.88	2.14		2	7	DMSO	dTRIM37	34	8.29	5.75	2.5		3	9	DMSO	dTRIM37	34	55.56	50.42	3.5
1	8	500 nM	WT	38	124.32	1652.01	2.34		2	7	DMSO	dTRIM37	38	8.79	5.41	2.05		3	9	DMSO	dTRIM37	38	60.94	49.5	3.14
1	8	500 nM	WT	42	120.56	1532.69	2.38		2	7	DMSO	dTRIM37	42	9.52	5.57	2.52		3	9	DMSO	dTRIM37	42	63.76	47.39	3.25
1	8	500 nM	WT	46	131.34	1601.29	2.51		2	7	DMSO	dTRIM37	46	9.74	5.32	2.31		3	9	DMSO	dTRIM37	46	70.31	48.89	3.24
1	8	500 nM	WT	50	134	1660.58	2.28		2	7	DMSO	dTRIM37	50	10.57	5.47	2.5		3	9	DMSO	dTRIM37	50	74.41	47.94	3.03
1	8	500 nM	WT	54	134.13	1674.35	2.39		2	7	DMSO	dTRIM37	54	10.39	5	2		3	9	DMSO	dTRIM37	54	75.71	46.89	3.3
1	8	500 nM	WT	58	133.91	1730.01	2.47		2	7	DMSO	dTRIM37	58	10.04	5.64	2.1		3	9	DMSO	dTRIM37	58	80.29	43.87	3.37
1	8	500 nM	WT	62	140.72	1747.42	2.04		2	7	DMSO	dTRIM37	62	9.43	5.43	2.58		3	9	DMSO	dTRIM37	62	83.97	38.41	3.19
1	8	500 nM	WT	66	148.71	1736.72	2.1		2	7	DMSO	dTRIM37	66	11.22	5.63	2.29		3	9	DMSO	dTRIM37	66	88.46	40.64	3.14
1	8	500 nM	WT	70	146.37	1857.26	2.39		2	7	DMSO	dTRIM37	70	11.42	5.82	2.47		3	9	DMSO	dTRIM37	70	90.8	40.55	3.73
1	8	500 nM	WT	74	148.66	1859.68	1.97		2	7	DMSO	dTRIM37	74	11.69	5.04	1.92		3	9	DMSO	dTRIM37	74	93.7	39.15	3.8
1	8	500 nM	WT	78	147.98	1832.25	2.09		2	7	DMSO	dTRIM37	78	11.99	5.08	2.14		3	9	DMSO	dTRIM37	78	97.86	39.8	3.31
1	8	500 nM	WT	82	156.07	1905.91	2.89		2	7	DMSO	dTRIM37	82	12.7	5.26	2.06		3	9	DMSO	dTRIM37	82	98.07	38.68	3.15
1	8	500 nM	WT	86	154.67	1880.89	2.4		2	7	DMSO	dTRIM37	86	12.2	4.87	2.14		3	9	DMSO	dTRIM37	86	103.82	39.4	3.32
1	8	500 nM	WT	90	162.59	1939.13	2.18		2	7	DMSO	dTRIM37	90	12.06	5.32	2.57		3	9	DMSO	dTRIM37	90	103.63	41.65	3.36
1	8	500 nM	WT	94	163.31	1956.54	2.52		2	7	DMSO	dTRIM37	94	12.34	5.47	2.22		3	9	DMSO	dTRIM37	94	106.68	41.06	2.96
1	8	500 nM	WT	98	163.56	1842.98	2.65		2	7	DMSO	dTRIM37	98	13.67	5.65	2.75		3	9	DMSO	dTRIM37	98	106.66	41.17	3.24
1	9	500 nM	WT	0	1665.2	1469.16	2.16		2	8	DMSO	dTRIM37	0	10.97	12.02	2.13		3	10	DMSO	dTRIM37	0	50.72	24.28	2.17
1	9	500 nM	WT	4	1669.3	1448.65	2.36		2	8	DMSO	dTRIM37	4	10.84	11.61	2.22		3	10	DMSO	dTRIM37	4	52.04	24.68	2.32
1	9	500 nM	WT	8	1687.54	1447.45	2.24		2	8	DMSO	dTRIM37	8	10.92	11.86	2.18		3	10	DMSO	dTRIM37	8	52.04	25.49	2.61
1	9	500 nM	WT	10	11.52	1443.7	2.37		2	8	DMSO	dTRIM37	10	2.75	12.43	2.33		3	10	DMSO	dTRIM37	10	3.26	24.45	1.8
1	9	500 nM	WT	14	26	1459.35	2.55		2	8	DMSO	dTRIM37	14	3.68	12.52	2.18		3	10	DMSO	dTRIM37	14	8.77	25.12	2.32
1	9	500 nM	WT	18	34.84	1356.27	2.58		2	8	DMSO	dTRIM37	18	3.49	11.98	2.13		3	10	DMSO	dTRIM37	18	12.25	26.17	2.41
1	9	500 nM	WT	22	42.19	1296.29	2.79		2	8	DMSO	dTRIM37	22	4.11	12.34	2.46		3	10	DMSO	dTRIM37	22	15.18	26.34	2.61
1	9	500 nM	WT	26	46.81	1315.13	2.27		2	8	DMSO	dTRIM37	26	4.12	12.06	2.37		3	10	DMSO	dTRIM37	26	17.22	26.4	2.28
1	9	500 nM	WT	30	53.94	1290.35	2.3		2	8	DMSO	dTRIM37	30	4.85	12.26	2.49		3	10	DMSO	dTRIM37	30	19.55	25.45	2.24
1	9	500 nM	WT	34	58.67	1313.57	2.73		2	8	DMSO	dTRIM37	34	5.13	12.43	2.58		3	10	DMSO	dTRIM37	34	23	25.35	2.7
1	9	500 nM	WT	38	63.07	1297.14	2.37		2	8	DMSO	dTRIM37	38	5.15	11.98	2.38		3	10	DMSO	dTRIM37	38	24.2	25.32	2.33
1	9	500 nM	WT	42	67.44	1339.17	2.55		2	8	DMSO	dTRIM37	42	5.54	12.65	2.2		3	10	DMSO	dTRIM37	42	26.58	26.68	2.28
1	9	500 nM	WT	46	71.67	1327.09	2.74		2	8	DMSO	dTRIM37	46	5.75	12.45	2.49		3	10	DMSO	dTRIM37	46	27.76	25.55	2.38
1	9	500 nM	WT	50	75.05	1370.49	2		2	8	DMSO	dTRIM37	50	6.19	12.29	2.17		3	10	DMSO	dTRIM37	50	28.22	24.86	2.58
1	9	500 nM	WT	54	73.9	1310.47	2.28		2	8	DMSO	dTRIM37	54	6.28	12.32	2.21		3	10	DMSO	dTRIM37	54	28.08	26.23	2.2
1	9	500 nM	WT	58	77.76	1317.18	2.57		2	8	DMSO	dTRIM37	58	5.81	12.01	2.22		3	10	DMSO	dTRIM37	58	30.19	26.29	2.4
1	9	500 nM	WT	62	82.58	1269.15	2.47		2	8	DMSO	dTRIM37	62	6.61	12.27	2.58		3	10	DMSO	dTRIM37	62	32.41	26.81	2.77
1	9	500 nM	WT	66	84.02	1330.45	2.18		2	8	DMSO	dTRIM37	66	7.05	12.04	2.43		3	10	DMSO	dTRIM37	66	32.98	26.37	2.36
1	9	500 nM	WT	70	86.42	1384.31	2.53		2	8	DMSO	dTRIM37	70	7.38	12.49	2.37		3	10	DMSO	dTRIM37	70	35.61	25.27	2.39
1	9	500 nM	WT	74	89.39	1446.31	2.59		2	8	DMSO	dTRIM37	74	6.59	11.8	2.46		3	10	DMSO	dTRIM37	74	35.4	26.4	2.42
1	9	500 nM	WT	78	93.15	1455.26	2.27		2	8	DMSO	dTRIM37	78	7.32	12.37	2.41		3	10	DMSO	dTRIM37	78	36.7	26.94	2.49
1	9	500 nM	WT	82	90.22	1446.08	2.8		2	8	DMSO	dTRIM37	82	7.71	12.42	2.44		3	10	DMSO	dTRIM37	82	36.18	26.78	2.2
1	9	500 nM	WT	86	91.54	1467.3	2.51		2	8	DMSO	dTRIM37	86	7.4	11.81	2.37		3	10	DMSO	dTRIM37	86	37.57	27.65	2.41
1	9	500 nM	WT	90	95.46	1401.33	2.36		2	8	DMSO	dTRIM37	90	7.23	11.93	2.34		3	10	DMSO	dTRIM37	90	37.65	26.8	2.2
1	9	500 nM	WT	94	97.65	1319.17	2.53		2	8	DMSO	dTRIM37	94	7.66	12.63	2.2		3	10	DMSO	dTRIM37	94	41.18	26.36	2.23
1	9	500 nM	WT	98	94.79	1336.51	2.34		2	8	DMSO	dTRIM37	98	7.45	11.78	2.13		3	10	DMSO	dTRIM37	98	41.06	27.14	1.88
1	10	500 nM	WT	0	2341.02	762.55	2.34		2	9	DMSO	dTRIM37	0	6.53	8.12	2.36		3	11	DMSO	dTRIM37	0	54.04	16.43	2.39
1	10	500 nM	WT	4	2354.96	700.92	2.32		2	9	DMSO	dTRIM37	4	5.77	8.12	2.28		3	11	DMSO	dTRIM37	4	54.57	16.78	2.55
1	10	500 nM	WT	8	2336.85	874.92	2.24		2	9	DMSO	dTRIM37	8	5.86	8.42	2.37		3	11	DMSO	dTRIM37	8	54.14	15.68	2.06
1	10	500 nM	WT	10	26.3	879.07	1.92		2	9	DMSO	dTRIM37	10	2.65	8.15	2.03		3	11	DMSO	dTRIM37	10	4.25	15.73	2.28
1	10	500 nM	WT	14	45.89	859.96	2.16		2	9	DMSO	dTRIM37	14	2.43	7.79	2.14		3	11	DMSO	dTRIM37	14	7.95	16.9	2.47
1	10	500 nM	WT	18	53.64	917.84	2.69		2	9	DMSO	dTRIM37	18	3.33	8.34	2.44		3	11	DMSO	dTRIM37	18	10.83	16.71	2.28
1	10	500 nM	WT	22	59.63	1064.16	2.23		2	9	DMSO	dTRIM37	22	3.1	8.21	2.13		3	11	DMSO	dTRIM37	22	13.67	16.36	2.22
1	10	500 nM	WT	26	62.15	1092.03	2.27		2	9	DMSO	dTRIM37	26	3.37	8.21	2.6		3	11	DMSO	dTRIM37	26	15.96	15.53	2.44
1	10	500 nM	WT	30	71.56	1084.03	2.23		2	9	DMSO	dTRIM37	30	3.2	7.72	2.37		3	11	DMSO	dTRIM37	30	17.14	14.92	1.99
1	10	500 nM	WT	34	87.29	1060.86	2.75		2	9	DMSO	dTRIM37	34	3.75	7.73	2.41		3	11	DMSO	dTRIM37	34	20.74	16.27	2.61
1	10	500 nM	WT	38	93.81	1092.58	2.33		2	9	DMSO	dTRIM37	38	3.2	7.5	2.32		3	11	DMSO	dTRIM37	38	22.84	16.4	2.81
1	10	500 nM	WT	42	96.43	1059.68	2.43		2	9	DMSO	dTRIM37	42	3.12	7.75	2.31		3	11	DMSO	dTRIM37	42	23.78	16.85	2.44
1	10	500 nM	WT	46	102.72	1079.44	2.67		2	9	DMSO	dTRIM37	46	3.44	7.8	2.03		3	11	DMSO	dTRIM37	46	24.09	16.5	2.66
1	10	500 nM	WT	50	114.83	1044.08	2.38		2	9	DMSO	dTRIM37	50	3.74	8.24	2.58		3	11	DMSO	dTRIM37	50	24.65	15.73	2.53
1	10	500 nM	WT	54	102.54	1025.49	2.48		2	9	DMSO	dTRIM37	54	3.39	7.66	1.96		3	11	DMSO	dTRIM37	54	25.87	16.05	2.07
1	10	500 nM	WT	58	111.19	989.95	2.69		2	9	DMSO	dTRIM37	58	3.83	8.02	2.29		3	11	DMSO	dTRIM37	58	27.56	16.06	2.39
1	10	500 nM	WT	62	120.68	1078.14	2.12		2	9	DMSO	dTRIM37	62	4.6	8.17	2.37		3	11	DMSO	dTRIM37	62	29.23	15.35	2.38
1	10	500 nM	WT	66	122.83	1084.29	2.4		2	9	DMSO	dTRIM37	66	4.39	7.91	2.17		3	11	DMSO	dTRIM37	66	28.18	15.07	2.17
1	10	500 nM	WT	70	129.37	1048.23	2.44		2	9	DMSO	dTRIM37	70	4.47	7.98	2.16		3	11	DMSO	dTRIM37	70	29.76	15.91	2.39
1	10	500 nM	WT	74	132.61	1050.06	2.41		2	9	DMSO	dTRIM37	74	4.31	8.61	2.38		3	11	DMSO	dTRIM37	74	30.65	15.61	2.18
1	10	500 nM	WT	78	140.78	1043.91	2.58		2	9	DMSO	dTRIM37	78	4.27	8.31	2.57		3	11	DMSO	dTRIM37	78	32.33	16.8	2.57
1	10	500 nM	WT	82	159.82	1079.47	2.4		2	9	DMSO	dTRIM37	82	4.79	8.19	2.17		3	11	DMSO	dTRIM37	82	32.69	16.28	2.33
1	10	500 nM	WT	86	153.58	1052.51	2.23		2	9	DMSO	dTRIM37	86	4.47	7.7	1.69		3	11	DMSO	dTRIM37	86	34.27	16.5	2.79
1	10	500 nM	WT	90	198.38	997.55	2.38		2	9	DMSO	dTRIM37	90	4.56	7.68	2.06		3	11	DMSO	dTRIM37	90	34.56	15.89	2.24
1	10	500 nM	WT	94	228.51	1050.42	2.66		2	9	DMSO	dTRIM37	94	5.32	8.29	2.31		3	11	DMSO	dTRIM37	94	34.86	15.65	2.15
1	10	500 nM	WT	98	217	1052.52	2.39		2	9	DMSO	dTRIM37	98	4.72	8.35	2.39		3	11	DMSO	dTRIM37	98	33.86	16.12	1.93
1	1	DMSO	dTRIM37	0	108.24	99.07	2.31		2	10	DMSO	dTRIM37	0	11.33	9.34	2.29		3	12	DMSO	dTRIM37	0	155.24	25.17	2.37
1	1	DMSO	dTRIM37	4	107.7	95.73	2.46		2	10	DMSO	dTRIM37	4	12.18	9.43	2.69		3	12	DMSO	dTRIM37	4	157.48	25.75	2.19
1	1	DMSO	dTRIM37	8	105.33	95.55	2.41		2	10	DMSO	dTRIM37	8	12	9.18	2.39		3	12	DMSO	dTRIM37	8	161.65	25.76	2.47
1	1	DMSO	dTRIM37	10	8.9	89.02	2.37		2	10	DMSO	dTRIM37	10	2.86	9.14	2.54		3	12	DMSO	dTRIM37	10	7.19	23.87	2.19
1	1	DMSO	dTRIM37	14	16.83	90.09	2.44		2	10	DMSO	dTRIM37	14	3.43	8.96	2.37		3	12	DMSO	dTRIM37	14	15.65	24.88	2.5
1	1	DMSO	dTRIM37	18	19.79	83.99	2.31		2	10	DMSO	dTRIM37	18	4.3	8.95	2.5		3	12	DMSO	dTRIM37	18	19.57	23.76	2.13
1	1	DMSO	dTRIM37	22	22.44	85.97	2.22		2	10	DMSO	dTRIM37	22	3.53	8.65	1.79		3	12	DMSO	dTRIM37	22	25.5	25.52	2.39
1	1	DMSO	dTRIM37	26	24.93	86.37	2.46		2	10	DMSO	dTRIM37	26	4.71	8.82	2.34		3	12	DMSO	dTRIM37	26	29.23	24.72	2.19
1	1	DMSO	dTRIM37	30	26.55	87.52	2.17		2	10	DMSO	dTRIM37	30	5.35	9.5	2.55		3	12	DMSO	dTRIM37	30	32.4	25.04	2.77
1	1	DMSO	dTRIM37	34	28.36	88.42	2.17		2	10	DMSO	dTRIM37	34	4.93	9.2	2.36		3	12	DMSO	dTRIM37	34	34.71	24.9	2.31
1	1	DMSO	dTRIM37	38	30.66	91.52	2.18		2	10	DMSO	dTRIM37	38	5.39	9.13	2.38		3	12	DMSO	dTRIM37	38	38.24	25.59	2.31
1	1	DMSO	dTRIM37	42	30.76	89.18	2.16		2	10	DMSO	dTRIM37	42	6.05	9.06	2.76		3	12	DMSO	dTRIM37	42	40.02	24.49	2.38
1	1	DMSO	dTRIM37	46	32.97	89.83	2.48		2	10	DMSO	dTRIM37	46	5.45	8.59	1.99		3	12	DMSO	dTRIM37	46	44.83	24.72	2.07
1	1	DMSO	dTRIM37	50	34.31	91.34	2.14		2	10	DMSO	dTRIM37	50	6.09	9.12	2.18		3	12	DMSO	dTRIM37	50	49.77	25.41	2.58
1	1	DMSO	dTRIM37	54	36.61	93.29	2.17		2	10	DMSO	dTRIM37	54	6.07	8.6	2.19		3	12	DMSO	dTRIM37	54	51.51	24.7	2.23
1	1	DMSO	dTRIM37	58	37.57	93.1	2.53		2	10	DMSO	dTRIM37	58	6.14	8.82	2.24		3	12	DMSO	dTRIM37	58	54.14	25.36	2.46
1	1	DMSO	dTRIM37	62	39.86	91.54	2.58		2	10	DMSO	dTRIM37	62	6.88	8.84	2.18		3	12	DMSO	dTRIM37	62	55.5	24.85	2.26
1	1	DMSO	dTRIM37	66	39.64	91.88	2.23		2	10	DMSO	dTRIM37	66	6.37	8.59	2.39		3	12	DMSO	dTRIM37	66	57.45	24.15	2.4
1	1	DMSO	dTRIM37	70	41.54	90.56	2.66		2	10	DMSO	dTRIM37	70	6.63	8.81	2.23		3	12	DMSO	dTRIM37	70	57.37	24.35	2.15
1	1	DMSO	dTRIM37	74	43	90.72	2.64		2	10	DMSO	dTRIM37	74	6.84	8.97	2.09		3	12	DMSO	dTRIM37	74	59.14	24.78	2.3
1	1	DMSO	dTRIM37	78	42.69	94.33	2.47		2	10	DMSO	dTRIM37	78	6.87	8.57	2.02		3	12	DMSO	dTRIM37	78	61.19	24.11	2.23
1	1	DMSO	dTRIM37	82	44.49	89.47	1.97		2	10	DMSO	dTRIM37	82	7.19	9.41	2.38		3	12	DMSO	dTRIM37	82	62.38	24.64	2.18
1	1	DMSO	dTRIM37	86	44.96	91.25	2.31		2	10	DMSO	dTRIM37	86	7.63	8.81	2.01		3	12	DMSO	dTRIM37	86	68.07	23.84	2.49
1	1	DMSO	dTRIM37	90	46.2	88.42	2.37		2	10	DMSO	dTRIM37	90	7.37	9.06	2.33		3	12	DMSO	dTRIM37	90	67.98	24.35	2.52
1	1	DMSO	dTRIM37	94	45.93	87.58	2.23		2	10	DMSO	dTRIM37	94	8.04	9.79	2.32		3	12	DMSO	dTRIM37	94	68.99	23.44	2.49
1	1	DMSO	dTRIM37	98	46.13	87.05	2.08		2	10	DMSO	dTRIM37	98	7.72	9.21	2.36		3	12	DMSO	dTRIM37	98	69.77	23.2	2.02
1	2	DMSO	dTRIM37	0	277	853.22	2.58		2	11	DMSO	dTRIM37	0	51.33	34.58	2.13		3	13	DMSO	dTRIM37	0	125.02	35.12	2.02
1	2	DMSO	dTRIM37	4	279.03	856.91	2.63		2	11	DMSO	dTRIM37	4	51.38	32.95	2.09		3	13	DMSO	dTRIM37	4	122.61	35.23	2.24
1	2	DMSO	dTRIM37	8	278.92	847.49	3.01		2	11	DMSO	dTRIM37	8	54.2	35.23	2.4		3	13	DMSO	dTRIM37	8	121.32	35.94	2.26
1	2	DMSO	dTRIM37	10	8.19	821.29	2.75		2	11	DMSO	dTRIM37	10	4.26	33.6	2.64		3	13	DMSO	dTRIM37	10	4.49	34.88	2.36
1	2	DMSO	dTRIM37	14	24.38	825.36	2.94		2	11	DMSO	dTRIM37	14	7.61	33.99	2.45		3	13	DMSO	dTRIM37	14	11.28	34.84	2.18
1	2	DMSO	dTRIM37	18	36.13	822.98	2.84		2	11	DMSO	dTRIM37	18	9.33	34.18	2.42		3	13	DMSO	dTRIM37	18	18.36	35.01	2.58
1	2	DMSO	dTRIM37	22	46.92	808.02	2.69		2	11	DMSO	dTRIM37	22	11.41	32.69	2.27		3	13	DMSO	dTRIM37	22	23.52	34.45	2.24
1	2	DMSO	dTRIM37	26	56.24	802.01	2.55		2	11	DMSO	dTRIM37	26	14.22	33.71	2.31		3	13	DMSO	dTRIM37	26	27.7	34.92	2.23
1	2	DMSO	dTRIM37	30	65	806.71	2.62		2	11	DMSO	dTRIM37	30	15.99	33.89	2.52		3	13	DMSO	dTRIM37	30	32.06	36	2.19
1	2	DMSO	dTRIM37	34	73.3	802.03	3.07		2	11	DMSO	dTRIM37	34	17.21	33.59	2.51		3	13	DMSO	dTRIM37	34	36.28	36.11	2.12
1	2	DMSO	dTRIM37	38	80.38	789.01	2.79		2	11	DMSO	dTRIM37	38	18.69	34.61	2.27		3	13	DMSO	dTRIM37	38	39.59	35.34	2.1
1	2	DMSO	dTRIM37	42	86.94	782.52	2.87		2	11	DMSO	dTRIM37	42	18.38	33.88	2.04		3	13	DMSO	dTRIM37	42	43.29	36.47	2.4
1	2	DMSO	dTRIM37	46	91.79	770.49	2.85		2	11	DMSO	dTRIM37	46	20	33.32	2.54		3	13	DMSO	dTRIM37	46	46.1	36.24	2.18
1	2	DMSO	dTRIM37	50	97	772.42	2.34		2	11	DMSO	dTRIM37	50	20.17	33.93	2.24		3	13	DMSO	dTRIM37	50	50.05	37.21	2.59
1	2	DMSO	dTRIM37	54	103.26	776.18	2.76		2	11	DMSO	dTRIM37	54	21.2	33.4	2.56		3	13	DMSO	dTRIM37	54	48.63	35.02	1.88
1	2	DMSO	dTRIM37	58	106.64	772	2.78		2	11	DMSO	dTRIM37	58	21.87	33.29	2.17		3	13	DMSO	dTRIM37	58	52.31	36.15	2.28
1	2	DMSO	dTRIM37	62	108.24	767.34	2.58		2	11	DMSO	dTRIM37	62	22.02	33.1	2.3		3	13	DMSO	dTRIM37	62	54.28	35.28	2.51
1	2	DMSO	dTRIM37	66	114.23	768.81	3.03		2	11	DMSO	dTRIM37	66	24.02	33.62	2.42		3	13	DMSO	dTRIM37	66	55.21	35.16	2.28
1	2	DMSO	dTRIM37	70	115.5	779.66	2.58		2	11	DMSO	dTRIM37	70	23.61	33.12	2.08		3	13	DMSO	dTRIM37	70	57.06	34.46	1.69
1	2	DMSO	dTRIM37	74	118.85	763.69	2.39		2	11	DMSO	dTRIM37	74	25.53	33.44	2.23		3	13	DMSO	dTRIM37	74	58.81	35.1	2.48
1	2	DMSO	dTRIM37	78	122.16	770.07	2.88		2	11	DMSO	dTRIM37	78	27.57	33.14	2.56		3	13	DMSO	dTRIM37	78	58.05	34.71	2.38
1	2	DMSO	dTRIM37	82	123.86	760.72	2.77		2	11	DMSO	dTRIM37	82	27.7	33.24	2.53		3	13	DMSO	dTRIM37	82	60.03	33.73	2.14
1	2	DMSO	dTRIM37	86	125.69	756.39	2.43		2	11	DMSO	dTRIM37	86	30.87	33.98	2.52		3	13	DMSO	dTRIM37	86	60.05	34.4	2.25
1	2	DMSO	dTRIM37	90	129.76	754.91	2.56		2	11	DMSO	dTRIM37	90	30.72	32.39	2.24		3	13	DMSO	dTRIM37	90	60.18	34.85	2.26
1	2	DMSO	dTRIM37	94	132.86	751.82	2.58		2	11	DMSO	dTRIM37	94	32.64	33.96	2.6		3	13	DMSO	dTRIM37	94	64.17	34.22	2.37
1	2	DMSO	dTRIM37	98	133.82	749.07	2.37		2	11	DMSO	dTRIM37	98	30.26	33.5	2.37		3	13	DMSO	dTRIM37	98	62.01	34.78	2.13
1	3	DMSO	dTRIM37	0	241.28	263.77	2.56		2	12	DMSO	dTRIM37	0	30.31	17.74	2.66		3	1	500 nM	WT	0	1316.58	255.47	2.27
1	3	DMSO	dTRIM37	4	246.61	264.07	2.26		2	12	DMSO	dTRIM37	4	29.19	15.73	2.38		3	1	500 nM	WT	4	1325.42	227.71	2.48
1	3	DMSO	dTRIM37	8	243.72	261.18	2.12		2	12	DMSO	dTRIM37	8	29.26	16.45	2.2		3	1	500 nM	WT	8	1312.49	234.63	2.66
1	3	DMSO	dTRIM37	10	12.86	257.91	2.52		2	12	DMSO	dTRIM37	10	2.8	15.89	2.28		3	1	500 nM	WT	10	12.84	233.91	2.78
1	3	DMSO	dTRIM37	14	30.82	258.84	2.47		2	12	DMSO	dTRIM37	14	4.22	14.87	2.27		3	1	500 nM	WT	14	22.66	242.87	2.6
1	3	DMSO	dTRIM37	18	43.47	259.7	2.35		2	12	DMSO	dTRIM37	18	5.46	16.12	2.41		3	1	500 nM	WT	18	27.38	242.75	2.96
1	3	DMSO	dTRIM37	22	54.06	253.25	2.21		2	12	DMSO	dTRIM37	22	6.6	15.3	2.52		3	1	500 nM	WT	22	32.68	242.46	2.92
1	3	DMSO	dTRIM37	26	63.25	254.2	2.67		2	12	DMSO	dTRIM37	26	7.25	15.38	2.09		3	1	500 nM	WT	26	35.74	248.95	3.35
1	3	DMSO	dTRIM37	30	73.96	251.26	2.15		2	12	DMSO	dTRIM37	30	8.17	14.64	2.03		3	1	500 nM	WT	30	35.98	247.17	2.88
1	3	DMSO	dTRIM37	34	80.96	251.83	2.05		2	12	DMSO	dTRIM37	34	9.42	15	2.12		3	1	500 nM	WT	34	39.23	246.32	3.23
1	3	DMSO	dTRIM37	38	86.37	249.54	2.33		2	12	DMSO	dTRIM37	38	9.83	15.74	1.97		3	1	500 nM	WT	38	43.92	243.17	3.04
1	3	DMSO	dTRIM37	42	94.45	254.49	2.24		2	12	DMSO	dTRIM37	42	10.65	15.09	2.08		3	1	500 nM	WT	42	47.28	241.93	2.79
1	3	DMSO	dTRIM37	46	98.92	249.56	2.26		2	12	DMSO	dTRIM37	46	11.46	15.5	2.31		3	1	500 nM	WT	46	50.1	221.53	3.14
1	3	DMSO	dTRIM37	50	102.85	248.71	2.13		2	12	DMSO	dTRIM37	50	12.98	16.15	2.54		3	1	500 nM	WT	50	50.92	228.47	2.9
1	3	DMSO	dTRIM37	54	106.83	247.62	2.27		2	12	DMSO	dTRIM37	54	13.7	15.56	2.38		3	1	500 nM	WT	54	55.02	215.86	2.68
1	3	DMSO	dTRIM37	58	112.03	247.91	2.21		2	12	DMSO	dTRIM37	58	14.09	15.56	2.65		3	1	500 nM	WT	58	59.22	221.05	2.71
1	3	DMSO	dTRIM37	62	114.31	248.17	2.25		2	12	DMSO	dTRIM37	62	13.83	14.72	2.09		3	1	500 nM	WT	62	61.17	216.78	2.33
1	3	DMSO	dTRIM37	66	114.99	247.82	2.46		2	12	DMSO	dTRIM37	66	14.35	14.39	2.4		3	1	500 nM	WT	66	60.28	218.03	2.3
1	3	DMSO	dTRIM37	70	118.37	244.13	2.07		2	12	DMSO	dTRIM37	70	15.18	14.65	2.51		3	1	500 nM	WT	70	63.35	213.79	2.95
1	3	DMSO	dTRIM37	74	124.71	242.27	2.29		2	12	DMSO	dTRIM37	74	15.44	14.68	2.52		3	1	500 nM	WT	74	65.63	212.32	2.27
1	3	DMSO	dTRIM37	78	124.93	242.68	2.3		2	12	DMSO	dTRIM37	78	15.55	13.74	2.41		3	1	500 nM	WT	78	65.09	214.78	2.42
1	3	DMSO	dTRIM37	82	124.56	242.94	2.08		2	12	DMSO	dTRIM37	82	16.5	13.91	2.56		3	1	500 nM	WT	82	66.13	197.04	2.77
1	3	DMSO	dTRIM37	86	127.74	240.92	2.24		2	12	DMSO	dTRIM37	86	16.2	12.75	2.3		3	1	500 nM	WT	86	67.72	183.72	2.76
1	3	DMSO	dTRIM37	90	130.78	241.25	2.68		2	12	DMSO	dTRIM37	90	16.77	14.67	2.38		3	1	500 nM	WT	90	68.24	179.23	2.65
1	3	DMSO	dTRIM37	94	135.72	242.3	2.22		2	12	DMSO	dTRIM37	94	16.81	12.97	2.28		3	1	500 nM	WT	94	67.21	178.28	2.35
1	3	DMSO	dTRIM37	98	132.6	241.82	2.47		2	12	DMSO	dTRIM37	98	17.97	12.95	2.09		3	1	500 nM	WT	98	66.09	178.24	2.76
1	4	DMSO	dTRIM37	0	47.29	56.63	2.43		2	13	DMSO	dTRIM37	0	40.01	17.07	2.1		3	2	500 nM	WT	0	715.53	123.42	3.08
1	4	DMSO	dTRIM37	4	51.27	54.42	2.5		2	13	DMSO	dTRIM37	4	41.18	17.6	2.2		3	2	500 nM	WT	4	727.71	125.61	3.23
1	4	DMSO	dTRIM37	8	50.71	50.55	2.35		2	13	DMSO	dTRIM37	8	40.82	18.12	2.47		3	2	500 nM	WT	8	746.68	126.92	2.91
1	4	DMSO	dTRIM37	10	4.88	47.57	2.82		2	13	DMSO	dTRIM37	10	5.36	17.65	2.23		3	2	500 nM	WT	10	11.39	119.29	3.07
1	4	DMSO	dTRIM37	14	7.29	51.53	2.5		2	13	DMSO	dTRIM37	14	7.34	16.91	2.04		3	2	500 nM	WT	14	20.36	127.15	3.3
1	4	DMSO	dTRIM37	18	8.63	49.8	2.63		2	13	DMSO	dTRIM37	18	8.88	16.85	2.31		3	2	500 nM	WT	18	23.81	126.8	3.59
1	4	DMSO	dTRIM37	22	10.47	49.07	2.36		2	13	DMSO	dTRIM37	22	10.72	17.37	2.25		3	2	500 nM	WT	22	24.96	124.06	3.19
1	4	DMSO	dTRIM37	26	11.95	48.83	2.83		2	13	DMSO	dTRIM37	26	11.23	17.75	2.49		3	2	500 nM	WT	26	27.9	124.97	3.53
1	4	DMSO	dTRIM37	30	13.2	46.26	2.34		2	13	DMSO	dTRIM37	30	12.59	16.66	2.37		3	2	500 nM	WT	30	28	125.25	2.62
1	4	DMSO	dTRIM37	34	13.51	46.73	2.37		2	13	DMSO	dTRIM37	34	13.31	16.86	2.43		3	2	500 nM	WT	34	28.35	123.06	2.9
1	4	DMSO	dTRIM37	38	14.57	48.95	2.31		2	13	DMSO	dTRIM37	38	14.11	17.01	2.58		3	2	500 nM	WT	38	30.04	119.45	2.95
1	4	DMSO	dTRIM37	42	14.67	48.95	2.21		2	13	DMSO	dTRIM37	42	14.87	16.96	2.53		3	2	500 nM	WT	42	31.4	121.29	3.43
1	4	DMSO	dTRIM37	46	16.99	50.16	2.3		2	13	DMSO	dTRIM37	46	15.29	17.01	2.24		3	2	500 nM	WT	46	33.32	124.89	3.6
1	4	DMSO	dTRIM37	50	16.97	47.65	2.14		2	13	DMSO	dTRIM37	50	16.29	17.52	2.15		3	2	500 nM	WT	50	33.17	123.04	3.07
1	4	DMSO	dTRIM37	54	19.46	51.91	2.71		2	13	DMSO	dTRIM37	54	16.8	17.46	2.57		3	2	500 nM	WT	54	33.22	119.88	2.99
1	4	DMSO	dTRIM37	58	18.73	49.88	2.07		2	13	DMSO	dTRIM37	58	17.01	17.14	2.55		3	2	500 nM	WT	58	32.78	114.5	2.68
1	4	DMSO	dTRIM37	62	19.92	50.32	2.02		2	13	DMSO	dTRIM37	62	17.25	16.94	2.56		3	2	500 nM	WT	62	33.16	115	2.95
1	4	DMSO	dTRIM37	66	21.74	50.79	2.62		2	13	DMSO	dTRIM37	66	18.06	17.15	2.22		3	2	500 nM	WT	66	33.92	115.33	3.03
1	4	DMSO	dTRIM37	70	22.42	50.35	2.11		2	13	DMSO	dTRIM37	70	18.55	17.02	2.37		3	2	500 nM	WT	70	33.32	118.88	3.2
1	4	DMSO	dTRIM37	74	24.24	48.56	2.38		2	13	DMSO	dTRIM37	74	18.3	16.23	2.45		3	2	500 nM	WT	74	35.71	118.56	3.44
1	4	DMSO	dTRIM37	78	23.45	50.59	2.16		2	13	DMSO	dTRIM37	78	19.7	17.23	2.48		3	2	500 nM	WT	78	35.33	116.1	2.75
1	4	DMSO	dTRIM37	82	23.04	49.53	2.14		2	13	DMSO	dTRIM37	82	20.5	17.34	2.66		3	2	500 nM	WT	82	36.24	118.13	3.32
1	4	DMSO	dTRIM37	86	24.18	50.3	2.32		2	13	DMSO	dTRIM37	86	20.06	17.55	2.44		3	2	500 nM	WT	86	37.01	115.76	3.04
1	4	DMSO	dTRIM37	90	25.69	49.19	2.12		2	13	DMSO	dTRIM37	90	19.97	17.34	2.11		3	2	500 nM	WT	90	37.69	113.7	2.91
1	4	DMSO	dTRIM37	94	27.14	48.62	2.37		2	13	DMSO	dTRIM37	94	20.11	17.1	2.18		3	2	500 nM	WT	94	37.31	116.23	3.07
1	4	DMSO	dTRIM37	98	27.87	49.37	2.12		2	13	DMSO	dTRIM37	98	20.58	16.85	2.09		3	2	500 nM	WT	98	38.62	117.16	3.03
1	5	DMSO	dTRIM37	0	545.74	295.95	2.41		2	1	DMSO	WT	0	21.91	15.59	2.74		3	3	500 nM	WT	0	1719.56	608.77	12.5
1	5	DMSO	dTRIM37	4	554.24	300.14	2		2	1	DMSO	WT	4	20.86	14.94	2.24		3	3	500 nM	WT	4	1746.13	618.26	12.55
1	5	DMSO	dTRIM37	8	555.24	298.32	2.26		2	1	DMSO	WT	8	21.9	15.32	2.28		3	3	500 nM	WT	8	1740.95	616.57	12.65
1	5	DMSO	dTRIM37	10	20.41	306.99	2.14		2	1	DMSO	WT	10	4.24	16.48	2.84		3	3	500 nM	WT	10	22.92	594.86	12.34
1	5	DMSO	dTRIM37	14	49.25	311.12	2.68		2	1	DMSO	WT	14	4.98	14.8	2.45		3	3	500 nM	WT	14	38.83	622.16	12.51
1	5	DMSO	dTRIM37	18	67.28	302.16	2.65		2	1	DMSO	WT	18	6.58	15.77	2.48		3	3	500 nM	WT	18	47.11	626.76	13.13
1	5	DMSO	dTRIM37	22	83.12	306.5	2.36		2	1	DMSO	WT	22	6.73	15.08	2.51		3	3	500 nM	WT	22	55.15	625.4	13.02
1	5	DMSO	dTRIM37	26	97.75	314.43	2.5		2	1	DMSO	WT	26	7.27	14.98	2.47		3	3	500 nM	WT	26	68.34	614.71	13.45
1	5	DMSO	dTRIM37	30	110.57	318.83	2.33		2	1	DMSO	WT	30	7.33	14.19	2.41		3	3	500 nM	WT	30	74.98	628.52	13.32
1	5	DMSO	dTRIM37	34	122.7	318.31	2.51		2	1	DMSO	WT	34	8.57	15.2	2.68		3	3	500 nM	WT	34	78.7	626.46	12.89
1	5	DMSO	dTRIM37	38	133.88	321.07	2.27		2	1	DMSO	WT	38	9.26	16.03	2.73		3	3	500 nM	WT	38	75.27	628.47	13.11
1	5	DMSO	dTRIM37	42	143.39	316.67	2.2		2	1	DMSO	WT	42	9	14.78	2.2		3	3	500 nM	WT	42	75.41	625.57	13.09
1	5	DMSO	dTRIM37	46	150.71	318.36	2.3		2	1	DMSO	WT	46	9.59	14.31	2.44		3	3	500 nM	WT	46	86.94	619.29	12.83
1	5	DMSO	dTRIM37	50	160.47	316.22	2.29		2	1	DMSO	WT	50	9.9	14.14	2.29		3	3	500 nM	WT	50	82.88	639.67	12.71
1	5	DMSO	dTRIM37	54	162.64	317.28	2.44		2	1	DMSO	WT	54	9.77	15	2.3		3	3	500 nM	WT	54	81.6	621.9	13.01
1	5	DMSO	dTRIM37	58	162.2	320.25	2.4		2	1	DMSO	WT	58	10.51	15.57	2.5		3	3	500 nM	WT	58	86.32	620.45	12.46
1	5	DMSO	dTRIM37	62	158.94	321	2.33		2	1	DMSO	WT	62	11.13	16.13	2.56		3	3	500 nM	WT	62	87.33	623.06	12.61
1	5	DMSO	dTRIM37	66	164.83	319.62	2.2		2	1	DMSO	WT	66	11.41	15.66	2.62		3	3	500 nM	WT	66	98.27	632.88	12.22
1	5	DMSO	dTRIM37	70	184.92	310.31	2.19		2	1	DMSO	WT	70	11.9	16.95	2.56		3	3	500 nM	WT	70	102.23	597.3	12.48
1	5	DMSO	dTRIM37	74	179.97	313.32	2.11		2	1	DMSO	WT	74	11.98	16.12	2.66		3	3	500 nM	WT	74	110.38	602.96	12.2
1	5	DMSO	dTRIM37	78	174.34	316.78	2.2		2	1	DMSO	WT	78	11.21	15.43	2.46		3	3	500 nM	WT	78	119.4	601.36	12.88
1	5	DMSO	dTRIM37	82	178.51	315.94	2.37		2	1	DMSO	WT	82	12.26	16.09	2.42		3	3	500 nM	WT	82	129.19	602.53	12.55
1	5	DMSO	dTRIM37	86	168.33	314.3	2.64		2	1	DMSO	WT	86	12.81	14.86	2.65		3	3	500 nM	WT	86	139.73	598.73	13.2
1	5	DMSO	dTRIM37	90	173.91	312.52	2.36		2	1	DMSO	WT	90	12.54	14.72	2.28		3	3	500 nM	WT	90	148.18	605.77	13.69
1	5	DMSO	dTRIM37	94	178.09	311.81	2.52		2	1	DMSO	WT	94	12.92	16.06	2.58		3	3	500 nM	WT	94	151.8	618.32	12.64
1	5	DMSO	dTRIM37	98	180.42	307.6	2.22		2	1	DMSO	WT	98	13.09	15.99	2.85		3	3	500 nM	WT	98	150.08	603.34	13.61
1	6	DMSO	dTRIM37	0	229.25	148.63	2.22		2	2	DMSO	WT	0	132.65	52.57	2.54		3	4	500 nM	WT	0	831.67	215.8	2.22
1	6	DMSO	dTRIM37	4	227.05	142.92	2.3		2	2	DMSO	WT	4	133.38	52.53	2.93		3	4	500 nM	WT	4	817.76	216.91	2.8
1	6	DMSO	dTRIM37	8	207.24	144.73	2.4		2	2	DMSO	WT	8	131.1	52.82	2.77		3	4	500 nM	WT	8	830.03	214.09	3.1
1	6	DMSO	dTRIM37	10	18.05	137.08	2.21		2	2	DMSO	WT	10	5.75	52.56	2.99		3	4	500 nM	WT	10	11.7	202.72	2.93
1	6	DMSO	dTRIM37	14	38.86	140.59	2.38		2	2	DMSO	WT	14	14.61	53.31	2.75		3	4	500 nM	WT	14	19.17	204.58	2.2
1	6	DMSO	dTRIM37	18	52.64	135.01	2.41		2	2	DMSO	WT	18	21.18	52.58	2.79		3	4	500 nM	WT	18	23.18	198.47	2.84
1	6	DMSO	dTRIM37	22	63.83	124.12	2.41		2	2	DMSO	WT	22	26.77	52.47	2.44		3	4	500 nM	WT	22	26.69	195.57	2.41
1	6	DMSO	dTRIM37	26	73.79	122.39	2.34		2	2	DMSO	WT	26	32.8	52.97	2.69		3	4	500 nM	WT	26	28.16	207.46	2.63
1	6	DMSO	dTRIM37	30	81.63	126.38	2.21		2	2	DMSO	WT	30	36.43	52.25	2.48		3	4	500 nM	WT	30	29.4	205.91	2.43
1	6	DMSO	dTRIM37	34	88.33	129.83	2.6		2	2	DMSO	WT	34	39.7	51.41	2.36		3	4	500 nM	WT	34	31.77	202.58	2.61
1	6	DMSO	dTRIM37	38	94.96	133.29	2.12		2	2	DMSO	WT	38	44.65	52.53	2.79		3	4	500 nM	WT	38	34.44	203.95	2.2
1	6	DMSO	dTRIM37	42	102.02	133.83	2.37		2	2	DMSO	WT	42	49.45	53.04	2.79		3	4	500 nM	WT	42	35.6	198.88	2.57
1	6	DMSO	dTRIM37	46	103.81	122.28	2.57		2	2	DMSO	WT	46	52.4	51.99	2.62		3	4	500 nM	WT	46	37.37	201.37	2.77
1	6	DMSO	dTRIM37	50	104.81	118.88	2.42		2	2	DMSO	WT	50	55.27	52.79	2.68		3	4	500 nM	WT	50	38.62	202.04	2.42
1	6	DMSO	dTRIM37	54	112.94	129.42	2.79		2	2	DMSO	WT	54	58.49	52.4	2.6		3	4	500 nM	WT	54	40.75	206.39	2.75
1	6	DMSO	dTRIM37	58	112.62	117.27	2.3		2	2	DMSO	WT	58	60.55	53.66	3.01		3	4	500 nM	WT	58	40.93	208.6	2.59
1	6	DMSO	dTRIM37	62	110.1	114.47	2.24		2	2	DMSO	WT	62	62.65	52.48	2.43		3	4	500 nM	WT	62	41.86	204.11	2.7
1	6	DMSO	dTRIM37	66	110.43	110.79	2.22		2	2	DMSO	WT	66	64.37	52.13	2.53		3	4	500 nM	WT	66	44.45	205.19	2.84
1	6	DMSO	dTRIM37	70	107.89	105.12	2.43		2	2	DMSO	WT	70	66.34	51.48	2.33		3	4	500 nM	WT	70	45.07	197.7	2.58
1	6	DMSO	dTRIM37	74	115.69	112.92	2.19		2	2	DMSO	WT	74	68.14	51.74	2.46		3	4	500 nM	WT	74	46.69	197.82	2.37
1	6	DMSO	dTRIM37	78	108.65	103.51	2.4		2	2	DMSO	WT	78	68.87	52.38	2.49		3	4	500 nM	WT	78	47.58	199.43	2.65
1	6	DMSO	dTRIM37	82	114.28	106.69	2.37		2	2	DMSO	WT	82	70.5	51.43	2.29		3	4	500 nM	WT	82	48.59	203.52	2.47
1	6	DMSO	dTRIM37	86	114.17	101.43	2.67		2	2	DMSO	WT	86	72.2	51.3	2.52		3	4	500 nM	WT	86	50.07	206.23	3.12
1	6	DMSO	dTRIM37	90	122.18	109.02	2.76		2	2	DMSO	WT	90	74.21	52.11	2.61		3	4	500 nM	WT	90	50.64	207.15	2.59
1	6	DMSO	dTRIM37	94	129.34	113.73	2.68		2	2	DMSO	WT	94	76.29	51.79	2.81		3	4	500 nM	WT	94	51.88	204.35	2.88
1	6	DMSO	dTRIM37	98	134.44	111.34	2.58		2	2	DMSO	WT	98	77.78	52.03	2.76		3	4	500 nM	WT	98	52.63	206.21	2.51
1	7	DMSO	dTRIM37	0	206.29	302.03	2.42		2	3	DMSO	WT	0	12.57	8.59	2.64		3	5	500 nM	WT	0	1251.21	333.73	2.42
1	7	DMSO	dTRIM37	4	207.69	296.71	2.26		2	3	DMSO	WT	4	12.13	8.4	2.67		3	5	500 nM	WT	4	1267	334.48	2.42
1	7	DMSO	dTRIM37	8	208.67	300.21	2.42		2	3	DMSO	WT	8	12.18	8.58	2.23		3	5	500 nM	WT	8	1270.92	337.04	2.06
1	7	DMSO	dTRIM37	10	7.9	280.59	2.36		2	3	DMSO	WT	10	2.51	8.19	2.3		3	5	500 nM	WT	10	13.46	331.52	2.52
1	7	DMSO	dTRIM37	14	18.19	284.06	2.29		2	3	DMSO	WT	14	3.32	8.51	2.55		3	5	500 nM	WT	14	28.11	334.73	2.53
1	7	DMSO	dTRIM37	18	25.1	282.81	2.43		2	3	DMSO	WT	18	3.66	9.1	2.69		3	5	500 nM	WT	18	34.02	335.65	2.43
1	7	DMSO	dTRIM37	22	30.72	283.18	2.13		2	3	DMSO	WT	22	4.21	9.01	2.72		3	5	500 nM	WT	22	39.78	332.7	2.74
1	7	DMSO	dTRIM37	26	36.28	285.5	2.27		2	3	DMSO	WT	26	4.1	8.33	2.41		3	5	500 nM	WT	26	44.32	336.11	2.99
1	7	DMSO	dTRIM37	30	42.02	280.49	2.12		2	3	DMSO	WT	30	4.72	8.67	2.69		3	5	500 nM	WT	30	45	332.95	2.49
1	7	DMSO	dTRIM37	34	46.15	278.92	2.22		2	3	DMSO	WT	34	4.8	8.84	2.78		3	5	500 nM	WT	34	47.89	332.56	2.32
1	7	DMSO	dTRIM37	38	51.74	278.54	2.52		2	3	DMSO	WT	38	5.09	8.42	2.55		3	5	500 nM	WT	38	51.88	334.63	2.38
1	7	DMSO	dTRIM37	42	56.08	279.68	2.69		2	3	DMSO	WT	42	5.04	8.09	2.45		3	5	500 nM	WT	42	54	338.46	2.51
1	7	DMSO	dTRIM37	46	59	281.97	2.39		2	3	DMSO	WT	46	5.42	8.12	2.56		3	5	500 nM	WT	46	54.44	330.28	2.19
1	7	DMSO	dTRIM37	50	62.48	277.06	2.48		2	3	DMSO	WT	50	5.36	7.79	2.37		3	5	500 nM	WT	50	54.37	329.87	1.95
1	7	DMSO	dTRIM37	54	63.8	278.31	1.99		2	3	DMSO	WT	54	5.83	7.89	2.47		3	5	500 nM	WT	54	58.27	328.93	2.55
1	7	DMSO	dTRIM37	58	67.49	271.59	2.29		2	3	DMSO	WT	58	6.1	9.09	2.74		3	5	500 nM	WT	58	60.25	325.39	2.6
1	7	DMSO	dTRIM37	62	70.57	271.39	2.42		2	3	DMSO	WT	62	6.13	8.29	2.46		3	5	500 nM	WT	62	60.47	323.78	2.52
1	7	DMSO	dTRIM37	66	73.36	274.56	2.38		2	3	DMSO	WT	66	6.23	7.96	2.62		3	5	500 nM	WT	66	60.68	320.63	2.24
1	7	DMSO	dTRIM37	70	74.41	272.47	2.35		2	3	DMSO	WT	70	6.01	7.94	2.3		3	5	500 nM	WT	70	63.75	318.83	1.99
1	7	DMSO	dTRIM37	74	77.9	270.97	2.73		2	3	DMSO	WT	74	6.55	8.41	2.44		3	5	500 nM	WT	74	65.15	314.09	2.32
1	7	DMSO	dTRIM37	78	79.57	272.43	2.33		2	3	DMSO	WT	78	6.74	7.64	2.19		3	5	500 nM	WT	78	67.18	314.98	2.44
1	7	DMSO	dTRIM37	82	81.52	270.01	2.5		2	3	DMSO	WT	82	7.34	8.58	2.63		3	5	500 nM	WT	82	69.43	314.72	2.56
1	7	DMSO	dTRIM37	86	83.57	274.97	2.68		2	3	DMSO	WT	86	7.13	8.67	2.76		3	5	500 nM	WT	86	72.13	316.59	2.73
1	7	DMSO	dTRIM37	90	85.69	272.42	2.61		2	3	DMSO	WT	90	7.45	8.52	2.37		3	5	500 nM	WT	90	74.45	319.96	2.51
1	7	DMSO	dTRIM37	94	84.5	272.19	1.86		2	3	DMSO	WT	94	7.46	8.74	2.75		3	5	500 nM	WT	94	74.35	322.72	2.35
1	7	DMSO	dTRIM37	98	87.46	277.48	2.49		2	3	DMSO	WT	98	6.99	8.06	2.11		3	5	500 nM	WT	98	74.42	319.36	2.51
1	8	DMSO	dTRIM37	0	376.94	185.44	5.97		2	4	DMSO	WT	0	33.58	26.19	2.15		3	6	500 nM	WT	0	940.75	267.25	2.57
1	8	DMSO	dTRIM37	4	384.29	178.06	5.37		2	4	DMSO	WT	4	31.16	25.6	1.9		3	6	500 nM	WT	4	930.2	266.57	2.15
1	8	DMSO	dTRIM37	8	371.26	187.57	5.58		2	4	DMSO	WT	8	33.32	25.15	2.36		3	6	500 nM	WT	8	919.08	267.08	2.41
1	8	DMSO	dTRIM37	10	11.4	182.26	6.02		2	4	DMSO	WT	10	3.08	24.23	2.51		3	6	500 nM	WT	10	30.12	252.99	2.2
1	8	DMSO	dTRIM37	14	26.45	182.43	5.92		2	4	DMSO	WT	14	4.65	26.07	2.12		3	6	500 nM	WT	14	51.02	256.79	1.9
1	8	DMSO	dTRIM37	18	37.75	179.5	6.31		2	4	DMSO	WT	18	5.97	24.66	2.16		3	6	500 nM	WT	18	58.43	261.82	2.44
1	8	DMSO	dTRIM37	22	46.49	172.14	5.65		2	4	DMSO	WT	22	7.4	23.83	2.38		3	6	500 nM	WT	22	60.75	267.57	2.34
1	8	DMSO	dTRIM37	26	57.52	181.95	6.05		2	4	DMSO	WT	26	8.95	23.04	2.8		3	6	500 nM	WT	26	63.55	266.01	2.29
1	8	DMSO	dTRIM37	30	66.56	179.94	6.47		2	4	DMSO	WT	30	9.6	24.28	2.21		3	6	500 nM	WT	30	65.73	279.38	2.06
1	8	DMSO	dTRIM37	34	70.45	178.13	5.64		2	4	DMSO	WT	34	9.85	22.65	1.9		3	6	500 nM	WT	34	67.98	276.6	2.32
1	8	DMSO	dTRIM37	38	80.81	178.89	5.42		2	4	DMSO	WT	38	10.91	23.87	2.21		3	6	500 nM	WT	38	70.18	278.7	2.23
1	8	DMSO	dTRIM37	42	86.6	180.48	5.7		2	4	DMSO	WT	42	11.94	23.57	2.13		3	6	500 nM	WT	42	71.41	269.7	2.2
1	8	DMSO	dTRIM37	46	90.82	162.77	5.98		2	4	DMSO	WT	46	11.44	23.53	1.98		3	6	500 nM	WT	46	73.66	266.56	2.3
1	8	DMSO	dTRIM37	50	99.59	179.8	5.97		2	4	DMSO	WT	50	12.24	24.75	2.37		3	6	500 nM	WT	50	73.4	270.27	2.48
1	8	DMSO	dTRIM37	54	104.98	176.39	6.12		2	4	DMSO	WT	54	12.73	23.87	2.48		3	6	500 nM	WT	54	75.31	268	1.96
1	8	DMSO	dTRIM37	58	108.08	175.78	5.82		2	4	DMSO	WT	58	13.24	23.15	2.36		3	6	500 nM	WT	58	78.09	266.65	2.69
1	8	DMSO	dTRIM37	62	116.48	172.08	6.12		2	4	DMSO	WT	62	15.05	25.99	2.54		3	6	500 nM	WT	62	79.25	269.25	2.38
1	8	DMSO	dTRIM37	66	122.88	176.13	5.78		2	4	DMSO	WT	66	15.58	26.75	2.44		3	6	500 nM	WT	66	78.09	268.63	2.43
1	8	DMSO	dTRIM37	70	124.7	182.03	5.53		2	4	DMSO	WT	70	14.14	23.86	2.44		3	6	500 nM	WT	70	78.04	259.96	2.28
1	8	DMSO	dTRIM37	74	130.03	169.35	5.33		2	4	DMSO	WT	74	14.78	25.19	2.01		3	6	500 nM	WT	74	76.73	239.23	2.03
1	8	DMSO	dTRIM37	78	134.11	169.84	5.61		2	4	DMSO	WT	78	15.63	24.94	2.58		3	6	500 nM	WT	78	81.6	261.47	2.01
1	8	DMSO	dTRIM37	82	138.71	174.39	4.93		2	4	DMSO	WT	82	16.36	27.82	2.27		3	6	500 nM	WT	82	86.86	248.63	2.53
1	8	DMSO	dTRIM37	86	141.65	171.7	5.48		2	4	DMSO	WT	86	16.84	28.1	2.42		3	6	500 nM	WT	86	88.81	242.71	2.36
1	8	DMSO	dTRIM37	90	142.48	169.51	5.82		2	4	DMSO	WT	90	16.39	24.03	2.09		3	6	500 nM	WT	90	90.09	251.28	2.4
1	8	DMSO	dTRIM37	94	148.06	173.45	5.66		2	4	DMSO	WT	94	16.94	23.79	2.26		3	6	500 nM	WT	94	92.99	246.17	2.21
1	8	DMSO	dTRIM37	98	148	172.11	5.87		2	4	DMSO	WT	98	17.4	23.74	2.48		3	6	500 nM	WT	98	90.9	247.32	2.06
1	9	DMSO	dTRIM37	0	182.75	82.22	2.33		2	5	DMSO	WT	0	12.83	8.08	1.87		3	7	500 nM	WT	0	1589.1	98.29	1.97
1	9	DMSO	dTRIM37	4	180.06	82.74	2.51		2	5	DMSO	WT	4	13.17	8.26	2.27		3	7	500 nM	WT	4	1552.53	92.39	2.46
1	9	DMSO	dTRIM37	8	177.34	81.04	2.11		2	5	DMSO	WT	8	13.29	7.9	2.44		3	7	500 nM	WT	8	1547.75	92.97	2.52
1	9	DMSO	dTRIM37	10	5.94	82.57	2.29		2	5	DMSO	WT	10	2.82	7.82	2.05		3	7	500 nM	WT	10	18.39	88.59	2.38
1	9	DMSO	dTRIM37	14	14.15	81.08	2.07		2	5	DMSO	WT	14	3.89	7.9	2.45		3	7	500 nM	WT	14	28.83	90.75	2.33
1	9	DMSO	dTRIM37	18	20.21	81.68	2.57		2	5	DMSO	WT	18	4.81	7.79	2.53		3	7	500 nM	WT	18	30.52	92.82	2.4
1	9	DMSO	dTRIM37	22	25.51	80.75	2.29		2	5	DMSO	WT	22	5.15	7.52	2.66		3	7	500 nM	WT	22	33.95	95.38	2.04
1	9	DMSO	dTRIM37	26	31.23	81.38	2.22		2	5	DMSO	WT	26	5.66	7.85	2.33		3	7	500 nM	WT	26	37.23	97.82	2.8
1	9	DMSO	dTRIM37	30	34.75	79.98	2.32		2	5	DMSO	WT	30	5.69	7.56	2.33		3	7	500 nM	WT	30	38.92	101.66	2.15
1	9	DMSO	dTRIM37	34	39.74	80.71	2.37		2	5	DMSO	WT	34	5.91	7.44	2.12		3	7	500 nM	WT	34	39.54	103.47	2.57
1	9	DMSO	dTRIM37	38	43.98	79.48	2.57		2	5	DMSO	WT	38	6.62	7.79	2.6		3	7	500 nM	WT	38	41.47	100.14	2.41
1	9	DMSO	dTRIM37	42	45.96	78.71	2.34		2	5	DMSO	WT	42	6.23	7.4	2.06		3	7	500 nM	WT	42	44.14	100.99	2.51
1	9	DMSO	dTRIM37	46	48.76	78.77	2.18		2	5	DMSO	WT	46	6.64	7.51	2.51		3	7	500 nM	WT	46	45.31	100.91	1.85
1	9	DMSO	dTRIM37	50	53.18	79.18	2.44		2	5	DMSO	WT	50	6.71	7.03	2.39		3	7	500 nM	WT	50	49.16	98.32	2.31
1	9	DMSO	dTRIM37	54	55.18	77.89	2.19		2	5	DMSO	WT	54	7.37	7.3	2.61		3	7	500 nM	WT	54	50.13	99.64	2.26
1	9	DMSO	dTRIM37	58	57.63	78.86	2.4		2	5	DMSO	WT	58	6.86	6.91	2.08		3	7	500 nM	WT	58	49.88	101.18	2.51
1	9	DMSO	dTRIM37	62	59.13	78.38	2.38		2	5	DMSO	WT	62	7.42	7	2.44		3	7	500 nM	WT	62	51.19	100.73	2.47
1	9	DMSO	dTRIM37	66	60.81	78.31	2.09		2	5	DMSO	WT	66	6.92	6.68	2.41		3	7	500 nM	WT	66	51.22	100.5	2.58
1	9	DMSO	dTRIM37	70	63.56	77.32	2.51		2	5	DMSO	WT	70	7.3	6.38	2.08		3	7	500 nM	WT	70	54.1	102.48	2.29
1	9	DMSO	dTRIM37	74	65.17	77.39	2.19		2	5	DMSO	WT	74	7.85	7.18	2.52		3	7	500 nM	WT	74	55.28	103.58	2.53
1	9	DMSO	dTRIM37	78	67.53	78.45	2.53		2	5	DMSO	WT	109	12.05	9.06	2.62		3	7	500 nM	WT	78	58.03	107.45	2.4
1	9	DMSO	dTRIM37	82	66.36	76.91	2.51		2	5	DMSO	WT	0	19.48	12.45	2.28		3	7	500 nM	WT	82	56.07	103.76	2.12
1	9	DMSO	dTRIM37	86	71.1	77.44	2.18		2	5	DMSO	WT	4	19.32	11.36	2.43		3	7	500 nM	WT	86	53.95	104.31	2.34
1	9	DMSO	dTRIM37	90	71.68	77.19	2.63		2	5	DMSO	WT	8	19.71	12.74	2.21		3	7	500 nM	WT	90	55.08	104.17	2.05
1	9	DMSO	dTRIM37	94	69.74	76.88	2.14		2	5	DMSO	WT	10	4.07	13.22	2.8		3	7	500 nM	WT	94	57.6	107.7	2.38
1	9	DMSO	dTRIM37	98	74.31	77.18	1.99		2	5	DMSO	WT	14	4.43	12.31	2.59		3	7	500 nM	WT	98	56.18	106.23	2.14
1	10	DMSO	dTRIM37	0	181.82	129.91	2.28		2	6	DMSO	WT	18	5.01	11.78	2.47		3	8	500 nM	WT	0	408.92	88.77	2.17
1	10	DMSO	dTRIM37	4	168.6	134.71	2.38		2	6	DMSO	WT	22	5.71	11.24	2.31		3	8	500 nM	WT	4	403.12	88.18	2.83
1	10	DMSO	dTRIM37	8	160.28	131.22	2.48		2	6	DMSO	WT	26	6.27	11.49	2.04		3	8	500 nM	WT	8	404.07	87.02	2.5
1	10	DMSO	dTRIM37	10	7.69	125.61	2.66		2	6	DMSO	WT	30	7.12	12.73	2.21		3	8	500 nM	WT	10	8.59	86.25	2.5
1	10	DMSO	dTRIM37	14	16.66	128.07	2.33		2	6	DMSO	WT	34	6.35	10.73	1.69		3	8	500 nM	WT	14	16.28	89.81	2.76
1	10	DMSO	dTRIM37	18	21.71	125.51	2.3		2	6	DMSO	WT	38	7.52	11.72	2.42		3	8	500 nM	WT	18	18.81	86.95	2.29
1	10	DMSO	dTRIM37	22	26.24	128.39	2.19		2	6	DMSO	WT	42	7.63	10.72	2.33		3	8	500 nM	WT	22	21.23	87.62	2.27
1	10	DMSO	dTRIM37	26	30.75	126.1	2.39		2	6	DMSO	WT	46	8.52	12.01	2.41		3	8	500 nM	WT	26	23.52	89.3	2.52
1	10	DMSO	dTRIM37	30	35.6	124.86	2.57		2	6	DMSO	WT	50	9.17	11.92	2.22		3	8	500 nM	WT	30	25.1	92.57	2.5
1	10	DMSO	dTRIM37	34	39.24	121.93	2.48		2	6	DMSO	WT	54	10.47	11.41	2.67		3	8	500 nM	WT	34	25.58	88.57	2.44
1	10	DMSO	dTRIM37	38	44.36	120.5	2.56		2	6	DMSO	WT	58	10.57	12.07	2.41		3	8	500 nM	WT	38	26.52	89.06	2.43
1	10	DMSO	dTRIM37	42	46.56	126.46	2.47		2	6	DMSO	WT	62	10.8	11.03	2.48		3	8	500 nM	WT	42	26.61	91.59	2.6
1	10	DMSO	dTRIM37	46	49.86	123.5	2.75		2	6	DMSO	WT	66	10.68	11.95	2.6		3	8	500 nM	WT	46	29.17	89.15	2.44
1	10	DMSO	dTRIM37	50	51.13	121.98	2.29		2	6	DMSO	WT	70	11.4	11.16	2.61		3	8	500 nM	WT	50	27.99	85.75	2.14
1	10	DMSO	dTRIM37	54	51.79	121.29	2.1		2	6	DMSO	WT	74	12.09	11.92	2.48		3	8	500 nM	WT	54	28	86.29	2.43
1	10	DMSO	dTRIM37	58	56.9	122.17	2.62		2	6	DMSO	WT	78	11.61	11.58	2.36		3	8	500 nM	WT	58	28.39	85.06	2.1
1	10	DMSO	dTRIM37	62	61.63	123.28	2.58		2	6	DMSO	WT	82	12.82	11.79	2.46		3	8	500 nM	WT	62	28.81	85.66	2.59
1	10	DMSO	dTRIM37	66	60.63	118.41	2.35		2	6	DMSO	WT	86	12.01	11.48	2.49		3	8	500 nM	WT	66	29.08	85.23	2.44
1	10	DMSO	dTRIM37	70	68.66	120.02	2.52		2	6	DMSO	WT	90	13	11.83	2.22		3	8	500 nM	WT	70	30.43	85.35	2.5
1	10	DMSO	dTRIM37	74	64.11	114.42	2.71		2	6	DMSO	WT	94	13.06	12.21	2.39		3	8	500 nM	WT	74	30.85	85.82	2.65
1	10	DMSO	dTRIM37	78	65.87	119.58	2.2		2	6	DMSO	WT	98	11.95	11.69	2.13		3	8	500 nM	WT	78	31.83	83.86	2.76
1	10	DMSO	dTRIM37	82	69.58	120.02	2.43		2	6	DMSO	WT	0	51.19	43.03	2.65		3	8	500 nM	WT	82	32.53	84.55	2.61
1	10	DMSO	dTRIM37	86	72.9	120.93	2.96		2	6	DMSO	WT	4	49.73	44.15	2.19		3	8	500 nM	WT	86	32.6	85.3	2.28
1	10	DMSO	dTRIM37	90	74	120.62	2.39		2	6	DMSO	WT	8	52.54	45.57	2.5		3	8	500 nM	WT	90	34.72	85.49	2.67
1	10	DMSO	dTRIM37	94	73.18	118.37	2.47		2	6	DMSO	WT	10	3.35	44.59	2.34		3	8	500 nM	WT	94	35.19	87.97	2.98
1	10	DMSO	dTRIM37	98	65.1	116.11	2.24		2	6	DMSO	WT	14	6.68	45.81	2.2		3	8	500 nM	WT	98	35.22	85.67	2.42
1	11	DMSO	dTRIM37	0	157.76	79.76	11.49		2	7	DMSO	WT	18	8.95	45.02	2.47		3	9	500 nM	WT	0	1728.34	1470.43	2.18
1	11	DMSO	dTRIM37	4	158.86	85.63	11.85		2	7	DMSO	WT	22	11.19	46.21	2.79		3	9	500 nM	WT	4	1733.19	1475.22	2.51
1	11	DMSO	dTRIM37	8	157.88	85.07	12.46		2	7	DMSO	WT	26	13.1	46.4	2.56		3	9	500 nM	WT	8	1724.65	1476.97	2.22
1	11	DMSO	dTRIM37	10	7.93	80.53	11.37		2	7	DMSO	WT	30	14.7	46.2	2.52		3	9	500 nM	WT	10	21.48	1427.39	2.31
1	11	DMSO	dTRIM37	14	16.69	83.66	11.67		2	7	DMSO	WT	34	16.13	46.15	2.54		3	9	500 nM	WT	14	40.52	1461.1	2.34
1	11	DMSO	dTRIM37	18	21.32	85.83	11.66		2	7	DMSO	WT	38	17.16	46.08	2.15		3	9	500 nM	WT	18	48.18	1470.06	2.11
1	11	DMSO	dTRIM37	22	24.29	81.44	11.73		2	7	DMSO	WT	42	18.99	43.65	2.57		3	9	500 nM	WT	22	53.28	1471.86	2.2
1	11	DMSO	dTRIM37	26	28.42	82.85	11.8		2	7	DMSO	WT	46	18.72	42.25	1.83		3	9	500 nM	WT	26	56.21	1469.81	2.32
1	11	DMSO	dTRIM37	30	31.81	85.65	11.63		2	7	DMSO	WT	50	20.37	42.32	2.2		3	9	500 nM	WT	30	61.12	1469.83	2.79
1	11	DMSO	dTRIM37	34	34.83	88.82	12.04		2	7	DMSO	WT	54	22.63	43.5	2.24		3	9	500 nM	WT	34	62.45	1467.56	2.51
1	11	DMSO	dTRIM37	38	37.06	86.21	11.98		2	7	DMSO	WT	58	23	46.81	2.47		3	9	500 nM	WT	38	70.24	1452.92	2.17
1	11	DMSO	dTRIM37	42	38.11	82.53	11.25		2	7	DMSO	WT	62	24.18	46.96	2.05		3	9	500 nM	WT	42	88.73	1445.14	2.31
1	11	DMSO	dTRIM37	46	42.14	86.17	12.48		2	7	DMSO	WT	66	26.66	45.49	2.51		3	9	500 nM	WT	46	78.49	1459.18	2.15
1	11	DMSO	dTRIM37	50	43.14	84.96	12.03		2	7	DMSO	WT	70	26.98	45.13	2.33		3	9	500 nM	WT	50	77.44	1461.33	2.17
1	11	DMSO	dTRIM37	54	44.77	85.83	11.7		2	7	DMSO	WT	74	26.94	41.91	2.39		3	9	500 nM	WT	54	82.51	1460.18	2.32
1	11	DMSO	dTRIM37	58	47.25	87.23	11.69		2	7	DMSO	WT	78	27.75	41.51	2.03		3	9	500 nM	WT	58	79.42	1462.41	2.09
1	11	DMSO	dTRIM37	62	48.44	84.4	11.4		2	7	DMSO	WT	82	28.21	41.25	2.07		3	9	500 nM	WT	62	86.6	1455.57	2.78
1	11	DMSO	dTRIM37	66	50.54	85.68	11.66		2	7	DMSO	WT	86	28.93	40.97	2.42		3	9	500 nM	WT	66	86.53	1464.6	2.48
1	11	DMSO	dTRIM37	70	50.98	84.45	11.58		2	7	DMSO	WT	90	30.46	41.53	2.41		3	9	500 nM	WT	70	89.33	1452.7	2.76
1	11	DMSO	dTRIM37	74	50.59	83.44	11.31		2	7	DMSO	WT	94	29.52	42.42	2.36		3	9	500 nM	WT	74	91.63	1460.25	2.24
1	11	DMSO	dTRIM37	78	52.99	84.63	11.89		2	7	DMSO	WT	98	30.5	41.95	2.18		3	9	500 nM	WT	78	89.2	1458.21	2.62
1	11	DMSO	dTRIM37	82	55.55	88.34	12.49		2	7	DMSO	WT	0	14.45	15.41	2.43		3	9	500 nM	WT	82	87.8	1451.44	2.01
1	11	DMSO	dTRIM37	86	56.15	87.63	11.36		2	7	DMSO	WT	4	13.84	14.82	2.17		3	9	500 nM	WT	86	90.6	1450.19	2.72
1	11	DMSO	dTRIM37	90	56.9	90.35	11.28		2	7	DMSO	WT	8	13.89	15.54	2.22		3	9	500 nM	WT	90	92.32	1448.41	2.25
1	11	DMSO	dTRIM37	94	59.48	87.15	11.94		2	7	DMSO	WT	10	3.04	14.89	2.34		3	9	500 nM	WT	94	92.19	1452.28	2.52
1	11	DMSO	dTRIM37	98	59.17	90.09	11.6		2	7	DMSO	WT	14	3.35	15.31	2.56		3	9	500 nM	WT	98	97.64	1447.39	2.52
1	1	500 nM	dTRIM37	0	22.81	21.8	2.07		2	8	DMSO	WT	18	4.4	15.67	2.56		3	10	500 nM	WT	0	129.28	155.49	3.29
1	1	500 nM	dTRIM37	4	22.27	21.88	2.46		2	8	DMSO	WT	22	3.93	13.88	2.17		3	10	500 nM	WT	4	128.36	154.49	3.35
1	1	500 nM	dTRIM37	8	22.21	21.43	2.43		2	8	DMSO	WT	26	5.34	15.48	2.55		3	10	500 nM	WT	8	128.25	158.4	3.99
1	1	500 nM	dTRIM37	10	3.62	20.76	2.22		2	8	DMSO	WT	30	5.37	14.42	2.39		3	10	500 nM	WT	10	11.23	155.39	4.15
1	1	500 nM	dTRIM37	14	5.14	21.15	2.25		2	8	DMSO	WT	34	5.24	14.53	2.01		3	10	500 nM	WT	14	15.63	156.38	3.58
1	1	500 nM	dTRIM37	18	6.09	21.79	2.24		2	8	DMSO	WT	38	5.41	14.32	2.02		3	10	500 nM	WT	18	16.13	153.36	3.64
1	1	500 nM	dTRIM37	22	5.86	20.92	2.19		2	8	DMSO	WT	42	5.82	15.87	2.22		3	10	500 nM	WT	22	16.6	151.35	3.34
1	1	500 nM	dTRIM37	26	6.6	21.29	2.6		2	8	DMSO	WT	46	5.87	14.35	2.32		3	10	500 nM	WT	26	17.59	154.9	3.49
1	1	500 nM	dTRIM37	30	6.26	21.58	2.1		2	8	DMSO	WT	50	6.75	14.99	2.52		3	10	500 nM	WT	30	17.37	152.32	3.65
1	1	500 nM	dTRIM37	34	6.53	21.81	2.44		2	8	DMSO	WT	54	6.67	14.3	2.36		3	10	500 nM	WT	34	17	148.44	3.12
1	1	500 nM	dTRIM37	38	6.79	21.77	2.37		2	8	DMSO	WT	58	6.68	14.79	2.17		3	10	500 nM	WT	38	17.63	151.19	3.57
1	1	500 nM	dTRIM37	42	6.23	21.02	2.06		2	8	DMSO	WT	62	7.06	15.23	2.58		3	10	500 nM	WT	42	18.11	152.85	3.72
1	1	500 nM	dTRIM37	46	6.49	22.11	2.18		2	8	DMSO	WT	66	6.94	15.24	2.21		3	10	500 nM	WT	46	18.17	146.38	3.53
1	1	500 nM	dTRIM37	50	7.09	21.93	2.47		2	8	DMSO	WT	70	6.86	14.52	2.08		3	10	500 nM	WT	50	18.19	150.45	3.65
1	1	500 nM	dTRIM37	54	7.19	22.59	2.42		2	8	DMSO	WT	74	6.93	14.73	2.09		3	10	500 nM	WT	54	19.72	166.83	3.29
1	1	500 nM	dTRIM37	58	7.58	23.06	2.59		2	8	DMSO	WT	78	7.87	15.74	2.57		3	10	500 nM	WT	58	18.86	159.28	3.58
1	1	500 nM	dTRIM37	62	6.87	21.95	2.14		2	8	DMSO	WT	82	7.79	15.71	2.51		3	10	500 nM	WT	62	18.65	150.87	3.02
1	1	500 nM	dTRIM37	66	7.26	21.63	2.26		2	8	DMSO	WT	86	7.24	15.04	2.51		3	10	500 nM	WT	66	18.86	162.57	2.86
1	1	500 nM	dTRIM37	70	7.62	23.22	2.31		2	8	DMSO	WT	90	7.87	15.26	2.16		3	10	500 nM	WT	70	18.55	159.02	3.07
1	1	500 nM	dTRIM37	74	8.2	22.81	2.32		2	8	DMSO	WT	94	7.48	14.67	1.98		3	10	500 nM	WT	74	18.69	155.19	3.41
1	1	500 nM	dTRIM37	78	7.69	22.29	2.14		2	8	DMSO	WT	98	8.05	14.98	2.24		3	10	500 nM	WT	78	19	152.92	3.36
1	1	500 nM	dTRIM37	82	7.47	22.13	2.18		2	8	DMSO	WT	0	61.51	47.81	2.59		3	10	500 nM	WT	82	19.14	152.08	3.23
1	1	500 nM	dTRIM37	86	7.62	20.43	2.27		2	8	DMSO	WT	4	62.28	47.69	2.57		3	10	500 nM	WT	86	20.26	160.93	3.63
1	1	500 nM	dTRIM37	90	8.52	21.49	2.47		2	8	DMSO	WT	8	60.97	48.47	2.73		3	10	500 nM	WT	90	20.25	161.26	3.11
1	1	500 nM	dTRIM37	94	8.1	21.27	2.56		2	8	DMSO	WT	10	5.05	44.6	2.39		3	10	500 nM	WT	94	20.09	159.83	3.26
1	1	500 nM	dTRIM37	98	8.59	19.56	2.48		2	8	DMSO	WT	14	9.81	46.94	2.39		3	10	500 nM	WT	98	20.4	165.25	3.35
1	2	500 nM	dTRIM37	0	1064.36	69	2.36		2	9	DMSO	WT	18	12.94	47.94	2.43		3	11	500 nM	WT	0	1776.23	297.67	2.17
1	2	500 nM	dTRIM37	4	1081.94	70.97	2.62		2	9	DMSO	WT	22	15.3	47.43	2.21		3	11	500 nM	WT	4	1818.69	297.69	2.47
1	2	500 nM	dTRIM37	8	1068.19	69.91	2.59		2	9	DMSO	WT	26	18.1	46.21	2.17		3	11	500 nM	WT	8	1815.94	296.04	2.54
1	2	500 nM	dTRIM37	10	45.68	61.06	2.33		2	9	DMSO	WT	30	21.02	45.79	2.88		3	11	500 nM	WT	10	21.04	299.75	2.49
1	2	500 nM	dTRIM37	14	59.24	63.26	2.81		2	9	DMSO	WT	34	22.52	46.22	2.77		3	11	500 nM	WT	14	35.46	306.15	2.29
1	2	500 nM	dTRIM37	18	63.11	63.07	2.23		2	9	DMSO	WT	38	23.56	46.68	2.67		3	11	500 nM	WT	18	45.75	300.12	2.75
1	2	500 nM	dTRIM37	22	68.11	63.73	2.39		2	9	DMSO	WT	42	25.33	45.73	2.68		3	11	500 nM	WT	22	51.92	303.71	2.47
1	2	500 nM	dTRIM37	26	71.63	63.39	2.25		2	9	DMSO	WT	46	26.9	48.18	2.9		3	11	500 nM	WT	26	55.33	297.7	2.69
1	2	500 nM	dTRIM37	30	73.46	62.2	2.34		2	9	DMSO	WT	50	28.35	46.57	3.07		3	11	500 nM	WT	30	56.13	310.39	2.28
1	2	500 nM	dTRIM37	34	79.05	62.89	2.52		2	9	DMSO	WT	54	29.14	46.26	2.69		3	11	500 nM	WT	34	59.03	300.85	2.17
1	2	500 nM	dTRIM37	38	80.07	63.06	2.34		2	9	DMSO	WT	58	30.1	45.5	2.48		3	11	500 nM	WT	38	60.03	295.37	2.29
1	2	500 nM	dTRIM37	42	79.33	62.21	2.62		2	9	DMSO	WT	62	30.78	45.87	2.23		3	11	500 nM	WT	42	60.57	295.27	2.21
1	2	500 nM	dTRIM37	46	85.03	62.13	2.61		2	9	DMSO	WT	66	31.91	46.6	2.45		3	11	500 nM	WT	46	71.95	289.75	2.04
1	2	500 nM	dTRIM37	50	85.83	62.62	2.14		2	9	DMSO	WT	70	33.48	47.85	2.99		3	11	500 nM	WT	50	75.56	291.22	2.25
1	2	500 nM	dTRIM37	54	92.56	62.79	2.5		2	9	DMSO	WT	74	32.8	47.26	2.43		3	11	500 nM	WT	54	74.55	282.61	2.66
1	2	500 nM	dTRIM37	58	95.58	62.27	2.35		2	9	DMSO	WT	78	33.85	45.81	2.31		3	11	500 nM	WT	58	75.5	276.09	2.39
1	2	500 nM	dTRIM37	62	96.41	62.5	2.17		2	9	DMSO	WT	82	33.89	45.59	2.19		3	11	500 nM	WT	62	78.79	267.13	2.7
1	2	500 nM	dTRIM37	66	97.34	63.43	2.55		2	9	DMSO	WT	86	34.87	47.33	2.36		3	11	500 nM	WT	66	83.79	266.23	2.28
1	2	500 nM	dTRIM37	70	102.27	62.44	2.38		2	9	DMSO	WT	90	34.93	46.05	2.56		3	11	500 nM	WT	70	85.83	269.64	2.01
1	2	500 nM	dTRIM37	74	105.48	62.43	2.33		2	9	DMSO	WT	94	36.35	46.38	2.58		3	11	500 nM	WT	74	86.05	257.09	2.41
1	2	500 nM	dTRIM37	78	107.4	60.69	2.6		2	9	DMSO	WT	98	36.28	44.42	2.66		3	11	500 nM	WT	78	86.25	249.05	2.33
1	2	500 nM	dTRIM37	82	103.97	61.73	2.26		2	9	DMSO	WT	0	65.3	32.79	2.49		3	11	500 nM	WT	82	84.49	257.9	2.03
1	2	500 nM	dTRIM37	86	107.28	60.21	2.14		2	9	DMSO	WT	4	64.53	32.51	2.66		3	11	500 nM	WT	86	91.96	271.35	2.21
1	2	500 nM	dTRIM37	90	108.48	62.36	2.83		2	9	DMSO	WT	8	66.05	33.04	1.99		3	11	500 nM	WT	90	98.3	261.13	2.16
1	2	500 nM	dTRIM37	94	107.79	59.98	2.13		2	9	DMSO	WT	10	3.82	29.94	2.23		3	11	500 nM	WT	94	100.79	269.71	2.17
1	2	500 nM	dTRIM37	98	112.61	60.85	2.31		2	9	DMSO	WT	14	8.08	31.54	2.49		3	11	500 nM	WT	98	109.84	262.37	2.56
1	3	500 nM	dTRIM37	0	673.08	174.46	2.28		2	10	DMSO	WT	18	11.52	33.14	2.33		3	12	500 nM	WT	0	185.86	100.13	2.22
1	3	500 nM	dTRIM37	4	686.92	173.85	2.28		2	10	DMSO	WT	22	14.14	32.83	2.48		3	12	500 nM	WT	4	178.04	100.04	2.6
1	3	500 nM	dTRIM37	8	700.95	188.88	2.2		2	10	DMSO	WT	26	16.16	32.31	2.09		3	12	500 nM	WT	8	163.45	99.09	2.4
1	3	500 nM	dTRIM37	10	8.12	176.86	2.64		2	10	DMSO	WT	30	19.35	33.91	2.17		3	12	500 nM	WT	10	2.81	96.87	2.01
1	3	500 nM	dTRIM37	14	13.08	176.23	2.31		2	10	DMSO	WT	34	20.52	32.28	2.27		3	12	500 nM	WT	14	3.64	101.94	2.26
1	3	500 nM	dTRIM37	18	15.85	177.72	2.08		2	10	DMSO	WT	38	22.35	31.83	2.29		3	12	500 nM	WT	18	3.99	99.41	2.5
1	3	500 nM	dTRIM37	22	18.41	177.15	2.47		2	10	DMSO	WT	42	23.76	32.2	2.5		3	12	500 nM	WT	22	4.72	98.11	2.16
1	3	500 nM	dTRIM37	26	20.38	187.93	2.78		2	10	DMSO	WT	46	24.64	30.81	1.82		3	12	500 nM	WT	26	4.83	99.41	1.78
1	3	500 nM	dTRIM37	30	21.87	178.47	2.28		2	10	DMSO	WT	50	25.46	30.85	2.35		3	12	500 nM	WT	30	5.83	101.54	2.46
1	3	500 nM	dTRIM37	34	24.2	180.8	2.28		2	10	DMSO	WT	54	27.46	32.36	2.41		3	12	500 nM	WT	34	6.53	101.17	2.24
1	3	500 nM	dTRIM37	38	25.6	183.96	2.43		2	10	DMSO	WT	58	27.85	31.88	2.25		3	12	500 nM	WT	38	6.54	100.74	1.99
1	3	500 nM	dTRIM37	42	25.95	185.44	2.31		2	10	DMSO	WT	62	28.69	31.86	2.17		3	12	500 nM	WT	42	6.83	100.26	2.35
1	3	500 nM	dTRIM37	46	28.78	183.75	2.46		2	10	DMSO	WT	66	29.35	32.32	2.3		3	12	500 nM	WT	46	7.48	101.43	2.45
1	3	500 nM	dTRIM37	50	28.81	178.78	2.3		2	10	DMSO	WT	70	29.31	31.83	2.21		3	12	500 nM	WT	50	7.94	101.08	2.39
1	3	500 nM	dTRIM37	54	30.35	174.78	2.31		2	10	DMSO	WT	74	30.55	32.06	2.48		3	12	500 nM	WT	54	6.45	101.15	2.57
1	3	500 nM	dTRIM37	58	31.66	178.78	2.34		2	10	DMSO	WT	78	30.83	31.53	1.91		3	12	500 nM	WT	58	6.89	101.56	2.44
1	3	500 nM	dTRIM37	62	33.66	169.09	2.44		2	10	DMSO	WT	82	31.97	31.7	2.48		3	12	500 nM	WT	62	7.49	103.44	2.08
1	3	500 nM	dTRIM37	66	33.5	169.5	2.46		2	10	DMSO	WT	86	31.11	31.3	2.37		3	12	500 nM	WT	66	7.88	102.59	2.33
1	3	500 nM	dTRIM37	70	34.16	168.21	2.25		2	10	DMSO	WT	90	31.11	30.2	2.29		3	12	500 nM	WT	70	8.19	100.52	2.52
1	3	500 nM	dTRIM37	74	34.69	167.25	2.23		2	10	DMSO	WT	94	32.56	31.25	2.34		3	12	500 nM	WT	74	7.16	100.22	2.58
1	3	500 nM	dTRIM37	78	36.26	163.07	2.51		2	10	DMSO	WT	98	33.32	30.63	2.14		3	12	500 nM	WT	78	7.14	100.79	2.18
1	3	500 nM	dTRIM37	82	36.51	157.74	2.21		2	10	DMSO	WT	0	104.31	66.24	2.14		3	12	500 nM	WT	82	6.79	98.54	2.31
1	3	500 nM	dTRIM37	86	37.44	160.24	2.29		2	10	DMSO	WT	4	104.02	65.68	2.5		3	12	500 nM	WT	86	7.04	100.34	2.34
1	3	500 nM	dTRIM37	90	37.76	153.9	2.22		2	10	DMSO	WT	8	102.64	65.16	2.03		3	12	500 nM	WT	90	7.14	101.72	2.42
1	3	500 nM	dTRIM37	94	39.86	153.25	2.38		2	10	DMSO	WT	10	6.37	62.99	2.2		3	12	500 nM	WT	94	7.3	103.36	2.53
1	3	500 nM	dTRIM37	98	39.05	155.41	2.38		2	10	DMSO	WT	14	12.62	63.49	1.98		3	12	500 nM	WT	98	6.76	102.83	2.27
1	4	500 nM	dTRIM37	0	95.82	140.18	7.19		2	11	DMSO	WT	18	17.39	63.45	2.28		3	1	DMSO	WT	0	175.97	71.35	2.4
1	4	500 nM	dTRIM37	4	93.9	136.9	7.26		2	11	DMSO	WT	22	21.84	65.02	2.58		3	1	DMSO	WT	4	176.24	68.56	2.76
1	4	500 nM	dTRIM37	8	88.39	127.39	6.99		2	11	DMSO	WT	26	25.09	63.94	2.18		3	1	DMSO	WT	8	174.7	70.75	2.9
1	4	500 nM	dTRIM37	10	5.78	128.97	7.46		2	11	DMSO	WT	30	26.88	61.19	2.05		3	1	DMSO	WT	10	5.79	68.31	2.16
1	4	500 nM	dTRIM37	14	8.3	128.46	7.47		2	11	DMSO	WT	34	31.1	61.89	2.5		3	1	DMSO	WT	14	17.26	68.53	2.58
1	4	500 nM	dTRIM37	18	9.5	134.19	7.58		2	11	DMSO	WT	38	32.11	60.43	2.08		3	1	DMSO	WT	18	26.04	68.99	2.58
1	4	500 nM	dTRIM37	22	10.59	127.16	7.11		2	11	DMSO	WT	42	33.85	60.79	2.52		3	1	DMSO	WT	22	34.97	67.72	2.69
1	4	500 nM	dTRIM37	26	10.81	128.07	7.11		2	11	DMSO	WT	46	38.13	61.36	2.61		3	1	DMSO	WT	26	41.3	66.33	2.79
1	4	500 nM	dTRIM37	30	11.41	139.71	7.56		2	11	DMSO	WT	50	41.03	59.55	2.3		3	1	DMSO	WT	30	46.4	61.19	2.45
1	4	500 nM	dTRIM37	34	11.6	130.01	6.92		2	11	DMSO	WT	54	43.31	58.93	2.29		3	1	DMSO	WT	34	53.9	61.87	2.53
1	4	500 nM	dTRIM37	38	12.21	131.86	7.06		2	11	DMSO	WT	58	45.82	59.55	2.6		3	1	DMSO	WT	38	59.4	62.57	2.91
1	4	500 nM	dTRIM37	42	12.56	129.98	6.66		2	11	DMSO	WT	62	48.04	58.87	2.23		3	1	DMSO	WT	42	63.21	61.05	2.51
1	4	500 nM	dTRIM37	46	13.22	131.82	6.97		2	11	DMSO	WT	66	50.35	59.87	2.45		3	1	DMSO	WT	46	67.88	63.05	2.6
1	4	500 nM	dTRIM37	50	12.81	122.11	6.63		2	11	DMSO	WT	70	52.75	59.68	2.21		3	1	DMSO	WT	50	70.36	63.07	3
1	4	500 nM	dTRIM37	54	13.27	131.66	7.25		2	11	DMSO	WT	74	53.39	59.59	2.34		3	1	DMSO	WT	54	73.63	63.98	2.98
1	4	500 nM	dTRIM37	58	12.87	123.13	7.11		2	11	DMSO	WT	78	54.57	59.69	2.28		3	1	DMSO	WT	58	76.66	63.6	2.63
1	4	500 nM	dTRIM37	62	14.75	131.92	7.73		2	11	DMSO	WT	82	57.14	59.83	2.29		3	1	DMSO	WT	62	80.55	64.35	3.04
1	4	500 nM	dTRIM37	66	13.54	126.96	7.05		2	11	DMSO	WT	86	57.1	59.54	2.45		3	1	DMSO	WT	66	86.22	64.59	2.55
1	4	500 nM	dTRIM37	70	14.72	130.05	7.86		2	11	DMSO	WT	90	57.81	60.36	2.48		3	1	DMSO	WT	70	89.3	65.43	2.94
1	4	500 nM	dTRIM37	74	14.26	130.06	6.73		2	11	DMSO	WT	94	59.38	58.71	2.36		3	1	DMSO	WT	74	94.82	64.76	3.24
1	4	500 nM	dTRIM37	78	14.63	125.86	7.44		2	11	DMSO	WT	98	62.47	59.26	2.26		3	1	DMSO	WT	78	96.12	64.42	3.07
1	4	500 nM	dTRIM37	82	14.64	127.57	7.21		2	11	DMSO	WT	0	38.84	11.64	2.2		3	1	DMSO	WT	82	96.9	63.61	2.92
1	4	500 nM	dTRIM37	86	15.3	129.78	7.48		2	11	DMSO	WT	4	39	12.09	2.58		3	1	DMSO	WT	86	103.46	63.61	2.72
1	4	500 nM	dTRIM37	90	15.04	124.72	7.27		2	11	DMSO	WT	8	39.36	11.88	2.25		3	1	DMSO	WT	90	101.75	62.97	2.71
1	4	500 nM	dTRIM37	94	16.28	131.86	8.32		2	11	DMSO	WT	10	3.8	12.05	2.91		3	1	DMSO	WT	94	102.02	61.43	2.26
1	4	500 nM	dTRIM37	98	16.63	128.85	7.31		2	11	DMSO	WT	14	4.73	10.92	2.35		3	1	DMSO	WT	98	107.18	64.36	2.75
1	5	500 nM	dTRIM37	0	389.7	482.22	25.07		2	12	DMSO	WT	18	5.7	10.76	2.33		3	2	DMSO	WT	0	531.24	212.73	2.05
1	5	500 nM	dTRIM37	4	416.88	473.68	23.93		2	12	DMSO	WT	22	7.36	10.87	2.32		3	2	DMSO	WT	4	515.92	197.8	2.33
1	5	500 nM	dTRIM37	8	435.52	485.37	23.73		2	12	DMSO	WT	26	8.63	11.67	2.34		3	2	DMSO	WT	8	511.84	217.49	2.32
1	5	500 nM	dTRIM37	10	7.64	478.33	23.44		2	12	DMSO	WT	30	9.11	11.57	2.52		3	2	DMSO	WT	10	12.79	207.53	2.24
1	5	500 nM	dTRIM37	14	8.44	481.86	23.04		2	12	DMSO	WT	34	10.32	11.54	2.68		3	2	DMSO	WT	14	41.9	199.1	2.32
1	5	500 nM	dTRIM37	18	11.46	484.78	22.89		2	12	DMSO	WT	38	11.3	11.83	2.51		3	2	DMSO	WT	18	68.26	195.66	2.26
1	5	500 nM	dTRIM37	22	13.13	484.77	23.58		2	12	DMSO	WT	42	11.85	11.82	2.52		3	2	DMSO	WT	22	85.13	197.93	2.31
1	5	500 nM	dTRIM37	26	13.93	486.1	22.54		2	12	DMSO	WT	46	12.13	11.56	2.6		3	2	DMSO	WT	26	107.46	209.06	2.26
1	5	500 nM	dTRIM37	30	14.05	481.93	21.33		2	12	DMSO	WT	50	13.16	11.44	2.39		3	2	DMSO	WT	30	121.91	199.99	2.31
1	5	500 nM	dTRIM37	34	16.27	474.73	21.25		2	12	DMSO	WT	54	14.31	12.15	2.74		3	2	DMSO	WT	34	127.44	184.46	2.31
1	5	500 nM	dTRIM37	38	17.07	472.42	21.51		2	12	DMSO	WT	58	14.39	11.99	2.48		3	2	DMSO	WT	38	148.67	202.55	2.41
1	5	500 nM	dTRIM37	42	19.33	482.29	21.95		2	12	DMSO	WT	62	15.41	11.78	2.67		3	2	DMSO	WT	42	170.97	204.35	2.14
1	5	500 nM	dTRIM37	46	19.46	480.73	21.62		2	12	DMSO	WT	66	15.19	11.03	2.09		3	2	DMSO	WT	46	178.7	194.93	2.33
1	5	500 nM	dTRIM37	50	18.94	466.11	21.75		2	12	DMSO	WT	70	17.07	11.88	2.93		3	2	DMSO	WT	50	178.28	204.94	2.53
1	5	500 nM	dTRIM37	54	15.98	474.01	30.42		2	12	DMSO	WT	74	17.05	11.92	2.3		3	2	DMSO	WT	54	197.68	211.15	2.37
1	5	500 nM	dTRIM37	58	15.72	472.9	49.64		2	12	DMSO	WT	78	17.82	12.65	2.39		3	2	DMSO	WT	58	206.91	198.53	2.18
1	5	500 nM	dTRIM37	62	18.92	484.8	55.1		2	12	DMSO	WT	82	18.69	13.4	2.68		3	2	DMSO	WT	62	207.81	192.93	2.31
1	5	500 nM	dTRIM37	66	19.68	477.48	24.97		2	12	DMSO	WT	86	19.2	10.77	2.52		3	2	DMSO	WT	66	215.89	206.5	2.53
1	5	500 nM	dTRIM37	70	22.28	475.95	25.72		2	12	DMSO	WT	90	19.37	11.42	2.43		3	2	DMSO	WT	70	221.62	205.54	2.3
1	5	500 nM	dTRIM37	74	23.96	485.73	24.46		2	12	DMSO	WT	94	19.66	10.98	2.26		3	2	DMSO	WT	74	234.42	211.64	2.43
1	5	500 nM	dTRIM37	78	24.4	491.32	24.46		2	12	DMSO	WT	98	20.79	11.58	2.76		3	2	DMSO	WT	78	241.35	216.1	1.96
1	5	500 nM	dTRIM37	82	25.43	488.62	23.7		2	1	500 nM	WT	0	619.87	85.9	2.37		3	2	DMSO	WT	82	261.78	214.41	2.45
1	5	500 nM	dTRIM37	86	25.72	488.42	22.15		2	1	500 nM	WT	4	634.03	94.85	2.87		3	2	DMSO	WT	86	267.19	226.14	2.35
1	5	500 nM	dTRIM37	90	27.28	487.51	21.93		2	1	500 nM	WT	8	633.93	91.57	2.24		3	2	DMSO	WT	90	271.45	251.12	2.85
1	5	500 nM	dTRIM37	94	28.59	484.57	22.8		2	1	500 nM	WT	10	15.01	77.19	2.18		3	2	DMSO	WT	94	281.85	236.94	2.26
1	5	500 nM	dTRIM37	98	29	484.11	23.89		2	1	500 nM	WT	14	21.46	82.7	2.28		3	2	DMSO	WT	98	289.92	222.44	2.42
1	6	500 nM	dTRIM37	0	1239.25	325.69	2.42		2	1	500 nM	WT	18	23.46	89.68	2.32		3	3	DMSO	WT	0	470.69	157.9	2.91
1	6	500 nM	dTRIM37	4	1226.76	334.33	2.46		2	1	500 nM	WT	22	24.48	91.43	2.63		3	3	DMSO	WT	4	474.83	163.11	3.24
1	6	500 nM	dTRIM37	8	1225.77	328.29	2.42		2	1	500 nM	WT	26	25.33	92.49	2.42		3	3	DMSO	WT	8	488.48	164.37	2.91
1	6	500 nM	dTRIM37	10	16.7	332.34	2.48		2	1	500 nM	WT	30	25.34	88.83	2.09		3	3	DMSO	WT	10	10.73	165.53	3.09
1	6	500 nM	dTRIM37	14	26.37	332.66	2.63		2	1	500 nM	WT	34	26.25	88.93	2.3		3	3	DMSO	WT	14	34.44	171.97	2.7
1	6	500 nM	dTRIM37	18	30.46	338.72	2.31		2	1	500 nM	WT	38	26.06	85.75	1.85		3	3	DMSO	WT	18	53.46	174.41	2.73
1	6	500 nM	dTRIM37	22	35.75	338.54	2.73		2	1	500 nM	WT	42	28.46	95.09	2.59		3	3	DMSO	WT	22	69.08	171.98	2.94
1	6	500 nM	dTRIM37	26	37.39	324.71	2.54		2	1	500 nM	WT	46	28.76	96.26	2.27		3	3	DMSO	WT	26	86.34	167.47	2.8
1	6	500 nM	dTRIM37	30	41.32	325.9	2.3		2	1	500 nM	WT	50	30.18	92.67	2.9		3	3	DMSO	WT	30	100.68	155.49	2.69
1	6	500 nM	dTRIM37	34	44.03	318.35	2.24		2	1	500 nM	WT	54	30.53	94.87	2.34		3	3	DMSO	WT	34	113.89	159.82	2.72
1	6	500 nM	dTRIM37	38	47.13	332.13	2.65		2	1	500 nM	WT	58	30.81	90.69	2.18		3	3	DMSO	WT	38	122.68	151.19	2.63
1	6	500 nM	dTRIM37	42	48.33	327.15	2.27		2	1	500 nM	WT	62	31.37	90.46	2.38		3	3	DMSO	WT	42	139.38	145.14	2.38
1	6	500 nM	dTRIM37	46	51.93	332.1	2.34		2	1	500 nM	WT	66	31.93	85.81	2.41		3	3	DMSO	WT	46	145.97	140.26	2.49
1	6	500 nM	dTRIM37	50	54.5	329.46	2.47		2	1	500 nM	WT	70	32.04	87.57	2.38		3	3	DMSO	WT	50	150.95	137.21	2.64
1	6	500 nM	dTRIM37	54	55.42	325.78	2.44		2	1	500 nM	WT	74	31.8	90.41	1.94		3	3	DMSO	WT	54	153.86	132.54	2.48
1	6	500 nM	dTRIM37	58	58.65	326.04	2.39		2	1	500 nM	WT	78	33.61	91.36	2.61		3	3	DMSO	WT	58	172.96	139.42	2.85
1	6	500 nM	dTRIM37	62	60.48	322.47	2.44		2	1	500 nM	WT	82	32.15	86.33	2.35		3	3	DMSO	WT	62	175.85	147.22	2.67
1	6	500 nM	dTRIM37	66	61.53	325.66	2.23		2	1	500 nM	WT	86	33.07	87.41	2.4		3	3	DMSO	WT	66	187.22	147.51	2.72
1	6	500 nM	dTRIM37	70	65	320.31	2.55		2	1	500 nM	WT	90	33.92	88.26	2.32		3	3	DMSO	WT	70	197.06	152.04	2.99
1	6	500 nM	dTRIM37	74	66.63	326.74	2.3		2	1	500 nM	WT	94	34.11	88.26	2.37		3	3	DMSO	WT	74	201.63	155.4	3.1
1	6	500 nM	dTRIM37	78	69.41	321.55	2.5		2	1	500 nM	WT	98	34.19	87.07	2.42		3	3	DMSO	WT	78	208.38	160.88	2.94
1	6	500 nM	dTRIM37	82	72.71	323.91	2.66		2	2	500 nM	WT	0	131.39	34.26	2.2		3	3	DMSO	WT	82	222.11	153.25	2.89
1	6	500 nM	dTRIM37	86	72.26	328.53	2.36		2	2	500 nM	WT	4	132.95	33.81	2.3		3	3	DMSO	WT	86	229.35	161.82	3.06
1	6	500 nM	dTRIM37	90	74.49	334.96	2.6		2	2	500 nM	WT	8	133.97	34.08	2.46		3	3	DMSO	WT	90	232.19	161.93	2.69
1	6	500 nM	dTRIM37	94	74.92	333.15	2.41		2	2	500 nM	WT	10	6.23	31.6	2.87		3	3	DMSO	WT	94	232.54	163.87	3.07
1	6	500 nM	dTRIM37	98	77.06	331.2	2.61		2	2	500 nM	WT	14	8.06	31.98	2.47		3	3	DMSO	WT	98	229.25	165.68	2.92
1	7	500 nM	dTRIM37	0	179.37	57.03	2.72		2	2	500 nM	WT	18	9.39	33.18	2.52		3	4	DMSO	WT	0	131.14	29.25	1.88
1	7	500 nM	dTRIM37	4	176.46	57.87	2.27		2	2	500 nM	WT	22	9.35	33.37	2.41		3	4	DMSO	WT	4	133.28	30.12	2.78
1	7	500 nM	dTRIM37	8	181.81	55.91	2.37		2	2	500 nM	WT	26	9.21	33.06	2.08		3	4	DMSO	WT	8	130.86	30.31	2.03
1	7	500 nM	dTRIM37	10	3	54.19	1.86		2	2	500 nM	WT	30	11.32	34.65	2.63		3	4	DMSO	WT	10	4.62	30.27	2.44
1	7	500 nM	dTRIM37	14	5.05	55.77	2.45		2	2	500 nM	WT	34	11.11	33.67	2.52		3	4	DMSO	WT	14	10.88	28.03	2.62
1	7	500 nM	dTRIM37	18	5.82	55.14	2.17		2	2	500 nM	WT	38	11.43	32.93	2.4		3	4	DMSO	WT	18	16.31	27.21	2.22
1	7	500 nM	dTRIM37	22	6.96	56.78	2.1		2	2	500 nM	WT	42	10.81	32.32	2.21		3	4	DMSO	WT	22	21.88	27.62	2.38
1	7	500 nM	dTRIM37	26	8.34	56.04	2.51		2	2	500 nM	WT	46	11.73	32.93	2.45		3	4	DMSO	WT	26	25.82	27.41	2.5
1	7	500 nM	dTRIM37	30	9.07	55.68	2.21		2	2	500 nM	WT	50	11.44	32.88	2.06		3	4	DMSO	WT	30	30.78	30.28	2.54
1	7	500 nM	dTRIM37	34	9.64	55.85	2.32		2	2	500 nM	WT	54	12.72	33.42	2.72		3	4	DMSO	WT	34	34.45	30.84	2.53
1	7	500 nM	dTRIM37	38	9.73	55.43	2.07		2	2	500 nM	WT	58	12.19	31.77	2.29		3	4	DMSO	WT	38	38.45	28.09	2.36
1	7	500 nM	dTRIM37	42	11.22	56.85	2.71		2	2	500 nM	WT	62	12.64	32.18	2.23		3	4	DMSO	WT	42	40.27	29.23	2.16
1	7	500 nM	dTRIM37	46	11.77	55	2.48		2	2	500 nM	WT	66	13.05	31.71	2.69		3	4	DMSO	WT	46	44.1	31.98	2.11
1	7	500 nM	dTRIM37	50	12.85	55.02	2.1		2	2	500 nM	WT	70	12.76	30.92	2.49		3	4	DMSO	WT	50	47.11	31.6	1.97
1	7	500 nM	dTRIM37	54	14.22	55.54	2.48		2	2	500 nM	WT	74	12.89	30.83	2.39		3	4	DMSO	WT	54	49.06	31.95	2.27
1	7	500 nM	dTRIM37	58	13.22	56.12	2.23		2	2	500 nM	WT	78	13.36	30.49	2.52		3	4	DMSO	WT	58	50.69	33.27	2.64
1	7	500 nM	dTRIM37	62	13.36	55.95	2.39		2	2	500 nM	WT	82	12.73	30.07	2.19		3	4	DMSO	WT	62	50.5	32.46	2.12
1	7	500 nM	dTRIM37	66	13.57	56.67	2.46		2	2	500 nM	WT	86	13.74	31.66	2.39		3	4	DMSO	WT	66	52.08	31.4	2.1
1	7	500 nM	dTRIM37	70	13.32	55.02	2.29		2	2	500 nM	WT	90	12.74	29.11	2.16		3	4	DMSO	WT	70	55.26	32.03	2.45
1	7	500 nM	dTRIM37	74	14.83	55.65	2.18		2	2	500 nM	WT	94	13.7	31.64	2.78		3	4	DMSO	WT	74	57.12	30.87	2.24
1	7	500 nM	dTRIM37	78	14.04	55.81	2.31		2	2	500 nM	WT	98	14.05	31.94	2.38		3	4	DMSO	WT	78	59.57	29.51	2.23
1	7	500 nM	dTRIM37	82	14.46	54.22	2.16		2	3	500 nM	WT	0	17.15	7.04	2.21		3	4	DMSO	WT	82	62.15	31.66	2.25
1	7	500 nM	dTRIM37	86	17.24	54.77	2.48		2	3	500 nM	WT	4	17.25	7.07	2.68		3	4	DMSO	WT	86	63.76	31.67	2.55
1	7	500 nM	dTRIM37	90	16.01	57.3	2.55		2	3	500 nM	WT	8	16	6.9	2.01		3	4	DMSO	WT	90	64.79	29.78	2.17
1	7	500 nM	dTRIM37	94	16.37	55.58	2.37		2	3	500 nM	WT	10	2.71	6.99	2.25		3	4	DMSO	WT	94	66.91	30.56	2.77
1	7	500 nM	dTRIM37	98	16.73	56.57	2.36		2	3	500 nM	WT	14	2.8	6.74	2.37		3	4	DMSO	WT	98	67.3	28.71	2.26
1	8	500 nM	dTRIM37	0	927.64	529.17	2.87		2	3	500 nM	WT	18	2.99	7.14	2.5		3	5	DMSO	WT	0	261.41	70.3	2.45
1	8	500 nM	dTRIM37	4	923.81	532.98	2.87		2	3	500 nM	WT	22	3	6.9	2.43		3	5	DMSO	WT	4	267.33	69.37	2.5
1	8	500 nM	dTRIM37	8	914.46	530.95	2.89		2	3	500 nM	WT	26	3.11	6.43	2.29		3	5	DMSO	WT	8	266.97	71.34	2.22
1	8	500 nM	dTRIM37	10	8.21	521.7	3		2	3	500 nM	WT	30	2.75	6.58	2.38		3	5	DMSO	WT	10	10.19	72.29	2.34
1	8	500 nM	dTRIM37	14	17.72	514.87	2.87		2	3	500 nM	WT	34	2.55	6.59	2.16		3	5	DMSO	WT	14	31.62	69.69	2.38
1	8	500 nM	dTRIM37	18	23.56	506.1	3.21		2	3	500 nM	WT	38	2.93	6.99	2.45		3	5	DMSO	WT	18	45.88	69.38	2.28
1	8	500 nM	dTRIM37	22	26.07	504.25	2.98		2	3	500 nM	WT	42	3.02	6.72	2.38		3	5	DMSO	WT	22	60.11	64.63	2.19
1	8	500 nM	dTRIM37	26	28.69	489.62	2.77		2	3	500 nM	WT	46	3.02	6.45	2.44		3	5	DMSO	WT	26	71.87	67.11	2.82
1	8	500 nM	dTRIM37	30	30.41	495.41	2.59		2	3	500 nM	WT	50	3	6.34	2.26		3	5	DMSO	WT	30	82.05	60.1	2.22
1	8	500 nM	dTRIM37	34	32.88	508.99	2.72		2	3	500 nM	WT	54	3.51	7.4	2.69		3	5	DMSO	WT	34	93.93	58.21	2.25
1	8	500 nM	dTRIM37	38	34.83	497.79	2.99		2	3	500 nM	WT	58	2.88	6.71	2.14		3	5	DMSO	WT	38	107.38	59.08	2.41
1	8	500 nM	dTRIM37	42	36.79	497.73	2.87		2	3	500 nM	WT	62	2.86	6.24	2.41		3	5	DMSO	WT	42	112.52	54.75	2.42
1	8	500 nM	dTRIM37	46	37.96	488.9	2.73		2	3	500 nM	WT	66	2.91	6.21	2.5		3	5	DMSO	WT	46	129.99	57.56	2.37
1	8	500 nM	dTRIM37	50	39.96	493.86	3		2	3	500 nM	WT	70	3.2	6.57	2.48		3	5	DMSO	WT	50	139.09	57.12	2.17
1	8	500 nM	dTRIM37	54	41.49	491.02	2.62		2	3	500 nM	WT	74	2.9	6.74	2.43		3	5	DMSO	WT	54	145.02	58.14	2.36
1	8	500 nM	dTRIM37	58	43.26	494.88	2.51		2	3	500 nM	WT	78	3.25	7.14	2.36		3	5	DMSO	WT	58	154.93	55.67	2.15
1	8	500 nM	dTRIM37	62	45.24	507.11	2.64		2	3	500 nM	WT	82	2.91	6.65	2.87		3	5	DMSO	WT	62	157.52	54.53	2.23
1	8	500 nM	dTRIM37	66	45.23	492.58	2.7		2	3	500 nM	WT	86	2.49	5.65	2.08		3	5	DMSO	WT	66	155.52	56.51	3
1	8	500 nM	dTRIM37	70	46.7	506.49	2.72		2	3	500 nM	WT	90	2.86	6.42	2.41		3	5	DMSO	WT	70	161.8	57.35	2.23
1	8	500 nM	dTRIM37	74	47.89	509.71	2.76		2	3	500 nM	WT	94	2.57	5.79	1.92		3	5	DMSO	WT	74	169.29	57.22	2.24
1	8	500 nM	dTRIM37	78	49.76	511.87	2.76		2	3	500 nM	WT	98	2.79	6.76	1.97		3	5	DMSO	WT	78	176.38	57.28	2.28
1	8	500 nM	dTRIM37	82	50.93	505.1	2.7		2	4	500 nM	WT	0	357.69	65.6	3.3		3	5	DMSO	WT	82	178.85	56.38	2.28
1	8	500 nM	dTRIM37	86	51.46	496.48	2.8		2	4	500 nM	WT	4	359.49	66.32	2.75		3	5	DMSO	WT	86	183.72	60.7	2.74
1	8	500 nM	dTRIM37	90	51.54	502.35	2.74		2	4	500 nM	WT	8	362.24	58.83	2.66		3	5	DMSO	WT	90	191.78	58.95	2.36
1	8	500 nM	dTRIM37	94	52.2	498.93	2.72		2	4	500 nM	WT	10	12.73	59.56	2.63		3	5	DMSO	WT	94	202.49	59.15	2.37
1	8	500 nM	dTRIM37	98	53.93	499.32	2.72		2	4	500 nM	WT	14	18.12	65.7	2.76		3	5	DMSO	WT	98	196.11	60.06	2.37
1	9	500 nM	dTRIM37	0	1031.53	1789.24	2.33		2	4	500 nM	WT	18	18.83	63.71	2.77		3	6	DMSO	WT	0	74.19	32.38	2.13
1	9	500 nM	dTRIM37	4	1029.6	1797.05	2.67		2	4	500 nM	WT	22	18.16	64.62	2.81		3	6	DMSO	WT	4	51.69	31.58	2.14
1	9	500 nM	dTRIM37	8	1030.95	1779.08	2.21		2	4	500 nM	WT	26	18.54	67.11	2.38		3	6	DMSO	WT	8	61.27	31.53	2.01
1	9	500 nM	dTRIM37	10	11.87	1752.98	2.29		2	4	500 nM	WT	30	19.06	64.77	2.53		3	6	DMSO	WT	10	5.63	30.76	2.12
1	9	500 nM	dTRIM37	14	18.29	1784.63	2.23		2	4	500 nM	WT	34	20.63	66.6	2.93		3	6	DMSO	WT	14	10.36	30.96	2.34
1	9	500 nM	dTRIM37	18	21.51	1801.3	2.35		2	4	500 nM	WT	38	20.72	66.62	2.76		3	6	DMSO	WT	18	13.46	30.14	1.96
1	9	500 nM	dTRIM37	22	23.37	1809.66	2.17		2	4	500 nM	WT	42	20.2	63.88	2.62		3	6	DMSO	WT	22	17.79	30.72	2.49
1	9	500 nM	dTRIM37	26	25.9	1749.29	2.73		2	4	500 nM	WT	46	20.25	64.04	2.64		3	6	DMSO	WT	26	19.3	30.38	2.06
1	9	500 nM	dTRIM37	30	27.28	1737.74	2.6		2	4	500 nM	WT	50	19.65	62.17	2.19		3	6	DMSO	WT	30	21.97	31.03	2.13
1	9	500 nM	dTRIM37	34	29.03	1771.46	2.56		2	4	500 nM	WT	54	20.6	60.8	3.26		3	6	DMSO	WT	34	26.51	32.15	2.11
1	9	500 nM	dTRIM37	38	30.73	1799.54	2.5		2	4	500 nM	WT	58	19.95	62.28	2.91		3	6	DMSO	WT	38	28.15	32.09	1.84
1	9	500 nM	dTRIM37	42	31.53	1722.53	2.52		2	4	500 nM	WT	62	19.99	62.83	2.86		3	6	DMSO	WT	42	25.66	31.61	2.55
1	9	500 nM	dTRIM37	46	32.79	1726.67	2.27		2	4	500 nM	WT	66	20.84	62.71	2.87		3	6	DMSO	WT	46	28.91	30.56	2.58
1	9	500 nM	dTRIM37	50	34.61	1719.33	2.24		2	4	500 nM	WT	70	20.53	62.51	2.87		3	6	DMSO	WT	50	24.11	32.85	2.36
1	9	500 nM	dTRIM37	54	34.86	1701.48	1.95		2	4	500 nM	WT	74	21.98	65.21	2.78		3	6	DMSO	WT	54	24.62	32.28	2.16
1	9	500 nM	dTRIM37	58	36.93	1679.37	2.36		2	4	500 nM	WT	78	22.47	66.02	2.87		3	6	DMSO	WT	58	25.73	33.02	2.59
1	9	500 nM	dTRIM37	62	37.58	1687.08	2.67		2	4	500 nM	WT	82	23.11	66.4	2.93		3	6	DMSO	WT	62	24.17	31.93	2.31
1	9	500 nM	dTRIM37	66	37.8	1672.49	2.34		2	4	500 nM	WT	86	21.69	65.87	2.4		3	6	DMSO	WT	66	24.57	31.18	2.6
1	9	500 nM	dTRIM37	70	39.69	1712.96	2.34		2	4	500 nM	WT	90	22.51	65.46	2.6		3	6	DMSO	WT	70	23.36	29.36	2.03
1	9	500 nM	dTRIM37	74	40.42	1707.11	2.41		2	4	500 nM	WT	94	22.87	64.98	2.62		3	6	DMSO	WT	74	24.21	30.05	2.2
1	9	500 nM	dTRIM37	78	40.69	1746.21	2.15		2	4	500 nM	WT	98	24.19	66.01	3.06		3	6	DMSO	WT	78	24.95	31.51	2.23
1	9	500 nM	dTRIM37	82	42.32	1712.07	2.31		2	5	500 nM	WT	0	349.01	33.7	2.72		3	6	DMSO	WT	82	25.12	29.21	2.14
1	9	500 nM	dTRIM37	86	43.43	1718.85	2.49		2	5	500 nM	WT	4	348.24	34.19	2.93		3	6	DMSO	WT	86	24.67	30.97	2.19
1	9	500 nM	dTRIM37	90	44.33	1698.7	2.32		2	5	500 nM	WT	8	347.95	33.44	2.45		3	6	DMSO	WT	90	28	31.87	2.5
1	9	500 nM	dTRIM37	94	45.08	1675.59	2.64		2	5	500 nM	WT	10	14.47	32.05	2.38		3	6	DMSO	WT	94	28	31.18	2.42
1	9	500 nM	dTRIM37	98	46.19	1686.58	2.66		2	5	500 nM	WT	14	26.38	33.96	2.64		3	6	DMSO	WT	98	28.84	30.44	2.23
									2	5	500 nM	WT	18	29.32	32.98	2.63		3	7	DMSO	WT	0	386.22	60.78	2.12
									2	5	500 nM	WT	22	31.19	32.24	2.76		3	7	DMSO	WT	4	400.13	59.06	2.4
									2	5	500 nM	WT	26	31.67	32.93	2.54		3	7	DMSO	WT	8	390.83	57.91	2.72
									2	5	500 nM	WT	30	33.07	33.04	2.74		3	7	DMSO	WT	10	7.4	53.97	2.51
									2	5	500 nM	WT	34	33.58	31.64	2.09		3	7	DMSO	WT	14	24.04	56.04	2.51
									2	5	500 nM	WT	38	33.7	33.56	2.63		3	7	DMSO	WT	18	38.45	56.85	2.39
									2	5	500 nM	WT	42	35.35	33.16	2.66		3	7	DMSO	WT	22	51.47	54.8	2.48
									2	5	500 nM	WT	46	35.32	32.77	2.32		3	7	DMSO	WT	26	63.02	52.72	2.31
									2	5	500 nM	WT	50	34.92	30.72	2.6		3	7	DMSO	WT	30	70.55	48.88	2.41
									2	5	500 nM	WT	54	35.61	32.45	2.79		3	7	DMSO	WT	34	80	56.22	2.6
									2	5	500 nM	WT	58	35.36	32.33	2.42		3	7	DMSO	WT	38	86.74	54.2	2.25
									2	5	500 nM	WT	62	36.27	32.73	2.74		3	7	DMSO	WT	42	96.63	56.28	2.43
									2	5	500 nM	WT	66	36.77	32.8	2.54		3	7	DMSO	WT	46	103.55	57.78	2.1
									2	5	500 nM	WT	70	37.1	31.26	3.01		3	7	DMSO	WT	50	108.58	58.75	2.48
									2	5	500 nM	WT	74	37.25	32.86	2.81		3	7	DMSO	WT	54	111.46	58.25	2.18
									2	5	500 nM	WT	78	37.82	33.33	2.7		3	7	DMSO	WT	58	120.46	59.45	2.23
									2	5	500 nM	WT	82	38.57	32.05	2.56		3	7	DMSO	WT	62	119.27	59.26	2.4
									2	5	500 nM	WT	86	38.51	30.71	2.76		3	7	DMSO	WT	66	124.02	58.86	2.32
									2	5	500 nM	WT	90	38.41	29.61	2.42		3	7	DMSO	WT	70	131.21	56.44	2.22
									2	5	500 nM	WT	94	40.91	30.05	2.77		3	7	DMSO	WT	74	138.39	57.72	2.64
									2	5	500 nM	WT	98	40.82	27.78	2.5		3	7	DMSO	WT	78	146.02	55.75	2.69
									2	6	500 nM	WT	0	386.35	110.14	2.29		3	7	DMSO	WT	82	144.46	57.17	2.34
									2	6	500 nM	WT	4	391.33	113.67	2.12		3	7	DMSO	WT	86	151.94	57.2	2.42
									2	6	500 nM	WT	8	391.74	110.58	2.23		3	7	DMSO	WT	90	152.5	57.78	2.44
									2	6	500 nM	WT	10	12.9	107.18	2.28		3	7	DMSO	WT	94	159.77	58.47	2.6
									2	6	500 nM	WT	14	18.96	106.47	2.52		3	7	DMSO	WT	98	161.19	58.23	2.49
									2	6	500 nM	WT	18	21.34	110.02	2.51		3	8	DMSO	WT	0	120.4	14.78	2.34
									2	6	500 nM	WT	22	21.42	110.35	2.33		3	8	DMSO	WT	4	118.17	15.32	2.63
									2	6	500 nM	WT	26	23.07	107.26	2.52		3	8	DMSO	WT	8	113.75	15.06	2.59
									2	6	500 nM	WT	30	24.66	108.1	2.33		3	8	DMSO	WT	10	4.59	13.55	2.77
									2	6	500 nM	WT	34	24.93	109.6	2.33		3	8	DMSO	WT	14	9.03	16.5	2.61
									2	6	500 nM	WT	38	25.75	109.49	2.27		3	8	DMSO	WT	18	13.82	15.66	3.02
									2	6	500 nM	WT	42	26.49	109.98	2.43		3	8	DMSO	WT	22	19.69	14.64	2.74
									2	6	500 nM	WT	46	28.28	111.58	2.42		3	8	DMSO	WT	26	21.65	13.13	2.65
									2	6	500 nM	WT	50	28.42	109.97	2.48		3	8	DMSO	WT	30	23.02	13.03	2.73
									2	6	500 nM	WT	54	28.99	111.7	2.38		3	8	DMSO	WT	34	26.35	13.42	2.43
									2	6	500 nM	WT	58	30.11	106.86	2.39		3	8	DMSO	WT	38	31.55	16.37	3.05
									2	6	500 nM	WT	62	30.44	108.16	2.19		3	8	DMSO	WT	42	32.06	13.49	2.18
									2	6	500 nM	WT	66	31.38	104.65	2.3		3	8	DMSO	WT	46	34.78	13.85	2.62
									2	6	500 nM	WT	70	31.63	105.88	2.51		3	8	DMSO	WT	50	35.28	13.23	2.52
									2	6	500 nM	WT	74	32.42	106.53	2.37		3	8	DMSO	WT	54	37.1	12.69	2.17
									2	6	500 nM	WT	78	33.32	105.36	2.46		3	8	DMSO	WT	58	39.96	13.79	2.78
									2	6	500 nM	WT	82	33.95	106.42	2.59		3	8	DMSO	WT	62	41.17	12.22	2.32
									2	6	500 nM	WT	86	34.35	106.11	2.35		3	8	DMSO	WT	66	41.65	12.92	2.93
									2	6	500 nM	WT	90	35.16	107.14	2.76		3	8	DMSO	WT	70	43.37	11.77	2.41
									2	6	500 nM	WT	94	34.02	102.66	2.2		3	8	DMSO	WT	74	43.65	13.54	2.61
									2	6	500 nM	WT	98	35.08	103.5	2.68		3	8	DMSO	WT	78	46.17	12.95	2.18
									2	7	500 nM	WT	0	729.71	433.01	2.09		3	8	DMSO	WT	82	47.48	11.88	2.28
									2	7	500 nM	WT	4	723.67	442.28	2.5		3	8	DMSO	WT	86	50.12	12.08	2.51
									2	7	500 nM	WT	8	749.62	444.55	2.41		3	8	DMSO	WT	90	54.64	12.3	2.71
									2	7	500 nM	WT	10	16.51	427.02	2.59		3	8	DMSO	WT	94	54.53	11.52	2.48
									2	7	500 nM	WT	14	20.78	406.68	1.87		3	8	DMSO	WT	98	55.14	13.45	2.59
									2	7	500 nM	WT	18	22.93	401.27	2.44		3	9	DMSO	WT	0	98.12	33.66	2.77
									2	7	500 nM	WT	22	24.99	410.62	2.04		3	9	DMSO	WT	4	92.23	33.92	2.44
									2	7	500 nM	WT	26	27.3	440.75	2.65		3	9	DMSO	WT	8	93.25	33.23	1.88
									2	7	500 nM	WT	30	27.82	419.3	2.26		3	9	DMSO	WT	10	3.11	33.16	2
									2	7	500 nM	WT	34	29.33	435.15	2.31		3	9	DMSO	WT	14	7.91	34.75	2.6
									2	7	500 nM	WT	38	28.49	420	2.35		3	9	DMSO	WT	18	9.04	35.01	2.28
									2	7	500 nM	WT	42	29.99	420.76	2.44		3	9	DMSO	WT	22	12.65	35.1	2.19
									2	7	500 nM	WT	46	30.71	398.13	2.74		3	9	DMSO	WT	26	15.66	34.61	2.41
									2	7	500 nM	WT	50	32.83	409.91	2.34		3	9	DMSO	WT	30	19.42	32.92	2.14
									2	7	500 nM	WT	54	32	398.22	2.51		3	9	DMSO	WT	34	21.71	33.86	2.43
									2	7	500 nM	WT	58	32.13	422.8	2.07		3	9	DMSO	WT	38	24.96	34.2	2.31
									2	7	500 nM	WT	62	34.2	407.71	2.13		3	9	DMSO	WT	42	27.11	32.9	2.43
									2	7	500 nM	WT	66	34.65	398.19	2.37		3	9	DMSO	WT	46	30.02	32.23	2.39
									2	7	500 nM	WT	70	36.94	424.26	2.32		3	9	DMSO	WT	50	33.44	31.69	2.36
									2	7	500 nM	WT	74	36.32	401.2	2.35		3	9	DMSO	WT	54	35.02	30.92	2.56
									2	7	500 nM	WT	78	38.56	410.03	2.69		3	9	DMSO	WT	58	34.24	31.03	2.22
									2	7	500 nM	WT	82	37.31	409.84	2.26		3	9	DMSO	WT	62	37.11	30.67	2.43
									2	7	500 nM	WT	86	38.85	399.14	2.52		3	9	DMSO	WT	66	38.72	30.49	2.31
									2	7	500 nM	WT	90	38.88	387.65	2.25		3	9	DMSO	WT	70	41.13	31.22	2.2
									2	7	500 nM	WT	94	41.02	396.28	2.29		3	9	DMSO	WT	74	42.88	30.53	2.89
									2	7	500 nM	WT	98	41.48	397.7	2.36		3	9	DMSO	WT	78	43.44	29.77	2.08
									2	8	500 nM	WT	0	1549.49	198.95	4.87		3	9	DMSO	WT	82	41.49	32.05	2.22
									2	8	500 nM	WT	4	1545.35	208.51	4.71		3	9	DMSO	WT	86	44.84	31.18	2.14
									2	8	500 nM	WT	8	1537.04	205.33	4.86		3	9	DMSO	WT	90	46.86	31.4	2.36
									2	8	500 nM	WT	10	41.37	212.23	4.92		3	9	DMSO	WT	94	48.06	31.41	2.28
									2	8	500 nM	WT	14	49.48	212.28	4.6		3	9	DMSO	WT	98	48.69	32.59	2.18
									2	8	500 nM	WT	18	53.43	196.57	4.79		3	10	DMSO	WT	0	168.09	108.36	2.85
									2	8	500 nM	WT	22	54.96	198.46	4.46		3	10	DMSO	WT	4	158.67	97.85	2.21
									2	8	500 nM	WT	26	57.78	197.44	4.49		3	10	DMSO	WT	8	149.36	110.41	2.27
									2	8	500 nM	WT	30	57.01	186.74	4.61		3	10	DMSO	WT	10	8.15	103.54	2
									2	8	500 nM	WT	34	60.86	181.5	4.33		3	10	DMSO	WT	14	18.33	104.65	2.18
									2	8	500 nM	WT	38	60.52	194.61	4.46		3	10	DMSO	WT	18	27.66	101.32	2.24
									2	8	500 nM	WT	42	62.63	197.36	4.38		3	10	DMSO	WT	22	35.49	110.3	2.22
									2	8	500 nM	WT	46	62.6	204.6	4.68		3	10	DMSO	WT	26	43.49	102.74	2.48
									2	8	500 nM	WT	50	59.05	199.75	4.69		3	10	DMSO	WT	30	52.13	109.28	2.56
									2	8	500 nM	WT	54	57.89	210.75	4.59		3	10	DMSO	WT	34	55.57	97.29	2.43
									2	8	500 nM	WT	58	57.44	212.78	4.72		3	10	DMSO	WT	38	61.4	103.62	2.25
									2	8	500 nM	WT	62	61.02	213.45	4.57		3	10	DMSO	WT	42	65.23	101.52	2.21
									2	8	500 nM	WT	66	58.12	213.36	4.76		3	10	DMSO	WT	46	60.46	105.61	2.61
									2	8	500 nM	WT	70	56.08	209.25	4.75		3	10	DMSO	WT	50	68.77	111.28	2.6
									2	8	500 nM	WT	74	58.93	208.54	5.2		3	10	DMSO	WT	54	62.32	104.91	2.53
									2	8	500 nM	WT	78	60.17	205.27	4.67		3	10	DMSO	WT	58	72.62	105.61	2.09
									2	8	500 nM	WT	82	64.74	211.67	4.81		3	10	DMSO	WT	62	72.01	99	1.93
									2	8	500 nM	WT	86	64.17	213.02	4.51		3	10	DMSO	WT	66	79.98	103.98	2.56
									2	8	500 nM	WT	90	70.62	207.62	4.45		3	10	DMSO	WT	70	81.68	100.65	2.65
									2	8	500 nM	WT	94	74.8	210.49	5.1		3	10	DMSO	WT	74	91.79	97.28	2.41
									2	8	500 nM	WT	98	78.7	202.72	4.85		3	10	DMSO	WT	78	92.88	99.81	2.36
									2	9	500 nM	WT	0	212.18	125.5	2.9		3	10	DMSO	WT	82	92.22	98.68	2.4
									2	9	500 nM	WT	4	218.18	126.27	2.29		3	10	DMSO	WT	86	82.89	93.23	2.34
									2	9	500 nM	WT	8	209.67	124.35	2.92		3	10	DMSO	WT	90	70.54	102.62	2.05
									2	9	500 nM	WT	10	6.98	121.83	2.75		3	10	DMSO	WT	94	97.42	95.4	2.2
									2	9	500 nM	WT	14	10.79	124.6	2.67		3	10	DMSO	WT	98	69.34	98.77	2.32
									2	9	500 nM	WT	18	12.17	124.04	2.32		3	11	DMSO	WT	0	108.97	33.5	2.27
									2	9	500 nM	WT	22	13.64	124.88	2.59		3	11	DMSO	WT	4	108.32	33.68	2.19
									2	9	500 nM	WT	26	14.83	124.58	2.71		3	11	DMSO	WT	8	108.2	34.47	2.34
									2	9	500 nM	WT	30	16.05	124.03	2.52		3	11	DMSO	WT	10	3.98	34.74	2.73
									2	9	500 nM	WT	34	17.31	122.62	2.58		3	11	DMSO	WT	14	7.06	33.55	2.13
									2	9	500 nM	WT	38	18.96	123.99	2.74		3	11	DMSO	WT	18	10.67	34.85	2.45
									2	9	500 nM	WT	42	18.75	119.58	2.72		3	11	DMSO	WT	22	13.15	34.69	2.48
									2	9	500 nM	WT	46	19.28	117.35	2.7		3	11	DMSO	WT	26	15.92	34.7	2.19
									2	9	500 nM	WT	50	21.34	120.13	2.76		3	11	DMSO	WT	30	19.03	33.54	2.39
									2	9	500 nM	WT	54	20.74	121.83	2.7		3	11	DMSO	WT	34	20.24	34.65	2
									2	9	500 nM	WT	58	21.7	119.6	2.68		3	11	DMSO	WT	38	23.93	35.97	2.43
									2	9	500 nM	WT	62	22.91	118.35	2.64		3	11	DMSO	WT	42	25.53	34.23	2.63
									2	9	500 nM	WT	66	23.16	121.08	2.78		3	11	DMSO	WT	46	26.66	33.73	2.09
									2	9	500 nM	WT	70	24	119.8	2.35		3	11	DMSO	WT	50	27.95	30.13	2.38
									2	9	500 nM	WT	74	24.56	120.91	2.64		3	11	DMSO	WT	54	30.86	31.61	2.88
									2	9	500 nM	WT	78	25.08	120.75	2.68		3	11	DMSO	WT	58	30.26	30.18	2.45
									2	9	500 nM	WT	82	26.12	121.6	2.73		3	11	DMSO	WT	62	32	32.03	2.28
									2	9	500 nM	WT	86	27.78	118.48	2.8		3	11	DMSO	WT	66	33.31	30.88	2.57
									2	9	500 nM	WT	90	26.29	120.33	2.5		3	11	DMSO	WT	70	31.61	27.79	2.4
									2	9	500 nM	WT	94	28.05	120.38	2.69		3	11	DMSO	WT	74	32.37	28.18	2.4
									2	9	500 nM	WT	98	28.64	120.58	2.56		3	11	DMSO	WT	78	32.02	28.94	2.17
									2	10	500 nM	WT	0	918.42	124.72	2.51		3	11	DMSO	WT	82	33.68	29.59	2.1
									2	10	500 nM	WT	4	906.66	120.59	2.38		3	11	DMSO	WT	86	35.55	30.71	2.11
									2	10	500 nM	WT	8	938.27	125.22	2.48		3	11	DMSO	WT	90	36.63	32.46	2.39
									2	10	500 nM	WT	10	25.84	116.44	2.23		3	11	DMSO	WT	94	39.86	32.24	2.6
									2	10	500 nM	WT	14	37.65	125.4	2.67		3	11	DMSO	WT	98	39.44	31.67	2.14
									2	10	500 nM	WT	18	38.82	123.78	2.16		3	12	DMSO	WT	0	339.23	82.84	2.14
									2	10	500 nM	WT	22	41.1	119.43	2.55		3	12	DMSO	WT	4	353.4	82.25	2.17
									2	10	500 nM	WT	26	40.9	112.91	2.61		3	12	DMSO	WT	8	356.15	84.6	2.47
									2	10	500 nM	WT	30	44.55	122.95	2.4		3	12	DMSO	WT	10	6.9	82.79	2.34
									2	10	500 nM	WT	34	47.29	120.32	2.62		3	12	DMSO	WT	14	25.61	84.31	2.47
									2	10	500 nM	WT	38	48.45	123.09	2.41		3	12	DMSO	WT	18	40.88	83.19	2.18
									2	10	500 nM	WT	42	48.31	124.58	2.4		3	12	DMSO	WT	22	55.9	84.34	2.56
									2	10	500 nM	WT	46	46.89	121	2.51		3	12	DMSO	WT	26	66.17	82.57	2.15
									2	10	500 nM	WT	50	45.59	114.29	2.64		3	12	DMSO	WT	30	74.1	82.93	2.44
									2	10	500 nM	WT	54	48.81	119.09	2.63		3	12	DMSO	WT	34	78.69	82.12	2.28
									2	10	500 nM	WT	58	48.68	123.48	2.83		3	12	DMSO	WT	38	84.41	81.55	1.91
									2	10	500 nM	WT	62	51.33	123.83	2.78		3	12	DMSO	WT	42	93.36	83.69	2.45
									2	10	500 nM	WT	66	51.82	126.34	2.68		3	12	DMSO	WT	46	94.88	83.2	2.53
									2	10	500 nM	WT	70	52.37	125.5	2.66		3	12	DMSO	WT	50	101.33	83.21	2.39
									2	10	500 nM	WT	74	52.31	125.93	2.13		3	12	DMSO	WT	54	109.34	82.4	2.45
									2	10	500 nM	WT	78	53.47	124.71	2.51		3	12	DMSO	WT	58	110.84	81.29	2.36
									2	10	500 nM	WT	82	49.24	127.22	2.57		3	12	DMSO	WT	62	114.53	81.23	2.21
									2	10	500 nM	WT	86	52.98	126.78	2.54		3	12	DMSO	WT	66	132.07	81.24	2.18
									2	10	500 nM	WT	90	49.54	124.85	2.63		3	12	DMSO	WT	70	120.47	80.86	2.16
									2	10	500 nM	WT	94	49.03	123.11	2.24		3	12	DMSO	WT	74	126.6	79.38	2.35
									2	10	500 nM	WT	98	51.84	123.95	2.58		3	12	DMSO	WT	78	132.01	81.13	2.29
									2	11	500 nM	WT	0	271.92	230.26	2.57		3	12	DMSO	WT	82	133.23	81.25	2.67
									2	11	500 nM	WT	4	271.11	223.26	2.45		3	12	DMSO	WT	86	140.83	80.45	1.97
									2	11	500 nM	WT	8	271.33	220.72	2.37		3	12	DMSO	WT	90	149.28	80.39	2.41
									2	11	500 nM	WT	10	7.67	219.64	2.49		3	12	DMSO	WT	94	155.86	79.69	2.53
									2	11	500 nM	WT	14	11.92	221.71	2.75		3	12	DMSO	WT	98	157.79	80.56	2.43
									2	11	500 nM	WT	18	14.1	219.8	2.69		3	13	DMSO	WT	0	89.49	67.18	2.1
									2	11	500 nM	WT	22	15.72	228.81	2.84		3	13	DMSO	WT	4	90.8	71.54	2.16
									2	11	500 nM	WT	26	15.82	223.63	2.1		3	13	DMSO	WT	8	91.93	72.37	2.15
									2	11	500 nM	WT	30	17.6	225.19	2.79		3	13	DMSO	WT	10	6.08	66.22	2.31
									2	11	500 nM	WT	34	17.6	229.05	2.6		3	13	DMSO	WT	14	12.23	67.37	2.3
									2	11	500 nM	WT	38	19.02	224.96	2.68		3	13	DMSO	WT	18	17.4	72.63	2.42
									2	11	500 nM	WT	42	18.56	225.66	2.33		3	13	DMSO	WT	22	20.85	70.81	2.7
									2	11	500 nM	WT	46	19.5	222.55	2.53		3	13	DMSO	WT	26	24.06	70.49	2.37
									2	11	500 nM	WT	50	20.28	220.31	2.44		3	13	DMSO	WT	30	26.33	71.19	2.55
									2	11	500 nM	WT	54	21.26	227.05	2.66		3	13	DMSO	WT	34	28.89	72.85	2.19
									2	11	500 nM	WT	58	21.83	226.08	2.51		3	13	DMSO	WT	38	32.27	70.32	2.51
									2	11	500 nM	WT	62	22.06	226.85	2.44		3	13	DMSO	WT	42	34.33	70.46	2.34
									2	11	500 nM	WT	66	23.18	217.77	2.79		3	13	DMSO	WT	46	36.91	70.6	2.34
									2	11	500 nM	WT	70	22.51	218.84	2.24		3	13	DMSO	WT	50	38.43	69.93	2.6
									2	11	500 nM	WT	74	23.4	223.88	2.35		3	13	DMSO	WT	54	36.82	67.57	2.6
									2	11	500 nM	WT	78	24.27	224.95	2.79		3	13	DMSO	WT	58	35.01	67.17	2.08
									2	11	500 nM	WT	82	23.61	225.62	2.24		3	13	DMSO	WT	62	33.66	68.51	2.35
									2	11	500 nM	WT	86	23.77	222.2	2.45		3	13	DMSO	WT	66	38.17	65.58	2.52
									2	11	500 nM	WT	90	25.16	223.01	2.54		3	13	DMSO	WT	70	42.06	64.36	1.95
									2	11	500 nM	WT	94	25.36	222.16	2.79		3	13	DMSO	WT	74	45	67.67	1.84
									2	11	500 nM	WT	98	25.68	224.52	2.72		3	13	DMSO	WT	78	49.05	68.73	2.22
									2	12	500 nM	WT	0	168.62	103.02	2.79		3	13	DMSO	WT	82	51.03	69.71	2.54
									2	12	500 nM	WT	4	177.4	101.98	2.32		3	13	DMSO	WT	86	52.52	68.87	2.14
									2	12	500 nM	WT	8	172.48	97.65	2.68		3	13	DMSO	WT	90	52.73	68.38	2.17
									2	12	500 nM	WT	10	5.8	92.36	2.63		3	13	DMSO	WT	94	52.2	69.59	2.39
									2	12	500 nM	WT	14	9.39	100.99	3.09		3	13	DMSO	WT	98	54.75	68.91	2.67
									2	12	500 nM	WT	18	9.75	100.91	2.47
									2	12	500 nM	WT	22	9.53	97.36	2.19
									2	12	500 nM	WT	26	9.79	96.85	2.39
									2	12	500 nM	WT	30	10.69	96.3	2.54
									2	12	500 nM	WT	34	11.08	99.23	2.39
									2	12	500 nM	WT	38	12.33	111.68	2.67
									2	12	500 nM	WT	42	11.85	95.27	2.64
									2	12	500 nM	WT	46	12.56	90.51	2.65
									2	12	500 nM	WT	50	12.1	86.57	2.7
									2	12	500 nM	WT	54	12.55	101.76	2.82
									2	12	500 nM	WT	58	12.79	96.26	2.96
									2	12	500 nM	WT	62	12.07	107.96	2.13
									2	12	500 nM	WT	66	13.01	104.93	2.32
									2	12	500 nM	WT	70	13.29	94.93	2.46
									2	12	500 nM	WT	74	14.05	103.89	2.75
									2	12	500 nM	WT	78	12.34	101	2.38
									2	12	500 nM	WT	82	13.14	94.35	2.36
									2	12	500 nM	WT	86	12.63	104.58	2.23
									2	12	500 nM	WT	90	12.6	100.58	2.63
									2	12	500 nM	WT	94	12.79	106.9	2.58
									2	12	500 nM	WT	98	13.04	106.3	2.65
									2	13	500 nM	WT	0	108.02	61.71	5.12
									2	13	500 nM	WT	4	107.27	61.64	4.84
									2	13	500 nM	WT	8	107.84	60.19	5.46
									2	13	500 nM	WT	10	3.93	59.63	5.18
									2	13	500 nM	WT	14	4.68	61.07	5.91
									2	13	500 nM	WT	18	4.68	60.37	4.67
									2	13	500 nM	WT	22	4.72	58.97	5.26
									2	13	500 nM	WT	26	5.26	58.77	5.63
									2	13	500 nM	WT	30	5	56.08	6.14
									2	13	500 nM	WT	34	4.08	56.05	5.97
									2	13	500 nM	WT	38	5.02	56.27	5.83
									2	13	500 nM	WT	42	4.84	56.98	5.26
									2	13	500 nM	WT	46	4.89	57.13	4.35
									2	13	500 nM	WT	50	5.28	57.53	5.08
									2	13	500 nM	WT	54	4.99	57.31	5.1
									2	13	500 nM	WT	58	4.93	55.25	5.1
									2	13	500 nM	WT	62	5.15	57.43	5.67
									2	13	500 nM	WT	66	4.81	55.62	4.78
									2	13	500 nM	WT	70	5.95	56.57	5.48
									2	13	500 nM	WT	74	4.67	55.76	4.01
									2	13	500 nM	WT	78	4.87	55.36	3.89
									2	13	500 nM	WT	82	4.98	52.98	3.85
									2	13	500 nM	WT	86	5.07	52.15	3.84
									2	13	500 nM	WT	90	5.16	53.07	4.15
									2	13	500 nM	WT	94	5.16	52.75	4.12
									2	13	500 nM	WT	98	5.2	51.39	4.14

## Sheet: SuppFigure7_1I
Replicate	Technical replicate	Condition	siRNA	Time (s)	ROI1	ROI2	ROI3		Replicate	Technical replicate	Condition	siRNA	Time (s)	ROI1	ROI2	ROI1		Replicate	Technical replicate	Condition	siRNA	Time (s)	ROI1	ROI2	ROI3
1	1	DMSO	CON	0	243.27	53.02	2.64		2	1	DMSO	CON	0	195.96	368.54	2.76		3	1	DMSO	CON	0	406.43	262.47	3.08
1	1	DMSO	CON	4	235.45	47.79	2.11		2	1	DMSO	CON	4	188.81	368.74	2.5		3	1	DMSO	CON	4	415.22	261.67	2.29
1	1	DMSO	CON	8	239.75	54.88	2.32		2	1	DMSO	CON	8	162.13	387.49	2.69		3	1	DMSO	CON	8	418.67	261.07	2.76
1	1	DMSO	CON	10	5.37	44.57	1.95		2	1	DMSO	CON	10	5.67	359.94	2.8		3	1	DMSO	CON	10	14.26	243.92	2.57
1	1	DMSO	CON	14	13.54	45.95	2.14		2	1	DMSO	CON	14	14.34	375.99	2.81		3	1	DMSO	CON	14	32.9	253.79	2.37
1	1	DMSO	CON	18	21.4	54.12	2.29		2	1	DMSO	CON	18	20.91	361.18	2.55		3	1	DMSO	CON	18	46.87	251.28	2.79
1	1	DMSO	CON	22	24.43	58.7	2.43		2	1	DMSO	CON	22	26.96	372.52	2.55		3	1	DMSO	CON	22	57.57	248.19	2.69
1	1	DMSO	CON	26	27.57	51.96	2.4		2	1	DMSO	CON	26	33	371.84	2.62		3	1	DMSO	CON	26	69.9	252.32	2.74
1	1	DMSO	CON	30	29.48	52.81	2.33		2	1	DMSO	CON	30	35.92	354.69	2.53		3	1	DMSO	CON	30	79.41	241.82	2.48
1	1	DMSO	CON	34	33.4	51.68	3		2	1	DMSO	CON	34	43	353.89	2.45		3	1	DMSO	CON	34	88.53	241.55	2.32
1	1	DMSO	CON	38	36.98	43.73	2.04		2	1	DMSO	CON	38	45.71	319.04	2.51		3	1	DMSO	CON	38	98.94	255.19	2.52
1	1	DMSO	CON	42	36.61	47.3	2.41		2	1	DMSO	CON	42	52.4	334.33	2.79		3	1	DMSO	CON	42	102.04	244.95	2.56
1	1	DMSO	CON	46	41.79	48.02	2.24		2	1	DMSO	CON	46	55.17	336.61	2.57		3	1	DMSO	CON	46	109.74	245.1	2.38
1	1	DMSO	CON	50	46.25	45.11	2.39		2	1	DMSO	CON	50	58.4	327.01	2.48		3	1	DMSO	CON	50	115.56	237.78	2.27
1	1	DMSO	CON	54	47	47.5	2.56		2	1	DMSO	CON	54	62.73	325.44	2.67		3	1	DMSO	CON	54	116.6	240.94	2.69
1	1	DMSO	CON	58	45.86	46.69	2.2		2	1	DMSO	CON	58	65.89	304.2	2.6		3	1	DMSO	CON	58	125.79	250.37	2.25
1	1	DMSO	CON	62	51.57	45.14	1.93		2	1	DMSO	CON	62	65.85	305.61	2.43		3	1	DMSO	CON	62	123.13	251.5	2.43
1	1	DMSO	CON	66	46.71	44.96	2.72		2	1	DMSO	CON	66	69.34	303.14	2.64		3	1	DMSO	CON	66	129.72	247.56	2.83
1	1	DMSO	CON	70	47.53	52	2.42		2	1	DMSO	CON	70	73.15	319.93	2.73		3	1	DMSO	CON	70	139.07	243.41	2.35
1	1	DMSO	CON	74	50.89	47.29	2.31		2	1	DMSO	CON	74	74.24	316.91	2.79		3	1	DMSO	CON	74	147.02	240.78	2.65
1	1	DMSO	CON	78	44.63	57.37	2.17		2	1	DMSO	CON	78	72.8	321.65	2.8		3	1	DMSO	CON	78	145.58	231.05	2.42
1	1	DMSO	CON	82	48.38	59.55	2.27		2	1	DMSO	CON	82	72.1	299.7	2.64		3	1	DMSO	CON	82	152.26	232.57	2.44
1	1	DMSO	CON	86	54.14	64.91	2.87		2	1	DMSO	CON	86	62.67	294.97	2.68		3	1	DMSO	CON	86	158.31	227.66	2.51
1	1	DMSO	CON	90	58.49	58.87	2.15		2	1	DMSO	CON	90	74.66	279.74	2.6		3	1	DMSO	CON	90	168.93	193.44	2.27
1	1	DMSO	CON	94	59.89	61.3	2.37		2	1	DMSO	CON	94	69.48	281.44	2.68		3	1	DMSO	CON	94	180.18	202.92	2.27
1	1	DMSO	CON	98	61.03	64.89	2.27		2	1	DMSO	CON	98	71.54	279.16	2.87		3	1	DMSO	CON	98	183.68	210.93	3.06
1	2	DMSO	CON	0	78.78	33.57	2.36		2	2	DMSO	CON	0	139.89	137.8	2.87		3	2	DMSO	CON	0	330.63	214.81	4.68
1	2	DMSO	CON	4	84.56	33.96	2.56		2	2	DMSO	CON	4	140.18	133.44	2.77		3	2	DMSO	CON	4	315.31	211.74	4.71
1	2	DMSO	CON	8	83.09	34.15	2.63		2	2	DMSO	CON	8	146.7	135.41	2.75		3	2	DMSO	CON	8	310.82	208.78	4.34
1	2	DMSO	CON	10	7.95	30.52	2.65		2	2	DMSO	CON	10	6.18	132.74	2.85		3	2	DMSO	CON	10	9.99	202.31	5.04
1	2	DMSO	CON	14	12.97	31.27	2.52		2	2	DMSO	CON	14	13.01	132.25	2.82		3	2	DMSO	CON	14	25.79	210.24	5.38
1	2	DMSO	CON	18	16.78	27.49	2.43		2	2	DMSO	CON	18	18.35	135.04	3.12		3	2	DMSO	CON	18	36.43	207.08	4.91
1	2	DMSO	CON	22	17.86	28.81	2.11		2	2	DMSO	CON	22	22.08	133.07	2.67		3	2	DMSO	CON	22	45.86	206.21	4.35
1	2	DMSO	CON	26	20.22	27.5	2.12		2	2	DMSO	CON	26	26.42	129.47	3.01		3	2	DMSO	CON	26	53.81	203.7	4.96
1	2	DMSO	CON	30	22.14	27.55	2.2		2	2	DMSO	CON	30	30.04	127.74	2.53		3	2	DMSO	CON	30	62.26	206.95	4.77
1	2	DMSO	CON	34	23.99	27.83	1.96		2	2	DMSO	CON	34	34.2	129.77	2.87		3	2	DMSO	CON	34	66.14	205.71	4.94
1	2	DMSO	CON	38	26.08	33.56	2.36		2	2	DMSO	CON	38	37.06	132.36	2.91		3	2	DMSO	CON	38	74.36	204.68	4.63
1	2	DMSO	CON	42	27.91	33.06	2.44		2	2	DMSO	CON	42	39.73	131.66	2.75		3	2	DMSO	CON	42	79.48	211.8	4.35
1	2	DMSO	CON	46	28.74	30.71	2.22		2	2	DMSO	CON	46	42.67	129.28	2.97		3	2	DMSO	CON	46	88	193.49	4.74
1	2	DMSO	CON	50	28.49	27.83	2.06		2	2	DMSO	CON	50	44.68	125.62	2.81		3	2	DMSO	CON	50	95.88	204.81	4.79
1	2	DMSO	CON	54	29.51	28.3	2.44		2	2	DMSO	CON	54	48.16	129.2	2.85		3	2	DMSO	CON	54	101.25	199.06	5.12
1	2	DMSO	CON	58	31.61	29.7	2.48		2	2	DMSO	CON	58	49.54	127.96	2.91		3	2	DMSO	CON	58	111.68	200.07	5.02
1	2	DMSO	CON	62	32.72	29.48	2.53		2	2	DMSO	CON	62	50.54	123.34	2.59		3	2	DMSO	CON	62	114.28	198.33	4.41
1	2	DMSO	CON	66	33.63	30.59	2.34		2	2	DMSO	CON	66	53.65	123.21	2.87		3	2	DMSO	CON	66	116.33	199.09	5.21
1	2	DMSO	CON	70	34.89	32.42	2.28		2	2	DMSO	CON	70	55.34	120.42	3.24		3	2	DMSO	CON	70	124.62	192.97	4.62
1	2	DMSO	CON	74	33.88	31.93	2.14		2	2	DMSO	CON	74	58.26	123.33	3.31		3	2	DMSO	CON	74	126.8	194.51	3.98
1	2	DMSO	CON	78	35.07	30.93	2.19		2	2	DMSO	CON	78	59.51	121.94	3		3	2	DMSO	CON	78	128.26	193.79	4.29
1	2	DMSO	CON	82	35.09	31.57	2.58		2	2	DMSO	CON	82	60.53	121.27	2.91		3	2	DMSO	CON	82	133.92	188.54	4.19
1	2	DMSO	CON	86	36.23	31.06	2.26		2	2	DMSO	CON	86	62.12	121.56	3.03		3	2	DMSO	CON	86	136.87	190.19	4.77
1	2	DMSO	CON	90	37.02	33.24	2.59		2	2	DMSO	CON	90	62.53	121.91	3.08		3	2	DMSO	CON	90	141.94	192.93	4.34
1	2	DMSO	CON	94	37.88	34.99	2.35		2	2	DMSO	CON	94	64.38	121.7	3.22		3	2	DMSO	CON	94	140.86	188.18	4.3
1	2	DMSO	CON	98	36.92	34.46	1.99		2	2	DMSO	CON	98	66.19	122.35	2.89		3	2	DMSO	CON	98	150.27	184.78	4.54
1	3	DMSO	CON	0	704.92	523.92	2.42		2	3	DMSO	CON	0	100.42	64.35	2.51		3	3	DMSO	CON	0	386.62	444.86	9.38
1	3	DMSO	CON	4	675.15	508.83	2.62		2	3	DMSO	CON	4	100.72	65.32	2.55		3	3	DMSO	CON	4	387.92	446.9	9.61
1	3	DMSO	CON	8	694.15	543.51	2.42		2	3	DMSO	CON	8	100.75	61.46	2.5		3	3	DMSO	CON	8	374.02	445.85	9.53
1	3	DMSO	CON	10	20.38	539.19	2.34		2	3	DMSO	CON	10	13.66	58.24	2.46		3	3	DMSO	CON	10	23.48	439.58	9.04
1	3	DMSO	CON	14	67.25	555.41	2.46		2	3	DMSO	CON	14	22.23	60.44	2.65		3	3	DMSO	CON	14	54.14	440.47	9.45
1	3	DMSO	CON	18	89.2	536.6	2.38		2	3	DMSO	CON	18	26.22	61.75	2.57		3	3	DMSO	CON	18	72.38	442.07	9.96
1	3	DMSO	CON	22	125.82	539.89	2.67		2	3	DMSO	CON	22	29.93	62.79	2.31		3	3	DMSO	CON	22	87.19	442.92	9.68
1	3	DMSO	CON	26	156.45	559.05	2.5		2	3	DMSO	CON	26	31.41	59.88	2.25		3	3	DMSO	CON	26	100.8	439.78	9.52
1	3	DMSO	CON	30	181.36	543.97	2.47		2	3	DMSO	CON	30	33.94	58.4	2.18		3	3	DMSO	CON	30	113.38	441.37	10.25
1	3	DMSO	CON	34	211.72	534.91	2.3		2	3	DMSO	CON	34	35.53	61.66	2.33		3	3	DMSO	CON	34	125.58	442.23	10.05
1	3	DMSO	CON	38	220.36	554.88	2.37		2	3	DMSO	CON	38	37.9	60.84	2.32		3	3	DMSO	CON	38	134.95	434.03	9.6
1	3	DMSO	CON	42	225.16	519.2	2.52		2	3	DMSO	CON	42	38.96	60.05	2.49		3	3	DMSO	CON	42	142.76	434.06	9.88
1	3	DMSO	CON	46	250.19	521.39	2.5		2	3	DMSO	CON	46	40.77	61.57	2.7		3	3	DMSO	CON	46	147.14	434.23	9.25
1	3	DMSO	CON	50	260.37	538.45	2.53		2	3	DMSO	CON	50	42.65	61.71	2.44		3	3	DMSO	CON	50	158.53	427.5	9.88
1	3	DMSO	CON	54	248.39	517.1	2.59		2	3	DMSO	CON	54	42.92	61.05	2.2		3	3	DMSO	CON	54	161.68	425.19	9.81
1	3	DMSO	CON	58	282.74	525.95	2.27		2	3	DMSO	CON	58	44.32	60.12	2.45		3	3	DMSO	CON	58	168.11	430.07	9.85
1	3	DMSO	CON	62	302.78	543.82	2.16		2	3	DMSO	CON	62	45.01	60.4	2.23		3	3	DMSO	CON	62	179.16	423.19	9.96
1	3	DMSO	CON	66	278.58	550.22	2.67		2	3	DMSO	CON	66	46.97	60.86	2.35		3	3	DMSO	CON	66	179.4	422.06	9.15
1	3	DMSO	CON	70	324.16	544.6	2.24		2	3	DMSO	CON	70	46.05	63.27	2.37		3	3	DMSO	CON	70	184.79	418.35	9.34
1	3	DMSO	CON	74	331.63	537.12	2.51		2	3	DMSO	CON	74	48.65	61.13	2.45		3	3	DMSO	CON	74	191.56	421.13	9.02
1	3	DMSO	CON	78	326.37	495.36	2.38		2	3	DMSO	CON	78	48.21	62.69	2.31		3	3	DMSO	CON	78	196.44	417.5	8.75
1	3	DMSO	CON	82	348.55	511.13	2.36		2	3	DMSO	CON	82	50.11	64.18	2.48		3	3	DMSO	CON	82	196.36	415.69	8.76
1	3	DMSO	CON	86	334.67	499.3	2.63		2	3	DMSO	CON	86	49.19	65.16	2.45		3	3	DMSO	CON	86	196.62	411.53	9.24
1	3	DMSO	CON	90	361.08	515.55	2.09		2	3	DMSO	CON	90	50.78	63.3	2.47		3	3	DMSO	CON	90	205.05	414.5	9.41
1	3	DMSO	CON	94	369.2	497.82	2.29		2	3	DMSO	CON	94	51.51	64.91	2.32		3	3	DMSO	CON	94	207.81	417.29	9.16
1	3	DMSO	CON	98	365.95	465.52	2.22		2	3	DMSO	CON	98	53.58	62.77	2.73		3	3	DMSO	CON	98	210.18	410.57	8.73
1	4	DMSO	CON	0	194.5	92.69	2.65		2	4	DMSO	CON	0	39.03	27.08	2.35		3	4	DMSO	CON	0	316.69	249.51	2.58
1	4	DMSO	CON	4	191.3	100.38	2.35		2	4	DMSO	CON	4	37.15	24.54	2.43		3	4	DMSO	CON	4	316.13	247.29	2.38
1	4	DMSO	CON	8	202.57	97.76	2.39		2	4	DMSO	CON	8	40.91	24.96	2.44		3	4	DMSO	CON	8	317.05	247.27	2.63
1	4	DMSO	CON	10	7.98	91.05	2.6		2	4	DMSO	CON	10	3.49	24.42	2.34		3	4	DMSO	CON	10	26.49	239.4	2.68
1	4	DMSO	CON	14	18.68	93.66	2.26		2	4	DMSO	CON	14	5.63	23.46	2.34		3	4	DMSO	CON	14	46.37	239.95	2.54
1	4	DMSO	CON	18	27.67	88.39	2.56		2	4	DMSO	CON	18	6.19	23.69	2.27		3	4	DMSO	CON	18	56.32	242.46	2.55
1	4	DMSO	CON	22	32.32	93.59	2.41		2	4	DMSO	CON	22	7.5	25.92	2.16		3	4	DMSO	CON	22	62.63	239.99	2.48
1	4	DMSO	CON	26	39.28	89.23	2.36		2	4	DMSO	CON	26	9.45	26.29	2.76		3	4	DMSO	CON	26	69.3	240.74	2.45
1	4	DMSO	CON	30	41.38	91.01	2.75		2	4	DMSO	CON	30	10.05	27.32	2.39		3	4	DMSO	CON	30	74.25	239.39	2.56
1	4	DMSO	CON	34	48.18	93.63	2.48		2	4	DMSO	CON	34	10.88	26.2	2.68		3	4	DMSO	CON	34	79.47	237.9	2.44
1	4	DMSO	CON	38	48.66	101.76	2.51		2	4	DMSO	CON	38	11.19	25.36	2.3		3	4	DMSO	CON	38	84.14	235.26	2.23
1	4	DMSO	CON	42	48.39	100.66	2.26		2	4	DMSO	CON	42	13.6	26.55	2.95		3	4	DMSO	CON	42	88.73	233.34	2.23
1	4	DMSO	CON	46	52.48	97.24	2.73		2	4	DMSO	CON	46	13.43	25.2	2.57		3	4	DMSO	CON	46	91.36	238.43	2.7
1	4	DMSO	CON	50	62.43	91.06	2.16		2	4	DMSO	CON	50	14.29	25.04	2.89		3	4	DMSO	CON	50	94.1	234.53	2.2
1	4	DMSO	CON	54	61.83	100.19	2.3		2	4	DMSO	CON	54	14.87	22.6	2.79		3	4	DMSO	CON	54	99.22	233.19	2.56
1	4	DMSO	CON	58	68.04	105.71	2.48		2	4	DMSO	CON	58	15.35	25.02	2.47		3	4	DMSO	CON	58	101.02	233.8	2.38
1	4	DMSO	CON	62	68.68	113.43	2.3		2	4	DMSO	CON	62	14.05	24.14	2.27		3	4	DMSO	CON	62	104.41	230.67	3.01
1	4	DMSO	CON	66	70.89	114.52	2.45		2	4	DMSO	CON	66	13.86	22.09	2.42		3	4	DMSO	CON	66	108.93	230.21	2.58
1	4	DMSO	CON	70	88.64	94.09	2.35		2	4	DMSO	CON	70	17.47	23.95	2.37		3	4	DMSO	CON	70	109.85	228.49	2.55
1	4	DMSO	CON	74	86.61	98.6	2.39		2	4	DMSO	CON	74	17.27	23.61	2.53		3	4	DMSO	CON	74	112.45	230.12	2.74
1	4	DMSO	CON	78	86.13	93.93	2.3		2	4	DMSO	CON	78	19.91	25.04	2.47		3	4	DMSO	CON	78	113.33	229.45	2.36
1	4	DMSO	CON	82	91.31	95.52	2.39		2	4	DMSO	CON	82	17.31	23.89	2.59		3	4	DMSO	CON	82	116.22	226.8	2.4
1	4	DMSO	CON	86	91.95	93.2	2.25		2	4	DMSO	CON	86	18.06	23.42	2.11		3	4	DMSO	CON	86	119.68	227.75	2.65
1	4	DMSO	CON	90	96.7	104.17	2.34		2	4	DMSO	CON	90	19.79	24.72	2.36		3	4	DMSO	CON	90	119.46	226.15	2.49
1	4	DMSO	CON	94	92.43	93.89	2.46		2	4	DMSO	CON	94	18.62	23.04	2.21		3	4	DMSO	CON	94	122.8	225.66	2.54
1	4	DMSO	CON	98	95.22	98.4	2.69		2	4	DMSO	CON	98	18.78	24.72	2.09		3	4	DMSO	CON	98	125.1	225.33	2.18
1	5	DMSO	CON	0	395.62	159.91	2.29		2	5	DMSO	CON	0	131.55	93.18	2.34		3	5	DMSO	CON	0	201.58	169.24	2.28
1	5	DMSO	CON	4	387.88	173.24	2.77		2	5	DMSO	CON	4	134.03	99.74	2.53		3	5	DMSO	CON	4	200.06	169.29	2.75
1	5	DMSO	CON	8	388.24	166.34	2.73		2	5	DMSO	CON	8	142.25	95.9	2.67		3	5	DMSO	CON	8	201.39	166.55	2.19
1	5	DMSO	CON	10	19.52	156.07	2.75		2	5	DMSO	CON	10	6.1	95.86	2.49		3	5	DMSO	CON	10	7.32	158.99	2.46
1	5	DMSO	CON	14	47.91	159.32	2.39		2	5	DMSO	CON	14	14.4	98.54	2.25		3	5	DMSO	CON	14	16.01	162.21	2.2
1	5	DMSO	CON	18	68.51	149.11	2.76		2	5	DMSO	CON	18	19.64	95.41	2.4		3	5	DMSO	CON	18	22.26	154.41	2.1
1	5	DMSO	CON	22	86.67	146.36	2.65		2	5	DMSO	CON	22	24.54	92.74	2.33		3	5	DMSO	CON	22	28.54	157.87	2.33
1	5	DMSO	CON	26	103.2	148.38	2.78		2	5	DMSO	CON	26	27.43	90.81	2.4		3	5	DMSO	CON	26	33.74	159.6	2.65
1	5	DMSO	CON	30	116.31	157.95	2.8		2	5	DMSO	CON	30	30.87	90.93	2.21		3	5	DMSO	CON	30	37.41	158.46	2.04
1	5	DMSO	CON	34	130.22	160.36	2.91		2	5	DMSO	CON	34	35.65	92.39	2.2		3	5	DMSO	CON	34	43.14	161.61	2.53
1	5	DMSO	CON	38	138.49	154.93	2.5		2	5	DMSO	CON	38	40.55	91.27	2.35		3	5	DMSO	CON	38	47.01	163.23	2.54
1	5	DMSO	CON	42	151.42	139.36	2.75		2	5	DMSO	CON	42	43.57	95.89	2.5		3	5	DMSO	CON	42	50.73	162.75	2.35
1	5	DMSO	CON	46	161.47	136.54	2.4		2	5	DMSO	CON	46	48.17	91.39	2.13		3	5	DMSO	CON	46	53.72	165.93	2.35
1	5	DMSO	CON	50	169.14	149.88	2.48		2	5	DMSO	CON	50	49.94	94.31	2.42		3	5	DMSO	CON	50	57.46	159.89	2.27
1	5	DMSO	CON	54	176.48	151.31	2.52		2	5	DMSO	CON	54	51.55	90.63	2.32		3	5	DMSO	CON	54	62	160.93	2.41
1	5	DMSO	CON	58	183.32	168.24	2.9		2	5	DMSO	CON	58	54.49	91.93	2.28		3	5	DMSO	CON	58	63.45	158.97	2.21
1	5	DMSO	CON	62	188.86	169.3	3.04		2	5	DMSO	CON	62	58.63	91.42	2.22		3	5	DMSO	CON	62	65.93	155.84	2.24
1	5	DMSO	CON	66	195.58	163.82	2.72		2	5	DMSO	CON	66	61.04	91.14	2.4		3	5	DMSO	CON	66	69.41	157.47	2.42
1	5	DMSO	CON	70	202.42	162.04	2.62		2	5	DMSO	CON	70	63.05	91.57	2.29		3	5	DMSO	CON	70	70.81	157.48	2.39
1	5	DMSO	CON	74	207.63	162.73	2.71		2	5	DMSO	CON	74	64.05	91.03	2.46		3	5	DMSO	CON	74	73.09	156.66	2.27
1	5	DMSO	CON	78	214.23	168.08	2.7		2	5	DMSO	CON	78	64.6	93.6	2.36		3	5	DMSO	CON	78	73.72	155.19	2.53
1	5	DMSO	CON	82	220.04	162.18	2.52		2	5	DMSO	CON	82	67.83	91.94	2.33		3	5	DMSO	CON	82	76.12	155.74	2.39
1	5	DMSO	CON	86	224.2	163.71	2.91		2	5	DMSO	CON	86	69.04	91.89	2.37		3	5	DMSO	CON	86	75.69	160.27	2.66
1	5	DMSO	CON	90	226.26	163.8	2.79		2	5	DMSO	CON	90	66.04	93.19	2.29		3	5	DMSO	CON	90	79.83	157.1	2.57
1	5	DMSO	CON	94	231.9	164.83	2.36		2	5	DMSO	CON	94	72.33	88.8	2.47		3	5	DMSO	CON	94	78.53	158.17	2.15
1	5	DMSO	CON	98	237.32	166.64	3.29		2	5	DMSO	CON	98	74.16	92.23	2.29		3	5	DMSO	CON	98	79.27	156.14	2.51
1	6	DMSO	CON	0	297.12	71.22	2.92		2	6	DMSO	CON	0	165.69	78.42	2.46		3	6	DMSO	CON	0	160.37	190.51	2.26
1	6	DMSO	CON	4	285.88	73.98	2.96		2	6	DMSO	CON	4	165.54	79.06	2.5		3	6	DMSO	CON	4	161.6	197.14	2.42
1	6	DMSO	CON	8	280.22	76.41	3.33		2	6	DMSO	CON	8	164.49	77.08	2.22		3	6	DMSO	CON	8	159.82	193.58	2.25
1	6	DMSO	CON	10	10.28	72.49	3.15		2	6	DMSO	CON	10	8.24	80.1	2.59		3	6	DMSO	CON	10	6.72	192.29	2.14
1	6	DMSO	CON	14	28.38	75.36	3.06		2	6	DMSO	CON	14	14.62	78.87	2.24		3	6	DMSO	CON	14	15.23	190.82	2.6
1	6	DMSO	CON	18	43.29	73.87	3.44		2	6	DMSO	CON	18	20.94	79.92	2.13		3	6	DMSO	CON	18	20.26	190.51	2.09
1	6	DMSO	CON	22	52.59	75.66	3.16		2	6	DMSO	CON	22	24.47	78.26	2.56		3	6	DMSO	CON	22	25.31	184.34	2.45
1	6	DMSO	CON	26	63.95	72.27	3.3		2	6	DMSO	CON	26	26.37	78.93	2.08		3	6	DMSO	CON	26	30.58	183.23	2.41
1	6	DMSO	CON	30	71.03	75.41	3.57		2	6	DMSO	CON	30	30.31	76.82	2.18		3	6	DMSO	CON	30	33.95	180.14	2.34
1	6	DMSO	CON	34	78.65	75.08	3.45		2	6	DMSO	CON	34	34.73	76.51	2.39		3	6	DMSO	CON	34	37.27	174.7	2.11
1	6	DMSO	CON	38	84.3	70.26	3.29		2	6	DMSO	CON	38	38.19	75.52	2.21		3	6	DMSO	CON	38	40.43	171.31	2.17
1	6	DMSO	CON	42	93.15	72.96	3.32		2	6	DMSO	CON	42	41.28	74.01	2.47		3	6	DMSO	CON	42	43.57	174.65	2.1
1	6	DMSO	CON	46	104.42	72.09	3.57		2	6	DMSO	CON	46	43.19	76.31	2.57		3	6	DMSO	CON	46	46.05	169.41	2.32
1	6	DMSO	CON	50	105.41	71.26	3.18		2	6	DMSO	CON	50	47.99	75.48	2.57		3	6	DMSO	CON	50	48.67	167.33	2.21
1	6	DMSO	CON	54	100.14	70.31	3.05		2	6	DMSO	CON	54	49.58	76.29	2		3	6	DMSO	CON	54	52.45	167.08	2.43
1	6	DMSO	CON	58	119.03	70.41	3.02		2	6	DMSO	CON	58	53.09	75.71	2.25		3	6	DMSO	CON	58	54.65	164.79	2.83
1	6	DMSO	CON	62	116.82	72.21	3.65		2	6	DMSO	CON	62	53.96	73.08	2.28		3	6	DMSO	CON	62	57.04	172.59	2.64
1	6	DMSO	CON	66	127.2	72.62	3.27		2	6	DMSO	CON	66	56.8	72.95	2.37		3	6	DMSO	CON	66	59.46	170.51	2.78
1	6	DMSO	CON	70	131.68	70.88	3.28		2	6	DMSO	CON	70	59.31	72.81	2.29		3	6	DMSO	CON	70	62.18	173.53	2.48
1	6	DMSO	CON	74	135.06	69.77	3.44		2	6	DMSO	CON	74	61.8	73.84	2.79		3	6	DMSO	CON	74	63.67	176.75	2.24
1	6	DMSO	CON	78	143.32	69.27	3.52		2	6	DMSO	CON	78	63.7	69.22	2.49		3	6	DMSO	CON	78	66.1	170.66	2.61
1	6	DMSO	CON	82	144.87	70.37	3.59		2	6	DMSO	CON	82	63.6	70.9	1.92		3	6	DMSO	CON	82	66.19	156.24	2.24
1	6	DMSO	CON	86	159.36	67.54	3.25		2	6	DMSO	CON	86	67.29	71.72	2.65		3	6	DMSO	CON	86	70.28	145.19	2.52
1	6	DMSO	CON	90	150.42	66.13	3.22		2	6	DMSO	CON	90	68.58	70.9	2.26		3	6	DMSO	CON	90	69.73	135.11	2.27
1	6	DMSO	CON	94	151.94	65.12	3.25		2	6	DMSO	CON	94	66.43	70.33	2.02		3	6	DMSO	CON	94	71.73	141.51	2.34
1	6	DMSO	CON	98	149.42	64.32	3.54		2	6	DMSO	CON	98	70.62	68.89	2.24		3	6	DMSO	CON	98	74.06	152.41	2.33
1	7	DMSO	CON	0	244.79	76.61	2.03		2	7	DMSO	CON	0	103.77	71.59	2.35		3	7	DMSO	CON	0	225.78	140.84	9.78
1	7	DMSO	CON	4	256.99	75.15	2.47		2	7	DMSO	CON	4	100.36	67.89	2.25		3	7	DMSO	CON	4	232.4	136.83	9.57
1	7	DMSO	CON	8	256.16	78.59	2.56		2	7	DMSO	CON	8	102.54	69.4	2.29		3	7	DMSO	CON	8	219.5	139.55	10.1
1	7	DMSO	CON	10	6.16	82.24	2.21		2	7	DMSO	CON	10	4.75	69.16	2.49		3	7	DMSO	CON	10	8.07	137.01	10.06
1	7	DMSO	CON	14	17.17	88.66	2.21		2	7	DMSO	CON	14	8.68	66.57	2.05		3	7	DMSO	CON	14	21.82	129.9	10.48
1	7	DMSO	CON	18	25.55	77.44	2.01		2	7	DMSO	CON	18	12.19	66.72	2.18		3	7	DMSO	CON	18	29.44	137.08	9.56
1	7	DMSO	CON	22	32.77	69.44	2.08		2	7	DMSO	CON	22	15.7	66.25	2.44		3	7	DMSO	CON	22	37.69	143	10.19
1	7	DMSO	CON	26	40.62	69.86	2.32		2	7	DMSO	CON	26	18.98	69.71	2.34		3	7	DMSO	CON	26	46.97	145.56	9.94
1	7	DMSO	CON	30	47.99	73.65	2.27		2	7	DMSO	CON	30	22.26	64.94	2.6		3	7	DMSO	CON	30	53.67	140.53	10.19
1	7	DMSO	CON	34	54.86	70.98	2.33		2	7	DMSO	CON	34	22.68	67.04	2.33		3	7	DMSO	CON	34	60.84	136.54	10.25
1	7	DMSO	CON	38	59.03	74.49	2.42		2	7	DMSO	CON	38	25.32	63.05	2.09		3	7	DMSO	CON	38	64.95	129.21	9.82
1	7	DMSO	CON	42	65.26	65.89	2.34		2	7	DMSO	CON	42	27.37	66.95	2.14		3	7	DMSO	CON	42	67.41	137.46	9.93
1	7	DMSO	CON	46	67.77	66.52	2.46		2	7	DMSO	CON	46	29.81	65.43	2.54		3	7	DMSO	CON	46	71.14	127.1	9.43
1	7	DMSO	CON	50	74.22	64.89	2.44		2	7	DMSO	CON	50	32.86	62.52	2.19		3	7	DMSO	CON	50	70.3	128.94	9.75
1	7	DMSO	CON	54	79.21	72.65	2.61		2	7	DMSO	CON	54	33.22	63	2.3		3	7	DMSO	CON	54	83	124.44	9.79
1	7	DMSO	CON	58	82.5	71.15	2.46		2	7	DMSO	CON	58	35.52	65.18	2.2		3	7	DMSO	CON	58	89.2	134.39	10.01
1	7	DMSO	CON	62	85.9	67.6	2.39		2	7	DMSO	CON	62	37.24	67.95	2.24		3	7	DMSO	CON	62	91.73	143.53	9.95
1	7	DMSO	CON	66	89.91	68.32	2.33		2	7	DMSO	CON	66	37.78	62.11	2.15		3	7	DMSO	CON	66	92.26	141.3	9.63
1	7	DMSO	CON	70	93.36	71.02	2.56		2	7	DMSO	CON	70	42.12	63.93	2.41		3	7	DMSO	CON	70	94.23	142.29	10.06
1	7	DMSO	CON	74	97.59	66.21	1.95		2	7	DMSO	CON	74	42.64	62.37	2.53		3	7	DMSO	CON	74	93.1	133.82	9.75
1	7	DMSO	CON	78	100.48	65.81	2.54		2	7	DMSO	CON	78	43.41	64.44	2.1		3	7	DMSO	CON	78	101.96	134.73	10.51
1	7	DMSO	CON	82	100.33	68.78	2.12		2	7	DMSO	CON	82	43.36	66.48	2.37		3	7	DMSO	CON	82	106.17	123.65	9.31
1	7	DMSO	CON	86	106.09	68.4	2.43		2	7	DMSO	CON	86	45.19	62.83	2.35		3	7	DMSO	CON	86	109.28	135.99	9.91
1	7	DMSO	CON	90	108.72	68.98	2.11		2	7	DMSO	CON	90	43.89	64.63	2.57		3	7	DMSO	CON	90	113.35	129.18	9.74
1	7	DMSO	CON	94	112.83	62.5	2.4		2	7	DMSO	CON	94	45.21	67.05	2.25		3	7	DMSO	CON	94	116.66	127.98	9.6
1	7	DMSO	CON	98	110.53	65.95	2.32		2	7	DMSO	CON	98	48.53	66.07	2.2		3	7	DMSO	CON	98	118.46	133.52	9.66
1	8	DMSO	CON	0	300.04	351.25	5.98		2	8	DMSO	CON	0	42.74	30.7	3.61		3	8	DMSO	CON	0	210.19	209.9	17.88
1	8	DMSO	CON	4	306.77	342.67	6.79		2	8	DMSO	CON	4	43.97	29.17	3.73		3	8	DMSO	CON	4	208.1	208.3	17.63
1	8	DMSO	CON	8	300.75	335.74	6.48		2	8	DMSO	CON	8	43.75	27.77	3.97		3	8	DMSO	CON	8	206.28	218.68	18.16
1	8	DMSO	CON	10	14.35	326.5	6.34		2	8	DMSO	CON	10	5.21	26.2	4.12		3	8	DMSO	CON	10	13.95	211.14	18
1	8	DMSO	CON	14	35.17	347.6	6.61		2	8	DMSO	CON	14	7.79	27.73	3.71		3	8	DMSO	CON	14	25.05	210.66	17.8
1	8	DMSO	CON	18	50.17	353.44	6.49		2	8	DMSO	CON	18	8.9	26.02	2.92		3	8	DMSO	CON	18	31.44	217.79	18.26
1	8	DMSO	CON	22	63.49	370.53	7.23		2	8	DMSO	CON	22	11.3	26.99	3.6		3	8	DMSO	CON	22	36.37	210.9	18.5
1	8	DMSO	CON	26	74.62	359.23	6.95		2	8	DMSO	CON	26	12.28	29.09	3.72		3	8	DMSO	CON	26	40.55	220.35	17.73
1	8	DMSO	CON	30	84.02	364.44	6.73		2	8	DMSO	CON	30	13.41	27.42	3.67		3	8	DMSO	CON	30	45.15	218.19	17.45
1	8	DMSO	CON	34	93.23	372.32	6.34		2	8	DMSO	CON	34	14.03	28.53	3.58		3	8	DMSO	CON	34	47.51	221.63	17.63
1	8	DMSO	CON	38	101.11	365.97	6		2	8	DMSO	CON	38	15.19	27.36	3.77		3	8	DMSO	CON	38	52.6	214.29	17.73
1	8	DMSO	CON	42	100.74	363.3	7.08		2	8	DMSO	CON	42	15.96	29.37	3.82		3	8	DMSO	CON	42	54.98	225.3	17.27
1	8	DMSO	CON	46	109.92	372.79	6.47		2	8	DMSO	CON	46	15.64	28.09	3.49		3	8	DMSO	CON	46	55.63	220.44	16.92
1	8	DMSO	CON	50	115.78	362.92	6.25		2	8	DMSO	CON	50	16.81	28.6	3.83		3	8	DMSO	CON	50	58.14	218.18	17.33
1	8	DMSO	CON	54	119.9	364.71	6.73		2	8	DMSO	CON	54	16.94	27.02	3.19		3	8	DMSO	CON	54	59.87	220.04	16.5
1	8	DMSO	CON	58	133.29	370.32	5.67		2	8	DMSO	CON	58	17.96	28.22	3.29		3	8	DMSO	CON	58	62.7	221.56	17.24
1	8	DMSO	CON	62	128.13	371	6		2	8	DMSO	CON	62	18.32	27.72	3.64		3	8	DMSO	CON	62	63.81	218.76	17.13
1	8	DMSO	CON	66	143.04	369.99	6.21		2	8	DMSO	CON	66	19.26	27.58	3.52		3	8	DMSO	CON	66	61.99	218.09	16.54
1	8	DMSO	CON	70	153.87	377.63	5.37		2	8	DMSO	CON	70	20.65	25.18	3.31		3	8	DMSO	CON	70	70.1	217.07	17.27
1	8	DMSO	CON	74	153.06	376.49	6.23		2	8	DMSO	CON	74	21.01	27.21	3.88		3	8	DMSO	CON	74	68.88	213.56	16.79
1	8	DMSO	CON	78	159.83	378.15	5.86		2	8	DMSO	CON	78	20.59	27.05	3.68		3	8	DMSO	CON	78	64.6	217.77	16.91
1	8	DMSO	CON	82	160.86	378.17	6.06		2	8	DMSO	CON	82	21.05	25.65	3.66		3	8	DMSO	CON	82	69.23	216.04	16.85
1	8	DMSO	CON	86	166.79	375.11	6.48		2	8	DMSO	CON	86	22.12	27.99	3.45		3	8	DMSO	CON	86	72.09	216.79	16.28
1	8	DMSO	CON	90	166.61	373.07	5.82		2	8	DMSO	CON	90	22.11	26.41	3.57		3	8	DMSO	CON	90	71.55	213.32	17.34
1	8	DMSO	CON	94	164.62	370.65	6.49		2	8	DMSO	CON	94	22.75	26.22	3.76		3	8	DMSO	CON	94	75.07	208.54	17.4
1	8	DMSO	CON	98	155.37	362.17	5.74		2	8	DMSO	CON	98	22.76	25.76	3.37		3	8	DMSO	CON	98	73.56	206.63	16.74
1	9	DMSO	CON	0	420.12	233.47	2.25		2	9	DMSO	CON	0	113.73	83.37	2.49		3	9	DMSO	CON	0	488.65	1121.38	2.38
1	9	DMSO	CON	4	409.6	233.39	2.15		2	9	DMSO	CON	4	115.57	87.84	2.41		3	9	DMSO	CON	4	498.63	1152.65	2.38
1	9	DMSO	CON	8	421.14	230.39	2.2		2	9	DMSO	CON	8	114.93	81.71	2.24		3	9	DMSO	CON	8	487.6	1130.39	2.16
1	9	DMSO	CON	10	11.45	217.28	2.17		2	9	DMSO	CON	10	10.33	79.74	2.61		3	9	DMSO	CON	10	18.98	1111.31	2.14
1	9	DMSO	CON	14	33.16	224.71	2.43		2	9	DMSO	CON	14	20.15	83	2.42		3	9	DMSO	CON	14	48.3	1235.01	2.31
1	9	DMSO	CON	18	49.9	227.54	2.18		2	9	DMSO	CON	18	24.75	76.8	2.46		3	9	DMSO	CON	18	70.52	1232.2	2.42
1	9	DMSO	CON	22	64.6	229.56	2.41		2	9	DMSO	CON	22	29.61	78.39	2.29		3	9	DMSO	CON	22	86.2	1166.34	2.78
1	9	DMSO	CON	26	76.47	229.05	2.12		2	9	DMSO	CON	26	32.45	76.48	2.19		3	9	DMSO	CON	26	104.03	1228.67	2.45
1	9	DMSO	CON	30	90.91	224.69	2.35		2	9	DMSO	CON	30	35.71	79.73	2.53		3	9	DMSO	CON	30	116.92	1147.02	2.62
1	9	DMSO	CON	34	103.08	225.59	2.1		2	9	DMSO	CON	34	38.65	79.85	2.5		3	9	DMSO	CON	34	134.67	1212.23	2.35
1	9	DMSO	CON	38	114.91	220.61	2.47		2	9	DMSO	CON	38	40.56	82.38	2.15		3	9	DMSO	CON	38	141.57	1135.05	2.73
1	9	DMSO	CON	42	123.54	230.28	2.02		2	9	DMSO	CON	42	41.82	79.01	2.17		3	9	DMSO	CON	42	156.64	1220.83	2.65
1	9	DMSO	CON	46	132.21	221.67	2.47		2	9	DMSO	CON	46	45.52	77.25	2.27		3	9	DMSO	CON	46	168.21	1220.08	2.71
1	9	DMSO	CON	50	141.34	225.57	2.44		2	9	DMSO	CON	50	48.89	80.67	2.64		3	9	DMSO	CON	50	179.55	1256.96	2.77
1	9	DMSO	CON	54	148.81	223.97	2.64		2	9	DMSO	CON	54	49.79	79.36	2.22		3	9	DMSO	CON	54	184.17	1230.81	2.34
1	9	DMSO	CON	58	152.59	215.44	2.18		2	9	DMSO	CON	58	52.17	77.87	2.54		3	9	DMSO	CON	58	194.84	1246.48	2.36
1	9	DMSO	CON	62	159.95	221.08	2.36		2	9	DMSO	CON	62	54.06	78.93	2.46		3	9	DMSO	CON	62	201.52	1264.63	2.43
1	9	DMSO	CON	66	169.57	226.6	2.92		2	9	DMSO	CON	66	54.75	74.98	2.35		3	9	DMSO	CON	66	207.6	1278.64	2.45
1	9	DMSO	CON	70	173.15	235.45	2.45		2	9	DMSO	CON	70	57.94	78.33	2.35		3	9	DMSO	CON	70	215.15	1323.61	2.37
1	9	DMSO	CON	74	176.96	237.78	2.65		2	9	DMSO	CON	74	58.33	78.16	2.72		3	9	DMSO	CON	74	218.19	1333.26	2.4
1	9	DMSO	CON	78	186.74	231.09	2.45		2	9	DMSO	CON	78	59.72	76.12	2.24		3	9	DMSO	CON	78	219.58	1315.68	2.34
1	9	DMSO	CON	82	197.64	234.64	2		2	9	DMSO	CON	82	60.66	73.04	2.07		3	9	DMSO	CON	82	226.44	1324.11	2.81
1	9	DMSO	CON	86	191.96	224.61	2.26		2	9	DMSO	CON	86	60.24	76.21	2.66		3	9	DMSO	CON	86	230.27	1272.92	2.51
1	9	DMSO	CON	90	197.59	229.87	2.52		2	9	DMSO	CON	90	60.43	76.01	2.39		3	9	DMSO	CON	90	233.83	1323.51	2.32
1	9	DMSO	CON	94	204.35	221.18	2.34		2	9	DMSO	CON	94	60.84	74.8	2.41		3	9	DMSO	CON	94	235.79	1271.63	2.03
1	9	DMSO	CON	98	211.69	217.61	2.07		2	9	DMSO	CON	98	61.75	75.27	2.5		3	9	DMSO	CON	98	239.9	1276.76	2.2
1	10	DMSO	CON	0	120.15	65.87	2.41		2	10	DMSO	CON	0	135.29	82.71	2.48		3	10	DMSO	CON	0	261.29	2382.11	2.67
1	10	DMSO	CON	4	115.67	65.18	2.38		2	10	DMSO	CON	4	132.82	81.68	2.26		3	10	DMSO	CON	4	260.57	2397.8	2.1
1	10	DMSO	CON	8	104.05	66.1	2.08		2	10	DMSO	CON	8	139.41	80.81	2.1		3	10	DMSO	CON	8	264.58	2387.15	2.33
1	10	DMSO	CON	10	5.8	60.53	2.17		2	10	DMSO	CON	10	4.67	80.69	2.3		3	10	DMSO	CON	10	25.73	2347.95	2.39
1	10	DMSO	CON	14	14.25	64.12	2.52		2	10	DMSO	CON	14	11.45	80.49	2.32		3	10	DMSO	CON	14	47.41	2384.78	2.25
1	10	DMSO	CON	18	18.06	66.07	2.19		2	10	DMSO	CON	18	16.11	79.67	2.32		3	10	DMSO	CON	18	61.33	2342.77	2.47
1	10	DMSO	CON	22	22.01	63.53	2.5		2	10	DMSO	CON	22	19.42	78.17	2.45		3	10	DMSO	CON	22	68.83	2320.16	2.17
1	10	DMSO	CON	26	25.21	62.87	2.33		2	10	DMSO	CON	26	23.1	79.6	2.49		3	10	DMSO	CON	26	78.47	2289.21	2.56
1	10	DMSO	CON	30	29.35	62.78	2.32		2	10	DMSO	CON	30	26.17	78.49	2.17		3	10	DMSO	CON	30	83.51	2308.49	2.36
1	10	DMSO	CON	34	31.35	62.07	2.47		2	10	DMSO	CON	34	29.93	79.46	2.18		3	10	DMSO	CON	34	90.3	2280.41	2.47
1	10	DMSO	CON	38	34.98	62.06	2.36		2	10	DMSO	CON	38	33.94	77.76	2.16		3	10	DMSO	CON	38	95.82	2285.57	2.16
1	10	DMSO	CON	42	37.89	60.34	2.12		2	10	DMSO	CON	42	36.32	76.45	2.55		3	10	DMSO	CON	42	101.06	2296.04	2.38
1	10	DMSO	CON	46	39.63	59.68	2.34		2	10	DMSO	CON	46	38.63	76.69	2.09		3	10	DMSO	CON	46	107.45	2260.07	2.35
1	10	DMSO	CON	50	41.21	57.84	2.3		2	10	DMSO	CON	50	40.5	76.95	2.53		3	10	DMSO	CON	50	110.97	2344.7	2.31
1	10	DMSO	CON	54	43.8	59.57	2.29		2	10	DMSO	CON	54	42.88	76.92	2.09		3	10	DMSO	CON	54	116.81	2290.2	2.08
1	10	DMSO	CON	58	45.41	58.56	2.43		2	10	DMSO	CON	58	47.08	75.31	2.29		3	10	DMSO	CON	58	122.08	2320.8	2.33
1	10	DMSO	CON	62	48.74	57.46	2.31		2	10	DMSO	CON	62	48	76.63	2.34		3	10	DMSO	CON	62	122.3	2289.84	2.23
1	10	DMSO	CON	66	50.94	58.58	2.53		2	10	DMSO	CON	66	49.1	77.2	2.14		3	10	DMSO	CON	66	123.72	2304.25	2.18
1	10	DMSO	CON	70	51.1	58.49	2.43		2	10	DMSO	CON	70	51.17	75.16	2.65		3	10	DMSO	CON	70	127.46	2279.11	2.14
1	10	DMSO	CON	74	53.11	57.65	2.81		2	10	DMSO	CON	74	50.88	76.28	2.01		3	10	DMSO	CON	74	132.37	2224.51	2.42
1	10	DMSO	CON	78	54.56	56.85	2.41		2	10	DMSO	CON	78	51.56	76.34	2.41		3	10	DMSO	CON	78	135.74	2269.44	2.28
1	10	DMSO	CON	82	55.25	57.12	2.56		2	10	DMSO	CON	82	52.48	73.26	2.16		3	10	DMSO	CON	82	138.02	2284.18	2.55
1	10	DMSO	CON	86	55.98	55.13	2.19		2	10	DMSO	CON	86	54.5	74.24	2.41		3	10	DMSO	CON	86	140.51	2245.46	2.42
1	10	DMSO	CON	90	58.01	54.97	2.52		2	10	DMSO	CON	90	52.7	73.24	2.38		3	10	DMSO	CON	90	141.24	2257.24	2.21
1	10	DMSO	CON	94	57.89	55.63	2.54		2	10	DMSO	CON	94	57.57	73.85	2.35		3	10	DMSO	CON	94	142.83	2208.47	2.37
1	10	DMSO	CON	98	59.91	59.1	2.33		2	10	DMSO	CON	98	57.52	73.79	2.38		3	10	DMSO	CON	98	146.23	2134.62	2.28
1	1	500 nM	CON	0	105.93	93.75	2.19		2	11	DMSO	CON	0	110.25	105.06	3.56		3	11	DMSO	CON	0	511.31	661.89	2.6
1	1	500 nM	CON	4	111.97	106.96	2.63		2	11	DMSO	CON	4	108.09	110.16	3.31		3	11	DMSO	CON	4	511.66	650.83	2.66
1	1	500 nM	CON	8	111.19	112.88	2.17		2	11	DMSO	CON	8	107.05	114.6	3.24		3	11	DMSO	CON	8	523.17	642.51	2.59
1	1	500 nM	CON	10	2.9	107	2.24		2	11	DMSO	CON	10	5.98	107.31	3.43		3	11	DMSO	CON	10	26.32	645.92	2.1
1	1	500 nM	CON	14	4.51	98.26	2.59		2	11	DMSO	CON	14	11.95	111.89	3.35		3	11	DMSO	CON	14	68.48	645.35	2.46
1	1	500 nM	CON	18	5.57	106.15	2.37		2	11	DMSO	CON	18	15.53	111.25	2.94		3	11	DMSO	CON	18	95.55	641.26	2.24
1	1	500 nM	CON	22	6.1	111.94	2.26		2	11	DMSO	CON	22	20.23	106.33	3.51		3	11	DMSO	CON	22	118.29	641.56	2.29
1	1	500 nM	CON	26	7.06	95.09	2.49		2	11	DMSO	CON	26	23.38	108.56	3.36		3	11	DMSO	CON	26	136.69	636.66	2.58
1	1	500 nM	CON	30	7.58	109.91	2.65		2	11	DMSO	CON	30	26.08	100.38	3.32		3	11	DMSO	CON	30	156.78	624.77	2.81
1	1	500 nM	CON	34	7.24	103.89	2.06		2	11	DMSO	CON	34	28.83	107.05	3.48		3	11	DMSO	CON	34	170.64	621.55	2.12
1	1	500 nM	CON	38	7.99	95.32	1.91		2	11	DMSO	CON	38	30.98	104.78	3.2		3	11	DMSO	CON	38	186.83	621.74	2.4
1	1	500 nM	CON	42	8.51	89.9	2.41		2	11	DMSO	CON	42	34.73	100.41	3.49		3	11	DMSO	CON	42	198.83	617.57	2.27
1	1	500 nM	CON	46	9.09	66.1	2.41		2	11	DMSO	CON	46	36.57	101.34	3.57		3	11	DMSO	CON	46	211.05	610.19	2.53
1	1	500 nM	CON	50	8.97	85.17	2.08		2	11	DMSO	CON	50	37.4	110.74	3.55		3	11	DMSO	CON	50	219.62	609.75	2.68
1	1	500 nM	CON	54	9.12	88.93	2.09		2	11	DMSO	CON	54	39.6	107.44	3.54		3	11	DMSO	CON	54	221.51	616.16	2.66
1	1	500 nM	CON	58	9.79	85.97	2.31		2	11	DMSO	CON	58	40.76	103.35	2.7		3	11	DMSO	CON	58	232.92	601.43	2.22
1	1	500 nM	CON	62	10.1	87.47	2.23		2	11	DMSO	CON	62	40.85	110.58	3.41		3	11	DMSO	CON	62	239.95	604.19	2.35
1	1	500 nM	CON	66	10.28	89.55	1.96		2	11	DMSO	CON	66	43.47	111.08	3.01		3	11	DMSO	CON	66	248.81	595.89	2.33
1	1	500 nM	CON	70	9.99	89.25	2.02		2	11	DMSO	CON	70	44.56	108.68	3.35		3	11	DMSO	CON	70	256.97	591.49	2.39
1	1	500 nM	CON	74	10.1	89.85	2.26		2	11	DMSO	CON	74	44.92	110.88	2.81		3	11	DMSO	CON	74	259.6	594.72	2.46
1	1	500 nM	CON	78	10.36	96.56	2.64		2	11	DMSO	CON	78	46.9	103.43	3.32		3	11	DMSO	CON	78	265.85	584.55	2.05
1	1	500 nM	CON	82	10.99	92.03	2.06		2	11	DMSO	CON	82	49.39	103.75	3.24		3	11	DMSO	CON	82	268.01	590.2	2.32
1	1	500 nM	CON	86	10.83	82.74	2.53		2	11	DMSO	CON	86	49.78	101.52	2.84		3	11	DMSO	CON	86	274.99	589.76	2.32
1	1	500 nM	CON	90	11.2	88.2	2.47		2	11	DMSO	CON	90	51.73	100.65	2.54		3	11	DMSO	CON	90	272.71	591.6	2.59
1	1	500 nM	CON	94	11.59	97.25	2.56		2	11	DMSO	CON	94	50.24	106.84	2.69		3	11	DMSO	CON	94	282.48	577.3	2.27
1	1	500 nM	CON	98	11.88	109.61	2.38		2	11	DMSO	CON	98	50.36	105.37	3.29		3	11	DMSO	CON	98	280.2	584.33	2.63
1	2	500 nM	CON	0	276.96	386.13	2.78		2	12	DMSO	CON	0	201.36	87.04	2.14		3	12	DMSO	CON	0	241.24	152.2	21.52
1	2	500 nM	CON	4	268.85	382.73	2.15		2	12	DMSO	CON	4	199.71	81.41	2.3		3	12	DMSO	CON	4	240.91	155.48	21.77
1	2	500 nM	CON	8	272.8	386.2	2.06		2	12	DMSO	CON	8	201.89	76.9	2.38		3	12	DMSO	CON	8	239.2	155.25	22.26
1	2	500 nM	CON	10	4.19	370.17	2.4		2	12	DMSO	CON	10	7.66	80.5	2.22		3	12	DMSO	CON	10	10.24	139.62	20.14
1	2	500 nM	CON	14	6.48	383.27	2.29		2	12	DMSO	CON	14	17.6	80.76	2.18		3	12	DMSO	CON	14	19.76	144.65	22.13
1	2	500 nM	CON	18	7.84	392.11	2.1		2	12	DMSO	CON	18	23.81	73.44	2.06		3	12	DMSO	CON	18	25.01	148.52	22.51
1	2	500 nM	CON	22	10.25	389.7	2.31		2	12	DMSO	CON	22	29.49	72.58	2.02		3	12	DMSO	CON	22	29.78	151.51	22.02
1	2	500 nM	CON	26	10.92	380.25	2.09		2	12	DMSO	CON	26	36.96	75.11	2.23		3	12	DMSO	CON	26	31.52	152.39	21.94
1	2	500 nM	CON	30	12.44	384.36	2.67		2	12	DMSO	CON	30	41.65	69.76	2.28		3	12	DMSO	CON	30	37.84	150.21	21.93
1	2	500 nM	CON	34	13.19	370.1	2.36		2	12	DMSO	CON	34	44.92	77.05	2.04		3	12	DMSO	CON	34	42.06	149.7	22.24
1	2	500 nM	CON	38	14.83	380.26	2.14		2	12	DMSO	CON	38	50.32	66.18	2.18		3	12	DMSO	CON	38	45.82	142.58	21.57
1	2	500 nM	CON	42	15.25	376.08	2		2	12	DMSO	CON	42	53.35	77.82	2.14		3	12	DMSO	CON	42	49.34	144.77	21.99
1	2	500 nM	CON	46	16.31	383.26	2.28		2	12	DMSO	CON	46	55.82	66.66	2.32		3	12	DMSO	CON	46	52.99	142.48	21.4
1	2	500 nM	CON	50	16.53	379.24	2.17		2	12	DMSO	CON	50	60.45	70.89	2.42		3	12	DMSO	CON	50	56.12	142.46	22.94
1	2	500 nM	CON	54	17.34	375.56	2.28		2	12	DMSO	CON	54	63.87	73.6	2.35		3	12	DMSO	CON	54	58.78	143.45	22.42
1	2	500 nM	CON	58	18.09	383.53	1.81		2	12	DMSO	CON	58	65.2	66.88	2.08		3	12	DMSO	CON	58	62.04	146.66	22.25
1	2	500 nM	CON	62	20.3	392.38	2.57		2	12	DMSO	CON	62	71.76	72.25	2.63		3	12	DMSO	CON	62	63.51	146.34	22.67
1	2	500 nM	CON	66	19.91	370.88	2.21		2	12	DMSO	CON	66	71.97	74.89	2.28		3	12	DMSO	CON	66	66.45	143.26	22.8
1	2	500 nM	CON	70	18.96	375.72	2.56		2	12	DMSO	CON	70	74.81	73.59	2.43		3	12	DMSO	CON	70	66.28	142.1	21.43
1	2	500 nM	CON	74	21	362.45	2.47		2	12	DMSO	CON	74	78.45	77.21	2.31		3	12	DMSO	CON	74	69.37	141.12	21.59
1	2	500 nM	CON	78	22.32	367.13	2.54		2	12	DMSO	CON	78	82.17	78.72	2.23		3	12	DMSO	CON	78	65.81	144.66	22.15
1	2	500 nM	CON	82	23.06	358.98	2.22		2	12	DMSO	CON	82	83.71	73.45	2.39		3	12	DMSO	CON	82	72.74	144.25	22.93
1	2	500 nM	CON	86	24.06	351.84	2.28		2	12	DMSO	CON	86	87.4	74.94	2.22		3	12	DMSO	CON	86	76.29	144.65	22.81
1	2	500 nM	CON	90	23.14	333.44	2.06		2	12	DMSO	CON	90	91.86	75.26	2.65		3	12	DMSO	CON	90	77.43	147.19	23.21
1	2	500 nM	CON	94	23.73	344.62	2.41		2	12	DMSO	CON	94	92.23	72.84	2.49		3	12	DMSO	CON	94	79.55	142.98	22.17
1	2	500 nM	CON	98	25.16	350.79	2.16		2	12	DMSO	CON	98	92.63	70.85	2.15		3	12	DMSO	CON	98	80.75	146.06	22.64
1	3	500 nM	CON	0	236.47	487.86	1.76		2	1	500 nM	CON	0	556.77	352.94	2.4		3	1	500nM	TRIM37	0	634.83	1471.26	2.71
1	3	500 nM	CON	4	239.33	492.58	1.84		2	1	500 nM	CON	4	525.17	348.76	2.53		3	1	500nM	TRIM37	4	629.85	1466.93	2.77
1	3	500 nM	CON	8	239.55	497.85	2.33		2	1	500 nM	CON	8	520.66	352.31	2.18		3	1	500nM	TRIM37	8	632.77	1451.3	2.48
1	3	500 nM	CON	10	4.29	474.52	2.21		2	1	500 nM	CON	10	6.31	348.94	2.41		3	1	500nM	TRIM37	10	11.43	1433.97	2.51
1	3	500 nM	CON	14	8.06	494.42	2.67		2	1	500 nM	CON	14	9.48	345.17	2.11		3	1	500nM	TRIM37	14	21.72	1445.44	2.64
1	3	500 nM	CON	18	10.53	504.22	2.61		2	1	500 nM	CON	18	10.5	344.7	2.15		3	1	500nM	TRIM37	18	25.1	1390.89	2.47
1	3	500 nM	CON	22	11.47	504.23	2.23		2	1	500 nM	CON	22	11.73	332.23	2.4		3	1	500nM	TRIM37	22	27.38	1364.48	2
1	3	500 nM	CON	26	12.16	500.34	1.84		2	1	500 nM	CON	26	11.86	336.03	2.24		3	1	500nM	TRIM37	26	29.98	1410.54	2.32
1	3	500 nM	CON	30	15.07	504.65	1.75		2	1	500 nM	CON	30	12.36	338.93	2.57		3	1	500nM	TRIM37	30	32.92	1416.37	2.8
1	3	500 nM	CON	34	15.69	499.43	2.2		2	1	500 nM	CON	34	12.59	329.38	2.13		3	1	500nM	TRIM37	34	34.67	1393.46	2.45
1	3	500 nM	CON	38	16.74	514.71	2.12		2	1	500 nM	CON	38	12.35	335.78	2.43		3	1	500nM	TRIM37	38	35.87	1387.32	2.57
1	3	500 nM	CON	42	18.84	528.87	2.36		2	1	500 nM	CON	42	11.63	330.25	2.09		3	1	500nM	TRIM37	42	38.21	1392.91	2.36
1	3	500 nM	CON	46	19.6	515.08	2.11		2	1	500 nM	CON	46	13.52	329.89	2.44		3	1	500nM	TRIM37	46	39.94	1423.54	2.36
1	3	500 nM	CON	50	20.77	522.93	2.32		2	1	500 nM	CON	50	12.73	334.26	2.27		3	1	500nM	TRIM37	50	41.83	1440.93	2.37
1	3	500 nM	CON	54	20.04	475.26	2.37		2	1	500 nM	CON	54	12.76	331.58	2.29		3	1	500nM	TRIM37	54	43.13	1370.02	2.29
1	3	500 nM	CON	58	20.81	487.16	2.27		2	1	500 nM	CON	58	13.76	328.25	2.37		3	1	500nM	TRIM37	58	45.18	1426.47	2.38
1	3	500 nM	CON	62	21.02	488.92	2.39		2	1	500 nM	CON	62	13.4	324.46	2.24		3	1	500nM	TRIM37	62	46.5	1377.91	2.71
1	3	500 nM	CON	66	20.42	497.52	1.97		2	1	500 nM	CON	66	13.46	323.01	2.49		3	1	500nM	TRIM37	66	47.78	1424.68	2.26
1	3	500 nM	CON	70	21.72	512.91	2.6		2	1	500 nM	CON	70	13.58	321.65	2.25		3	1	500nM	TRIM37	70	48.12	1470.67	2.48
1	3	500 nM	CON	74	18.43	499.38	2.3		2	1	500 nM	CON	74	13.14	324.78	2.41		3	1	500nM	TRIM37	74	49.06	1441.29	2.37
1	3	500 nM	CON	78	16.92	494.43	2.12		2	1	500 nM	CON	78	13.65	321.53	2.54		3	1	500nM	TRIM37	78	49.55	1386.88	2.32
1	3	500 nM	CON	82	17.29	482.15	2.56		2	1	500 nM	CON	82	14.09	323.55	2.51		3	1	500nM	TRIM37	82	52.26	1376.56	2.49
1	3	500 nM	CON	86	16.71	498	3.05		2	1	500 nM	CON	86	13.9	322.04	2.64		3	1	500nM	TRIM37	86	51.7	1342.11	2.34
1	3	500 nM	CON	90	11.83	510.55	2.3		2	1	500 nM	CON	90	13.85	315.1	2.19		3	1	500nM	TRIM37	90	55.07	1387.09	2.68
1	3	500 nM	CON	94	10.04	502.5	2.22		2	1	500 nM	CON	94	14.78	318.25	2.62		3	1	500nM	TRIM37	94	54.89	1355.34	2.38
1	3	500 nM	CON	98	10.51	503.99	1.87		2	1	500 nM	CON	98	14.49	319.23	2.15		3	1	500nM	TRIM37	98	55.62	1359.27	2.43
1	4	500 nM	CON	0	119.78	55.48	2.28		2	2	500 nM	CON	0	103.28	57	2.21		3	2	500nM	TRIM37	0	2078.89	1639.13	2.69
1	4	500 nM	CON	4	123.6	57.18	2.65		2	2	500 nM	CON	4	106.97	51.32	2.34		3	2	500nM	TRIM37	4	2081.86	1635.32	2.29
1	4	500 nM	CON	8	124.42	56.37	2.25		2	2	500 nM	CON	8	101.39	56.28	2.35		3	2	500nM	TRIM37	8	2096.08	1665.91	2.37
1	4	500 nM	CON	10	3.02	53.87	2.19		2	2	500 nM	CON	10	4.34	54.15	2.21		3	2	500nM	TRIM37	10	35.17	1662.34	2.55
1	4	500 nM	CON	14	4.5	55.45	2.23		2	2	500 nM	CON	14	7.36	54.01	2.47		3	2	500nM	TRIM37	14	49.09	1669.64	2.84
1	4	500 nM	CON	18	5.72	55.97	2.18		2	2	500 nM	CON	18	8.89	51.99	2.47		3	2	500nM	TRIM37	18	52.18	1599.05	2.53
1	4	500 nM	CON	22	6.29	55.28	2.44		2	2	500 nM	CON	22	9.21	56.42	2.32		3	2	500nM	TRIM37	22	55.32	1610.34	2.47
1	4	500 nM	CON	26	6.6	51.48	2.19		2	2	500 nM	CON	26	10.05	52.39	2.68		3	2	500nM	TRIM37	26	59.58	1648.93	2.28
1	4	500 nM	CON	30	7.89	48.58	2.64		2	2	500 nM	CON	30	11.56	55.09	2.68		3	2	500nM	TRIM37	30	62.95	1650.22	2.65
1	4	500 nM	CON	34	7.61	48.81	2.19		2	2	500 nM	CON	34	11.57	49.77	2.32		3	2	500nM	TRIM37	34	64.06	1667.8	2.33
1	4	500 nM	CON	38	8.28	53.63	2.29		2	2	500 nM	CON	38	12.47	52.43	2.42		3	2	500nM	TRIM37	38	64.89	1610.22	2.5
1	4	500 nM	CON	42	8.5	53.97	2		2	2	500 nM	CON	42	12.46	51.24	1.99		3	2	500nM	TRIM37	42	66.94	1578.81	2.5
1	4	500 nM	CON	46	9.28	55.79	2.2		2	2	500 nM	CON	46	13.67	50.15	2.08		3	2	500nM	TRIM37	46	70.44	1606.99	2.65
1	4	500 nM	CON	50	9.96	56.18	2.46		2	2	500 nM	CON	50	14.2	46.71	2.41		3	2	500nM	TRIM37	50	69.9	1613.1	2.18
1	4	500 nM	CON	54	9.44	55.77	2.31		2	2	500 nM	CON	54	14.63	44.4	2.38		3	2	500nM	TRIM37	54	72.67	1618.04	2.79
1	4	500 nM	CON	58	9.92	56.83	2.6		2	2	500 nM	CON	58	15.77	47.61	2.54		3	2	500nM	TRIM37	58	73.05	1582.99	2.8
1	4	500 nM	CON	62	10.6	56.8	2.39		2	2	500 nM	CON	62	15.3	48.71	2.36		3	2	500nM	TRIM37	62	73.66	1622.08	2.61
1	4	500 nM	CON	66	10.49	55.9	2.65		2	2	500 nM	CON	66	15.25	45.94	2.17		3	2	500nM	TRIM37	66	74.97	1618.87	2.72
1	4	500 nM	CON	70	10.79	56.2	2.44		2	2	500 nM	CON	70	15.82	50.2	2.46		3	2	500nM	TRIM37	70	75.97	1570.27	2.59
1	4	500 nM	CON	74	11.27	56.89	2.7		2	2	500 nM	CON	74	15.94	47.68	2.62		3	2	500nM	TRIM37	74	76.57	1573.47	2.29
1	4	500 nM	CON	78	10.6	56.15	2		2	2	500 nM	CON	78	17.08	49.08	2.85		3	2	500nM	TRIM37	78	77.92	1576.96	2.7
1	4	500 nM	CON	82	11.1	55.22	2.32		2	2	500 nM	CON	82	16.35	46.6	2.06		3	2	500nM	TRIM37	82	79.88	1590.35	2.57
1	4	500 nM	CON	86	11.85	56.01	2.46		2	2	500 nM	CON	86	16.86	42.66	2.37		3	2	500nM	TRIM37	86	81.28	1575.04	2.79
1	4	500 nM	CON	90	12.01	56.54	2.48		2	2	500 nM	CON	90	16.78	46.03	2.36		3	2	500nM	TRIM37	90	82.43	1574.36	2.81
1	4	500 nM	CON	94	11.7	55.49	2.07		2	2	500 nM	CON	94	17.09	46.09	2.33		3	2	500nM	TRIM37	94	82.64	1601.04	2.26
1	4	500 nM	CON	98	12	56.34	2.45		2	2	500 nM	CON	98	17.36	48.3	2.52		3	2	500nM	TRIM37	98	83.23	1526.46	2.56
1	5	500 nM	CON	0	138.35	41.34	4.9		2	3	500 nM	CON	0	445.69	232.94	5.76		3	3	500nM	TRIM37	0	2965.45	2196.51	54.49
1	5	500 nM	CON	4	141.12	41.74	4.7		2	3	500 nM	CON	4	445.47	230.64	5.4		3	3	500nM	TRIM37	4	2964.66	2175.7	55.33
1	5	500 nM	CON	8	135.74	40.83	4.91		2	3	500 nM	CON	8	438.91	222.02	5.22		3	3	500nM	TRIM37	8	2938.71	2194.74	54.53
1	5	500 nM	CON	10	4.26	37.7	5.48		2	3	500 nM	CON	10	5.56	223.59	4.73		3	3	500nM	TRIM37	10	119.45	2179.25	53.26
1	5	500 nM	CON	14	5.1	41.42	5.15		2	3	500 nM	CON	14	9.77	232.68	5.18		3	3	500nM	TRIM37	14	168.43	2146.32	54.49
1	5	500 nM	CON	18	5.44	41.99	5.37		2	3	500 nM	CON	18	12.36	228.68	5.5		3	3	500nM	TRIM37	18	187.37	2141.28	54.54
1	5	500 nM	CON	22	5.94	43.26	5.26		2	3	500 nM	CON	22	13.95	223.88	5.11		3	3	500nM	TRIM37	22	194.44	2175.62	54.67
1	5	500 nM	CON	26	5.59	42.01	5.24		2	3	500 nM	CON	26	14.5	211.5	4.66		3	3	500nM	TRIM37	26	201.25	2177.96	55.08
1	5	500 nM	CON	30	5.01	39.53	4.3		2	3	500 nM	CON	30	17.02	211.06	4.83		3	3	500nM	TRIM37	30	207.36	2148.66	54
1	5	500 nM	CON	34	5.72	38.93	4.97		2	3	500 nM	CON	34	18.62	216.32	5.15		3	3	500nM	TRIM37	34	212.4	2141.09	53.96
1	5	500 nM	CON	38	5.3	37.29	5.13		2	3	500 nM	CON	38	19.55	218.68	5.16		3	3	500nM	TRIM37	38	221.92	2108.89	54.32
1	5	500 nM	CON	42	5.38	37.96	4.97		2	3	500 nM	CON	42	19.94	224.2	5.04		3	3	500nM	TRIM37	42	224	2163	54.19
1	5	500 nM	CON	46	5.27	39.89	4.79		2	3	500 nM	CON	46	21.19	217.07	4.77		3	3	500nM	TRIM37	46	219.18	2165.62	53.32
1	5	500 nM	CON	50	5.65	38.7	5.04		2	3	500 nM	CON	50	22.25	220.87	5		3	3	500nM	TRIM37	50	218.01	2188.84	53.58
1	5	500 nM	CON	54	5.34	40.9	4.77		2	3	500 nM	CON	54	23.56	207.49	4.94		3	3	500nM	TRIM37	54	224	2140.02	54.36
1	5	500 nM	CON	58	4.99	41.9	4.86		2	3	500 nM	CON	58	24.96	210.71	5.25		3	3	500nM	TRIM37	58	225.87	2160.1	54.4
1	5	500 nM	CON	62	5.4	38.9	4.99		2	3	500 nM	CON	62	25.82	210.42	4.72		3	3	500nM	TRIM37	62	222.79	2197.42	54.59
1	5	500 nM	CON	66	5.76	35	4.9		2	3	500 nM	CON	66	26.9	196.79	4.77		3	3	500nM	TRIM37	66	226.56	2160.07	53.85
1	5	500 nM	CON	70	5.92	34.78	5.47		2	3	500 nM	CON	70	26.94	189.95	4.7		3	3	500nM	TRIM37	70	219.96	2195.75	53.56
1	5	500 nM	CON	74	5.01	34.56	4.33		2	3	500 nM	CON	74	27.77	202.01	4.67		3	3	500nM	TRIM37	74	222.2	2180.23	54.22
1	5	500 nM	CON	78	5.77	38.3	5.01		2	3	500 nM	CON	78	28.04	190.89	4.71		3	3	500nM	TRIM37	78	220.28	2172.47	55.28
1	5	500 nM	CON	82	4.79	40.5	4.68		2	3	500 nM	CON	82	28.6	189.12	4.91		3	3	500nM	TRIM37	82	221.97	2147.45	55.08
1	5	500 nM	CON	86	5.38	39.38	4.88		2	3	500 nM	CON	86	29.65	180.79	4.77		3	3	500nM	TRIM37	86	224.54	2100.51	54.88
1	5	500 nM	CON	90	5.34	38.43	4.61		2	3	500 nM	CON	90	31.96	168.65	4.9		3	3	500nM	TRIM37	90	225.55	2118.54	54.64
1	5	500 nM	CON	94	4.74	36.95	4.7		2	3	500 nM	CON	94	32.81	174.12	5.22		3	3	500nM	TRIM37	94	224.93	2129.18	54.08
1	5	500 nM	CON	98	5.18	34.69	5		2	3	500 nM	CON	98	34.33	170.59	4.89		3	3	500nM	TRIM37	98	224.15	2137.99	54.86
1	6	500 nM	CON	0	1250.08	120.22	10.35		2	4	500 nM	CON	0	297.99	741.65	2.18		3	4	500nM	TRIM37	0	1498.97	1540.6	8.33
1	6	500 nM	CON	4	1249.86	117.37	11.12		2	4	500 nM	CON	4	292.17	739.47	2.39		3	4	500nM	TRIM37	4	1514.62	1538.06	8.99
1	6	500 nM	CON	8	1247.91	114.58	10.33		2	4	500 nM	CON	8	281.58	724.77	2.21		3	4	500nM	TRIM37	8	1449.53	1532.25	8.52
1	6	500 nM	CON	10	7.89	114.16	9.64		2	4	500 nM	CON	10	4.79	751.64	2.44		3	4	500nM	TRIM37	10	42.51	1515.79	8.37
1	6	500 nM	CON	14	16.57	118.22	10.11		2	4	500 nM	CON	14	6.71	743.97	2.22		3	4	500nM	TRIM37	14	58.3	1516.12	8.21
1	6	500 nM	CON	18	22.54	117.62	10.35		2	4	500 nM	CON	18	8.5	757.76	2.19		3	4	500nM	TRIM37	18	63.71	1517.77	8
1	6	500 nM	CON	22	26.55	118.67	11.03		2	4	500 nM	CON	22	9.4	725.8	2.26		3	4	500nM	TRIM37	22	65.32	1511.38	7.87
1	6	500 nM	CON	26	29.58	115.88	9.79		2	4	500 nM	CON	26	10.59	740.81	2.31		3	4	500nM	TRIM37	26	66.02	1500.72	7.43
1	6	500 nM	CON	30	30.33	116.6	9.03		2	4	500 nM	CON	30	10.7	724.98	2.12		3	4	500nM	TRIM37	30	76.43	1495.59	8.08
1	6	500 nM	CON	34	34.87	115.03	10.26		2	4	500 nM	CON	34	11.38	722.8	2.19		3	4	500nM	TRIM37	34	81.04	1481.98	8.03
1	6	500 nM	CON	38	35.94	116.61	10.79		2	4	500 nM	CON	38	12.62	740.89	2.4		3	4	500nM	TRIM37	38	88.16	1468.12	7.45
1	6	500 nM	CON	42	37.88	115.3	10.43		2	4	500 nM	CON	42	12.55	738.7	2.29		3	4	500nM	TRIM37	42	90.45	1462.65	7.58
1	6	500 nM	CON	46	40.38	113.83	10.69		2	4	500 nM	CON	46	14.39	757.11	2.51		3	4	500nM	TRIM37	46	94.8	1446.99	7.67
1	6	500 nM	CON	50	41.63	113.26	9.98		2	4	500 nM	CON	50	14.89	752.49	2.38		3	4	500nM	TRIM37	50	92.38	1445.74	7.1
1	6	500 nM	CON	54	41.93	116.53	9.32		2	4	500 nM	CON	54	14.88	720.15	2.47		3	4	500nM	TRIM37	54	96.92	1437.31	7.57
1	6	500 nM	CON	58	44.61	117.79	10.18		2	4	500 nM	CON	58	15.31	730.65	2.48		3	4	500nM	TRIM37	58	100.58	1430.81	7.82
1	6	500 nM	CON	62	46.03	116.4	10.18		2	4	500 nM	CON	62	16.49	742.1	2.53		3	4	500nM	TRIM37	62	100.47	1418.52	7.59
1	6	500 nM	CON	66	47.53	114.76	10.39		2	4	500 nM	CON	66	15.91	723.29	2.26		3	4	500nM	TRIM37	66	105.06	1414.76	7.63
1	6	500 nM	CON	70	50.27	115.6	10.38		2	4	500 nM	CON	70	16.02	726.51	2.17		3	4	500nM	TRIM37	70	101.14	1410.48	7.38
1	6	500 nM	CON	74	51.19	116.94	10.73		2	4	500 nM	CON	74	17.2	733.51	2.4		3	4	500nM	TRIM37	74	104.43	1396.69	7.58
1	6	500 nM	CON	78	51.43	119.31	9.57		2	4	500 nM	CON	78	15.96	696.93	1.95		3	4	500nM	TRIM37	78	101.25	1379.08	7.03
1	6	500 nM	CON	82	52.98	118.89	9.75		2	4	500 nM	CON	82	15.7	697.15	1.8		3	4	500nM	TRIM37	82	111.18	1377.15	7.24
1	6	500 nM	CON	86	54.62	121.15	10		2	4	500 nM	CON	86	16.94	683.52	2.13		3	4	500nM	TRIM37	86	112.89	1368.24	7.13
1	6	500 nM	CON	90	56.01	117.65	10.72		2	4	500 nM	CON	90	17.38	680.25	2		3	4	500nM	TRIM37	90	118.11	1361.73	7.04
1	6	500 nM	CON	94	58.08	119.04	10.73		2	4	500 nM	CON	94	19.17	709.83	2.67		3	4	500nM	TRIM37	94	118.03	1341	7.29
1	6	500 nM	CON	98	59.19	119.83	10.35		2	4	500 nM	CON	98	18.54	675.27	2.41		3	4	500nM	TRIM37	98	124.39	1341.51	6.89
1	7	500 nM	CON	0	132.49	278.3	2.29		2	5	500 nM	CON	0	135.9	83.73	2.2		3	5	500nM	TRIM37	0	1586.81	1728.84	5.13
1	7	500 nM	CON	4	136.77	279.72	2.27		2	5	500 nM	CON	4	139.92	89.25	2.3		3	5	500nM	TRIM37	4	1574.66	1729.81	5.02
1	7	500 nM	CON	8	136.94	281.11	2.44		2	5	500 nM	CON	8	141.54	87.94	2.52		3	5	500nM	TRIM37	8	1554.87	1709.1	5.18
1	7	500 nM	CON	10	4.19	274.55	2.47		2	5	500 nM	CON	10	5.34	88.23	2.34		3	5	500nM	TRIM37	10	50.21	1690.71	4.98
1	7	500 nM	CON	14	7.31	278.33	2.12		2	5	500 nM	CON	14	9	89.1	2.54		3	5	500nM	TRIM37	14	63.97	1692.41	5.41
1	7	500 nM	CON	18	7.93	278.63	2.09		2	5	500 nM	CON	18	10.69	85.99	2.18		3	5	500nM	TRIM37	18	72.79	1698.03	5.21
1	7	500 nM	CON	22	9.59	280.33	2.36		2	5	500 nM	CON	22	12.37	87.55	2.21		3	5	500nM	TRIM37	22	76.23	1617.49	5.98
1	7	500 nM	CON	26	10.18	277.99	2.14		2	5	500 nM	CON	26	13.78	86.35	2.53		3	5	500nM	TRIM37	26	80.24	1608.41	5.42
1	7	500 nM	CON	30	10.59	279.47	2.25		2	5	500 nM	CON	30	14.34	83.85	2.11		3	5	500nM	TRIM37	30	85.93	1612.48	5.37
1	7	500 nM	CON	34	12.06	278.03	2.36		2	5	500 nM	CON	34	15.03	87.24	2.26		3	5	500nM	TRIM37	34	88.55	1574.48	5.46
1	7	500 nM	CON	38	11.87	277.31	1.99		2	5	500 nM	CON	38	15.88	82.62	2.24		3	5	500nM	TRIM37	38	88.88	1559.98	6.54
1	7	500 nM	CON	42	13.37	276.48	2.62		2	5	500 nM	CON	42	16.53	82	2.04		3	5	500nM	TRIM37	42	90.95	1627.39	5.19
1	7	500 nM	CON	46	13.59	280.62	2.37		2	5	500 nM	CON	46	17.77	85.3	2.25		3	5	500nM	TRIM37	46	93.05	1601.41	5.45
1	7	500 nM	CON	50	14.09	279.35	2.28		2	5	500 nM	CON	50	18.84	85.8	2.42		3	5	500nM	TRIM37	50	96.67	1639.48	5.62
1	7	500 nM	CON	54	15.07	279.24	2.72		2	5	500 nM	CON	54	19.65	86.39	2.32		3	5	500nM	TRIM37	54	96.83	1618.02	5.62
1	7	500 nM	CON	58	15.06	280.94	2.24		2	5	500 nM	CON	58	19.86	84.62	2.27		3	5	500nM	TRIM37	58	97.91	1618.08	6.02
1	7	500 nM	CON	62	14.39	277.3	2.22		2	5	500 nM	CON	62	20.31	79.18	2.22		3	5	500nM	TRIM37	62	100.33	1622.34	5.92
1	7	500 nM	CON	66	15.62	279.11	2.07		2	5	500 nM	CON	66	21.66	84.44	2.15		3	5	500nM	TRIM37	66	107.08	1587.9	5.31
1	7	500 nM	CON	70	15.55	276.27	2.3		2	5	500 nM	CON	70	21.47	80.33	2.03		3	5	500nM	TRIM37	70	110.03	1553.01	5.85
1	7	500 nM	CON	74	15.24	282.32	2.28		2	5	500 nM	CON	74	22.48	80.3	2.36		3	5	500nM	TRIM37	74	109.16	1580.63	5.73
1	7	500 nM	CON	78	16.15	279.3	2.15		2	5	500 nM	CON	78	23.18	80.5	2.43		3	5	500nM	TRIM37	78	109.39	1600.69	5.35
1	7	500 nM	CON	82	19.41	277.11	1.98		2	5	500 nM	CON	82	24.06	82.01	2.67		3	5	500nM	TRIM37	82	108.37	1506.2	6.85
1	7	500 nM	CON	86	18.17	278.42	2.31		2	5	500 nM	CON	86	24.41	80.31	2.5		3	5	500nM	TRIM37	86	110.51	1568.52	5.81
1	7	500 nM	CON	90	19.3	278.61	2.41		2	5	500 nM	CON	90	24.36	81.28	2.32		3	5	500nM	TRIM37	90	111.52	1560.2	5.58
1	7	500 nM	CON	94	20.14	277.58	2.5		2	5	500 nM	CON	94	24.86	81.11	2.32		3	5	500nM	TRIM37	94	115.46	1525.05	5.92
1	7	500 nM	CON	98	18.37	275.91	2.31		2	5	500 nM	CON	98	25.69	79.72	2.55		3	5	500nM	TRIM37	98	109.59	1462.49	6.09
1	8	500 nM	CON	0	176.57	17.53	2.14		2	6	500 nM	CON	0	191.89	269.28	2.33		3	6	500nM	TRIM37	0	1219.22	237.99	2.37
1	8	500 nM	CON	4	174.73	16.7	1.96		2	6	500 nM	CON	4	194.11	262.33	2.55		3	6	500nM	TRIM37	4	1192.45	253.89	2.43
1	8	500 nM	CON	8	178.7	18.43	2.23		2	6	500 nM	CON	8	187.2	272.75	2.35		3	6	500nM	TRIM37	8	1181.77	236.67	2.34
1	8	500 nM	CON	10	4.21	17.19	2.38		2	6	500 nM	CON	10	6.84	262.87	2.4		3	6	500nM	TRIM37	10	14.06	235.14	2.36
1	8	500 nM	CON	14	6.58	18.48	2.42		2	6	500 nM	CON	14	12.51	263.51	2.16		3	6	500nM	TRIM37	14	27.43	241.15	2.38
1	8	500 nM	CON	18	7.35	16.6	1.99		2	6	500 nM	CON	18	14.8	251.48	2.24		3	6	500nM	TRIM37	18	33.9	250.1	2.29
1	8	500 nM	CON	22	9.59	18.39	2.36		2	6	500 nM	CON	22	16.73	264.61	2.26		3	6	500nM	TRIM37	22	39.72	240.26	2.43
1	8	500 nM	CON	26	10.44	18.25	2.28		2	6	500 nM	CON	26	18	268.27	2.52		3	6	500nM	TRIM37	26	43.45	239.14	2.34
1	8	500 nM	CON	30	10.55	19.21	2.32		2	6	500 nM	CON	30	18.06	272.92	2.06		3	6	500nM	TRIM37	30	45.87	221.87	2.19
1	8	500 nM	CON	34	10.51	18.67	2.05		2	6	500 nM	CON	34	19.6	269.32	2.17		3	6	500nM	TRIM37	34	49.72	232.73	2.17
1	8	500 nM	CON	38	11.87	17.87	2.18		2	6	500 nM	CON	38	19.68	259.35	2.34		3	6	500nM	TRIM37	38	53.52	228.64	2.21
1	8	500 nM	CON	42	12.16	18.85	2.28		2	6	500 nM	CON	42	21.04	260.14	2.1		3	6	500nM	TRIM37	42	56.02	227.01	2.5
1	8	500 nM	CON	46	13.14	19.43	2.2		2	6	500 nM	CON	46	22.12	297.45	2.63		3	6	500nM	TRIM37	46	58.19	220.4	2.23
1	8	500 nM	CON	50	14.23	19.28	2.43		2	6	500 nM	CON	50	22.58	277.93	2.64		3	6	500nM	TRIM37	50	60.41	220.93	1.89
1	8	500 nM	CON	54	13.53	20.14	2.26		2	6	500 nM	CON	54	21.43	263.84	2.19		3	6	500nM	TRIM37	54	64.24	230.46	2.41
1	8	500 nM	CON	58	14.83	21.77	2.84		2	6	500 nM	CON	58	22.69	280.64	2.14		3	6	500nM	TRIM37	58	65.97	228.93	2.23
1	8	500 nM	CON	62	14.64	20.23	2.39		2	6	500 nM	CON	62	23.11	276.13	2.18		3	6	500nM	TRIM37	62	68.26	234.82	1.9
1	8	500 nM	CON	66	15.12	19.13	2.29		2	6	500 nM	CON	66	23.2	272.77	2.19		3	6	500nM	TRIM37	66	69.77	221.24	2.41
1	8	500 nM	CON	70	16.41	20.79	2.37		2	6	500 nM	CON	70	23.51	264.84	2.18		3	6	500nM	TRIM37	70	72.69	226.02	2.18
1	8	500 nM	CON	74	15.08	20.52	2.24		2	6	500 nM	CON	74	25.42	259.33	2.49		3	6	500nM	TRIM37	74	74.91	240.12	2.52
1	8	500 nM	CON	78	16.21	21.15	2.14		2	6	500 nM	CON	78	24.92	254.85	2.44		3	6	500nM	TRIM37	78	76.71	219.29	2.62
1	8	500 nM	CON	82	15.9	19.94	2.05		2	6	500 nM	CON	82	26.21	273.88	2.13		3	6	500nM	TRIM37	82	79.45	238.68	2.07
1	8	500 nM	CON	86	16.97	21.88	2.48		2	6	500 nM	CON	86	26.99	273.34	2.65		3	6	500nM	TRIM37	86	82.68	234.05	2.31
1	8	500 nM	CON	90	21.21	21.37	2.14		2	6	500 nM	CON	90	26.72	259.19	2.29		3	6	500nM	TRIM37	90	82.35	224.26	2.29
1	8	500 nM	CON	94	22.3	21.48	2.24		2	6	500 nM	CON	94	24.76	251.36	2.17		3	6	500nM	TRIM37	94	84.05	217.96	2.12
1	8	500 nM	CON	98	19.4	22.08	2.28		2	6	500 nM	CON	98	26.03	253.96	2.3		3	6	500nM	TRIM37	98	85	227.59	2.32
1	9	500 nM	CON	0	781.18	137.94	2.57		2	7	500 nM	CON	0	798.48	2101.67	2.12		3	7	500nM	TRIM37	0	2207.99	472.47	2.11
1	9	500 nM	CON	4	787.13	135.65	2.43		2	7	500 nM	CON	4	797.02	2096.45	2.26		3	7	500nM	TRIM37	4	2203.82	476.27	2.26
1	9	500 nM	CON	8	785.76	141.44	2.54		2	7	500 nM	CON	8	780.34	2069.36	2.19		3	7	500nM	TRIM37	8	2184.98	468.61	2.41
1	9	500 nM	CON	10	6.64	158.29	2.69		2	7	500 nM	CON	10	45.85	1995.32	2.12		3	7	500nM	TRIM37	10	28.29	445.98	1.87
1	9	500 nM	CON	14	13.16	158.19	2.59		2	7	500 nM	CON	14	57.38	2025.53	2.59		3	7	500nM	TRIM37	14	53.37	448.62	2.45
1	9	500 nM	CON	18	16.25	154.27	2.5		2	7	500 nM	CON	18	62.34	2030.95	2.45		3	7	500nM	TRIM37	18	64.93	459.17	2.18
1	9	500 nM	CON	22	18.9	128.94	2.4		2	7	500 nM	CON	22	64.84	2029.33	2.49		3	7	500nM	TRIM37	22	73.54	462.7	2.27
1	9	500 nM	CON	26	20.96	179.88	2.48		2	7	500 nM	CON	26	67.57	2017.8	2.59		3	7	500nM	TRIM37	26	79.67	452.67	2.48
1	9	500 nM	CON	30	22.66	169.53	2.27		2	7	500 nM	CON	30	70.4	2009.82	2.26		3	7	500nM	TRIM37	30	82.43	465.19	2.51
1	9	500 nM	CON	34	24.22	189	2.34		2	7	500 nM	CON	34	72.44	2028.5	2.64		3	7	500nM	TRIM37	34	87.31	446.43	2.39
1	9	500 nM	CON	38	25.53	172.32	2.01		2	7	500 nM	CON	38	74.09	2020.07	2.26		3	7	500nM	TRIM37	38	89.77	447.08	2.01
1	9	500 nM	CON	42	27.87	168.77	2.79		2	7	500 nM	CON	42	73.83	1983.2	2.5		3	7	500nM	TRIM37	42	93.91	444.37	2.45
1	9	500 nM	CON	46	28.46	180.97	1.84		2	7	500 nM	CON	46	80.37	1971.11	2.29		3	7	500nM	TRIM37	46	97.47	438.66	2.17
1	9	500 nM	CON	50	30.82	175.2	2.69		2	7	500 nM	CON	50	83.88	1952.6	2.75		3	7	500nM	TRIM37	50	101.19	448.53	2.47
1	9	500 nM	CON	54	32.18	166.96	2.6		2	7	500 nM	CON	54	87.36	1960.09	2.51		3	7	500nM	TRIM37	54	105.91	449.02	2.7
1	9	500 nM	CON	58	32.01	163.77	1.78		2	7	500 nM	CON	58	84.87	1975.39	2.41		3	7	500nM	TRIM37	58	108.55	455.67	2.33
1	9	500 nM	CON	62	33.8	166.91	1.94		2	7	500 nM	CON	62	88.92	1950.92	2.2		3	7	500nM	TRIM37	62	111.12	453.86	2.26
1	9	500 nM	CON	66	35.85	126.11	2		2	7	500 nM	CON	66	89.4	1929.79	2.42		3	7	500nM	TRIM37	66	114.1	438.93	2.12
1	9	500 nM	CON	70	37.27	134.03	2.51		2	7	500 nM	CON	70	90.53	1894.18	2.11		3	7	500nM	TRIM37	70	115.38	430.57	2.29
1	9	500 nM	CON	74	36.87	169.32	1.95		2	7	500 nM	CON	74	93.54	1887.14	2.43		3	7	500nM	TRIM37	74	115.79	447.84	2.54
1	9	500 nM	CON	78	37.23	204.28	2.13		2	7	500 nM	CON	78	96.5	1869.79	2.57		3	7	500nM	TRIM37	78	120.23	431.9	2.36
1	9	500 nM	CON	82	37.25	183.28	1.9		2	7	500 nM	CON	82	97.7	1891.27	2.37		3	7	500nM	TRIM37	82	122.12	426.71	2.32
1	9	500 nM	CON	86	40.86	167.36	2.92		2	7	500 nM	CON	86	98.65	1890.22	2.25		3	7	500nM	TRIM37	86	123.52	421.18	2.53
1	9	500 nM	CON	90	39.88	145.42	2.44		2	7	500 nM	CON	90	100.79	1884.91	2.47		3	7	500nM	TRIM37	90	124.09	417.04	2.09
1	9	500 nM	CON	94	41.41	166.86	2.05		2	7	500 nM	CON	94	101.38	1871.3	2.39		3	7	500nM	TRIM37	94	125.33	405.74	2.56
1	9	500 nM	CON	98	40.84	126.17	2.01		2	7	500 nM	CON	98	104.14	1856.77	2.14		3	7	500nM	TRIM37	98	125.4	409.8	2.28
1	10	500 nM	CON	0	482.86	1378.29	2.34		2	8	500 nM	CON	0	59.13	43.48	2.56		3	8	500nM	TRIM37	0	402.83	151.8	2.9
1	10	500 nM	CON	4	455.37	1356.81	2.29		2	8	500 nM	CON	4	58.65	45.13	2.29		3	8	500nM	TRIM37	4	424.21	146.61	3.18
1	10	500 nM	CON	8	484.97	1462.59	2.43		2	8	500 nM	CON	8	57.12	42.11	2.8		3	8	500nM	TRIM37	8	411.88	146.82	2.83
1	10	500 nM	CON	10	7.74	1413.16	2.49		2	8	500 nM	CON	10	9.3	39.3	3.13		3	8	500nM	TRIM37	10	10.91	148.33	3.32
1	10	500 nM	CON	14	16.26	1550.33	2.44		2	8	500 nM	CON	14	14.56	41.58	2.31		3	8	500nM	TRIM37	14	17.94	148.01	2.95
1	10	500 nM	CON	18	21.14	1633.12	2.28		2	8	500 nM	CON	18	16.77	42.97	2.66		3	8	500nM	TRIM37	18	20.23	151.31	2.4
1	10	500 nM	CON	22	24.71	1607.73	2.1		2	8	500 nM	CON	22	18.69	41.86	2.68		3	8	500nM	TRIM37	22	24.49	143.85	3.35
1	10	500 nM	CON	26	27.99	1667.51	2.33		2	8	500 nM	CON	26	18.73	42.08	2.59		3	8	500nM	TRIM37	26	25.58	145.13	3.17
1	10	500 nM	CON	30	29.32	1637	2.23		2	8	500 nM	CON	30	19.15	38.84	2.39		3	8	500nM	TRIM37	30	27.16	143.22	2.68
1	10	500 nM	CON	34	30.75	1496.33	2.29		2	8	500 nM	CON	34	19.93	41.03	2.48		3	8	500nM	TRIM37	34	29.77	140.7	2.79
1	10	500 nM	CON	38	32.52	1395.76	2.26		2	8	500 nM	CON	38	20.8	40.03	2.72		3	8	500nM	TRIM37	38	31.37	142.9	3.17
1	10	500 nM	CON	42	33.47	1418.56	2.26		2	8	500 nM	CON	42	20.64	40	2.48		3	8	500nM	TRIM37	42	31.01	146.88	3.09
1	10	500 nM	CON	46	34.77	1417.68	2.18		2	8	500 nM	CON	46	20.78	36.85	2.56		3	8	500nM	TRIM37	46	32.5	141.34	2.74
1	10	500 nM	CON	50	34.9	1413.35	2.02		2	8	500 nM	CON	50	20.11	34.49	2.47		3	8	500nM	TRIM37	50	33.42	138.72	2.8
1	10	500 nM	CON	54	39.32	1364.96	2.42		2	8	500 nM	CON	54	20.49	34.2	2.4		3	8	500nM	TRIM37	54	32.96	140.48	2.3
1	10	500 nM	CON	58	40.03	1315.96	2.26		2	8	500 nM	CON	58	21.78	35.78	2.6		3	8	500nM	TRIM37	58	40.85	144	2.44
1	10	500 nM	CON	62	37.44	1337.59	2.17		2	8	500 nM	CON	62	21.89	35.59	2.54		3	8	500nM	TRIM37	62	37.22	138.45	3.02
1	10	500 nM	CON	66	37.87	1310.5	2.51		2	8	500 nM	CON	66	21.18	34.44	2.4		3	8	500nM	TRIM37	66	40.66	138.68	3.52
1	10	500 nM	CON	70	38.06	1341.57	2.66		2	8	500 nM	CON	70	21.72	37.29	2.44		3	8	500nM	TRIM37	70	38.33	140.82	2.77
1	10	500 nM	CON	74	40.91	1343	2.2		2	8	500 nM	CON	74	21.26	36.33	2.05		3	8	500nM	TRIM37	74	41.59	137.6	2.8
1	10	500 nM	CON	78	40.7	1440.66	2.38		2	8	500 nM	CON	78	22.47	37.33	2.38		3	8	500nM	TRIM37	78	41.14	142.87	3.19
1	10	500 nM	CON	82	40.21	1365.79	2.49		2	8	500 nM	CON	82	21.65	35.11	2.5		3	8	500nM	TRIM37	82	41.52	138.03	2.79
1	10	500 nM	CON	86	41.79	1347.43	2.25		2	8	500 nM	CON	86	22.3	35.02	2.81		3	8	500nM	TRIM37	86	42.3	136.48	2.93
1	10	500 nM	CON	90	46.03	1359.78	2.31		2	8	500 nM	CON	90	22.03	33.76	2.57		3	8	500nM	TRIM37	90	44.53	138.21	3.01
1	10	500 nM	CON	94	46.82	1414.46	2.21		2	8	500 nM	CON	94	22.55	35.69	2.47		3	8	500nM	TRIM37	94	46.11	128.42	2.61
1	10	500 nM	CON	98	46.92	1505.95	2.15		2	8	500 nM	CON	98	21.82	34.08	2.36		3	8	500nM	TRIM37	98	43.66	132.16	2.95
1	11	500 nM	CON	0	217.33	297.59	1.97		2	9	500 nM	CON	0	530.45	382.55	2.26		3	9	500nM	TRIM37	0	829.97	427.45	2.44
1	11	500 nM	CON	4	225.15	301.81	2.15		2	9	500 nM	CON	4	525.75	379.28	2.03		3	9	500nM	TRIM37	4	831.42	442.38	2.31
1	11	500 nM	CON	8	228.06	307.68	2.43		2	9	500 nM	CON	8	529.56	375	2.21		3	9	500nM	TRIM37	8	829.52	442.93	2.27
1	11	500 nM	CON	10	7.91	274.71	2.24		2	9	500 nM	CON	10	26.72	371.96	2.2		3	9	500nM	TRIM37	10	17.5	406.63	2.49
1	11	500 nM	CON	14	13.98	296.96	2.1		2	9	500 nM	CON	14	29.55	372.34	2.37		3	9	500nM	TRIM37	14	31.79	415.92	2.45
1	11	500 nM	CON	18	16.37	300.16	2.32		2	9	500 nM	CON	18	31.39	376.09	2.14		3	9	500nM	TRIM37	18	35.35	402.33	2.32
1	11	500 nM	CON	22	16.92	297.56	2.21		2	9	500 nM	CON	22	35.08	370.58	2.28		3	9	500nM	TRIM37	22	38.2	414.07	2.37
1	11	500 nM	CON	26	17.31	294.45	2.12		2	9	500 nM	CON	26	45.21	361.08	2.09		3	9	500nM	TRIM37	26	41.67	412.9	2.42
1	11	500 nM	CON	30	17.96	289.76	2.08		2	9	500 nM	CON	30	48.25	362.72	2.29		3	9	500nM	TRIM37	30	43.96	412.7	2.72
1	11	500 nM	CON	34	20.49	295.03	1.95		2	9	500 nM	CON	34	50.68	357.23	2.3		3	9	500nM	TRIM37	34	43.81	411.64	2.3
1	11	500 nM	CON	38	21.71	300.97	3.01		2	9	500 nM	CON	38	42.08	355.77	2.06		3	9	500nM	TRIM37	38	43.21	406.34	2.2
1	11	500 nM	CON	42	21.57	299.05	2.28		2	9	500 nM	CON	42	44.73	361.03	2.46		3	9	500nM	TRIM37	42	45.8	406.11	2.59
1	11	500 nM	CON	46	22.28	300.57	2.54		2	9	500 nM	CON	46	47.28	353.47	2.18		3	9	500nM	TRIM37	46	47.23	406.45	2.07
1	11	500 nM	CON	50	22.94	297.95	2.51		2	9	500 nM	CON	50	51.23	358.56	2.23		3	9	500nM	TRIM37	50	49.92	414.72	2.11
1	11	500 nM	CON	54	22.74	298.53	2.25		2	9	500 nM	CON	54	48.9	356.87	2.64		3	9	500nM	TRIM37	54	50.95	408.94	2.31
1	11	500 nM	CON	58	23.26	305.38	2.15		2	9	500 nM	CON	58	51.13	349.45	2.22		3	9	500nM	TRIM37	58	51.49	402.95	2.17
1	11	500 nM	CON	62	23.96	301.98	2.33		2	9	500 nM	CON	62	56.7	349.19	2.48		3	9	500nM	TRIM37	62	52.51	406.94	2.18
1	11	500 nM	CON	66	24.75	296.24	2.07		2	9	500 nM	CON	66	48.82	349.29	2.15		3	9	500nM	TRIM37	66	53.18	406.57	2.38
1	11	500 nM	CON	70	25.76	298.96	2.58		2	9	500 nM	CON	70	54.61	340.82	2.24		3	9	500nM	TRIM37	70	54.96	402.15	2.77
1	11	500 nM	CON	74	25.59	301.04	1.99		2	9	500 nM	CON	74	59.03	342.32	2.36		3	9	500nM	TRIM37	74	55.77	394.08	2.43
1	11	500 nM	CON	78	25.69	305.17	2.33		2	9	500 nM	CON	78	61.92	334.38	2.02		3	9	500nM	TRIM37	78	57.16	396.42	2.46
1	11	500 nM	CON	82	25.58	299.1	1.88		2	9	500 nM	CON	82	62.63	350.02	2.42		3	9	500nM	TRIM37	82	57.24	392.1	2.34
1	11	500 nM	CON	86	27.08	293.27	2.35		2	9	500 nM	CON	86	62.41	341.98	2.28		3	9	500nM	TRIM37	86	58.19	391.3	2.32
1	11	500 nM	CON	90	26.22	299.49	2.24		2	9	500 nM	CON	90	66.64	331.01	2.42		3	9	500nM	TRIM37	90	59.63	391.51	2.88
1	11	500 nM	CON	94	27.39	293.06	2.34		2	9	500 nM	CON	94	55.44	324.1	1.83		3	9	500nM	TRIM37	94	59.45	388.38	2.62
1	11	500 nM	CON	98	27.52	306.44	2.18		2	9	500 nM	CON	98	53.93	339.73	2.2		3	9	500nM	TRIM37	98	59.31	382.16	2.36
1	12	500 nM	CON	0	988.64	1424.34	2.06		2	10	500 nM	CON	0	33.26	31.47	2.41		3	10	500nM	TRIM37	0	458.09	233.17	2.49
1	12	500 nM	CON	4	975.65	1396.76	2.26		2	10	500 nM	CON	4	35.09	31.04	3.02		3	10	500nM	TRIM37	4	455.27	227.71	2.27
1	12	500 nM	CON	8	968.67	1446.39	2.38		2	10	500 nM	CON	8	32.59	34.35	2.8		3	10	500nM	TRIM37	8	451.65	235.56	2.67
1	12	500 nM	CON	10	11.59	1346.91	1.88		2	10	500 nM	CON	10	4.11	32.1	2.55		3	10	500nM	TRIM37	10	5.86	226.6	2.42
1	12	500 nM	CON	14	18.98	1420.82	2.21		2	10	500 nM	CON	14	5.64	28.84	2.66		3	10	500nM	TRIM37	14	10.48	230.79	2.48
1	12	500 nM	CON	18	22.01	1495.47	2.21		2	10	500 nM	CON	18	6.13	33.2	2.27		3	10	500nM	TRIM37	18	13.19	224.73	2.64
1	12	500 nM	CON	22	22.86	1509.77	2.58		2	10	500 nM	CON	22	6.73	29.62	2.48		3	10	500nM	TRIM37	22	14.53	226.33	2.49
1	12	500 nM	CON	26	22.05	1466.5	2.49		2	10	500 nM	CON	26	6.94	29.04	2.26		3	10	500nM	TRIM37	26	16.22	226.25	2.35
1	12	500 nM	CON	30	23.88	1457.51	1.95		2	10	500 nM	CON	30	7.41	29.27	2.24		3	10	500nM	TRIM37	30	17.94	224.05	2.34
1	12	500 nM	CON	34	23.35	1486.22	2.61		2	10	500 nM	CON	34	7.3	30.12	2.22		3	10	500nM	TRIM37	34	18.82	223.72	2.15
1	12	500 nM	CON	38	26.96	1500.31	2.84		2	10	500 nM	CON	38	7.8	30.48	2.64		3	10	500nM	TRIM37	38	20.06	220.54	2.05
1	12	500 nM	CON	42	26.52	1490.89	2.31		2	10	500 nM	CON	42	7.62	30.54	2.34		3	10	500nM	TRIM37	42	21.77	223.4	2.56
1	12	500 nM	CON	46	26.56	1482.64	1.99		2	10	500 nM	CON	46	8.24	28.67	2.5		3	10	500nM	TRIM37	46	21.99	221.99	1.92
1	12	500 nM	CON	50	27.39	1478.31	2.3		2	10	500 nM	CON	50	8.12	31.45	2.53		3	10	500nM	TRIM37	50	23.25	223.73	2.11
1	12	500 nM	CON	54	28.07	1524.61	2.19		2	10	500 nM	CON	54	8.18	31.83	2.39		3	10	500nM	TRIM37	54	25.14	219.72	2.54
1	12	500 nM	CON	58	30	1548.28	2.19		2	10	500 nM	CON	58	8.45	32.58	2.52		3	10	500nM	TRIM37	58	25.19	221.33	2.11
1	12	500 nM	CON	62	28.89	1545.85	2.26		2	10	500 nM	CON	62	8.5	32.98	2.35		3	10	500nM	TRIM37	62	26.97	220.13	2.75
1	12	500 nM	CON	66	28.31	1434.19	2.49		2	10	500 nM	CON	66	8.82	30.14	2.65		3	10	500nM	TRIM37	66	26.54	218.92	2.27
1	12	500 nM	CON	70	28.71	1383.59	2.04		2	10	500 nM	CON	70	8.84	32.43	2.41		3	10	500nM	TRIM37	70	26.88	218.33	2.33
1	12	500 nM	CON	74	31.06	1441.92	2.54		2	10	500 nM	CON	74	8.98	31.06	2.44		3	10	500nM	TRIM37	74	26.39	218.1	2.54
1	12	500 nM	CON	78	32.72	1506.76	2.67		2	10	500 nM	CON	78	9.19	30.52	2.5		3	10	500nM	TRIM37	78	33.43	217.03	2.63
1	12	500 nM	CON	82	32.24	1537.82	2.02		2	10	500 nM	CON	82	9.59	30.73	2.56		3	10	500nM	TRIM37	82	33.23	216.16	2.2
1	12	500 nM	CON	86	33.37	1556.13	1.99		2	10	500 nM	CON	86	8.38	29.45	2.08		3	10	500nM	TRIM37	86	34.91	216.21	2.5
1	12	500 nM	CON	90	34.19	1505.82	2.46		2	10	500 nM	CON	90	9.2	27.46	2.36		3	10	500nM	TRIM37	90	36.17	209.65	2.25
1	12	500 nM	CON	94	34.6	1404.86	2.55		2	10	500 nM	CON	94	8.83	28.73	2.64		3	10	500nM	TRIM37	94	36.99	216.26	2.6
1	12	500 nM	CON	98	34.6	1420.81	2.46		2	10	500 nM	CON	98	9.61	31.54	2.67		3	10	500nM	TRIM37	98	37.96	214.11	2.47
1	1	DMSO	TRIM37	0	170.54	222.69	2.18		2	11	500 nM	CON	0	715.16	106.56	2.51		3	1	DMSO	TRIM37	0	458.44	554.51	2.23
1	1	DMSO	TRIM37	4	173.35	228.71	2.2		2	11	500 nM	CON	4	700.35	105.26	2.4		3	1	DMSO	TRIM37	4	462.88	552.97	2.64
1	1	DMSO	TRIM37	8	175.79	234.59	2.08		2	11	500 nM	CON	8	671.02	99.29	2.62		3	1	DMSO	TRIM37	8	461.88	539.82	2.09
1	1	DMSO	TRIM37	10	6.96	216.12	2.1		2	11	500 nM	CON	10	8.05	102.32	2		3	1	DMSO	TRIM37	10	14.05	519.38	2.24
1	1	DMSO	TRIM37	14	21.86	228.75	2.08		2	11	500 nM	CON	14	19.43	90.54	2.35		3	1	DMSO	TRIM37	14	45.76	509.19	2.03
1	1	DMSO	TRIM37	18	32.69	214.08	2.12		2	11	500 nM	CON	18	25.42	104.72	2.65		3	1	DMSO	TRIM37	18	69.04	496.82	2.55
1	1	DMSO	TRIM37	22	44.87	208.86	2.19		2	11	500 nM	CON	22	28.95	104.26	2.53		3	1	DMSO	TRIM37	22	89.85	488.9	2.33
1	1	DMSO	TRIM37	26	53.02	229.97	2.27		2	11	500 nM	CON	26	31.48	96.27	2.2		3	1	DMSO	TRIM37	26	107.98	495.45	2.47
1	1	DMSO	TRIM37	30	61.39	223.98	2.38		2	11	500 nM	CON	30	34.28	94.75	2.2		3	1	DMSO	TRIM37	30	126.32	498.42	2.44
1	1	DMSO	TRIM37	34	67.04	238.87	2.52		2	11	500 nM	CON	34	36.15	88.54	2.31		3	1	DMSO	TRIM37	34	140.41	484.21	2.43
1	1	DMSO	TRIM37	38	73.8	218.76	2.42		2	11	500 nM	CON	38	39.05	96.23	2.36		3	1	DMSO	TRIM37	38	148.38	469.51	2.85
1	1	DMSO	TRIM37	42	81.29	214.19	2.3		2	11	500 nM	CON	42	41.16	92.41	2.16		3	1	DMSO	TRIM37	42	165.75	445.75	2.63
1	1	DMSO	TRIM37	46	85.86	207.25	2.67		2	11	500 nM	CON	46	42.27	101.51	2.35		3	1	DMSO	TRIM37	46	166.95	455.12	2.26
1	1	DMSO	TRIM37	50	90.44	192.44	2.7		2	11	500 nM	CON	50	43.24	100.63	2.27		3	1	DMSO	TRIM37	50	177.71	442.13	2.1
1	1	DMSO	TRIM37	54	95.05	195.17	2.03		2	11	500 nM	CON	54	44.32	99.11	1.8		3	1	DMSO	TRIM37	54	188.48	428.87	2.51
1	1	DMSO	TRIM37	58	100.35	197.04	2.42		2	11	500 nM	CON	58	45.59	93.98	2.67		3	1	DMSO	TRIM37	58	195.94	426.93	2.44
1	1	DMSO	TRIM37	62	101.54	205.55	2.07		2	11	500 nM	CON	62	47.85	90.62	2.36		3	1	DMSO	TRIM37	62	198.18	415.98	2.22
1	1	DMSO	TRIM37	66	104.97	204.41	2.52		2	11	500 nM	CON	66	49.5	95.01	2.4		3	1	DMSO	TRIM37	66	203.68	422.32	2.2
1	1	DMSO	TRIM37	70	108.23	212.91	2.2		2	11	500 nM	CON	70	50.35	96.04	2.64		3	1	DMSO	TRIM37	70	212.68	419.82	2.37
1	1	DMSO	TRIM37	74	112.49	212.01	2.42		2	11	500 nM	CON	74	50.41	96.24	2.34		3	1	DMSO	TRIM37	74	212.82	411.64	2.64
1	1	DMSO	TRIM37	78	114.75	217.95	2.23		2	11	500 nM	CON	78	51.38	97.47	2.67		3	1	DMSO	TRIM37	78	210.02	411.74	2.44
1	1	DMSO	TRIM37	82	119.54	220.03	2.26		2	11	500 nM	CON	82	54.27	82.94	2.38		3	1	DMSO	TRIM37	82	220	400.62	2.28
1	1	DMSO	TRIM37	86	121.93	217.78	2.13		2	11	500 nM	CON	86	52.19	80.77	1.96		3	1	DMSO	TRIM37	86	231.68	405.3	2.6
1	1	DMSO	TRIM37	90	126.38	219.16	2.74		2	11	500 nM	CON	90	54.99	76.49	2.46		3	1	DMSO	TRIM37	90	228.38	405.88	2.74
1	1	DMSO	TRIM37	94	126.13	220.41	2.29		2	11	500 nM	CON	94	53.25	82.33	2.41		3	1	DMSO	TRIM37	94	239.41	391.72	2.21
1	1	DMSO	TRIM37	98	128.94	220.65	1.79		2	11	500 nM	CON	98	56.06	80.55	2.4		3	1	DMSO	TRIM37	98	240.22	409.26	2.31
1	2	DMSO	TRIM37	0	74.46	22.68	2.27		2	12	500 nM	CON	0	83.62	32.28	2.38		3	2	DMSO	TRIM37	0	364.38	259.38	2.37
1	2	DMSO	TRIM37	4	76.71	23.95	2.59		2	12	500 nM	CON	4	80.16	30.83	2.27		3	2	DMSO	TRIM37	4	344.79	255.13	2.65
1	2	DMSO	TRIM37	8	80.19	25.47	2.4		2	12	500 nM	CON	8	85.15	30.54	2.08		3	2	DMSO	TRIM37	8	334.84	252.74	2.42
1	2	DMSO	TRIM37	10	4.28	26.8	2.94		2	12	500 nM	CON	10	3.65	27.38	2.52		3	2	DMSO	TRIM37	10	15.48	246.39	2.18
1	2	DMSO	TRIM37	14	7.55	28.67	2.39		2	12	500 nM	CON	14	4.87	31.64	2.54		3	2	DMSO	TRIM37	14	38.54	254.11	2.38
1	2	DMSO	TRIM37	18	12.44	29.58	2.6		2	12	500 nM	CON	18	5.58	31.73	2.3		3	2	DMSO	TRIM37	18	55.15	258.17	2.42
1	2	DMSO	TRIM37	22	14.41	29.35	2.2		2	12	500 nM	CON	22	6.67	31.53	2.45		3	2	DMSO	TRIM37	22	67.82	251.58	2.41
1	2	DMSO	TRIM37	26	17.32	28.2	2.32		2	12	500 nM	CON	26	7.01	31.13	2.4		3	2	DMSO	TRIM37	26	80.57	252.61	2.51
1	2	DMSO	TRIM37	30	22.78	25.67	2.54		2	12	500 nM	CON	30	7.56	30.05	2.34		3	2	DMSO	TRIM37	30	93.03	247.55	2.33
1	2	DMSO	TRIM37	34	25.19	28.06	2.25		2	12	500 nM	CON	34	7.84	31.04	2.33		3	2	DMSO	TRIM37	34	106.46	245.25	2.35
1	2	DMSO	TRIM37	38	26.21	26.76	2.48		2	12	500 nM	CON	38	8.15	32.91	2.35		3	2	DMSO	TRIM37	38	116.82	249.56	2.21
1	2	DMSO	TRIM37	42	27.56	24.72	2.35		2	12	500 nM	CON	42	8.75	31.71	2.52		3	2	DMSO	TRIM37	42	115	250.06	2.25
1	2	DMSO	TRIM37	46	30.35	24.13	1.81		2	12	500 nM	CON	46	8.26	32.3	2		3	2	DMSO	TRIM37	46	114.84	247.91	2.39
1	2	DMSO	TRIM37	50	31.33	28.84	2.16		2	12	500 nM	CON	50	8.99	29.94	2.2		3	2	DMSO	TRIM37	50	117.75	242.19	2.41
1	2	DMSO	TRIM37	54	33.34	28.35	2.14		2	12	500 nM	CON	54	9.26	30.95	2.28		3	2	DMSO	TRIM37	54	125.68	242.23	2.01
1	2	DMSO	TRIM37	58	35.24	29.85	2.04		2	12	500 nM	CON	58	9.5	29.98	2.18		3	2	DMSO	TRIM37	58	128.94	239.77	2.51
1	2	DMSO	TRIM37	62	35.08	32.17	2.19		2	12	500 nM	CON	62	9.47	28.6	2.11		3	2	DMSO	TRIM37	62	129.03	244.16	2.3
1	2	DMSO	TRIM37	66	37.66	31.9	2.36		2	12	500 nM	CON	66	9.62	28.63	2.08		3	2	DMSO	TRIM37	66	135.49	241.37	2.12
1	2	DMSO	TRIM37	70	42.12	26.5	2.55		2	12	500 nM	CON	70	10.48	30.7	2.3		3	2	DMSO	TRIM37	70	146.21	243.92	2.21
1	2	DMSO	TRIM37	74	39.01	25.03	2.47		2	12	500 nM	CON	74	10.65	29.04	2.13		3	2	DMSO	TRIM37	74	156.79	243.59	2.45
1	2	DMSO	TRIM37	78	39.6	27.31	2.41		2	12	500 nM	CON	78	11.25	27.41	2.51		3	2	DMSO	TRIM37	78	160.41	244.62	2.54
1	2	DMSO	TRIM37	82	39.49	27.88	2.2		2	12	500 nM	CON	82	11.01	29.86	2.2		3	2	DMSO	TRIM37	82	168.46	242.6	2.47
1	2	DMSO	TRIM37	86	40.39	26.25	2.24		2	12	500 nM	CON	86	11.3	29.15	2.13		3	2	DMSO	TRIM37	86	163.22	242.69	2.41
1	2	DMSO	TRIM37	90	43.01	26.17	2.06		2	12	500 nM	CON	90	11.12	26.85	2.25		3	2	DMSO	TRIM37	90	173.3	243.71	2.31
1	2	DMSO	TRIM37	94	44.43	26.49	2.47		2	12	500 nM	CON	94	11.12	26.42	2.32		3	2	DMSO	TRIM37	94	181.89	238.11	2.34
1	2	DMSO	TRIM37	98	46.48	28.36	2.66		2	12	500 nM	CON	98	11.93	28.71	2.42		3	2	DMSO	TRIM37	98	197.32	245.45	2.3
1	3	DMSO	TRIM37	0	355.95	134.63	2.19		2	1	DMSO	TRIM37	0	119.86	114.16	2.4		3	3	DMSO	TRIM37	0	538.75	1478.05	18.31
1	3	DMSO	TRIM37	4	356.3	135.64	2.07		2	1	DMSO	TRIM37	4	119.07	109.83	2.63		3	3	DMSO	TRIM37	4	556.91	1421.43	18.67
1	3	DMSO	TRIM37	8	371.51	142.67	2.12		2	1	DMSO	TRIM37	8	119.89	110.65	2.31		3	3	DMSO	TRIM37	8	546.69	1476.21	18.4
1	3	DMSO	TRIM37	10	22.65	120.63	2.17		2	1	DMSO	TRIM37	10	10.37	109.05	2.38		3	3	DMSO	TRIM37	10	46.99	1443.62	17.87
1	3	DMSO	TRIM37	14	50	135.34	2.51		2	1	DMSO	TRIM37	14	22.03	109.34	2.09		3	3	DMSO	TRIM37	14	92.99	1443.44	16.74
1	3	DMSO	TRIM37	18	65.4	140.45	2.59		2	1	DMSO	TRIM37	18	28.21	105.83	2.18		3	3	DMSO	TRIM37	18	124.07	1388.14	23.19
1	3	DMSO	TRIM37	22	77.69	144.4	2.39		2	1	DMSO	TRIM37	22	32.75	105.38	2.45		3	3	DMSO	TRIM37	22	146.17	1274.26	25.3
1	3	DMSO	TRIM37	26	86.72	137.97	2.33		2	1	DMSO	TRIM37	26	36.76	108.75	2.3		3	3	DMSO	TRIM37	26	165.41	1280.85	23.23
1	3	DMSO	TRIM37	30	94.5	137.65	2.29		2	1	DMSO	TRIM37	30	41.31	102.4	2.48		3	3	DMSO	TRIM37	30	185.94	1181.7	20.71
1	3	DMSO	TRIM37	34	101.57	138.8	2.31		2	1	DMSO	TRIM37	34	43.94	104.71	2.55		3	3	DMSO	TRIM37	34	196.73	1189.91	24.96
1	3	DMSO	TRIM37	38	107.87	135.01	2.08		2	1	DMSO	TRIM37	38	45.18	102.75	2.21		3	3	DMSO	TRIM37	38	211.03	1184.7	26.47
1	3	DMSO	TRIM37	42	115.71	140.21	2.22		2	1	DMSO	TRIM37	42	47.29	103.13	2.12		3	3	DMSO	TRIM37	42	225.38	1134.51	25.53
1	3	DMSO	TRIM37	46	118	134.77	2.11		2	1	DMSO	TRIM37	46	49.01	98.46	2.1		3	3	DMSO	TRIM37	46	231.82	1127.34	21.98
1	3	DMSO	TRIM37	50	120.96	128.42	2.25		2	1	DMSO	TRIM37	50	50.13	101.1	2.2		3	3	DMSO	TRIM37	50	236.54	1089.28	18.99
1	3	DMSO	TRIM37	54	127.88	128.62	2.3		2	1	DMSO	TRIM37	54	52.49	100.66	2.52		3	3	DMSO	TRIM37	54	254.7	1065.69	23.78
1	3	DMSO	TRIM37	58	131.34	131.87	2.07		2	1	DMSO	TRIM37	58	53.78	99.03	2.25		3	3	DMSO	TRIM37	58	263.67	1057.41	20.86
1	3	DMSO	TRIM37	62	135.3	135.37	2.44		2	1	DMSO	TRIM37	62	54.94	99.17	2.77		3	3	DMSO	TRIM37	62	269.41	1018.68	22.27
1	3	DMSO	TRIM37	66	139.61	137.5	2.37		2	1	DMSO	TRIM37	66	55.96	101.11	2.37		3	3	DMSO	TRIM37	66	278.34	1011.95	23.46
1	3	DMSO	TRIM37	70	143.08	144.12	2.41		2	1	DMSO	TRIM37	70	56.94	102.04	2.55		3	3	DMSO	TRIM37	70	274	1016.31	22.97
1	3	DMSO	TRIM37	74	144.06	143.75	2.22		2	1	DMSO	TRIM37	74	57.06	102.52	2.08		3	3	DMSO	TRIM37	74	289.5	949.46	23.74
1	3	DMSO	TRIM37	78	149.59	149.02	2.57		2	1	DMSO	TRIM37	78	57.63	100.76	2.28		3	3	DMSO	TRIM37	78	292.28	876.38	21.71
1	3	DMSO	TRIM37	82	154.12	150.86	2.17		2	1	DMSO	TRIM37	82	57.91	100.74	2.13		3	3	DMSO	TRIM37	82	298.87	891.02	22.99
1	3	DMSO	TRIM37	86	155.28	151.55	1.89		2	1	DMSO	TRIM37	86	58.9	96.83	2.07		3	3	DMSO	TRIM37	86	299.71	898.86	21.1
1	3	DMSO	TRIM37	90	155.38	151.28	1.89		2	1	DMSO	TRIM37	90	60.99	102.31	2.64		3	3	DMSO	TRIM37	90	298.28	910.25	19.38
1	3	DMSO	TRIM37	94	158.58	148.55	2.35		2	1	DMSO	TRIM37	94	59.63	101.29	2		3	3	DMSO	TRIM37	94	299	921.38	19.9
1	3	DMSO	TRIM37	98	164.37	148.23	2.23		2	1	DMSO	TRIM37	98	59.41	98.74	2.34		3	3	DMSO	TRIM37	98	317.71	898.83	21.93
1	4	DMSO	TRIM37	0	211.1	58.74	2.19		2	2	DMSO	TRIM37	0	160.46	71.17	2.39		3	4	DMSO	TRIM37	0	339.26	442.29	6.14
1	4	DMSO	TRIM37	4	209.85	58.7	2.03		2	2	DMSO	TRIM37	4	156.68	69.22	2.33		3	4	DMSO	TRIM37	4	332.18	452.54	5.15
1	4	DMSO	TRIM37	8	204.83	59.81	2.49		2	2	DMSO	TRIM37	8	160.85	68.57	2.47		3	4	DMSO	TRIM37	8	344.77	438.06	5.52
1	4	DMSO	TRIM37	10	5.29	51.94	2.27		2	2	DMSO	TRIM37	10	3.98	64.32	2.25		3	4	DMSO	TRIM37	10	23.09	474.97	5.64
1	4	DMSO	TRIM37	14	15.7	51.42	2.2		2	2	DMSO	TRIM37	14	9.26	70.04	2.36		3	4	DMSO	TRIM37	14	51.15	459.06	5.21
1	4	DMSO	TRIM37	18	26.46	43.41	2.1		2	2	DMSO	TRIM37	18	14.5	64.9	2.33		3	4	DMSO	TRIM37	18	67.1	457.46	5.66
1	4	DMSO	TRIM37	22	33.04	44.11	2.34		2	2	DMSO	TRIM37	22	18.67	74.16	2.33		3	4	DMSO	TRIM37	22	79.66	459.44	5.18
1	4	DMSO	TRIM37	26	34.26	39.98	2.05		2	2	DMSO	TRIM37	26	22.29	66.99	2.35		3	4	DMSO	TRIM37	26	96.67	447.07	5.69
1	4	DMSO	TRIM37	30	46.85	40	1.99		2	2	DMSO	TRIM37	30	26.14	65.39	2.03		3	4	DMSO	TRIM37	30	106.9	448.62	5.16
1	4	DMSO	TRIM37	34	49.71	39.43	2.27		2	2	DMSO	TRIM37	34	29.55	66.86	2.18		3	4	DMSO	TRIM37	34	119.66	453.2	5.36
1	4	DMSO	TRIM37	38	61.29	50.99	2.39		2	2	DMSO	TRIM37	38	32.29	62.51	2.47		3	4	DMSO	TRIM37	38	125.44	454.48	5.29
1	4	DMSO	TRIM37	42	97.12	44.66	1.97		2	2	DMSO	TRIM37	42	35.49	65.74	2.3		3	4	DMSO	TRIM37	42	132.87	432.73	5.19
1	4	DMSO	TRIM37	46	93.65	45.72	2.58		2	2	DMSO	TRIM37	46	38.43	64.71	2.5		3	4	DMSO	TRIM37	46	141.11	430.56	5.27
1	4	DMSO	TRIM37	50	86.89	43.85	2.6		2	2	DMSO	TRIM37	50	41.13	61.11	2.57		3	4	DMSO	TRIM37	50	147.55	430.15	5.6
1	4	DMSO	TRIM37	54	91.05	43.33	2.24		2	2	DMSO	TRIM37	54	43.12	61.72	2.35		3	4	DMSO	TRIM37	54	154.19	432.97	4.75
1	4	DMSO	TRIM37	58	102.64	39.16	2.16		2	2	DMSO	TRIM37	58	45.65	58.77	2.43		3	4	DMSO	TRIM37	58	159.14	451.92	5.24
1	4	DMSO	TRIM37	62	103.69	42.53	2.47		2	2	DMSO	TRIM37	62	47.84	63.59	2.56		3	4	DMSO	TRIM37	62	165.43	428.62	4.59
1	4	DMSO	TRIM37	66	105.12	42.88	2.1		2	2	DMSO	TRIM37	66	49.48	57.71	2.11		3	4	DMSO	TRIM37	66	167.31	452.68	5.85
1	4	DMSO	TRIM37	70	104.2	46.77	2.45		2	2	DMSO	TRIM37	70	51.05	63.01	2.15		3	4	DMSO	TRIM37	70	166.56	446.94	4.95
1	4	DMSO	TRIM37	74	103.45	44.62	2.31		2	2	DMSO	TRIM37	74	53.73	62.97	2.07		3	4	DMSO	TRIM37	74	176.34	441.88	4.92
1	4	DMSO	TRIM37	78	106.81	41.99	2.41		2	2	DMSO	TRIM37	78	54.76	60.18	2.11		3	4	DMSO	TRIM37	78	179.77	444.54	5.28
1	4	DMSO	TRIM37	82	106.66	43.96	2.44		2	2	DMSO	TRIM37	82	57.57	60.58	2.42		3	4	DMSO	TRIM37	82	181.86	434.06	5.11
1	4	DMSO	TRIM37	86	109.99	46.84	2.36		2	2	DMSO	TRIM37	86	59.2	60.51	2.33		3	4	DMSO	TRIM37	86	183.37	434.22	4.49
1	4	DMSO	TRIM37	90	115.28	49.93	2.32		2	2	DMSO	TRIM37	90	60.88	61.41	2.46		3	4	DMSO	TRIM37	90	187.92	437.42	4.91
1	4	DMSO	TRIM37	94	115.24	46.29	2.14		2	2	DMSO	TRIM37	94	60.59	65.97	2.18		3	4	DMSO	TRIM37	94	189.72	439.46	4.94
1	4	DMSO	TRIM37	98	116.44	49.2	2.65		2	2	DMSO	TRIM37	98	64.02	59.67	2.15		3	4	DMSO	TRIM37	98	190.12	443.6	4.95
1	5	DMSO	TRIM37	0	46.09	58.97	2.45		2	3	DMSO	TRIM37	0	161.89	127.6	2.75		3	5	DMSO	TRIM37	0	234.74	557.37	25.43
1	5	DMSO	TRIM37	4	44.86	58.58	2.21		2	3	DMSO	TRIM37	4	162.78	128.02	2.37		3	5	DMSO	TRIM37	4	235.09	563.58	23.63
1	5	DMSO	TRIM37	8	44.34	59.75	2.48		2	3	DMSO	TRIM37	8	160.24	126.65	2.24		3	5	DMSO	TRIM37	8	235.59	573.53	21.42
1	5	DMSO	TRIM37	10	3.35	55.51	2.08		2	3	DMSO	TRIM37	10	10.36	123.31	2.11		3	5	DMSO	TRIM37	10	13.22	587.12	19.56
1	5	DMSO	TRIM37	14	5.69	56.77	2.19		2	3	DMSO	TRIM37	14	22.06	131.63	2.61		3	5	DMSO	TRIM37	14	34.58	586.52	16.17
1	5	DMSO	TRIM37	18	9.24	56.39	2.69		2	3	DMSO	TRIM37	18	27.24	128.57	2.15		3	5	DMSO	TRIM37	18	49.27	570.85	12.74
1	5	DMSO	TRIM37	22	10.67	61.76	2.41		2	3	DMSO	TRIM37	22	32.31	125.84	2.05		3	5	DMSO	TRIM37	22	61.93	572.01	10.32
1	5	DMSO	TRIM37	26	12.26	61.15	2.46		2	3	DMSO	TRIM37	26	37.68	124.93	2.41		3	5	DMSO	TRIM37	26	73.16	611.55	7.85
1	5	DMSO	TRIM37	30	13.86	58.86	2.39		2	3	DMSO	TRIM37	30	40.99	124.85	2.02		3	5	DMSO	TRIM37	30	80.23	575.27	6.14
1	5	DMSO	TRIM37	34	15.47	59.34	2.72		2	3	DMSO	TRIM37	34	44.77	125.56	2.56		3	5	DMSO	TRIM37	34	89.64	565.98	4.95
1	5	DMSO	TRIM37	38	16.72	60.94	1.97		2	3	DMSO	TRIM37	38	48.01	125.67	2.39		3	5	DMSO	TRIM37	38	95.75	626.99	3.94
1	5	DMSO	TRIM37	42	19.58	60.93	2.44		2	3	DMSO	TRIM37	42	52.77	121.57	2.56		3	5	DMSO	TRIM37	42	102.07	596.92	3.57
1	5	DMSO	TRIM37	46	19.5	55.95	2.38		2	3	DMSO	TRIM37	46	53.21	119.18	2.13		3	5	DMSO	TRIM37	46	108.77	588.48	3.58
1	5	DMSO	TRIM37	50	20.1	54.11	2.61		2	3	DMSO	TRIM37	50	56.67	120.66	2.41		3	5	DMSO	TRIM37	50	113.63	598.17	3.5
1	5	DMSO	TRIM37	54	21.2	55.05	2.37		2	3	DMSO	TRIM37	54	58.49	122.69	2.28		3	5	DMSO	TRIM37	54	117.3	586.83	3.34
1	5	DMSO	TRIM37	58	22.27	56.74	2.69		2	3	DMSO	TRIM37	58	60.68	120.72	2.3		3	5	DMSO	TRIM37	58	121.78	580.51	3.19
1	5	DMSO	TRIM37	62	23.45	59.8	2.05		2	3	DMSO	TRIM37	62	63.63	118.85	2.62		3	5	DMSO	TRIM37	62	125.81	603.64	3.1
1	5	DMSO	TRIM37	66	24.61	59.71	2.33		2	3	DMSO	TRIM37	66	64.11	116.33	2.44		3	5	DMSO	TRIM37	66	130.28	585.36	3.64
1	5	DMSO	TRIM37	70	26.81	58.97	2.58		2	3	DMSO	TRIM37	70	65.66	113.88	2.37		3	5	DMSO	TRIM37	70	134.29	576.8	3.61
1	5	DMSO	TRIM37	74	26.02	59.03	2.11		2	3	DMSO	TRIM37	74	67.53	108.69	2.37		3	5	DMSO	TRIM37	74	136.48	594.8	3.34
1	5	DMSO	TRIM37	78	26.82	61.4	2.5		2	3	DMSO	TRIM37	78	70.49	91.64	2.49		3	5	DMSO	TRIM37	78	139.18	559.02	3.33
1	5	DMSO	TRIM37	82	26.87	64	2.11		2	3	DMSO	TRIM37	82	71.07	96.01	2.05		3	5	DMSO	TRIM37	82	141.97	567.37	3.46
1	5	DMSO	TRIM37	86	24.69	66.07	2.14		2	3	DMSO	TRIM37	86	72.39	100.54	2.47		3	5	DMSO	TRIM37	86	145	593.35	3.47
1	5	DMSO	TRIM37	90	25.28	65.67	2.56		2	3	DMSO	TRIM37	90	72.53	106.42	2.03		3	5	DMSO	TRIM37	90	145	548.59	3.51
1	5	DMSO	TRIM37	94	26.3	62.25	2.72		2	3	DMSO	TRIM37	94	74.53	109.84	2.49		3	5	DMSO	TRIM37	94	146.84	553.29	3.16
1	5	DMSO	TRIM37	98	24.79	63.35	2.15		2	3	DMSO	TRIM37	98	74.57	102.01	2.37		3	5	DMSO	TRIM37	98	150.31	571.46	3.19
1	6	DMSO	TRIM37	0	74.49	39.54	1.81		2	4	DMSO	TRIM37	0	480.87	170.33	2.33		3	6	DMSO	TRIM37	0	149.03	116.73	2.56
1	6	DMSO	TRIM37	4	75.86	39.32	2.64		2	4	DMSO	TRIM37	4	477.06	170.01	2.2		3	6	DMSO	TRIM37	4	149.98	117.33	2.59
1	6	DMSO	TRIM37	8	74.09	41.03	1.98		2	4	DMSO	TRIM37	8	465.57	172.64	2.65		3	6	DMSO	TRIM37	8	137.49	118.89	2.53
1	6	DMSO	TRIM37	10	3.5	38.43	2.2		2	4	DMSO	TRIM37	10	15.03	165.99	2.44		3	6	DMSO	TRIM37	10	5.97	120.8	2.7
1	6	DMSO	TRIM37	14	7.57	38.26	2.19		2	4	DMSO	TRIM37	14	34.77	160.77	2.26		3	6	DMSO	TRIM37	14	12.56	114.16	2.21
1	6	DMSO	TRIM37	18	11.19	38.36	2.12		2	4	DMSO	TRIM37	18	48.97	158.93	2.5		3	6	DMSO	TRIM37	18	18.99	116.76	2.37
1	6	DMSO	TRIM37	22	14.8	36.61	2.19		2	4	DMSO	TRIM37	22	57.18	161.36	2.2		3	6	DMSO	TRIM37	22	24.03	115.06	2.51
1	6	DMSO	TRIM37	26	17.29	35.76	2.07		2	4	DMSO	TRIM37	26	66.86	158.16	2.6		3	6	DMSO	TRIM37	26	28.36	113.52	2.66
1	6	DMSO	TRIM37	30	19.78	36.25	2.32		2	4	DMSO	TRIM37	30	73.29	160.72	2.29		3	6	DMSO	TRIM37	30	32.5	112.26	2.63
1	6	DMSO	TRIM37	34	22.53	34.51	2.58		2	4	DMSO	TRIM37	34	81.27	159.62	2.27		3	6	DMSO	TRIM37	34	37.06	113.42	2.5
1	6	DMSO	TRIM37	38	22.99	35.78	1.92		2	4	DMSO	TRIM37	38	86.63	157.29	2.06		3	6	DMSO	TRIM37	38	40.13	108.66	2.72
1	6	DMSO	TRIM37	42	24.99	35.14	2		2	4	DMSO	TRIM37	42	93.44	155.64	2.09		3	6	DMSO	TRIM37	42	45.04	109.07	2.5
1	6	DMSO	TRIM37	46	26.06	35.73	2		2	4	DMSO	TRIM37	46	97.46	155.27	2.36		3	6	DMSO	TRIM37	46	47.39	114.69	2.42
1	6	DMSO	TRIM37	50	28.43	36.46	2.39		2	4	DMSO	TRIM37	50	100.89	153.29	2.12		3	6	DMSO	TRIM37	50	50.03	111.62	2.66
1	6	DMSO	TRIM37	54	29.28	37.59	2.38		2	4	DMSO	TRIM37	54	106	152.44	2.1		3	6	DMSO	TRIM37	54	51.49	110.62	2.6
1	6	DMSO	TRIM37	58	30.06	36.02	2.04		2	4	DMSO	TRIM37	58	109.09	154.92	2.14		3	6	DMSO	TRIM37	58	54.53	104.11	2.19
1	6	DMSO	TRIM37	62	31.23	35.28	2.22		2	4	DMSO	TRIM37	62	112.02	154.04	2.1		3	6	DMSO	TRIM37	62	57.76	109.71	2.56
1	6	DMSO	TRIM37	66	31.77	34.19	2.11		2	4	DMSO	TRIM37	66	116.07	154.73	2.31		3	6	DMSO	TRIM37	66	59.79	108.16	2.59
1	6	DMSO	TRIM37	70	33.11	36.76	2.49		2	4	DMSO	TRIM37	70	121.15	152.4	2.51		3	6	DMSO	TRIM37	70	60.71	111.85	2.58
1	6	DMSO	TRIM37	74	34.6	38	2.37		2	4	DMSO	TRIM37	74	125.87	150.17	2.32		3	6	DMSO	TRIM37	74	61.16	109.38	2.64
1	6	DMSO	TRIM37	78	34.76	38.15	2.24		2	4	DMSO	TRIM37	78	124.88	151.31	2.27		3	6	DMSO	TRIM37	78	68.34	108.25	2.7
1	6	DMSO	TRIM37	82	35.4	40.58	2.44		2	4	DMSO	TRIM37	82	127.8	151.59	2.26		3	6	DMSO	TRIM37	82	70.96	109.02	2.04
1	6	DMSO	TRIM37	86	36.63	40.03	2.34		2	4	DMSO	TRIM37	86	129.41	150.33	2.3		3	6	DMSO	TRIM37	86	72.47	102.31	2.25
1	6	DMSO	TRIM37	90	34.68	38.19	2.27		2	4	DMSO	TRIM37	90	129.72	148.18	2.2		3	6	DMSO	TRIM37	90	74.71	104.97	2.52
1	6	DMSO	TRIM37	94	37.03	36.09	2.1		2	4	DMSO	TRIM37	94	133.96	144.62	2.46		3	6	DMSO	TRIM37	94	77.84	106.17	2.63
1	6	DMSO	TRIM37	98	37.42	36.12	2.23		2	4	DMSO	TRIM37	98	134.81	147.71	2.27		3	6	DMSO	TRIM37	98	78.25	104.57	2.38
1	7	DMSO	TRIM37	0	92.47	54.4	2.39		2	5	DMSO	TRIM37	0	102.66	69.72	2.47		3	7	DMSO	TRIM37	0	356.51	312.82	2.62
1	7	DMSO	TRIM37	4	93.05	55.13	2.27		2	5	DMSO	TRIM37	4	100.18	66.5	2.41		3	7	DMSO	TRIM37	4	356.3	312.37	2.01
1	7	DMSO	TRIM37	8	91.81	55.17	2.42		2	5	DMSO	TRIM37	8	104.97	66.47	2.33		3	7	DMSO	TRIM37	8	349.57	296.07	2.25
1	7	DMSO	TRIM37	10	3.52	53.25	2.09		2	5	DMSO	TRIM37	10	4.43	69.38	2.2		3	7	DMSO	TRIM37	10	11.87	302.53	2.34
1	7	DMSO	TRIM37	14	8.54	54.35	2.15		2	5	DMSO	TRIM37	14	8.14	68.61	2.07		3	7	DMSO	TRIM37	14	27.49	295.28	2.45
1	7	DMSO	TRIM37	18	12.3	54.89	2.15		2	5	DMSO	TRIM37	18	11.68	73.89	2.41		3	7	DMSO	TRIM37	18	38.41	299.81	2.31
1	7	DMSO	TRIM37	22	16.66	55.97	2.56		2	5	DMSO	TRIM37	22	14.42	72.88	2.67		3	7	DMSO	TRIM37	22	51.43	320.87	2.32
1	7	DMSO	TRIM37	26	19.66	55.6	2.61		2	5	DMSO	TRIM37	26	15.9	74.72	2.09		3	7	DMSO	TRIM37	26	57.42	293.3	2.23
1	7	DMSO	TRIM37	30	22.35	54.29	2.16		2	5	DMSO	TRIM37	30	18	65.87	2.35		3	7	DMSO	TRIM37	30	66.66	293.83	2.54
1	7	DMSO	TRIM37	34	25.31	55.52	2.42		2	5	DMSO	TRIM37	34	19.26	70	2.35		3	7	DMSO	TRIM37	34	72.78	290.32	2.62
1	7	DMSO	TRIM37	38	28.16	56.61	2.41		2	5	DMSO	TRIM37	38	19.44	73.63	2.21		3	7	DMSO	TRIM37	38	78.1	281.65	2.22
1	7	DMSO	TRIM37	42	29.36	56.8	2.18		2	5	DMSO	TRIM37	42	21.84	76.75	2.25		3	7	DMSO	TRIM37	42	87.79	301.02	2.36
1	7	DMSO	TRIM37	46	31.88	55.14	2.3		2	5	DMSO	TRIM37	46	22.91	70.34	2.03		3	7	DMSO	TRIM37	46	89.54	290.79	2.41
1	7	DMSO	TRIM37	50	34	54.53	2.54		2	5	DMSO	TRIM37	50	24.82	70.66	2.29		3	7	DMSO	TRIM37	50	96.23	300.49	2.2
1	7	DMSO	TRIM37	54	36.06	53.58	2.23		2	5	DMSO	TRIM37	54	25.93	72.76	2.4		3	7	DMSO	TRIM37	54	104.21	291.77	2.26
1	7	DMSO	TRIM37	58	37.63	54.12	2.42		2	5	DMSO	TRIM37	58	26.58	75.43	2.36		3	7	DMSO	TRIM37	58	107.6	281.94	2.34
1	7	DMSO	TRIM37	62	39.47	54.41	2.29		2	5	DMSO	TRIM37	62	27.5	74.49	2.35		3	7	DMSO	TRIM37	62	111.57	281.43	2.2
1	7	DMSO	TRIM37	66	41.73	54.66	2.28		2	5	DMSO	TRIM37	66	27.35	70	2.31		3	7	DMSO	TRIM37	66	115.46	290.71	2.59
1	7	DMSO	TRIM37	70	42.57	53.83	2.14		2	5	DMSO	TRIM37	70	27.94	72.05	2.74		3	7	DMSO	TRIM37	70	120.12	294.85	2.44
1	7	DMSO	TRIM37	74	43.99	54.81	2.07		2	5	DMSO	TRIM37	74	26.55	65.55	2.27		3	7	DMSO	TRIM37	74	118.73	284.84	1.94
1	7	DMSO	TRIM37	78	43.75	54.37	2.42		2	5	DMSO	TRIM37	78	28.64	68.45	2.68		3	7	DMSO	TRIM37	78	128.63	294.64	2.48
1	7	DMSO	TRIM37	82	46.65	54.4	2.43		2	5	DMSO	TRIM37	82	28.32	68.2	2.2		3	7	DMSO	TRIM37	82	132.36	300.45	1.98
1	7	DMSO	TRIM37	86	46.19	54.63	2.09		2	5	DMSO	TRIM37	86	29.64	70.31	2.24		3	7	DMSO	TRIM37	86	127.62	282.14	2.45
1	7	DMSO	TRIM37	90	48.25	54.01	2.33		2	5	DMSO	TRIM37	90	30.13	68.75	2.48		3	7	DMSO	TRIM37	90	138.98	297.1	2.23
1	7	DMSO	TRIM37	94	48.96	54.31	2.37		2	5	DMSO	TRIM37	94	29.69	70.26	2.31		3	7	DMSO	TRIM37	94	138.93	300.74	2.89
1	7	DMSO	TRIM37	98	49.94	49.88	2.18		2	5	DMSO	TRIM37	98	29.11	71.63	2.25		3	7	DMSO	TRIM37	98	141.2	296.22	2.32
1	8	DMSO	TRIM37	0	113.63	134.13	2.2		2	6	DMSO	TRIM37	0	93.94	59.85	2.6		3	8	DMSO	TRIM37	0	269.21	220.52	2.41
1	8	DMSO	TRIM37	4	116.33	133.61	2.49		2	6	DMSO	TRIM37	4	89.93	58.52	2.36		3	8	DMSO	TRIM37	4	265	229.38	2.36
1	8	DMSO	TRIM37	8	116	127.45	2.23		2	6	DMSO	TRIM37	8	92.87	59.98	2.42		3	8	DMSO	TRIM37	8	268.47	221.41	2.21
1	8	DMSO	TRIM37	10	5.67	124.97	2.34		2	6	DMSO	TRIM37	10	5.03	60.81	2.58		3	8	DMSO	TRIM37	10	14.48	215.14	2.31
1	8	DMSO	TRIM37	14	13.91	127.35	2.33		2	6	DMSO	TRIM37	14	10.92	57.44	2.56		3	8	DMSO	TRIM37	14	34.08	213.05	2.11
1	8	DMSO	TRIM37	18	20	119.26	2.11		2	6	DMSO	TRIM37	18	14.49	53.87	2.23		3	8	DMSO	TRIM37	18	46.24	210.55	2.51
1	8	DMSO	TRIM37	22	26.32	120.5	2.11		2	6	DMSO	TRIM37	22	19.52	58.84	2.67		3	8	DMSO	TRIM37	22	56.26	215.58	2.29
1	8	DMSO	TRIM37	26	32.29	120.1	2.16		2	6	DMSO	TRIM37	26	21.91	57.34	2.55		3	8	DMSO	TRIM37	26	64.97	206.72	2.6
1	8	DMSO	TRIM37	30	35.82	101.22	1.95		2	6	DMSO	TRIM37	30	24.37	57.29	2.09		3	8	DMSO	TRIM37	30	73.44	208.76	2.24
1	8	DMSO	TRIM37	34	40.48	98.28	2.68		2	6	DMSO	TRIM37	34	27.91	57.39	2.75		3	8	DMSO	TRIM37	34	80.34	204.32	2.34
1	8	DMSO	TRIM37	38	44.17	113.87	2.46		2	6	DMSO	TRIM37	38	30.79	54.7	2.72		3	8	DMSO	TRIM37	38	88.31	201.87	2.6
1	8	DMSO	TRIM37	42	48.92	117.11	2.32		2	6	DMSO	TRIM37	42	32.04	57.42	2.56		3	8	DMSO	TRIM37	42	94.24	201.81	2.54
1	8	DMSO	TRIM37	46	53.11	119.53	2.47		2	6	DMSO	TRIM37	46	34.79	55.55	2.36		3	8	DMSO	TRIM37	46	100.23	202.96	2.49
1	8	DMSO	TRIM37	50	56.83	120.73	2.34		2	6	DMSO	TRIM37	50	36.21	55.27	2.52		3	8	DMSO	TRIM37	50	104.24	199.29	2.4
1	8	DMSO	TRIM37	54	59.1	122.19	2.12		2	6	DMSO	TRIM37	54	38.06	55.21	2.5		3	8	DMSO	TRIM37	54	111.43	201.03	2.4
1	8	DMSO	TRIM37	58	60.9	130.91	2.34		2	6	DMSO	TRIM37	58	38.88	55.64	2.32		3	8	DMSO	TRIM37	58	112.96	196.68	2.54
1	8	DMSO	TRIM37	62	64.42	122.77	2.44		2	6	DMSO	TRIM37	62	39.47	54.01	2.15		3	8	DMSO	TRIM37	62	113.52	191.03	2.35
1	8	DMSO	TRIM37	66	65.91	104.55	2.45		2	6	DMSO	TRIM37	66	42.78	55.61	2.52		3	8	DMSO	TRIM37	66	117.62	196.21	2.12
1	8	DMSO	TRIM37	70	68.04	119.56	2.33		2	6	DMSO	TRIM37	70	42.25	52.34	2.47		3	8	DMSO	TRIM37	70	116.21	197.57	2.28
1	8	DMSO	TRIM37	74	69.37	116.09	2.06		2	6	DMSO	TRIM37	74	42.16	54.73	2.52		3	8	DMSO	TRIM37	74	122.31	197.04	2.43
1	8	DMSO	TRIM37	78	71.14	111.02	2.7		2	6	DMSO	TRIM37	78	45.86	54.83	2.4		3	8	DMSO	TRIM37	78	129.54	190.42	2.45
1	8	DMSO	TRIM37	82	73.54	117.01	2.57		2	6	DMSO	TRIM37	82	46.02	54.01	2.57		3	8	DMSO	TRIM37	82	132.42	190.86	2.09
1	8	DMSO	TRIM37	86	74.67	122.84	2.1		2	6	DMSO	TRIM37	86	46.08	53.74	2.09		3	8	DMSO	TRIM37	86	136.38	192.74	2.33
1	8	DMSO	TRIM37	90	77.2	129.23	2.34		2	6	DMSO	TRIM37	90	48.87	53.65	2.49		3	8	DMSO	TRIM37	90	138.36	187.16	2.52
1	8	DMSO	TRIM37	94	77.22	124.04	2.58		2	6	DMSO	TRIM37	94	50.68	54.09	2.69		3	8	DMSO	TRIM37	94	142.94	190.74	2.34
1	8	DMSO	TRIM37	98	80.15	110.95	1.94		2	6	DMSO	TRIM37	98	50.38	52.72	2.68		3	8	DMSO	TRIM37	98	143.43	194.88	2.26
1	9	DMSO	TRIM37	0	66.83	38.58	1.85		2	7	DMSO	TRIM37	0	119.5	157.13	2.65		3	9	DMSO	TRIM37	0	415.79	1587.69	2.82
1	9	DMSO	TRIM37	4	69.23	32.87	2.61		2	7	DMSO	TRIM37	4	118.04	160.7	2.29		3	9	DMSO	TRIM37	4	426.06	1584.45	2.82
1	9	DMSO	TRIM37	8	73.99	32.88	2.27		2	7	DMSO	TRIM37	8	118.26	160.31	2.19		3	9	DMSO	TRIM37	8	422	1578.34	2.89
1	9	DMSO	TRIM37	10	4.21	28.97	2.52		2	7	DMSO	TRIM37	10	11.77	159.16	2.56		3	9	DMSO	TRIM37	10	19.5	1563.14	2.95
1	9	DMSO	TRIM37	14	8.31	32.74	2.41		2	7	DMSO	TRIM37	14	23.59	160.91	2.36		3	9	DMSO	TRIM37	14	45.8	1555.73	2.68
1	9	DMSO	TRIM37	18	11.19	30.56	2.31		2	7	DMSO	TRIM37	18	30.62	155.11	2.52		3	9	DMSO	TRIM37	18	61.5	1556.71	2.69
1	9	DMSO	TRIM37	22	14.22	35.84	2.44		2	7	DMSO	TRIM37	22	36.2	157.64	2.26		3	9	DMSO	TRIM37	22	75.33	1541.1	2.86
1	9	DMSO	TRIM37	26	17.16	35.95	2.27		2	7	DMSO	TRIM37	26	40.81	157.76	2.27		3	9	DMSO	TRIM37	26	87.83	1552.08	2.88
1	9	DMSO	TRIM37	30	18.29	35.08	2.5		2	7	DMSO	TRIM37	30	44.85	157.15	1.84		3	9	DMSO	TRIM37	30	95.85	1545.32	3.13
1	9	DMSO	TRIM37	34	19.62	34.8	2.06		2	7	DMSO	TRIM37	34	49.41	149.82	2.53		3	9	DMSO	TRIM37	34	104.94	1529.61	2.81
1	9	DMSO	TRIM37	38	21.41	31.73	2.13		2	7	DMSO	TRIM37	38	54.5	155.47	2.19		3	9	DMSO	TRIM37	38	112.71	1527.78	2.5
1	9	DMSO	TRIM37	42	21.23	31.83	2.57		2	7	DMSO	TRIM37	42	57.38	160.28	2.36		3	9	DMSO	TRIM37	42	119.76	1522.57	2.77
1	9	DMSO	TRIM37	46	24.03	32.85	2.28		2	7	DMSO	TRIM37	46	61.83	161.29	2.53		3	9	DMSO	TRIM37	46	127.5	1515.23	2.83
1	9	DMSO	TRIM37	50	24.27	33.13	2.46		2	7	DMSO	TRIM37	50	62.13	158.59	2.54		3	9	DMSO	TRIM37	50	130.32	1507.72	2.62
1	9	DMSO	TRIM37	54	23.95	33.39	2.44		2	7	DMSO	TRIM37	54	65.75	160.99	2.36		3	9	DMSO	TRIM37	54	138.32	1505.97	3.19
1	9	DMSO	TRIM37	58	28.89	35.56	2.29		2	7	DMSO	TRIM37	58	65.73	158.6	2.14		3	9	DMSO	TRIM37	58	144.04	1502.27	2.86
1	9	DMSO	TRIM37	62	27.13	33.04	2.55		2	7	DMSO	TRIM37	62	68	158.88	2.38		3	9	DMSO	TRIM37	62	147.31	1487.23	2.95
1	9	DMSO	TRIM37	66	32.05	29.24	1.94		2	7	DMSO	TRIM37	66	71.51	153.63	2.41		3	9	DMSO	TRIM37	66	153.05	1483.93	3.09
1	9	DMSO	TRIM37	70	33.75	26.29	2.14		2	7	DMSO	TRIM37	70	73.83	152.75	2.31		3	9	DMSO	TRIM37	70	157.77	1472.17	2.95
1	9	DMSO	TRIM37	74	35.74	27.28	2.34		2	7	DMSO	TRIM37	74	74.94	150.12	2.44		3	9	DMSO	TRIM37	74	158.64	1465.97	2.94
1	9	DMSO	TRIM37	78	35.38	30.36	2.03		2	7	DMSO	TRIM37	78	76.41	144.23	2.07		3	9	DMSO	TRIM37	78	161.74	1453.44	3.09
1	9	DMSO	TRIM37	82	31.56	32.22	2.3		2	7	DMSO	TRIM37	82	79	139.3	2.24		3	9	DMSO	TRIM37	82	166.45	1462.49	3
1	9	DMSO	TRIM37	86	37.44	32.21	2.33		2	7	DMSO	TRIM37	86	78.03	127.69	2.26		3	9	DMSO	TRIM37	86	167.59	1467.89	2.82
1	9	DMSO	TRIM37	90	39.42	30.11	2.2		2	7	DMSO	TRIM37	90	72.35	124.67	2.28		3	9	DMSO	TRIM37	90	170.71	1452.43	2.75
1	9	DMSO	TRIM37	94	39.59	28.78	2.08		2	7	DMSO	TRIM37	94	80.83	127.35	2.21		3	9	DMSO	TRIM37	94	173.19	1442.83	3.1
1	9	DMSO	TRIM37	98	39.71	31.8	2.45		2	7	DMSO	TRIM37	98	80.78	130.18	2.35		3	9	DMSO	TRIM37	98	176.53	1436.15	2.97
1	10	DMSO	TRIM37	0	228.53	70.54	2.11		2	8	DMSO	TRIM37	0	87.25	65.8	2.13		3	10	DMSO	TRIM37	0	224.05	153.98	2.54
1	10	DMSO	TRIM37	4	235.94	62.52	2.19		2	8	DMSO	TRIM37	4	87.83	65.83	2.65		3	10	DMSO	TRIM37	4	226.33	154.89	2.55
1	10	DMSO	TRIM37	8	229.42	57.78	2.35		2	8	DMSO	TRIM37	8	87.46	65.97	2.59		3	10	DMSO	TRIM37	8	228.5	157.52	2.21
1	10	DMSO	TRIM37	10	5.17	53.63	2.35		2	8	DMSO	TRIM37	10	14.4	63.99	2.38		3	10	DMSO	TRIM37	10	11.93	132.74	2.35
1	10	DMSO	TRIM37	14	13.84	62.8	2.31		2	8	DMSO	TRIM37	14	26.4	64.45	2.48		3	10	DMSO	TRIM37	14	27.18	133.69	2.43
1	10	DMSO	TRIM37	18	20.31	66.23	2.51		2	8	DMSO	TRIM37	18	31.65	64.01	2.4		3	10	DMSO	TRIM37	18	36.48	123.84	2.43
1	10	DMSO	TRIM37	22	22.85	62	2.25		2	8	DMSO	TRIM37	22	36.08	64.16	2.36		3	10	DMSO	TRIM37	22	46.6	127.52	2.65
1	10	DMSO	TRIM37	26	29.93	60.67	2.35		2	8	DMSO	TRIM37	26	36.85	63.76	2.24		3	10	DMSO	TRIM37	26	52.01	123.28	2.28
1	10	DMSO	TRIM37	30	31.19	60.52	2.19		2	8	DMSO	TRIM37	30	40.28	63.17	2.39		3	10	DMSO	TRIM37	30	59.44	120.49	2.28
1	10	DMSO	TRIM37	34	38	61.01	2.13		2	8	DMSO	TRIM37	34	42.93	63.5	2.4		3	10	DMSO	TRIM37	34	63.55	125.07	2.92
1	10	DMSO	TRIM37	38	42.28	64.61	2.45		2	8	DMSO	TRIM37	38	44.61	61.27	2.34		3	10	DMSO	TRIM37	38	70.92	122.87	2.34
1	10	DMSO	TRIM37	42	46.9	63.44	2.36		2	8	DMSO	TRIM37	42	47.09	62.93	2.27		3	10	DMSO	TRIM37	42	72.49	109.54	2
1	10	DMSO	TRIM37	46	48.99	63.28	2.45		2	8	DMSO	TRIM37	46	48.56	62.28	2.36		3	10	DMSO	TRIM37	46	78.66	116.93	2.2
1	10	DMSO	TRIM37	50	53.73	66.38	2.32		2	8	DMSO	TRIM37	50	50.18	61.48	2.56		3	10	DMSO	TRIM37	50	82.7	110.73	2.28
1	10	DMSO	TRIM37	54	58.21	62.76	2.63		2	8	DMSO	TRIM37	54	51.58	60.56	2.1		3	10	DMSO	TRIM37	54	86.65	109.82	2.36
1	10	DMSO	TRIM37	58	59.75	60.49	2.59		2	8	DMSO	TRIM37	58	55.2	63.57	2.31		3	10	DMSO	TRIM37	58	91.82	118.76	2.27
1	10	DMSO	TRIM37	62	60.7	58.29	2.68		2	8	DMSO	TRIM37	62	56.27	62.03	2.24		3	10	DMSO	TRIM37	62	93.89	112.58	2.46
1	10	DMSO	TRIM37	66	60.51	61.74	2.45		2	8	DMSO	TRIM37	66	55.22	62.18	1.87		3	10	DMSO	TRIM37	66	100.21	118.76	2.39
1	10	DMSO	TRIM37	70	69.78	58.56	1.92		2	8	DMSO	TRIM37	70	59.08	60.66	2.43		3	10	DMSO	TRIM37	70	100.71	120.57	2.43
1	10	DMSO	TRIM37	74	73.01	56.49	2.2		2	8	DMSO	TRIM37	74	59.92	63.84	3.1		3	10	DMSO	TRIM37	74	100.8	123.85	2.34
1	10	DMSO	TRIM37	78	77	60.7	2.38		2	8	DMSO	TRIM37	78	60.03	62.34	2.32		3	10	DMSO	TRIM37	78	106.02	122.5	2.56
1	10	DMSO	TRIM37	82	77.49	64.38	2.3		2	8	DMSO	TRIM37	82	58.79	61.35	2.17		3	10	DMSO	TRIM37	82	108.93	119.75	2.65
1	10	DMSO	TRIM37	86	81.37	65.2	2.22		2	8	DMSO	TRIM37	86	61.38	61.26	2.24		3	10	DMSO	TRIM37	86	109.77	117.82	2.21
1	10	DMSO	TRIM37	90	83.06	58.04	2.21		2	8	DMSO	TRIM37	90	60.05	60.71	2.21		3	10	DMSO	TRIM37	90	113.13	119.08	2.05
1	10	DMSO	TRIM37	94	85.55	55.88	2.14		2	8	DMSO	TRIM37	94	62.5	61.41	2.29		3	10	DMSO	TRIM37	94	117.51	122.51	2.46
1	10	DMSO	TRIM37	98	88.44	62.84	2.32		2	8	DMSO	TRIM37	98	62.14	60.42	2.65		3	10	DMSO	TRIM37	98	112.75	132.89	2.28
1	1	500 nM	TRIM37	0	519.11	161.62	2.11		2	9	DMSO	TRIM37	0	24.41	31.49	2.12		3	11	DMSO	TRIM37	0	975.63	661.21	2.4
1	1	500 nM	TRIM37	4	492.65	166.23	2.16		2	9	DMSO	TRIM37	4	24.3	30.43	2.4		3	11	DMSO	TRIM37	4	973.02	670.49	2.64
1	1	500 nM	TRIM37	8	503.05	188.21	2.08		2	9	DMSO	TRIM37	8	25.42	28.33	2.52		3	11	DMSO	TRIM37	8	1000.05	639.12	2.95
1	1	500 nM	TRIM37	10	7.12	185.87	2.38		2	9	DMSO	TRIM37	10	3.1	27.69	2.3		3	11	DMSO	TRIM37	10	25.76	645.27	2.69
1	1	500 nM	TRIM37	14	14.06	188.85	2.36		2	9	DMSO	TRIM37	14	4.67	29.03	2.02		3	11	DMSO	TRIM37	14	71.26	642.87	3.04
1	1	500 nM	TRIM37	18	17.5	172.43	2.32		2	9	DMSO	TRIM37	18	5.61	29.45	2.61		3	11	DMSO	TRIM37	18	104.06	627.1	3.04
1	1	500 nM	TRIM37	22	17.58	183.23	2.52		2	9	DMSO	TRIM37	22	5.97	28.16	2.25		3	11	DMSO	TRIM37	22	134.53	591.07	2.18
1	1	500 nM	TRIM37	26	21.32	187.62	2.69		2	9	DMSO	TRIM37	26	7.21	27.82	2.41		3	11	DMSO	TRIM37	26	164.05	577.9	2.74
1	1	500 nM	TRIM37	30	23.6	191.16	2.35		2	9	DMSO	TRIM37	30	7.6	27.82	2.43		3	11	DMSO	TRIM37	30	189.13	590.2	2.8
1	1	500 nM	TRIM37	34	24.78	181.76	2.41		2	9	DMSO	TRIM37	34	8.12	28.18	1.93		3	11	DMSO	TRIM37	34	217.02	575.23	2.75
1	1	500 nM	TRIM37	38	27.18	160.54	2.1		2	9	DMSO	TRIM37	38	9.69	28.93	2.68		3	11	DMSO	TRIM37	38	233.68	581.6	2.77
1	1	500 nM	TRIM37	42	28.56	153.06	2.53		2	9	DMSO	TRIM37	42	9.8	29.15	2.55		3	11	DMSO	TRIM37	42	252.95	579.97	2.89
1	1	500 nM	TRIM37	46	29.1	136.89	1.85		2	9	DMSO	TRIM37	46	9.7	26.96	2		3	11	DMSO	TRIM37	46	269.61	556.61	2.88
1	1	500 nM	TRIM37	50	30.37	146.6	2.47		2	9	DMSO	TRIM37	50	9.76	27.6	2.2		3	11	DMSO	TRIM37	50	283.89	540.09	2.78
1	1	500 nM	TRIM37	54	31.3	163.09	2.22		2	9	DMSO	TRIM37	54	9.97	26.89	2.12		3	11	DMSO	TRIM37	54	296.38	509.3	2.55
1	1	500 nM	TRIM37	58	33.09	164.07	2.58		2	9	DMSO	TRIM37	58	11.58	28.81	2.55		3	11	DMSO	TRIM37	58	305.94	515.71	2.76
1	1	500 nM	TRIM37	62	34.21	155.85	2.8		2	9	DMSO	TRIM37	62	11.73	28.96	2.55		3	11	DMSO	TRIM37	62	304.18	521.59	2.7
1	1	500 nM	TRIM37	66	35.01	166.49	2.34		2	9	DMSO	TRIM37	66	10.69	28.61	2.09		3	11	DMSO	TRIM37	66	313.08	511.39	3.07
1	1	500 nM	TRIM37	70	34.88	142.28	2.01		2	9	DMSO	TRIM37	70	12.29	28.42	2.14		3	11	DMSO	TRIM37	70	319.07	519.53	2.65
1	1	500 nM	TRIM37	74	33.84	158.37	2.14		2	9	DMSO	TRIM37	74	12.93	29.42	2.38		3	11	DMSO	TRIM37	74	330.12	528.61	2.9
1	1	500 nM	TRIM37	78	34.86	157.21	2.17		2	9	DMSO	TRIM37	78	13.23	30.51	2.27		3	11	DMSO	TRIM37	78	317.75	532.02	2.51
1	1	500 nM	TRIM37	82	37.53	144.06	2.53		2	9	DMSO	TRIM37	82	13.96	30.06	2.51		3	11	DMSO	TRIM37	82	342.98	468.61	2.83
1	1	500 nM	TRIM37	86	32.94	120.61	1.98		2	9	DMSO	TRIM37	86	13.03	30.96	2.36		3	11	DMSO	TRIM37	86	358.78	469.42	2.58
1	1	500 nM	TRIM37	90	33.31	125.57	2.26		2	9	DMSO	TRIM37	90	14.01	31.75	2.45		3	11	DMSO	TRIM37	90	363.97	478.34	3.07
1	1	500 nM	TRIM37	94	33.31	125.73	2.21		2	9	DMSO	TRIM37	94	12.93	29.76	2.5		3	11	DMSO	TRIM37	94	366.11	500.54	2.82
1	1	500 nM	TRIM37	98	37.07	141.54	2.68		2	9	DMSO	TRIM37	98	14.61	28.38	2.22		3	11	DMSO	TRIM37	98	397.45	501.42	2.84
1	2	500 nM	TRIM37	0	52.12	24.08	2.42		2	10	DMSO	TRIM37	0	73.23	83.44	2.09		3	12	DMSO	TRIM37	0	401.61	237.59	2.44
1	2	500 nM	TRIM37	4	53.87	24.8	2.39		2	10	DMSO	TRIM37	4	75.26	78.93	2.49		3	12	DMSO	TRIM37	4	410.34	259.06	2.66
1	2	500 nM	TRIM37	8	51.98	23.77	2.28		2	10	DMSO	TRIM37	8	76	82.01	2.08		3	12	DMSO	TRIM37	8	416.12	260.59	2.34
1	2	500 nM	TRIM37	10	3.92	24.55	2.63		2	10	DMSO	TRIM37	10	4.23	74.98	2.55		3	12	DMSO	TRIM37	10	21.1	254.1	2.41
1	2	500 nM	TRIM37	14	6.14	24.54	2.44		2	10	DMSO	TRIM37	14	5.72	81.89	2.27		3	12	DMSO	TRIM37	14	50.29	244.18	2.33
1	2	500 nM	TRIM37	18	6.63	23.79	2.23		2	10	DMSO	TRIM37	18	7.66	80.28	2.34		3	12	DMSO	TRIM37	18	82.54	256.62	2.21
1	2	500 nM	TRIM37	22	7.81	23.49	2.46		2	10	DMSO	TRIM37	22	9.14	78.55	2.51		3	12	DMSO	TRIM37	22	98.99	260.67	2.34
1	2	500 nM	TRIM37	26	7.27	22.96	2.35		2	10	DMSO	TRIM37	26	8.68	81.17	2.16		3	12	DMSO	TRIM37	26	115.89	259.39	2.27
1	2	500 nM	TRIM37	30	8.01	24.26	2.3		2	10	DMSO	TRIM37	30	8.97	75.49	2.36		3	12	DMSO	TRIM37	30	129.56	265.68	2.1
1	2	500 nM	TRIM37	34	8.21	23.1	2.34		2	10	DMSO	TRIM37	34	10.1	78.73	2.18		3	12	DMSO	TRIM37	34	144.48	265.59	2.44
1	2	500 nM	TRIM37	38	9.07	23.12	2.27		2	10	DMSO	TRIM37	38	10.95	79.6	2.32		3	12	DMSO	TRIM37	38	155.65	258.99	2.08
1	2	500 nM	TRIM37	42	8.12	21.86	1.76		2	10	DMSO	TRIM37	42	12.14	78.12	2.49		3	12	DMSO	TRIM37	42	169.43	261.53	2.28
1	2	500 nM	TRIM37	46	9.71	23.58	2.5		2	10	DMSO	TRIM37	46	12.22	78.39	2.02		3	12	DMSO	TRIM37	46	173.44	279.63	2.22
1	2	500 nM	TRIM37	50	10.64	23.19	2.92		2	10	DMSO	TRIM37	50	13.48	79.9	2.51		3	12	DMSO	TRIM37	50	183.22	283.63	2
1	2	500 nM	TRIM37	54	10.2	23.12	2.43		2	10	DMSO	TRIM37	54	13.5	80.29	2.11		3	12	DMSO	TRIM37	54	191.28	280.95	2.15
1	2	500 nM	TRIM37	58	10.73	23.58	2.29		2	10	DMSO	TRIM37	58	13.29	80.81	2.37		3	12	DMSO	TRIM37	58	198.72	282.77	2.34
1	2	500 nM	TRIM37	62	11.07	24.02	2.29		2	10	DMSO	TRIM37	62	13.91	82.03	2.19		3	12	DMSO	TRIM37	62	204.06	279.22	2.49
1	2	500 nM	TRIM37	66	12.61	24.13	2.61		2	10	DMSO	TRIM37	66	14.66	83.39	2.33		3	12	DMSO	TRIM37	66	212.62	284.37	2.4
1	2	500 nM	TRIM37	70	11.95	23.14	2.35		2	10	DMSO	TRIM37	70	15.9	83.67	2.47		3	12	DMSO	TRIM37	70	214.97	277.52	2.26
1	2	500 nM	TRIM37	74	12.56	23.74	2.39		2	10	DMSO	TRIM37	74	15.2	80.56	2.33		3	12	DMSO	TRIM37	74	223.14	283.61	2.37
1	2	500 nM	TRIM37	78	12.25	20.78	2.12		2	10	DMSO	TRIM37	78	16.34	81.26	2.46		3	12	DMSO	TRIM37	78	224.48	277.52	2.38
1	2	500 nM	TRIM37	82	12.52	20.28	2.22		2	10	DMSO	TRIM37	82	16.22	83.11	2.38		3	12	DMSO	TRIM37	82	229.27	272.02	2.54
1	2	500 nM	TRIM37	86	12.88	21.82	2.47		2	10	DMSO	TRIM37	86	16.55	83.66	2.32		3	12	DMSO	TRIM37	86	234.18	274.93	2.41
1	2	500 nM	TRIM37	90	12.81	23.28	2.34		2	10	DMSO	TRIM37	90	15.85	85.09	2.38		3	12	DMSO	TRIM37	90	238.38	266.53	2.67
1	2	500 nM	TRIM37	94	13.62	22.64	2.23		2	10	DMSO	TRIM37	94	16.01	83.54	2.09		3	12	DMSO	TRIM37	94	242.54	271.05	2.22
1	2	500 nM	TRIM37	98	12.66	22.85	2.27		2	10	DMSO	TRIM37	98	16.96	83.29	2.49		3	12	DMSO	TRIM37	98	244.84	276.83	2.46
1	3	500 nM	TRIM37	0	98.44	34.98	2.03		2	11	DMSO	TRIM37	0	74.23	61.83	2.33		3	1	500 nM	CON	0	866.58	548.69	2.4
1	3	500 nM	TRIM37	4	97.77	35.63	2.74		2	11	DMSO	TRIM37	4	65.85	62.15	2.32		3	1	500 nM	CON	4	857.46	554.82	2.16
1	3	500 nM	TRIM37	8	99.94	35	2.32		2	11	DMSO	TRIM37	8	56.19	53.78	2.64		3	1	500 nM	CON	8	847.24	552.19	2.55
1	3	500 nM	TRIM37	10	3.57	32.08	2		2	11	DMSO	TRIM37	10	5.25	48.04	2.42		3	1	500 nM	CON	10	16.77	540.91	2.31
1	3	500 nM	TRIM37	14	5.5	33.06	2.1		2	11	DMSO	TRIM37	14	9.33	47.95	2.09		3	1	500 nM	CON	14	26.78	549.05	2.6
1	3	500 nM	TRIM37	18	7.04	33.29	2.22		2	11	DMSO	TRIM37	18	11.23	49.32	2.27		3	1	500 nM	CON	18	29.78	554.84	2.44
1	3	500 nM	TRIM37	22	8.33	34.69	2.86		2	11	DMSO	TRIM37	22	17.45	50.9	2.58		3	1	500 nM	CON	22	31.98	546.96	2.42
1	3	500 nM	TRIM37	26	8.86	33.2	2.18		2	11	DMSO	TRIM37	26	15.73	45.98	2.35		3	1	500 nM	CON	26	36.72	540.38	2.68
1	3	500 nM	TRIM37	30	8.99	33.28	1.88		2	11	DMSO	TRIM37	30	18.66	49.46	2.51		3	1	500 nM	CON	30	39.08	538.38	2.27
1	3	500 nM	TRIM37	34	9.98	35.03	2.24		2	11	DMSO	TRIM37	34	20.56	46.37	2.13		3	1	500 nM	CON	34	39.53	542.44	2.58
1	3	500 nM	TRIM37	38	10.92	35.1	2.4		2	11	DMSO	TRIM37	38	22.57	43.49	2.29		3	1	500 nM	CON	38	39.9	531.84	2.36
1	3	500 nM	TRIM37	42	11.11	33.79	2.38		2	11	DMSO	TRIM37	42	23.09	43.69	2.37		3	1	500 nM	CON	42	40.71	536.02	2.23
1	3	500 nM	TRIM37	46	12.08	33.32	2.36		2	11	DMSO	TRIM37	46	26.75	46.67	2.23		3	1	500 nM	CON	46	41.23	535.96	2.25
1	3	500 nM	TRIM37	50	12.81	33.19	2.56		2	11	DMSO	TRIM37	50	29.04	44.27	2.16		3	1	500 nM	CON	50	43.14	531.45	2.29
1	3	500 nM	TRIM37	54	12.96	32.68	2.32		2	11	DMSO	TRIM37	54	29.75	44.65	2.52		3	1	500 nM	CON	54	45.09	528.78	2.13
1	3	500 nM	TRIM37	58	14	31.08	2.38		2	11	DMSO	TRIM37	58	28.68	43.36	2.32		3	1	500 nM	CON	58	46.93	530.82	2.38
1	3	500 nM	TRIM37	62	14.62	31.06	2.28		2	11	DMSO	TRIM37	62	31.01	48.88	2.41		3	1	500 nM	CON	62	48.43	526.96	2.46
1	3	500 nM	TRIM37	66	14.37	33.23	2.24		2	11	DMSO	TRIM37	66	29.93	44.25	2.05		3	1	500 nM	CON	66	49.93	509.08	2.53
1	3	500 nM	TRIM37	70	15.37	34.44	2.36		2	11	DMSO	TRIM37	70	31.69	45.06	2.19		3	1	500 nM	CON	70	51.78	509.18	2.24
1	3	500 nM	TRIM37	74	16.23	33.58	2.94		2	11	DMSO	TRIM37	74	28.78	40.26	2.49		3	1	500 nM	CON	74	53.02	509.42	2.34
1	3	500 nM	TRIM37	78	16.35	32.64	2.66		2	11	DMSO	TRIM37	78	29.22	42.25	2.43		3	1	500 nM	CON	78	55.32	507.06	2.49
1	3	500 nM	TRIM37	82	16.57	33.7	2.24		2	11	DMSO	TRIM37	82	29.06	42.55	2.52		3	1	500 nM	CON	82	56.69	503.2	2.39
1	3	500 nM	TRIM37	86	17.07	33.06	2.73		2	11	DMSO	TRIM37	86	36.11	48.95	2.44		3	1	500 nM	CON	86	59.36	510.2	2.58
1	3	500 nM	TRIM37	90	17.32	31.61	2.08		2	11	DMSO	TRIM37	90	34.04	46.11	2.4		3	1	500 nM	CON	90	58.53	496.44	2.4
1	3	500 nM	TRIM37	94	18.4	31.86	2.08		2	11	DMSO	TRIM37	94	34.01	46.14	2.14		3	1	500 nM	CON	94	60.71	501.06	2.35
1	3	500 nM	TRIM37	98	19.02	32.22	2.06		2	11	DMSO	TRIM37	98	29.89	42.2	2.48		3	1	500 nM	CON	98	65.97	500.22	2.19
1	4	500 nM	TRIM37	0	88.13	54.13	2.51		2	12	DMSO	TRIM37	0	126.63	59.51	3.87		3	2	500 nM	CON	0	1444.42	358.43	2.44
1	4	500 nM	TRIM37	4	88.97	59.8	2.17		2	12	DMSO	TRIM37	4	127.32	53.56	3.66		3	2	500 nM	CON	4	1457.72	363.03	2.64
1	4	500 nM	TRIM37	8	89.42	60.52	2.38		2	12	DMSO	TRIM37	8	127.14	47.6	3.58		3	2	500 nM	CON	8	1448.58	363.61	2.61
1	4	500 nM	TRIM37	10	3.26	58.23	2.26		2	12	DMSO	TRIM37	10	6.09	37.49	3.37		3	2	500 nM	CON	10	33.89	362.01	2.43
1	4	500 nM	TRIM37	14	4.34	62.07	1.89		2	12	DMSO	TRIM37	14	14.43	42.83	3.74		3	2	500 nM	CON	14	42.36	362.76	2.81
1	4	500 nM	TRIM37	18	6.51	61.1	2.99		2	12	DMSO	TRIM37	18	18.43	44.98	3.35		3	2	500 nM	CON	18	46.15	357.78	3.14
1	4	500 nM	TRIM37	22	6.23	60.34	2.22		2	12	DMSO	TRIM37	22	23.65	48.76	3.82		3	2	500 nM	CON	22	48.95	354.64	2.66
1	4	500 nM	TRIM37	26	7.18	60.16	2.43		2	12	DMSO	TRIM37	26	26.74	35.88	3.25		3	2	500 nM	CON	26	51.46	355.24	2.49
1	4	500 nM	TRIM37	30	7.52	59.55	2.37		2	12	DMSO	TRIM37	30	29.77	37.91	3.73		3	2	500 nM	CON	30	53.92	350.56	2.85
1	4	500 nM	TRIM37	34	7.95	57.7	2.61		2	12	DMSO	TRIM37	34	35.16	39.73	4.1		3	2	500 nM	CON	34	54.17	349.29	2.94
1	4	500 nM	TRIM37	38	8.27	60.72	2.21		2	12	DMSO	TRIM37	38	38.94	37.4	3.6		3	2	500 nM	CON	38	56.15	351.62	2.82
1	4	500 nM	TRIM37	42	8.58	59.23	2.04		2	12	DMSO	TRIM37	42	42.23	39.66	3.57		3	2	500 nM	CON	42	56.68	342.63	2.72
1	4	500 nM	TRIM37	46	9.35	60.11	2.22		2	12	DMSO	TRIM37	46	46.56	41.89	3.68		3	2	500 nM	CON	46	53.34	343.28	2.96
1	4	500 nM	TRIM37	50	10.01	64.17	2.2		2	12	DMSO	TRIM37	50	48.24	40.16	3.76		3	2	500 nM	CON	50	52.07	341.79	2.66
1	4	500 nM	TRIM37	54	10.34	63.23	2.67		2	12	DMSO	TRIM37	54	51.54	40.8	3.47		3	2	500 nM	CON	54	52.37	343.91	2.81
1	4	500 nM	TRIM37	58	10.81	61.13	2.27		2	12	DMSO	TRIM37	58	53.44	43.06	3.68		3	2	500 nM	CON	58	46.14	341.88	2.84
1	4	500 nM	TRIM37	62	11.4	63.12	2.58		2	12	DMSO	TRIM37	62	50.91	39.8	3.92		3	2	500 nM	CON	62	46.79	332.57	2.27
1	4	500 nM	TRIM37	66	11.76	63.91	2.03		2	12	DMSO	TRIM37	66	55.6	39.27	3.62		3	2	500 nM	CON	66	50.74	329.51	2.75
1	4	500 nM	TRIM37	70	12.62	63.9	2.27		2	12	DMSO	TRIM37	70	56.73	39.19	3.95		3	2	500 nM	CON	70	54.39	327.02	2.89
1	4	500 nM	TRIM37	74	13.02	62.76	2.68		2	12	DMSO	TRIM37	74	59.16	40.77	3.74		3	2	500 nM	CON	74	51.97	326.32	2.58
1	4	500 nM	TRIM37	78	13.44	61.32	2.8		2	12	DMSO	TRIM37	78	59.88	41.86	3.4		3	2	500 nM	CON	78	55.64	324.55	2.74
1	4	500 nM	TRIM37	82	13.14	59.55	2.18		2	12	DMSO	TRIM37	82	66.78	42.8	3.75		3	2	500 nM	CON	82	58.89	322.24	3.07
1	4	500 nM	TRIM37	86	13.94	64.42	2.22		2	12	DMSO	TRIM37	86	73.93	42.44	3.73		3	2	500 nM	CON	86	57.41	319.67	2.56
1	4	500 nM	TRIM37	90	14.45	62.26	2.53		2	12	DMSO	TRIM37	90	75.38	40.41	3.53		3	2	500 nM	CON	90	59.39	322.07	2.71
1	4	500 nM	TRIM37	94	15.01	62.5	2.41		2	12	DMSO	TRIM37	94	77.46	45.07	3.28		3	2	500 nM	CON	94	68.2	323.57	2.99
1	4	500 nM	TRIM37	98	15	61.7	2.74		2	12	DMSO	TRIM37	98	80.16	47.5	4.12		3	2	500 nM	CON	98	70.81	311.54	2.69
1	5	500 nM	TRIM37	0	412.37	164.12	2.26		2	1	500 nM	TRIM37	0	910.97	1978.24	3.39		3	3	500 nM	CON	0	718.88	285.76	3.12
1	5	500 nM	TRIM37	4	412.91	161.87	2.52		2	1	500 nM	TRIM37	4	924.37	2003.88	3.25		3	3	500 nM	CON	4	728.57	283.04	3.27
1	5	500 nM	TRIM37	8	407.22	160.42	2.58		2	1	500 nM	TRIM37	8	943.5	2075.66	3.65		3	3	500 nM	CON	8	715.4	294.07	3.08
1	5	500 nM	TRIM37	10	4.58	153.79	2.54		2	1	500 nM	TRIM37	10	67.08	2001.71	3.29		3	3	500 nM	CON	10	11.38	282.67	2.86
1	5	500 nM	TRIM37	14	8.01	151.02	2.37		2	1	500 nM	TRIM37	14	83.55	1908.06	3.16		3	3	500 nM	CON	14	21.86	308.01	3.29
1	5	500 nM	TRIM37	18	11.42	137.44	2.46		2	1	500 nM	TRIM37	18	83.96	1898.14	3.24		3	3	500 nM	CON	18	25.95	273	3.03
1	5	500 nM	TRIM37	22	13.97	164.11	2.38		2	1	500 nM	TRIM37	22	96.35	1972.76	2.98		3	3	500 nM	CON	22	29.48	271.85	2.71
1	5	500 nM	TRIM37	26	14.75	138.3	1.98		2	1	500 nM	TRIM37	26	101.32	1939.17	3.16		3	3	500 nM	CON	26	32.5	266.74	3.2
1	5	500 nM	TRIM37	30	17.41	165.95	2.53		2	1	500 nM	TRIM37	30	106.57	1941.11	2.82		3	3	500 nM	CON	30	34.27	279.09	2.98
1	5	500 nM	TRIM37	34	18.97	175.17	2.71		2	1	500 nM	TRIM37	34	116.13	1952.23	3.11		3	3	500 nM	CON	34	34.96	284.98	3.27
1	5	500 nM	TRIM37	38	20.07	170.5	1.95		2	1	500 nM	TRIM37	38	122.44	1842.17	2.81		3	3	500 nM	CON	38	35.75	286.3	3.01
1	5	500 nM	TRIM37	42	23.24	152.37	2.53		2	1	500 nM	TRIM37	42	137.13	1881.9	2.82		3	3	500 nM	CON	42	40.13	277.84	3.17
1	5	500 nM	TRIM37	46	24.99	145.88	2.08		2	1	500 nM	TRIM37	46	132.31	1825.77	3.05		3	3	500 nM	CON	46	39.91	284.09	3.31
1	5	500 nM	TRIM37	50	26.42	194.3	2.37		2	1	500 nM	TRIM37	50	120.49	1918.21	2.81		3	3	500 nM	CON	50	38.7	294.42	3
1	5	500 nM	TRIM37	54	27.15	177.41	2.01		2	1	500 nM	TRIM37	54	114.98	1864.28	3.34		3	3	500 nM	CON	54	42.05	265.11	3.51
1	5	500 nM	TRIM37	58	28.2	151.64	2.44		2	1	500 nM	TRIM37	58	115.22	1825.1	2.93		3	3	500 nM	CON	58	44.96	269.06	3.08
1	5	500 nM	TRIM37	62	29.43	137.04	2.28		2	1	500 nM	TRIM37	62	123.39	1925.1	2.67		3	3	500 nM	CON	62	46.59	272.49	3.39
1	5	500 nM	TRIM37	66	30.7	136.02	1.77		2	1	500 nM	TRIM37	66	117.38	1843.31	2.61		3	3	500 nM	CON	66	45.72	269.73	3.4
1	5	500 nM	TRIM37	70	32.42	159.01	2.12		2	1	500 nM	TRIM37	70	120.98	1893.53	2.98		3	3	500 nM	CON	70	47.41	266.04	3.02
1	5	500 nM	TRIM37	74	33.42	143.56	2.44		2	1	500 nM	TRIM37	74	121.27	1807.54	2.52		3	3	500 nM	CON	74	44.5	255.76	2.77
1	5	500 nM	TRIM37	78	34.48	143.87	2.22		2	1	500 nM	TRIM37	78	123.43	1843.67	3.04		3	3	500 nM	CON	78	44.51	268.68	2.98
1	5	500 nM	TRIM37	82	35.72	142.14	2.36		2	1	500 nM	TRIM37	82	129.95	1801.78	2.48		3	3	500 nM	CON	82	46.59	260.61	2.98
1	5	500 nM	TRIM37	86	37.38	140.91	2.29		2	1	500 nM	TRIM37	86	125.48	1813.47	3.23		3	3	500 nM	CON	86	47.62	255.64	3.1
1	5	500 nM	TRIM37	90	38.44	135.46	2.48		2	1	500 nM	TRIM37	90	129.03	1795.97	2.71		3	3	500 nM	CON	90	48.17	250.73	3.04
1	5	500 nM	TRIM37	94	40.4	135.62	2.4		2	1	500 nM	TRIM37	94	137.14	1847.38	2.87		3	3	500 nM	CON	94	48.79	253.43	2.81
1	5	500 nM	TRIM37	98	41.28	132.44	2.36		2	1	500 nM	TRIM37	98	144.16	1900.23	3.16		3	3	500 nM	CON	98	48.14	247.14	2.94
1	6	500 nM	TRIM37	0	341.81	73.5	2.4		2	2	500 nM	TRIM37	0	326.14	125.17	2.66		3	4	500 nM	CON	0	685.33	39.59	2.47
1	6	500 nM	TRIM37	4	347.37	72.01	2.38		2	2	500 nM	TRIM37	4	332.2	126.99	2.28		3	4	500 nM	CON	4	706.42	38.75	2.37
1	6	500 nM	TRIM37	8	349.77	75.35	2.33		2	2	500 nM	TRIM37	8	322.88	128.66	2.32		3	4	500 nM	CON	8	707.51	40.01	2.35
1	6	500 nM	TRIM37	10	3.44	70.23	2.38		2	2	500 nM	TRIM37	10	6.94	113.04	2.46		3	4	500 nM	CON	10	25.46	37.15	2.42
1	6	500 nM	TRIM37	14	4.52	74.52	2.17		2	2	500 nM	TRIM37	14	9.09	124.57	2		3	4	500 nM	CON	14	47.35	37.01	2.65
1	6	500 nM	TRIM37	18	5.52	75.79	2.36		2	2	500 nM	TRIM37	18	11.6	107.68	2.2		3	4	500 nM	CON	18	54.51	36.67	2.31
1	6	500 nM	TRIM37	22	6.54	75.75	2.4		2	2	500 nM	TRIM37	22	12.8	120.31	2.44		3	4	500 nM	CON	22	56.13	35.54	2.58
1	6	500 nM	TRIM37	26	7.33	73.03	2.14		2	2	500 nM	TRIM37	26	11.85	118.31	2.21		3	4	500 nM	CON	26	62.59	38.76	2.93
1	6	500 nM	TRIM37	30	8.43	72.08	2.53		2	2	500 nM	TRIM37	30	11.36	99.18	2.37		3	4	500 nM	CON	30	65.49	35.72	3.03
1	6	500 nM	TRIM37	34	8.93	71.84	2.25		2	2	500 nM	TRIM37	34	11.52	108.45	2.2		3	4	500 nM	CON	34	65.6	30.22	2.12
1	6	500 nM	TRIM37	38	9.54	70.5	2.02		2	2	500 nM	TRIM37	38	12.31	106.82	2.39		3	4	500 nM	CON	38	63.82	33.3	2.62
1	6	500 nM	TRIM37	42	10.26	71.49	2.43		2	2	500 nM	TRIM37	42	11.61	96.57	2.58		3	4	500 nM	CON	42	66.06	34.01	2.58
1	6	500 nM	TRIM37	46	11.18	67.38	2.14		2	2	500 nM	TRIM37	46	11.26	100.39	2.33		3	4	500 nM	CON	46	68.78	37.01	2.36
1	6	500 nM	TRIM37	50	12.26	70.09	2.26		2	2	500 nM	TRIM37	50	11.86	93.69	2.26		3	4	500 nM	CON	50	70.91	37.68	2.4
1	6	500 nM	TRIM37	54	11.3	69.8	1.84		2	2	500 nM	TRIM37	54	12.04	98.68	2.25		3	4	500 nM	CON	54	69.25	36.99	2.17
1	6	500 nM	TRIM37	58	12.7	73.05	2.53		2	2	500 nM	TRIM37	58	15.43	104.69	2.36		3	4	500 nM	CON	58	70.06	37.15	2.61
1	6	500 nM	TRIM37	62	13.08	69.33	2.32		2	2	500 nM	TRIM37	62	17.12	86.64	2.39		3	4	500 nM	CON	62	70.34	36.46	2.34
1	6	500 nM	TRIM37	66	13.55	68.41	2.38		2	2	500 nM	TRIM37	66	17.44	102.68	2.16		3	4	500 nM	CON	66	72.06	36.71	2.59
1	6	500 nM	TRIM37	70	13.91	63.91	2.17		2	2	500 nM	TRIM37	70	23.55	109.36	2.59		3	4	500 nM	CON	70	71.35	34.84	2.39
1	6	500 nM	TRIM37	74	14.06	67	2.23		2	2	500 nM	TRIM37	74	21.86	104.64	2.35		3	4	500 nM	CON	74	72.3	33.56	2.24
1	6	500 nM	TRIM37	78	13.8	71.29	2.3		2	2	500 nM	TRIM37	78	22.79	104.87	2.31		3	4	500 nM	CON	78	76.36	34.45	2.42
1	6	500 nM	TRIM37	82	14.51	71.45	2.48		2	2	500 nM	TRIM37	82	20.87	107.45	2.52		3	4	500 nM	CON	82	71.82	34.61	2.46
1	6	500 nM	TRIM37	86	14.05	71.87	2.04		2	2	500 nM	TRIM37	86	20.45	100.47	2.22		3	4	500 nM	CON	86	76.6	35.41	2.11
1	6	500 nM	TRIM37	90	14.84	72.86	2.14		2	2	500 nM	TRIM37	90	16.42	81.48	2.31		3	4	500 nM	CON	90	77.08	36.03	2.24
1	6	500 nM	TRIM37	94	14.86	72.41	2.22		2	2	500 nM	TRIM37	94	16.49	97.99	2.29		3	4	500 nM	CON	94	76.34	34.92	2.35
1	6	500 nM	TRIM37	98	15.85	71.88	2.31		2	2	500 nM	TRIM37	98	15.7	87.78	1.99		3	4	500 nM	CON	98	77.88	35.33	2.24
1	7	500 nM	TRIM37	0	141.41	23.57	2.52		2	3	500 nM	TRIM37	0	437.46	1183.6	2		3	5	500 nM	CON	0	687.53	268.46	21.62
1	7	500 nM	TRIM37	4	136.75	23.87	2.16		2	3	500 nM	TRIM37	4	413.68	1144.45	2.26		3	5	500 nM	CON	4	684.91	267.23	21.16
1	7	500 nM	TRIM37	8	134.24	22.23	2.35		2	3	500 nM	TRIM37	8	406.32	1125.64	2.57		3	5	500 nM	CON	8	673.66	244.63	21.39
1	7	500 nM	TRIM37	10	3.99	23.06	2.13		2	3	500 nM	TRIM37	10	7.66	1114.46	2.12		3	5	500 nM	CON	10	28.87	255.87	20.83
1	7	500 nM	TRIM37	14	7.23	22.92	2.11		2	3	500 nM	TRIM37	14	13.88	1102.12	2.3		3	5	500 nM	CON	14	41.36	251.14	20.47
1	7	500 nM	TRIM37	18	8.92	23.62	2.33		2	3	500 nM	TRIM37	18	17.31	1108.1	2.26		3	5	500 nM	CON	18	44.65	245.25	20.59
1	7	500 nM	TRIM37	22	10.63	23.36	2.3		2	3	500 nM	TRIM37	22	19.37	1095.13	2.12		3	5	500 nM	CON	22	48.91	240.36	20.38
1	7	500 nM	TRIM37	26	11.87	23.44	2.53		2	3	500 nM	TRIM37	26	21.44	1097.26	2.49		3	5	500 nM	CON	26	52.42	249.07	20.16
1	7	500 nM	TRIM37	30	11.83	21.76	2.13		2	3	500 nM	TRIM37	30	24.19	1106.54	2.45		3	5	500 nM	CON	30	55.31	248.35	20.69
1	7	500 nM	TRIM37	34	13.44	23.19	2.45		2	3	500 nM	TRIM37	34	25.49	1167.08	2.2		3	5	500 nM	CON	34	57.48	239.8	20.64
1	7	500 nM	TRIM37	38	14.39	22.38	2.36		2	3	500 nM	TRIM37	38	26.91	1139.58	2.28		3	5	500 nM	CON	38	59.67	241.36	20.19
1	7	500 nM	TRIM37	42	13.77	22.52	2.29		2	3	500 nM	TRIM37	42	26.99	1068.67	2.45		3	5	500 nM	CON	42	62.27	237.93	20.26
1	7	500 nM	TRIM37	46	14.64	21.78	2.26		2	3	500 nM	TRIM37	46	28.07	1091.61	2.23		3	5	500 nM	CON	46	61.14	238.79	19.65
1	7	500 nM	TRIM37	50	15.17	22.09	2.12		2	3	500 nM	TRIM37	50	30.26	1136.03	2.18		3	5	500 nM	CON	50	62.02	257.21	20.6
1	7	500 nM	TRIM37	54	15.99	22.43	2.3		2	3	500 nM	TRIM37	54	32.11	1140.57	2.38		3	5	500 nM	CON	54	62.98	247.32	20.15
1	7	500 nM	TRIM37	58	15.49	22.59	2.35		2	3	500 nM	TRIM37	58	31.99	1055.71	2.18		3	5	500 nM	CON	58	64.65	270.41	20.72
1	7	500 nM	TRIM37	62	12.31	21.48	2.38		2	3	500 nM	TRIM37	62	34.62	1139.58	2.3		3	5	500 nM	CON	62	66.98	268.82	19.48
1	7	500 nM	TRIM37	66	12.23	21.66	2.25		2	3	500 nM	TRIM37	66	34.97	1067.17	2.27		3	5	500 nM	CON	66	69.53	268.09	19.59
1	7	500 nM	TRIM37	70	12.38	22.64	2.27		2	3	500 nM	TRIM37	70	36.94	1095.99	2.29		3	5	500 nM	CON	70	71.23	277.6	20.09
1	7	500 nM	TRIM37	74	12.2	20.91	2.17		2	3	500 nM	TRIM37	74	37.04	1028.34	2.16		3	5	500 nM	CON	74	70.63	247.4	19.75
1	7	500 nM	TRIM37	78	12.45	21.29	2.62		2	3	500 nM	TRIM37	78	38.42	1056.7	2.78		3	5	500 nM	CON	78	70.15	254.36	19.26
1	7	500 nM	TRIM37	82	10.85	19.84	2.63		2	3	500 nM	TRIM37	82	38.36	1050.58	2.16		3	5	500 nM	CON	82	72.62	250.47	20.51
1	7	500 nM	TRIM37	86	8.5	20.88	2.15		2	3	500 nM	TRIM37	86	39.95	1114.56	2.5		3	5	500 nM	CON	86	75.25	235.51	19.87
1	7	500 nM	TRIM37	90	10.49	20.13	2.66		2	3	500 nM	TRIM37	90	39.31	1052.15	2.19		3	5	500 nM	CON	90	76.01	243.19	20.17
1	7	500 nM	TRIM37	94	12.93	18.01	2.3		2	3	500 nM	TRIM37	94	39.56	968.43	2.4		3	5	500 nM	CON	94	74.55	234.97	19.45
1	7	500 nM	TRIM37	98	22.89	20.36	2.42		2	3	500 nM	TRIM37	98	41.25	1021.11	2.5		3	5	500 nM	CON	98	74.62	236.13	19.1
1	8	500 nM	TRIM37	0	359.46	341.64	2.52		2	4	500 nM	TRIM37	0	104.62	19.86	2.84		3	6	500 nM	CON	0	413.66	91.48	2.57
1	8	500 nM	TRIM37	4	360.74	330.09	2.43		2	4	500 nM	TRIM37	4	106.48	19.63	2.3		3	6	500 nM	CON	4	422.42	86.44	2.72
1	8	500 nM	TRIM37	8	364.44	348.83	1.84		2	4	500 nM	TRIM37	8	108.04	19.16	2.59		3	6	500 nM	CON	8	416.33	92.36	2.14
1	8	500 nM	TRIM37	10	4.45	309.42	1.97		2	4	500 nM	TRIM37	10	5.88	19.36	2.54		3	6	500 nM	CON	10	6.95	86.42	2.43
1	8	500 nM	TRIM37	14	9.04	323.05	2.72		2	4	500 nM	TRIM37	14	9.71	18.08	2.19		3	6	500 nM	CON	14	9.8	88.25	2.5
1	8	500 nM	TRIM37	18	10.64	332.84	2.5		2	4	500 nM	TRIM37	18	12.38	18.21	2.47		3	6	500 nM	CON	18	10.45	94.55	2.63
1	8	500 nM	TRIM37	22	13.1	284.94	2.8		2	4	500 nM	TRIM37	22	12.11	17.97	2.1		3	6	500 nM	CON	22	11	92.98	2.46
1	8	500 nM	TRIM37	26	13.66	258.21	2.22		2	4	500 nM	TRIM37	26	13.57	18.14	2.39		3	6	500 nM	CON	26	14.04	92.56	2.14
1	8	500 nM	TRIM37	30	15.63	255.36	2.71		2	4	500 nM	TRIM37	30	14.32	18.53	2.55		3	6	500 nM	CON	30	16.83	89.52	2.58
1	8	500 nM	TRIM37	34	15.83	266.19	2.25		2	4	500 nM	TRIM37	34	14.53	18.61	2.08		3	6	500 nM	CON	34	17.26	92.25	2.31
1	8	500 nM	TRIM37	38	18.16	271.57	2.56		2	4	500 nM	TRIM37	38	14.74	19	2.35		3	6	500 nM	CON	38	17.98	94.99	2.7
1	8	500 nM	TRIM37	42	18.05	272.5	2.02		2	4	500 nM	TRIM37	42	15.78	18.82	2.64		3	6	500 nM	CON	42	17.28	90.58	2.59
1	8	500 nM	TRIM37	46	19.57	268.14	2.25		2	4	500 nM	TRIM37	46	17.24	19.15	2.74		3	6	500 nM	CON	46	16.93	85.01	2.26
1	8	500 nM	TRIM37	50	20.72	324.68	2.46		2	4	500 nM	TRIM37	50	17.61	18.27	2.64		3	6	500 nM	CON	50	19.47	84.92	2.65
1	8	500 nM	TRIM37	54	21.01	359.14	1.97		2	4	500 nM	TRIM37	54	17.45	18.14	2.4		3	6	500 nM	CON	54	17.29	91.24	2.3
1	8	500 nM	TRIM37	58	22.91	334.52	2.28		2	4	500 nM	TRIM37	58	18.11	19.25	2.55		3	6	500 nM	CON	58	16.29	86.16	2
1	8	500 nM	TRIM37	62	22.37	318.45	1.93		2	4	500 nM	TRIM37	62	18.03	18.26	2.64		3	6	500 nM	CON	62	19.03	88.63	2.41
1	8	500 nM	TRIM37	66	24.2	318.74	2.48		2	4	500 nM	TRIM37	66	18.67	19.06	2.54		3	6	500 nM	CON	66	22.57	93.13	2.74
1	8	500 nM	TRIM37	70	24.95	274.61	2.32		2	4	500 nM	TRIM37	70	18.02	17.79	2.22		3	6	500 nM	CON	70	19.07	89.24	2.13
1	8	500 nM	TRIM37	74	25.73	281.59	2.08		2	4	500 nM	TRIM37	74	18.91	18.31	2.53		3	6	500 nM	CON	74	17.73	86.22	2.14
1	8	500 nM	TRIM37	78	26.73	275.58	2.26		2	4	500 nM	TRIM37	78	19.99	20.02	2.83		3	6	500 nM	CON	78	21.01	86.7	2.25
1	8	500 nM	TRIM37	82	27.85	277.59	2.24		2	4	500 nM	TRIM37	82	19.99	17.94	2.6		3	6	500 nM	CON	82	17.7	84.95	2.66
1	8	500 nM	TRIM37	86	26.63	269.19	1.91		2	4	500 nM	TRIM37	86	19.86	18.85	2.62		3	6	500 nM	CON	86	17.78	80.25	2.31
1	8	500 nM	TRIM37	90	28.95	274.48	2.59		2	4	500 nM	TRIM37	90	20.2	18.64	2.61		3	6	500 nM	CON	90	21.15	86.61	2.48
1	8	500 nM	TRIM37	94	29.73	287.91	2.58		2	4	500 nM	TRIM37	94	20.5	18.27	2.6		3	6	500 nM	CON	94	19.61	92.22	2.2
1	8	500 nM	TRIM37	98	29.66	282.81	1.87		2	4	500 nM	TRIM37	98	21.66	17.45	2.86		3	6	500 nM	CON	98	20.41	78.55	2.54
1	9	500 nM	TRIM37	0	246.88	49.32	2.64		2	5	500 nM	TRIM37	0	291.55	158.7	2.43		3	7	500 nM	CON	0	2815.96	910.36	2.38
1	9	500 nM	TRIM37	4	263.95	49.99	2.29		2	5	500 nM	TRIM37	4	302.7	168.72	2.68		3	7	500 nM	CON	4	2767.41	912.21	2.56
1	9	500 nM	TRIM37	8	258.68	51.09	1.99		2	5	500 nM	TRIM37	8	282.34	162.99	2.61		3	7	500 nM	CON	8	2736.49	913.04	2.22
1	9	500 nM	TRIM37	10	4.69	48.74	2.15		2	5	500 nM	TRIM37	10	19.94	155.48	2.19		3	7	500 nM	CON	10	97.96	901.48	2.33
1	9	500 nM	TRIM37	14	8.01	50.36	1.95		2	5	500 nM	TRIM37	14	31.85	155.73	2.35		3	7	500 nM	CON	14	124.96	911.9	2.44
1	9	500 nM	TRIM37	18	10.88	53.56	2.1		2	5	500 nM	TRIM37	18	34.53	160.86	2.45		3	7	500 nM	CON	18	128.19	912.1	2.27
1	9	500 nM	TRIM37	22	12.64	56.26	2.03		2	5	500 nM	TRIM37	22	36.77	163.93	2.65		3	7	500 nM	CON	22	130.46	907.82	2.38
1	9	500 nM	TRIM37	26	14.67	63.99	2.37		2	5	500 nM	TRIM37	26	33.82	155.31	2.3		3	7	500 nM	CON	26	130	910.27	2.3
1	9	500 nM	TRIM37	30	14.93	57.73	2.27		2	5	500 nM	TRIM37	30	33.99	158.46	2.46		3	7	500 nM	CON	30	129.61	902.72	2.34
1	9	500 nM	TRIM37	34	16.26	59.13	2.08		2	5	500 nM	TRIM37	34	34.9	159.67	2.71		3	7	500 nM	CON	34	128.39	901.32	2.44
1	9	500 nM	TRIM37	38	16.67	55.06	2.31		2	5	500 nM	TRIM37	38	33.29	151.64	2.4		3	7	500 nM	CON	38	129.21	896.72	2.55
1	9	500 nM	TRIM37	42	18.4	60.53	2.19		2	5	500 nM	TRIM37	42	33.17	150.26	2.19		3	7	500 nM	CON	42	128.51	898.51	2.56
1	9	500 nM	TRIM37	46	19.54	67.58	2.4		2	5	500 nM	TRIM37	46	34.94	158.12	2.47		3	7	500 nM	CON	46	123.92	895.37	2.92
1	9	500 nM	TRIM37	50	19.93	58.83	2.34		2	5	500 nM	TRIM37	50	35.6	156.38	2.71		3	7	500 nM	CON	50	120.71	884.01	2.33
1	9	500 nM	TRIM37	54	20.3	55.87	2.18		2	5	500 nM	TRIM37	54	36.4	155.39	2.55		3	7	500 nM	CON	54	120.88	893.91	2.52
1	9	500 nM	TRIM37	58	21.33	59.49	2.46		2	5	500 nM	TRIM37	58	35.89	154.45	2.55		3	7	500 nM	CON	58	120.56	886.53	2.29
1	9	500 nM	TRIM37	62	21.57	59.62	2.06		2	5	500 nM	TRIM37	62	37.16	151.41	2.31		3	7	500 nM	CON	62	121.01	878.14	2.66
1	9	500 nM	TRIM37	66	22.3	62	2.47		2	5	500 nM	TRIM37	66	36.69	148.41	2.16		3	7	500 nM	CON	66	117.9	890.49	2.49
1	9	500 nM	TRIM37	70	22.85	61.73	2.34		2	5	500 nM	TRIM37	70	35.5	157.95	2.17		3	7	500 nM	CON	70	119.49	873.65	2.26
1	9	500 nM	TRIM37	74	24.14	64.69	2.07		2	5	500 nM	TRIM37	74	37.42	154.28	2.4		3	7	500 nM	CON	74	120.67	867.57	2.44
1	9	500 nM	TRIM37	78	24.45	70.05	2.41		2	5	500 nM	TRIM37	78	38.22	155.96	2.08		3	7	500 nM	CON	78	119.11	872.09	2.36
1	9	500 nM	TRIM37	82	25.17	61.18	2.37		2	5	500 nM	TRIM37	82	39.55	159.99	2.42		3	7	500 nM	CON	82	123.61	868.13	2.34
1	9	500 nM	TRIM37	86	24.94	56.44	2.18		2	5	500 nM	TRIM37	86	40.33	156.26	2.44		3	7	500 nM	CON	86	121.67	870.22	2.26
1	9	500 nM	TRIM37	90	26.08	58.93	2.23		2	5	500 nM	TRIM37	90	39.41	152.96	2.48		3	7	500 nM	CON	90	118.95	860.75	2.26
1	9	500 nM	TRIM37	94	28.08	59.83	2.41		2	5	500 nM	TRIM37	94	37.51	147.62	2.55		3	7	500 nM	CON	94	119.33	855.61	2.49
1	9	500 nM	TRIM37	98	26.97	66.94	2.18		2	5	500 nM	TRIM37	98	39.96	155.26	2.4		3	7	500 nM	CON	98	121.15	863.53	2.39
1	10	500 nM	TRIM37	0	133.91	30.64	1.99		2	6	500 nM	TRIM37	0	751.33	403.01	2.35		3	8	500 nM	CON	0	1512.38	2216.11	2.44
1	10	500 nM	TRIM37	4	134.67	32.08	2.31		2	6	500 nM	TRIM37	4	715.62	377.41	2.19		3	8	500 nM	CON	4	1504.82	2187.41	2.14
1	10	500 nM	TRIM37	8	135.55	33.68	2.46		2	6	500 nM	TRIM37	8	757.8	398.62	2.52		3	8	500 nM	CON	8	1570.48	2254.89	2.73
1	10	500 nM	TRIM37	10	2.97	29.01	2.16		2	6	500 nM	TRIM37	10	31.01	394.28	2.18		3	8	500 nM	CON	10	61.99	2196.07	2.04
1	10	500 nM	TRIM37	14	3.54	30.62	2.39		2	6	500 nM	TRIM37	14	41.13	425.02	2.28		3	8	500 nM	CON	14	69.79	2196.7	2.13
1	10	500 nM	TRIM37	18	3.12	29.32	2.03		2	6	500 nM	TRIM37	18	42.47	395.32	2.26		3	8	500 nM	CON	18	79.76	2205.21	2.57
1	10	500 nM	TRIM37	22	3.62	29.28	2.56		2	6	500 nM	TRIM37	22	46.14	410.53	2.32		3	8	500 nM	CON	22	79.88	2184.05	2.22
1	10	500 nM	TRIM37	26	3.89	28.06	2.53		2	6	500 nM	TRIM37	26	45.94	384.06	2.39		3	8	500 nM	CON	26	85.09	2191.74	2.5
1	10	500 nM	TRIM37	30	3.98	26.32	2.52		2	6	500 nM	TRIM37	30	50.55	408.58	2.51		3	8	500 nM	CON	30	78.45	2149.77	2.67
1	10	500 nM	TRIM37	34	3.88	23.51	2.31		2	6	500 nM	TRIM37	34	50.98	402.47	2.27		3	8	500 nM	CON	34	80.31	2131.83	2.51
1	10	500 nM	TRIM37	38	3.87	25.46	2.44		2	6	500 nM	TRIM37	38	54.04	415.94	2.29		3	8	500 nM	CON	38	84.26	2144.96	2.4
1	10	500 nM	TRIM37	42	3.56	24.16	2.29		2	6	500 nM	TRIM37	42	53.37	395.15	2.22		3	8	500 nM	CON	42	80.09	2087.39	2.26
1	10	500 nM	TRIM37	46	3.92	24.52	2.19		2	6	500 nM	TRIM37	46	56.83	412.09	2.29		3	8	500 nM	CON	46	76.92	2053.92	2.24
1	10	500 nM	TRIM37	50	3.45	22.38	2.02		2	6	500 nM	TRIM37	50	56.22	368.11	2.3		3	8	500 nM	CON	50	81.09	2068.05	2.6
1	10	500 nM	TRIM37	54	3.92	22.48	2.3		2	6	500 nM	TRIM37	54	56.58	385.97	2.27		3	8	500 nM	CON	54	84.01	2072.97	2.29
1	10	500 nM	TRIM37	58	3.49	24.15	2.53		2	6	500 nM	TRIM37	58	60.62	372.04	2.44		3	8	500 nM	CON	58	78.8	2012.2	2.48
1	10	500 nM	TRIM37	62	3.59	22.99	2.22		2	6	500 nM	TRIM37	62	59.18	386.12	2.2		3	8	500 nM	CON	62	80.15	2029.48	2.27
1	10	500 nM	TRIM37	66	3.92	26.79	2.22		2	6	500 nM	TRIM37	66	63.55	373.56	2.09		3	8	500 nM	CON	66	79.94	1999.68	2.22
1	10	500 nM	TRIM37	70	3.7	22.08	2.38		2	6	500 nM	TRIM37	70	64.22	387.9	2.56		3	8	500 nM	CON	70	83.43	2008.12	2.47
1	10	500 nM	TRIM37	74	3.91	25.4	2.54		2	6	500 nM	TRIM37	74	69.09	404.49	2.15		3	8	500 nM	CON	74	82.85	1986.22	2.44
1	10	500 nM	TRIM37	78	3.51	22.52	2.25		2	6	500 nM	TRIM37	78	67.34	374.7	1.88		3	8	500 nM	CON	78	83.46	1974.6	2.49
1	10	500 nM	TRIM37	82	3.81	23.8	2.36		2	6	500 nM	TRIM37	82	72.63	378.05	2.37		3	8	500 nM	CON	82	83.4	1969.13	2.41
1	10	500 nM	TRIM37	86	3.79	21.12	2.39		2	6	500 nM	TRIM37	86	73.73	403.64	2.4		3	8	500 nM	CON	86	83.52	1979.4	2.16
1	10	500 nM	TRIM37	90	3.7	23.66	2.41		2	6	500 nM	TRIM37	90	71.86	390.91	2.36		3	8	500 nM	CON	90	86.14	1989.13	2.22
1	10	500 nM	TRIM37	94	3.41	23.01	2.15		2	6	500 nM	TRIM37	94	71.64	420.27	2.49		3	8	500 nM	CON	94	86.04	1969.19	2.47
1	10	500 nM	TRIM37	98	3.48	23.39	1.96		2	6	500 nM	TRIM37	98	70.67	380.73	2.11		3	8	500 nM	CON	98	88.69	1984.25	2.58
1	11	500 nM	TRIM37	0	640.66	30.31	2.34		2	7	500 nM	TRIM37	0	1514.74	1008.82	2.46		3	9	500 nM	CON	0	596.11	145.17	2.51
1	11	500 nM	TRIM37	4	630.64	30.11	2.12		2	7	500 nM	TRIM37	4	1521.63	1017.06	2.33		3	9	500 nM	CON	4	606.99	147.26	2.39
1	11	500 nM	TRIM37	8	624.78	28.51	2.41		2	7	500 nM	TRIM37	8	1482.15	975.8	2.79		3	9	500 nM	CON	8	589.81	152.57	2.51
1	11	500 nM	TRIM37	10	4.82	27.82	2.32		2	7	500 nM	TRIM37	10	24.23	979.59	2.18		3	9	500 nM	CON	10	15.67	161.07	1.96
1	11	500 nM	TRIM37	14	8.6	28.02	2.24		2	7	500 nM	TRIM37	14	34.45	988.2	2.56		3	9	500 nM	CON	14	28.52	157.01	2.38
1	11	500 nM	TRIM37	18	11.57	30.24	2.33		2	7	500 nM	TRIM37	18	37.68	991.81	2.16		3	9	500 nM	CON	18	36.71	149.3	2.43
1	11	500 nM	TRIM37	22	13.82	29.14	2.32		2	7	500 nM	TRIM37	22	41.19	1043.74	2.38		3	9	500 nM	CON	22	36.96	152.9	2.43
1	11	500 nM	TRIM37	26	15.27	27.85	2.24		2	7	500 nM	TRIM37	26	47.04	1037.86	2.25		3	9	500 nM	CON	26	40.79	157.97	2.42
1	11	500 nM	TRIM37	30	18.37	27.96	2.61		2	7	500 nM	TRIM37	30	49.04	1007.35	2.13		3	9	500 nM	CON	30	43.13	154.08	2.4
1	11	500 nM	TRIM37	34	19.39	26.43	2.46		2	7	500 nM	TRIM37	34	51.81	1022.41	2.64		3	9	500 nM	CON	34	43.93	140.14	2.67
1	11	500 nM	TRIM37	38	21.19	25.51	2.49		2	7	500 nM	TRIM37	38	53.6	1018.48	2.67		3	9	500 nM	CON	38	44.23	150.68	2.33
1	11	500 nM	TRIM37	42	22.3	24.96	2.69		2	7	500 nM	TRIM37	42	56.25	1020.12	2.29		3	9	500 nM	CON	42	45.03	155.76	2.3
1	11	500 nM	TRIM37	46	23.24	22.72	2.12		2	7	500 nM	TRIM37	46	55.69	979.44	2.17		3	9	500 nM	CON	46	47.75	151.46	2.57
1	11	500 nM	TRIM37	50	25.57	24.9	2.72		2	7	500 nM	TRIM37	50	57.26	983.45	2.26		3	9	500 nM	CON	50	47.46	148.57	2.18
1	11	500 nM	TRIM37	54	26.25	24.4	2.51		2	7	500 nM	TRIM37	54	61.27	979.11	2.58		3	9	500 nM	CON	54	49.39	137.46	2.07
1	11	500 nM	TRIM37	58	27.86	23.71	2.32		2	7	500 nM	TRIM37	58	60.09	966.82	2.28		3	9	500 nM	CON	58	53.21	130.96	2.27
1	11	500 nM	TRIM37	62	29.84	22.94	2.54		2	7	500 nM	TRIM37	62	64.21	979.94	2.09		3	9	500 nM	CON	62	56.45	135.64	2.13
1	11	500 nM	TRIM37	66	30.88	23.07	2.57		2	7	500 nM	TRIM37	66	65.39	974.35	2.55		3	9	500 nM	CON	66	58.31	147.34	2.65
1	11	500 nM	TRIM37	70	33.22	24.12	2.44		2	7	500 nM	TRIM37	70	67.18	955.98	2.27		3	9	500 nM	CON	70	58.77	143.43	2.73
1	11	500 nM	TRIM37	74	33.49	23.05	2.3		2	7	500 nM	TRIM37	74	70.72	953.9	2.46		3	9	500 nM	CON	74	56.21	138.04	2.69
1	11	500 nM	TRIM37	78	35.04	20.9	2.43		2	7	500 nM	TRIM37	78	70.7	902.94	2.49		3	9	500 nM	CON	78	56.66	141.03	2.33
1	11	500 nM	TRIM37	82	35.98	19.2	2.33		2	7	500 nM	TRIM37	82	67.64	992.78	2.38		3	9	500 nM	CON	82	59.21	158.05	2.83
1	11	500 nM	TRIM37	86	37.54	20	2.65		2	7	500 nM	TRIM37	86	74.14	982.46	2.24		3	9	500 nM	CON	86	58.74	149.19	2.15
1	11	500 nM	TRIM37	90	36.93	17.47	2.1		2	7	500 nM	TRIM37	90	73.7	983.45	2.31		3	9	500 nM	CON	90	59.42	137.08	2.23
1	11	500 nM	TRIM37	94	38.96	19.66	2.16		2	7	500 nM	TRIM37	94	75.47	971.89	2.22		3	9	500 nM	CON	94	60.2	130.8	2.25
1	11	500 nM	TRIM37	98	39.25	22.76	2.35		2	7	500 nM	TRIM37	98	76.54	956.76	2.33		3	9	500 nM	CON	98	61.86	144.01	2.28
									2	8	500 nM	TRIM37	0	347.83	196.28	2.17		3	10	500 nM	CON	0	323.16	192.96	9.76
									2	8	500 nM	TRIM37	4	346.35	198.18	2.36		3	10	500 nM	CON	4	324.13	193.96	9.68
									2	8	500 nM	TRIM37	8	339.27	195.45	2.51		3	10	500 nM	CON	8	322.98	192.62	10.48
									2	8	500 nM	TRIM37	10	5.36	190.93	2.23		3	10	500 nM	CON	10	5.78	187.46	9.22
									2	8	500 nM	TRIM37	14	21.57	194.03	2.3		3	10	500 nM	CON	14	10.79	191.43	9.78
									2	8	500 nM	TRIM37	18	20.71	190.89	2.17		3	10	500 nM	CON	18	13.52	191.87	9.93
									2	8	500 nM	TRIM37	22	20.52	188.97	2.24		3	10	500 nM	CON	22	14.73	187.11	9.24
									2	8	500 nM	TRIM37	26	21.06	190.64	2.06		3	10	500 nM	CON	26	16.68	187.07	8.74
									2	8	500 nM	TRIM37	30	20.2	187.96	2.06		3	10	500 nM	CON	30	18.16	188.92	9.36
									2	8	500 nM	TRIM37	34	22.26	183.23	2.5		3	10	500 nM	CON	34	19.89	190.95	9.07
									2	8	500 nM	TRIM37	38	22.11	186.39	2.73		3	10	500 nM	CON	38	21.36	185.19	10.2
									2	8	500 nM	TRIM37	42	21.44	191.38	2.03		3	10	500 nM	CON	42	22.17	185.78	9.49
									2	8	500 nM	TRIM37	46	21.24	183.95	2.16		3	10	500 nM	CON	46	23.68	185.81	10.08
									2	8	500 nM	TRIM37	50	22.57	184.76	2.59		3	10	500 nM	CON	50	25.42	186.56	10
									2	8	500 nM	TRIM37	54	21.99	182.88	2.55		3	10	500 nM	CON	54	26.71	181.8	9.87
									2	8	500 nM	TRIM37	58	23.11	180.21	2.46		3	10	500 nM	CON	58	27.15	184.29	9.2
									2	8	500 nM	TRIM37	62	22.39	187.85	2.3		3	10	500 nM	CON	62	28.05	183.05	9.3
									2	8	500 nM	TRIM37	66	24.97	182.55	2.51		3	10	500 nM	CON	66	28.61	179.66	9.14
									2	8	500 nM	TRIM37	70	24.1	186.78	2.59		3	10	500 nM	CON	70	30.24	181.58	9.34
									2	8	500 nM	TRIM37	74	22.69	189.47	2.43		3	10	500 nM	CON	74	30.49	178.49	9.59
									2	8	500 nM	TRIM37	78	26.51	187.72	2.6		3	10	500 nM	CON	78	31.47	178.87	9.61
									2	8	500 nM	TRIM37	82	27.63	182.53	2.18		3	10	500 nM	CON	82	33.47	179.83	7.25
									2	8	500 nM	TRIM37	86	29.44	182.35	2.52		3	10	500 nM	CON	86	34.49	175.6	7.28
									2	8	500 nM	TRIM37	90	29.15	181.64	2.43		3	10	500 nM	CON	90	35.06	177.35	6.91
									2	8	500 nM	TRIM37	94	30.97	184.23	2.63		3	10	500 nM	CON	94	35.63	175.87	7.09
									2	8	500 nM	TRIM37	98	30.9	181.58	2.1		3	10	500 nM	CON	98	36.07	176.83	7.15
									2	9	500 nM	TRIM37	0	1347.47	2753.82	2.14		3	11	500 nM	CON	0	380.27	172.2	2.45
									2	9	500 nM	TRIM37	4	1335.42	2691.47	2.22		3	11	500 nM	CON	4	375.35	178.93	2.45
									2	9	500 nM	TRIM37	8	1351.45	2730.6	2.33		3	11	500 nM	CON	8	369.33	168.14	2.43
									2	9	500 nM	TRIM37	10	72.54	2679.6	2.58		3	11	500 nM	CON	10	7.8	170.33	2.59
									2	9	500 nM	TRIM37	14	87.13	2706.41	2.45		3	11	500 nM	CON	14	12.23	172.39	2.86
									2	9	500 nM	TRIM37	18	91.55	2707.27	2.32		3	11	500 nM	CON	18	14.81	171.71	2.55
									2	9	500 nM	TRIM37	22	98.49	2690.92	2.5		3	11	500 nM	CON	22	15.69	169.38	2.4
									2	9	500 nM	TRIM37	26	101.86	2687.55	2.2		3	11	500 nM	CON	26	18.06	179.43	2.59
									2	9	500 nM	TRIM37	30	95.72	2693.48	2.3		3	11	500 nM	CON	30	18.78	172.56	2.4
									2	9	500 nM	TRIM37	34	96.48	2670.21	2.15		3	11	500 nM	CON	34	20.19	165.66	2.4
									2	9	500 nM	TRIM37	38	100.27	2674.28	2.41		3	11	500 nM	CON	38	22.01	172.97	2.49
									2	9	500 nM	TRIM37	42	101.28	2623.75	2.32		3	11	500 nM	CON	42	23.43	167.78	2.21
									2	9	500 nM	TRIM37	46	107.04	2582.28	2.55		3	11	500 nM	CON	46	23.99	167.42	2.23
									2	9	500 nM	TRIM37	50	106.01	2652.65	2.35		3	11	500 nM	CON	50	25.05	158.28	2.3
									2	9	500 nM	TRIM37	54	115.14	2595.14	2.55		3	11	500 nM	CON	54	26.25	156.59	2.45
									2	9	500 nM	TRIM37	58	120.41	2610.07	2.36		3	11	500 nM	CON	58	27.88	174.13	2.47
									2	9	500 nM	TRIM37	62	122.5	2631.28	2.53		3	11	500 nM	CON	62	28.65	152.83	2.17
									2	9	500 nM	TRIM37	66	125.04	2631.41	2.25		3	11	500 nM	CON	66	28.72	144.26	2.4
									2	9	500 nM	TRIM37	70	133.37	2577.87	2.37		3	11	500 nM	CON	70	29.89	135.25	2.5
									2	9	500 nM	TRIM37	74	131.38	2538.46	2.55		3	11	500 nM	CON	74	30.96	144.18	2.36
									2	9	500 nM	TRIM37	78	135.31	2544.66	2.14		3	11	500 nM	CON	78	31.08	139.76	2.2
									2	9	500 nM	TRIM37	82	136.26	2611.35	2.54		3	11	500 nM	CON	82	32.57	147.6	2.22
									2	9	500 nM	TRIM37	86	139.51	2579.31	2.3		3	11	500 nM	CON	86	33.87	145.98	2.26
									2	9	500 nM	TRIM37	90	139.71	2556.74	2.44		3	11	500 nM	CON	90	33.8	153.6	2.49
									2	9	500 nM	TRIM37	94	138.71	2538.11	2.54		3	11	500 nM	CON	94	35.04	149.02	2.42
									2	9	500 nM	TRIM37	98	138.28	2571.99	2.35		3	11	500 nM	CON	98	35.88	154.1	2.82
									2	10	500 nM	TRIM37	0	987.42	273.49	2.57
									2	10	500 nM	TRIM37	4	1013.3	286.47	2.09
									2	10	500 nM	TRIM37	8	1044.2	301.09	2.44
									2	10	500 nM	TRIM37	10	24.81	286.91	2.23
									2	10	500 nM	TRIM37	14	39.1	302.21	1.85
									2	10	500 nM	TRIM37	18	42.66	249.43	2.32
									2	10	500 nM	TRIM37	22	46.7	232.74	2.34
									2	10	500 nM	TRIM37	26	48.33	226.72	2.55
									2	10	500 nM	TRIM37	30	50.28	214.74	2.29
									2	10	500 nM	TRIM37	34	54.32	224.97	2.45
									2	10	500 nM	TRIM37	38	54.87	231.15	2.4
									2	10	500 nM	TRIM37	42	56.41	214.94	2.21
									2	10	500 nM	TRIM37	46	61.9	239.64	2.1
									2	10	500 nM	TRIM37	50	65.24	250.12	2.29
									2	10	500 nM	TRIM37	54	64.88	236.91	2.35
									2	10	500 nM	TRIM37	58	64.3	228.23	2.14
									2	10	500 nM	TRIM37	62	68.41	222.72	2.43
									2	10	500 nM	TRIM37	66	67.34	224.92	2.31
									2	10	500 nM	TRIM37	70	67.82	233.56	2.35
									2	10	500 nM	TRIM37	74	66.59	229.2	2.71
									2	10	500 nM	TRIM37	78	68.95	237.76	2.74
									2	10	500 nM	TRIM37	82	70.92	227.66	2.53
									2	10	500 nM	TRIM37	86	75.48	253	2.33
									2	10	500 nM	TRIM37	90	73.15	232	2.12
									2	10	500 nM	TRIM37	94	76.55	240.13	2.37
									2	10	500 nM	TRIM37	98	79.33	254.05	2.28
									2	11	500 nM	TRIM37	0	1558.85	1634.62	12.56
									2	11	500 nM	TRIM37	4	1563.61	1666.29	12.98
									2	11	500 nM	TRIM37	8	1568.31	1656.92	12.86
									2	11	500 nM	TRIM37	10	18.64	1606.33	12.85
									2	11	500 nM	TRIM37	14	32.63	1644.89	13.22
									2	11	500 nM	TRIM37	18	37.96	1639.84	13.42
									2	11	500 nM	TRIM37	22	42.85	1684.32	12.53
									2	11	500 nM	TRIM37	26	44.76	1675.37	13.08
									2	11	500 nM	TRIM37	30	48.45	1682.2	12.69
									2	11	500 nM	TRIM37	34	49.2	1659.71	12.39
									2	11	500 nM	TRIM37	38	53.25	1689.37	12.96
									2	11	500 nM	TRIM37	42	54.35	1704.6	12.56
									2	11	500 nM	TRIM37	46	56.62	1712.28	12.52
									2	11	500 nM	TRIM37	50	58.31	1716.74	12.43
									2	11	500 nM	TRIM37	54	58.89	1703.5	12.97
									2	11	500 nM	TRIM37	58	58.85	1712.13	12.26
									2	11	500 nM	TRIM37	62	60.76	1741.27	12.34
									2	11	500 nM	TRIM37	66	60.86	1739.67	12.71
									2	11	500 nM	TRIM37	70	62.49	1730.46	12.84
									2	11	500 nM	TRIM37	74	63.78	1715.68	13.2
									2	11	500 nM	TRIM37	78	65.13	1709.14	13
									2	11	500 nM	TRIM37	82	63.93	1688.9	12.54
									2	11	500 nM	TRIM37	86	66.66	1699.28	13.17
									2	11	500 nM	TRIM37	90	67.73	1706.57	12.71
									2	11	500 nM	TRIM37	94	70.72	1710.81	12.3
									2	11	500 nM	TRIM37	98	71.72	1714.52	12.83
									2	12	500 nM	TRIM37	0	341.27	1318.65	3.26
									2	12	500 nM	TRIM37	4	331.91	1314.25	3.15
									2	12	500 nM	TRIM37	8	337.39	1308.78	3.12
									2	12	500 nM	TRIM37	10	5.96	1276.04	3.48
									2	12	500 nM	TRIM37	14	9.98	1242.16	3.09
									2	12	500 nM	TRIM37	18	12.93	1277.72	3.15
									2	12	500 nM	TRIM37	22	15.1	1266.77	3.34
									2	12	500 nM	TRIM37	26	17.78	1309.89	3.13
									2	12	500 nM	TRIM37	30	19.83	1292.6	3.55
									2	12	500 nM	TRIM37	34	20.34	1244.72	3.01
									2	12	500 nM	TRIM37	38	22.78	1233.96	3.32
									2	12	500 nM	TRIM37	42	24.32	1280.44	3.54
									2	12	500 nM	TRIM37	46	24.99	1252.99	3.2
									2	12	500 nM	TRIM37	50	25.79	1247.05	3.22
									2	12	500 nM	TRIM37	54	27.26	1195.75	3.02
									2	12	500 nM	TRIM37	58	28.55	1211.84	3.44
									2	12	500 nM	TRIM37	62	30.32	1230.88	3.37
									2	12	500 nM	TRIM37	66	33.29	1248.61	3.3
									2	12	500 nM	TRIM37	70	32.03	1205.92	3.33
									2	12	500 nM	TRIM37	74	34.9	1213.81	3.63
									2	12	500 nM	TRIM37	78	35.99	1151.87	3.47
									2	12	500 nM	TRIM37	82	36.77	1111.23	3.21
									2	12	500 nM	TRIM37	86	36.39	1109.28	2.92
									2	12	500 nM	TRIM37	90	39.09	1169.4	2.94
									2	12	500 nM	TRIM37	94	39	1177.13	3.29
									2	12	500 nM	TRIM37	98	41.49	1164.69	3.41
