# Supplementary material for: Global cellular response to chemical perturbation of PLK4 activity and abnormal centrosome number
Source: eLife. 2022 Jun 27;11:e73944. doi: 10.7554/eLife.73944 (PMC9236612; doi:10.7554/eLife.73944)
Supplement: Figure 7—source data 1. [file elife-73944-fig7-data1.xlsx]

## Sheet: Figure7C
Replicate	Line	TRIM37 rescue construct	Condition	Intensity	DMSO average	Percent DMSO
1	dTRIM37	505-709	DMSO	3543.79	4205.94	0.842569
1	dTRIM37	505-709	DMSO	4868.08	4205.94	1.15743
1	dTRIM37	505-709	50 nM	2003.12	4205.94	0.476261
1	dTRIM37	505-709	50 nM	2521.5	4205.94	0.59951
1	dTRIM37	505-709	125 nM	1438.31	4205.94	0.341971
1	dTRIM37	505-709	125 nM	1734.06	4205.94	0.412288
1	dTRIM37	505-709	150 nM	3932.97	4205.94	0.935099
1	dTRIM37	505-709	150 nM	4576.41	4205.94	1.08808
1	dTRIM37	505-709	167 nM	4584.21	4205.94	1.08994
1	dTRIM37	505-709	167 nM	3686.23	4205.94	0.876435
1	dTRIM37	505-709	200 nM	4483.26	4205.94	1.06594
1	dTRIM37	505-709	200 nM	4139.91	4205.94	0.984301
1	dTRIM37	505-709	500 nM	2759.49	4205.94	0.656093
1	dTRIM37	505-709	500 nM	2813.37	4205.94	0.668905
2	dTRIM37	505-709	DMSO	5664.82	5672.69	0.998614
2	dTRIM37	505-709	DMSO	5680.55	5672.69	1.00139
2	dTRIM37	505-709	50 nM	4219.52	5672.69	0.74383
2	dTRIM37	505-709	50 nM	3879.48	5672.69	0.683887
2	dTRIM37	505-709	125 nM	1939.5	5672.69	0.341901
2	dTRIM37	505-709	125 nM	2273.8	5672.69	0.400833
2	dTRIM37	505-709	150 nM	2680.08	5672.69	0.472454
2	dTRIM37	505-709	150 nM	3393.28	5672.69	0.598178
2	dTRIM37	505-709	167 nM	3015.19	5672.69	0.531527
2	dTRIM37	505-709	167 nM	2820.17	5672.69	0.497149
2	dTRIM37	505-709	200 nM	3889.89	5672.69	0.685722
2	dTRIM37	505-709	200 nM	3119.2	5672.69	0.549862
2	dTRIM37	505-709	500 nM	1896.6	5672.69	0.334339
2	dTRIM37	505-709	500 nM	1856.21	5672.69	0.327219
3	dTRIM37	505-709	DMSO	3525.76	4105.47	0.858795
3	dTRIM37	505-709	DMSO	4685.19	4105.47	1.1412
3	dTRIM37	505-709	50 nM	1794.58	4105.47	0.437119
3	dTRIM37	505-709	50 nM	1614.01	4105.47	0.393137
3	dTRIM37	505-709	125 nM	1191.04	4105.47	0.29011
3	dTRIM37	505-709	125 nM	1046.1	4105.47	0.254805
3	dTRIM37	505-709	150 nM	1690.84	4105.47	0.41185
3	dTRIM37	505-709	150 nM	2160.28	4105.47	0.526194
3	dTRIM37	505-709	167 nM	1791.62	4105.47	0.436397
3	dTRIM37	505-709	167 nM	2153.25	4105.47	0.524482
3	dTRIM37	505-709	200 nM	1576.1	4105.47	0.383902
3	dTRIM37	505-709	200 nM	1726.48	4105.47	0.420532
3	dTRIM37	505-709	500 nM	1525.33	4105.47	0.371537
3	dTRIM37	505-709	500 nM	1637.58	4105.47	0.398878
1	dTRIM37	d505-709	DMSO	5294.96	5602.59	0.945091
1	dTRIM37	d505-709	DMSO	5910.23	5602.59	1.05491
1	dTRIM37	d505-709	50 nM	4258.92	5602.59	0.76017
1	dTRIM37	d505-709	50 nM	4598.76	5602.59	0.820827
1	dTRIM37	d505-709	125 nM	971.954	5602.59	0.173483
1	dTRIM37	d505-709	125 nM	830.652	5602.59	0.148262
1	dTRIM37	d505-709	150 nM	1377.06	5602.59	0.24579
1	dTRIM37	d505-709	150 nM	1317.46	5602.59	0.235152
1	dTRIM37	d505-709	167 nM	1376.32	5602.59	0.245658
1	dTRIM37	d505-709	167 nM	1027.48	5602.59	0.183394
1	dTRIM37	d505-709	200 nM	673.211	5602.59	0.120161
1	dTRIM37	d505-709	200 nM	597.894	5602.59	0.106717
1	dTRIM37	d505-709	500 nM	687.251	5602.59	0.122667
1	dTRIM37	d505-709	500 nM	695.62	5602.59	0.12416
2	dTRIM37	d505-709	DMSO	5756.63	6138.97	0.93772
2	dTRIM37	d505-709	DMSO	6521.31	6138.97	1.06228
2	dTRIM37	d505-709	50 nM	4217.45	6138.97	0.686996
2	dTRIM37	d505-709	50 nM	4233.27	6138.97	0.689573
2	dTRIM37	d505-709	125 nM	1475.54	6138.97	0.240357
2	dTRIM37	d505-709	125 nM	1180.1	6138.97	0.192231
2	dTRIM37	d505-709	150 nM	1445.77	6138.97	0.235508
2	dTRIM37	d505-709	150 nM	1819.68	6138.97	0.296415
2	dTRIM37	d505-709	167 nM	1628.85	6138.97	0.265329
2	dTRIM37	d505-709	167 nM	1466.22	6138.97	0.238838
2	dTRIM37	d505-709	200 nM	1667.05	6138.97	0.271552
2	dTRIM37	d505-709	200 nM	1719.28	6138.97	0.280061
2	dTRIM37	d505-709	500 nM	886.959	6138.97	0.14448
2	dTRIM37	d505-709	500 nM	1009.2	6138.97	0.164392
3	dTRIM37	d505-709	DMSO	5821.11	5727.86	1.01628
3	dTRIM37	d505-709	DMSO	5634.6	5727.86	0.983719
3	dTRIM37	d505-709	50 nM	4093.7	5727.86	0.7147
3	dTRIM37	d505-709	50 nM	4266.41	5727.86	0.744852
3	dTRIM37	d505-709	125 nM	716.261	5727.86	0.125049
3	dTRIM37	d505-709	125 nM	858.111	5727.86	0.149814
3	dTRIM37	d505-709	150 nM	1050.06	5727.86	0.183325
3	dTRIM37	d505-709	150 nM	981.167	5727.86	0.171297
3	dTRIM37	d505-709	167 nM	980.442	5727.86	0.171171
3	dTRIM37	d505-709	167 nM	820.19	5727.86	0.143193
3	dTRIM37	d505-709	200 nM	516.839	5727.86	0.0902325
3	dTRIM37	d505-709	200 nM	449.967	5727.86	0.0785577
3	dTRIM37	d505-709	500 nM	490.083	5727.86	0.0855613
3	dTRIM37	d505-709	500 nM	817.744	5727.86	0.142766
1	dTRIM37	none	DMSO	6201.71	6188.76	1.00209
1	dTRIM37	none	DMSO	6175.81	6188.76	0.997907
1	dTRIM37	none	50 nM	3761.05	6188.76	0.607723
1	dTRIM37	none	50 nM	2479.77	6188.76	0.40069
1	dTRIM37	none	125 nM	1620.75	6188.76	0.261886
1	dTRIM37	none	125 nM	1641.43	6188.76	0.265228
1	dTRIM37	none	150 nM	4644.66	6188.76	0.750498
1	dTRIM37	none	150 nM	4052.49	6188.76	0.654814
1	dTRIM37	none	167 nM	4036.09	6188.76	0.652164
1	dTRIM37	none	167 nM	4889.69	6188.76	0.790092
1	dTRIM37	none	200 nM	4175.49	6188.76	0.674689
1	dTRIM37	none	200 nM	4271.1	6188.76	0.690139
1	dTRIM37	none	500 nM	3626.05	6188.76	0.585909
1	dTRIM37	none	500 nM	2628.54	6188.76	0.424728
2	dTRIM37	none	DMSO	5769.77	6232.05	0.925821
2	dTRIM37	none	DMSO	6694.34	6232.05	1.07418
2	dTRIM37	none	50 nM	2079.47	6232.05	0.333674
2	dTRIM37	none	50 nM	3097.25	6232.05	0.496987
2	dTRIM37	none	125 nM	2523.08	6232.05	0.404855
2	dTRIM37	none	125 nM	2086.18	6232.05	0.33475
2	dTRIM37	none	150 nM	3854.24	6232.05	0.618454
2	dTRIM37	none	150 nM	4982.61	6232.05	0.799513
2	dTRIM37	none	167 nM	2864.45	6232.05	0.459632
2	dTRIM37	none	167 nM	2730.81	6232.05	0.438188
2	dTRIM37	none	200 nM	2510.7	6232.05	0.402869
2	dTRIM37	none	200 nM	2846.07	6232.05	0.456683
2	dTRIM37	none	500 nM	2351.24	6232.05	0.377282
2	dTRIM37	none	500 nM	1995.61	6232.05	0.320218
3	dTRIM37	none	DMSO	3934.38	4523.97	0.869674
3	dTRIM37	none	DMSO	5113.56	4523.97	1.13033
3	dTRIM37	none	50 nM	2142.41	4523.97	0.47357
3	dTRIM37	none	50 nM	1848.16	4523.97	0.408526
3	dTRIM37	none	125 nM	1885.31	4523.97	0.416737
3	dTRIM37	none	125 nM	1877.13	4523.97	0.414931
3	dTRIM37	none	150 nM	1681.76	4523.97	0.371744
3	dTRIM37	none	150 nM	2639.29	4523.97	0.583401
3	dTRIM37	none	167 nM	1853.33	4523.97	0.40967
3	dTRIM37	none	167 nM	2224.24	4523.97	0.491657
3	dTRIM37	none	200 nM	2319.73	4523.97	0.512765
3	dTRIM37	none	200 nM	2028.15	4523.97	0.448312
3	dTRIM37	none	500 nM	2811.14	4523.97	0.621389
3	dTRIM37	none	500 nM	2157.21	4523.97	0.476841
1	dTRIM37	FLAG-BirA	DMSO	3995.95	3663.53	1.09074
1	dTRIM37	FLAG-BirA	DMSO	3331.1	3663.53	0.90926
1	dTRIM37	FLAG-BirA	50 nM	1841.43	3663.53	0.502639
1	dTRIM37	FLAG-BirA	50 nM	1253.24	3663.53	0.342085
1	dTRIM37	FLAG-BirA	125 nM	828.306	3663.53	0.226095
1	dTRIM37	FLAG-BirA	125 nM	997.725	3663.53	0.27234
1	dTRIM37	FLAG-BirA	150 nM	2145.94	3663.53	0.585758
1	dTRIM37	FLAG-BirA	150 nM	2064.65	3663.53	0.563569
1	dTRIM37	FLAG-BirA	167 nM	1761.51	3663.53	0.480824
1	dTRIM37	FLAG-BirA	167 nM	2497.8	3663.53	0.681802
1	dTRIM37	FLAG-BirA	200 nM	1952.26	3663.53	0.53289
1	dTRIM37	FLAG-BirA	200 nM	2522.4	3663.53	0.688517
1	dTRIM37	FLAG-BirA	500 nM	2292.4	3663.53	0.625736
1	dTRIM37	FLAG-BirA	500 nM	2279.93	3663.53	0.622333
2	dTRIM37	FLAG-BirA	DMSO	3447.38	4058.28	0.84947
2	dTRIM37	FLAG-BirA	DMSO	4669.17	4058.28	1.15053
2	dTRIM37	FLAG-BirA	50 nM	2679.85	4058.28	0.660342
2	dTRIM37	FLAG-BirA	50 nM	2295.11	4058.28	0.565537
2	dTRIM37	FLAG-BirA	125 nM	2005.84	4058.28	0.494259
2	dTRIM37	FLAG-BirA	125 nM	1749.64	4058.28	0.43113
2	dTRIM37	FLAG-BirA	150 nM	2693.23	4058.28	0.66364
2	dTRIM37	FLAG-BirA	150 nM	3881.6	4058.28	0.956465
2	dTRIM37	FLAG-BirA	167 nM	2487.02	4058.28	0.612827
2	dTRIM37	FLAG-BirA	167 nM	2595.33	4058.28	0.639515
2	dTRIM37	FLAG-BirA	200 nM	2495.69	4058.28	0.614964
2	dTRIM37	FLAG-BirA	200 nM	3367.69	4058.28	0.829832
2	dTRIM37	FLAG-BirA	500 nM	2001.72	4058.28	0.493245
2	dTRIM37	FLAG-BirA	500 nM	1706.96	4058.28	0.420611
3	dTRIM37	FLAG-BirA	DMSO	2482.12	2499.19	0.993169
3	dTRIM37	FLAG-BirA	DMSO	2516.27	2499.19	1.00683
3	dTRIM37	FLAG-BirA	50 nM	1392.14	2499.19	0.557036
3	dTRIM37	FLAG-BirA	50 nM	1208.35	2499.19	0.483496
3	dTRIM37	FLAG-BirA	125 nM	837.192	2499.19	0.334985
3	dTRIM37	FLAG-BirA	125 nM	1059.68	2499.19	0.424009
3	dTRIM37	FLAG-BirA	150 nM	1817.7	2499.19	0.727317
3	dTRIM37	FLAG-BirA	150 nM	1806.26	2499.19	0.722739
3	dTRIM37	FLAG-BirA	167 nM	1340.27	2499.19	0.53628
3	dTRIM37	FLAG-BirA	167 nM	1455.43	2499.19	0.58236
3	dTRIM37	FLAG-BirA	200 nM	1477.87	2499.19	0.591338
3	dTRIM37	FLAG-BirA	200 nM	1454.26	2499.19	0.581893
3	dTRIM37	FLAG-BirA	500 nM	1117.16	2499.19	0.447008
3	dTRIM37	FLAG-BirA	500 nM	1312.33	2499.19	0.525103
1	dTRIM37	WT	DMSO	7349.12	7274.12	1.01031
1	dTRIM37	WT	DMSO	7199.12	7274.12	0.989689
1	dTRIM37	WT	50 nM	6427.45	7274.12	0.883605
1	dTRIM37	WT	50 nM	5940.38	7274.12	0.816646
1	dTRIM37	WT	125 nM	1655.02	7274.12	0.227521
1	dTRIM37	WT	125 nM	1403.52	7274.12	0.192946
1	dTRIM37	WT	150 nM	1718.84	7274.12	0.236295
1	dTRIM37	WT	150 nM	2087.85	7274.12	0.287024
1	dTRIM37	WT	167 nM	1862.56	7274.12	0.256053
1	dTRIM37	WT	167 nM	1946.11	7274.12	0.267538
1	dTRIM37	WT	200 nM	1865.2	7274.12	0.256416
1	dTRIM37	WT	200 nM	1689.54	7274.12	0.232267
1	dTRIM37	WT	500 nM	1465.84	7274.12	0.201514
1	dTRIM37	WT	500 nM	938.22	7274.12	0.128981
2	dTRIM37	WT	DMSO	5951.08	5907.43	1.00739
2	dTRIM37	WT	DMSO	5863.78	5907.43	0.992611
2	dTRIM37	WT	50 nM	4635.75	5907.43	0.784733
2	dTRIM37	WT	50 nM	4230.58	5907.43	0.716147
2	dTRIM37	WT	125 nM	1864.35	5907.43	0.315594
2	dTRIM37	WT	125 nM	1335.94	5907.43	0.226146
2	dTRIM37	WT	150 nM	1717.29	5907.43	0.2907
2	dTRIM37	WT	150 nM	1374.3	5907.43	0.23264
2	dTRIM37	WT	167 nM	1404.94	5907.43	0.237827
2	dTRIM37	WT	167 nM	1263.56	5907.43	0.213893
2	dTRIM37	WT	200 nM	1731.96	5907.43	0.293183
2	dTRIM37	WT	200 nM	1456.66	5907.43	0.246581
2	dTRIM37	WT	500 nM	972.872	5907.43	0.164686
2	dTRIM37	WT	500 nM	1013.37	5907.43	0.171542
3	dTRIM37	WT	DMSO	4921.1	4481.15	1.09818
3	dTRIM37	WT	DMSO	4041.2	4481.15	0.901821
3	dTRIM37	WT	50 nM	2296.61	4481.15	0.512504
3	dTRIM37	WT	50 nM	2635.77	4481.15	0.58819
3	dTRIM37	WT	125 nM	692.828	4481.15	0.154609
3	dTRIM37	WT	125 nM	940.267	4481.15	0.209827
3	dTRIM37	WT	150 nM	1228.66	4481.15	0.274185
3	dTRIM37	WT	150 nM	1386.03	4481.15	0.309302
3	dTRIM37	WT	167 nM	848.381	4481.15	0.189322
3	dTRIM37	WT	167 nM	826.083	4481.15	0.184346
3	dTRIM37	WT	200 nM	631.677	4481.15	0.140963
3	dTRIM37	WT	200 nM	679.169	4481.15	0.151561
3	dTRIM37	WT	500 nM	840.27	4481.15	0.187512
3	dTRIM37	WT	500 nM	1159.42	4481.15	0.258733
1	WT	none	DMSO	7673.58	8473.68	0.905578
1	WT	none	DMSO	9273.79	8473.68	1.09442
1	WT	none	50 nM	7075.41	8473.68	0.834986
1	WT	none	50 nM	6282.22	8473.68	0.74138
1	WT	none	125 nM	1956	8473.68	0.230833
1	WT	none	125 nM	1497.98	8473.68	0.176781
1	WT	none	150 nM	1739.15	8473.68	0.205241
1	WT	none	150 nM	1886.22	8473.68	0.222598
1	WT	none	167 nM	1447.88	8473.68	0.170868
1	WT	none	167 nM	1515.95	8473.68	0.178901
1	WT	none	200 nM	1483.83	8473.68	0.17511
1	WT	none	200 nM	1555.84	8473.68	0.183608
1	WT	none	500 nM	1319.62	8473.68	0.155731
1	WT	none	500 nM	1234.88	8473.68	0.145732
2	WT	none	DMSO	6966.77	6917.37	1.00714
2	WT	none	DMSO	6867.98	6917.37	0.99286
2	WT	none	50 nM	5003.61	6917.37	0.723339
2	WT	none	50 nM	4651.59	6917.37	0.67245
2	WT	none	125 nM	790.879	6917.37	0.114332
2	WT	none	125 nM	563.96	6917.37	0.0815281
2	WT	none	150 nM	706.944	6917.37	0.102198
2	WT	none	150 nM	1228.54	6917.37	0.177602
2	WT	none	167 nM	481.982	6917.37	0.069677
2	WT	none	167 nM	469.426	6917.37	0.0678619
2	WT	none	200 nM	368.625	6917.37	0.0532897
2	WT	none	200 nM	196.595	6917.37	0.0284205
2	WT	none	500 nM	867.691	6917.37	0.125436
2	WT	none	500 nM	1170.98	6917.37	0.169282
3	WT	none	DMSO	6903281	6.78937e+06	1.01678
3	WT	none	DMSO	6675462	6.78937e+06	0.983222
3	WT	none	50 nM	3764637	6.78937e+06	0.55449
3	WT	none	50 nM	6002378	6.78937e+06	0.884084
3	WT	none	125 nM	1111731	6.78937e+06	0.163746
3	WT	none	125 nM	2210147	6.78937e+06	0.32553
3	WT	none	150 nM	2471667	6.78937e+06	0.364049
3	WT	none	150 nM	2784307	6.78937e+06	0.410098
3	WT	none	167 nM	1975740	6.78937e+06	0.291005
3	WT	none	167 nM	2990701	6.78937e+06	0.440497
3	WT	none	200 nM	1043342	6.78937e+06	0.153673
3	WT	none	200 nM	1646236	6.78937e+06	0.242473
3	WT	none	500 nM	1266418	6.78937e+06	0.186529
3	WT	none	500 nM	2289101	6.78937e+06	0.337159
