# Supplementary figures and images for: Global cellular response to chemical perturbation of PLK4 activity and abnormal centrosome number
Source: eLife journal article supplement (doi:10.7554/elife.73944), 2022-06-10

1B

p53

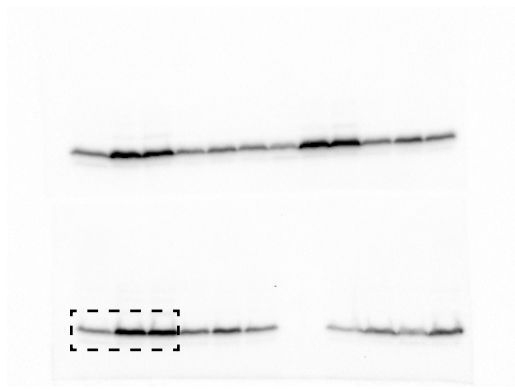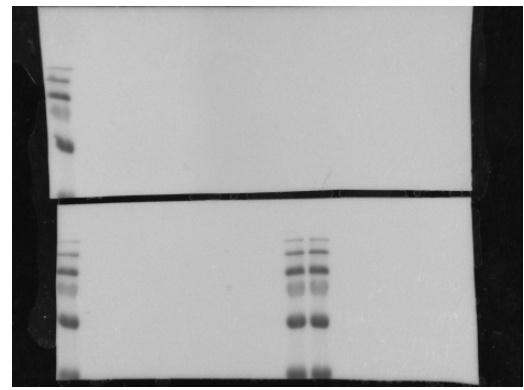

p21

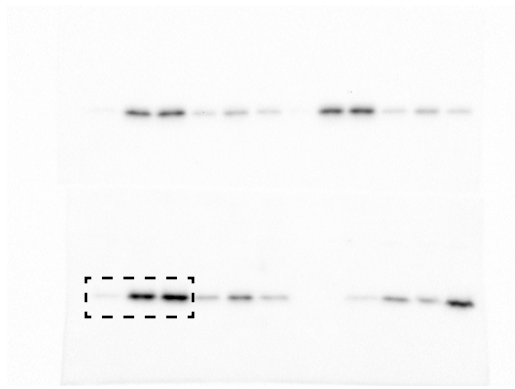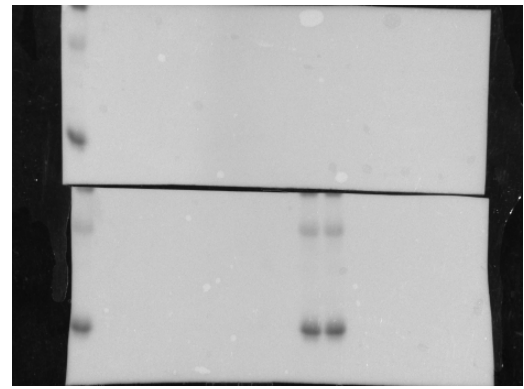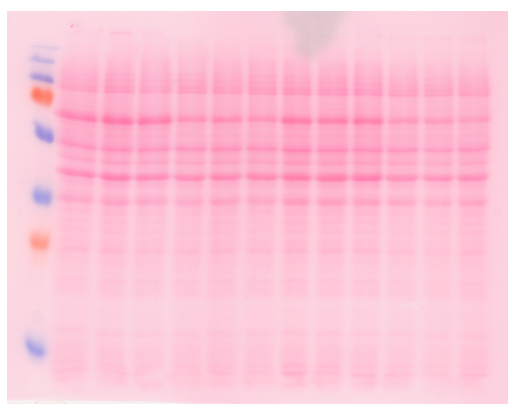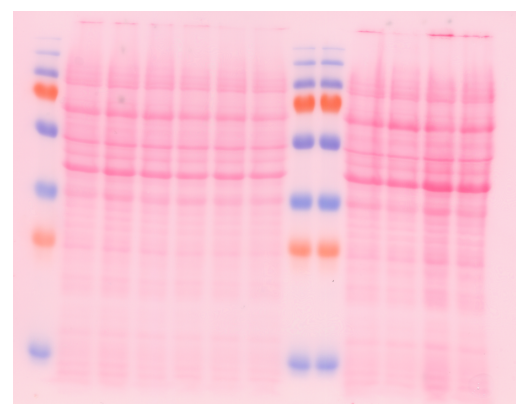

Figure1 Western blots

\*\*\*samples imaged with those for Figure 3

Supplement: data2 [file elife-73944-data2-v1.zip]

6B

CEP192

TRIM37

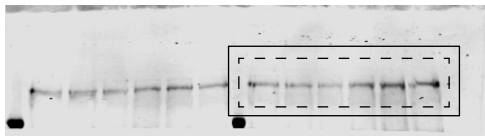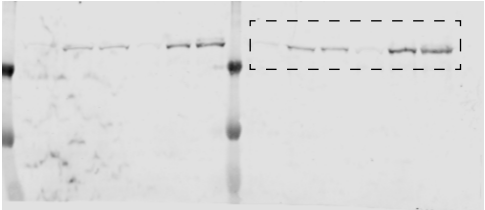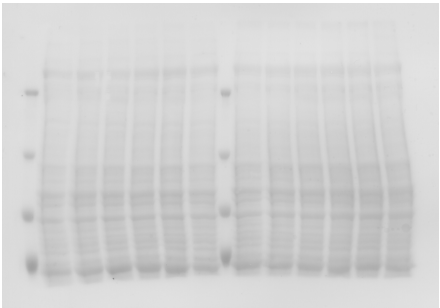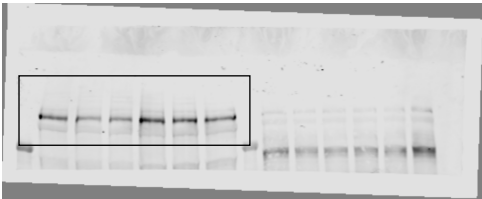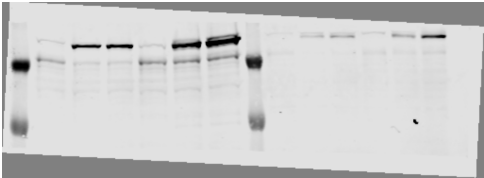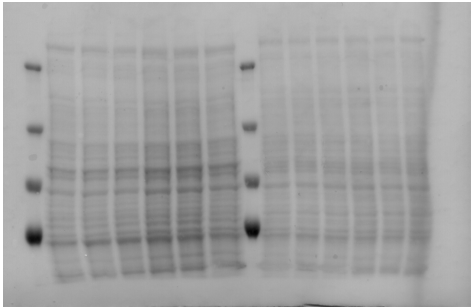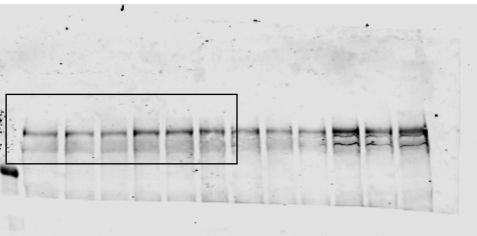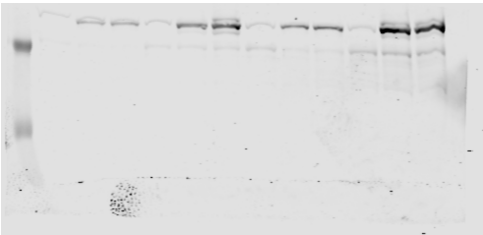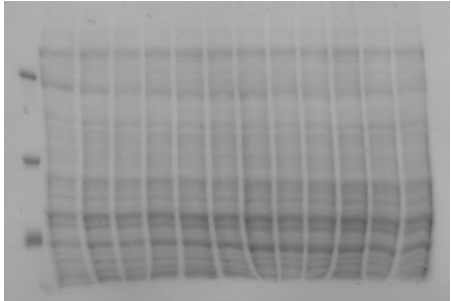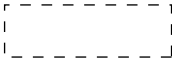

used for figure

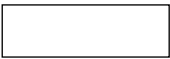

used for quantification

Figure 6 Western blots

Supplement: data2 [file elife-73944-data2-v1.zip]

1C

TRIM37

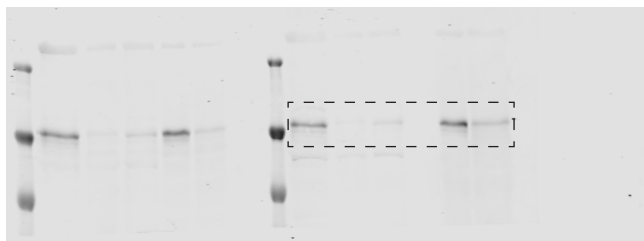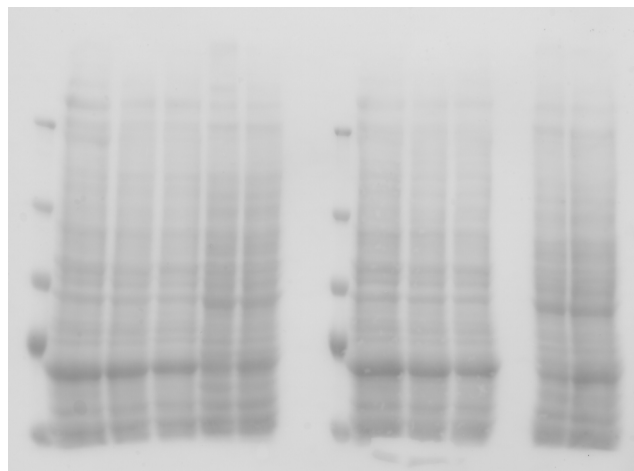

2A

FLAG

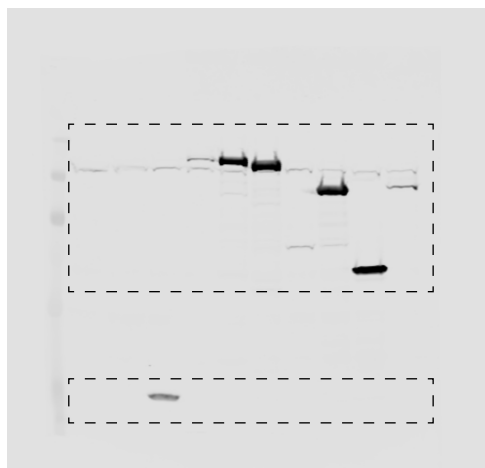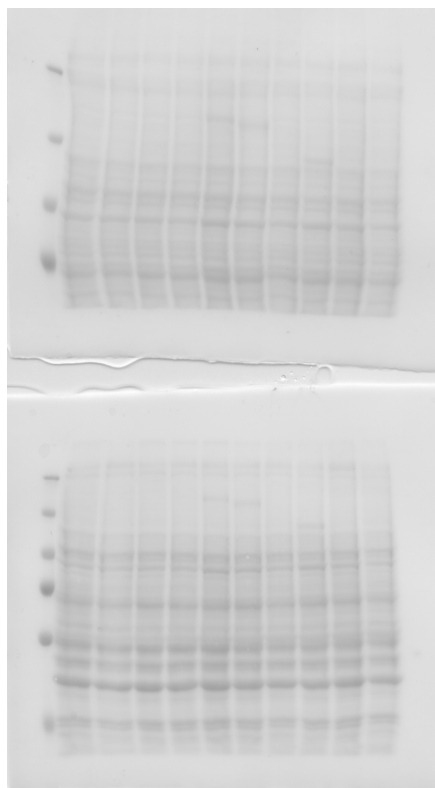

Figure 3 - figure supplement 1 and 2 Western blots

Supplement: data2 [file elife-73944-data2-v1.zip]

7B

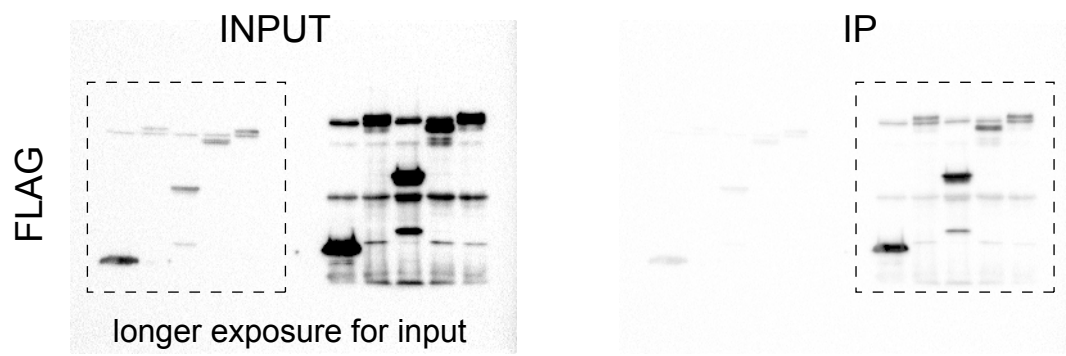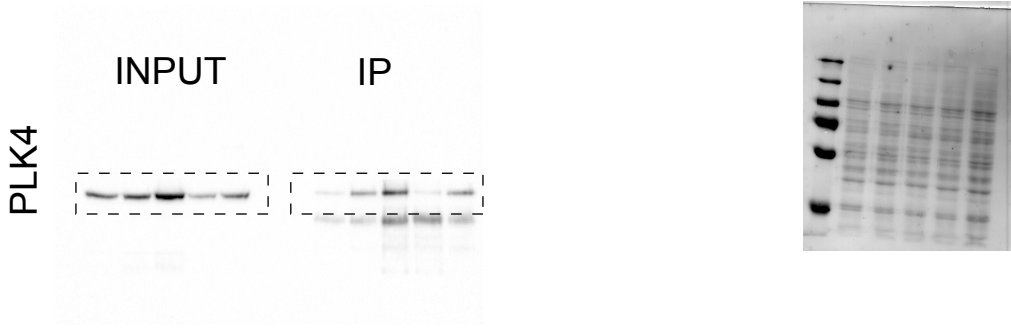

7D

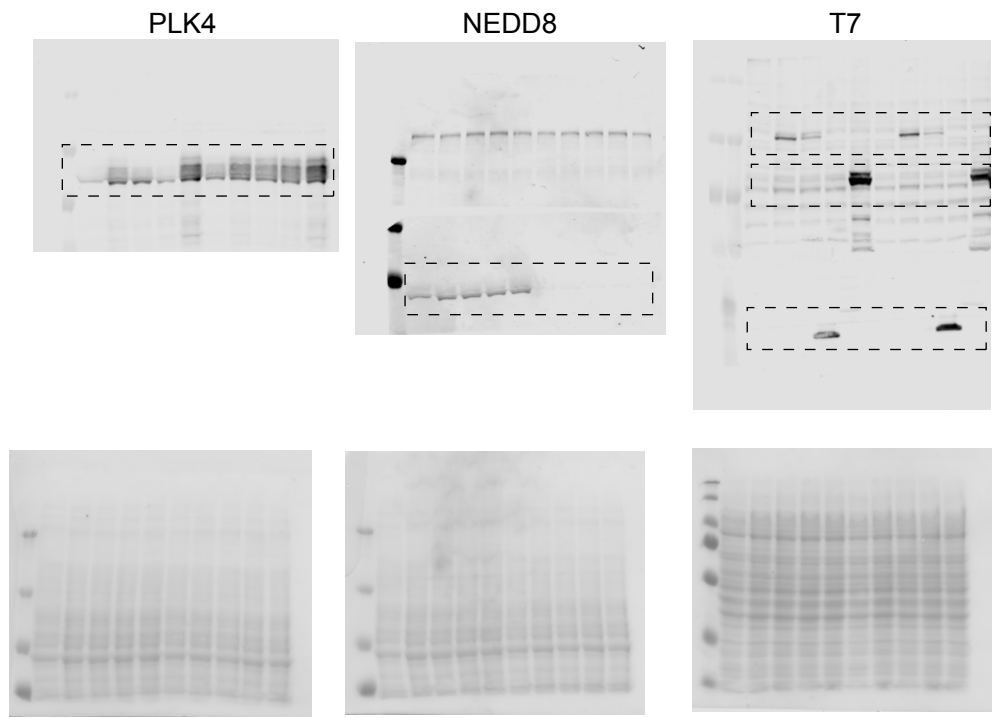

Figure 7 Western blots

7E

PLK4

HA-Ub

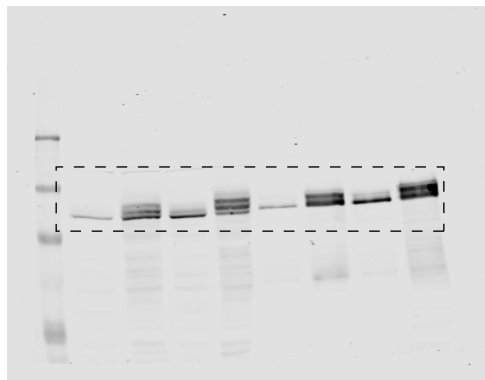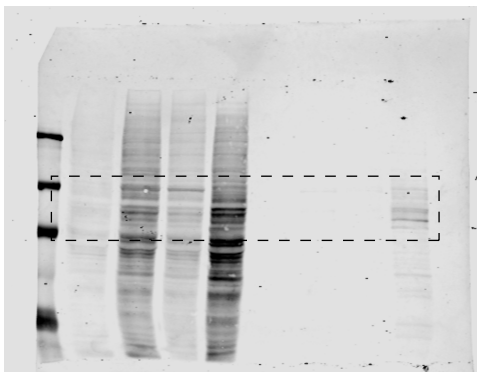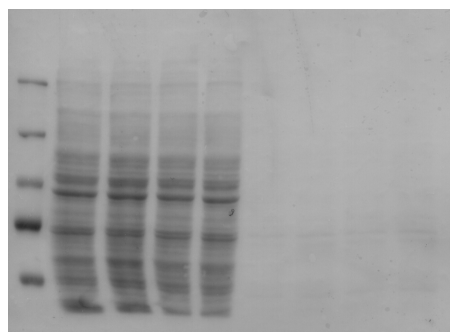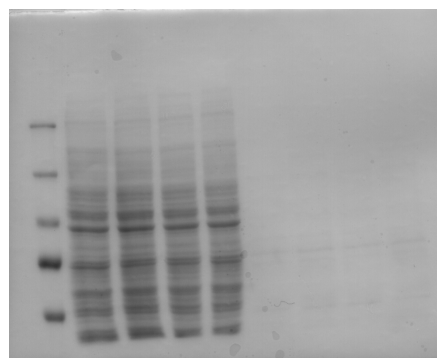

7F

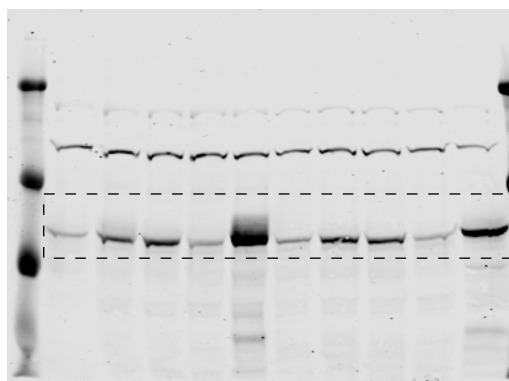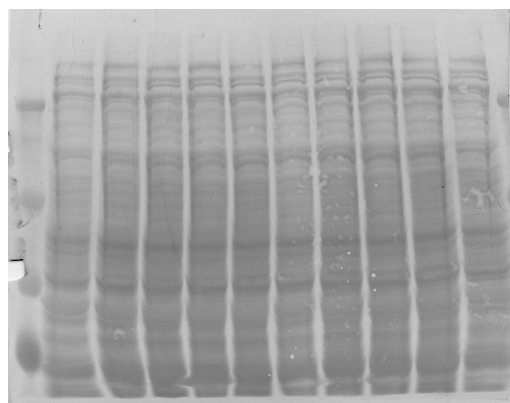

Figure 7 Western blots

7G

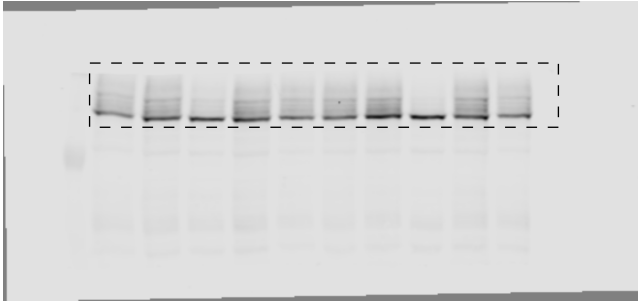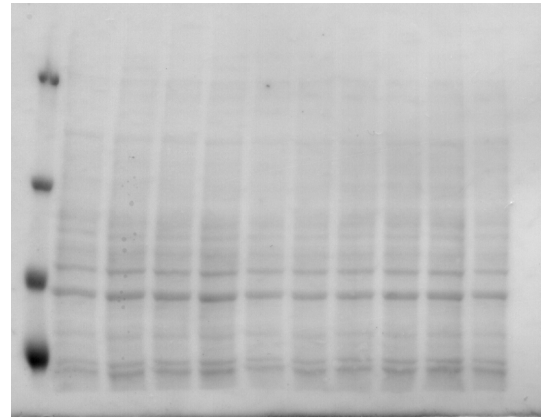

Figure 7 Western blots

Supplement: data2 [file elife-73944-data2-v1.zip]

3B

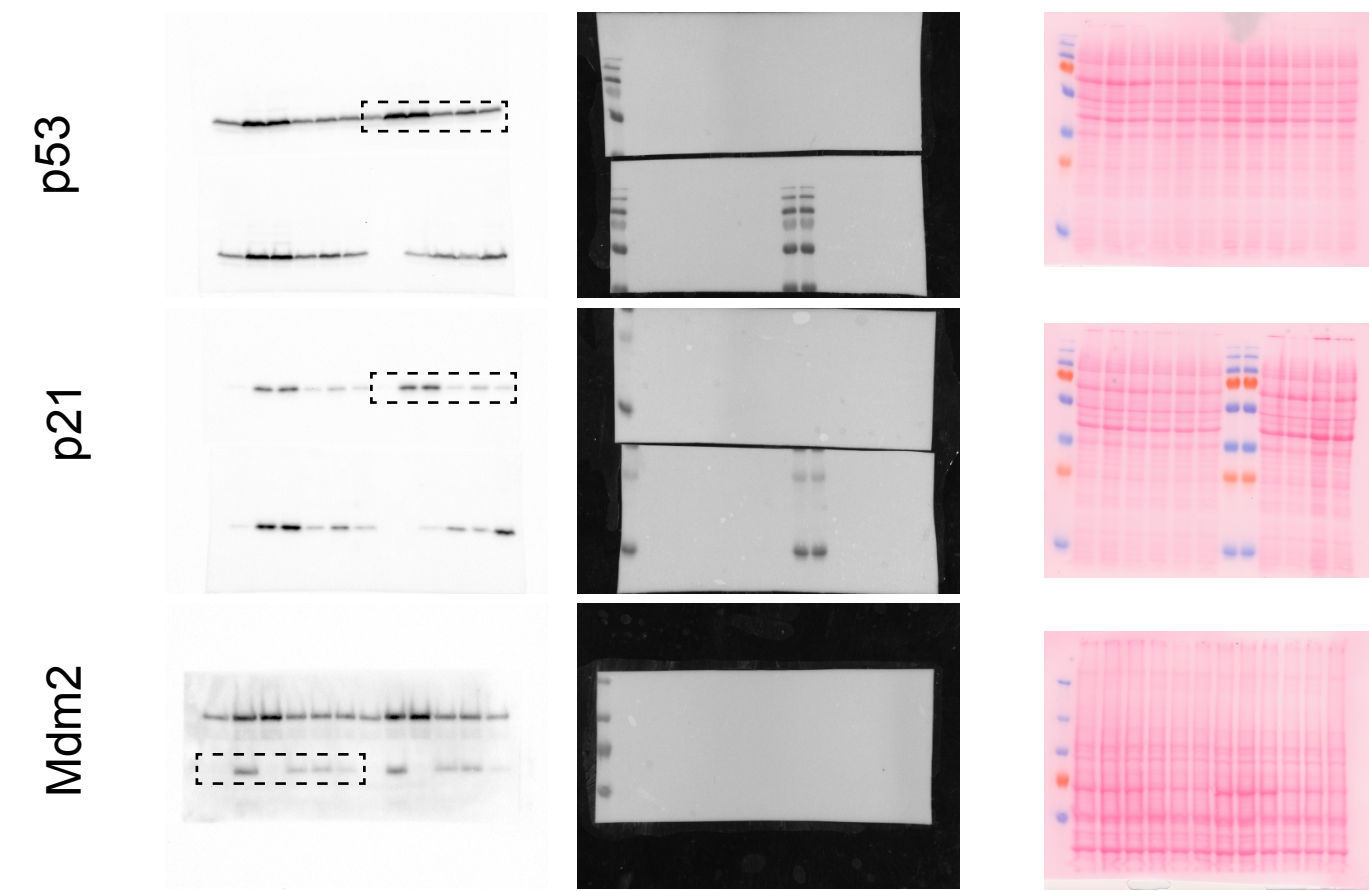

Figure 3 Western blots

\*\*\*samples imaged with those from Figure 1

Supplement: data2 [file elife-73944-data2-v1.zip]
